# Supplementary material
Source: PubMed Central journal article supplement (PMC3176443)
Supplement: NIHMS318420-supplement-02.pdf [file NIHMS318420-supplement-02.pdf]

A

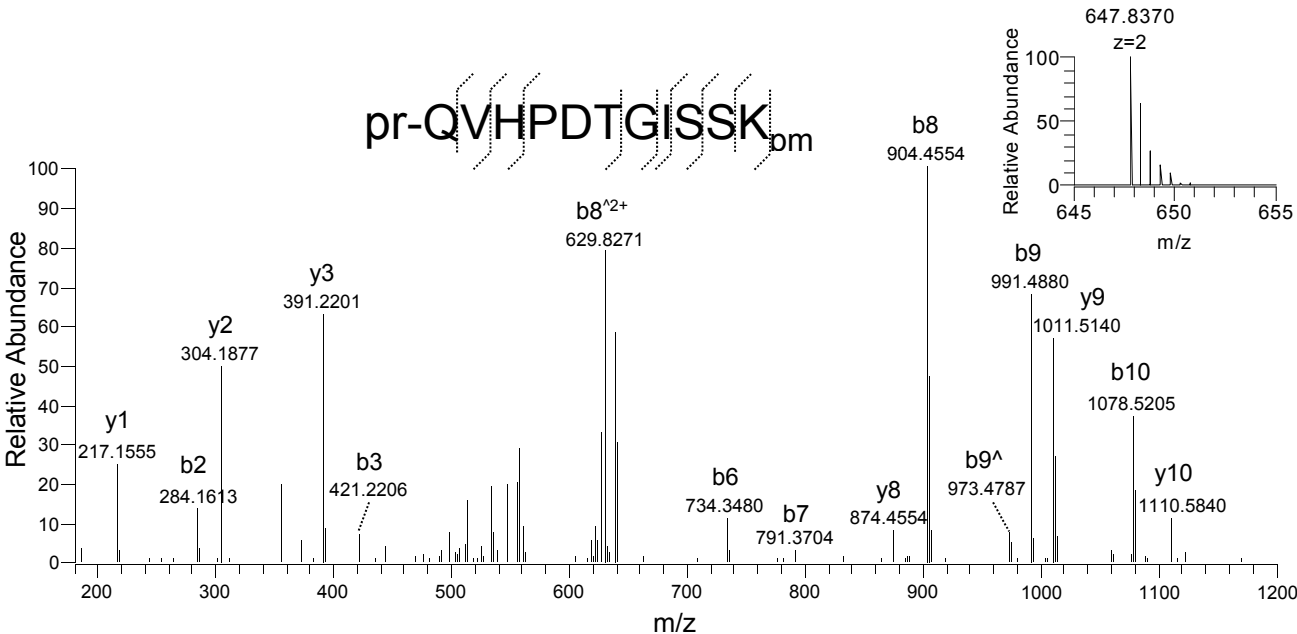

B

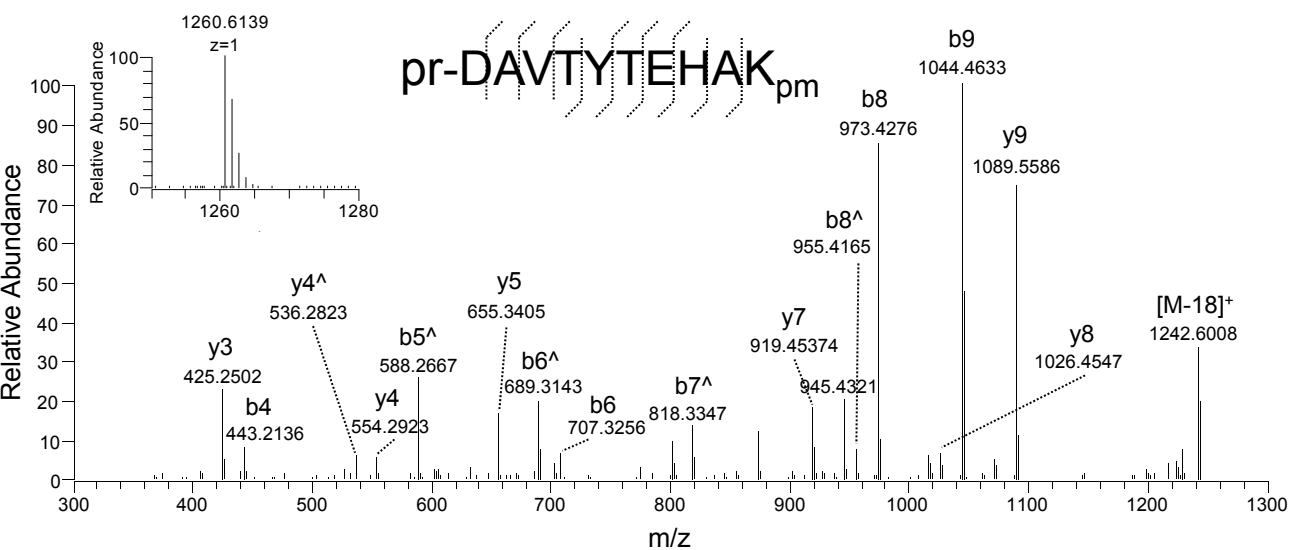

C

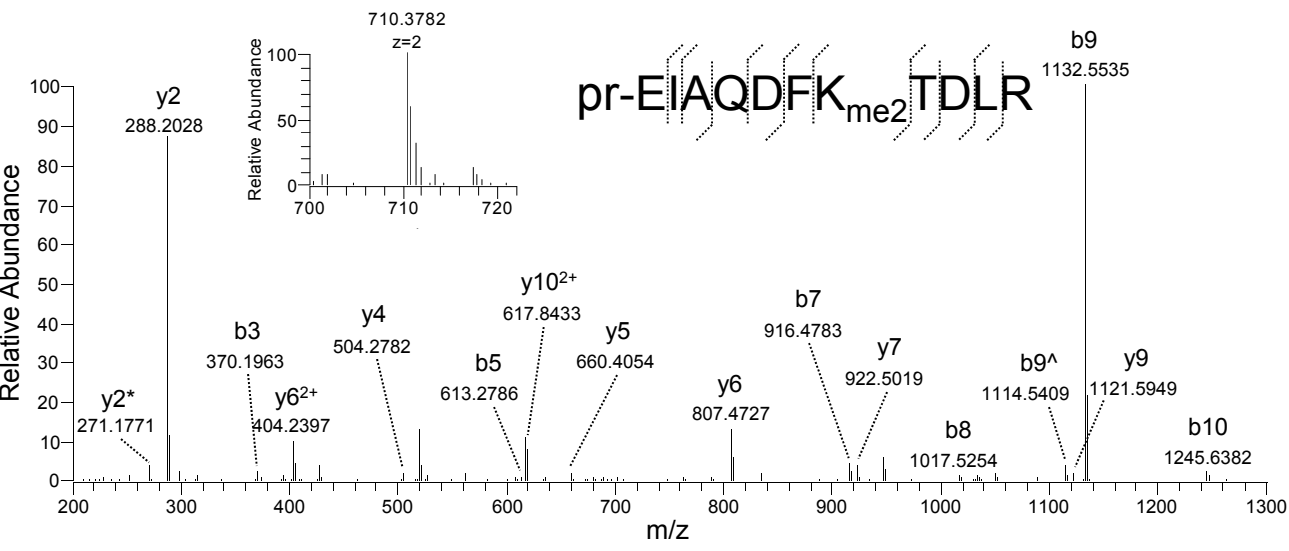

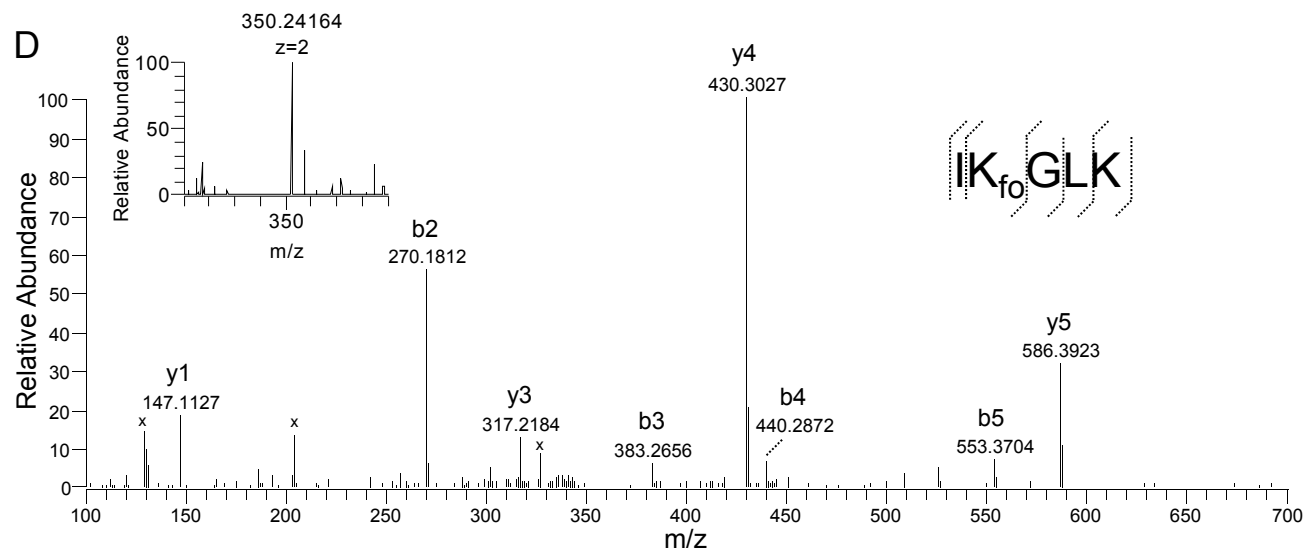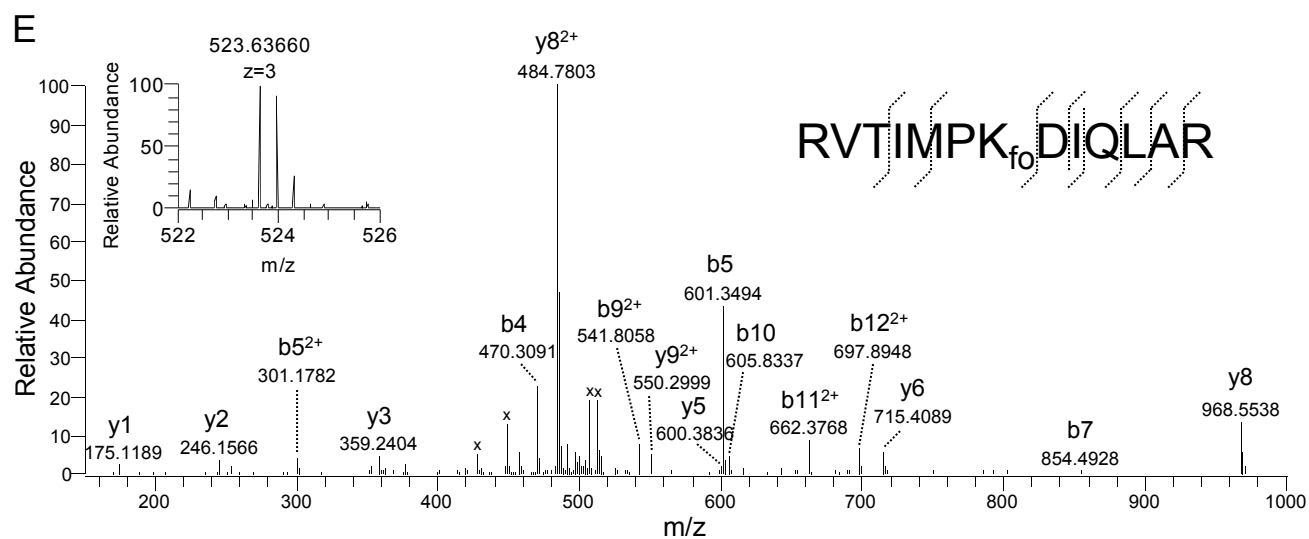

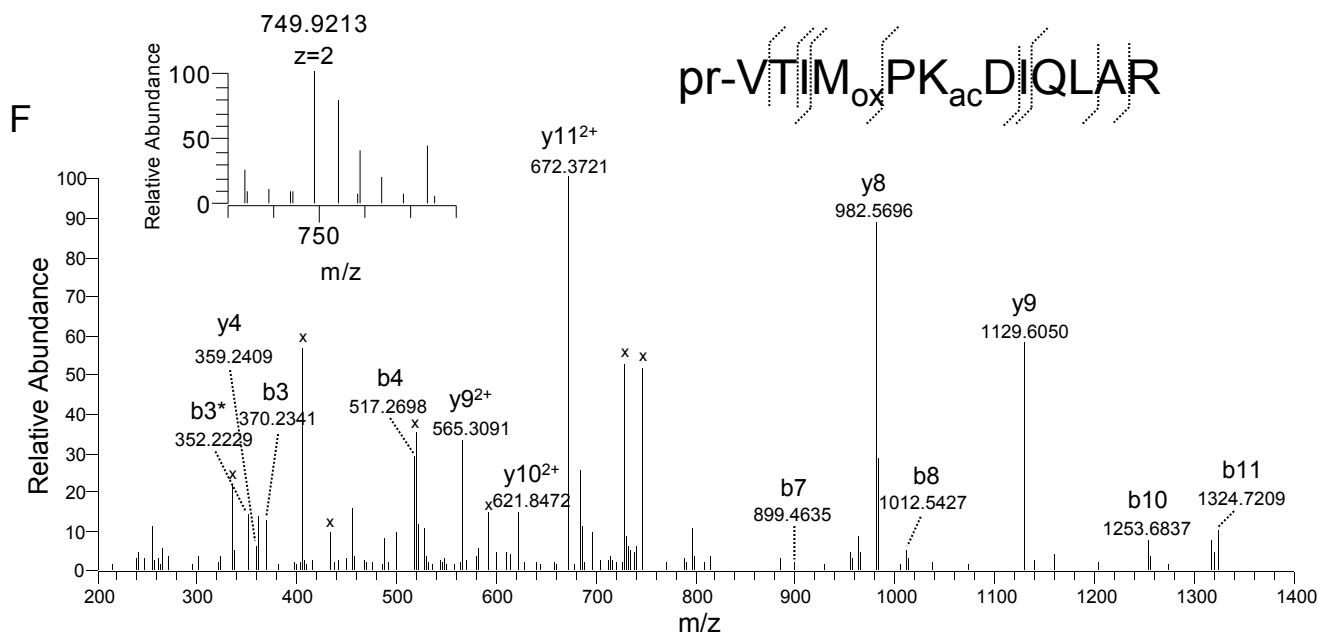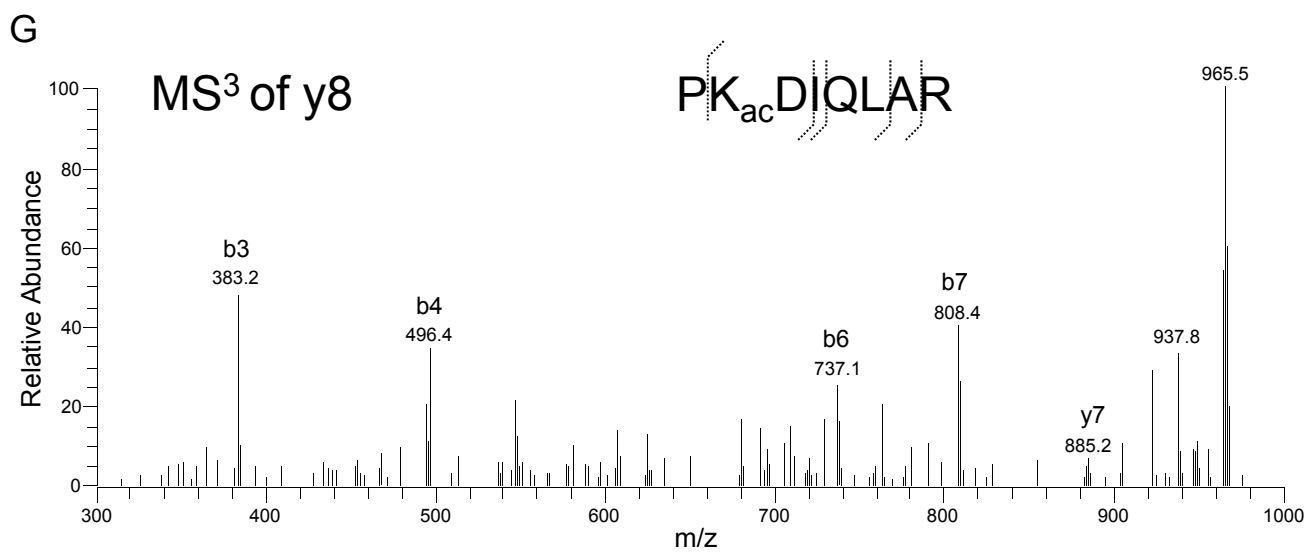

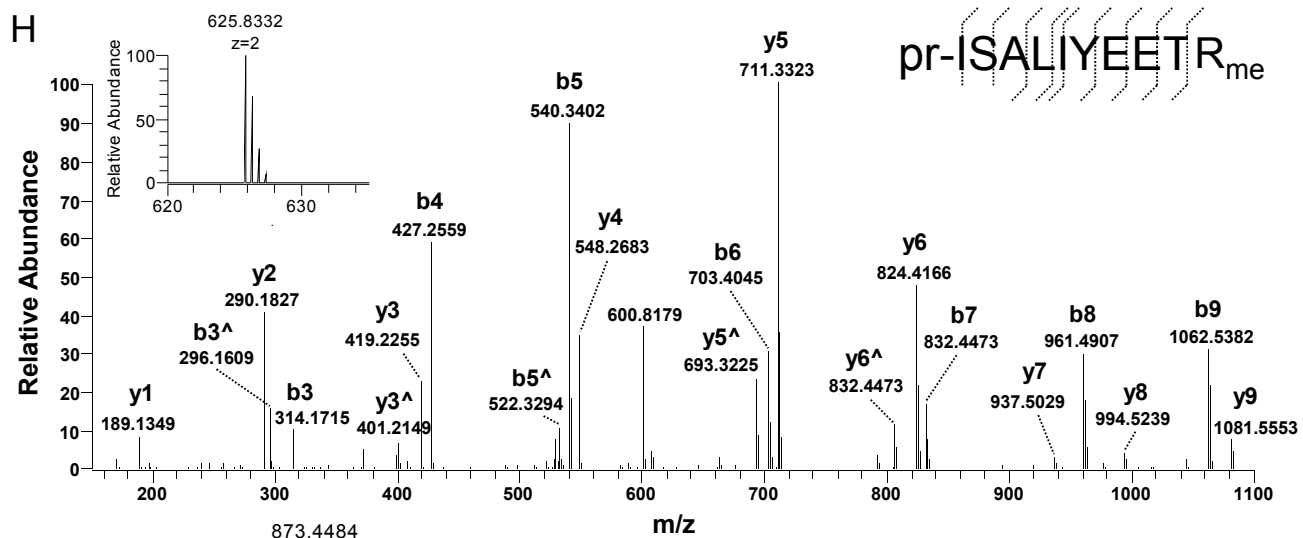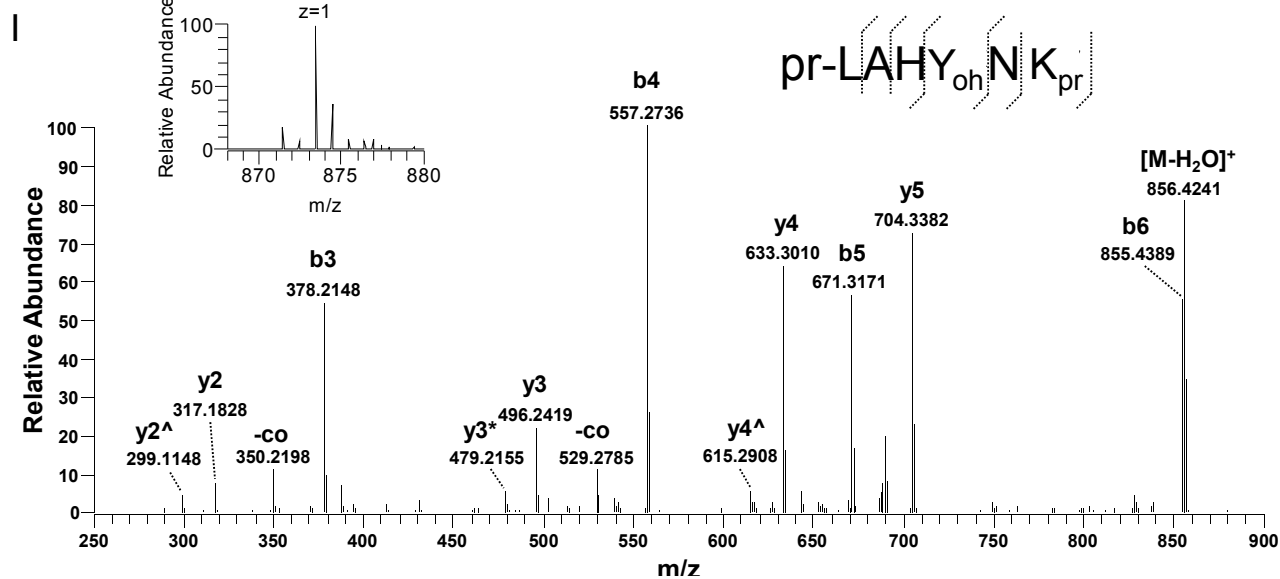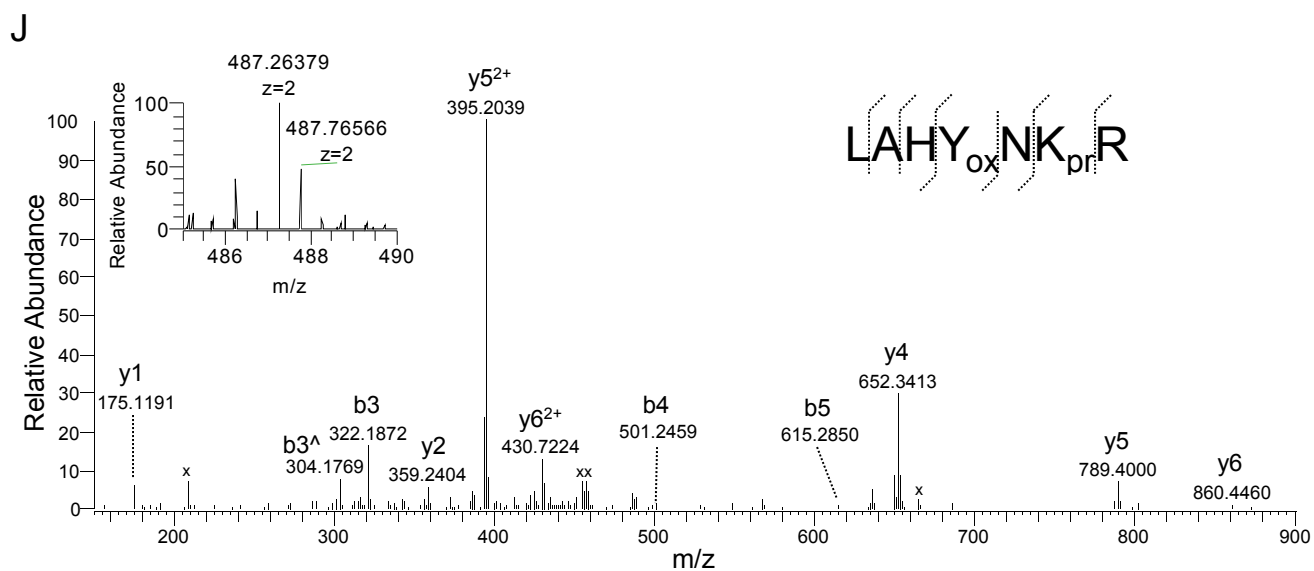

K

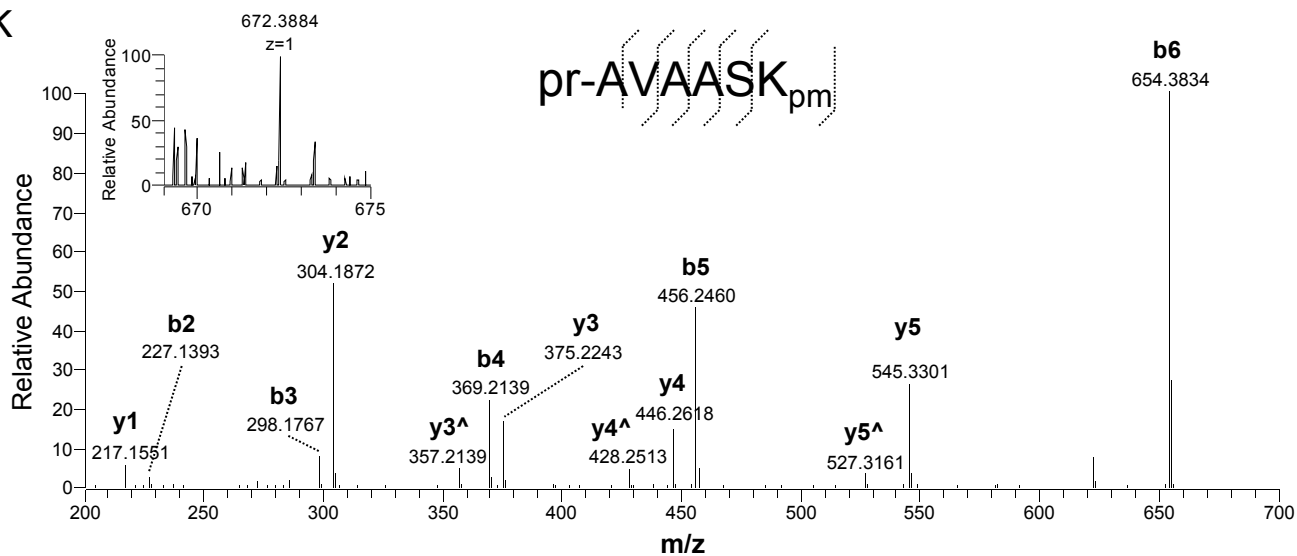

L

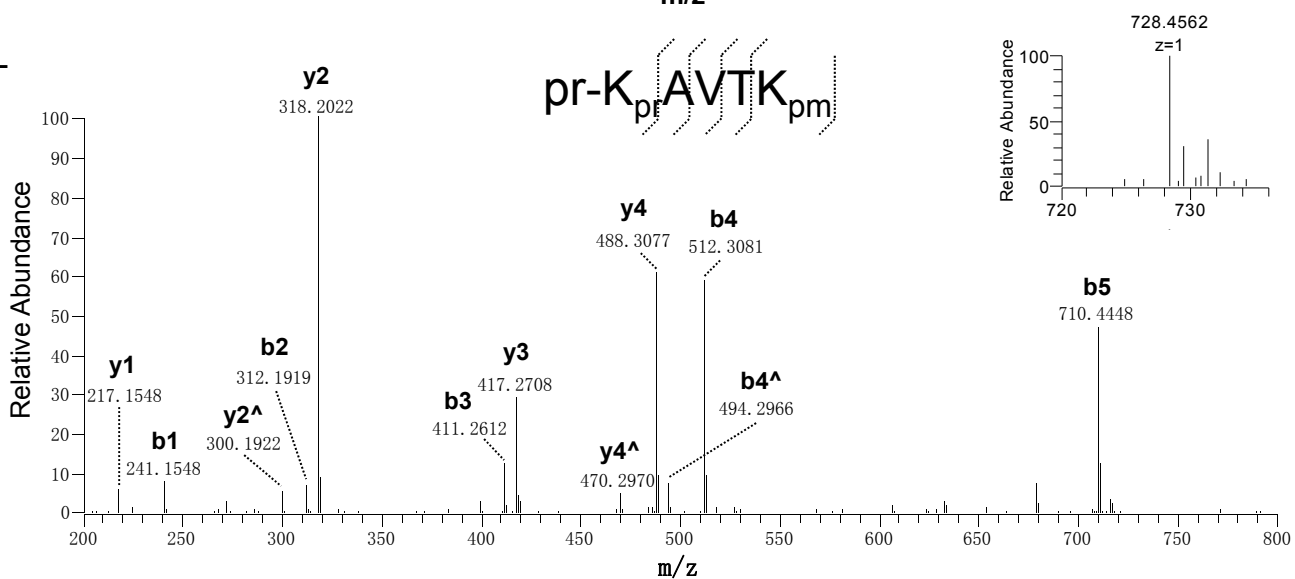

M

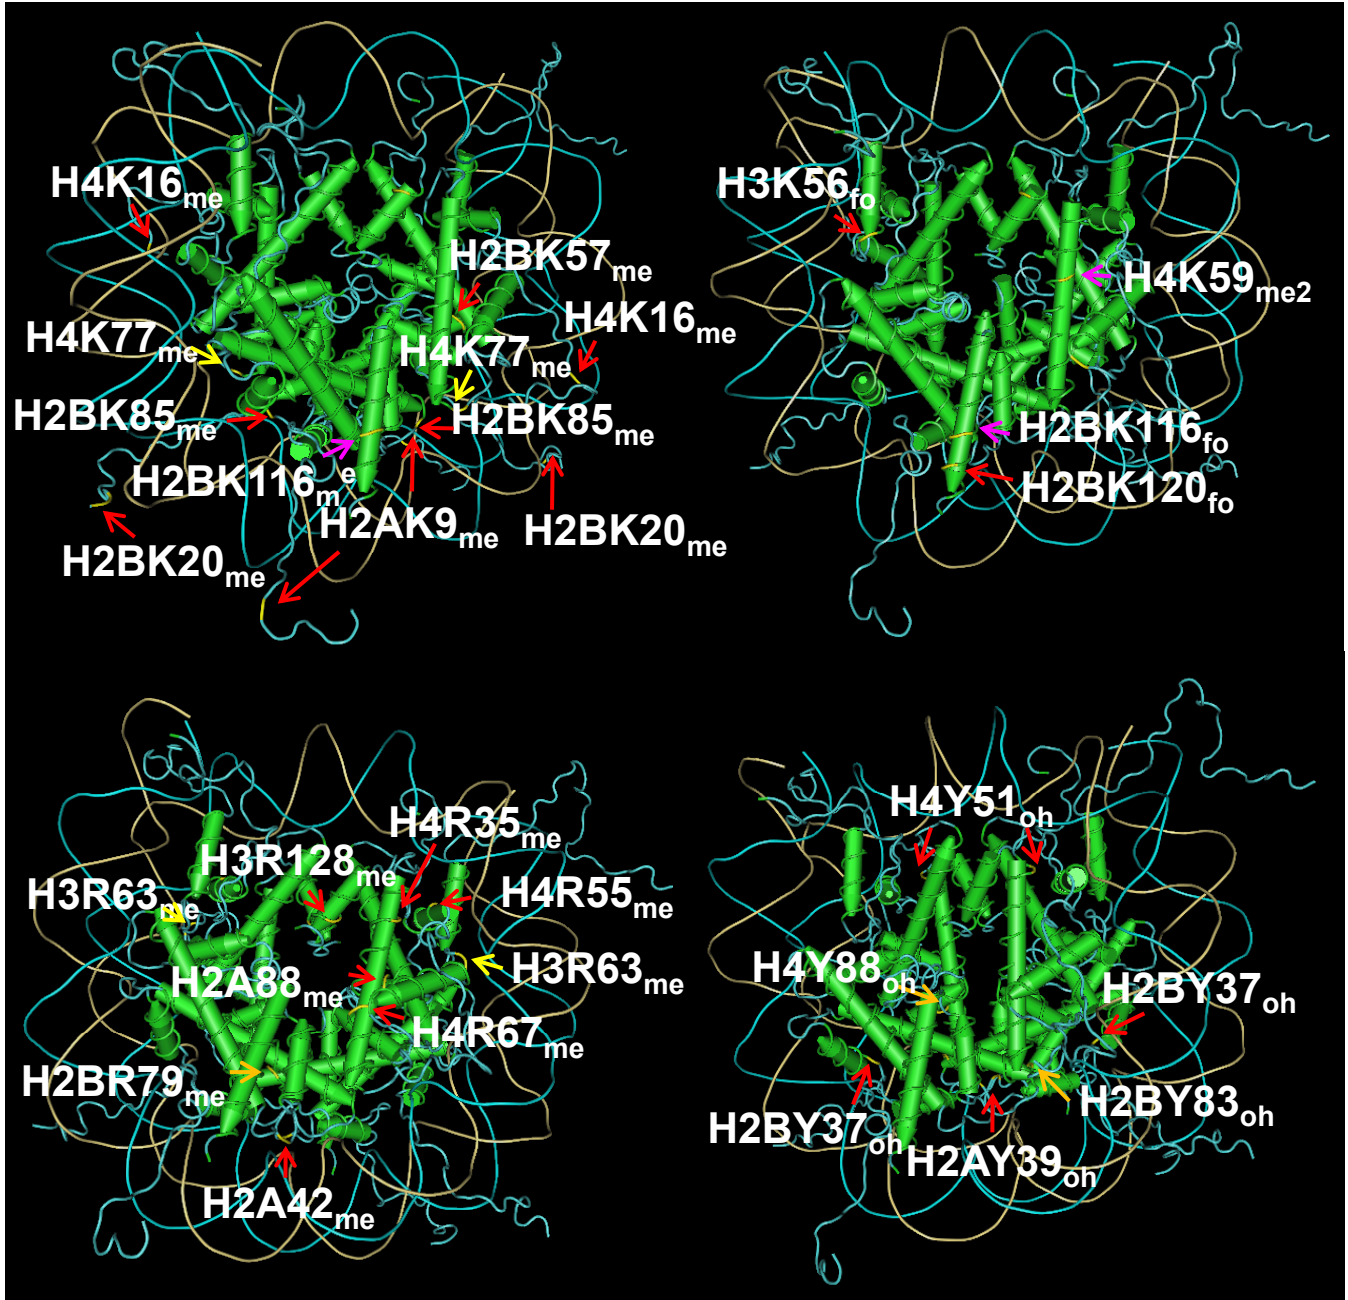

# Supplemental Figure2

A

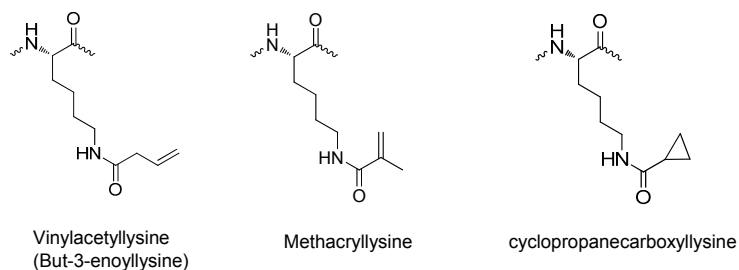

B

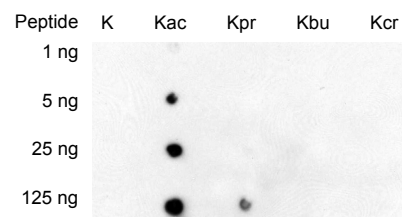

C

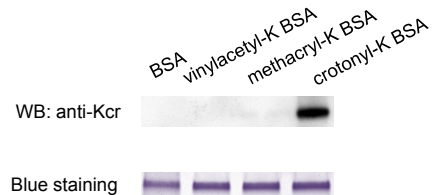

D

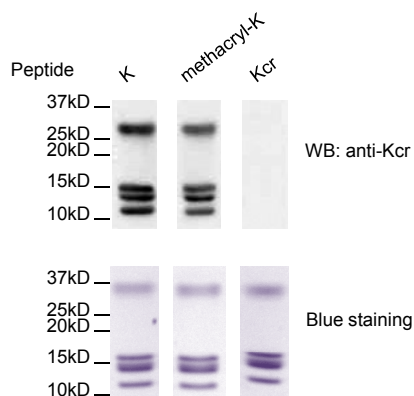

E

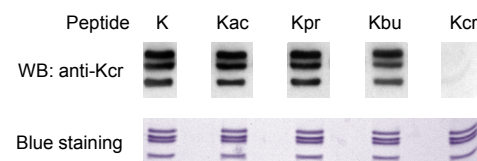

F

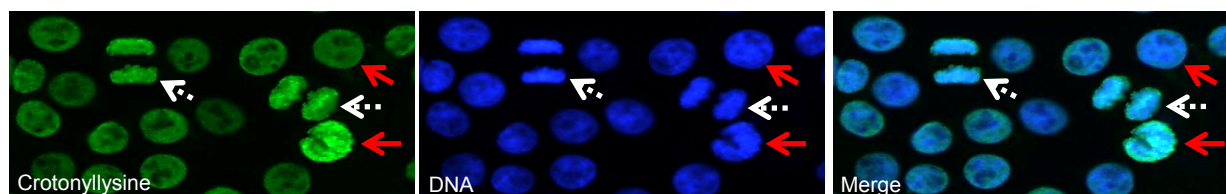

G

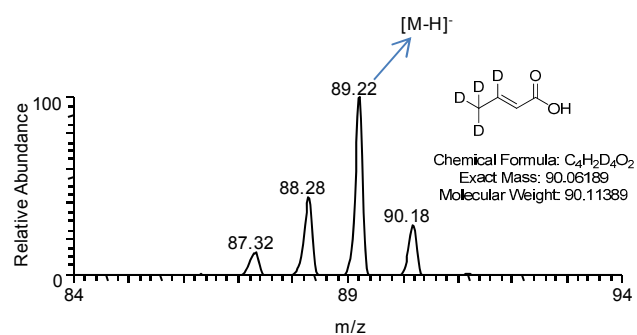

H

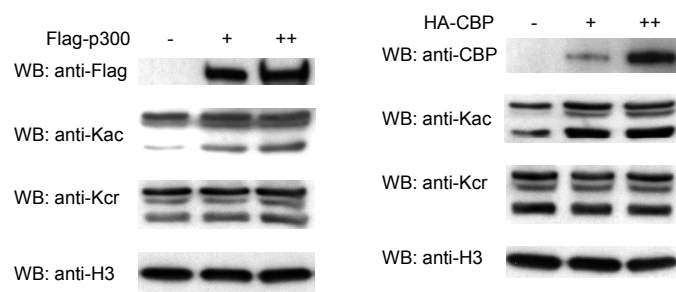

I

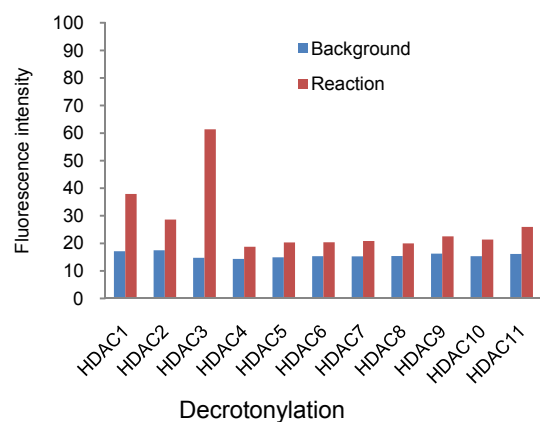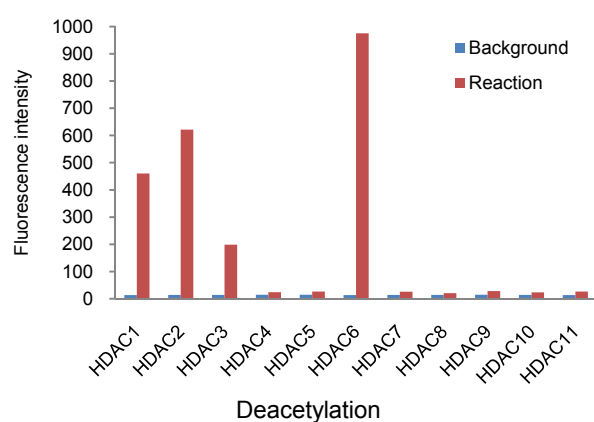

**Supplemental Figure3**

**A**

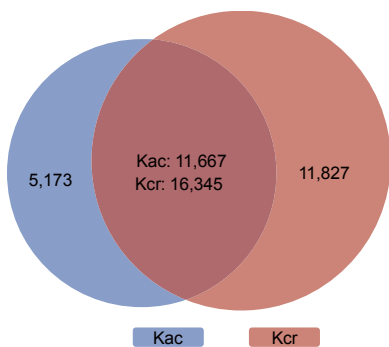

**B**

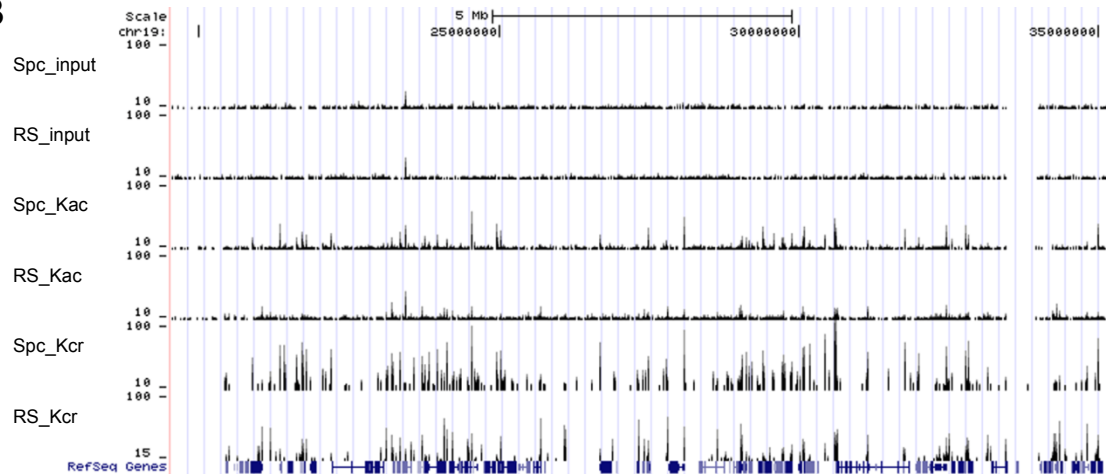

**C**

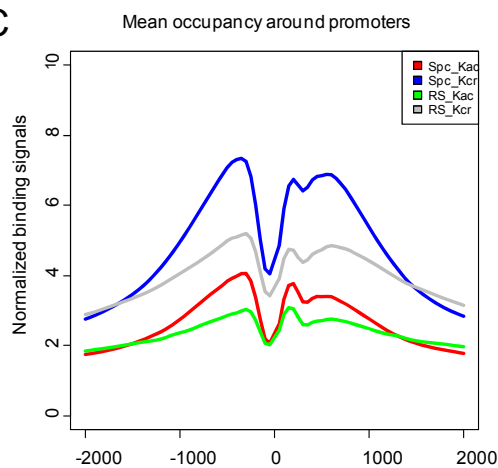

**D**

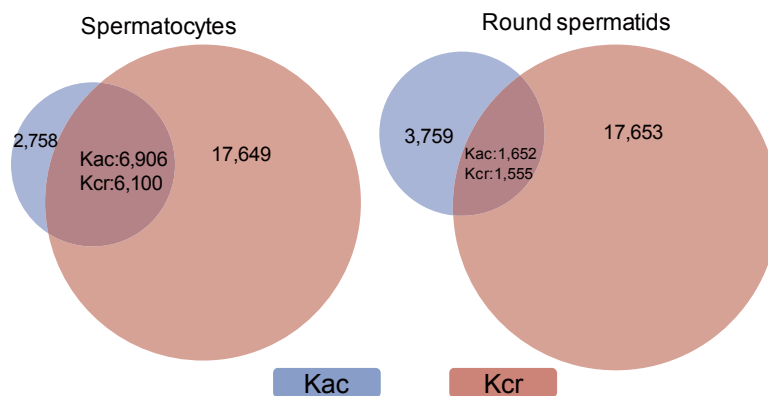

**E**

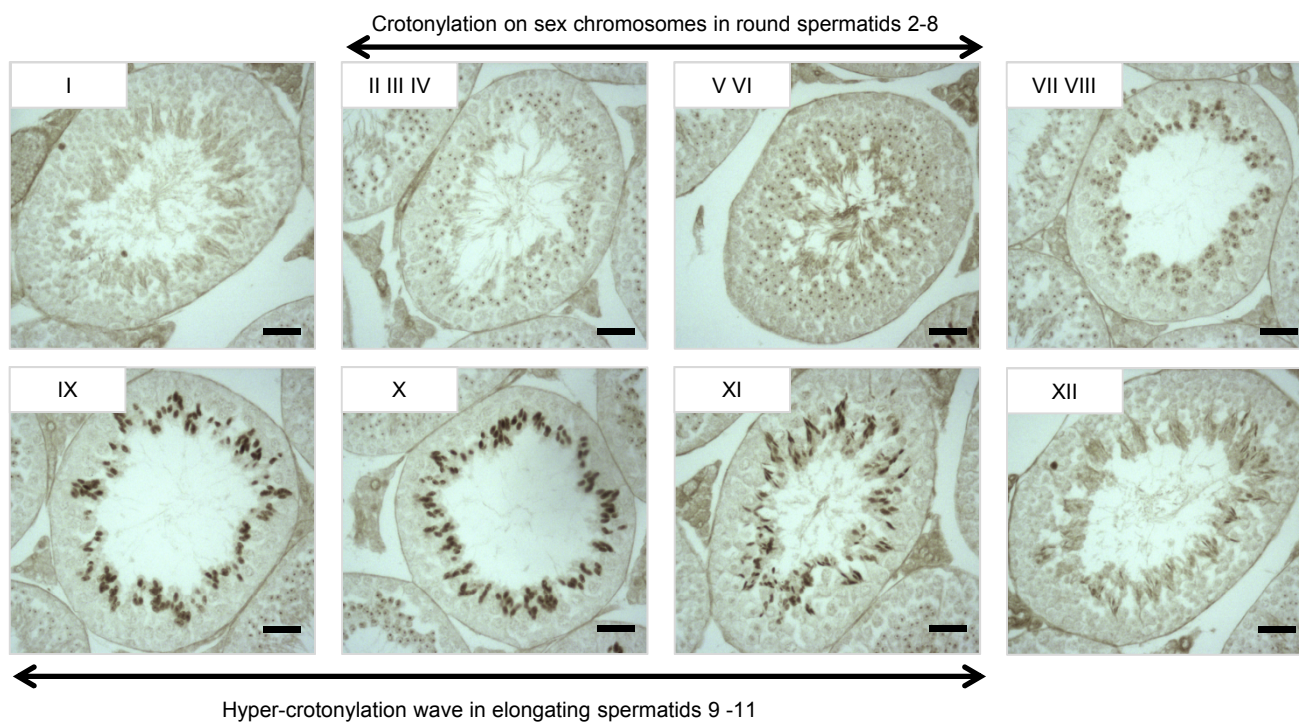

**F**

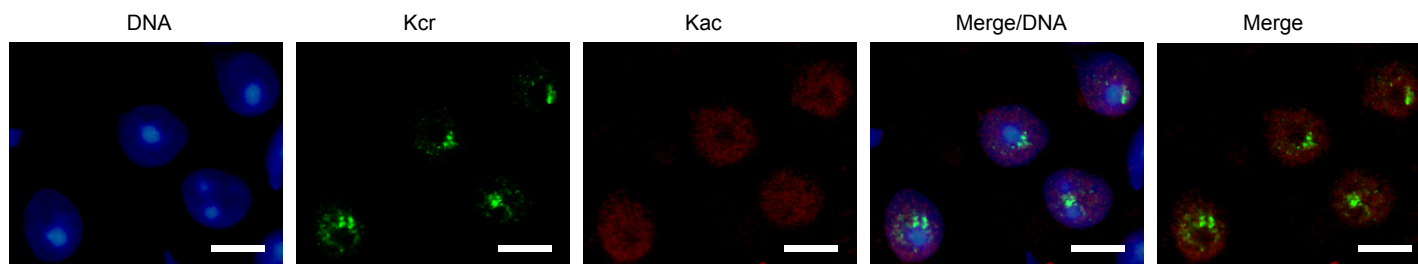

K<sub>cr</sub>GNYAER

H2AK36

MS/MS Fragmentation of **KGNYAER**  
Found in **IPI00081836**, Tax\_Id=9606 Gene\_Symbol=HIST1H2AM;HIST1H2AL;HIST1H2AJ;  
Match to Query 4126: 904.438574 from(453.226563,2+)

Click mouse within plot area to zoom in by factor of two about that point  
Or,   to  Da

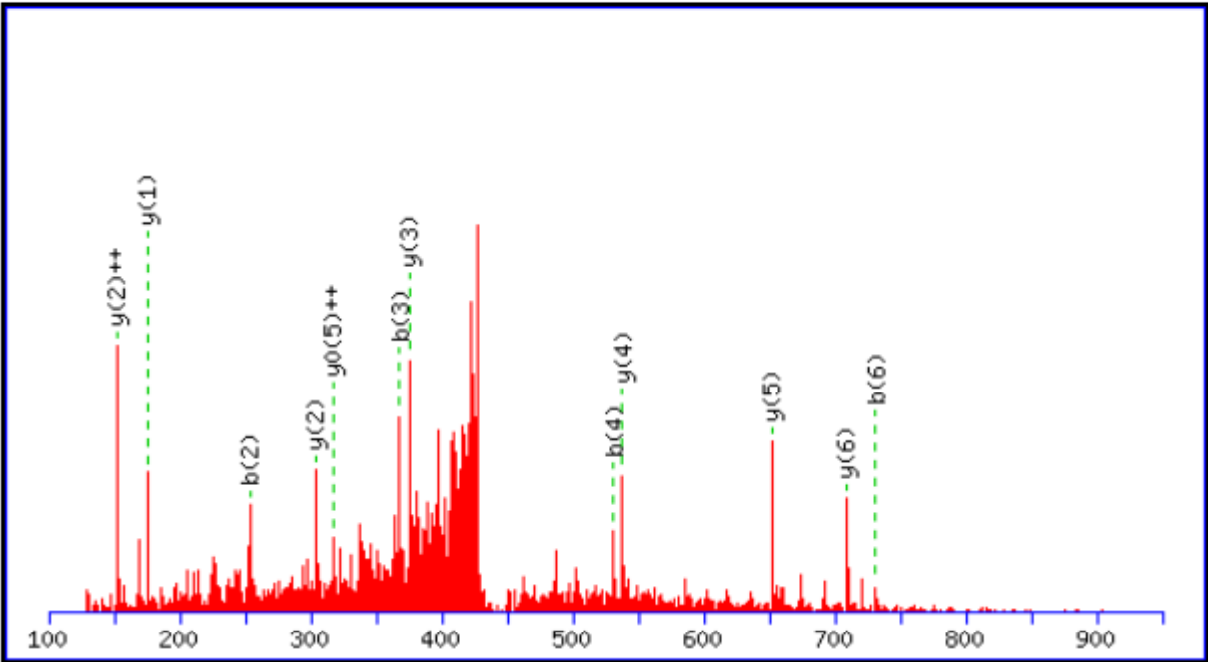

Monoisotopic mass of neutral peptide Mr(calc): 904.44  
Variable modifications:  
K1 : Crotonoyl (K)  
Ions Score: 30 Expect: 8.4

| # | b      | b <sup>++</sup> | b <sup>*</sup> | b <sup>*++</sup> | b <sup>0</sup> | b <sup>0++</sup> | Seq. | y      | y <sup>++</sup> | y <sup>*</sup> | y <sup>*++</sup> | y <sup>0</sup> | y <sup>0++</sup> | # |
|---|--------|-----------------|----------------|------------------|----------------|------------------|------|--------|-----------------|----------------|------------------|----------------|------------------|---|
| 1 | 197.13 | 99.07           | 180.10         | 90.55            |                |                  | K    |        |                 |                |                  |                |                  | 7 |
| 2 | 254.15 | 127.58          | 237.12         | 119.07           |                |                  | G    | 709.33 | 355.17          | 692.30         | 346.65           | 691.32         | 346.16           | 6 |
| 3 | 368.19 | 184.60          | 351.17         | 176.09           |                |                  | N    | 652.30 | 326.66          | 635.28         | 318.14           | 634.29         | 317.65           | 5 |
| 4 | 531.26 | 266.13          | 514.23         | 257.62           |                |                  | Y    | 538.26 | 269.63          | 521.24         | 261.12           | 520.25         | 260.63           | 4 |
| 5 | 602.29 | 301.65          | 585.27         | 293.14           |                |                  | A    | 375.20 | 188.10          | 358.17         | 179.59           | 357.19         | 179.10           | 3 |
| 6 | 731.34 | 366.17          | 714.31         | 357.66           | 713.33         | 357.17           | E    | 304.16 | 152.58          | 287.13         | 144.07           | 286.15         | 143.58           | 2 |
| 7 |        |                 |                |                  |                |                  | R    | 175.12 | 88.06           | 158.09         | 79.55            |                |                  | 1 |

VTIAQGGVLPNIQAVLLPK<sub>cr</sub>K

H2A K118

MS/MS Fragmentation of **VTIAQGGVLPNIQAVLLPKK**Found in **IPI00081836**, Tax\_Id=9606 Gene\_Symbol=HIST1H2AM;HIST1H2AL;HIST1H2AJ;

Match to Query 16386: 2126.285301 from(709.769043,3+)

Click mouse within plot area to zoom in by factor of two about that point

Or,   to  Da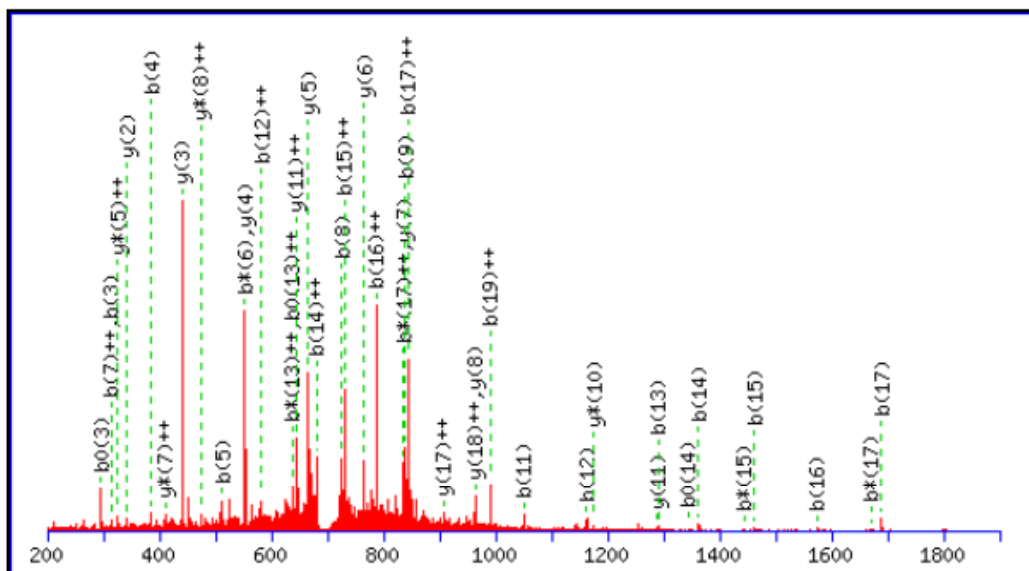

Monoisotopic mass of neutral peptide Mr(calc): 2126.28

Variable modifications:

K19 : Crotonoyl (K)

Ions Score: 59 Expect: 0.037

| #  | b       | b <sup>++</sup> | b <sup>*</sup> | b <sup>+++</sup> | b <sup>0</sup> | b <sup>0++</sup> | Seq. | y       | y <sup>++</sup> | y <sup>*</sup> | y <sup>+++</sup> | y <sup>0</sup> | y <sup>0++</sup> | #  |
|----|---------|-----------------|----------------|------------------|----------------|------------------|------|---------|-----------------|----------------|------------------|----------------|------------------|----|
| 1  | 100.08  | 50.54           |                |                  |                |                  | V    |         |                 |                |                  |                |                  | 20 |
| 2  | 201.12  | 101.07          |                |                  | 183.11         | 92.06            | T    | 2028.22 | 1014.61         | 2011.19        | 1006.10          | 2010.21        | 1005.61          | 19 |
| 3  | 314.21  | 157.61          |                |                  | 296.20         | 148.60           | I    | 1927.17 | 964.09          | 1910.15        | 955.58           |                |                  | 18 |
| 4  | 385.24  | 193.13          |                |                  | 367.23         | 184.12           | A    | 1814.09 | 907.55          | 1797.06        | 899.04           |                |                  | 17 |
| 5  | 513.30  | 257.16          | 496.28         | 248.64           | 495.29         | 248.15           | Q    | 1743.05 | 872.03          | 1726.03        | 863.52           |                |                  | 16 |
| 6  | 570.32  | 285.67          | 553.30         | 277.15           | 552.31         | 276.66           | G    | 1614.99 | 808.00          | 1597.97        | 799.49           |                |                  | 15 |
| 7  | 627.35  | 314.18          | 610.32         | 305.66           | 609.34         | 305.17           | G    | 1557.97 | 779.49          | 1540.95        | 770.98           |                |                  | 14 |
| 8  | 726.41  | 363.71          | 709.39         | 355.20           | 708.40         | 354.71           | V    | 1500.95 | 750.98          | 1483.92        | 742.47           |                |                  | 13 |
| 9  | 839.50  | 420.25          | 822.47         | 411.74           | 821.49         | 411.25           | L    | 1401.88 | 701.45          | 1384.86        | 692.93           |                |                  | 12 |
| 10 | 936.55  | 468.78          | 919.52         | 460.27           | 918.54         | 459.77           | P    | 1288.80 | 644.90          | 1271.77        | 636.39           |                |                  | 11 |
| 11 | 1050.59 | 525.80          | 1033.57        | 517.29           | 1032.58        | 516.80           | N    | 1191.75 | 596.38          | 1174.72        | 587.86           |                |                  | 10 |
| 12 | 1163.68 | 582.34          | 1146.65        | 573.83           | 1145.67        | 573.34           | I    | 1077.70 | 539.36          | 1060.68        | 530.84           |                |                  | 9  |
| 13 | 1291.74 | 646.37          | 1274.71        | 637.86           | 1273.73        | 637.37           | Q    | 964.62  | 482.81          | 947.59         | 474.30           |                |                  | 8  |
| 14 | 1362.77 | 681.89          | 1345.75        | 673.38           | 1344.76        | 672.89           | A    | 836.56  | 418.78          | 819.53         | 410.27           |                |                  | 7  |
| 15 | 1461.84 | 731.42          | 1444.82        | 722.91           | 1443.83        | 722.42           | V    | 765.52  | 383.27          | 748.50         | 374.75           |                |                  | 6  |
| 16 | 1574.93 | 787.97          | 1557.90        | 779.45           | 1556.92        | 778.96           | L    | 666.45  | 333.73          | 649.43         | 325.22           |                |                  | 5  |
| 17 | 1688.01 | 844.51          | 1670.98        | 836.00           | 1670.00        | 835.50           | L    | 553.37  | 277.19          | 536.34         | 268.68           |                |                  | 4  |
| 18 | 1785.06 | 893.04          | 1768.04        | 884.52           | 1767.05        | 884.03           | P    | 440.29  | 220.65          | 423.26         | 212.13           |                |                  | 3  |
| 19 | 1981.18 | 991.10          | 1964.16        | 982.58           | 1963.17        | 982.09           | K    | 343.23  | 172.12          | 326.21         | 163.61           |                |                  | 2  |
| 20 |         |                 |                |                  |                |                  | K    | 147.11  | 74.06           | 130.09         | 65.55            |                |                  | 1  |

# K<sub>pr+cr</sub>TESHHK<sub>pr</sub>\* H2AK119

\*Note: from propionylated sample.

MS/MS Fragmentation of **KTESHHK**

Found in **gi|10645195**, H2A histone family, member A [Homo sapiens]

Match to Query 17410: 1045.521764 from(523.768158,2+)

Click mouse within plot area to zoom in by factor of two about that point

Or,   to  Da

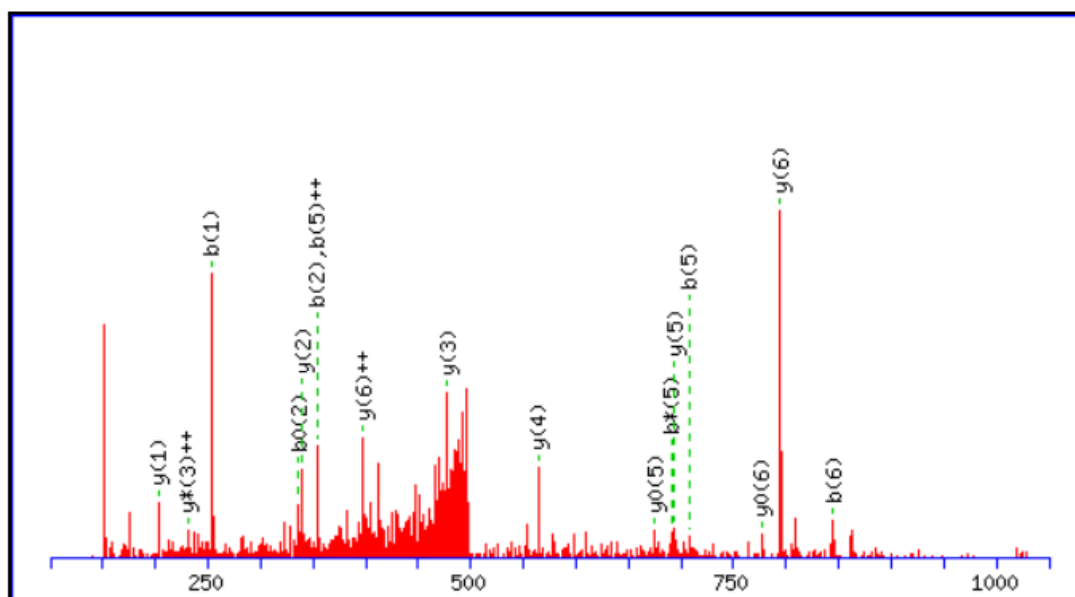

Monoisotopic mass of neutral peptide Mr(calc): 1045.52

Fixed modifications: Propionyl (N-term)

Variable modifications:

K1 : Crotonoyl (K)

K7 : Propionyl (K)

Ions Score: 28 Expect: 0.22

| # | b      | b <sup>++</sup> | b*     | b* <sup>++</sup> | b <sup>0</sup> | b <sup>0++</sup> | Seq. | y      | y <sup>++</sup> | y*     | y* <sup>++</sup> | y <sup>0</sup> | y <sup>0++</sup> | # |
|---|--------|-----------------|--------|------------------|----------------|------------------|------|--------|-----------------|--------|------------------|----------------|------------------|---|
| 1 | 253.15 | 127.08          | 236.13 | 118.57           |                |                  | K    |        |                 |        |                  |                |                  | 7 |
| 2 | 354.20 | 177.60          | 337.18 | 169.09           | 336.19         | 168.60           | T    | 794.38 | 397.69          | 777.35 | 389.18           | 776.37         | 388.69           | 6 |
| 3 | 483.24 | 242.13          | 466.22 | 233.61           | 465.23         | 233.12           | E    | 693.33 | 347.17          | 676.30 | 338.66           | 675.32         | 338.16           | 5 |
| 4 | 570.28 | 285.64          | 553.25 | 277.13           | 552.27         | 276.64           | S    | 564.29 | 282.65          | 547.26 | 274.13           | 546.28         | 273.64           | 4 |
| 5 | 707.34 | 354.17          | 690.31 | 345.66           | 689.33         | 345.17           | H    | 477.26 | 239.13          | 460.23 | 230.62           |                |                  | 3 |
| 6 | 844.39 | 422.70          | 827.37 | 414.19           | 826.38         | 413.70           | H    | 340.20 | 170.60          | 323.17 | 162.09           |                |                  | 2 |
| 7 |        |                 |        |                  |                |                  | K    | 203.14 | 102.07          | 186.11 | 93.56            |                |                  | 1 |

KTESHHK<sub>cr</sub>AK

H2AK125

MS/MS Fragmentation of **KTESHHKAK**

Found in **IPI00081836**, Tax\_Id=9606 Gene\_Symbol=HIST1H2AM;HIST1H2AL;HIST1H2AJ

Match to Query 8958: 1132.596714 from(567.305633,2+)

Click mouse within plot area to zoom in by factor of two about that point

Or,   to  Da

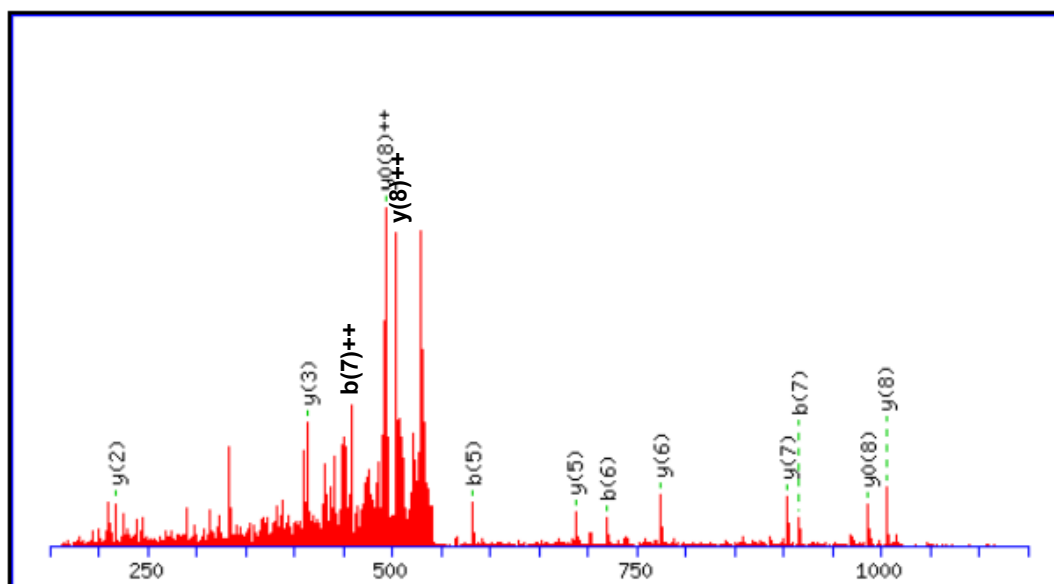

Monoisotopic mass of neutral peptide Mr(calc): 1132.60

Variable modifications:

K7 : Crotonoyl (K)

Ions Score: 36 Expect: 3.2

| # | b      | b <sup>++</sup> | b <sup>*</sup> | b <sup>*++</sup> | b <sup>0</sup> | b <sup>0++</sup> | Seq. | y       | y <sup>++</sup> | y <sup>*</sup> | y <sup>*++</sup> | y <sup>0</sup> | y <sup>0++</sup> | # |
|---|--------|-----------------|----------------|------------------|----------------|------------------|------|---------|-----------------|----------------|------------------|----------------|------------------|---|
| 1 | 129.10 | 65.05           | 112.08         | 56.54            |                |                  | K    |         |                 |                |                  |                |                  | 9 |
| 2 | 230.15 | 115.58          | 213.12         | 107.07           | 212.14         | 106.57           | T    | 1005.51 | 503.26          | 988.48         | 494.75           | 987.50         | 494.25           | 8 |
| 3 | 359.19 | 180.10          | 342.17         | 171.59           | 341.18         | 171.09           | E    | 904.46  | 452.74          | 887.44         | 444.22           | 886.45         | 443.73           | 7 |
| 4 | 446.22 | 223.62          | 429.20         | 215.10           | 428.21         | 214.61           | S    | 775.42  | 388.21          | 758.39         | 379.70           | 757.41         | 379.21           | 6 |
| 5 | 583.28 | 292.15          | 566.26         | 283.63           | 565.27         | 283.14           | H    | 688.39  | 344.70          | 671.36         | 336.18           |                |                  | 5 |
| 6 | 720.34 | 360.67          | 703.32         | 352.16           | 702.33         | 351.67           | H    | 551.33  | 276.17          | 534.30         | 267.66           |                |                  | 4 |
| 7 | 916.46 | 458.74          | 899.44         | 450.22           | 898.45         | 449.73           | K    | 414.27  | 207.64          | 397.24         | 199.13           |                |                  | 3 |
| 8 | 987.50 | 494.25          | 970.47         | 485.74           | 969.49         | 485.25           | A    | 218.15  | 109.58          | 201.12         | 101.07           |                |                  | 2 |
| 9 |        |                 |                |                  |                |                  | K    | 147.11  | 74.06           | 130.09         | 65.55            |                |                  | 1 |

# PEPAK<sub>cr</sub>SAPAPK H2BK5

MS/MS Fragmentation of **PEPAKSAPAPK**

Found in **gi|1568551**, histone H2B [Homo sapiens]

Match to Query 13515: 1159.625764 from(580.820158,2+)

Click mouse within plot area to zoom in by factor of two about that point

Or,   to  Da

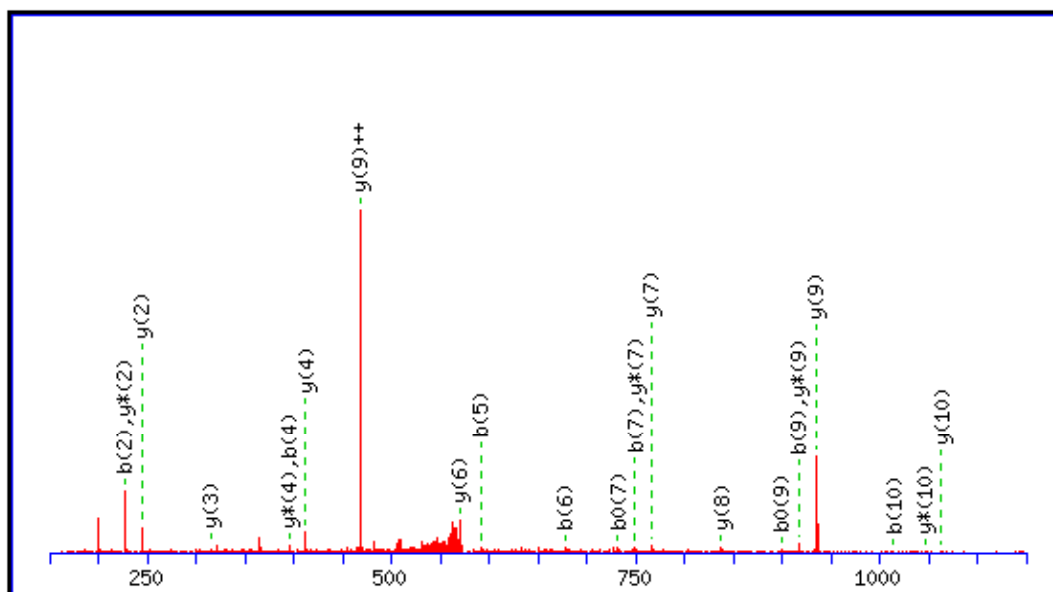

**Monoisotopic mass of neutral peptide Mr(calc):** 1159.62

**Variable modifications:**

**K5** : Crotonoyl (K)

**Ions Score:** 50 **Expect:** 0.0018

**Matches (Bold Red):** 23/100 fragment ions using 49 most intense peaks

| #  | b              | b <sup>++</sup> | b <sup>*</sup> | b <sup>++</sup> * | b <sup>0</sup> | b <sup>0++</sup> | Seq. | y              | y <sup>++</sup> | y <sup>*</sup> | y <sup>++</sup> * | y <sup>0</sup> | y <sup>0++</sup> | #  |
|----|----------------|-----------------|----------------|-------------------|----------------|------------------|------|----------------|-----------------|----------------|-------------------|----------------|------------------|----|
| 1  | 98.06          | 49.53           |                |                   |                |                  | P    |                |                 |                |                   |                |                  | 11 |
| 2  | <b>227.10</b>  | 114.05          |                |                   | 209.09         | 105.05           | E    | <b>1063.58</b> | 532.29          | <b>1046.55</b> | 523.78            | 1045.57        | 523.29           | 10 |
| 3  | 324.16         | 162.58          |                |                   | 306.14         | 153.58           | P    | <b>934.54</b>  | <b>467.77</b>   | <b>917.51</b>  | 459.26            | 916.53         | 458.77           | 9  |
| 4  | <b>395.19</b>  | 198.10          |                |                   | 377.18         | 189.09           | A    | <b>837.48</b>  | 419.25          | 820.46         | 410.73            | 819.47         | 410.24           | 8  |
| 5  | <b>591.31</b>  | 296.16          | 574.29         | 287.65            | 573.30         | 287.16           | K    | <b>766.45</b>  | 383.73          | <b>749.42</b>  | 375.21            | 748.44         | 374.72           | 7  |
| 6  | <b>678.35</b>  | 339.68          | 661.32         | 331.16            | 660.34         | 330.67           | S    | <b>570.32</b>  | 285.67          | 553.30         | 277.15            | 552.31         | 276.66           | 6  |
| 7  | <b>749.38</b>  | 375.20          | 732.36         | 366.68            | <b>731.37</b>  | 366.19           | A    | 483.29         | 242.15          | 466.27         | 233.64            |                |                  | 5  |
| 8  | 846.44         | 423.72          | 829.41         | 415.21            | 828.43         | 414.72           | P    | <b>412.26</b>  | 206.63          | <b>395.23</b>  | 198.12            |                |                  | 4  |
| 9  | <b>917.47</b>  | 459.24          | 900.45         | 450.73            | <b>899.46</b>  | 450.23           | A    | <b>315.20</b>  | 158.10          | 298.18         | 149.59            |                |                  | 3  |
| 10 | <b>1014.53</b> | 507.77          | 997.50         | 499.25            | 996.51         | 498.76           | P    | <b>244.17</b>  | 122.59          | <b>227.14</b>  | 114.07            |                |                  | 2  |
| 11 |                |                 |                |                   |                |                  | K    | 147.11         | 74.06           | 130.09         | 65.55             |                |                  | 1  |

PEPAK<sub>ac</sub>SAPAPK<sub>cr</sub>K<sub>ac</sub>GSK

H2BK11

MS/MS Fragmentation of **PEPAKSAPAPKKGSK**Found in **gi|21396484**, histone H2B type 1-C/E/F/G/I [Homo sapiens]

Match to Query 16780: 1643.889314 from(822.951933,2+)

Click mouse within plot area to zoom in by factor of two about that point

Or,   to  Da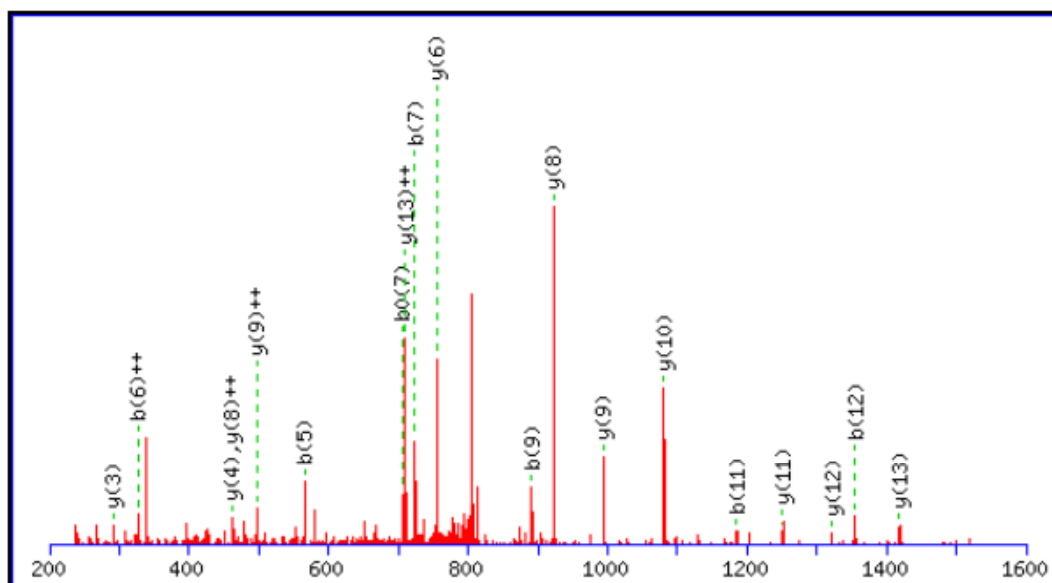

Monoisotopic mass of neutral peptide Mr(calc): 1643.89

Variable modifications:

K5 : Acetyl (K)

K11 : Crotonoyl (K)

K12 : Acetyl (K)

Ions Score: 46 Expect: 0.00011

| #  | b       | b <sup>++</sup> | b <sup>+</sup> | b <sup>++</sup> | b <sup>0</sup> | b <sup>0++</sup> | Seq. | y       | y <sup>++</sup> | y <sup>+</sup> | y <sup>++</sup> | y <sup>0</sup> | y <sup>0++</sup> | #  |
|----|---------|-----------------|----------------|-----------------|----------------|------------------|------|---------|-----------------|----------------|-----------------|----------------|------------------|----|
| 1  | 98.06   | 49.53           |                |                 |                |                  | P    |         |                 |                |                 |                |                  | 15 |
| 2  | 227.10  | 114.05          |                |                 | 209.09         | 105.05           | E    | 1547.84 | 774.43          | 1530.82        | 765.91          | 1529.83        | 765.42           | 14 |
| 3  | 324.16  | 162.58          |                |                 | 306.14         | 153.58           | P    | 1418.80 | 709.90          | 1401.77        | 701.39          | 1400.79        | 700.90           | 13 |
| 4  | 395.19  | 198.10          |                |                 | 377.18         | 189.09           | A    | 1321.75 | 661.38          | 1304.72        | 652.86          | 1303.74        | 652.37           | 12 |
| 5  | 565.30  | 283.15          | 548.27         | 274.64          | 547.29         | 274.15           | K    | 1250.71 | 625.86          | 1233.68        | 617.35          | 1232.70        | 616.85           | 11 |
| 6  | 652.33  | 326.67          | 635.30         | 318.16          | 634.32         | 317.66           | S    | 1080.60 | 540.81          | 1063.58        | 532.29          | 1062.59        | 531.80           | 10 |
| 7  | 723.37  | 362.19          | 706.34         | 353.67          | 705.36         | 353.18           | A    | 993.57  | 497.29          | 976.55         | 488.78          | 975.56         | 488.28           | 9  |
| 8  | 820.42  | 410.71          | 803.39         | 402.20          | 802.41         | 401.71           | P    | 922.54  | 461.77          | 905.51         | 453.26          | 904.53         | 452.77           | 8  |
| 9  | 891.46  | 446.23          | 874.43         | 437.72          | 873.45         | 437.23           | A    | 825.48  | 413.25          | 808.46         | 404.73          | 807.47         | 404.24           | 7  |
| 10 | 988.51  | 494.76          | 971.48         | 486.25          | 970.50         | 485.75           | P    | 754.45  | 377.73          | 737.42         | 369.21          | 736.44         | 368.72           | 6  |
| 11 | 1184.63 | 592.82          | 1167.60        | 584.31          | 1166.62        | 583.81           | K    | 657.39  | 329.20          | 640.37         | 320.69          | 639.38         | 320.19           | 5  |
| 12 | 1354.74 | 677.87          | 1337.71        | 669.36          | 1336.73        | 668.87           | K    | 461.27  | 231.14          | 444.25         | 222.63          | 443.26         | 222.13           | 4  |
| 13 | 1411.76 | 706.38          | 1394.73        | 697.87          | 1393.75        | 697.38           | G    | 291.17  | 146.09          | 274.14         | 137.57          | 273.16         | 137.08           | 3  |
| 14 | 1498.79 | 749.90          | 1481.76        | 741.39          | 1480.78        | 740.89           | S    | 234.14  | 117.58          | 217.12         | 109.06          | 216.13         | 108.57           | 2  |
| 15 |         |                 |                |                 |                |                  | K    | 147.11  | 74.06           | 130.09         | 65.55           |                |                  | 1  |

K<sub>cr</sub>GSK<sub>ac</sub>K<sub>ac</sub>AVTK<sub>ac</sub>AQK<sub>ac</sub>K

H2BK12

MS/MS Fragmentation of **KGSKKAVTKAQKK**

Found in **IPI00020101**, Tax\_Id=9606 Gene\_Symbol=HIST1H2BC;HIST1H2BI;HIST1H2B

Match to Query 16233: 1636.945224 from(819.479888,2+)

Click mouse within plot area to zoom in by factor of two about that point

Or,   to  Da

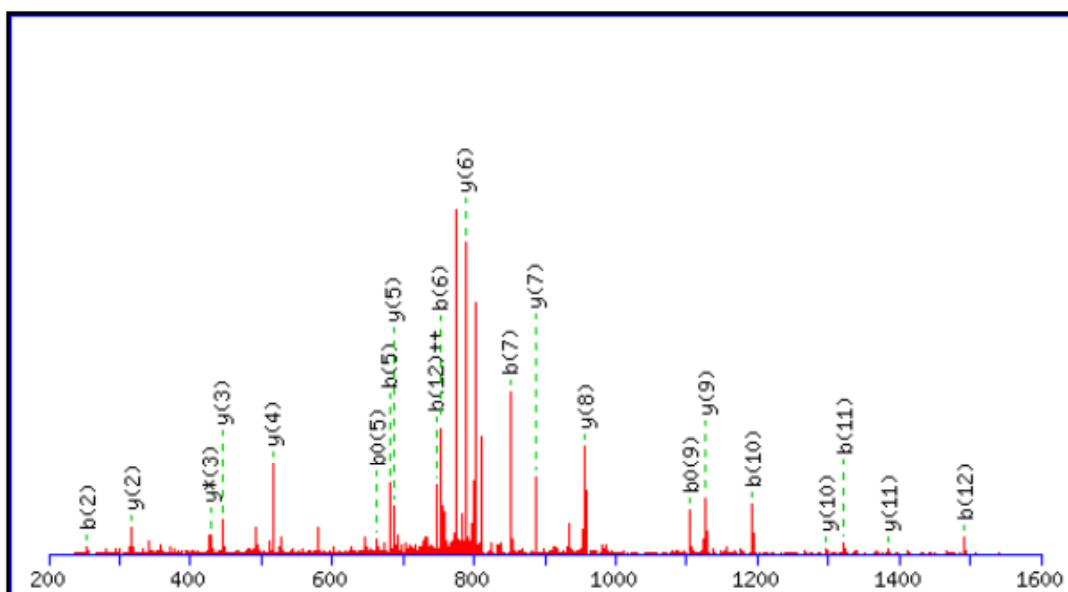

Monoisotopic mass of neutral peptide Mr(calc): 1636.95

Variable modifications:

K1 : Crotonoyl (K)

K4 : Acetyl (K)

K5 : Acetyl (K)

K9 : Acetyl (K)

K12 : Acetyl (K)

Ions Score: 75 Expect: 3e-006

| #  | b       | b <sup>++</sup> | b*      | b <sup>*++</sup> | b <sup>0</sup> | b <sup>0++</sup> | Seq. | y       | y <sup>++</sup> | y*      | y <sup>*++</sup> | y <sup>0</sup> | y <sup>0++</sup> | #  |
|----|---------|-----------------|---------|------------------|----------------|------------------|------|---------|-----------------|---------|------------------|----------------|------------------|----|
| 1  | 197.13  | 99.07           | 180.10  | 90.55            |                |                  | K    |         |                 |         |                  |                |                  | 13 |
| 2  | 254.15  | 127.58          | 237.12  | 119.07           |                |                  | G    | 1441.84 | 721.42          | 1424.81 | 712.91           | 1423.83        | 712.42           | 12 |
| 3  | 341.18  | 171.09          | 324.16  | 162.58           | 323.17         | 162.09           | S    | 1384.82 | 692.91          | 1367.79 | 684.40           | 1366.81        | 683.91           | 11 |
| 4  | 511.29  | 256.15          | 494.26  | 247.63           | 493.28         | 247.14           | K    | 1297.78 | 649.40          | 1280.76 | 640.88           | 1279.77        | 640.39           | 10 |
| 5  | 681.39  | 341.20          | 664.37  | 332.69           | 663.38         | 332.19           | K    | 1127.68 | 564.34          | 1110.65 | 555.83           | 1109.67        | 555.34           | 9  |
| 6  | 752.43  | 376.72          | 735.40  | 368.21           | 734.42         | 367.71           | A    | 957.57  | 479.29          | 940.55  | 470.78           | 939.56         | 470.28           | 8  |
| 7  | 851.50  | 426.25          | 834.47  | 417.74           | 833.49         | 417.25           | V    | 886.54  | 443.77          | 869.51  | 435.26           | 868.53         | 434.77           | 7  |
| 8  | 952.55  | 476.78          | 935.52  | 468.26           | 934.54         | 467.77           | T    | 787.47  | 394.24          | 770.44  | 385.72           | 769.46         | 385.23           | 6  |
| 9  | 1122.65 | 561.83          | 1105.63 | 553.32           | 1104.64        | 552.82           | K    | 686.42  | 343.71          | 669.39  | 335.20           |                |                  | 5  |
| 10 | 1193.69 | 597.35          | 1176.66 | 588.83           | 1175.68        | 588.34           | A    | 516.31  | 258.66          | 499.29  | 250.15           |                |                  | 4  |
| 11 | 1321.75 | 661.38          | 1304.72 | 652.86           | 1303.74        | 652.37           | Q    | 445.28  | 223.14          | 428.25  | 214.63           |                |                  | 3  |
| 12 | 1491.85 | 746.43          | 1474.83 | 737.92           | 1473.84        | 737.42           | K    | 317.22  | 159.11          | 300.19  | 150.60           |                |                  | 2  |
| 13 |         |                 |         |                  |                |                  | K    | 147.11  | 74.06           | 130.09  | 65.55            |                |                  | 1  |

# K<sub>ac</sub>GSK<sub>cr</sub>K<sub>ac</sub>AVTK H2BK15

MS/MS Fragmentation of **KGSKKAVTK**

Found in **gi|21396484**, histone H2B type 1-C/E/F/G/I [Homo sapiens]

Match to Query 5153: 1097.645544 from(549.830048,2+)

Click mouse within plot area to zoom in by factor of two about that point

Or,   to  Da

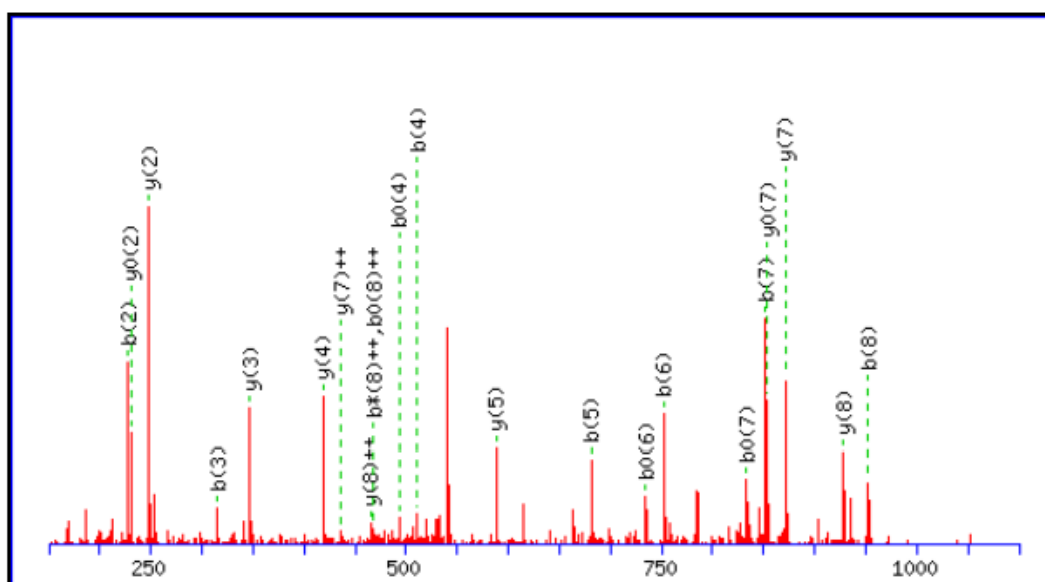

Monoisotopic mass of neutral peptide Mr(calc): 1097.64

Variable modifications:

K1 : Acetyl (K)

K4 : Crotonoyl (K)

K5 : Acetyl (K)

Ions Score: 49 Expect: 4.3e-005

| # | b             | b <sup>++</sup> | b <sup>+</sup> | b <sup>++</sup> | b <sup>0</sup> | b <sup>0++</sup> | Seq. | y             | y <sup>++</sup> | y <sup>+</sup> | y <sup>++</sup> | y <sup>0</sup> | y <sup>0++</sup> | # |
|---|---------------|-----------------|----------------|-----------------|----------------|------------------|------|---------------|-----------------|----------------|-----------------|----------------|------------------|---|
| 1 | 171.11        | 86.06           | 154.09         | 77.55           |                |                  | K    |               |                 |                |                 |                |                  | 9 |
| 2 | <b>228.13</b> | 114.57          | 211.11         | 106.06          |                |                  | G    | <b>928.55</b> | <b>464.78</b>   | 911.52         | 456.26          | 910.54         | 455.77           | 8 |
| 3 | <b>315.17</b> | 158.09          | 298.14         | 149.57          | 297.16         | 149.08           | S    | <b>871.52</b> | <b>436.27</b>   | 854.50         | 427.75          | <b>853.51</b>  | 427.26           | 7 |
| 4 | <b>511.29</b> | 256.15          | 494.26         | 247.63          | <b>493.28</b>  | 247.14           | K    | 784.49        | 392.75          | 767.47         | 384.24          | 766.48         | 383.74           | 6 |
| 5 | <b>681.39</b> | 341.20          | 664.37         | 332.69          | 663.38         | 332.19           | K    | <b>588.37</b> | 294.69          | 571.34         | 286.18          | 570.36         | 285.68           | 5 |
| 6 | <b>752.43</b> | 376.72          | 735.40         | 368.21          | <b>734.42</b>  | 367.71           | A    | <b>418.27</b> | 209.64          | 401.24         | 201.12          | 400.26         | 200.63           | 4 |
| 7 | <b>851.50</b> | 426.25          | 834.47         | 417.74          | <b>833.49</b>  | 417.25           | V    | <b>347.23</b> | 174.12          | 330.20         | 165.60          | 329.22         | 165.11           | 3 |
| 8 | <b>952.55</b> | 476.78          | 935.52         | <b>468.26</b>   | 934.54         | <b>467.77</b>    | T    | <b>248.16</b> | 124.58          | 231.13         | 116.07          | <b>230.15</b>  | 115.58           | 2 |
| 9 |               |                 |                |                 |                |                  | K    | 147.11        | 74.06           | 130.09         | 65.55           |                |                  | 1 |

# K<sub>cr</sub>AVTK<sub>ac</sub>AQK H2BK16

MS/MS Fragmentation of **KAVTKAQK**

Found in **gi|21396484**, histone H2B type 1-C/E/F/G/I [Homo sapiens]

Match to Query 3465: 982.582004 from(492.298278,2+)

Click mouse within plot area to zoom in by factor of two about that point

Or,   to  Da

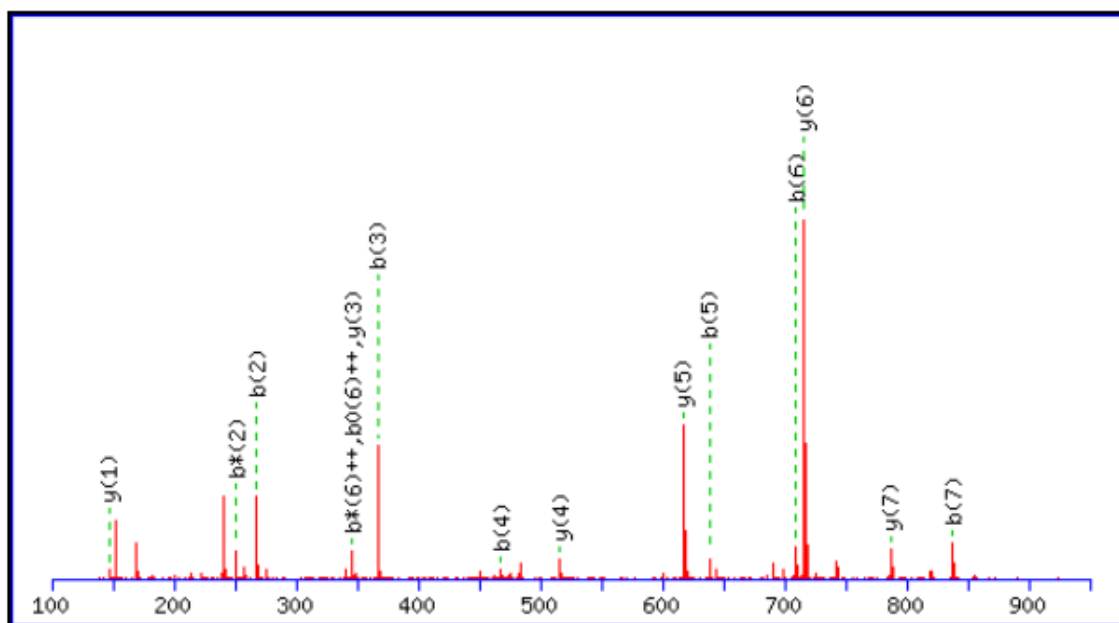

Monoisotopic mass of neutral peptide Mr(calc): 982.58

Variable modifications:

K1 : Crotonoyl (K)

K5 : Acetyl (K)

Ions Score: 39 Expect: 0.00032

| # | b             | b <sup>++</sup> | b <sup>*</sup> | b <sup>*++</sup> | b <sup>0</sup> | b <sup>0++</sup> | Seq. | y             | y <sup>++</sup> | y <sup>*</sup> | y <sup>*++</sup> | y <sup>0</sup> | y <sup>0++</sup> | # |
|---|---------------|-----------------|----------------|------------------|----------------|------------------|------|---------------|-----------------|----------------|------------------|----------------|------------------|---|
| 1 | 197.13        | 99.07           | 180.10         | 90.55            |                |                  | K    |               |                 |                |                  |                |                  | 8 |
| 2 | <b>268.17</b> | 134.59          | <b>251.14</b>  | 126.07           |                |                  | A    | <b>787.47</b> | 394.24          | 770.44         | 385.72           | 769.46         | 385.23           | 7 |
| 3 | <b>367.23</b> | 184.12          | 350.21         | 175.61           |                |                  | V    | <b>716.43</b> | 358.72          | 699.40         | 350.21           | 698.42         | 349.71           | 6 |
| 4 | <b>468.28</b> | 234.64          | 451.26         | 226.13           | 450.27         | 225.64           | T    | <b>617.36</b> | 309.18          | 600.34         | 300.67           | 599.35         | 300.18           | 5 |
| 5 | <b>638.39</b> | 319.70          | 621.36         | 311.18           | 620.38         | 310.69           | K    | <b>516.31</b> | 258.66          | 499.29         | 250.15           |                |                  | 4 |
| 6 | <b>709.42</b> | 355.22          | 692.40         | <b>346.70</b>    | 691.41         | <b>346.21</b>    | A    | <b>346.21</b> | 173.61          | 329.18         | 165.09           |                |                  | 3 |
| 7 | <b>837.48</b> | 419.25          | 820.46         | 410.73           | 819.47         | 410.24           | Q    | 275.17        | 138.09          | 258.14         | 129.58           |                |                  | 2 |
| 8 |               |                 |                |                  |                |                  | K    | <b>147.11</b> | 74.06           | 130.09         | 65.55            |                |                  | 1 |

**KGSK<sub>ac</sub>K<sub>ac</sub>AVTK<sub>cr</sub>AQK**

**H2BK20**

MS/MS Fragmentation of **KGSKAVTKAQK**

Found in **gi|21396484**, histone H2B type 1-C/E/F/G/I [Homo sapiens]

Match to Query 15701: 1424.835364 from(713.424958,2+)

Click mouse within plot area to zoom in by factor of two about that point

Or,   to  Da

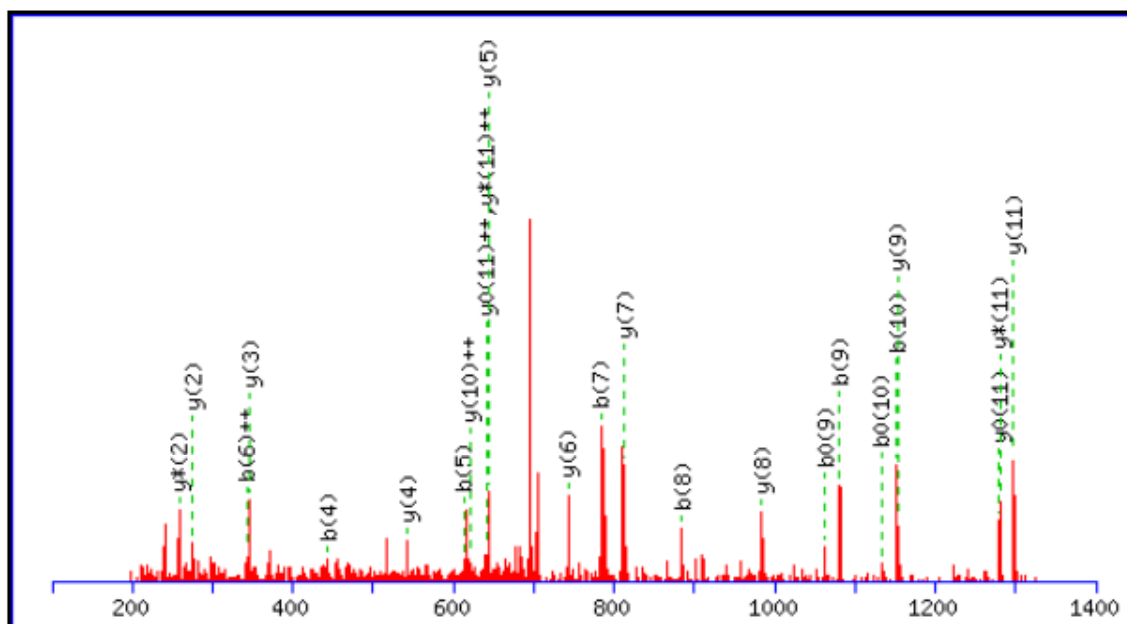

Monoisotopic mass of neutral peptide Mr(calc): 1424.84

Variable modifications:

K4 : Acetyl (K)

K5 : Acetyl (K)

K9 : Crotonoyl (K)

Ions Score: 48 Expect: 4e-005

| #  | b       | b <sup>++</sup> | b <sup>+</sup> | b <sup>++</sup> | b <sup>0</sup> | b <sup>0++</sup> | Seq. | y       | y <sup>++</sup> | y <sup>+</sup> | y <sup>++</sup> | y <sup>0</sup> | y <sup>0++</sup> | #  |
|----|---------|-----------------|----------------|-----------------|----------------|------------------|------|---------|-----------------|----------------|-----------------|----------------|------------------|----|
| 1  | 129.10  | 65.05           | 112.08         | 56.54           |                |                  | K    |         |                 |                |                 |                |                  | 12 |
| 2  | 186.12  | 93.57           | 169.10         | 85.05           |                |                  | G    | 1297.75 | 649.38          | 1280.72        | 640.86          | 1279.74        | 640.37           | 11 |
| 3  | 273.16  | 137.08          | 256.13         | 128.57          | 255.15         | 128.08           | S    | 1240.73 | 620.87          | 1223.70        | 612.35          | 1222.72        | 611.86           | 10 |
| 4  | 443.26  | 222.13          | 426.23         | 213.62          | 425.25         | 213.13           | K    | 1153.69 | 577.35          | 1136.67        | 568.84          | 1135.68        | 568.35           | 9  |
| 5  | 613.37  | 307.19          | 596.34         | 298.67          | 595.36         | 298.18           | K    | 983.59  | 492.30          | 966.56         | 483.78          | 965.58         | 483.29           | 8  |
| 6  | 684.40  | 342.71          | 667.38         | 334.19          | 666.39         | 333.70           | A    | 813.48  | 407.25          | 796.46         | 398.73          | 795.47         | 398.24           | 7  |
| 7  | 783.47  | 392.24          | 766.45         | 383.73          | 765.46         | 383.23           | V    | 742.45  | 371.73          | 725.42         | 363.21          | 724.44         | 362.72           | 6  |
| 8  | 884.52  | 442.76          | 867.49         | 434.25          | 866.51         | 433.76           | T    | 643.38  | 322.19          | 626.35         | 313.68          | 625.37         | 313.19           | 5  |
| 9  | 1080.64 | 540.82          | 1063.61        | 532.31          | 1062.63        | 531.82           | K    | 542.33  | 271.67          | 525.30         | 263.16          |                |                  | 4  |
| 10 | 1151.68 | 576.34          | 1134.65        | 567.83          | 1133.67        | 567.34           | A    | 346.21  | 173.61          | 329.18         | 165.09          |                |                  | 3  |
| 11 | 1279.74 | 640.37          | 1262.71        | 631.86          | 1261.73        | 631.37           | Q    | 275.17  | 138.09          | 258.14         | 129.58          |                |                  | 2  |
| 12 |         |                 |                |                 |                |                  | K    | 147.11  | 74.06           | 130.09         | 65.55           |                |                  | 1  |

K<sub>ac</sub>GSK<sub>ac</sub>K<sub>ac</sub>AVTK<sub>ac</sub>AQK<sub>cr</sub>K

H2BK23

MS/MS Fragmentation of **KGSKKAVTKAQKK**

Found in **gi|21396484**, histone H2B type 1-C/E/F/G/I [Homo sapiens]

Match to Query 16760: 1636.948572 from(546.656800,3+)

Click mouse within plot area to zoom in by factor of two about that point

Or,   to  Da

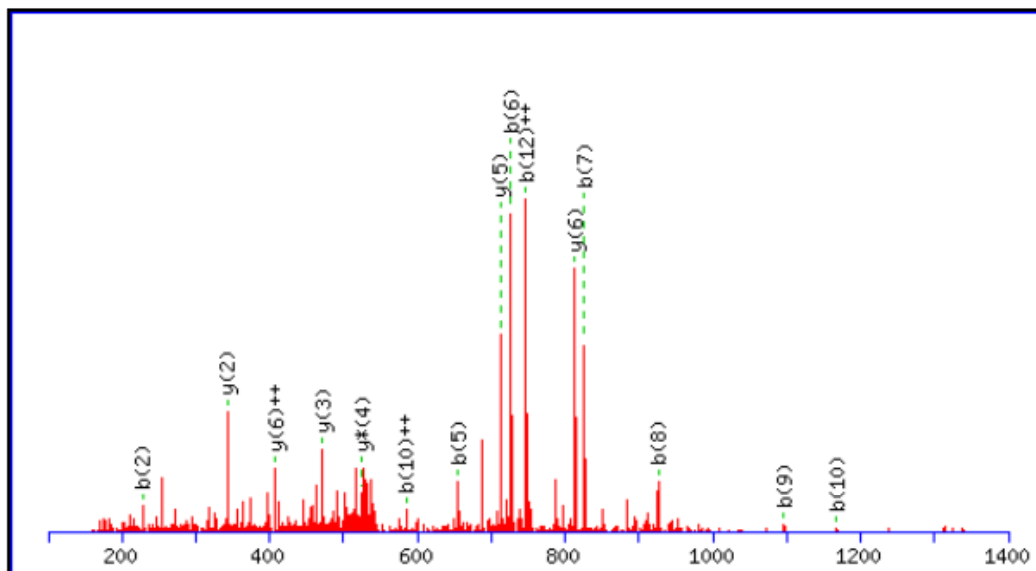

Monoisotopic mass of neutral peptide Mr(calc): 1636.95

Variable modifications:

K1 : Acetyl (K)

K4 : Acetyl (K)

K5 : Acetyl (K)

K9 : Acetyl (K)

K12 : Crotonoyl (K)

Ions Score: 37 Expect: 0.00068

| #  | b       | b <sup>++</sup> | b <sup>+</sup> | b <sup>++</sup> | b <sup>0</sup> | b <sup>0++</sup> | Seq. | y       | y <sup>++</sup> | y <sup>+</sup> | y <sup>++</sup> | y <sup>0</sup> | y <sup>0++</sup> | #  |
|----|---------|-----------------|----------------|-----------------|----------------|------------------|------|---------|-----------------|----------------|-----------------|----------------|------------------|----|
| 1  | 171.11  | 86.06           | 154.09         | 77.55           |                |                  | K    |         |                 |                |                 |                |                  | 13 |
| 2  | 228.13  | 114.57          | 211.11         | 106.06          |                |                  | G    | 1467.85 | 734.43          | 1450.83        | 725.92          | 1449.84        | 725.42           | 12 |
| 3  | 315.17  | 158.09          | 298.14         | 149.57          | 297.16         | 149.08           | S    | 1410.83 | 705.92          | 1393.80        | 697.41          | 1392.82        | 696.91           | 11 |
| 4  | 485.27  | 243.14          | 468.25         | 234.63          | 467.26         | 234.13           | K    | 1323.80 | 662.40          | 1306.77        | 653.89          | 1305.79        | 653.40           | 10 |
| 5  | 655.38  | 328.19          | 638.35         | 319.68          | 637.37         | 319.19           | K    | 1153.69 | 577.35          | 1136.67        | 568.84          | 1135.68        | 568.35           | 9  |
| 6  | 726.41  | 363.71          | 709.39         | 355.20          | 708.40         | 354.71           | A    | 983.59  | 492.30          | 966.56         | 483.78          | 965.58         | 483.29           | 8  |
| 7  | 825.48  | 413.25          | 808.46         | 404.73          | 807.47         | 404.24           | V    | 912.55  | 456.78          | 895.52         | 448.27          | 894.54         | 447.77           | 7  |
| 8  | 926.53  | 463.77          | 909.50         | 455.26          | 908.52         | 454.76           | T    | 813.48  | 407.25          | 796.46         | 398.73          | 795.47         | 398.24           | 6  |
| 9  | 1096.64 | 548.82          | 1079.61        | 540.31          | 1078.63        | 539.82           | K    | 712.44  | 356.72          | 695.41         | 348.21          |                |                  | 5  |
| 10 | 1167.67 | 584.34          | 1150.65        | 575.83          | 1149.66        | 575.33           | A    | 542.33  | 271.67          | 525.30         | 263.16          |                |                  | 4  |
| 11 | 1295.73 | 648.37          | 1278.71        | 639.86          | 1277.72        | 639.36           | Q    | 471.29  | 236.15          | 454.27         | 227.64          |                |                  | 3  |
| 12 | 1491.85 | 746.43          | 1474.83        | 737.92          | 1473.84        | 737.42           | K    | 343.23  | 172.12          | 326.21         | 163.61          |                |                  | 2  |
| 13 |         |                 |                |                 |                |                  | K    | 147.11  | 74.06           | 130.09         | 65.55           |                |                  | 1  |

K<sub>cr</sub>ESYSVYVYK

H2BK34

MS/MS Fragmentation of **KESYSVYVYK**

Found in [gi|1568551](#), histone H2B [Homo sapiens]

Match to Query 29137: 1332.659214 from(667.336883,2+)

Click mouse within plot area to zoom in by factor of two about that point

Or,   to  Da

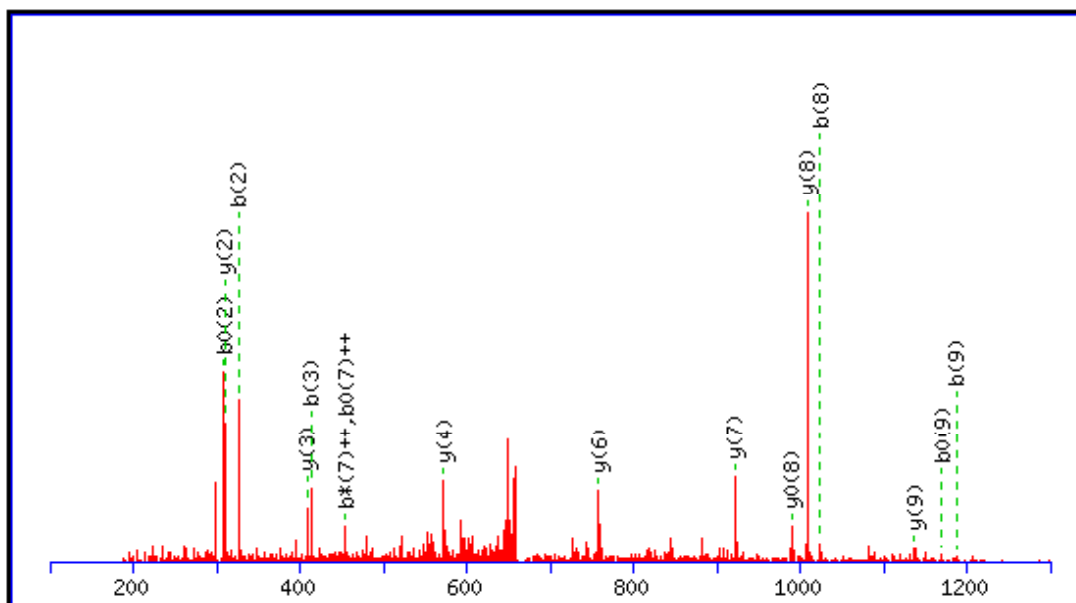

**Monoisotopic mass of neutral peptide Mr(calc):** 1332.66

**Variable modifications:**

**K1** : Crotonoyl (K)

**Ions Score:** 32 **Expect:** 0.12

**Matches (Bold Red):** 16/96 fragment ions using 51 most intense peaks

| #  | b              | b <sup>++</sup> | b <sup>*</sup> | b <sup>++</sup> | b <sup>0</sup> | b <sup>0++</sup> | Seq. | y              | y <sup>++</sup> | y <sup>*</sup> | y <sup>++</sup> | y <sup>0</sup> | y <sup>0++</sup> | #  |
|----|----------------|-----------------|----------------|-----------------|----------------|------------------|------|----------------|-----------------|----------------|-----------------|----------------|------------------|----|
| 1  | 197.13         | 99.07           | 180.10         | 90.55           |                |                  | K    |                |                 |                |                 |                |                  | 10 |
| 2  | <b>326.17</b>  | 163.59          | 309.14         | 155.08          | <b>308.16</b>  | 154.58           | E    | <b>1137.55</b> | 569.28          | 1120.52        | 560.76          | 1119.54        | 560.27           | 9  |
| 3  | <b>413.20</b>  | 207.11          | 396.18         | 198.59          | 395.19         | 198.10           | S    | <b>1008.50</b> | 504.76          | 991.48         | 496.24          | <b>990.49</b>  | 495.75           | 8  |
| 4  | 576.27         | 288.64          | 559.24         | 280.12          | 558.26         | 279.63           | Y    | <b>921.47</b>  | 461.24          | 904.45         | 452.73          | 903.46         | 452.23           | 7  |
| 5  | 663.30         | 332.15          | 646.27         | 323.64          | 645.29         | 323.15           | S    | <b>758.41</b>  | 379.71          | 741.38         | 371.19          | 740.40         | 370.70           | 6  |
| 6  | 762.37         | 381.69          | 745.34         | 373.17          | 744.36         | 372.68           | V    | 671.38         | 336.19          | 654.35         | 327.68          |                |                  | 5  |
| 7  | 925.43         | 463.22          | 908.40         | <b>454.71</b>   | 907.42         | <b>454.21</b>    | Y    | <b>572.31</b>  | 286.66          | 555.28         | 278.14          |                |                  | 4  |
| 8  | <b>1024.50</b> | 512.75          | 1007.47        | 504.24          | 1006.49        | 503.75           | V    | <b>409.24</b>  | 205.13          | 392.22         | 196.61          |                |                  | 3  |
| 9  | <b>1187.56</b> | 594.28          | 1170.54        | 585.77          | <b>1169.55</b> | 585.28           | Y    | <b>310.18</b>  | 155.59          | 293.15         | 147.08          |                |                  | 2  |
| 10 |                |                 |                |                 |                |                  | K    | 147.11         | 74.06           | 130.09         | 65.55           |                |                  | 1  |

# TK<sub>cr</sub>QTAR H3K4

MS/MS Fragmentation of **TKQTAR**

Found in **gi|386772**, histone H3 [Homo sapiens]

Match to Query 1281: 771.425324 from(386.719938,2+)

Click mouse within plot area to zoom in by factor of two about that point

Or,   to  Da

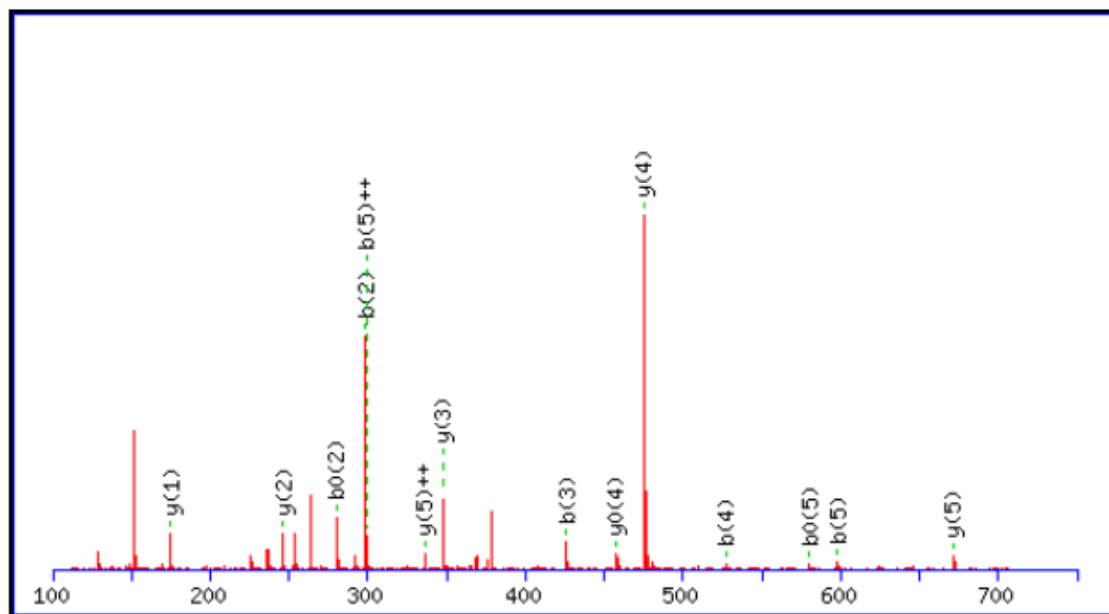

Monoisotopic mass of neutral peptide Mr(calcd): 771.42

Variable modifications:

K2 : Crotonoyl (K)

Ions Score: 34 Expect: 0.0011

| # | b             | b <sup>++</sup> | b <sup>*</sup> | b <sup>++*</sup> | b <sup>0</sup> | b <sup>0++</sup> | Seq. | y             | y <sup>++</sup> | y <sup>*</sup> | y <sup>++*</sup> | y <sup>0</sup> | y <sup>0++</sup> | # |
|---|---------------|-----------------|----------------|------------------|----------------|------------------|------|---------------|-----------------|----------------|------------------|----------------|------------------|---|
| 1 | 102.05        | 51.53           |                |                  | 84.04          | 42.53            | T    |               |                 |                |                  |                |                  | 6 |
| 2 | <b>298.18</b> | 149.59          | 281.15         | 141.08           | <b>280.17</b>  | 140.59           | K    | <b>671.38</b> | <b>336.20</b>   | 654.36         | 327.68           | 653.37         | 327.19           | 5 |
| 3 | <b>426.23</b> | 213.62          | 409.21         | 205.11           | 408.22         | 204.62           | Q    | <b>475.26</b> | 238.13          | 458.24         | 229.62           | <b>457.25</b>  | 229.13           | 4 |
| 4 | <b>527.28</b> | 264.14          | 510.26         | 255.63           | 509.27         | 255.14           | T    | <b>347.20</b> | 174.11          | 330.18         | 165.59           | 329.19         | 165.10           | 3 |
| 5 | <b>598.32</b> | <b>299.66</b>   | 581.29         | 291.15           | <b>580.31</b>  | 290.66           | A    | <b>246.16</b> | 123.58          | 229.13         | 115.07           |                |                  | 2 |
| 6 |               |                 |                |                  |                |                  | R    | <b>175.12</b> | 88.06           | 158.09         | 79.55            |                |                  | 1 |

**K<sub>cr</sub>STGGK<sub>ac</sub>APR****H3K9**MS/MS Fragmentation of **KSTGGKAPR**Found in **gi|386772**, histone H3 [Homo sapiens]

Match to Query 3855: 1010.552034 from(506.283293,2+)

Click mouse within plot area to zoom in by factor of two about that point

Or, Plot from  to  Da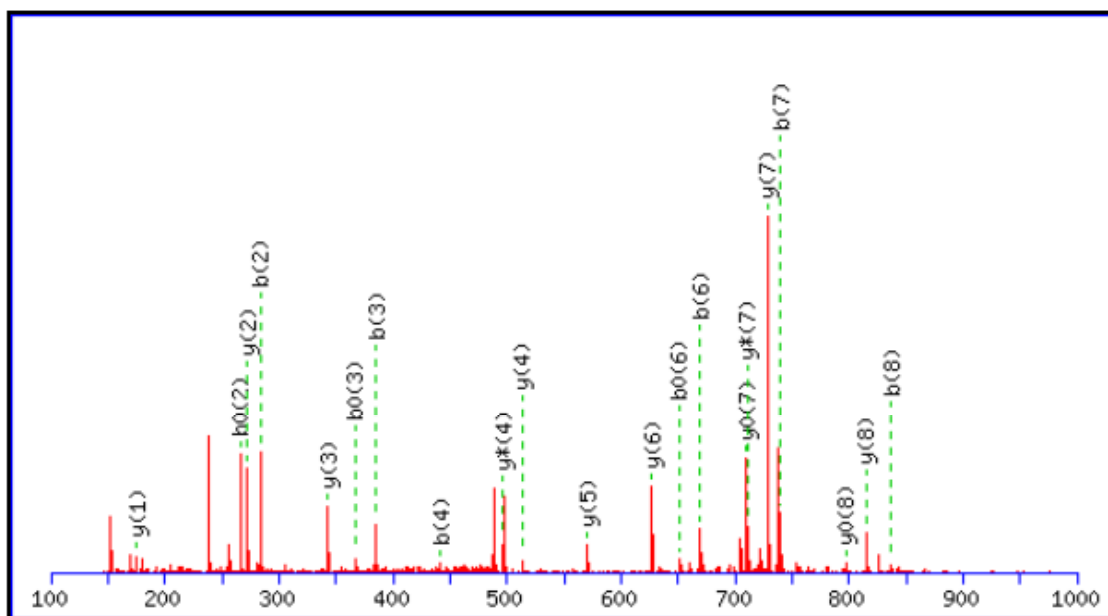

Monoisotopic mass of neutral peptide Mr(calc): 1010.55

Variable modifications:

K1 : Crotonoyl (K)

K6 : Acetyl (K)

Ions Score: 38 Expect: 0.00037

| # | b      | b <sup>++</sup> | b <sup>*</sup> | b <sup>++</sup> | b <sup>0</sup> | b <sup>0++</sup> | Seq. | y      | y <sup>++</sup> | y <sup>*</sup> | y <sup>++</sup> | y <sup>0</sup> | y <sup>0++</sup> | # |
|---|--------|-----------------|----------------|-----------------|----------------|------------------|------|--------|-----------------|----------------|-----------------|----------------|------------------|---|
| 1 | 197.13 | 99.07           | 180.10         | 90.55           |                |                  | K    |        |                 |                |                 |                |                  | 9 |
| 2 | 284.16 | 142.58          | 267.13         | 134.07          | 266.15         | 133.58           | S    | 815.44 | 408.22          | 798.41         | 399.71          | 797.43         | 399.22           | 8 |
| 3 | 385.21 | 193.11          | 368.18         | 184.59          | 367.20         | 184.10           | T    | 728.40 | 364.71          | 711.38         | 356.19          | 710.39         | 355.70           | 7 |
| 4 | 442.23 | 221.62          | 425.20         | 213.11          | 424.22         | 212.61           | G    | 627.36 | 314.18          | 610.33         | 305.67          |                |                  | 6 |
| 5 | 499.25 | 250.13          | 482.22         | 241.62          | 481.24         | 241.12           | G    | 570.34 | 285.67          | 553.31         | 277.16          |                |                  | 5 |
| 6 | 669.36 | 335.18          | 652.33         | 326.67          | 651.35         | 326.18           | K    | 513.31 | 257.16          | 496.29         | 248.65          |                |                  | 4 |
| 7 | 740.39 | 370.70          | 723.37         | 362.19          | 722.38         | 361.70           | A    | 343.21 | 172.11          | 326.18         | 163.59          |                |                  | 3 |
| 8 | 837.45 | 419.23          | 820.42         | 410.71          | 819.44         | 410.22           | P    | 272.17 | 136.59          | 255.15         | 128.08          |                |                  | 2 |
| 9 |        |                 |                |                 |                |                  | R    | 175.12 | 88.06           | 158.09         | 79.55           |                |                  | 1 |

**K<sub>cr</sub>QLATK**

**H3K18**

MS/MS Fragmentation of **KQLATK**

Found in **gi|386772**, histone H3 [Homo sapiens]

Match to Query 1098: 755.454744 from(378.734648,2+)

Click mouse within plot area to zoom in by factor of two about that point

Or,   to  Da

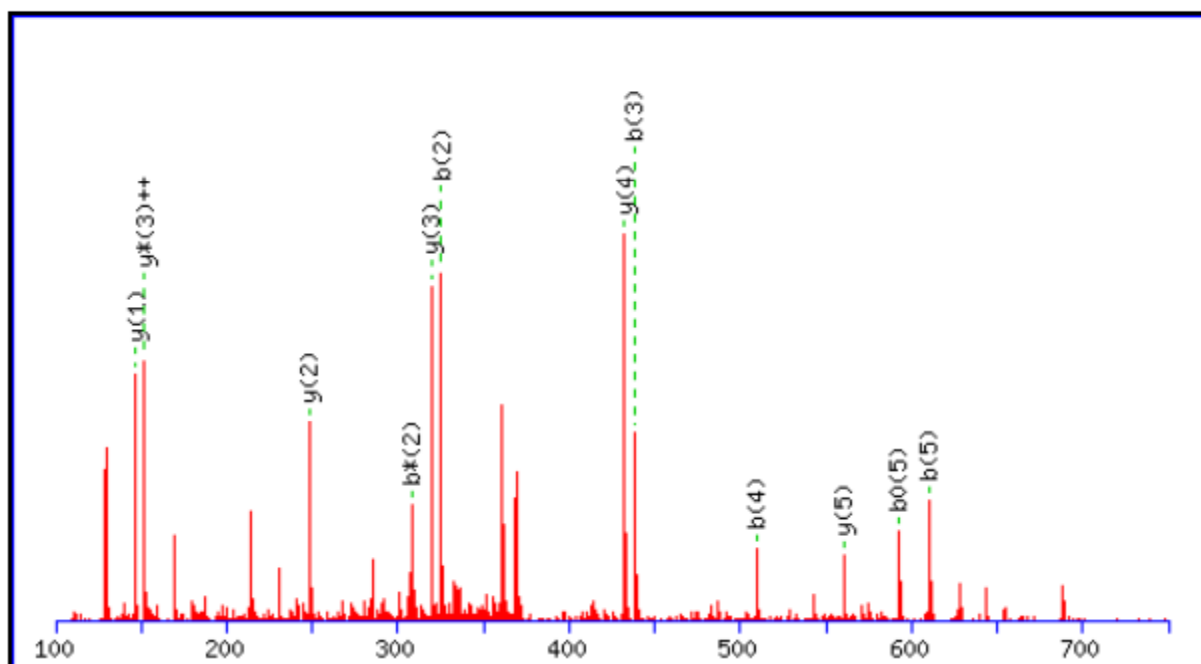

Monoisotopic mass of neutral peptide Mr(calc): 755.45

Variable modifications:

K1 : Crotonoyl (K)

Ions Score: 47 Expect: 4.5e-005

| # | b      | b <sup>++</sup> | b <sup>*</sup> | b <sup>*++</sup> | b <sup>0</sup> | b <sup>0++</sup> | Seq. | y      | y <sup>++</sup> | y <sup>*</sup> | y <sup>*++</sup> | y <sup>0</sup> | y <sup>0++</sup> | # |
|---|--------|-----------------|----------------|------------------|----------------|------------------|------|--------|-----------------|----------------|------------------|----------------|------------------|---|
| 1 | 197.13 | 99.07           | 180.10         | 90.55            |                |                  | K    |        |                 |                |                  |                |                  | 6 |
| 2 | 325.19 | 163.10          | 308.16         | 154.58           |                |                  | Q    | 560.34 | 280.67          | 543.31         | 272.16           | 542.33         | 271.67           | 5 |
| 3 | 438.27 | 219.64          | 421.24         | 211.13           |                |                  | L    | 432.28 | 216.64          | 415.26         | 208.13           | 414.27         | 207.64           | 4 |
| 4 | 509.31 | 255.16          | 492.28         | 246.64           |                |                  | A    | 319.20 | 160.10          | 302.17         | 151.59           | 301.19         | 151.10           | 3 |
| 5 | 610.36 | 305.68          | 593.33         | 297.17           | 592.35         | 296.68           | T    | 248.16 | 124.58          | 231.13         | 116.07           | 230.15         | 115.58           | 2 |
| 6 |        |                 |                |                  |                |                  | K    | 147.11 | 74.06           | 130.09         | 65.55            |                |                  | 1 |

# K<sub>pr</sub>QLATK<sub>cr</sub>AAR\* H3K23

\*Note: From propionylated sample.

MS/MS Fragmentation of **KQLATKAAR**

Found in **gi386772**, histone H3 [Homo sapiens]

Match to Query 19184: 1165.678134 from(583.846343,2+)

Click mouse within plot area to zoom in by factor of two about that point

Or,   to  Da

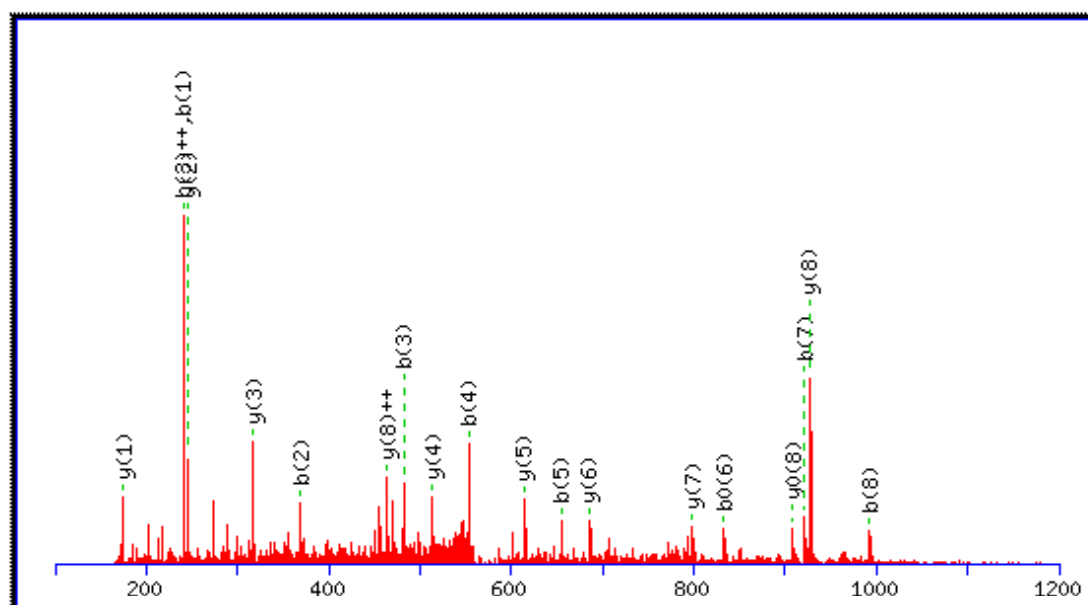

Monoisotopic mass of neutral peptide Mr(calc): 1165.68

Fixed modifications: Propionyl (N-term)

Variable modifications:

K1 : Propionyl (K)

K6 : Crotonoyl (K)

Ions Score: 50 Expect: 0.0024

Matches (**Bold Red**): 19/80 fragment ions using 37 most intense peaks

| # | b             | b <sup>++</sup> | b <sup>+</sup> | b <sup>+++</sup> | b <sup>0</sup> | b <sup>0++</sup> | Seq. | y             | y <sup>++</sup> | y <sup>+</sup> | y <sup>+++</sup> | y <sup>0</sup> | y <sup>0++</sup> | # |
|---|---------------|-----------------|----------------|------------------|----------------|------------------|------|---------------|-----------------|----------------|------------------|----------------|------------------|---|
| 1 | <b>241.15</b> | 121.08          | 224.13         | 112.57           |                |                  | K    |               |                 |                |                  |                |                  | 9 |
| 2 | <b>369.21</b> | 185.11          | 352.19         | 176.60           |                |                  | Q    | <b>926.54</b> | <b>463.77</b>   | 909.52         | 455.26           | <b>908.53</b>  | 454.77           | 8 |
| 3 | <b>482.30</b> | <b>241.65</b>   | 465.27         | 233.14           |                |                  | L    | <b>798.48</b> | 399.75          | 781.46         | 391.23           | 780.47         | 390.74           | 7 |
| 4 | <b>553.33</b> | 277.17          | 536.31         | 268.66           |                |                  | A    | <b>685.40</b> | 343.20          | 668.37         | 334.69           | 667.39         | 334.20           | 6 |
| 5 | <b>654.38</b> | 327.69          | 637.36         | 319.18           | 636.37         | 318.69           | T    | <b>614.36</b> | 307.68          | 597.34         | 299.17           | 596.35         | 298.68           | 5 |
| 6 | 850.50        | 425.76          | 833.48         | 417.24           | <b>832.49</b>  | 416.75           | K    | <b>513.31</b> | 257.16          | 496.29         | 248.65           |                |                  | 4 |
| 7 | <b>921.54</b> | 461.27          | 904.51         | 452.76           | 903.53         | 452.27           | A    | <b>317.19</b> | 159.10          | 300.17         | 150.59           |                |                  | 3 |
| 8 | <b>992.58</b> | 496.79          | 975.55         | 488.28           | 974.57         | 487.79           | A    | <b>246.16</b> | 123.58          | 229.13         | 115.07           |                |                  | 2 |
| 9 |               |                 |                |                  |                |                  | R    | <b>175.12</b> | 88.06           | 158.09         | 79.55            |                |                  | 1 |

**K<sub>cr</sub>SAPATGGVK****H3K27**MS/MS Fragmentation of **KSAPATGGVK**Found in **gi|386772**, histone H3 [Homo sapiens]

Match to Query 3424: 982.545204 from(492.279878,2+)

Click mouse within plot area to zoom in by factor of two about that point

Or, Plot from  to  Da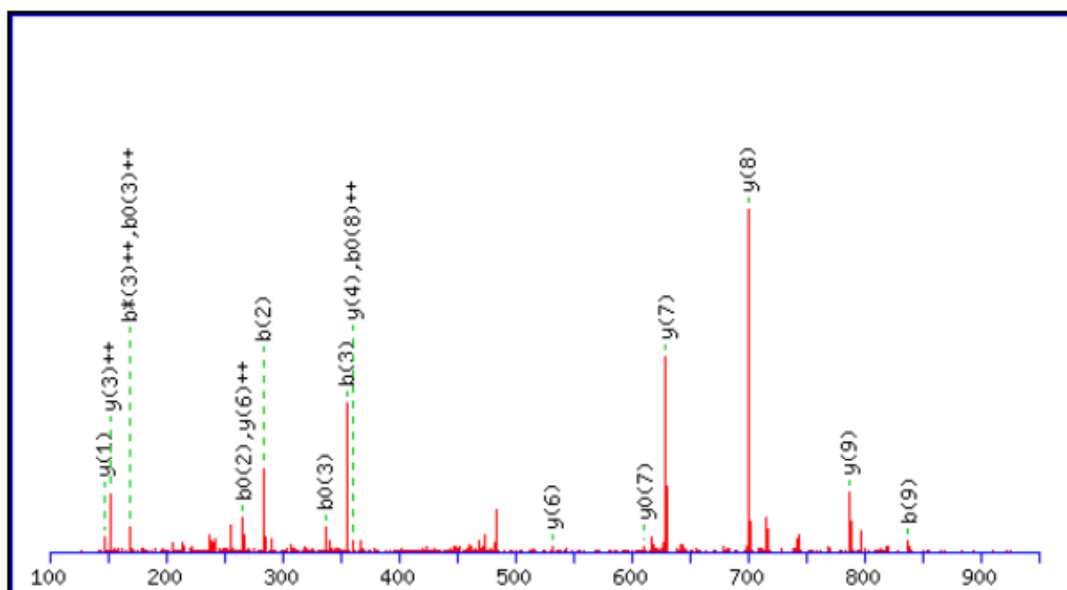

Monoisotopic mass of neutral peptide Mr(calc): 982.54

Variable modifications:

K1 : Crotonoyl (K)

Ions Score: 34 Expect: 0.0007

| #  | b      | b <sup>++</sup> | b <sup>*</sup> | b <sup>*++</sup> | b <sup>0</sup> | b <sup>0++</sup> | Seq. | y      | y <sup>++</sup> | y <sup>*</sup> | y <sup>*++</sup> | y <sup>0</sup> | y <sup>0++</sup> | #  |
|----|--------|-----------------|----------------|------------------|----------------|------------------|------|--------|-----------------|----------------|------------------|----------------|------------------|----|
| 1  | 197.13 | 99.07           | 180.10         | 90.55            |                |                  | K    |        |                 |                |                  |                |                  | 10 |
| 2  | 284.16 | 142.58          | 267.13         | 134.07           | 266.15         | 133.58           | S    | 787.43 | 394.22          | 770.40         | 385.71           | 769.42         | 385.21           | 9  |
| 3  | 355.20 | 178.10          | 338.17         | 169.59           | 337.19         | 169.10           | A    | 700.40 | 350.70          | 683.37         | 342.19           | 682.39         | 341.70           | 8  |
| 4  | 452.25 | 226.63          | 435.22         | 218.12           | 434.24         | 217.62           | P    | 629.36 | 315.18          | 612.34         | 306.67           | 611.35         | 306.18           | 7  |
| 5  | 523.29 | 262.15          | 506.26         | 253.63           | 505.28         | 253.14           | A    | 532.31 | 266.66          | 515.28         | 258.14           | 514.30         | 257.65           | 6  |
| 6  | 624.34 | 312.67          | 607.31         | 304.16           | 606.32         | 303.67           | T    | 461.27 | 231.14          | 444.25         | 222.63           | 443.26         | 222.13           | 5  |
| 7  | 681.36 | 341.18          | 664.33         | 332.67           | 663.35         | 332.18           | G    | 360.22 | 180.62          | 343.20         | 172.10           |                |                  | 4  |
| 8  | 738.38 | 369.69          | 721.35         | 361.18           | 720.37         | 360.69           | G    | 303.20 | 152.10          | 286.18         | 143.59           |                |                  | 3  |
| 9  | 837.45 | 419.23          | 820.42         | 410.71           | 819.44         | 410.22           | V    | 246.18 | 123.59          | 229.15         | 115.08           |                |                  | 2  |
| 10 |        |                 |                |                  |                |                  | K    | 147.11 | 74.06           | 130.09         | 65.55            |                |                  | 1  |

# YQK<sub>cr</sub>STELLIR

# H3K56

MS/MS Fragmentation of **YQKSTELLIR**

Found in **IPI00171611**, Tax\_Id=9606 Gene\_Symbol=HIST2H3D;HIST2H3C;HIST2H3A Histone H3.2

Match to Query 11151: 1317.728064 from(659.871308,2+)

Click mouse within plot area to zoom in by factor of two about that point

Or,   to  Da

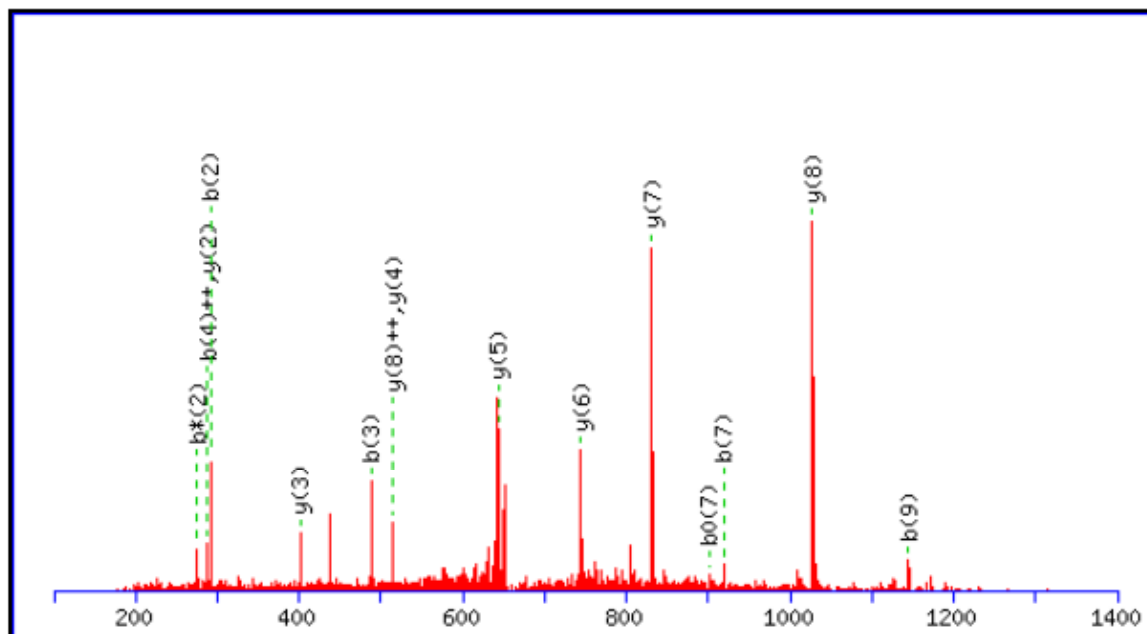

Monoisotopic mass of neutral peptide Mr(calc): 1317.73

Variable modifications:

K3 : Crotonoyl (K)

Ions Score: 47 Expect: 0.049

| #  | b       | b <sup>++</sup> | b <sup>*</sup> | b <sup>*++</sup> | b <sup>0</sup> | b <sup>0++</sup> | Seq. | y       | y <sup>++</sup> | y <sup>*</sup> | y <sup>*++</sup> | y <sup>0</sup> | y <sup>0++</sup> | #  |
|----|---------|-----------------|----------------|------------------|----------------|------------------|------|---------|-----------------|----------------|------------------|----------------|------------------|----|
| 1  | 164.07  | 82.54           |                |                  |                |                  | Y    |         |                 |                |                  |                |                  | 10 |
| 2  | 292.13  | 146.57          | 275.10         | 138.05           |                |                  | Q    | 1155.67 | 578.34          | 1138.65        | 569.83           | 1137.66        | 569.33           | 9  |
| 3  | 488.25  | 244.63          | 471.22         | 236.12           |                |                  | K    | 1027.61 | 514.31          | 1010.59        | 505.80           | 1009.60        | 505.31           | 8  |
| 4  | 575.28  | 288.14          | 558.26         | 279.63           | 557.27         | 279.14           | S    | 831.49  | 416.25          | 814.47         | 407.74           | 813.48         | 407.25           | 7  |
| 5  | 676.33  | 338.67          | 659.30         | 330.16           | 658.32         | 329.66           | T    | 744.46  | 372.73          | 727.43         | 364.22           | 726.45         | 363.73           | 6  |
| 6  | 805.37  | 403.19          | 788.35         | 394.68           | 787.36         | 394.18           | E    | 643.41  | 322.21          | 626.39         | 313.70           | 625.40         | 313.21           | 5  |
| 7  | 918.46  | 459.73          | 901.43         | 451.22           | 900.45         | 450.73           | L    | 514.37  | 257.69          | 497.34         | 249.18           |                |                  | 4  |
| 8  | 1031.54 | 516.27          | 1014.51        | 507.76           | 1013.53        | 507.27           | L    | 401.29  | 201.15          | 384.26         | 192.63           |                |                  | 3  |
| 9  | 1144.62 | 572.82          | 1127.60        | 564.30           | 1126.61        | 563.81           | I    | 288.20  | 144.61          | 271.18         | 136.09           |                |                  | 2  |
| 10 |         |                 |                |                  |                |                  | R    | 175.12  | 88.06           | 158.09         | 79.55            |                |                  | 1  |

**GK<sub>cr</sub>GGK<sub>ac</sub>GLGK**

**H4K5**

MS/MS Fragmentation of **GKGGKGLGK**

Found in **gi|28173560**, histone H4 [Homo sapiens]

Match to Query 2364: 910.524514 from(456.269533,2+)

Click mouse within plot area to zoom in by factor of two about that point

Or,   to  Da

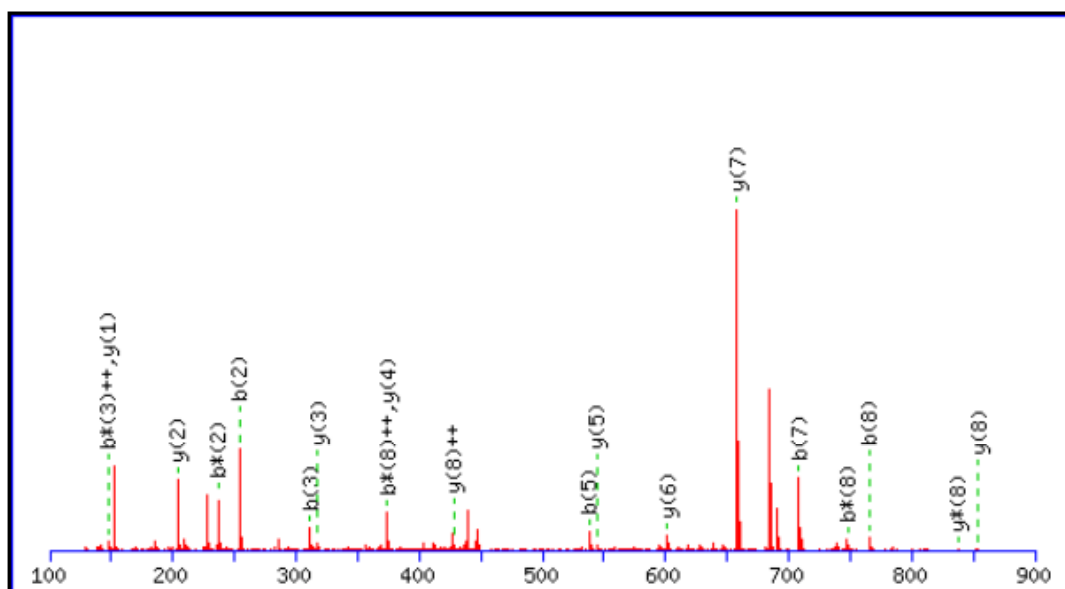

Monoisotopic mass of neutral peptide Mr(calc): 910.52

Variable modifications:

K2 : Crotonoyl (K)

K5 : Acetyl (K)

Ions Score: 41 Expect: 0.00021

| # | b      | b <sup>++</sup> | b <sup>*</sup> | b <sup>++</sup> * | Seq. | y      | y <sup>++</sup> | y <sup>*</sup> | y <sup>++</sup> * | # |
|---|--------|-----------------|----------------|-------------------|------|--------|-----------------|----------------|-------------------|---|
| 1 | 58.03  | 29.52           |                |                   | G    |        |                 |                |                   | 9 |
| 2 | 254.15 | 127.58          | 237.12         | 119.07            | K    | 854.51 | 427.76          | 837.48         | 419.25            | 8 |
| 3 | 311.17 | 156.09          | 294.14         | 147.58            | G    | 658.39 | 329.70          | 641.36         | 321.18            | 7 |
| 4 | 368.19 | 184.60          | 351.17         | 176.09            | G    | 601.37 | 301.19          | 584.34         | 292.67            | 6 |
| 5 | 538.30 | 269.65          | 521.27         | 261.14            | K    | 544.35 | 272.68          | 527.32         | 264.16            | 5 |
| 6 | 595.32 | 298.16          | 578.29         | 289.65            | G    | 374.24 | 187.62          | 357.21         | 179.11            | 4 |
| 7 | 708.40 | 354.71          | 691.38         | 346.19            | L    | 317.22 | 159.11          | 300.19         | 150.60            | 3 |
| 8 | 765.43 | 383.22          | 748.40         | 374.70            | G    | 204.13 | 102.57          | 187.11         | 94.06             | 2 |
| 9 |        |                 |                |                   | K    | 147.11 | 74.06           | 130.09         | 65.55             | 1 |

# GGK<sub>cr</sub>GLGK<sub>ac</sub>GGAK<sub>ac</sub>R H4K8

MS/MS Fragmentation of **GGKGLGKGGAKR**  
Found in **gi|28173560**, histone H4 [Homo sapiens]

Match to Query 8941: 1236.685994 from(619.350273,2+)

Click mouse within plot area to zoom in by factor of two about that point

Or,   to  Da

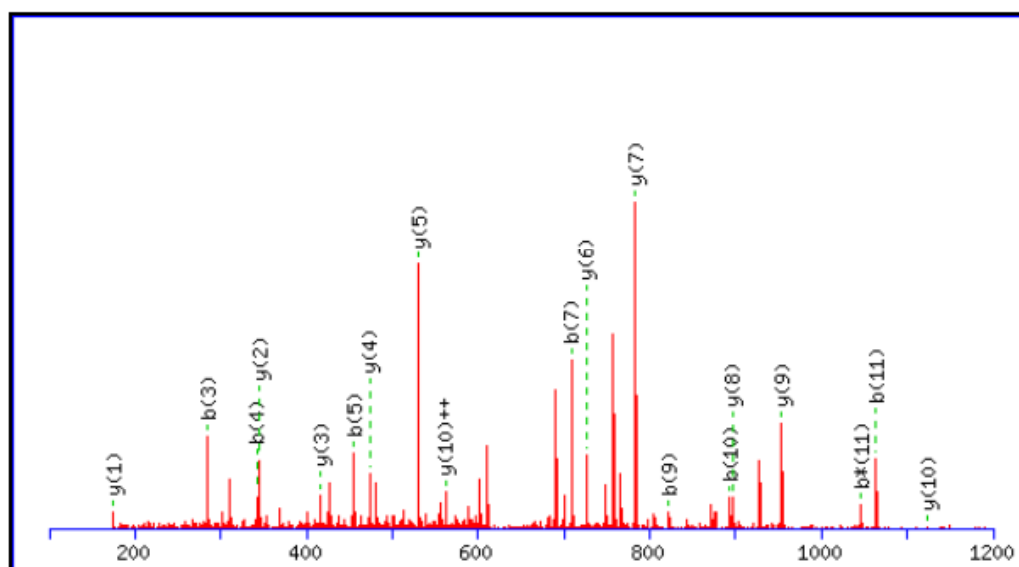

Monoisotopic mass of neutral peptide Mr(calc): 1236.69

Variable modifications:

K3 : Acetyl (K)

K7 : Crotonoyl (K)

K11 : Acetyl (K)

Ions Score: 52 Expect: 1.8e-005

| #  | b       | b <sup>++</sup> | b <sup>*</sup> | b <sup>*++</sup> | Seq. | y       | y <sup>++</sup> | y <sup>*</sup> | y <sup>*++</sup> | #  |
|----|---------|-----------------|----------------|------------------|------|---------|-----------------|----------------|------------------|----|
| 1  | 58.03   | 29.52           |                |                  | G    |         |                 |                |                  | 12 |
| 2  | 115.05  | 58.03           |                |                  | G    | 1180.68 | 590.84          | 1163.65        | 582.33           | 11 |
| 3  | 285.16  | 143.08          | 268.13         | 134.57           | K    | 1123.66 | 562.33          | 1106.63        | 553.82           | 10 |
| 4  | 342.18  | 171.59          | 325.15         | 163.08           | G    | 953.55  | 477.28          | 936.53         | 468.77           | 9  |
| 5  | 455.26  | 228.13          | 438.23         | 219.62           | L    | 896.53  | 448.77          | 879.50         | 440.26           | 8  |
| 6  | 512.28  | 256.64          | 495.26         | 248.13           | G    | 783.45  | 392.23          | 766.42         | 383.71           | 7  |
| 7  | 708.40  | 354.71          | 691.38         | 346.19           | K    | 726.43  | 363.72          | 709.40         | 355.20           | 6  |
| 8  | 765.43  | 383.22          | 748.40         | 374.70           | G    | 530.30  | 265.66          | 513.28         | 257.14           | 5  |
| 9  | 822.45  | 411.73          | 805.42         | 403.21           | G    | 473.28  | 237.15          | 456.26         | 228.63           | 4  |
| 10 | 893.48  | 447.25          | 876.46         | 438.73           | A    | 416.26  | 208.63          | 399.24         | 200.12           | 3  |
| 11 | 1063.59 | 532.30          | 1046.56        | 523.79           | K    | 345.22  | 173.12          | 328.20         | 164.60           | 2  |
| 12 |         |                 |                |                  | R    | 175.12  | 88.06           | 158.09         | 79.55            | 1  |

# GLGK<sub>cr</sub>GGAK<sub>ac</sub>R H4K12

MS/MS Fragmentation of **GLGKGGAKR**

Found in **gi|28173560**, histone H4 [Homo sapiens]

Match to Query 3009: 952.547334 from(477.280943,2+)

Click mouse within plot area to zoom in by factor of two about that point

Or,   to  Da

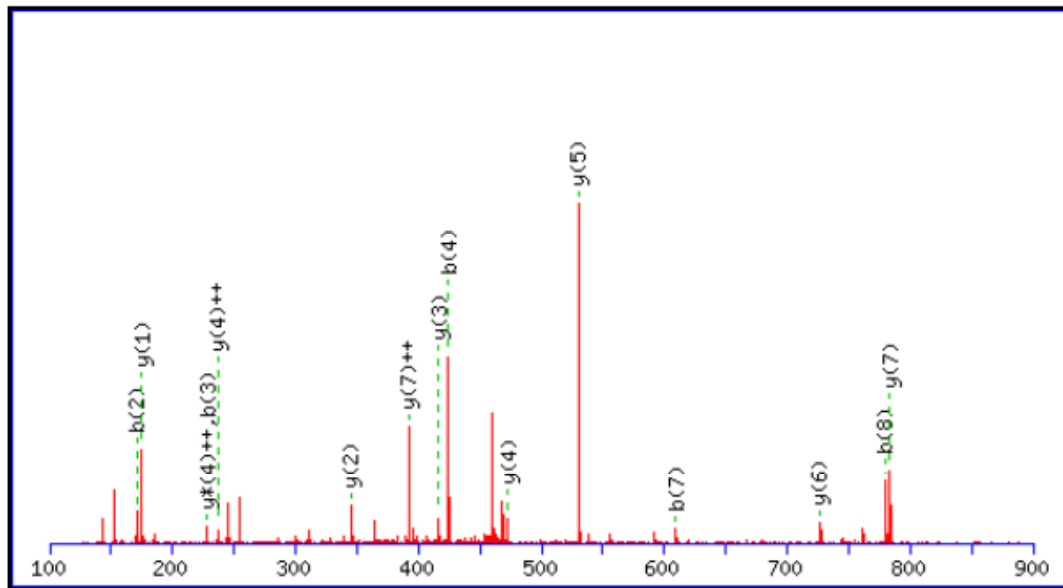

Monoisotopic mass of neutral peptide Mr(calc): 952.55

Variable modifications:

K4 : Crotonoyl (K)

K8 : Acetyl (K)

Ions Score: 38 Expect: 0.00028

| # | b      | b <sup>++</sup> | b <sup>*</sup> | b <sup>*++</sup> | Seq. | y      | y <sup>++</sup> | y <sup>*</sup> | y <sup>*++</sup> | # |
|---|--------|-----------------|----------------|------------------|------|--------|-----------------|----------------|------------------|---|
| 1 | 58.03  | 29.52           |                |                  | G    |        |                 |                |                  | 9 |
| 2 | 171.11 | 86.06           |                |                  | L    | 896.53 | 448.77          | 879.50         | 440.26           | 8 |
| 3 | 228.13 | 114.57          |                |                  | G    | 783.45 | 392.23          | 766.42         | 383.71           | 7 |
| 4 | 424.26 | 212.63          | 407.23         | 204.12           | K    | 726.43 | 363.72          | 709.40         | 355.20           | 6 |
| 5 | 481.28 | 241.14          | 464.25         | 232.63           | G    | 530.30 | 265.66          | 513.28         | 257.14           | 5 |
| 6 | 538.30 | 269.65          | 521.27         | 261.14           | G    | 473.28 | 237.15          | 456.26         | 228.63           | 4 |
| 7 | 609.34 | 305.17          | 592.31         | 296.66           | A    | 416.26 | 208.63          | 399.24         | 200.12           | 3 |
| 8 | 779.44 | 390.22          | 762.41         | 381.71           | K    | 345.22 | 173.12          | 328.20         | 164.60           | 2 |
| 9 |        |                 |                |                  | R    | 175.12 | 88.06           | 158.09         | 79.55            | 1 |

# K<sub>cr</sub>ASGPPVSELITK H1.2K33

MS/MS Fragmentation of **KASGPPVSELITK**

Found in **IPI00217465**, Tax\_Id=9606 Gene\_Symbol=HIST1H1C Histone H1.2

Match to Query 16919: 1393.780554 from(697.897553,2+)

Click mouse within plot area to zoom in by factor of two about that point

Or,   to  Da

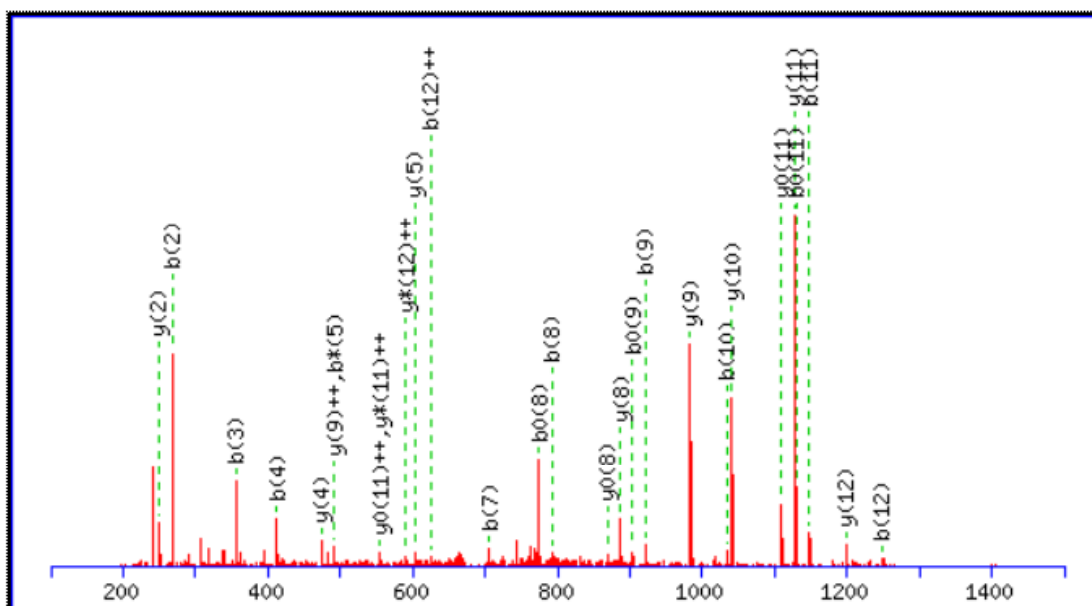

Monoisotopic mass of neutral peptide Mr(calc): 1393.78

Variable modifications:

K1 : Crotonoyl (K)

Ions Score: 46 Expect: 0.0087

| #  | b       | b <sup>++</sup> | b <sup>*</sup> | b <sup>*++</sup> | b <sup>0</sup> | b <sup>0++</sup> | Seq. | y       | y <sup>++</sup> | y <sup>*</sup> | y <sup>*++</sup> | y <sup>0</sup> | y <sup>0++</sup> | #  |
|----|---------|-----------------|----------------|------------------|----------------|------------------|------|---------|-----------------|----------------|------------------|----------------|------------------|----|
| 1  | 197.13  | 99.07           | 180.10         | 90.55            |                |                  | K    |         |                 |                |                  |                |                  | 13 |
| 2  | 268.17  | 134.59          | 251.14         | 126.07           |                |                  | A    | 1198.67 | 599.84          | 1181.64        | 591.32           | 1180.66        | 590.83           | 12 |
| 3  | 355.20  | 178.10          | 338.17         | 169.59           | 337.19         | 169.10           | S    | 1127.63 | 564.32          | 1110.60        | 555.81           | 1109.62        | 555.31           | 11 |
| 4  | 412.22  | 206.61          | 395.19         | 198.10           | 394.21         | 197.61           | G    | 1040.60 | 520.80          | 1023.57        | 512.29           | 1022.59        | 511.80           | 10 |
| 5  | 509.27  | 255.14          | 492.25         | 246.63           | 491.26         | 246.13           | P    | 983.58  | 492.29          | 966.55         | 483.78           | 965.57         | 483.29           | 9  |
| 6  | 606.32  | 303.67          | 589.30         | 295.15           | 588.31         | 294.66           | P    | 886.52  | 443.77          | 869.50         | 435.25           | 868.51         | 434.76           | 8  |
| 7  | 705.39  | 353.20          | 688.37         | 344.69           | 687.38         | 344.19           | V    | 789.47  | 395.24          | 772.45         | 386.73           | 771.46         | 386.23           | 7  |
| 8  | 792.43  | 396.72          | 775.40         | 388.20           | 774.41         | 387.71           | S    | 690.40  | 345.71          | 673.38         | 337.19           | 672.39         | 336.70           | 6  |
| 9  | 921.47  | 461.24          | 904.44         | 452.72           | 903.46         | 452.23           | E    | 603.37  | 302.19          | 586.34         | 293.68           | 585.36         | 293.18           | 5  |
| 10 | 1034.55 | 517.78          | 1017.53        | 509.27           | 1016.54        | 508.77           | L    | 474.33  | 237.67          | 457.30         | 229.15           | 456.32         | 228.66           | 4  |
| 11 | 1147.64 | 574.32          | 1130.61        | 565.81           | 1129.63        | 565.32           | I    | 361.24  | 181.13          | 344.22         | 172.61           | 343.23         | 172.12           | 3  |
| 12 | 1248.68 | 624.85          | 1231.66        | 616.33           | 1230.67        | 615.84           | T    | 248.16  | 124.58          | 231.13         | 116.07           | 230.15         | 115.58           | 2  |
| 13 |         |                 |                |                  |                |                  | K    | 147.11  | 74.06           | 130.09         | 65.55            |                |                  | 1  |

K<sub>cr</sub>ALAAAGYDVEK

H1.2K63

MS/MS Fragmentation of **KALAAAGYDVEK**  
Found in **gi|197692471**, histone H1.2 [Homo sapiens]

Match to Query 10969: 1302.683014 from(652.348783,2+)

Click mouse within plot area to zoom in by factor of two about that point

Or, Plot from  to  Da

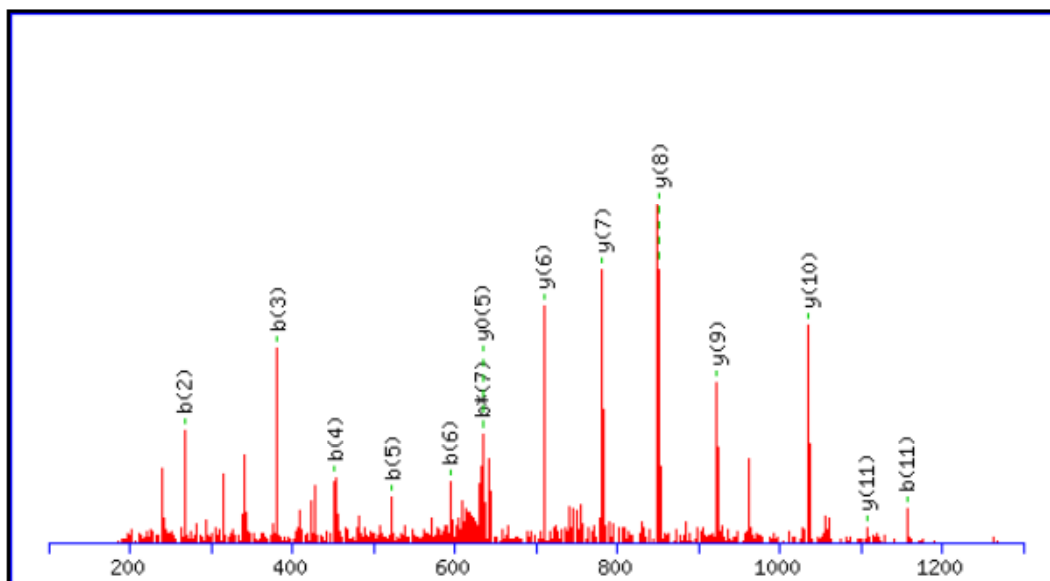

Monoisotopic mass of neutral peptide Mr(calc): 1302.68

Variable modifications:

K1 : Crotonoyl (K)

Ions Score: 35 Expect: 0.0012

| #  | b       | b <sup>++</sup> | b <sup>+</sup> | b <sup>++</sup> | b <sup>0</sup> | b <sup>0++</sup> | Seq. | y       | y <sup>++</sup> | y <sup>+</sup> | y <sup>++</sup> | y <sup>0</sup> | y <sup>0++</sup> | #  |
|----|---------|-----------------|----------------|-----------------|----------------|------------------|------|---------|-----------------|----------------|-----------------|----------------|------------------|----|
| 1  | 197.13  | 99.07           | 180.10         | 90.55           |                |                  | K    |         |                 |                |                 |                |                  | 12 |
| 2  | 268.17  | 134.59          | 251.14         | 126.07          |                |                  | A    | 1107.57 | 554.29          | 1090.54        | 545.77          | 1089.56        | 545.28           | 11 |
| 3  | 381.25  | 191.13          | 364.22         | 182.62          |                |                  | L    | 1036.53 | 518.77          | 1019.50        | 510.26          | 1018.52        | 509.76           | 10 |
| 4  | 452.29  | 226.65          | 435.26         | 218.13          |                |                  | A    | 923.45  | 462.23          | 906.42         | 453.71          | 905.44         | 453.22           | 9  |
| 5  | 523.32  | 262.17          | 506.30         | 253.65          |                |                  | A    | 852.41  | 426.71          | 835.38         | 418.20          | 834.40         | 417.70           | 8  |
| 6  | 594.36  | 297.68          | 577.33         | 289.17          |                |                  | A    | 781.37  | 391.19          | 764.35         | 382.68          | 763.36         | 382.18           | 7  |
| 7  | 651.38  | 326.19          | 634.36         | 317.68          |                |                  | G    | 710.34  | 355.67          | 693.31         | 347.16          | 692.32         | 346.67           | 6  |
| 8  | 814.45  | 407.73          | 797.42         | 399.21          |                |                  | Y    | 653.31  | 327.16          | 636.29         | 318.65          | 635.30         | 318.16           | 5  |
| 9  | 929.47  | 465.24          | 912.45         | 456.73          | 911.46         | 456.23           | D    | 490.25  | 245.63          | 473.22         | 237.12          | 472.24         | 236.62           | 4  |
| 10 | 1028.54 | 514.77          | 1011.51        | 506.26          | 1010.53        | 505.77           | V    | 375.22  | 188.12          | 358.20         | 179.60          | 357.21         | 179.11           | 3  |
| 11 | 1157.58 | 579.30          | 1140.56        | 570.78          | 1139.57        | 570.29           | E    | 276.16  | 138.58          | 259.13         | 130.07          | 258.14         | 129.58           | 2  |
| 12 |         |                 |                |                 |                |                  | K    | 147.11  | 74.06           | 130.09         | 65.55           |                |                  | 1  |

# LGLK<sub>cr</sub>SLVSK H1.2K84

MS/MS Fragmentation of **LGLKSLVSK**

Found in **gi|197692471**, histone H1.2 [Homo sapiens]

Match to Query 3882: 1011.633334 from(506.823943,2+)

Click mouse within plot area to zoom in by factor of two about that point

Or,   to  Da

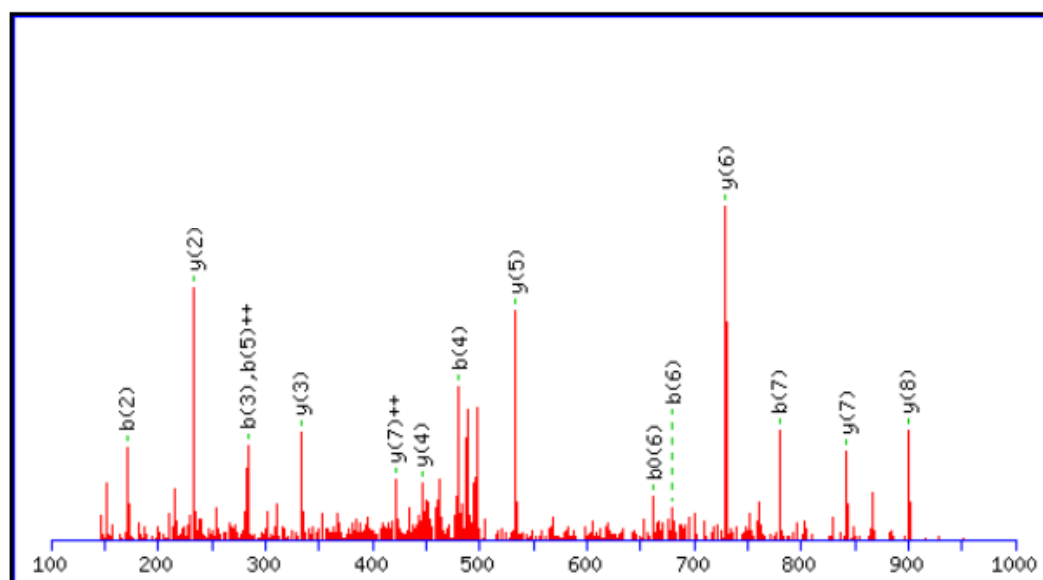

Monoisotopic mass of neutral peptide Mr(calc): 1011.63

Variable modifications:

K4 : Crotonoyl (K)

Ions Score: 55 Expect: 8.4e-006

| # | b      | b <sup>++</sup> | b <sup>*</sup> | b <sup>*++</sup> | b <sup>0</sup> | b <sup>0++</sup> | Seq. | y      | y <sup>++</sup> | y <sup>*</sup> | y <sup>*++</sup> | y <sup>0</sup> | y <sup>0++</sup> | # |
|---|--------|-----------------|----------------|------------------|----------------|------------------|------|--------|-----------------|----------------|------------------|----------------|------------------|---|
| 1 | 114.09 | 57.55           |                |                  |                |                  | L    |        |                 |                |                  |                |                  | 9 |
| 2 | 171.11 | 86.06           |                |                  |                |                  | G    | 899.56 | 450.28          | 882.53         | 441.77           | 881.55         | 441.28           | 8 |
| 3 | 284.20 | 142.60          |                |                  |                |                  | L    | 842.53 | 421.77          | 825.51         | 413.26           | 824.52         | 412.77           | 7 |
| 4 | 480.32 | 240.66          | 463.29         | 232.15           |                |                  | K    | 729.45 | 365.23          | 712.42         | 356.72           | 711.44         | 356.22           | 6 |
| 5 | 567.35 | 284.18          | 550.32         | 275.67           | 549.34         | 275.17           | S    | 533.33 | 267.17          | 516.30         | 258.66           | 515.32         | 258.16           | 5 |
| 6 | 680.43 | 340.72          | 663.41         | 332.21           | 662.42         | 331.72           | L    | 446.30 | 223.65          | 429.27         | 215.14           | 428.29         | 214.65           | 4 |
| 7 | 779.50 | 390.25          | 762.48         | 381.74           | 761.49         | 381.25           | V    | 333.21 | 167.11          | 316.19         | 158.60           | 315.20         | 158.10           | 3 |
| 8 | 866.53 | 433.77          | 849.51         | 425.26           | 848.52         | 424.77           | S    | 234.14 | 117.58          | 217.12         | 109.06           | 216.13         | 108.57           | 2 |
| 9 |        |                 |                |                  |                |                  | K    | 147.11 | 74.06           | 130.09         | 65.55            |                |                  | 1 |

SLVSK<sub>cr</sub>GTLVQTK      H1.2K89

MS/MS Fragmentation of **SLVSKGTLVQTK**

Found in **gi|22770677**, histone H1 [Homo sapiens]

Match to Query 20406: 1327.773354 from(664.893953,2+)

Click mouse within plot area to zoom in by factor of two about that point

Or,   to  Da

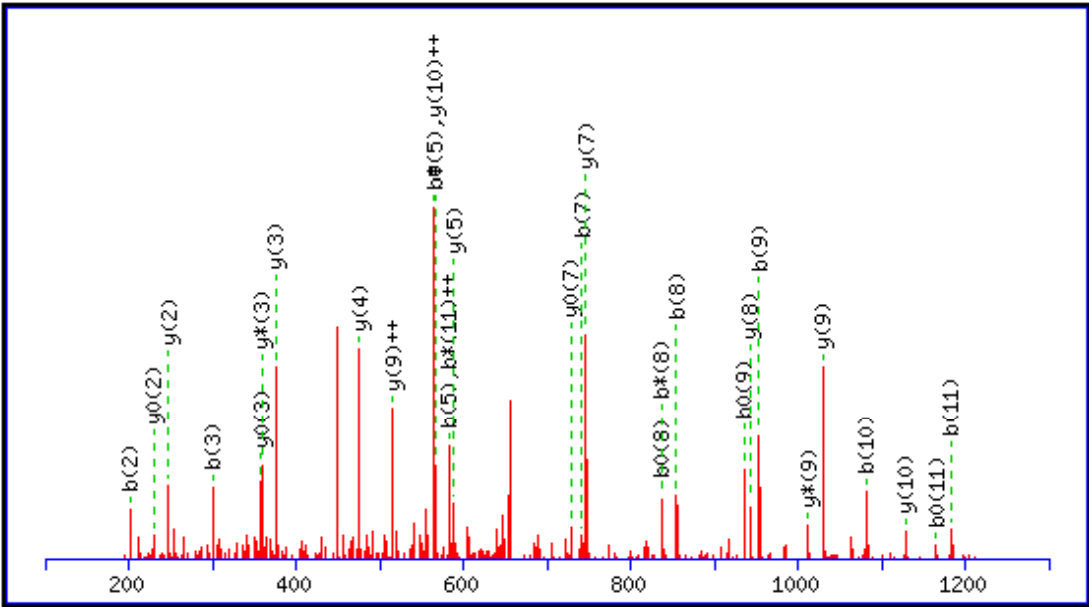

**Monoisotopic mass of neutral peptide Mr(calc):** 1327.77

**Variable modifications:**

**K5** : Crotonoyl (K)

**Ions Score:** 53    **Expect:** 0.0012

| #  | b       | b <sup>++</sup> | b <sup>+</sup> | b <sup>++</sup> | b <sup>0</sup> | b <sup>0++</sup> | Seq. | y       | y <sup>++</sup> | y <sup>+</sup> | y <sup>++</sup> | y <sup>0</sup> | y <sup>0++</sup> | #  |
|----|---------|-----------------|----------------|-----------------|----------------|------------------|------|---------|-----------------|----------------|-----------------|----------------|------------------|----|
| 1  | 88.04   | 44.52           |                |                 | 70.03          | 35.52            | S    |         |                 |                |                 |                |                  | 12 |
| 2  | 201.12  | 101.07          |                |                 | 183.11         | 92.06            | L    | 1241.75 | 621.38          | 1224.72        | 612.86          | 1223.74        | 612.37           | 11 |
| 3  | 300.19  | 150.60          |                |                 | 282.18         | 141.59           | V    | 1128.66 | 564.83          | 1111.64        | 556.32          | 1110.65        | 555.83           | 10 |
| 4  | 387.22  | 194.12          |                |                 | 369.21         | 185.11           | S    | 1029.59 | 515.30          | 1012.57        | 506.79          | 1011.58        | 506.30           | 9  |
| 5  | 583.34  | 292.18          | 566.32         | 283.66          | 565.33         | 283.17           | K    | 942.56  | 471.78          | 925.54         | 463.27          | 924.55         | 462.78           | 8  |
| 6  | 640.37  | 320.69          | 623.34         | 312.17          | 622.36         | 311.68           | G    | 746.44  | 373.72          | 729.41         | 365.21          | 728.43         | 364.72           | 7  |
| 7  | 741.41  | 371.21          | 724.39         | 362.70          | 723.40         | 362.21           | T    | 689.42  | 345.21          | 672.39         | 336.70          | 671.41         | 336.21           | 6  |
| 8  | 854.50  | 427.75          | 837.47         | 419.24          | 836.49         | 418.75           | L    | 588.37  | 294.69          | 571.34         | 286.18          | 570.36         | 285.68           | 5  |
| 9  | 953.57  | 477.29          | 936.54         | 468.77          | 935.56         | 468.28           | V    | 475.29  | 238.15          | 458.26         | 229.63          | 457.28         | 229.14           | 4  |
| 10 | 1081.63 | 541.32          | 1064.60        | 532.80          | 1063.61        | 532.31           | Q    | 376.22  | 188.61          | 359.19         | 180.10          | 358.21         | 179.61           | 3  |
| 11 | 1182.67 | 591.84          | 1165.65        | 583.33          | 1164.66        | 582.83           | T    | 248.16  | 124.58          | 231.13         | 116.07          | 230.15         | 115.58           | 2  |
| 12 |         |                 |                |                 |                |                  | K    | 147.11  | 74.06           | 130.09         | 65.55           |                |                  | 1  |

# GTLVQTK<sub>cr</sub>GTGASGSFK H1.2K96

MS/MS Fragmentation of **GTLVQTKGTGASGSFK**

Found in **gi197692471**, histone H1.2 [Homo sapiens]

Match to Query 16649: 1605.839514 from(803.927033,2+)

Click mouse within plot area to zoom in by factor of two about that point

Or,   to  Da

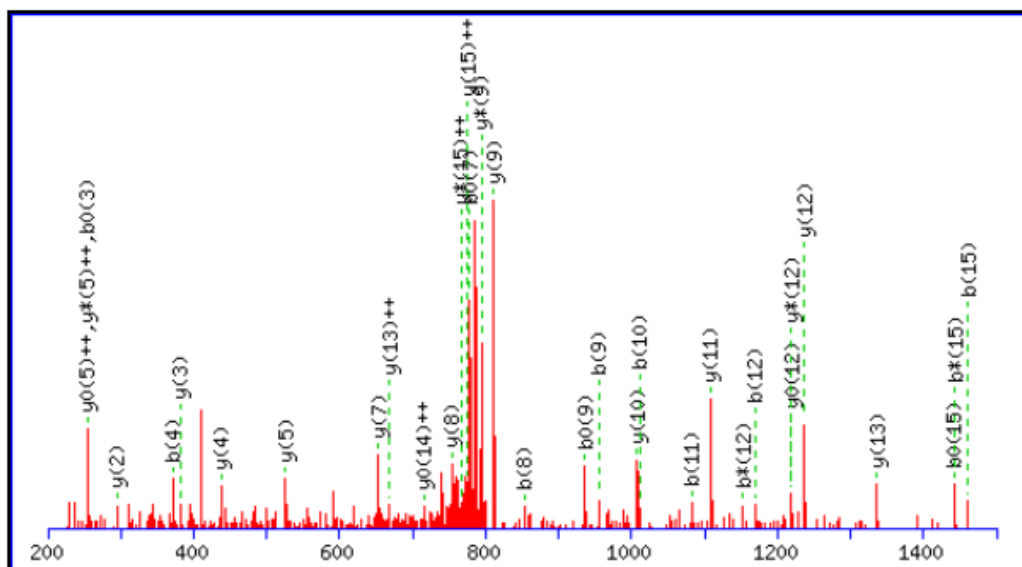

Monoisotopic mass of neutral peptide Mr(calc): 1605.84

Variable modifications:

K7 : Crotonoyl (K)

Ions Score: 51 Expect: 1.8e-005

| #  | b       | b <sup>++</sup> | b <sup>+</sup> | b <sup>++</sup> | b <sup>0</sup> | b <sup>0++</sup> | Seq. | y       | y <sup>++</sup> | y <sup>+</sup> | y <sup>++</sup> | y <sup>0</sup> | y <sup>0++</sup> | #  |
|----|---------|-----------------|----------------|-----------------|----------------|------------------|------|---------|-----------------|----------------|-----------------|----------------|------------------|----|
| 1  | 58.03   | 29.52           |                |                 |                |                  | G    |         |                 |                |                 |                |                  | 16 |
| 2  | 159.08  | 80.04           |                |                 | 141.07         | 71.04            | T    | 1549.82 | 775.41          | 1532.80        | 766.90          | 1531.81        | 766.41           | 15 |
| 3  | 272.16  | 136.58          |                |                 | 254.15         | 127.58           | L    | 1448.77 | 724.89          | 1431.75        | 716.38          | 1430.76        | 715.89           | 14 |
| 4  | 371.23  | 186.12          |                |                 | 353.22         | 177.11           | V    | 1335.69 | 668.35          | 1318.66        | 659.84          | 1317.68        | 659.34           | 13 |
| 5  | 499.29  | 250.15          | 482.26         | 241.63          | 481.28         | 241.14           | Q    | 1236.62 | 618.81          | 1219.60        | 610.30          | 1218.61        | 609.81           | 12 |
| 6  | 600.34  | 300.67          | 583.31         | 292.16          | 582.32         | 291.67           | T    | 1108.56 | 554.79          | 1091.54        | 546.27          | 1090.55        | 545.78           | 11 |
| 7  | 796.46  | 398.73          | 779.43         | 390.22          | 778.45         | 389.73           | K    | 1007.52 | 504.26          | 990.49         | 495.75          | 989.51         | 495.26           | 10 |
| 8  | 853.48  | 427.24          | 836.45         | 418.73          | 835.47         | 418.24           | G    | 811.39  | 406.20          | 794.37         | 397.69          | 793.38         | 397.20           | 9  |
| 9  | 954.53  | 477.77          | 937.50         | 469.25          | 936.51         | 468.76           | T    | 754.37  | 377.69          | 737.35         | 369.18          | 736.36         | 368.68           | 8  |
| 10 | 1011.55 | 506.28          | 994.52         | 497.76          | 993.54         | 497.27           | G    | 653.33  | 327.17          | 636.30         | 318.65          | 635.31         | 318.16           | 7  |
| 11 | 1082.58 | 541.80          | 1065.56        | 533.28          | 1064.57        | 532.79           | A    | 596.30  | 298.66          | 579.28         | 290.14          | 578.29         | 289.65           | 6  |
| 12 | 1169.62 | 585.31          | 1152.59        | 576.80          | 1151.61        | 576.31           | S    | 525.27  | 263.14          | 508.24         | 254.62          | 507.26         | 254.13           | 5  |
| 13 | 1226.64 | 613.82          | 1209.61        | 605.31          | 1208.63        | 604.82           | G    | 438.23  | 219.62          | 421.21         | 211.11          | 420.22         | 210.62           | 4  |
| 14 | 1313.67 | 657.34          | 1296.64        | 648.83          | 1295.66        | 648.33           | S    | 381.21  | 191.11          | 364.19         | 182.60          | 363.20         | 182.10           | 3  |
| 15 | 1460.74 | 730.87          | 1443.71        | 722.36          | 1442.73        | 721.87           | F    | 294.18  | 147.59          | 277.15         | 139.08          |                |                  | 2  |
| 16 |         |                 |                |                 |                |                  | K    | 147.11  | 74.06           | 130.09         | 65.55           |                |                  | 1  |

**AK<sub>cr</sub>KPAAATVTK****H1.2K158**MS/MS Fragmentation of **AKKPAAATVTK**Found in **gi|197692471**, histone H1.2 [Homo sapiens]

Match to Query 5827: 1152.687784 from(577.351168,2+)

Click mouse within plot area to zoom in by factor of two about that point

Or,   to  Da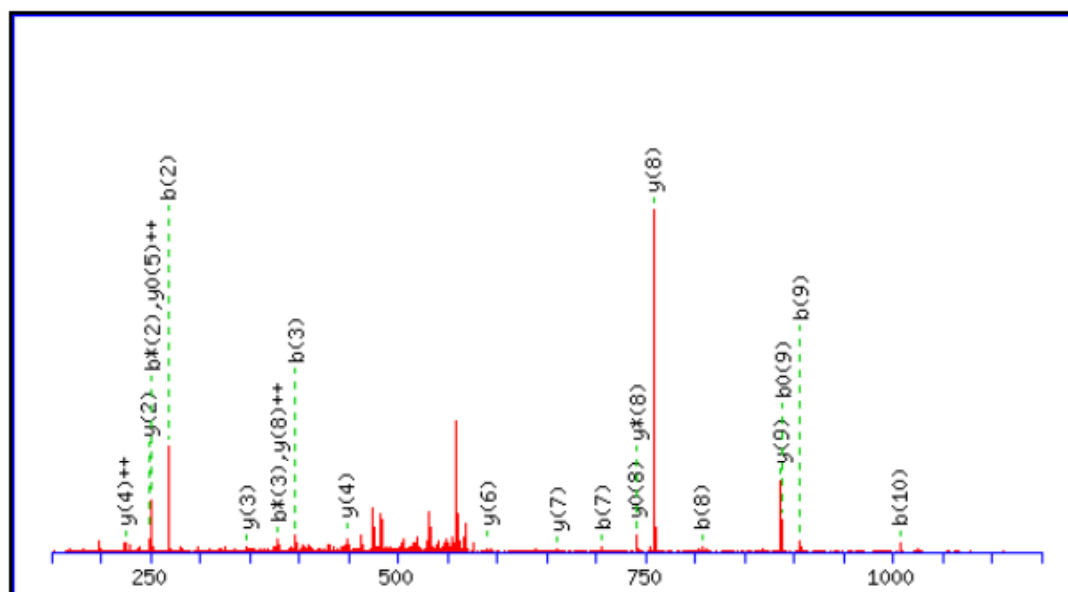

Monoisotopic mass of neutral peptide Mr(calc): 1152.69

Variable modifications:

K2 : Crotonoyl (K)

Ions Score: 33 Expect: 0.0014

| #  | b       | b <sup>++</sup> | b <sup>*</sup> | b <sup>++</sup> * | b <sup>0</sup> | b <sup>0++</sup> | Seq. | y       | y <sup>++</sup> | y <sup>*</sup> | y <sup>++</sup> * | y <sup>0</sup> | y <sup>0++</sup> | #  |
|----|---------|-----------------|----------------|-------------------|----------------|------------------|------|---------|-----------------|----------------|-------------------|----------------|------------------|----|
| 1  | 72.04   | 36.53           |                |                   |                |                  | A    |         |                 |                |                   |                |                  | 11 |
| 2  | 268.17  | 134.59          | 251.14         | 126.07            |                |                  | K    | 1082.66 | 541.83          | 1065.63        | 533.32            | 1064.65        | 532.83           | 10 |
| 3  | 396.26  | 198.63          | 379.23         | 190.12            |                |                  | K    | 886.54  | 443.77          | 869.51         | 435.26            | 868.53         | 434.77           | 9  |
| 4  | 493.31  | 247.16          | 476.29         | 238.65            |                |                  | P    | 758.44  | 379.72          | 741.41         | 371.21            | 740.43         | 370.72           | 8  |
| 5  | 564.35  | 282.68          | 547.32         | 274.17            |                |                  | A    | 661.39  | 331.20          | 644.36         | 322.68            | 643.38         | 322.19           | 7  |
| 6  | 635.39  | 318.20          | 618.36         | 309.68            |                |                  | A    | 590.35  | 295.68          | 573.32         | 287.17            | 572.34         | 286.67           | 6  |
| 7  | 706.42  | 353.72          | 689.40         | 345.20            |                |                  | A    | 519.31  | 260.16          | 502.29         | 251.65            | 501.30         | 251.16           | 5  |
| 8  | 807.47  | 404.24          | 790.45         | 395.73            | 789.46         | 395.23           | T    | 448.28  | 224.64          | 431.25         | 216.13            | 430.27         | 215.64           | 4  |
| 9  | 906.54  | 453.77          | 889.51         | 445.26            | 888.53         | 444.77           | V    | 347.23  | 174.12          | 330.20         | 165.60            | 329.22         | 165.11           | 3  |
| 10 | 1007.59 | 504.30          | 990.56         | 495.78            | 989.58         | 495.29           | T    | 248.16  | 124.58          | 231.13         | 116.07            | 230.15         | 115.58           | 2  |
| 11 |         |                 |                |                   |                |                  | K    | 147.11  | 74.06           | 130.09         | 65.55             |                |                  | 1  |

# KPAAATVTK<sub>cr</sub>K H1.2K167

MS/MS Fragmentation of **KPAAATVTKK**

Found in **IPI00217465**, Tax\_Id=9606 Gene\_Symbol=HIST1H1C Histone H1.2

Match to Query 8480: 1081.648714 from(541.831633,2+)

Click mouse within plot area to zoom in by factor of two about that point

Or,  150 to  Da

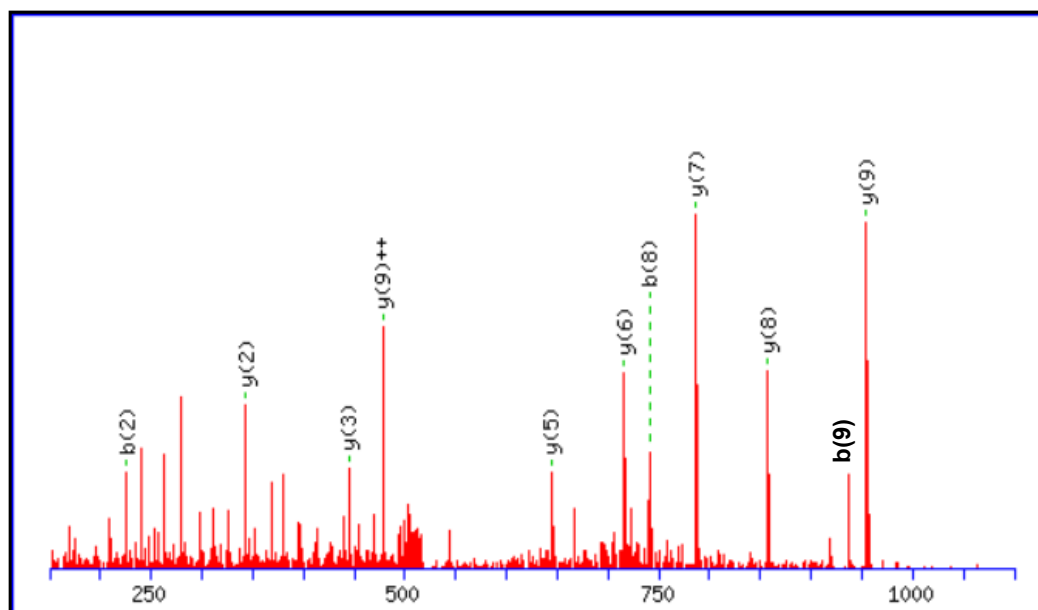

Monoisotopic mass of neutral peptide Mr(calc): 1081.65

Variable modifications:

**K9** : Crotonoyl (K)

Ions Score: 45 Expect: 0.0071

| #  | b             | b <sup>++</sup> | b*     | b* <sup>++</sup> | b <sup>0</sup> | b <sup>0++</sup> | Seq. | y             | y <sup>++</sup> | y*     | y* <sup>++</sup> | y <sup>0</sup> | y <sup>0++</sup> | #  |
|----|---------------|-----------------|--------|------------------|----------------|------------------|------|---------------|-----------------|--------|------------------|----------------|------------------|----|
| 1  | 129.10        | 65.05           | 112.08 | 56.54            |                |                  | K    |               |                 |        |                  |                |                  | 10 |
| 2  | <b>226.15</b> | 113.58          | 209.13 | 105.07           |                |                  | P    | <b>954.56</b> | <b>477.78</b>   | 937.54 | 469.27           | 936.55         | 468.78           | 9  |
| 3  | 297.19        | 149.10          | 280.17 | 140.59           |                |                  | A    | <b>857.51</b> | 429.26          | 840.48 | 420.74           | 839.50         | 420.25           | 8  |
| 4  | 368.23        | 184.62          | 351.20 | 176.10           |                |                  | A    | <b>786.47</b> | 393.74          | 769.45 | 385.23           | 768.46         | 384.73           | 7  |
| 5  | 439.27        | 220.14          | 422.24 | 211.62           |                |                  | A    | <b>715.43</b> | 358.22          | 698.41 | 349.71           | 697.42         | 349.22           | 6  |
| 6  | 540.31        | 270.66          | 523.29 | 262.15           | 522.30         | 261.66           | T    | <b>644.40</b> | 322.70          | 627.37 | 314.19           | 626.39         | 313.70           | 5  |
| 7  | 639.38        | 320.19          | 622.36 | 311.68           | 621.37         | 311.19           | V    | 543.35        | 272.18          | 526.32 | 263.67           | 525.34         | 263.17           | 4  |
| 8  | <b>740.43</b> | 370.72          | 723.40 | 362.21           | 722.42         | 361.71           | T    | <b>444.28</b> | 222.64          | 427.26 | 214.13           | 426.27         | 213.64           | 3  |
| 9  | <b>836.53</b> | 434.77          | 851.50 | 426.25           | 850.51         | 425.76           | K    | <b>343.23</b> | 172.12          | 326.21 | 163.61           |                |                  | 2  |
| 10 |               |                 |        |                  |                |                  | K    | 215.14        | 108.07          | 198.11 | 99.56            |                |                  | 1  |

K<sub>D4-cr</sub>

GNYAER

H2AK36

MS/MS Fragmentation of **KGNYAER**  
Found in **IPI00081836**, Tax\_Id=9606 Gene\_Symbol=HIST1H2AM;HIST1H2AL;HIST  
Match to Query 2036: 908.464814 from(455.239683,2+)

Click mouse within plot area to zoom in by factor of two about that point  
Or, 

Plot from

100

 to 

900

 Da

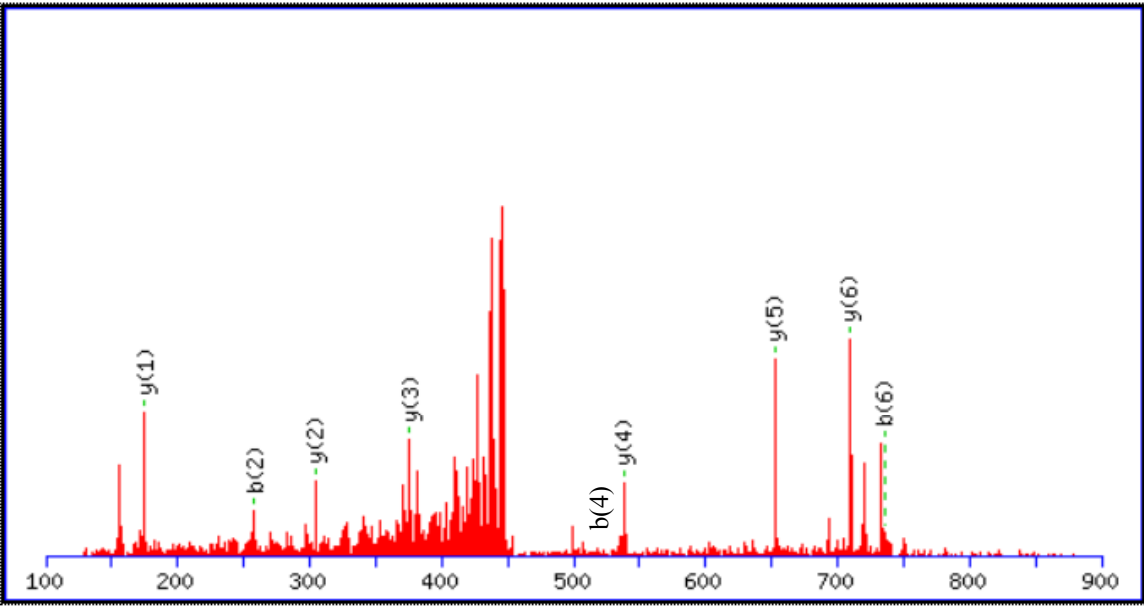

Monoisotopic mass of neutral peptide Mr(calc): 908.47  
Variable modifications:  
K1 : Crotonoyl d4 (K)  
Ions Score: 35 Expect: 1.2

| # | b      | b <sup>++</sup> | b <sup>*</sup> | b <sup>*++</sup> | b <sup>0</sup> | b <sup>0++</sup> | Seq. | y      | y <sup>++</sup> | y <sup>*</sup> | y <sup>*++</sup> | y <sup>0</sup> | y <sup>0++</sup> | # |
|---|--------|-----------------|----------------|------------------|----------------|------------------|------|--------|-----------------|----------------|------------------|----------------|------------------|---|
| 1 | 201.15 | 101.08          | 184.13         | 92.57            |                |                  | K    |        |                 |                |                  |                |                  | 7 |
| 2 | 258.18 | 129.59          | 241.15         | 121.08           |                |                  | G    | 709.33 | 355.17          | 692.30         | 346.65           | 691.32         | 346.16           | 6 |
| 3 | 372.22 | 186.61          | 355.19         | 178.10           |                |                  | N    | 652.30 | 326.66          | 635.28         | 318.14           | 634.29         | 317.65           | 5 |
| 4 | 535.28 | 268.14          | 518.25         | 259.63           |                |                  | Y    | 538.26 | 269.63          | 521.24         | 261.12           | 520.25         | 260.63           | 4 |
| 5 | 606.32 | 303.66          | 589.29         | 295.15           |                |                  | A    | 375.20 | 188.10          | 358.17         | 179.59           | 357.19         | 179.10           | 3 |
| 6 | 735.36 | 368.18          | 718.33         | 359.67           | 717.35         | 359.18           | E    | 304.16 | 152.58          | 287.13         | 144.07           | 286.15         | 143.58           | 2 |
| 7 |        |                 |                |                  |                |                  | R    | 175.12 | 88.06           | 158.09         | 79.55            |                |                  | 1 |

VTIAQGGVLPNIQAVLLPK<sub>D4-cr</sub>K

## H2A K118

MS/MS Fragmentation of **VTIAQGGVLPNIQAVLLPKK**Found in **IPI00081836**, Tax\_Id=9606 Gene\_Symbol=HIST1H2AM;HIST1H2AL;HIST1

Match to Query 9794: 2130.305824 from(1066.160188,2+)

Click mouse within plot area to zoom in by factor of two about that point

Or, Plot from  to  Da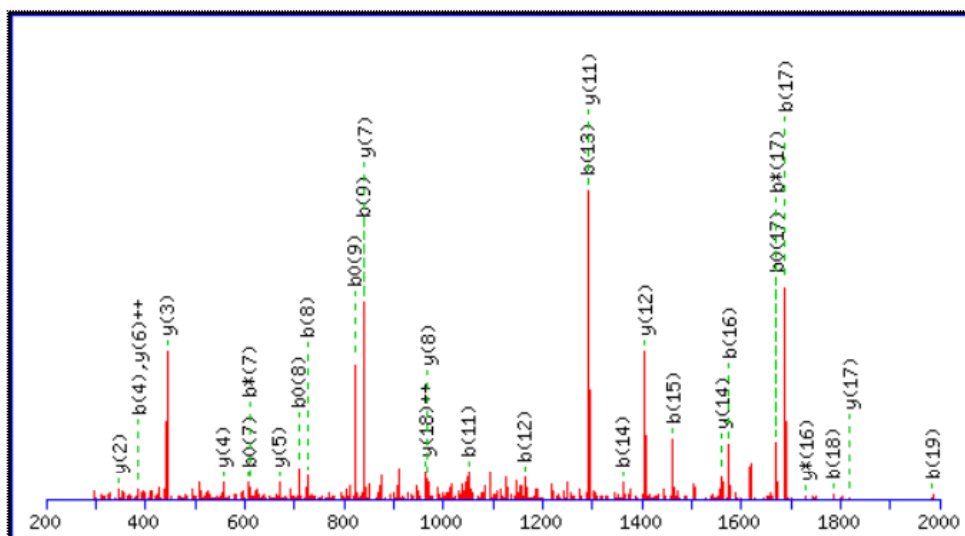

Monoisotopic mass of neutral peptide Mr(calc): 2130.31

Variable modifications:

K19 : Crotonoyl d4 (K)

Ions Score: 67 Expect: 0.0025

| #  | b       | b <sup>++</sup> | b <sup>*</sup> | b <sup>*++</sup> | b <sup>0</sup> | b <sup>0++</sup> | Seq. | y       | y <sup>++</sup> | y <sup>*</sup> | y <sup>*++</sup> | y <sup>0</sup> | y <sup>0++</sup> | #  |
|----|---------|-----------------|----------------|------------------|----------------|------------------|------|---------|-----------------|----------------|------------------|----------------|------------------|----|
| 1  | 100.08  | 50.54           |                |                  |                |                  | V    |         |                 |                |                  |                |                  | 20 |
| 2  | 201.12  | 101.07          |                |                  | 183.11         | 92.06            | T    | 2032.25 | 1016.63         | 2015.22        | 1008.11          | 2014.24        | 1007.62          | 19 |
| 3  | 314.21  | 157.61          |                |                  | 296.20         | 148.60           | I    | 1931.20 | 966.10          | 1914.17        | 957.59           |                |                  | 18 |
| 4  | 385.24  | 193.13          |                |                  | 367.23         | 184.12           | A    | 1818.11 | 909.56          | 1801.09        | 901.05           |                |                  | 17 |
| 5  | 513.30  | 257.16          | 496.28         | 248.64           | 495.29         | 248.15           | Q    | 1747.08 | 874.04          | 1730.05        | 865.53           |                |                  | 16 |
| 6  | 570.32  | 285.67          | 553.30         | 277.15           | 552.31         | 276.66           | G    | 1619.02 | 810.01          | 1601.99        | 801.50           |                |                  | 15 |
| 7  | 627.35  | 314.18          | 610.32         | 305.66           | 609.34         | 305.17           | G    | 1562.00 | 781.50          | 1544.97        | 772.99           |                |                  | 14 |
| 8  | 726.41  | 363.71          | 709.39         | 355.20           | 708.40         | 354.71           | V    | 1504.98 | 752.99          | 1487.95        | 744.48           |                |                  | 13 |
| 9  | 839.50  | 420.25          | 822.47         | 411.74           | 821.49         | 411.25           | L    | 1405.91 | 703.46          | 1388.88        | 694.94           |                |                  | 12 |
| 10 | 936.55  | 468.78          | 919.52         | 460.27           | 918.54         | 459.77           | P    | 1292.82 | 646.92          | 1275.80        | 638.40           |                |                  | 11 |
| 11 | 1050.59 | 525.80          | 1033.57        | 517.29           | 1032.58        | 516.80           | N    | 1195.77 | 598.39          | 1178.74        | 589.88           |                |                  | 10 |
| 12 | 1163.68 | 582.34          | 1146.65        | 573.83           | 1145.67        | 573.34           | I    | 1081.73 | 541.37          | 1064.70        | 532.85           |                |                  | 9  |
| 13 | 1291.74 | 646.37          | 1274.71        | 637.86           | 1273.73        | 637.37           | Q    | 968.64  | 484.83          | 951.62         | 476.31           |                |                  | 8  |
| 14 | 1362.77 | 681.89          | 1345.75        | 673.38           | 1344.76        | 672.89           | A    | 840.59  | 420.80          | 823.56         | 412.28           |                |                  | 7  |
| 15 | 1461.84 | 731.42          | 1444.82        | 722.91           | 1443.83        | 722.42           | V    | 769.55  | 385.28          | 752.52         | 376.76           |                |                  | 6  |
| 16 | 1574.93 | 787.97          | 1557.90        | 779.45           | 1556.92        | 778.96           | L    | 670.48  | 335.74          | 653.45         | 327.23           |                |                  | 5  |
| 17 | 1688.01 | 844.51          | 1670.98        | 836.00           | 1670.00        | 835.50           | L    | 557.40  | 279.20          | 540.37         | 270.69           |                |                  | 4  |
| 18 | 1785.06 | 893.04          | 1768.04        | 884.52           | 1767.05        | 884.03           | P    | 444.31  | 222.66          | 427.29         | 214.15           |                |                  | 3  |
| 19 | 1985.21 | 993.11          | 1968.18        | 984.60           | 1967.20        | 984.10           | K    | 347.26  | 174.13          | 330.23         | 165.62           |                |                  | 2  |
| 20 |         |                 |                |                  |                |                  | K    | 147.11  | 74.06           | 130.09         | 65.55            |                |                  | 1  |

**K<sub>D4-cr</sub>TESHHK**

**H2A K119**

MS/MS Fragmentation of **KTESHHK**

Found in **IPI00081836**, Tax\_Id=9606 Gene\_Symbol=HIST1H2AM;HIST1H2AL;HIST1H2A

Match to Query 2424: 937.490824 from(469.752688,2+)

Click mouse within plot area to zoom in by factor of two about that point

Or,   to  Da

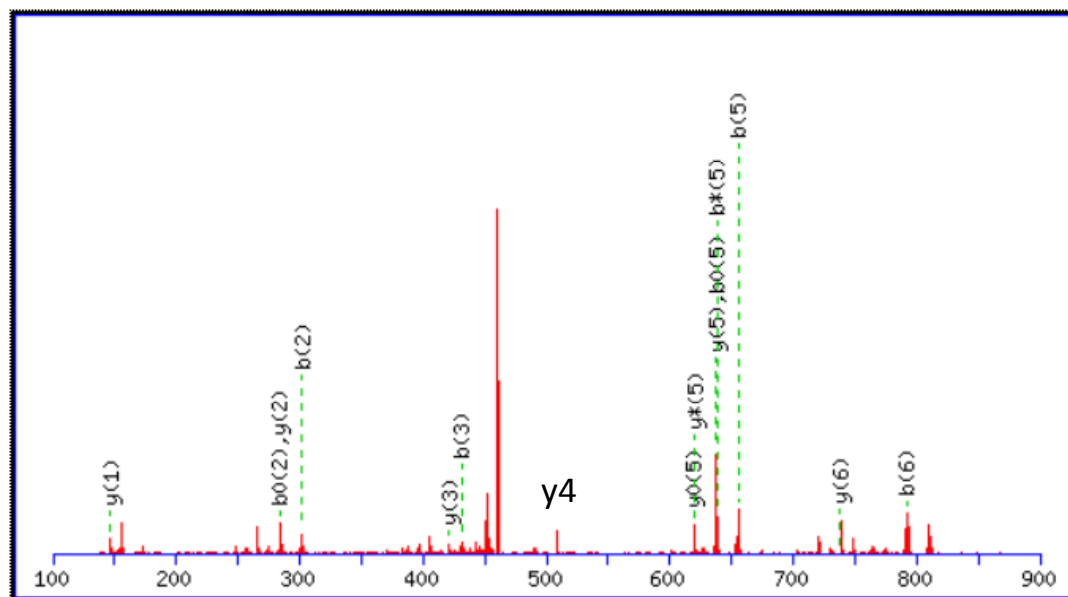

Monoisotopic mass of neutral peptide Mr(calc): 937.49

Variable modifications:

K1 : Crotonoyl d4 (K)

Ions Score: 35 Expect: 1.7

Matches (**Bold Red**): 14/64 fragment ions using 29 most intense peaks

| # | b             | b <sup>++</sup> | b <sup>*</sup> | b <sup>*++</sup> | b <sup>0</sup> | b <sup>0++</sup> | Seq.     | y             | y <sup>++</sup> | y <sup>*</sup> | y <sup>*++</sup> | y <sup>0</sup> | y <sup>0++</sup> | # |
|---|---------------|-----------------|----------------|------------------|----------------|------------------|----------|---------------|-----------------|----------------|------------------|----------------|------------------|---|
| 1 | 201.15        | 101.08          | 184.13         | 92.57            |                |                  | <b>K</b> |               |                 |                |                  |                |                  | 7 |
| 2 | <b>302.20</b> | 151.60          | 285.17         | 143.09           | <b>284.19</b>  | 142.60           | <b>T</b> | <b>738.35</b> | 369.68          | 721.33         | 361.17           | 720.34         | 360.67           | 6 |
| 3 | <b>431.24</b> | 216.13          | 414.22         | 207.61           | 413.23         | 207.12           | <b>E</b> | <b>637.31</b> | 319.16          | <b>620.28</b>  | 310.64           | <b>619.29</b>  | 310.15           | 5 |
| 4 | 518.28        | 259.64          | 501.25         | 251.13           | 500.27         | 250.64           | <b>S</b> | 508.26        | 254.63          | 491.24         | 246.12           | 490.25         | 245.63           | 4 |
| 5 | <b>655.33</b> | 328.17          | <b>638.31</b>  | 319.66           | <b>637.32</b>  | 319.17           | <b>H</b> | <b>421.23</b> | 211.12          | 404.20         | 202.61           |                |                  | 3 |
| 6 | <b>792.39</b> | 396.70          | 775.37         | 388.19           | 774.38         | 387.70           | <b>H</b> | <b>284.17</b> | 142.59          | 267.15         | 134.08           |                |                  | 2 |
| 7 |               |                 |                |                  |                |                  | <b>K</b> | <b>147.11</b> | 74.06           | 130.09         | 65.55            |                |                  | 1 |

KTESHHK<sub>D4-cr</sub>AK

H2A K125

MS/MS Fragmentation of **KTESHHKAK**  
Found in **IPI00081836**, Tax\_Id=9606 Gene\_Symbol=HIST1H2AM;HIST1H2AL;HIST1H  
Match to Query 5130: 1136.622594 from(569.318573,2+)

Click mouse within plot area to zoom in by factor of two about that point  
Or, 

Plot from

150

 to 

1100

 Da

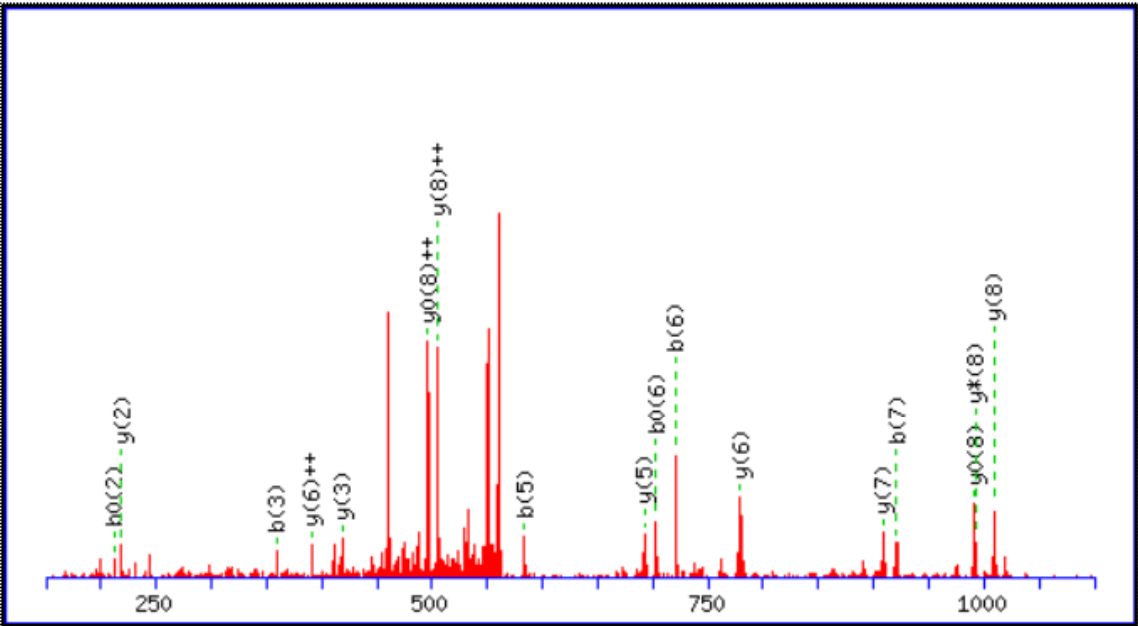

Monoisotopic mass of neutral peptide Mr(calc): 1136.62  
Variable modifications:  
K7 : Crotonoyl d4 (K)  
Ions Score: 33 Expect: 2.9

| # | b      | b <sup>++</sup> | b <sup>*</sup> | b <sup>*++</sup> | b <sup>0</sup> | b <sup>0++</sup> | Seq. | y       | y <sup>++</sup> | y <sup>*</sup> | y <sup>*++</sup> | y <sup>0</sup> | y <sup>0++</sup> | # |
|---|--------|-----------------|----------------|------------------|----------------|------------------|------|---------|-----------------|----------------|------------------|----------------|------------------|---|
| 1 | 129.10 | 65.05           | 112.08         | 56.54            |                |                  | K    |         |                 |                |                  |                |                  | 9 |
| 2 | 230.15 | 115.58          | 213.12         | 107.07           | 212.14         | 106.57           | T    | 1009.54 | 505.27          | 992.51         | 496.76           | 991.53         | 496.27           | 8 |
| 3 | 359.19 | 180.10          | 342.17         | 171.59           | 341.18         | 171.09           | E    | 908.49  | 454.75          | 891.46         | 446.23           | 890.48         | 445.74           | 7 |
| 4 | 446.22 | 223.62          | 429.20         | 215.10           | 428.21         | 214.61           | S    | 779.45  | 390.23          | 762.42         | 381.71           | 761.44         | 381.22           | 6 |
| 5 | 583.28 | 292.15          | 566.26         | 283.63           | 565.27         | 283.14           | H    | 692.41  | 346.71          | 675.39         | 338.20           |                |                  | 5 |
| 6 | 720.34 | 360.67          | 703.32         | 352.16           | 702.33         | 351.67           | H    | 555.36  | 278.18          | 538.33         | 269.67           |                |                  | 4 |
| 7 | 920.49 | 460.75          | 903.46         | 452.23           | 902.48         | 451.74           | K    | 418.30  | 209.65          | 401.27         | 201.14           |                |                  | 3 |
| 8 | 991.53 | 496.27          | 974.50         | 487.75           | 973.52         | 487.26           | A    | 218.15  | 109.58          | 201.12         | 101.07           |                |                  | 2 |
| 9 |        |                 |                |                  |                |                  | K    | 147.11  | 74.06           | 130.09         | 65.55            |                |                  | 1 |

# PEPAK<sub>D4-cr</sub>SAPAPK

# H2BK5

MS/MS Fragmentation of **PEPAKSAPAPK**

Found in **IPI00419833**, Tax\_Id=9606 Gene\_Symbol=HIST1H2BK Histone H2B type 1

Match to Query 5441: 1163.614054 from(582.814303,2+)

Click mouse within plot area to zoom in by factor of two about that point

Or,   to  Da

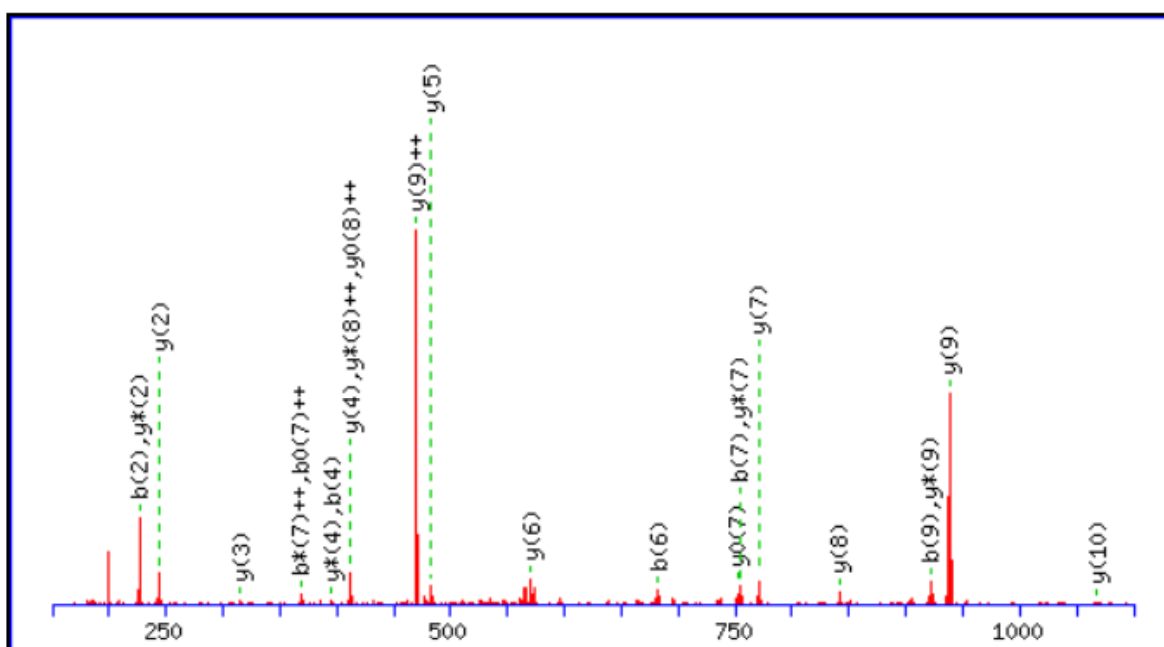

Monoisotopic mass of neutral peptide Mr(calc): 1163.65

Variable modifications:

K5 : Crotonoyl d4 (K)

Ions Score: 52 Expect: 0.039

| #  | b             | b <sup>++</sup> | b <sup>*</sup> | b <sup>*++</sup> | b <sup>0</sup> | b <sup>0++</sup> | Seq. | y              | y <sup>++</sup> | y <sup>*</sup> | y <sup>*++</sup> | y <sup>0</sup> | y <sup>0++</sup> | #  |
|----|---------------|-----------------|----------------|------------------|----------------|------------------|------|----------------|-----------------|----------------|------------------|----------------|------------------|----|
| 1  | 98.06         | 49.53           |                |                  |                |                  | P    |                |                 |                |                  |                |                  | 11 |
| 2  | <b>227.10</b> | 114.05          |                |                  | 209.09         | 105.05           | E    | <b>1067.60</b> | 534.31          | 1050.58        | 525.79           | 1049.59        | 525.30           | 10 |
| 3  | 324.16        | 162.58          |                |                  | 306.14         | 153.58           | P    | <b>938.56</b>  | <b>469.78</b>   | <b>921.53</b>  | 461.27           | 920.55         | 460.78           | 9  |
| 4  | <b>395.19</b> | 198.10          |                |                  | 377.18         | 189.09           | A    | <b>841.51</b>  | 421.26          | 824.48         | <b>412.74</b>    | 823.50         | <b>412.25</b>    | 8  |
| 5  | 595.34        | 298.17          | 578.31         | 289.66           | 577.33         | 289.17           | K    | <b>770.47</b>  | 385.74          | <b>753.44</b>  | 377.23           | <b>752.46</b>  | 376.73           | 7  |
| 6  | <b>682.37</b> | 341.69          | 665.34         | 333.18           | 664.36         | 332.68           | S    | <b>570.32</b>  | 285.67          | 553.30         | 277.15           | 552.31         | 276.66           | 6  |
| 7  | <b>753.41</b> | 377.21          | 736.38         | <b>368.69</b>    | 735.40         | <b>368.20</b>    | A    | <b>483.29</b>  | 242.15          | 466.27         | 233.64           |                |                  | 5  |
| 8  | 850.46        | 425.73          | 833.43         | 417.22           | 832.45         | 416.73           | P    | <b>412.26</b>  | 206.63          | <b>395.23</b>  | 198.12           |                |                  | 4  |
| 9  | <b>921.50</b> | 461.25          | 904.47         | 452.74           | 903.49         | 452.25           | A    | <b>315.20</b>  | 158.10          | 298.18         | 149.59           |                |                  | 3  |
| 10 | 1018.55       | 509.78          | 1001.52        | 501.27           | 1000.54        | 500.77           | P    | <b>244.17</b>  | 122.59          | <b>227.14</b>  | 114.07           |                |                  | 2  |
| 11 |               |                 |                |                  |                |                  | K    | 147.11         | 74.06           | 130.09         | 65.55            |                |                  | 1  |

**SAPAPK<sub>D4-cr</sub>K<sub>ac</sub>GSK<sub>ac</sub>K<sub>ac</sub>AVTK**

**H2BK11**

MS/MS Fragmentation of **SAPAPKKGSKKAVTK**

Found in **IPI00303133**, Tax\_Id=9606 Gene\_Symbol=HIST1H2BH Histone H2B type 1-H

Match to Query 17353: 1694.988314 from(848.501433,2+)

Click mouse within plot area to zoom in by factor of two about that point

Or, Plot from  to  Da

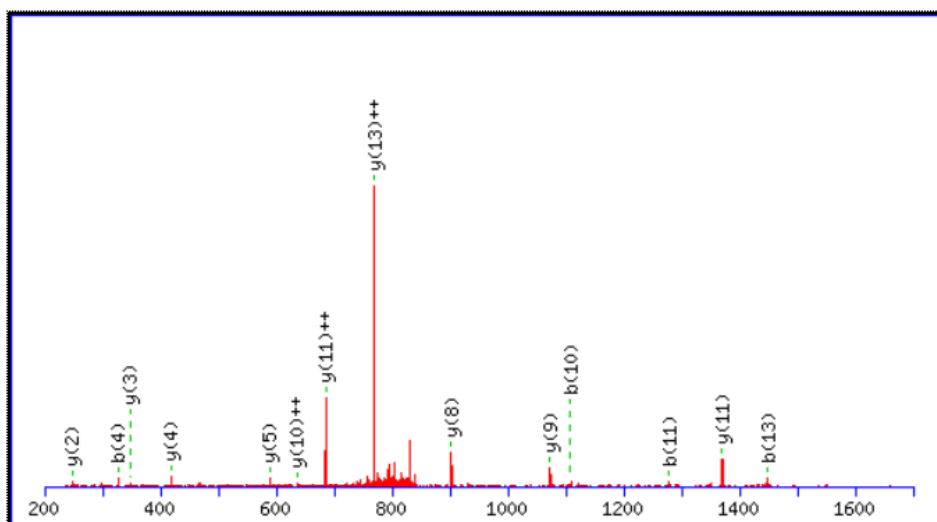

Monoisotopic mass of neutral peptide Mr(calc): 1694.99

Variable modifications:

K6 : Crotonoyl d4 (K)

K7 : Acetyl (K)

K10 : Acetyl (K)

K11 : Acetyl (K)

Ions Score: 33 Expect: 7.2

| #  | b       | b <sup>++</sup> | b <sup>*</sup> | b <sup>*++</sup> | b <sup>0</sup> | b <sup>0++</sup> | Seq. | y       | y <sup>++</sup> | y <sup>*</sup> | y <sup>*++</sup> | y <sup>0</sup> | y <sup>0++</sup> | #  |
|----|---------|-----------------|----------------|------------------|----------------|------------------|------|---------|-----------------|----------------|------------------|----------------|------------------|----|
| 1  | 88.04   | 44.52           |                |                  | 70.03          | 35.52            | S    |         |                 |                |                  |                |                  | 15 |
| 2  | 159.08  | 80.04           |                |                  | 141.07         | 71.04            | A    | 1608.96 | 804.98          | 1591.94        | 796.47           | 1590.95        | 795.98           | 14 |
| 3  | 256.13  | 128.57          |                |                  | 238.12         | 119.56           | P    | 1537.93 | 769.47          | 1520.90        | 760.95           | 1519.91        | 760.46           | 13 |
| 4  | 327.17  | 164.09          |                |                  | 309.16         | 155.08           | A    | 1440.87 | 720.94          | 1423.85        | 712.43           | 1422.86        | 711.93           | 12 |
| 5  | 424.22  | 212.61          |                |                  | 406.21         | 203.61           | P    | 1369.84 | 685.42          | 1352.81        | 676.91           | 1351.82        | 676.42           | 11 |
| 6  | 624.37  | 312.69          | 607.34         | 304.17           | 606.35         | 303.68           | K    | 1272.78 | 636.89          | 1255.76        | 628.38           | 1254.77        | 627.89           | 10 |
| 7  | 794.47  | 397.74          | 777.44         | 389.23           | 776.46         | 388.73           | K    | 1072.64 | 536.82          | 1055.61        | 528.31           | 1054.63        | 527.82           | 9  |
| 8  | 851.49  | 426.25          | 834.47         | 417.74           | 833.48         | 417.24           | G    | 902.53  | 451.77          | 885.50         | 443.26           | 884.52         | 442.76           | 8  |
| 9  | 938.52  | 469.77          | 921.50         | 461.25           | 920.51         | 460.76           | S    | 845.51  | 423.26          | 828.48         | 414.74           | 827.50         | 414.25           | 7  |
| 10 | 1108.63 | 554.82          | 1091.60        | 546.31           | 1090.62        | 545.81           | K    | 758.48  | 379.74          | 741.45         | 371.23           | 740.47         | 370.74           | 6  |
| 11 | 1278.74 | 639.87          | 1261.71        | 631.36           | 1260.72        | 630.87           | K    | 588.37  | 294.69          | 571.34         | 286.18           | 570.36         | 285.68           | 5  |
| 12 | 1349.77 | 675.39          | 1332.75        | 666.88           | 1331.76        | 666.38           | A    | 418.27  | 209.64          | 401.24         | 201.12           | 400.26         | 200.63           | 4  |
| 13 | 1448.84 | 724.92          | 1431.81        | 716.41           | 1430.83        | 715.92           | V    | 347.23  | 174.12          | 330.20         | 165.60           | 329.22         | 165.11           | 3  |
| 14 | 1549.89 | 775.45          | 1532.86        | 766.93           | 1531.88        | 766.44           | T    | 248.16  | 124.58          | 231.13         | 116.07           | 230.15         | 115.58           | 2  |
| 15 |         |                 |                |                  |                |                  | K    | 147.11  | 74.06           | 130.09         | 65.55            |                |                  | 1  |

K<sub>D4-cr</sub>GSK<sub>ac</sub>K<sub>ac</sub>AVTK<sub>ac</sub>AQK

H2BK12

MS/MS Fragmentation of **KGSKKAVTKAQK**Found in **IPI00303133**, Tax\_Id=9606 Gene\_Symbol=HIST1H2BH Histone H2B type 1-

Match to Query 8018: 1470.868074 from(736.441313,2+)

Click mouse within plot area to zoom in by factor of two about that point

Or,   to  Da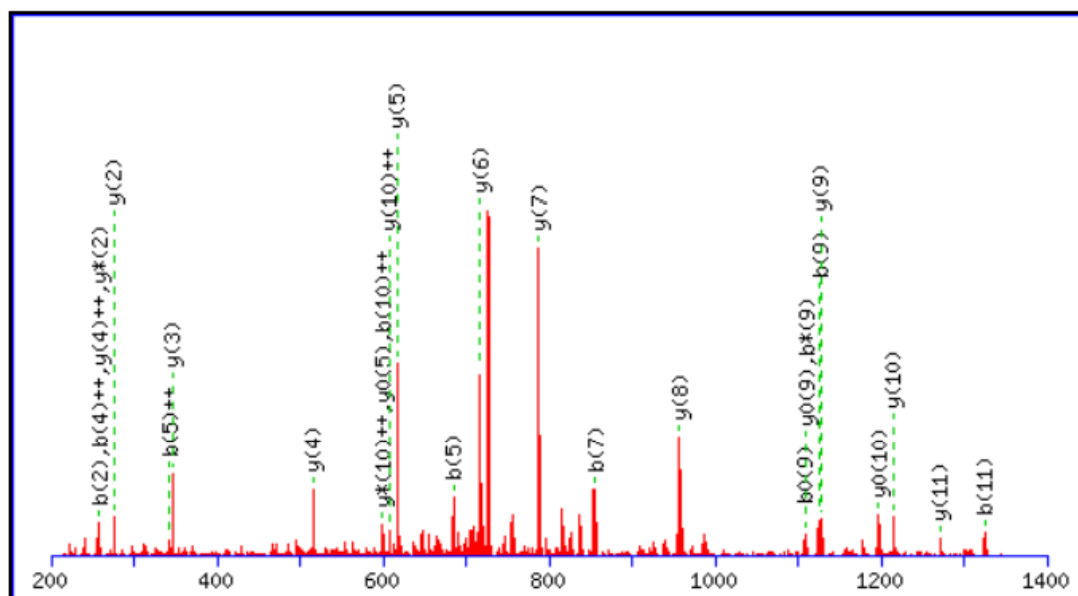

Monoisotopic mass of neutral peptide Mr(calc): 1470.87

Variable modifications:

K1 : Crotonoyl d4 (K)

K4 : Acetyl (K)

K5 : Acetyl (K)

K9 : Acetyl (K)

Ions Score: 57 Expect: 0.018

| #  | b       | b <sup>++</sup> | b <sup>*</sup> | b <sup>*++</sup> | b <sup>0</sup> | b <sup>0++</sup> | Seq. | y       | y <sup>++</sup> | y <sup>*</sup> | y <sup>*++</sup> | y <sup>0</sup> | y <sup>0++</sup> | #  |
|----|---------|-----------------|----------------|------------------|----------------|------------------|------|---------|-----------------|----------------|------------------|----------------|------------------|----|
| 1  | 201.15  | 101.08          | 184.13         | 92.57            |                |                  | K    |         |                 |                |                  |                |                  | 12 |
| 2  | 258.18  | 129.59          | 241.15         | 121.08           |                |                  | G    | 1271.73 | 636.37          | 1254.71        | 627.86           | 1253.72        | 627.36           | 11 |
| 3  | 345.21  | 173.11          | 328.18         | 164.59           | 327.20         | 164.10           | S    | 1214.71 | 607.86          | 1197.68        | 599.35           | 1196.70        | 598.85           | 10 |
| 4  | 515.31  | 258.16          | 498.29         | 249.65           | 497.30         | 249.15           | K    | 1127.68 | 564.34          | 1110.65        | 555.83           | 1109.67        | 555.34           | 9  |
| 5  | 685.42  | 343.21          | 668.39         | 334.70           | 667.41         | 334.21           | K    | 957.57  | 479.29          | 940.55         | 470.78           | 939.56         | 470.28           | 8  |
| 6  | 756.46  | 378.73          | 739.43         | 370.22           | 738.44         | 369.73           | A    | 787.47  | 394.24          | 770.44         | 385.72           | 769.46         | 385.23           | 7  |
| 7  | 855.52  | 428.27          | 838.50         | 419.75           | 837.51         | 419.26           | V    | 716.43  | 358.72          | 699.40         | 350.21           | 698.42         | 349.71           | 6  |
| 8  | 956.57  | 478.79          | 939.54         | 470.28           | 938.56         | 469.78           | T    | 617.36  | 309.18          | 600.34         | 300.67           | 599.35         | 300.18           | 5  |
| 9  | 1126.68 | 563.84          | 1109.65        | 555.33           | 1108.67        | 554.84           | K    | 516.31  | 258.66          | 499.29         | 250.15           |                |                  | 4  |
| 10 | 1197.71 | 599.36          | 1180.69        | 590.85           | 1179.70        | 590.36           | A    | 346.21  | 173.61          | 329.18         | 165.09           |                |                  | 3  |
| 11 | 1325.77 | 663.39          | 1308.75        | 654.88           | 1307.76        | 654.38           | Q    | 275.17  | 138.09          | 258.14         | 129.58           |                |                  | 2  |
| 12 |         |                 |                |                  |                |                  | K    | 147.11  | 74.06           | 130.09         | 65.55            |                |                  | 1  |

K<sub>D4-cr</sub>AVTK<sub>ac</sub>AQK

H2BK16

MS/MS Fragmentation of **KAVTKAQK**

Found in **IPI00303133**, Tax\_Id=9606 Gene\_Symbol=HIST1H2BH Histone H2B type 1-H

Match to Query 3041: 986.604894 from(494.309723,2+)

Click mouse within plot area to zoom in by factor of two about that point

Or,   to  Da

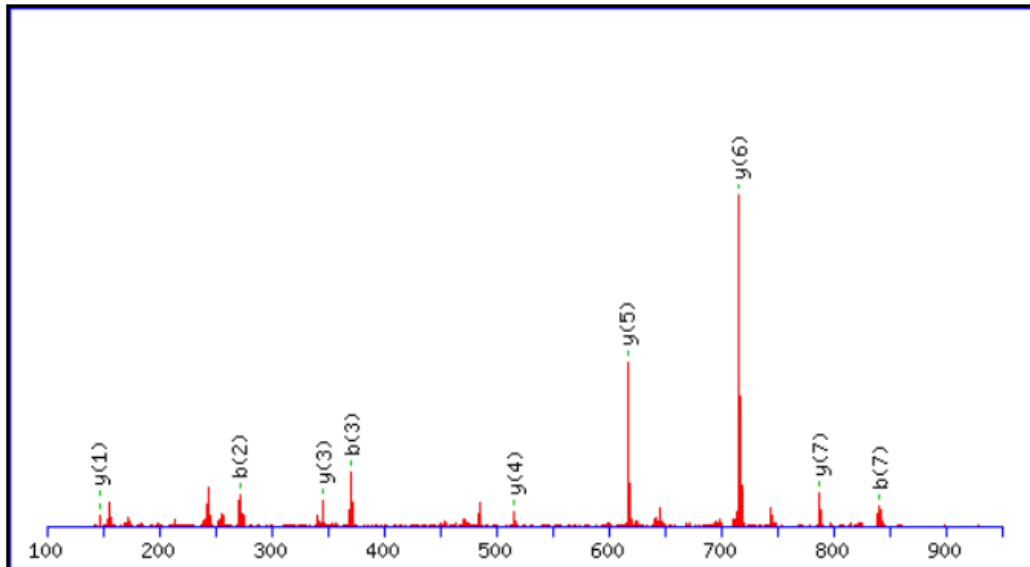

Monoisotopic mass of neutral peptide Mr(calc): 986.61

Variable modifications:

K1 : Crotonoyl d4 (K)

K5 : Acetyl (K)

Ions Score: 33 Expect: 4

| # | b      | b <sup>++</sup> | b <sup>*</sup> | b <sup>*++</sup> | b <sup>0</sup> | b <sup>0++</sup> | Seq. | y      | y <sup>++</sup> | y <sup>*</sup> | y <sup>*++</sup> | y <sup>0</sup> | y <sup>0++</sup> | # |
|---|--------|-----------------|----------------|------------------|----------------|------------------|------|--------|-----------------|----------------|------------------|----------------|------------------|---|
| 1 | 201.15 | 101.08          | 184.13         | 92.57            |                |                  | K    |        |                 |                |                  |                |                  | 8 |
| 2 | 272.19 | 136.60          | 255.16         | 128.09           |                |                  | A    | 787.47 | 394.24          | 770.44         | 385.72           | 769.46         | 385.23           | 7 |
| 3 | 371.26 | 186.13          | 354.23         | 177.62           |                |                  | V    | 716.43 | 358.72          | 699.40         | 350.21           | 698.42         | 349.71           | 6 |
| 4 | 472.31 | 236.66          | 455.28         | 228.14           | 454.30         | 227.65           | T    | 617.36 | 309.18          | 600.34         | 300.67           | 599.35         | 300.18           | 5 |
| 5 | 642.41 | 321.71          | 625.39         | 313.20           | 624.40         | 312.70           | K    | 516.31 | 258.66          | 499.29         | 250.15           |                |                  | 4 |
| 6 | 713.45 | 357.23          | 696.42         | 348.72           | 695.44         | 348.22           | A    | 346.21 | 173.61          | 329.18         | 165.09           |                |                  | 3 |
| 7 | 841.51 | 421.26          | 824.48         | 412.74           | 823.50         | 412.25           | Q    | 275.17 | 138.09          | 258.14         | 129.58           |                |                  | 2 |
| 8 |        |                 |                |                  |                |                  | K    | 147.11 | 74.06           | 130.09         | 65.55            |                |                  | 1 |

KAVTK<sub>D4-cr</sub>AQK

H2BK20

MS/MS Fragmentation of **KAVTKAQK**

Found in **IP100303133**, Tax\_Id=9606 Gene\_Symbol=HIST1H2BH Histone H2B type 1

Match to Query 2521: 944.594334 from(473.304443,2+)

Click mouse within plot area to zoom in by factor of two about that point

Or,   to  Da

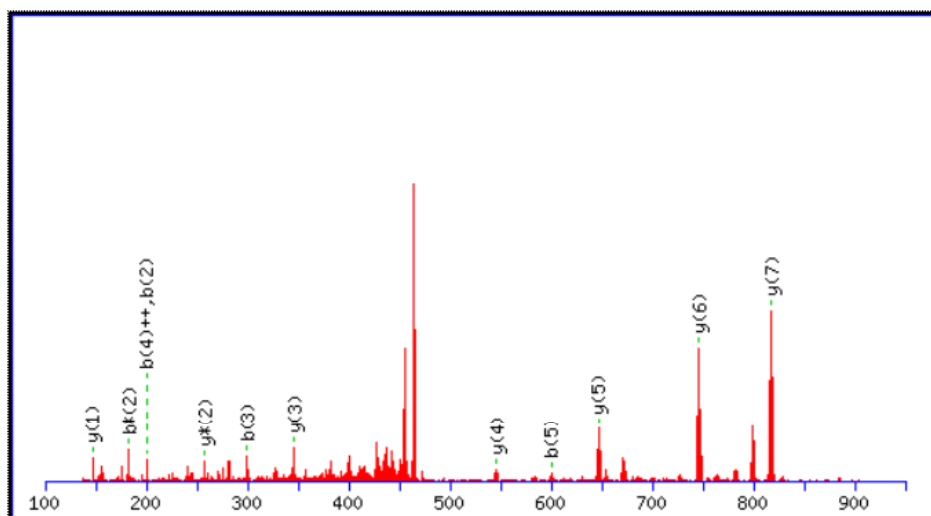

Monoisotopic mass of neutral peptide Mr(calc): 944.60

Variable modifications:

K5 : Crotonoyl d4 (K)

Ions Score: 46 Expect: 0.2

| # | b      | b <sup>++</sup> | b <sup>*</sup> | b <sup>*++</sup> | b <sup>0</sup> | b <sup>0++</sup> | Seq. | y      | y <sup>++</sup> | y <sup>*</sup> | y <sup>*++</sup> | y <sup>0</sup> | y <sup>0++</sup> | # |
|---|--------|-----------------|----------------|------------------|----------------|------------------|------|--------|-----------------|----------------|------------------|----------------|------------------|---|
| 1 | 129.10 | 65.05           | 112.08         | 56.54            |                |                  | K    |        |                 |                |                  |                |                  | 8 |
| 2 | 200.14 | 100.57          | 183.11         | 92.06            |                |                  | A    | 817.51 | 409.26          | 800.48         | 400.74           | 799.50         | 400.25           | 7 |
| 3 | 299.21 | 150.11          | 282.18         | 141.59           |                |                  | V    | 746.47 | 373.74          | 729.44         | 365.23           | 728.46         | 364.73           | 6 |
| 4 | 400.26 | 200.63          | 383.23         | 192.12           | 382.24         | 191.63           | T    | 647.40 | 324.20          | 630.38         | 315.69           | 629.39         | 315.20           | 5 |
| 5 | 600.40 | 300.70          | 583.38         | 292.19           | 582.39         | 291.70           | K    | 546.35 | 273.68          | 529.33         | 265.17           |                |                  | 4 |
| 6 | 671.44 | 336.22          | 654.41         | 327.71           | 653.43         | 327.22           | A    | 346.21 | 173.61          | 329.18         | 165.09           |                |                  | 3 |
| 7 | 799.50 | 400.25          | 782.47         | 391.74           | 781.49         | 391.25           | Q    | 275.17 | 138.09          | 258.14         | 129.58           |                |                  | 2 |
| 8 |        |                 |                |                  |                |                  | K    | 147.11 | 74.06           | 130.09         | 65.55            |                |                  | 1 |

K<sub>D4-cr</sub>ESYSVYVYK

H2BK34

MS/MS Fragmentation of **KESYSVYVYK**

Found in **IPI00303133**, Tax\_Id=9606 Gene\_Symbol=HIST1H2BH Histone H2B type 1-H

Match to Query 7201: 1336.683144 from(669.348848,2+)

Click mouse within plot area to zoom in by factor of two about that point

Or,   to  Da

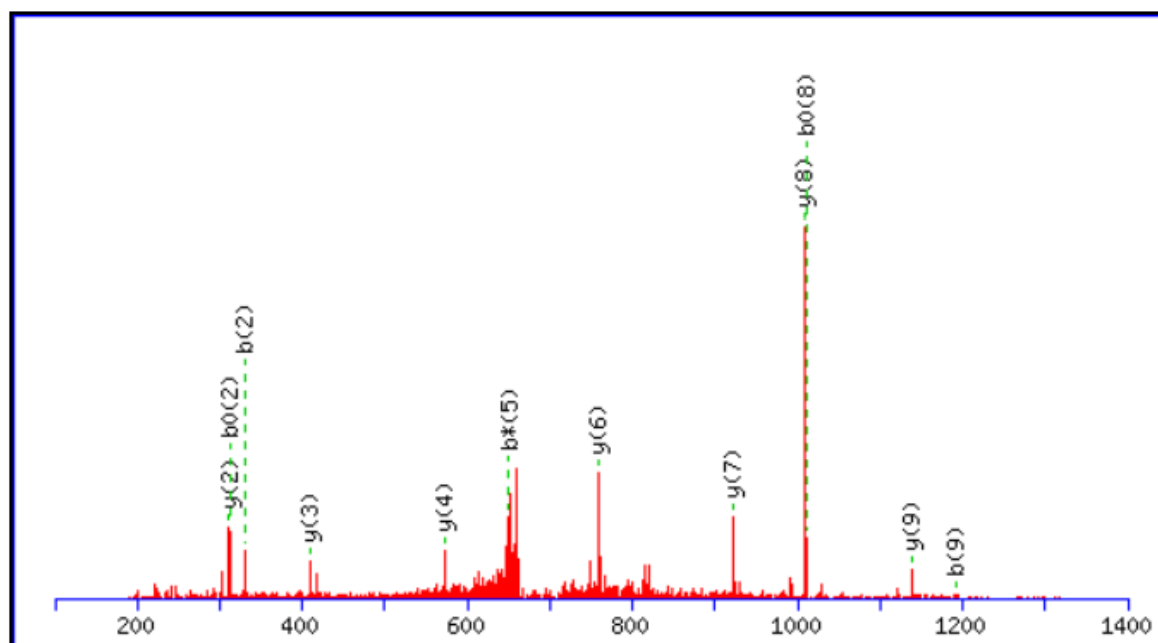

Monoisotopic mass of neutral peptide Mr(calc): 1336.69

Variable modifications:

K1 : Crotonoyl d4 (K)

Ions Score: 48 Expect: 0.13

| #  | b       | b <sup>++</sup> | b <sup>*</sup> | b <sup>*++</sup> | b <sup>0</sup> | b <sup>0++</sup> | Seq. | y       | y <sup>++</sup> | y <sup>*</sup> | y <sup>*++</sup> | y <sup>0</sup> | y <sup>0++</sup> | #  |
|----|---------|-----------------|----------------|------------------|----------------|------------------|------|---------|-----------------|----------------|------------------|----------------|------------------|----|
| 1  | 201.15  | 101.08          | 184.13         | 92.57            |                |                  | K    |         |                 |                |                  |                |                  | 10 |
| 2  | 330.20  | 165.60          | 313.17         | 157.09           | 312.19         | 156.60           | E    | 1137.55 | 569.28          | 1120.52        | 560.76           | 1119.54        | 560.27           | 9  |
| 3  | 417.23  | 209.12          | 400.20         | 200.60           | 399.22         | 200.11           | S    | 1008.50 | 504.76          | 991.48         | 496.24           | 990.49         | 495.75           | 8  |
| 4  | 580.29  | 290.65          | 563.26         | 282.14           | 562.28         | 281.64           | Y    | 921.47  | 461.24          | 904.45         | 452.73           | 903.46         | 452.23           | 7  |
| 5  | 667.32  | 334.17          | 650.30         | 325.65           | 649.31         | 325.16           | S    | 758.41  | 379.71          | 741.38         | 371.19           | 740.40         | 370.70           | 6  |
| 6  | 766.39  | 383.70          | 749.37         | 375.19           | 748.38         | 374.69           | V    | 671.38  | 336.19          | 654.35         | 327.68           |                |                  | 5  |
| 7  | 929.46  | 465.23          | 912.43         | 456.72           | 911.44         | 456.23           | Y    | 572.31  | 286.66          | 555.28         | 278.14           |                |                  | 4  |
| 8  | 1028.52 | 514.77          | 1011.50        | 506.25           | 1010.51        | 505.76           | V    | 409.24  | 205.13          | 392.22         | 196.61           |                |                  | 3  |
| 9  | 1191.59 | 596.30          | 1174.56        | 587.78           | 1173.58        | 587.29           | Y    | 310.18  | 155.59          | 293.15         | 147.08           |                |                  | 2  |
| 10 |         |                 |                |                  |                |                  | K    | 147.11  | 74.06           | 130.09         | 65.55            |                |                  | 1  |

**KQLATK<sub>D4-cr</sub>AAR**

**H3K23**

MS/MS Fragmentation of **KQLATKAAR**

Found in **IPI00455457**, Tax\_Id=9606 Gene\_Symbol=- Histone H3

Match to Query 5641: 1057.655554 from(529.835053,2+)

Click mouse within plot area to zoom in by factor of two about that point

Or, Plot from  to  Da

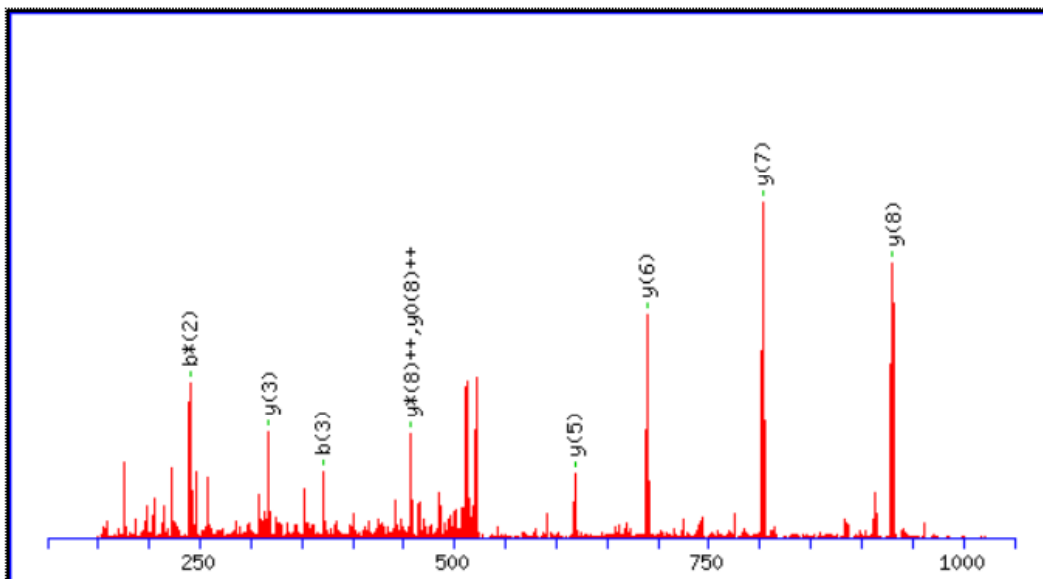

Monoisotopic mass of neutral peptide Mr(calc): 1057.65

Variable modifications:

K6 : Crotonoyl d4 (K)

Ions Score: 35 Expect: 3.3

| # | b      | b <sup>++</sup> | b <sup>*</sup> | b <sup>*++</sup> | b <sup>0</sup> | b <sup>0++</sup> | Seq. | y      | y <sup>++</sup> | y <sup>*</sup> | y <sup>*++</sup> | y <sup>0</sup> | y <sup>0++</sup> | # |
|---|--------|-----------------|----------------|------------------|----------------|------------------|------|--------|-----------------|----------------|------------------|----------------|------------------|---|
| 1 | 129.10 | 65.05           | 112.08         | 56.54            |                |                  | K    |        |                 |                |                  |                |                  | 9 |
| 2 | 257.16 | 129.08          | 240.13         | 120.57           |                |                  | Q    | 930.57 | 465.79          | 913.54         | 457.27           | 912.56         | 456.78           | 8 |
| 3 | 370.24 | 185.63          | 353.22         | 177.11           |                |                  | L    | 802.51 | 401.76          | 785.48         | 393.24           | 784.50         | 392.75           | 7 |
| 4 | 441.28 | 221.14          | 424.26         | 212.63           |                |                  | A    | 689.42 | 345.22          | 672.40         | 336.70           | 671.41         | 336.21           | 6 |
| 5 | 542.33 | 271.67          | 525.30         | 263.16           | 524.32         | 262.66           | T    | 618.39 | 309.70          | 601.36         | 301.18           | 600.38         | 300.69           | 5 |
| 6 | 742.48 | 371.74          | 725.45         | 363.23           | 724.47         | 362.74           | K    | 517.34 | 259.17          | 500.31         | 250.66           |                |                  | 4 |
| 7 | 813.51 | 407.26          | 796.49         | 398.75           | 795.50         | 398.25           | A    | 317.19 | 159.10          | 300.17         | 150.59           |                |                  | 3 |
| 8 | 884.55 | 442.78          | 867.52         | 434.27           | 866.54         | 433.77           | A    | 246.16 | 123.58          | 229.13         | 115.07           |                |                  | 2 |
| 9 |        |                 |                |                  |                |                  | R    | 175.12 | 88.06           | 158.09         | 79.55            |                |                  | 1 |

**YQK<sub>D4-cr</sub>STELLIR****H3K56**MS/MS Fragmentation of **YQKSTELLIR**Found in **IPI00455457**, Tax\_Id=9606 Gene\_Symbol=- Histone H3

Match to Query 13899: 1321.755164 from(661.884858,2+)

Click mouse within plot area to zoom in by factor of two about that point

Or,   to  Da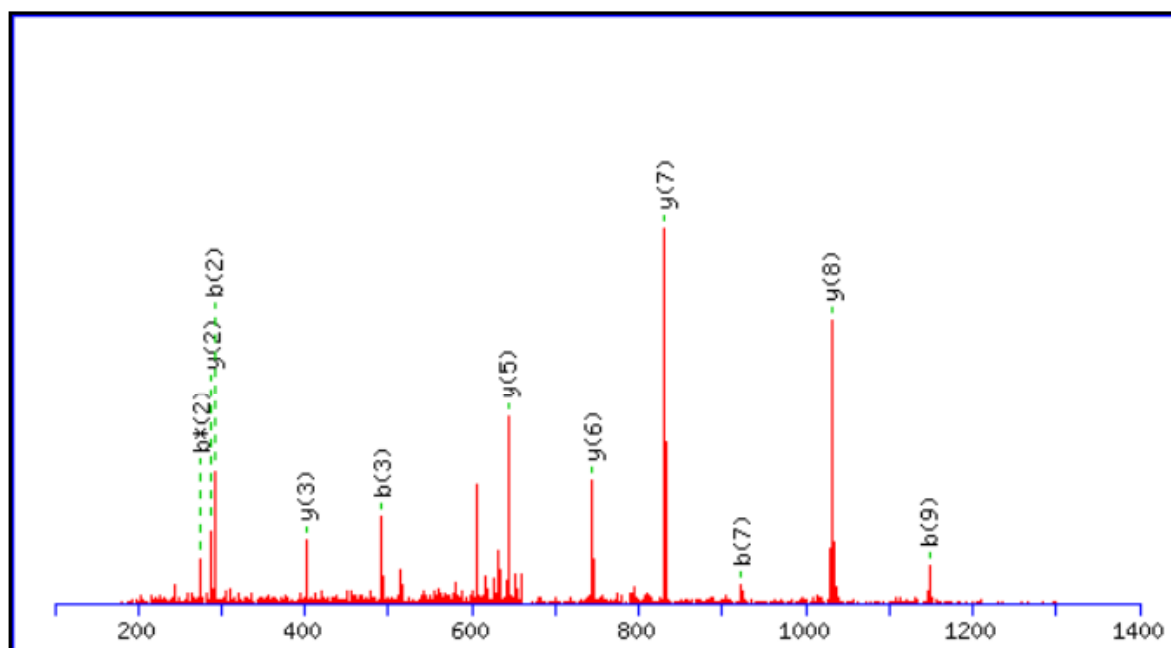

Monoisotopic mass of neutral peptide Mr(calc): 1321.75

Variable modifications:

K3 : Crotonoyl d4 (K)

Ions Score: 34 Expect: 3.8

| #  | b       | b <sup>++</sup> | b <sup>*</sup> | b <sup>*++</sup> | b <sup>0</sup> | b <sup>0++</sup> | Seq. | y       | y <sup>++</sup> | y <sup>*</sup> | y <sup>*++</sup> | y <sup>0</sup> | y <sup>0++</sup> | #  |
|----|---------|-----------------|----------------|------------------|----------------|------------------|------|---------|-----------------|----------------|------------------|----------------|------------------|----|
| 1  | 164.07  | 82.54           |                |                  |                |                  | Y    |         |                 |                |                  |                |                  | 10 |
| 2  | 292.13  | 146.57          | 275.10         | 138.05           |                |                  | Q    | 1159.70 | 580.35          | 1142.67        | 571.84           | 1141.69        | 571.35           | 9  |
| 3  | 492.28  | 246.64          | 475.25         | 238.13           |                |                  | K    | 1031.64 | 516.32          | 1014.61        | 507.81           | 1013.63        | 507.32           | 8  |
| 4  | 579.31  | 290.16          | 562.28         | 281.64           | 561.30         | 281.15           | S    | 831.49  | 416.25          | 814.47         | 407.74           | 813.48         | 407.25           | 7  |
| 5  | 680.36  | 340.68          | 663.33         | 332.17           | 662.34         | 331.68           | T    | 744.46  | 372.73          | 727.43         | 364.22           | 726.45         | 363.73           | 6  |
| 6  | 809.40  | 405.20          | 792.37         | 396.69           | 791.39         | 396.20           | E    | 643.41  | 322.21          | 626.39         | 313.70           | 625.40         | 313.21           | 5  |
| 7  | 922.48  | 461.74          | 905.46         | 453.23           | 904.47         | 452.74           | L    | 514.37  | 257.69          | 497.34         | 249.18           |                |                  | 4  |
| 8  | 1035.57 | 518.29          | 1018.54        | 509.77           | 1017.56        | 509.28           | L    | 401.29  | 201.15          | 384.26         | 192.63           |                |                  | 3  |
| 9  | 1148.65 | 574.83          | 1131.62        | 566.32           | 1130.64        | 565.82           | I    | 288.20  | 144.61          | 271.18         | 136.09           |                |                  | 2  |
| 10 |         |                 |                |                  |                |                  | R    | 175.12  | 88.06           | 158.09         | 79.55            |                |                  | 1  |

GK<sub>D4-cr</sub>GGK<sub>ac</sub>GLGK<sub>ac</sub>GGAK

H4K5

MS/MS Fragmentation of **GKGGKGLGKGGAK**

Found in **IPI00453473**, Tax\_Id=9606 Gene\_Symbol=HIST1H4L;HIST2H4A;HIST1H4

Match to Query 6611: 1269.733064 from(635.873808,2+)

Click mouse within plot area to zoom in by factor of two about that point

Or,   to  Da

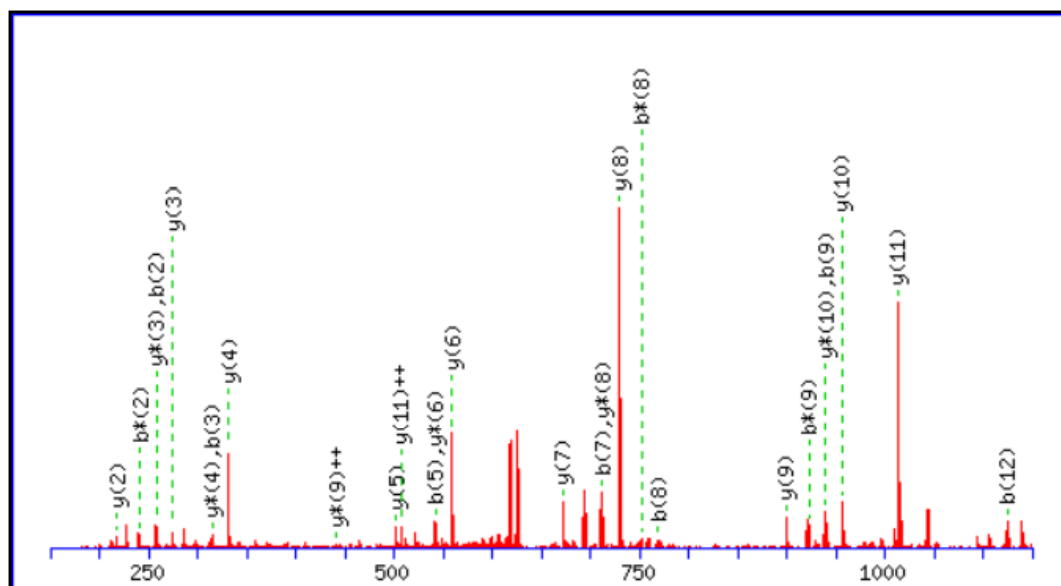

Monoisotopic mass of neutral peptide Mr(calc): 1269.73

Variable modifications:

K2 : Crotonoyl d4 (K)

K5 : Acetyl (K)

K9 : Acetyl (K)

Ions Score: 35 Expect:

| #  | b       | b <sup>++</sup> | b <sup>*</sup> | b <sup>*++</sup> | Seq. | y       | y <sup>++</sup> | y <sup>*</sup> | y <sup>*++</sup> | #  |
|----|---------|-----------------|----------------|------------------|------|---------|-----------------|----------------|------------------|----|
| 1  | 58.03   | 29.52           |                |                  | G    |         |                 |                |                  | 13 |
| 2  | 258.18  | 129.59          | 241.15         | 121.08           | K    | 1213.72 | 607.36          | 1196.69        | 598.85           | 12 |
| 3  | 315.20  | 158.10          | 298.17         | 149.59           | G    | 1013.57 | 507.29          | 996.55         | 498.78           | 11 |
| 4  | 372.22  | 186.61          | 355.19         | 178.10           | G    | 956.55  | 478.78          | 939.53         | 470.27           | 10 |
| 5  | 542.32  | 271.67          | 525.30         | 263.15           | K    | 899.53  | 450.27          | 882.50         | 441.76           | 9  |
| 6  | 599.34  | 300.18          | 582.32         | 291.66           | G    | 729.43  | 365.22          | 712.40         | 356.70           | 8  |
| 7  | 712.43  | 356.72          | 695.40         | 348.20           | L    | 672.40  | 336.71          | 655.38         | 328.19           | 7  |
| 8  | 769.45  | 385.23          | 752.42         | 376.72           | G    | 559.32  | 280.16          | 542.29         | 271.65           | 6  |
| 9  | 939.56  | 470.28          | 922.53         | 461.77           | K    | 502.30  | 251.65          | 485.27         | 243.14           | 5  |
| 10 | 996.58  | 498.79          | 979.55         | 490.28           | G    | 332.19  | 166.60          | 315.17         | 158.09           | 4  |
| 11 | 1053.60 | 527.30          | 1036.57        | 518.79           | G    | 275.17  | 138.09          | 258.14         | 129.58           | 3  |
| 12 | 1124.64 | 562.82          | 1107.61        | 554.31           | A    | 218.15  | 109.58          | 201.12         | 101.07           | 2  |
| 13 |         |                 |                |                  | K    | 147.11  | 74.06           | 130.09         | 65.55            | 1  |

**GGK<sub>D4-cr</sub>GLGK<sub>ac</sub>GGAK<sub>ac</sub>R**

**H4K8**

MS/MS Fragmentation of **GGKGLGKGGAKR**

Found in **IPI00453473**, Tax\_Id=9606 Gene\_Symbol=HIST1H4L;HIST2H4A;HIST1H4

Match to Query 6360: 1240.715124 from(621.364838,2+)

Click mouse within plot area to zoom in by factor of two about that point

Or, Plot from  to  Da

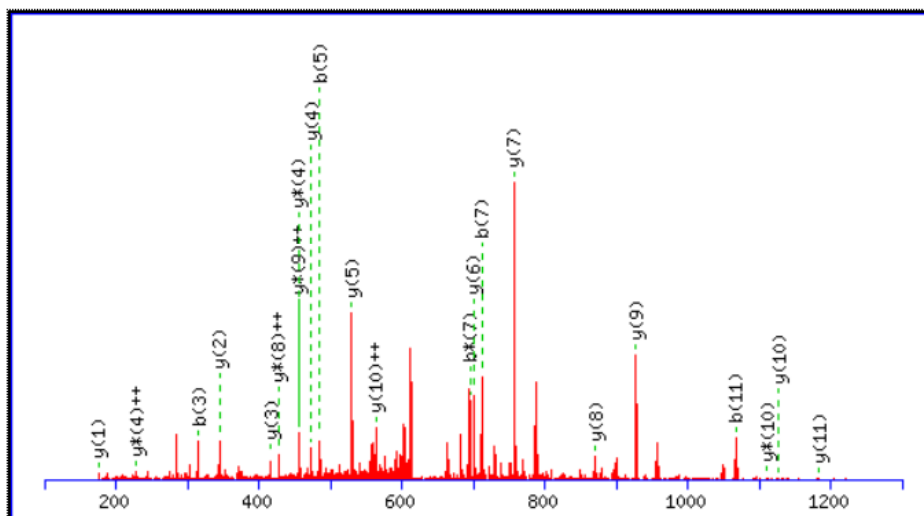

Monoisotopic mass of neutral peptide Mr(calc): 1240.72

Variable modifications:

K3 : Crotonoyl d4 (K)

K7 : Acetyl (K)

K11 : Acetyl (K)

Ions Score: 59 Expect: 0.0096

| #  | b       | b <sup>++</sup> | b <sup>*</sup> | b <sup>*++</sup> | Seq. | y       | y <sup>++</sup> | y <sup>*</sup> | y <sup>*++</sup> | #  |
|----|---------|-----------------|----------------|------------------|------|---------|-----------------|----------------|------------------|----|
| 1  | 58.03   | 29.52           |                |                  | G    |         |                 |                |                  | 12 |
| 2  | 115.05  | 58.03           |                |                  | G    | 1184.70 | 592.86          | 1167.68        | 584.34           | 11 |
| 3  | 315.20  | 158.10          | 298.17         | 149.59           | K    | 1127.68 | 564.35          | 1110.66        | 555.83           | 10 |
| 4  | 372.22  | 186.61          | 355.19         | 178.10           | G    | 927.54  | 464.27          | 910.51         | 455.76           | 9  |
| 5  | 485.30  | 243.15          | 468.28         | 234.64           | L    | 870.52  | 435.76          | 853.49         | 427.25           | 8  |
| 6  | 542.32  | 271.67          | 525.30         | 263.15           | G    | 757.43  | 379.22          | 740.40         | 370.71           | 7  |
| 7  | 712.43  | 356.72          | 695.40         | 348.20           | K    | 700.41  | 350.71          | 683.38         | 342.20           | 6  |
| 8  | 769.45  | 385.23          | 752.42         | 376.72           | G    | 530.30  | 265.66          | 513.28         | 257.14           | 5  |
| 9  | 826.47  | 413.74          | 809.45         | 405.23           | G    | 473.28  | 237.15          | 456.26         | 228.63           | 4  |
| 10 | 897.51  | 449.26          | 880.48         | 440.74           | A    | 416.26  | 208.63          | 399.24         | 200.12           | 3  |
| 11 | 1067.61 | 534.31          | 1050.59        | 525.80           | K    | 345.22  | 173.12          | 328.20         | 164.60           | 2  |
| 12 |         |                 |                |                  | R    | 175.12  | 88.06           | 158.09         | 79.55            | 1  |

# K<sub>D4-cr</sub>ASGPPVSELITK H1.2 K33

MS/MS Fragmentation of **KASGPPVSELITK**

Found in **IPI00217465**, Tax\_Id=9606 Gene\_Symbol=HIST1H1C Histone H1.2

Match to Query 7492: 1397.808384 from(699.911468,2+)

Click mouse within plot area to zoom in by factor of two about that point

Or,   to  Da

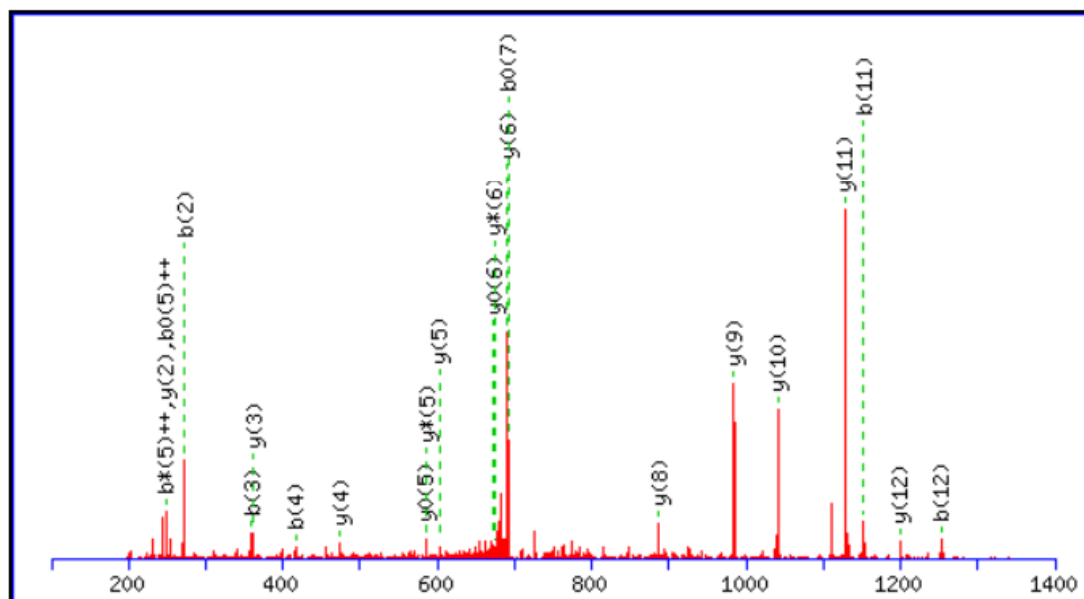

Monoisotopic mass of neutral peptide Mr(calc): 1397.81

Variable modifications:

K1 : Crotonoyl d4 (K)

Ions Score: 70 Expect: 0.00086

| #  | b       | b <sup>++</sup> | b*      | b <sup>*++</sup> | b <sup>0</sup> | b <sup>0++</sup> | Seq. | y       | y <sup>++</sup> | y*      | y <sup>*++</sup> | y <sup>0</sup> | y <sup>0++</sup> | #  |
|----|---------|-----------------|---------|------------------|----------------|------------------|------|---------|-----------------|---------|------------------|----------------|------------------|----|
| 1  | 201.15  | 101.08          | 184.13  | 92.57            |                |                  | K    |         |                 |         |                  |                |                  | 13 |
| 2  | 272.19  | 136.60          | 255.16  | 128.09           |                |                  | A    | 1198.67 | 599.84          | 1181.64 | 591.32           | 1180.66        | 590.83           | 12 |
| 3  | 359.22  | 180.11          | 342.20  | 171.60           | 341.21         | 171.11           | S    | 1127.63 | 564.32          | 1110.60 | 555.81           | 1109.62        | 555.31           | 11 |
| 4  | 416.24  | 208.63          | 399.22  | 200.11           | 398.23         | 199.62           | G    | 1040.60 | 520.80          | 1023.57 | 512.29           | 1022.59        | 511.80           | 10 |
| 5  | 513.30  | 257.15          | 496.27  | 248.64           | 495.29         | 248.15           | P    | 983.58  | 492.29          | 966.55  | 483.78           | 965.57         | 483.29           | 9  |
| 6  | 610.35  | 305.68          | 593.32  | 297.17           | 592.34         | 296.67           | P    | 886.52  | 443.77          | 869.50  | 435.25           | 868.51         | 434.76           | 8  |
| 7  | 709.42  | 355.21          | 692.39  | 346.70           | 691.41         | 346.21           | V    | 789.47  | 395.24          | 772.45  | 386.73           | 771.46         | 386.23           | 7  |
| 8  | 796.45  | 398.73          | 779.42  | 390.22           | 778.44         | 389.72           | S    | 690.40  | 345.71          | 673.38  | 337.19           | 672.39         | 336.70           | 6  |
| 9  | 925.49  | 463.25          | 908.47  | 454.74           | 907.48         | 454.24           | E    | 603.37  | 302.19          | 586.34  | 293.68           | 585.36         | 293.18           | 5  |
| 10 | 1038.58 | 519.79          | 1021.55 | 511.28           | 1020.57        | 510.79           | L    | 474.33  | 237.67          | 457.30  | 229.15           | 456.32         | 228.66           | 4  |
| 11 | 1151.66 | 576.33          | 1134.63 | 567.82           | 1133.65        | 567.33           | I    | 361.24  | 181.13          | 344.22  | 172.61           | 343.23         | 172.12           | 3  |
| 12 | 1252.71 | 626.86          | 1235.68 | 618.34           | 1234.70        | 617.85           | T    | 248.16  | 124.58          | 231.13  | 116.07           | 230.15         | 115.58           | 2  |
| 13 |         |                 |         |                  |                |                  | K    | 147.11  | 74.06           | 130.09  | 65.55            |                |                  | 1  |

**K<sub>D4-cr</sub>ALAAAGYDVEK**

**H1.2K63**

MS/MS Fragmentation of **KALAAAGYDVEK**

Found in **IPI00217465**, Tax\_Id=9606 Gene\_Symbol=HIST1H1C Histone H1.2

Match to Query 13666: 1306.705114 from(654.359833,2+)

Click mouse within plot area to zoom in by factor of two about that point

Or,   to  Da

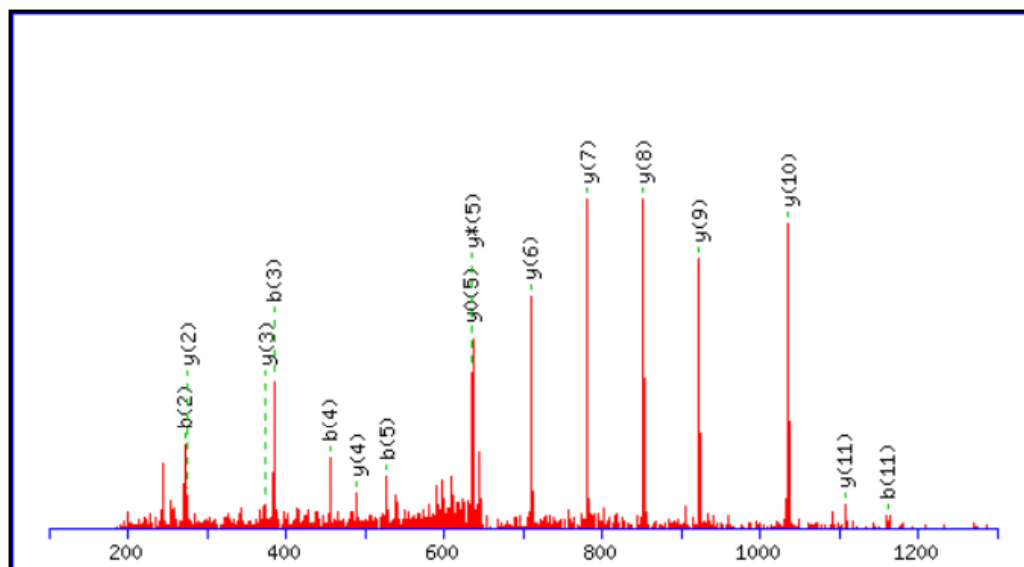

Monoisotopic mass of neutral peptide Mr(calc): 1306.71

Variable modifications:

K1 : Crotonoyl d4 (K)

Ions Score: 46 Expect: 0.24

| #  | b       | b <sup>++</sup> | b*      | b* <sup>++</sup> | b <sup>0</sup> | b <sup>0++</sup> | Seq. | y       | y <sup>++</sup> | y*      | y* <sup>++</sup> | y <sup>0</sup> | y <sup>0++</sup> | #  |
|----|---------|-----------------|---------|------------------|----------------|------------------|------|---------|-----------------|---------|------------------|----------------|------------------|----|
| 1  | 201.15  | 101.08          | 184.13  | 92.57            |                |                  | K    |         |                 |         |                  |                |                  | 12 |
| 2  | 272.19  | 136.60          | 255.16  | 128.09           |                |                  | A    | 1107.57 | 554.29          | 1090.54 | 545.77           | 1089.56        | 545.28           | 11 |
| 3  | 385.27  | 193.14          | 368.25  | 184.63           |                |                  | L    | 1036.53 | 518.77          | 1019.50 | 510.26           | 1018.52        | 509.76           | 10 |
| 4  | 456.31  | 228.66          | 439.29  | 220.15           |                |                  | A    | 923.45  | 462.23          | 906.42  | 453.71           | 905.44         | 453.22           | 9  |
| 5  | 527.35  | 264.18          | 510.32  | 255.66           |                |                  | A    | 852.41  | 426.71          | 835.38  | 418.20           | 834.40         | 417.70           | 8  |
| 6  | 598.39  | 299.70          | 581.36  | 291.18           |                |                  | A    | 781.37  | 391.19          | 764.35  | 382.68           | 763.36         | 382.18           | 7  |
| 7  | 655.41  | 328.21          | 638.38  | 319.69           |                |                  | G    | 710.34  | 355.67          | 693.31  | 347.16           | 692.32         | 346.67           | 6  |
| 8  | 818.47  | 409.74          | 801.44  | 401.23           |                |                  | Y    | 653.31  | 327.16          | 636.29  | 318.65           | 635.30         | 318.16           | 5  |
| 9  | 933.50  | 467.25          | 916.47  | 458.74           | 915.49         | 458.25           | D    | 490.25  | 245.63          | 473.22  | 237.12           | 472.24         | 236.62           | 4  |
| 10 | 1032.57 | 516.79          | 1015.54 | 508.27           | 1014.56        | 507.78           | V    | 375.22  | 188.12          | 358.20  | 179.60           | 357.21         | 179.11           | 3  |
| 11 | 1161.61 | 581.31          | 1144.58 | 572.79           | 1143.60        | 572.30           | E    | 276.16  | 138.58          | 259.13  | 130.07           | 258.14         | 129.58           | 2  |
| 12 |         |                 |         |                  |                |                  | K    | 147.11  | 74.06           | 130.09  | 65.55            |                |                  | 1  |

# SLVSK<sub>D4-cr</sub>GTLVQTK H1.2K89

MS/MS Fragmentation of **SLVSKGTLVQTK**

Found in **IPI00217465**, Tax\_Id=9606 Gene\_Symbol=HIST1H1C Histone H1.2

Match to Query 7174: 1331.795934 from(666.905243,2+)

Click mouse within plot area to zoom in by factor of two about that point

Or, Plot from  to  Da

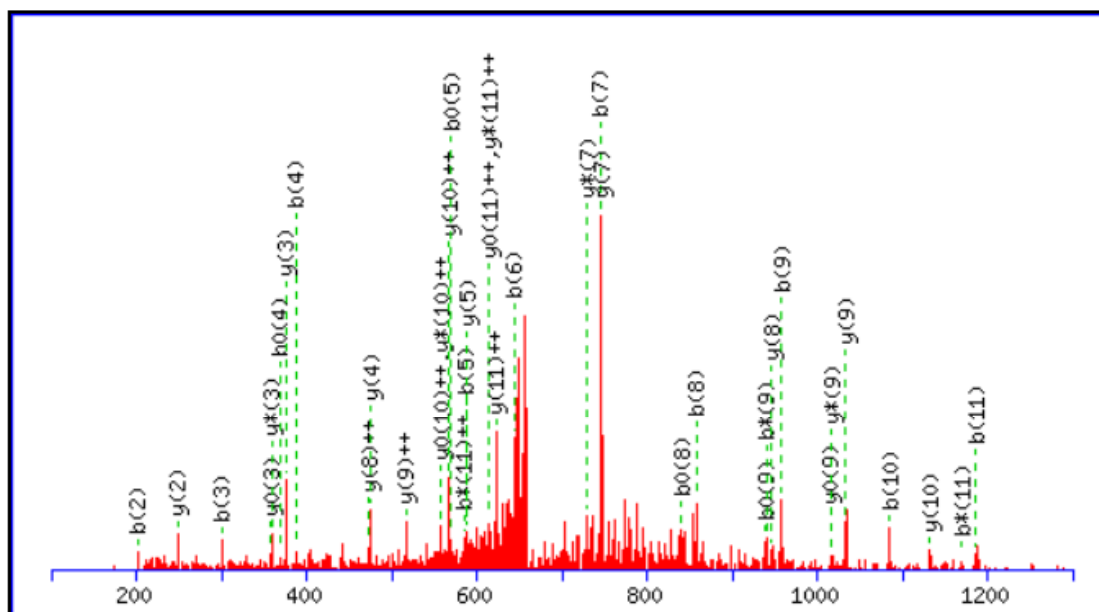

Monoisotopic mass of neutral peptide Mr(calc) : 1331.80

Variable modifications:

K5 : Crotonoyl d4 (K)

Ions Score: 34 Expect: 3.5

| #  | b       | b <sup>++</sup> | b <sup>*</sup> | b <sup>*++</sup> | b <sup>0</sup> | b <sup>0++</sup> | Seq. | y       | y <sup>++</sup> | y <sup>*</sup> | y <sup>*++</sup> | y <sup>0</sup> | y <sup>0++</sup> | #  |
|----|---------|-----------------|----------------|------------------|----------------|------------------|------|---------|-----------------|----------------|------------------|----------------|------------------|----|
| 1  | 88.04   | 44.52           |                |                  | 70.03          | 35.52            | S    |         |                 |                |                  |                |                  | 12 |
| 2  | 201.12  | 101.07          |                |                  | 183.11         | 92.06            | L    | 1245.77 | 623.39          | 1228.74        | 614.88           | 1227.76        | 614.38           | 11 |
| 3  | 300.19  | 150.60          |                |                  | 282.18         | 141.59           | V    | 1132.69 | 566.85          | 1115.66        | 558.33           | 1114.68        | 557.84           | 10 |
| 4  | 387.22  | 194.12          |                |                  | 369.21         | 185.11           | S    | 1033.62 | 517.31          | 1016.59        | 508.80           | 1015.61        | 508.31           | 9  |
| 5  | 587.37  | 294.19          | 570.34         | 285.68           | 569.36         | 285.18           | K    | 946.59  | 473.80          | 929.56         | 465.28           | 928.58         | 464.79           | 8  |
| 6  | 644.39  | 322.70          | 627.37         | 314.19           | 626.38         | 313.69           | G    | 746.44  | 373.72          | 729.41         | 365.21           | 728.43         | 364.72           | 7  |
| 7  | 745.44  | 373.22          | 728.41         | 364.71           | 727.43         | 364.22           | T    | 689.42  | 345.21          | 672.39         | 336.70           | 671.41         | 336.21           | 6  |
| 8  | 858.52  | 429.77          | 841.50         | 421.25           | 840.51         | 420.76           | L    | 588.37  | 294.69          | 571.34         | 286.18           | 570.36         | 285.68           | 5  |
| 9  | 957.59  | 479.30          | 940.57         | 470.79           | 939.58         | 470.29           | V    | 475.29  | 238.15          | 458.26         | 229.63           | 457.28         | 229.14           | 4  |
| 10 | 1085.65 | 543.33          | 1068.62        | 534.82           | 1067.64        | 534.32           | Q    | 376.22  | 188.61          | 359.19         | 180.10           | 358.21         | 179.61           | 3  |
| 11 | 1186.70 | 593.85          | 1169.67        | 585.34           | 1168.69        | 584.85           | T    | 248.16  | 124.58          | 231.13         | 116.07           | 230.15         | 115.58           | 2  |
| 12 |         |                 |                |                  |                |                  | K    | 147.11  | 74.06           | 130.09         | 65.55            |                |                  | 1  |

# GTLVQTK<sub>D4-cr</sub>GTGASGSFK H1.2K96

MS/MS Fragmentation of **GTLVQTKGTGASGSFK**

Found in **IPI00217467**, Tax\_Id=9606 Gene\_Symbol=HIST1H1E Histone H1.4

Match to Query 8770: 1609.861244 from(805.937898,2+)

Click mouse within plot area to zoom in by factor of two about that point

Or,   to  Da

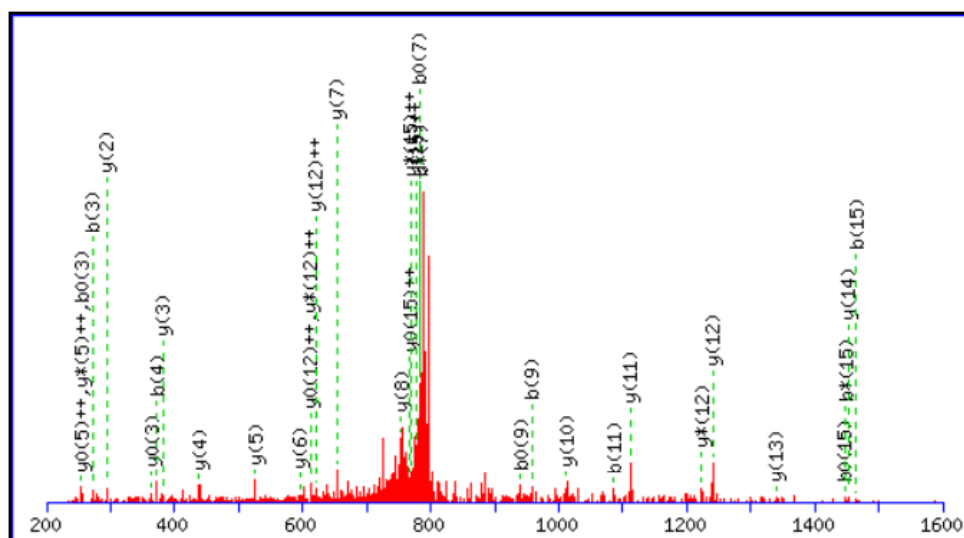

Monoisotopic mass of neutral peptide Mr(calc): 1609.86

Variable modifications:

K7 : Crotonoyl d4 (K)

Ions Score: 39 Expect: 1.3

| #  | b       | b <sup>++</sup> | b <sup>*</sup> | b <sup>*++</sup> | b <sup>0</sup> | b <sup>0++</sup> | Seq. | y       | y <sup>++</sup> | y <sup>*</sup> | y <sup>*++</sup> | y <sup>0</sup> | y <sup>0++</sup> | #  |
|----|---------|-----------------|----------------|------------------|----------------|------------------|------|---------|-----------------|----------------|------------------|----------------|------------------|----|
| 1  | 58.03   | 29.52           |                |                  |                |                  | G    |         |                 |                |                  |                |                  | 16 |
| 2  | 159.08  | 80.04           |                |                  | 141.07         | 71.04            | T    | 1553.85 | 777.43          | 1536.82        | 768.91           | 1535.84        | 768.42           | 15 |
| 3  | 272.16  | 136.58          |                |                  | 254.15         | 127.58           | L    | 1452.80 | 726.90          | 1435.77        | 718.39           | 1434.79        | 717.90           | 14 |
| 4  | 371.23  | 186.12          |                |                  | 353.22         | 177.11           | V    | 1339.72 | 670.36          | 1322.69        | 661.85           | 1321.70        | 661.36           | 13 |
| 5  | 499.29  | 250.15          | 482.26         | 241.63           | 481.28         | 241.14           | Q    | 1240.65 | 620.83          | 1223.62        | 612.31           | 1222.64        | 611.82           | 12 |
| 6  | 600.34  | 300.67          | 583.31         | 292.16           | 582.32         | 291.67           | T    | 1112.59 | 556.80          | 1095.56        | 548.28           | 1094.58        | 547.79           | 11 |
| 7  | 800.48  | 400.74          | 783.45         | 392.23           | 782.47         | 391.74           | K    | 1011.54 | 506.27          | 994.51         | 497.76           | 993.53         | 497.27           | 10 |
| 8  | 857.50  | 429.26          | 840.48         | 420.74           | 839.49         | 420.25           | G    | 811.39  | 406.20          | 794.37         | 397.69           | 793.38         | 397.20           | 9  |
| 9  | 958.55  | 479.78          | 941.52         | 471.27           | 940.54         | 470.77           | T    | 754.37  | 377.69          | 737.35         | 369.18           | 736.36         | 368.68           | 8  |
| 10 | 1015.57 | 508.29          | 998.55         | 499.78           | 997.56         | 499.28           | G    | 653.33  | 327.17          | 636.30         | 318.65           | 635.31         | 318.16           | 7  |
| 11 | 1086.61 | 543.81          | 1069.58        | 535.29           | 1068.60        | 534.80           | A    | 596.30  | 298.66          | 579.28         | 290.14           | 578.29         | 289.65           | 6  |
| 12 | 1173.64 | 587.32          | 1156.61        | 578.81           | 1155.63        | 578.32           | S    | 525.27  | 263.14          | 508.24         | 254.62           | 507.26         | 254.13           | 5  |
| 13 | 1230.66 | 615.83          | 1213.64        | 607.32           | 1212.65        | 606.83           | G    | 438.23  | 219.62          | 421.21         | 211.11           | 420.22         | 210.62           | 4  |
| 14 | 1317.69 | 659.35          | 1300.67        | 650.84           | 1299.68        | 650.35           | S    | 381.21  | 191.11          | 364.19         | 182.60           | 363.20         | 182.10           | 3  |
| 15 | 1464.76 | 732.89          | 1447.74        | 724.37           | 1446.75        | 723.88           | F    | 294.18  | 147.59          | 277.15         | 139.08           |                |                  | 2  |
| 16 |         |                 |                |                  |                |                  | K    | 147.11  | 74.06           | 130.09         | 65.55            |                |                  | 1  |

KPAAATVTK<sub>D4-cr</sub>K

H1.2K167

MS/MS Fragmentation of KPAAATVTKK

Found in **IP100217465**, Tax\_Id=9606 Gene\_Symbol=HIST1H1C Histone H1.2

Match to Query 4350: 1085.674594 from(543.844573,2+)

Click mouse within plot area to zoom in by factor of two about that point

Or,   to  Da

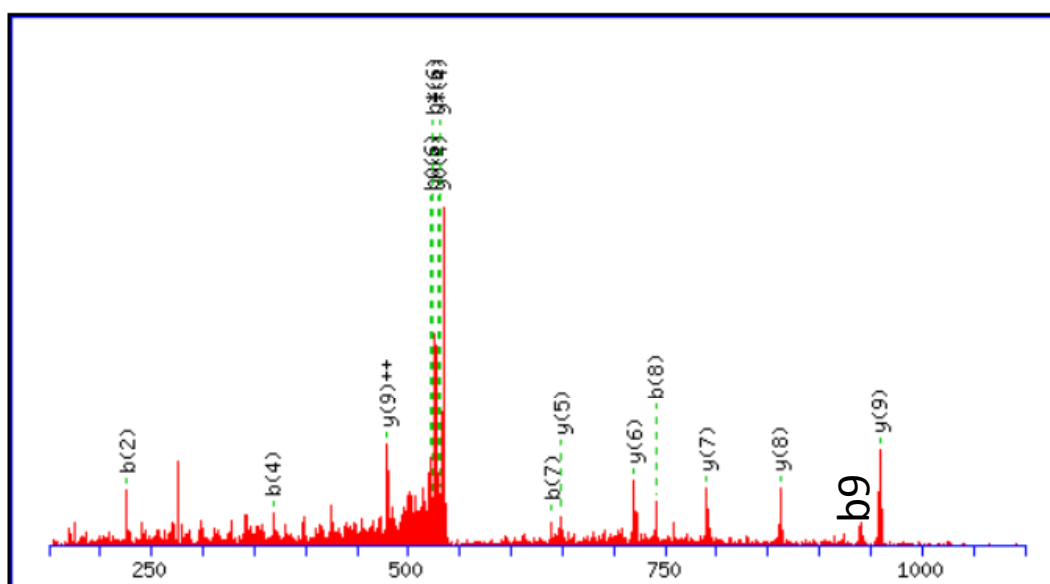

Monoisotopic mass of neutral peptide Mr(calc): 1085.67

Variable modifications:

K9 : Crotonoyl d4 (K)

Score: 34 Expect: 3.6

| #  | b      | b <sup>++</sup> | b*     | b* <sup>++</sup> | b <sup>0</sup> | b <sup>0++</sup> | Seq. | y      | y <sup>++</sup> | y*     | y* <sup>++</sup> | y <sup>0</sup> | y <sup>0++</sup> | #  |
|----|--------|-----------------|--------|------------------|----------------|------------------|------|--------|-----------------|--------|------------------|----------------|------------------|----|
| 1  | 129.10 | 65.05           | 112.08 | 56.54            |                |                  | K    |        |                 |        |                  |                |                  | 10 |
| 2  | 226.15 | 113.58          | 209.13 | 105.07           |                |                  | P    | 958.59 | 479.80          | 941.56 | 471.28           | 940.58         | 470.79           | 9  |
| 3  | 297.19 | 149.10          | 280.17 | 140.59           |                |                  | A    | 861.53 | 431.27          | 844.51 | 422.76           | 843.52         | 422.27           | 8  |
| 4  | 368.23 | 184.62          | 351.20 | 176.10           |                |                  | A    | 790.50 | 395.75          | 773.47 | 387.24           | 772.49         | 386.75           | 7  |
| 5  | 439.27 | 220.14          | 422.24 | 211.62           |                |                  | A    | 719.46 | 360.23          | 702.43 | 351.72           | 701.45         | 351.23           | 6  |
| 6  | 540.31 | 270.66          | 523.29 | 262.15           | 522.30         | 261.66           | T    | 648.42 | 324.72          | 631.40 | 316.20           | 630.41         | 315.71           | 5  |
| 7  | 639.38 | 320.19          | 622.36 | 311.68           | 621.37         | 311.19           | V    | 547.38 | 274.19          | 530.35 | 265.68           | 529.36         | 265.19           | 4  |
| 8  | 940.5  | 70.72           | 723.40 | 362.21           | 722.42         | 361.71           | T    | 448.31 | 224.66          | 431.28 | 216.14           | 430.30         | 215.65           | 3  |
| 9  | 666.55 | 334.77          | 851.50 | 426.25           | 850.51         | 425.76           | K    | 347.26 | 174.13          | 330.23 | 165.62           |                |                  | 2  |
| 10 |        |                 |        |                  |                |                  | K    | 219.16 | 110.09          | 202.14 | 101.57           |                |                  | 1  |

K<sub>cr</sub>GNYAER

H2AK36

MS/MS Fragmentation of **KGNYSER**  
Found in **gi|84028211**, Histone H2A type 1 [Mus musculus]  
Match to Query 6670: 920.434244 from(461.224398,2+)

Click mouse within plot area to zoom in by factor of two about that point  
Or,   to  Da

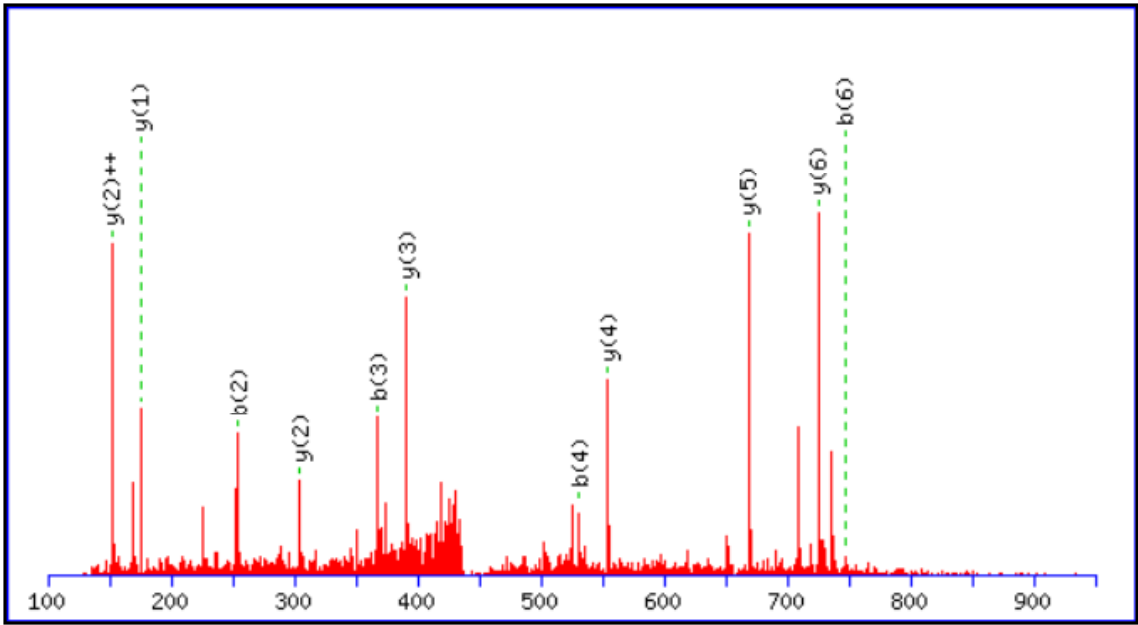

Monoisotopic mass of neutral peptide  $M_r(\text{calc})$ : 920.44  
Variable modifications:  
K1 : Crotonoyl (K)  
Ions Score: 42 Expect: 0.0035

| # | b      | b <sup>++</sup> | b <sup>*</sup> | b <sup>*++</sup> | b <sup>0</sup> | b <sup>0++</sup> | Seq. | y      | y <sup>++</sup> | y <sup>*</sup> | y <sup>*++</sup> | y <sup>0</sup> | y <sup>0++</sup> | # |
|---|--------|-----------------|----------------|------------------|----------------|------------------|------|--------|-----------------|----------------|------------------|----------------|------------------|---|
| 1 | 197.13 | 99.07           | 180.10         | 90.55            |                |                  | K    |        |                 |                |                  |                |                  | 7 |
| 2 | 254.15 | 127.58          | 237.12         | 119.07           |                |                  | G    | 725.32 | 363.16          | 708.29         | 354.65           | 707.31         | 354.16           | 6 |
| 3 | 368.19 | 184.60          | 351.17         | 176.09           |                |                  | N    | 668.30 | 334.65          | 651.27         | 326.14           | 650.29         | 325.65           | 5 |
| 4 | 531.26 | 266.13          | 514.23         | 257.62           |                |                  | Y    | 554.26 | 277.63          | 537.23         | 269.12           | 536.25         | 268.63           | 4 |
| 5 | 618.29 | 309.65          | 601.26         | 301.13           | 600.28         | 300.64           | S    | 391.19 | 196.10          | 374.17         | 187.59           | 373.18         | 187.10           | 3 |
| 6 | 747.33 | 374.17          | 730.30         | 365.66           | 729.32         | 365.16           | E    | 304.16 | 152.58          | 287.13         | 144.07           | 286.15         | 143.58           | 2 |
| 7 |        |                 |                |                  |                |                  | R    | 175.12 | 88.06           | 158.09         | 79.55            |                |                  | 1 |

VTIAQGGVLPNIQAVLLPK<sub>cr</sub>K

H2AK118

MS/MS Fragmentation of **VTIAQGGVLPNIQAVLLPKK**Found in **IPI00229542**, Tax\_Id=10090 Gene\_Symbol=Hist1h2aa Histone H2A

Match to Query 12200: 2126.282553 from(709.768127,3+)

Click mouse within plot area to zoom in by factor of two about that point

Or,  200  1900 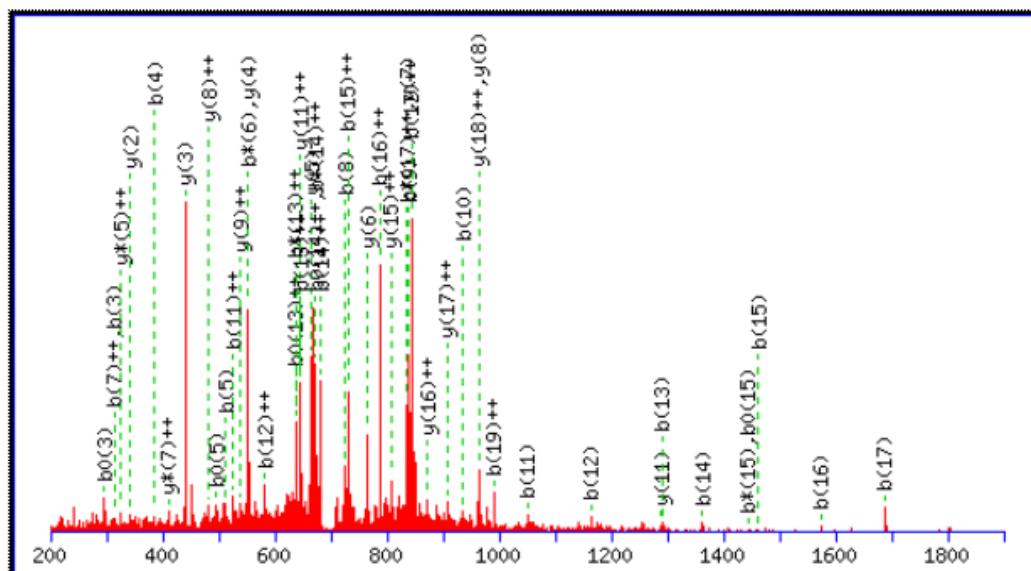

Monoisotopic mass of neutral peptide Mr(calc): 2126.28

Variable modifications:

K19 : Crotonoyl (K)

Ions Score: 40 Expect: 4.4

| #  | b       | b <sup>++</sup> | b <sup>*</sup> | b <sup>++</sup> | b <sup>0</sup> | b <sup>0++</sup> | Seq. | y       | y <sup>++</sup> | y <sup>*</sup> | y <sup>++</sup> | y <sup>0</sup> | y <sup>0++</sup> | #  |
|----|---------|-----------------|----------------|-----------------|----------------|------------------|------|---------|-----------------|----------------|-----------------|----------------|------------------|----|
| 1  | 100.08  | 50.54           |                |                 |                |                  | V    |         |                 |                |                 |                |                  | 20 |
| 2  | 201.12  | 101.07          |                |                 | 183.11         | 92.06            | T    | 2028.22 | 1014.61         | 2011.19        | 1006.10         | 2010.21        | 1005.61          | 19 |
| 3  | 314.21  | 157.61          |                |                 | 296.20         | 148.60           | I    | 1927.17 | 964.09          | 1910.15        | 955.58          |                |                  | 18 |
| 4  | 385.24  | 193.13          |                |                 | 367.23         | 184.12           | A    | 1814.09 | 907.55          | 1797.06        | 899.04          |                |                  | 17 |
| 5  | 513.30  | 257.16          | 496.28         | 248.64          | 495.29         | 248.15           | Q    | 1743.05 | 872.03          | 1726.03        | 863.52          |                |                  | 16 |
| 6  | 570.32  | 285.67          | 553.30         | 277.15          | 552.31         | 276.66           | G    | 1614.99 | 808.00          | 1597.97        | 799.49          |                |                  | 15 |
| 7  | 627.35  | 314.18          | 610.32         | 305.66          | 609.34         | 305.17           | G    | 1557.97 | 779.49          | 1540.95        | 770.98          |                |                  | 14 |
| 8  | 726.41  | 363.71          | 709.39         | 355.20          | 708.40         | 354.71           | V    | 1500.95 | 750.98          | 1483.92        | 742.47          |                |                  | 13 |
| 9  | 839.50  | 420.25          | 822.47         | 411.74          | 821.49         | 411.25           | L    | 1401.88 | 701.45          | 1384.86        | 692.93          |                |                  | 12 |
| 10 | 936.55  | 468.78          | 919.52         | 460.27          | 918.54         | 459.77           | P    | 1288.80 | 644.90          | 1271.77        | 636.39          |                |                  | 11 |
| 11 | 1050.59 | 525.80          | 1033.57        | 517.29          | 1032.58        | 516.80           | N    | 1191.75 | 596.38          | 1174.72        | 587.86          |                |                  | 10 |
| 12 | 1163.68 | 582.34          | 1146.65        | 573.83          | 1145.67        | 573.34           | I    | 1077.70 | 539.36          | 1060.68        | 530.84          |                |                  | 9  |
| 13 | 1291.74 | 646.37          | 1274.71        | 637.86          | 1273.73        | 637.37           | O    | 964.62  | 482.81          | 947.59         | 474.30          |                |                  | 8  |
| 14 | 1362.77 | 681.89          | 1345.75        | 673.38          | 1344.76        | 672.89           | A    | 836.56  | 418.78          | 819.53         | 410.27          |                |                  | 7  |
| 15 | 1461.84 | 731.42          | 1444.82        | 722.91          | 1443.83        | 722.42           | V    | 765.52  | 383.27          | 748.50         | 374.75          |                |                  | 6  |
| 16 | 1574.93 | 787.97          | 1557.90        | 779.45          | 1556.92        | 778.96           | L    | 666.45  | 333.73          | 649.43         | 325.22          |                |                  | 5  |
| 17 | 1688.01 | 844.51          | 1670.98        | 836.00          | 1670.00        | 835.50           | L    | 553.37  | 277.19          | 536.34         | 268.68          |                |                  | 4  |
| 18 | 1785.06 | 893.04          | 1768.04        | 884.52          | 1767.05        | 884.03           | P    | 440.29  | 220.65          | 423.26         | 212.13          |                |                  | 3  |
| 19 | 1981.18 | 991.10          | 1964.16        | 982.58          | 1963.17        | 982.09           | K    | 343.23  | 172.12          | 326.21         | 163.61          |                |                  | 2  |
| 20 |         |                 |                |                 |                |                  | K    | 147.11  | 74.06           | 130.09         | 65.55           |                |                  | 1  |

# PEPAK<sub>cr</sub>SAPAPK

# H2BK5

MS/MS Fragmentation of **PEPAKSAPAPK**

Found in **IP100114642**, Tax\_Id=10090 Gene\_Symbol=Hist1h2bf,LOC100046213;Hist1

Match to Query 14126: 1159.622834 from(580.818693,2+)

Click mouse within plot area to zoom in by factor of two about that point

Or,   to  Da

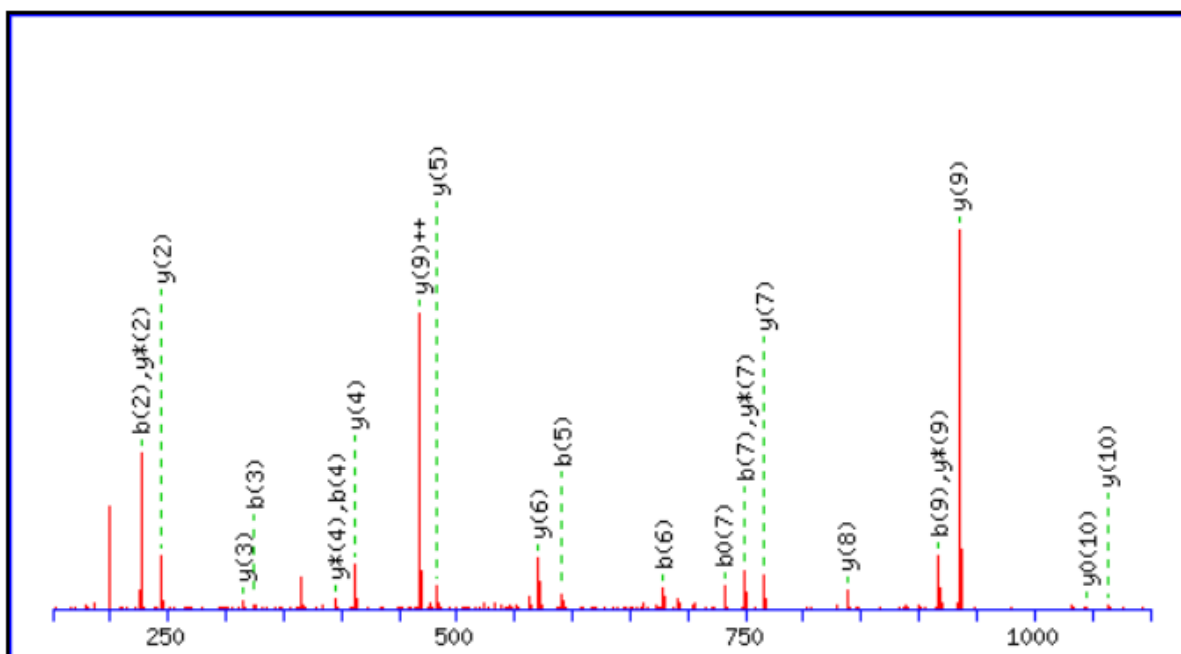

Monoisotopic mass of neutral peptide Mr(calc): 1159.62

Variable modifications:

K5 : Crotonoyl (K)

Ions Score: 70 Expect: 0.00021

| #  | b       | b <sup>++</sup> | b*     | b* <sup>++</sup> | b <sup>0</sup> | b <sup>0++</sup> | Seq. | y       | y <sup>++</sup> | y*      | y* <sup>++</sup> | y <sup>0</sup> | y <sup>0++</sup> | #  |
|----|---------|-----------------|--------|------------------|----------------|------------------|------|---------|-----------------|---------|------------------|----------------|------------------|----|
| 1  | 98.06   | 49.53           |        |                  |                |                  | P    |         |                 |         |                  |                |                  | 11 |
| 2  | 227.10  | 114.05          |        |                  | 209.09         | 105.05           | E    | 1063.58 | 532.29          | 1046.55 | 523.78           | 1045.57        | 523.29           | 10 |
| 3  | 324.16  | 162.58          |        |                  | 306.14         | 153.58           | P    | 934.54  | 467.77          | 917.51  | 459.26           | 916.53         | 458.77           | 9  |
| 4  | 395.19  | 198.10          |        |                  | 377.18         | 189.09           | A    | 837.48  | 419.25          | 820.46  | 410.73           | 819.47         | 410.24           | 8  |
| 5  | 591.31  | 296.16          | 574.29 | 287.65           | 573.30         | 287.16           | K    | 766.45  | 383.73          | 749.42  | 375.21           | 748.44         | 374.72           | 7  |
| 6  | 678.35  | 339.68          | 661.32 | 331.16           | 660.34         | 330.67           | S    | 570.32  | 285.67          | 553.30  | 277.15           | 552.31         | 276.66           | 6  |
| 7  | 749.38  | 375.20          | 732.36 | 366.68           | 731.37         | 366.19           | A    | 483.29  | 242.15          | 466.27  | 233.64           |                |                  | 5  |
| 8  | 846.44  | 423.72          | 829.41 | 415.21           | 828.43         | 414.72           | P    | 412.26  | 206.63          | 395.23  | 198.12           |                |                  | 4  |
| 9  | 917.47  | 459.24          | 900.45 | 450.73           | 899.46         | 450.23           | A    | 315.20  | 158.10          | 298.18  | 149.59           |                |                  | 3  |
| 10 | 1014.53 | 507.77          | 997.50 | 499.25           | 996.51         | 498.76           | P    | 244.17  | 122.59          | 227.14  | 114.07           |                |                  | 2  |
| 11 |         |                 |        |                  |                |                  | K    | 147.11  | 74.06           | 130.09  | 65.55            |                |                  | 1  |

PEPAK<sub>ac</sub>SAPAPK<sub>cr</sub>K

H2BK11

MS/MS Fragmentation of **PEPAKSAPAPKK**Found in **IPI00114642**, Tax\_Id=10090 Gene\_Symbol=Hist1h2bf;LOC100046213;Hist1

Match to Query 18885: 1329.698154 from(665.856353,2+)

Click mouse within plot area to zoom in by factor of two about that point

Or,   to  Da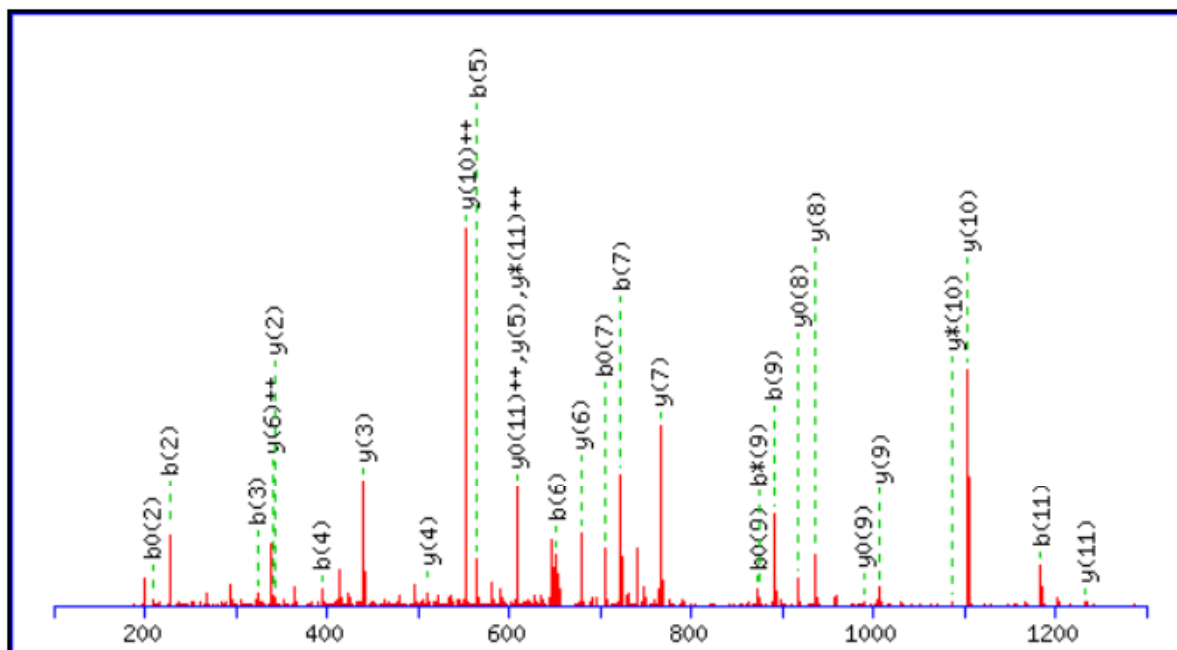

Monoisotopic mass of neutral peptide Mr(calc): 1329.73

Variable modifications:

K5 : Acetyl (K)

K11 : Crotonoyl (K)

Ions Score: 54 Expect: 0.0091

| #  | b       | b <sup>++</sup> | b <sup>*</sup> | b <sup>*++</sup> | b <sup>0</sup> | b <sup>0++</sup> | Seq. | y       | y <sup>++</sup> | y <sup>*</sup> | y <sup>*++</sup> | y <sup>0</sup> | y <sup>0++</sup> | #  |
|----|---------|-----------------|----------------|------------------|----------------|------------------|------|---------|-----------------|----------------|------------------|----------------|------------------|----|
| 1  | 98.06   | 49.53           |                |                  |                |                  | P    |         |                 |                |                  |                |                  | 12 |
| 2  | 227.10  | 114.05          |                |                  | 209.09         | 105.05           | E    | 1233.68 | 617.35          | 1216.66        | 608.83           | 1215.67        | 608.34           | 11 |
| 3  | 324.16  | 162.58          |                |                  | 306.14         | 153.58           | P    | 1104.64 | 552.82          | 1087.61        | 544.31           | 1086.63        | 543.82           | 10 |
| 4  | 395.19  | 198.10          |                |                  | 377.18         | 189.09           | A    | 1007.59 | 504.30          | 990.56         | 495.78           | 989.58         | 495.29           | 9  |
| 5  | 565.30  | 283.15          | 548.27         | 274.64           | 547.29         | 274.15           | K    | 936.55  | 468.78          | 919.52         | 460.27           | 918.54         | 459.77           | 8  |
| 6  | 652.33  | 326.67          | 635.30         | 318.16           | 634.32         | 317.66           | S    | 766.45  | 383.73          | 749.42         | 375.21           | 748.44         | 374.72           | 7  |
| 7  | 723.37  | 362.19          | 706.34         | 353.67           | 705.36         | 353.18           | A    | 679.41  | 340.21          | 662.39         | 331.70           |                |                  | 6  |
| 8  | 820.42  | 410.71          | 803.39         | 402.20           | 802.41         | 401.71           | P    | 608.38  | 304.69          | 591.35         | 296.18           |                |                  | 5  |
| 9  | 891.46  | 446.23          | 874.43         | 437.72           | 873.45         | 437.23           | A    | 511.32  | 256.17          | 494.30         | 247.65           |                |                  | 4  |
| 10 | 988.51  | 494.76          | 971.48         | 486.25           | 970.50         | 485.75           | P    | 440.29  | 220.65          | 423.26         | 212.13           |                |                  | 3  |
| 11 | 1184.63 | 592.82          | 1167.60        | 584.31           | 1166.62        | 583.81           | K    | 343.23  | 172.12          | 326.21         | 163.61           |                |                  | 2  |
| 12 |         |                 |                |                  |                |                  | K    | 147.11  | 74.06           | 130.09         | 65.55            |                |                  | 1  |

**K<sub>cr</sub>GSK<sub>ac</sub>K<sub>ac</sub>AVTK**

**H2BK12**

MS/MS Fragmentation of **KGSKKAVTK**

Found in **IP100114642**, Tax\_Id=10090 Gene\_Symbol=Hist1h2bf;LOC100046213;Hist1

Match to Ouerv 12186: 1097.644204 from(549.829378.2+)

Click mouse within plot area to zoom in by factor of two about that point

Or,   to  Da

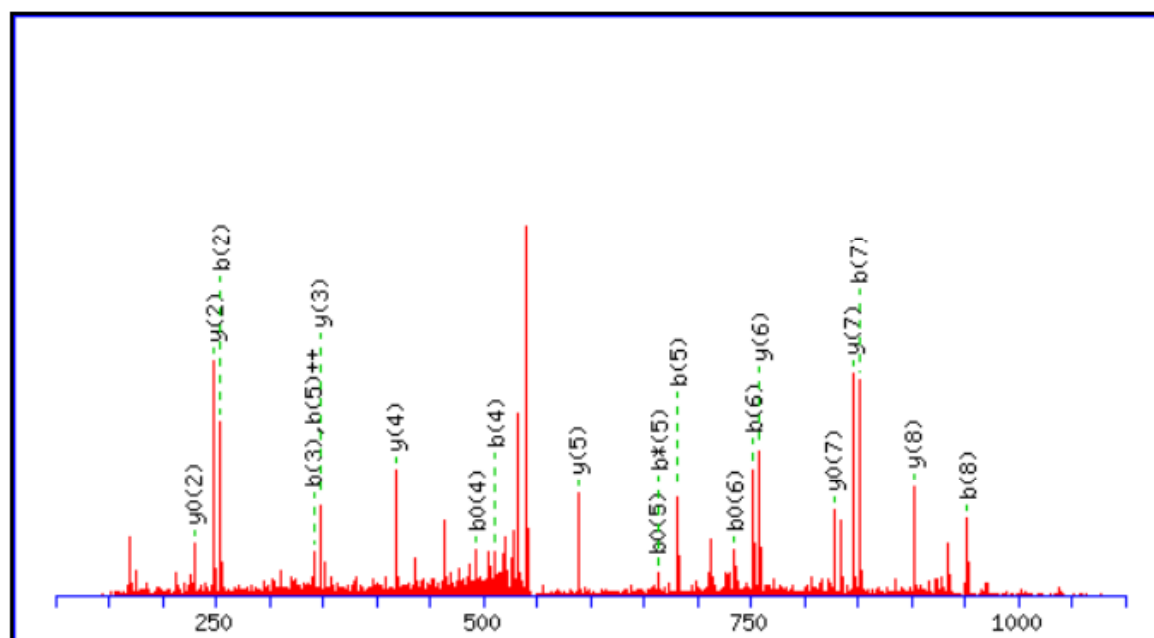

Monoisotopic mass of neutral peptide Mr(calc): 1097.64

Variable modifications:

K1 : Crotonoyl (K)

K4 : Acetyl (K)

K5 : Acetyl (K)

Ions Score: 48 Expect: 0.031

| # | b      | b <sup>++</sup> | b <sup>*</sup> | b <sup>*++</sup> | b <sup>0</sup> | b <sup>0++</sup> | Seq. | y      | y <sup>++</sup> | y <sup>*</sup> | y <sup>*++</sup> | y <sup>0</sup> | y <sup>0++</sup> | # |
|---|--------|-----------------|----------------|------------------|----------------|------------------|------|--------|-----------------|----------------|------------------|----------------|------------------|---|
| 1 | 197.13 | 99.07           | 180.10         | 90.55            |                |                  | K    |        |                 |                |                  |                |                  | 9 |
| 2 | 254.15 | 127.58          | 237.12         | 119.07           |                |                  | G    | 902.53 | 451.77          | 885.50         | 443.26           | 884.52         | 442.76           | 8 |
| 3 | 341.18 | 171.09          | 324.16         | 162.58           | 323.17         | 162.09           | S    | 845.51 | 423.26          | 828.48         | 414.74           | 827.50         | 414.25           | 7 |
| 4 | 511.29 | 256.15          | 494.26         | 247.63           | 493.28         | 247.14           | K    | 758.48 | 379.74          | 741.45         | 371.23           | 740.47         | 370.74           | 6 |
| 5 | 681.39 | 341.20          | 664.37         | 332.69           | 663.38         | 332.19           | K    | 588.37 | 294.69          | 571.34         | 286.18           | 570.36         | 285.68           | 5 |
| 6 | 752.43 | 376.72          | 735.40         | 368.21           | 734.42         | 367.71           | A    | 418.27 | 209.64          | 401.24         | 201.12           | 400.26         | 200.63           | 4 |
| 7 | 851.50 | 426.25          | 834.47         | 417.74           | 833.49         | 417.25           | V    | 347.23 | 174.12          | 330.20         | 165.60           | 329.22         | 165.11           | 3 |
| 8 | 952.55 | 476.78          | 935.52         | 468.26           | 934.54         | 467.77           | T    | 248.16 | 124.58          | 231.13         | 116.07           | 230.15         | 115.58           | 2 |
| 9 |        |                 |                |                  |                |                  | K    | 147.11 | 74.06           | 130.09         | 65.55            |                |                  | 1 |

**KGSK<sub>cr</sub>K<sub>ac</sub>AVTK**

**H2BK15**

MS/MS Fragmentation of **KGSKKAVTK**

Found in **IPI00114642**, Tax\_Id=10090 Gene\_Symbol=Hist1h2bf;LOC100046213;Hist1

Match to Query 10904: 1055.634554 from(528.824553,2+)

Click mouse within plot area to zoom in by factor of two about that point

Or,   to  Da

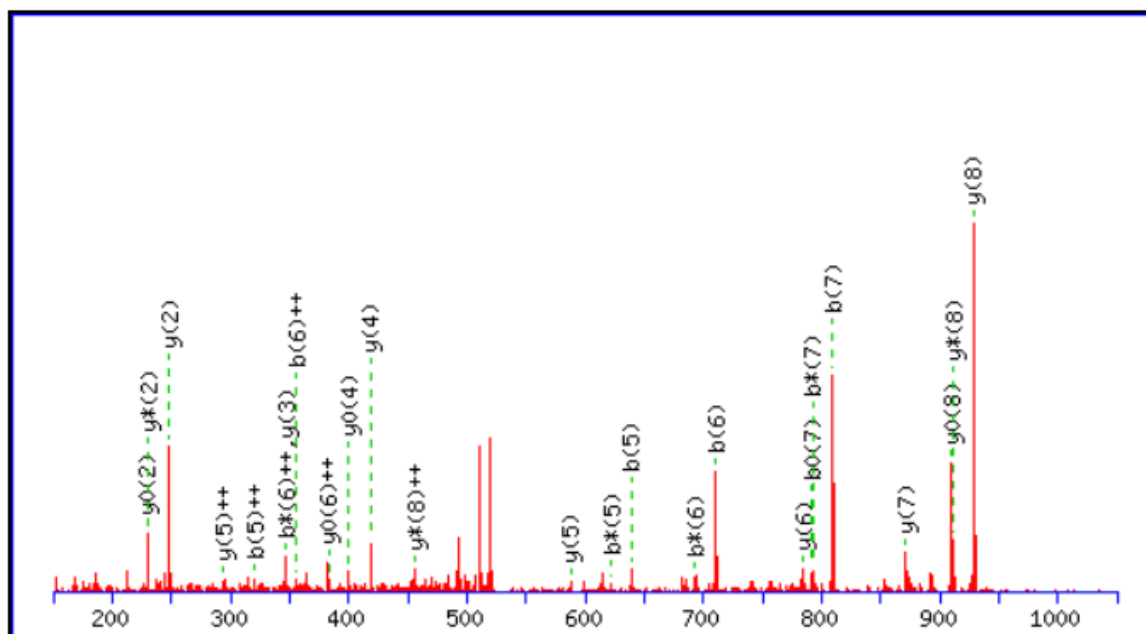

Monoisotopic mass of neutral peptide Mr(calc): 1055.63

Variable modifications:

K4 : Crotonoyl (K)

K5 : Acetyl (K)

Ions Score: 35 Expect: 0.72

| # | b      | b <sup>++</sup> | b <sup>*</sup> | b <sup>*++</sup> | b <sup>0</sup> | b <sup>0++</sup> | Seq. | y      | y <sup>++</sup> | y <sup>*</sup> | y <sup>*++</sup> | y <sup>0</sup> | y <sup>0++</sup> | # |
|---|--------|-----------------|----------------|------------------|----------------|------------------|------|--------|-----------------|----------------|------------------|----------------|------------------|---|
| 1 | 129.10 | 65.05           | 112.08         | 56.54            |                |                  | K    |        |                 |                |                  |                |                  | 9 |
| 2 | 186.12 | 93.57           | 169.10         | 85.05            |                |                  | G    | 928.55 | 464.78          | 911.52         | 456.26           | 910.54         | 455.77           | 8 |
| 3 | 273.16 | 137.08          | 256.13         | 128.57           | 255.15         | 128.08           | S    | 871.52 | 436.27          | 854.50         | 427.75           | 853.51         | 427.26           | 7 |
| 4 | 469.28 | 235.14          | 452.25         | 226.63           | 451.27         | 226.14           | K    | 784.49 | 392.75          | 767.47         | 384.24           | 766.48         | 383.74           | 6 |
| 5 | 639.38 | 320.19          | 622.36         | 311.68           | 621.37         | 311.19           | K    | 588.37 | 294.69          | 571.34         | 286.18           | 570.36         | 285.68           | 5 |
| 6 | 710.42 | 355.71          | 693.39         | 347.20           | 692.41         | 346.71           | A    | 418.27 | 209.64          | 401.24         | 201.12           | 400.26         | 200.63           | 4 |
| 7 | 809.49 | 405.25          | 792.46         | 396.73           | 791.48         | 396.24           | V    | 347.23 | 174.12          | 330.20         | 165.60           | 329.22         | 165.11           | 3 |
| 8 | 910.54 | 455.77          | 893.51         | 447.26           | 892.53         | 446.77           | T    | 248.16 | 124.58          | 231.13         | 116.07           | 230.15         | 115.58           | 2 |
| 9 |        |                 |                |                  |                |                  | K    | 147.11 | 74.06           | 130.09         | 65.55            |                |                  | 1 |

**KGSK<sub>ac</sub>K<sub>cr</sub>AVTK**

**H2BK16**

MS/MS Fragmentation of **KGSKKAVTK**

Found in **IPI00114642**, Tax\_Id=10090 Gene\_Symbol=Hist1h2bf;LOC100046213;His

Match to Query 10905: 1055.634924 from(528.824738,2+)

Click mouse within plot area to zoom in by factor of two about that point

Or,   to  Da

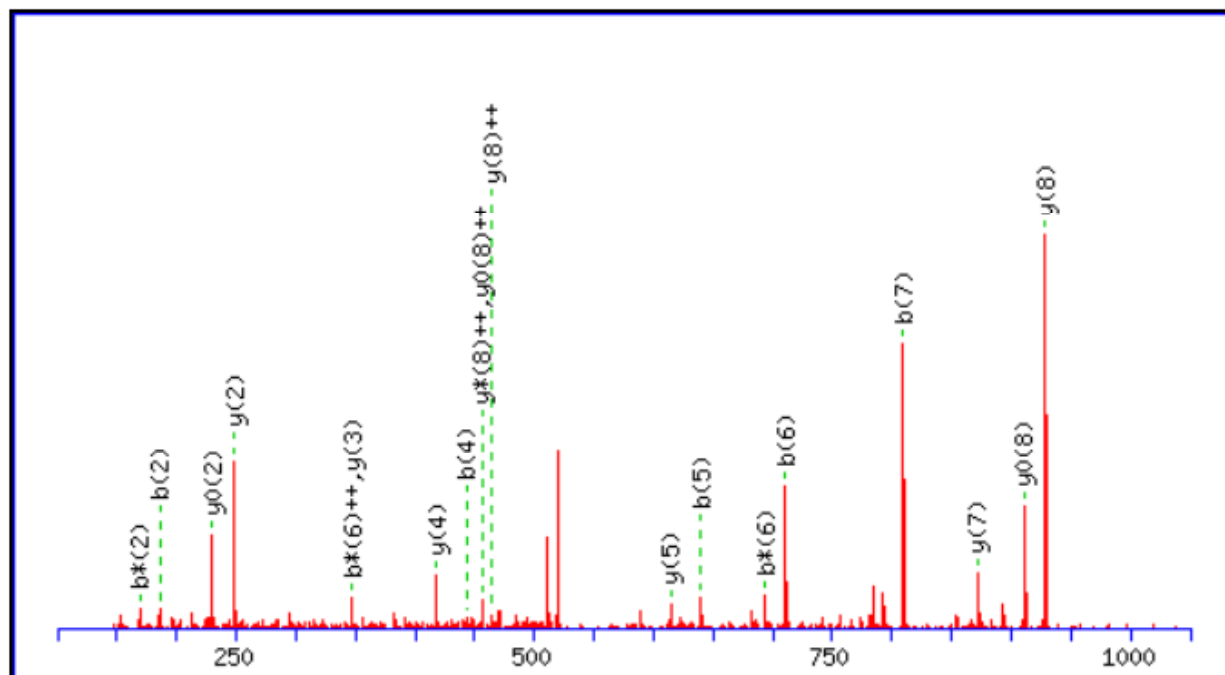

Monoisotopic mass of neutral peptide Mr(calc): 1055.63

Variable modifications:

K4 : Acetyl (K)

K5 : Crotonoyl (K)

Ions Score: 39 Expect: 0.28

| # | b      | b <sup>++</sup> | b <sup>*</sup> | b <sup>*++</sup> | b <sup>0</sup> | b <sup>0++</sup> | Seq. | y      | y <sup>++</sup> | y <sup>*</sup> | y <sup>*++</sup> | y <sup>0</sup> | y <sup>0++</sup> | # |
|---|--------|-----------------|----------------|------------------|----------------|------------------|------|--------|-----------------|----------------|------------------|----------------|------------------|---|
| 1 | 129.10 | 65.05           | 112.08         | 56.54            |                |                  | K    |        |                 |                |                  |                |                  | 9 |
| 2 | 186.12 | 93.57           | 169.10         | 85.05            |                |                  | G    | 928.55 | 464.78          | 911.52         | 456.26           | 910.54         | 455.77           | 8 |
| 3 | 273.16 | 137.08          | 256.13         | 128.57           | 255.15         | 128.08           | S    | 871.52 | 436.27          | 854.50         | 427.75           | 853.51         | 427.26           | 7 |
| 4 | 443.26 | 222.13          | 426.23         | 213.62           | 425.25         | 213.13           | K    | 784.49 | 392.75          | 767.47         | 384.24           | 766.48         | 383.74           | 6 |
| 5 | 639.38 | 320.19          | 622.36         | 311.68           | 621.37         | 311.19           | K    | 614.39 | 307.70          | 597.36         | 299.18           | 596.38         | 298.69           | 5 |
| 6 | 710.42 | 355.71          | 693.39         | 347.20           | 692.41         | 346.71           | A    | 418.27 | 209.64          | 401.24         | 201.12           | 400.26         | 200.63           | 4 |
| 7 | 809.49 | 405.25          | 792.46         | 396.73           | 791.48         | 396.24           | V    | 347.23 | 174.12          | 330.20         | 165.60           | 329.22         | 165.11           | 3 |
| 8 | 910.54 | 455.77          | 893.51         | 447.26           | 892.53         | 446.77           | T    | 248.16 | 124.58          | 231.13         | 116.07           | 230.15         | 115.58           | 2 |
| 9 |        |                 |                |                  |                |                  | K    | 147.11 | 74.06           | 130.09         | 65.55            |                |                  | 1 |

**GSK<sub>ac</sub>K<sub>ac</sub>AVTK<sub>cr</sub>AQK****H2BK20**MS/MS Fragmentation of **GSKKAVTKAQK**Found in **IPI00114642**, Tax\_Id=10090 Gene\_Symbol=Hist1h2bf,LOC100046213;Hist1

Match to Query 18173: 1296.740274 from(649.377413,2+)

Click mouse within plot area to zoom in by factor of two about that point

Or,   to  Da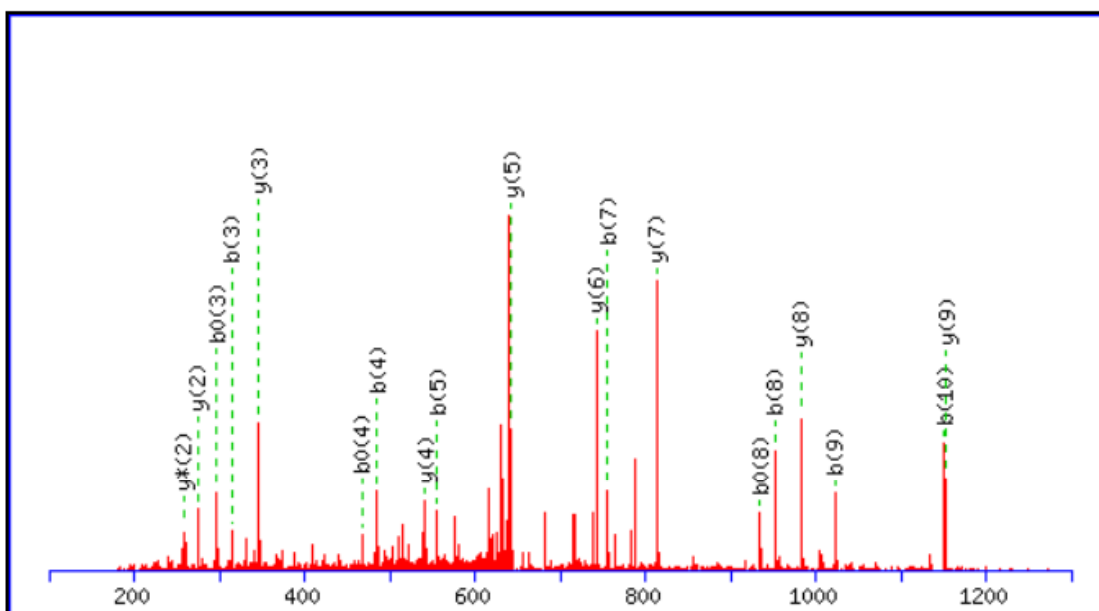

Monoisotopic mass of neutral peptide Mr(calc): 1296.74

Variable modifications:

K3 : Acetyl (K)

K4 : Acetyl (K)

K8 : Crotonoyl (K)

Ions Score: 57 Expect: 0.0053

| #  | b       | b <sup>++</sup> | b <sup>*</sup> | b <sup>*++</sup> | b <sup>0</sup> | b <sup>0++</sup> | Seq. | y       | y <sup>++</sup> | y <sup>*</sup> | y <sup>*++</sup> | y <sup>0</sup> | y <sup>0++</sup> | #  |
|----|---------|-----------------|----------------|------------------|----------------|------------------|------|---------|-----------------|----------------|------------------|----------------|------------------|----|
| 1  | 58.03   | 29.52           |                |                  |                |                  | G    |         |                 |                |                  |                |                  | 11 |
| 2  | 145.06  | 73.03           |                |                  | 127.05         | 64.03            | S    | 1240.73 | 620.87          | 1223.70        | 612.35           | 1222.72        | 611.86           | 10 |
| 3  | 315.17  | 158.09          | 298.14         | 149.57           | 297.16         | 149.08           | K    | 1153.69 | 577.35          | 1136.67        | 568.84           | 1135.68        | 568.35           | 9  |
| 4  | 485.27  | 243.14          | 468.25         | 234.63           | 467.26         | 234.13           | K    | 983.59  | 492.30          | 966.56         | 483.78           | 965.58         | 483.29           | 8  |
| 5  | 556.31  | 278.66          | 539.28         | 270.14           | 538.30         | 269.65           | A    | 813.48  | 407.25          | 796.46         | 398.73           | 795.47         | 398.24           | 7  |
| 6  | 655.38  | 328.19          | 638.35         | 319.68           | 637.37         | 319.19           | V    | 742.45  | 371.73          | 725.42         | 363.21           | 724.44         | 362.72           | 6  |
| 7  | 756.43  | 378.72          | 739.40         | 370.20           | 738.41         | 369.71           | T    | 643.38  | 322.19          | 626.35         | 313.68           | 625.37         | 313.19           | 5  |
| 8  | 952.55  | 476.78          | 935.52         | 468.26           | 934.54         | 467.77           | K    | 542.33  | 271.67          | 525.30         | 263.16           |                |                  | 4  |
| 9  | 1023.58 | 512.30          | 1006.56        | 503.78           | 1005.57        | 503.29           | A    | 346.21  | 173.61          | 329.18         | 165.09           |                |                  | 3  |
| 10 | 1151.64 | 576.32          | 1134.62        | 567.81           | 1133.63        | 567.32           | Q    | 275.17  | 138.09          | 258.14         | 129.58           |                |                  | 2  |
| 11 |         |                 |                |                  |                |                  | K    | 147.11  | 74.06           | 130.09         | 65.55            |                |                  | 1  |

**AVTK<sub>ac</sub>AQK<sub>cr</sub>K****H2BK23**MS/MS Fragmentation of **AVTKAQKK**Found in **IPI00114642**, Tax\_Id=10090 Gene\_Symbol=Hist1h2bf;LOC100046213;Hist

Match to Query 8439: 982.580604 from(492.297578,2+)

Click mouse within plot area to zoom in by factor of two about that point

Or,   to  Da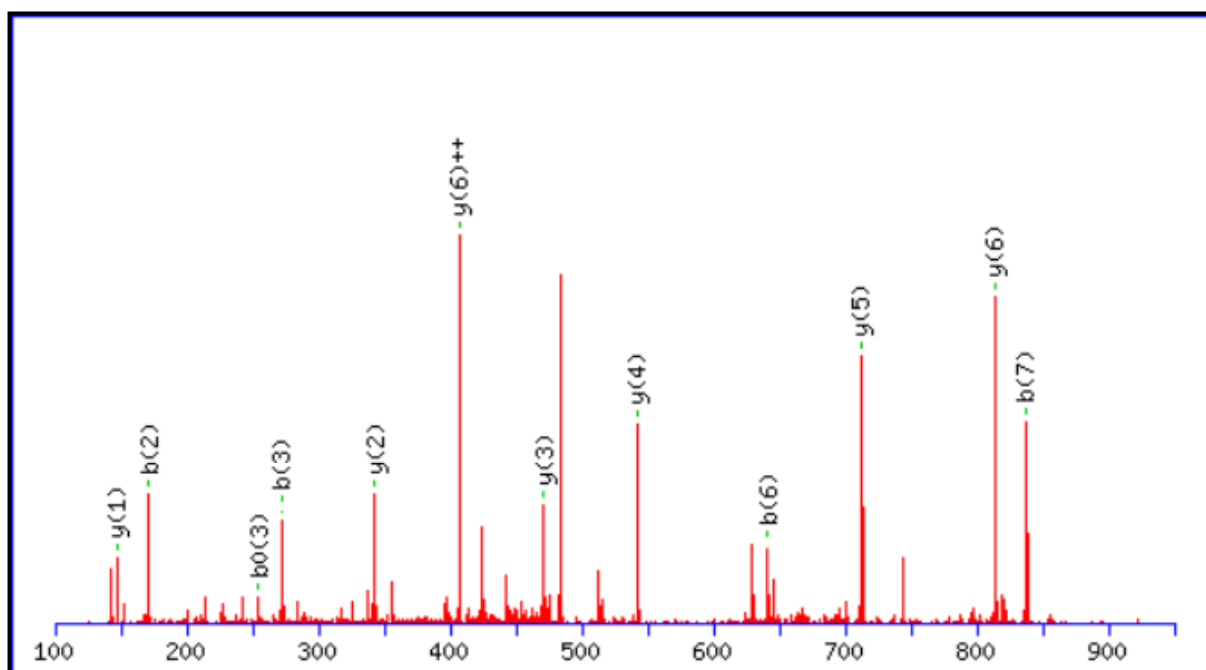

Monoisotopic mass of neutral peptide Mr(calc): 982.58

Variable modifications:

K4 : Acetyl (K)

K7 : Crotonoyl (K)

Ions Score: 48 Expect: 0.027

| # | b      | b <sup>++</sup> | b <sup>*</sup> | b <sup>*++</sup> | b <sup>0</sup> | b <sup>0++</sup> | Seq. | y      | y <sup>++</sup> | y <sup>*</sup> | y <sup>*++</sup> | y <sup>0</sup> | y <sup>0++</sup> | # |
|---|--------|-----------------|----------------|------------------|----------------|------------------|------|--------|-----------------|----------------|------------------|----------------|------------------|---|
| 1 | 72.04  | 36.53           |                |                  |                |                  | A    |        |                 |                |                  |                |                  | 8 |
| 2 | 171.11 | 86.06           |                |                  |                |                  | V    | 912.55 | 456.78          | 895.52         | 448.27           | 894.54         | 447.77           | 7 |
| 3 | 272.16 | 136.58          |                |                  | 254.15         | 127.58           | T    | 813.48 | 407.25          | 796.46         | 398.73           | 795.47         | 398.24           | 6 |
| 4 | 442.27 | 221.64          | 425.24         | 213.12           | 424.26         | 212.63           | K    | 712.44 | 356.72          | 695.41         | 348.21           |                |                  | 5 |
| 5 | 513.30 | 257.16          | 496.28         | 248.64           | 495.29         | 248.15           | A    | 542.33 | 271.67          | 525.30         | 263.16           |                |                  | 4 |
| 6 | 641.36 | 321.18          | 624.34         | 312.67           | 623.35         | 312.18           | Q    | 471.29 | 236.15          | 454.27         | 227.64           |                |                  | 3 |
| 7 | 837.48 | 419.25          | 820.46         | 410.73           | 819.47         | 410.24           | K    | 343.23 | 172.12          | 326.21         | 163.61           |                |                  | 2 |
| 8 |        |                 |                |                  |                |                  | K    | 147.11 | 74.06           | 130.09         | 65.55            |                |                  | 1 |

K<sub>cr</sub>ESYSVYVYK

H2BK34

MS/MS Fragmentation of **KESYSVYVYK**

Found in **gi|122016**, Histone H2B type 1-F/J/L (H2B 291A)

Match to Query 25032: 1332.656044 from(667.335298,2+)

Click mouse within plot area to zoom in by factor of two about that point

Or,   to  Da

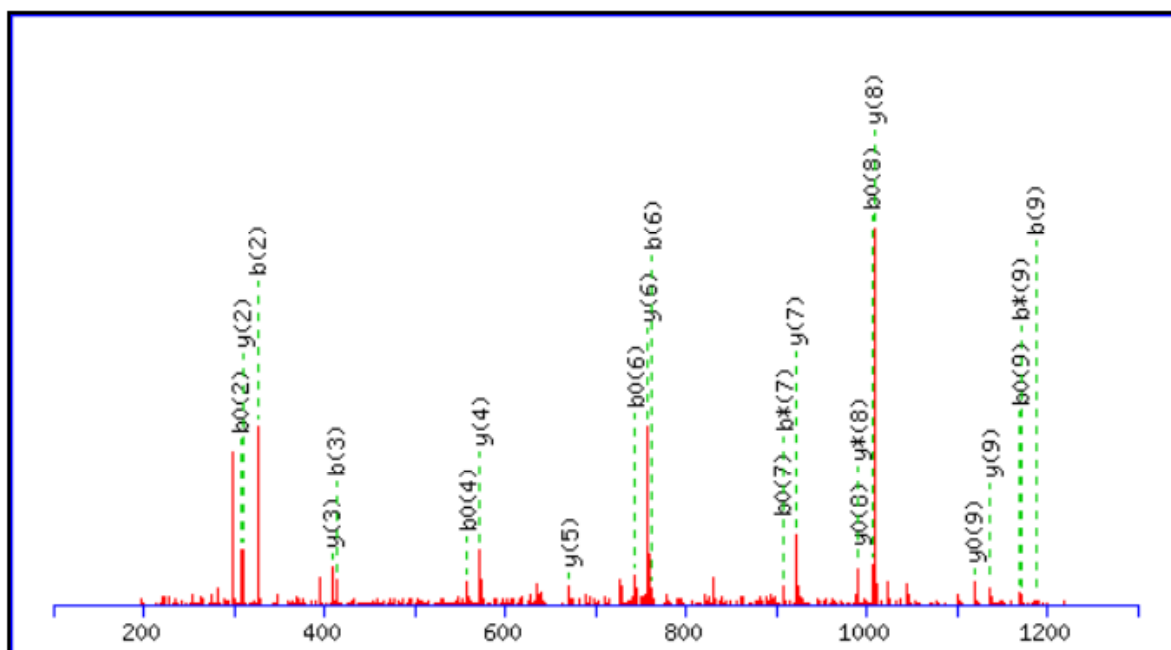

Monoisotopic mass of neutral peptide Mr(calc): 1332.66

Variable modifications:

K1 : Crotonoyl (K)

Ions Score: 40 Expect: 0.0092

| #  | b       | b <sup>++</sup> | b <sup>*</sup> | b <sup>*++</sup> | b <sup>0</sup> | b <sup>0++</sup> | Seq. | y       | y <sup>++</sup> | y <sup>*</sup> | y <sup>*++</sup> | y <sup>0</sup> | y <sup>0++</sup> | #  |
|----|---------|-----------------|----------------|------------------|----------------|------------------|------|---------|-----------------|----------------|------------------|----------------|------------------|----|
| 1  | 197.13  | 99.07           | 180.10         | 90.55            |                |                  | K    |         |                 |                |                  |                |                  | 10 |
| 2  | 326.17  | 163.59          | 309.14         | 155.08           | 308.16         | 154.58           | E    | 1137.55 | 569.28          | 1120.52        | 560.76           | 1119.54        | 560.27           | 9  |
| 3  | 413.20  | 207.11          | 396.18         | 198.59           | 395.19         | 198.10           | S    | 1008.50 | 504.76          | 991.48         | 496.24           | 990.49         | 495.75           | 8  |
| 4  | 576.27  | 288.64          | 559.24         | 280.12           | 558.26         | 279.63           | Y    | 921.47  | 461.24          | 904.45         | 452.73           | 903.46         | 452.23           | 7  |
| 5  | 663.30  | 332.15          | 646.27         | 323.64           | 645.29         | 323.15           | S    | 758.41  | 379.71          | 741.38         | 371.19           | 740.40         | 370.70           | 6  |
| 6  | 762.37  | 381.69          | 745.34         | 373.17           | 744.36         | 372.68           | V    | 671.38  | 336.19          | 654.35         | 327.68           |                |                  | 5  |
| 7  | 925.43  | 463.22          | 908.40         | 454.71           | 907.42         | 454.21           | Y    | 572.31  | 286.66          | 555.28         | 278.14           |                |                  | 4  |
| 8  | 1024.50 | 512.75          | 1007.47        | 504.24           | 1006.49        | 503.75           | V    | 409.24  | 205.13          | 392.22         | 196.61           |                |                  | 3  |
| 9  | 1187.56 | 594.28          | 1170.54        | 585.77           | 1169.55        | 585.28           | Y    | 310.18  | 155.59          | 293.15         | 147.08           |                |                  | 2  |
| 10 |         |                 |                |                  |                |                  | K    | 147.11  | 74.06           | 130.09         | 65.55            |                |                  | 1  |

TK<sub>cr</sub>QTAR

H3K4

MS/MS Fragmentation of **TKQTAR**Found in **IPI00230730**, Tax\_Id=10090 Gene\_Symbol=Hist1h3d;Hist2h3c2;Hist2h3b;H

Match to Query 1700: 771.425324 from(386.719938,2+)

Click mouse within plot area to zoom in by factor of two about that point

Or,   to  Da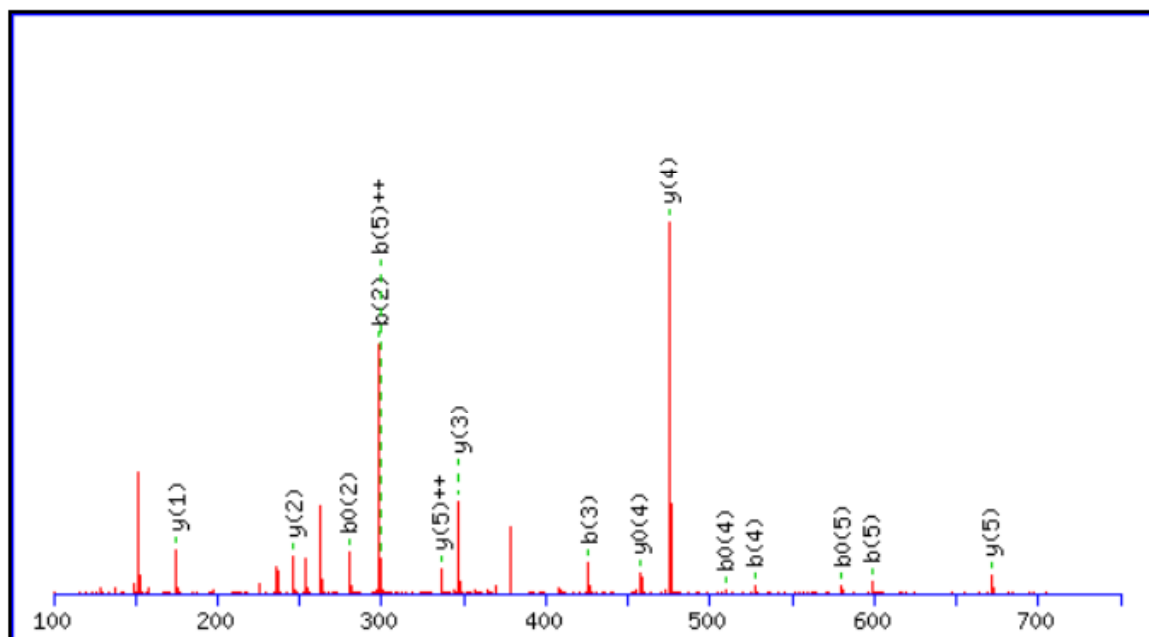

Monoisotopic mass of neutral peptide Mr(calc): 771.42

Variable modifications:

K2 : Crotonoyl (K)

Ions Score: 33 Expect: 0.97

| # | b             | b <sup>++</sup> | b*     | b <sup>*++</sup> | b <sup>0</sup> | b <sup>0++</sup> | Seq. | y             | y <sup>++</sup> | y*     | y <sup>*++</sup> | y <sup>0</sup> | y <sup>0++</sup> | # |
|---|---------------|-----------------|--------|------------------|----------------|------------------|------|---------------|-----------------|--------|------------------|----------------|------------------|---|
| 1 | 102.05        | 51.53           |        |                  | 84.04          | 42.53            | T    |               |                 |        |                  |                |                  | 6 |
| 2 | <b>298.18</b> | 149.59          | 281.15 | 141.08           | <b>280.17</b>  | 140.59           | K    | <b>671.38</b> | <b>336.20</b>   | 654.36 | 327.68           | 653.37         | 327.19           | 5 |
| 3 | <b>426.23</b> | 213.62          | 409.21 | 205.11           | 408.22         | 204.62           | Q    | <b>475.26</b> | 238.13          | 458.24 | 229.62           | <b>457.25</b>  | 229.13           | 4 |
| 4 | <b>527.28</b> | 264.14          | 510.26 | 255.63           | <b>509.27</b>  | 255.14           | T    | <b>347.20</b> | 174.11          | 330.18 | 165.59           | 329.19         | 165.10           | 3 |
| 5 | <b>598.32</b> | <b>299.66</b>   | 581.29 | 291.15           | <b>580.31</b>  | 290.66           | A    | <b>246.16</b> | 123.58          | 229.13 | 115.07           |                |                  | 2 |
| 6 |               |                 |        |                  |                |                  | R    | <b>175.12</b> | 88.06           | 158.09 | 79.55            |                |                  | 1 |

**K<sub>cr</sub>STGGK<sub>ac</sub>APR****H3K9**MS/MS Fragmentation of **KSTGGKAPR**Found in **IPI00230730**, Tax\_Id=10090 Gene\_Symbol=Hist1h3d;Hist2h3c2;Hist2h3b;F

Match to Query 9206: 1010.550634 from(506.282593,2+)

Click mouse within plot area to zoom in by factor of two about that point

Or,   to  Da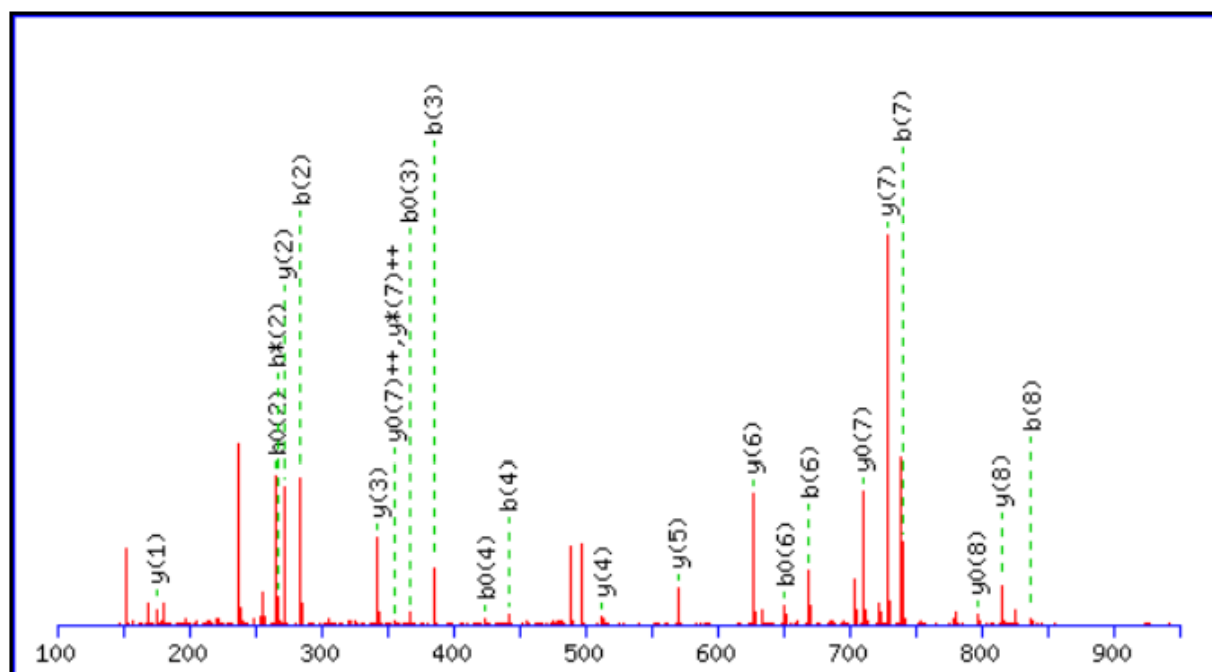

Monoisotopic mass of neutral peptide Mr(calc): 1010.55

Variable modifications:

K1 : Crotonoyl (K)

K6 : Acetyl (K)

Ions Score: 46 Expect: 0.041

| # | b      | b <sup>++</sup> | b <sup>*</sup> | b <sup>*++</sup> | b <sup>0</sup> | b <sup>0++</sup> | Seq. | y      | y <sup>++</sup> | y <sup>*</sup> | y <sup>*++</sup> | y <sup>0</sup> | y <sup>0++</sup> | # |
|---|--------|-----------------|----------------|------------------|----------------|------------------|------|--------|-----------------|----------------|------------------|----------------|------------------|---|
| 1 | 197.13 | 99.07           | 180.10         | 90.55            |                |                  | K    |        |                 |                |                  |                |                  | 9 |
| 2 | 284.16 | 142.58          | 267.13         | 134.07           | 266.15         | 133.58           | S    | 815.44 | 408.22          | 798.41         | 399.71           | 797.43         | 399.22           | 8 |
| 3 | 385.21 | 193.11          | 368.18         | 184.59           | 367.20         | 184.10           | T    | 728.40 | 364.71          | 711.38         | 356.19           | 710.39         | 355.70           | 7 |
| 4 | 442.23 | 221.62          | 425.20         | 213.11           | 424.22         | 212.61           | G    | 627.36 | 314.18          | 610.33         | 305.67           |                |                  | 6 |
| 5 | 499.25 | 250.13          | 482.22         | 241.62           | 481.24         | 241.12           | G    | 570.34 | 285.67          | 553.31         | 277.16           |                |                  | 5 |
| 6 | 669.36 | 335.18          | 652.33         | 326.67           | 651.35         | 326.18           | K    | 513.31 | 257.16          | 496.29         | 248.65           |                |                  | 4 |
| 7 | 740.39 | 370.70          | 723.37         | 362.19           | 722.38         | 361.70           | A    | 343.21 | 172.11          | 326.18         | 163.59           |                |                  | 3 |
| 8 | 837.45 | 419.23          | 820.42         | 410.71           | 819.44         | 410.22           | P    | 272.17 | 136.59          | 255.15         | 128.08           |                |                  | 2 |
| 9 |        |                 |                |                  |                |                  | R    | 175.12 | 88.06           | 158.09         | 79.55            |                |                  | 1 |

K<sub>cr</sub>QLATK

H3K18

MS/MS Fragmentation of **KQLATK**

Found in **IPI00230730**, Tax\_Id=10090 Gene\_Symbol=Hist1h3d;Hist2h3c2;Hist2h3b;F

Match to Query 1202: 755.437904 from(378.726228,2+)

Click mouse within plot area to zoom in by factor of two about that point

Or,   to  Da

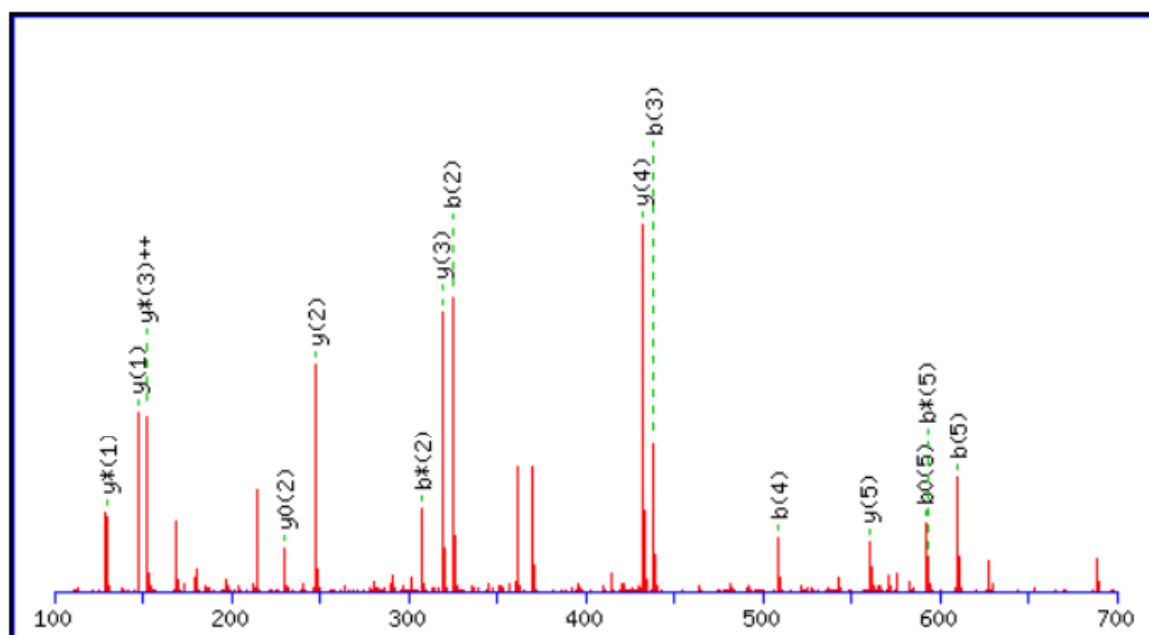

Monoisotopic mass of neutral peptide Mr(calc): 755.45

Variable modifications:

K1 : Crotonoyl (K)

Ions Score: 40 Expect: 0.2

| # | b      | b <sup>++</sup> | b <sup>*</sup> | b <sup>++</sup> * | b <sup>0</sup> | b <sup>0++</sup> | Seq. | y      | y <sup>++</sup> | y <sup>*</sup> | y <sup>++</sup> * | y <sup>0</sup> | y <sup>0++</sup> | # |
|---|--------|-----------------|----------------|-------------------|----------------|------------------|------|--------|-----------------|----------------|-------------------|----------------|------------------|---|
| 1 | 197.13 | 99.07           | 180.10         | 90.55             |                |                  | K    |        |                 |                |                   |                |                  | 6 |
| 2 | 325.19 | 163.10          | 308.16         | 154.58            |                |                  | Q    | 560.34 | 280.67          | 543.31         | 272.16            | 542.33         | 271.67           | 5 |
| 3 | 438.27 | 219.64          | 421.24         | 211.13            |                |                  | L    | 432.28 | 216.64          | 415.26         | 208.13            | 414.27         | 207.64           | 4 |
| 4 | 509.31 | 255.16          | 492.28         | 246.64            |                |                  | A    | 319.20 | 160.10          | 302.17         | 151.59            | 301.19         | 151.10           | 3 |
| 5 | 610.36 | 305.68          | 593.33         | 297.17            | 592.35         | 296.68           | T    | 248.16 | 124.58          | 231.13         | 116.07            | 230.15         | 115.58           | 2 |
| 6 |        |                 |                |                   |                |                  | K    | 147.11 | 74.06           | 130.09         | 65.55             |                |                  | 1 |

**K<sub>ac</sub>QLATK<sub>cr</sub>AAR**

**H3K23**

MS/MS Fragmentation of **KQLATKAAR**

Found in **IPI00230730**, Tax\_Id=10090 Gene\_Symbol=Hist1h3d;Hist2h3c2;Hist2h3b;Hi

Match to Query 12124: 1095.641144 from(548.827848,2+)

Click mouse within plot area to zoom in by factor of two about that point

Or,   to  Da

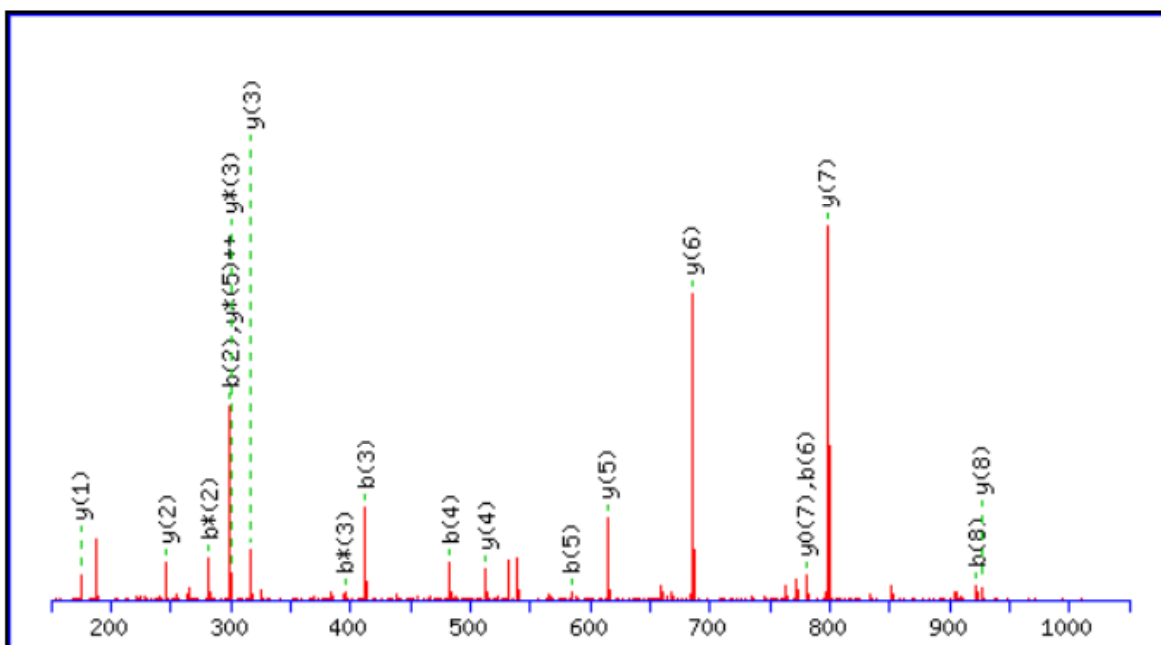

Monoisotopic mass of neutral peptide Mr(calc): 1095.64

Variable modifications:

K1 : Acetyl (K)

K6 : Crotonoyl (K)

Ions Score: 54 Expect: 0.007

| # | b      | b <sup>++</sup> | b <sup>*</sup> | b <sup>*++</sup> | b <sup>0</sup> | b <sup>0++</sup> | Seq. | y      | y <sup>++</sup> | y <sup>*</sup> | y <sup>*++</sup> | y <sup>0</sup> | y <sup>0++</sup> | # |
|---|--------|-----------------|----------------|------------------|----------------|------------------|------|--------|-----------------|----------------|------------------|----------------|------------------|---|
| 1 | 171.11 | 86.06           | 154.09         | 77.55            |                |                  | K    |        |                 |                |                  |                |                  | 9 |
| 2 | 299.17 | 150.09          | 282.14         | 141.58           |                |                  | Q    | 926.54 | 463.77          | 909.52         | 455.26           | 908.53         | 454.77           | 8 |
| 3 | 412.26 | 206.63          | 395.23         | 198.12           |                |                  | L    | 798.48 | 399.75          | 781.46         | 391.23           | 780.47         | 390.74           | 7 |
| 4 | 483.29 | 242.15          | 466.27         | 233.64           |                |                  | A    | 685.40 | 343.20          | 668.37         | 334.69           | 667.39         | 334.20           | 6 |
| 5 | 584.34 | 292.67          | 567.31         | 284.16           | 566.33         | 283.67           | T    | 614.36 | 307.68          | 597.34         | 299.17           | 596.35         | 298.68           | 5 |
| 6 | 780.46 | 390.73          | 763.43         | 382.22           | 762.45         | 381.73           | K    | 513.31 | 257.16          | 496.29         | 248.65           |                |                  | 4 |
| 7 | 851.50 | 426.25          | 834.47         | 417.74           | 833.49         | 417.25           | A    | 317.19 | 159.10          | 300.17         | 150.59           |                |                  | 3 |
| 8 | 922.54 | 461.77          | 905.51         | 453.26           | 904.53         | 452.77           | A    | 246.16 | 123.58          | 229.13         | 115.07           |                |                  | 2 |
| 9 |        |                 |                |                  |                |                  | R    | 175.12 | 88.06           | 158.09         | 79.55            |                |                  | 1 |

K<sub>cr</sub>SAPATGGVK

H3K27

MS/MS Fragmentation of **KSAPATGGVK**

Found in **IPI00230730**, Tax\_Id=10090 Gene\_Symbol=Hist1h3d;Hist2h3c2;Hist2h3b;F

Match to Query 8421: 982.518104 from(492.266328,2+)

Click mouse within plot area to zoom in by factor of two about that point

Or,   to  Da

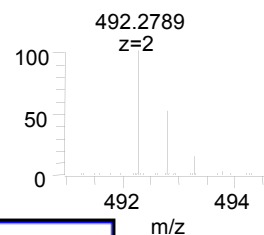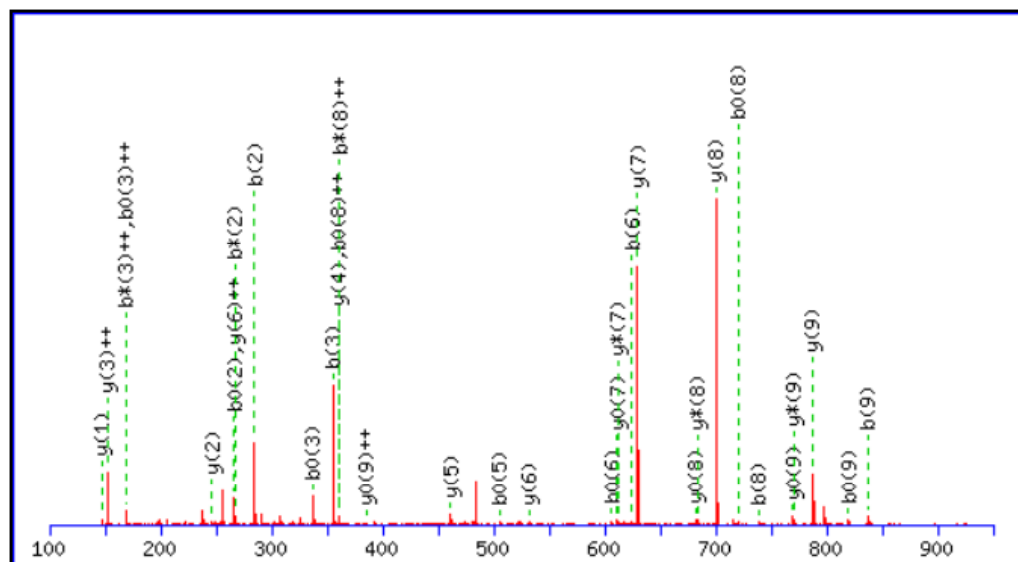

Monoisotopic mass of neutral peptide Mr(calc): 982.54

Variable modifications:

K1 : Crotonoyl (K)

Ions Score: 42 Expect: 0.12

| #  | b      | b <sup>++</sup> | b <sup>*</sup> | b <sup>*++</sup> | b <sup>0</sup> | b <sup>0++</sup> | Seq. | y      | y <sup>++</sup> | y <sup>*</sup> | y <sup>*++</sup> | y <sup>0</sup> | y <sup>0++</sup> | #  |
|----|--------|-----------------|----------------|------------------|----------------|------------------|------|--------|-----------------|----------------|------------------|----------------|------------------|----|
| 1  | 197.13 | 99.07           | 180.10         | 90.55            |                |                  | K    |        |                 |                |                  |                |                  | 10 |
| 2  | 284.16 | 142.58          | 267.13         | 134.07           | 266.15         | 133.58           | S    | 787.43 | 394.22          | 770.40         | 385.71           | 769.42         | 385.21           | 9  |
| 3  | 355.20 | 178.10          | 338.17         | 169.59           | 337.19         | 169.10           | A    | 700.40 | 350.70          | 683.37         | 342.19           | 682.39         | 341.70           | 8  |
| 4  | 452.25 | 226.63          | 435.22         | 218.12           | 434.24         | 217.62           | P    | 629.36 | 315.18          | 612.34         | 306.67           | 611.35         | 306.18           | 7  |
| 5  | 523.29 | 262.15          | 506.26         | 253.63           | 505.28         | 253.14           | A    | 532.31 | 266.66          | 515.28         | 258.14           | 514.30         | 257.65           | 6  |
| 6  | 624.34 | 312.67          | 607.31         | 304.16           | 606.32         | 303.67           | T    | 461.27 | 231.14          | 444.25         | 222.63           | 443.26         | 222.13           | 5  |
| 7  | 681.36 | 341.18          | 664.33         | 332.67           | 663.35         | 332.18           | G    | 360.22 | 180.62          | 343.20         | 172.10           |                |                  | 4  |
| 8  | 738.38 | 369.69          | 721.35         | 361.18           | 720.37         | 360.69           | G    | 303.20 | 152.10          | 286.18         | 143.59           |                |                  | 3  |
| 9  | 837.45 | 419.23          | 820.42         | 410.71           | 819.44         | 410.22           | V    | 246.18 | 123.59          | 229.15         | 115.08           |                |                  | 2  |
| 10 |        |                 |                |                  |                |                  | K    | 147.11 | 74.06           | 130.09         | 65.55            |                |                  | 1  |

# YQK<sub>cr</sub>STELLIR

# H3K56

MS/MS Fragmentation of **YQKSTELLIR**

Found in **IPI00230730**, Tax\_Id=10090 Gene\_Symbol=Hist1h3d;Hist2h3c2;Hist2h3b;F

Match to Query 18639: 1317.729044 from(659.871798,2+)

Click mouse within plot area to zoom in by factor of two about that point

Or,   to  Da

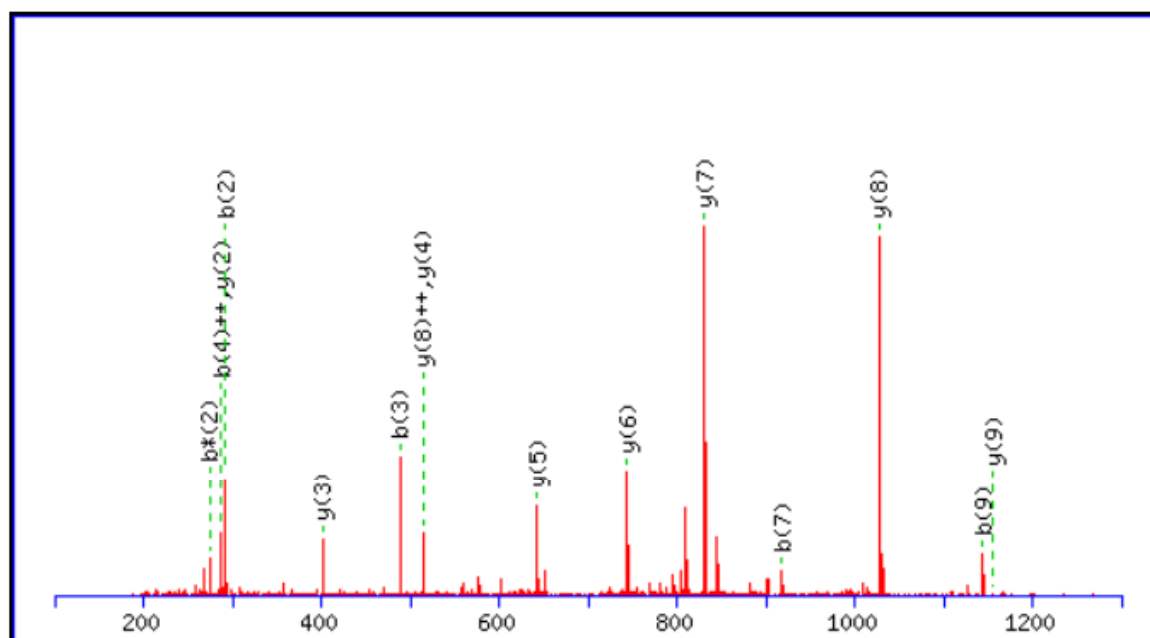

Monoisotopic mass of neutral peptide Mr(calc): 1317.73

Variable modifications:

K3 : Crotonoyl (K)

Ions Score: 47 Expect: 0.044

| #  | b       | b <sup>++</sup> | b*      | b* <sup>++</sup> | b <sup>0</sup> | b <sup>0++</sup> | Seq. | y       | y <sup>++</sup> | y*      | y* <sup>++</sup> | y <sup>0</sup> | y <sup>0++</sup> | #  |
|----|---------|-----------------|---------|------------------|----------------|------------------|------|---------|-----------------|---------|------------------|----------------|------------------|----|
| 1  | 164.07  | 82.54           |         |                  |                |                  | Y    |         |                 |         |                  |                |                  | 10 |
| 2  | 292.13  | 146.57          | 275.10  | 138.05           |                |                  | Q    | 1155.67 | 578.34          | 1138.65 | 569.83           | 1137.66        | 569.33           | 9  |
| 3  | 488.25  | 244.63          | 471.22  | 236.12           |                |                  | K    | 1027.61 | 514.31          | 1010.59 | 505.80           | 1009.60        | 505.31           | 8  |
| 4  | 575.28  | 288.14          | 558.26  | 279.63           | 557.27         | 279.14           | S    | 831.49  | 416.25          | 814.47  | 407.74           | 813.48         | 407.25           | 7  |
| 5  | 676.33  | 338.67          | 659.30  | 330.16           | 658.32         | 329.66           | T    | 744.46  | 372.73          | 727.43  | 364.22           | 726.45         | 363.73           | 6  |
| 6  | 805.37  | 403.19          | 788.35  | 394.68           | 787.36         | 394.18           | E    | 643.41  | 322.21          | 626.39  | 313.70           | 625.40         | 313.21           | 5  |
| 7  | 918.46  | 459.73          | 901.43  | 451.22           | 900.45         | 450.73           | L    | 514.37  | 257.69          | 497.34  | 249.18           |                |                  | 4  |
| 8  | 1031.54 | 516.27          | 1014.51 | 507.76           | 1013.53        | 507.27           | L    | 401.29  | 201.15          | 384.26  | 192.63           |                |                  | 3  |
| 9  | 1144.62 | 572.82          | 1127.60 | 564.30           | 1126.61        | 563.81           | I    | 288.20  | 144.61          | 271.18  | 136.09           |                |                  | 2  |
| 10 |         |                 |         |                  |                |                  | R    | 175.12  | 88.06           | 158.09  | 79.55            |                |                  | 1  |

GK<sub>cr</sub>GGK<sub>cr</sub>GLGK

H4K5, K8

MS/MS Fragmentation of **GKGGKGLGK**

Found in **IPI00623776**, Tax\_Id=10090 Gene\_Symbol=LOC674678 similar to histone H4

Match to Query 7071: 936.539404 from(469.276978,2+)

Click mouse within plot area to zoom in by factor of two about that point

Or,   to  Da

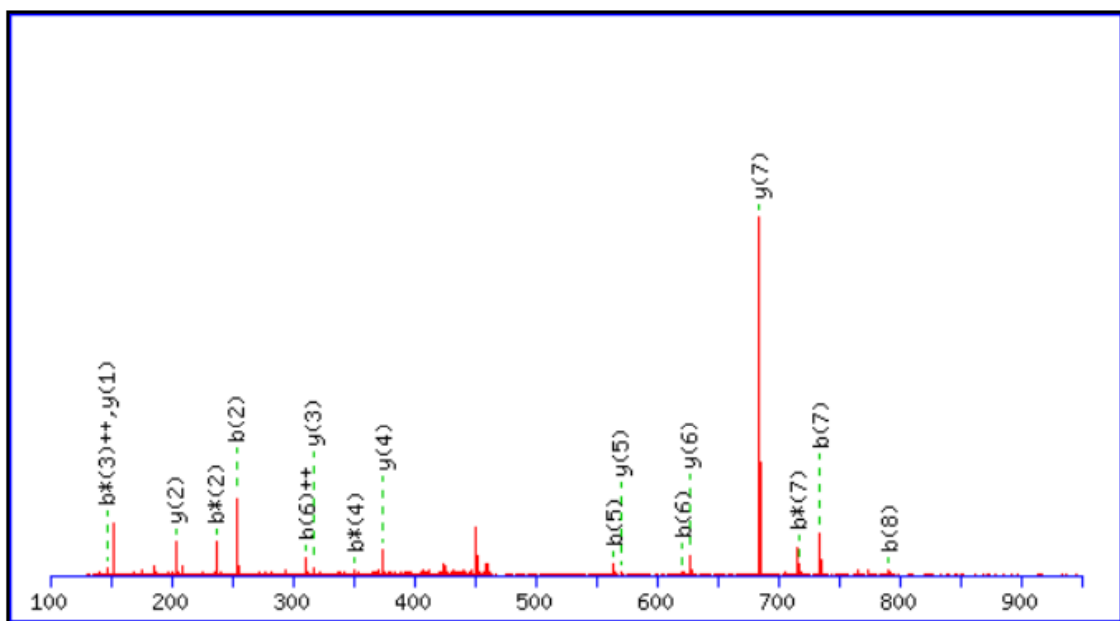

Monoisotopic mass of neutral peptide Mr(calc): 936.54

Variable modifications:

K2 : Crotonoyl (K)

K5 : Crotonoyl (K)

Ions Score: 40 Expect: 0.16

| # | b      | b <sup>++</sup> | b <sup>*</sup> | b <sup>*++</sup> | Seq. | y      | y <sup>++</sup> | y <sup>*</sup> | y <sup>*++</sup> | # |
|---|--------|-----------------|----------------|------------------|------|--------|-----------------|----------------|------------------|---|
| 1 | 58.03  | 29.52           |                |                  | G    |        |                 |                |                  | 9 |
| 2 | 254.15 | 127.58          | 237.12         | 119.07           | K    | 880.53 | 440.77          | 863.50         | 432.25           | 8 |
| 3 | 311.17 | 156.09          | 294.14         | 147.58           | G    | 684.40 | 342.71          | 667.38         | 334.19           | 7 |
| 4 | 368.19 | 184.60          | 351.17         | 176.09           | G    | 627.38 | 314.19          | 610.36         | 305.68           | 6 |
| 5 | 564.31 | 282.66          | 547.29         | 274.15           | K    | 570.36 | 285.68          | 553.33         | 277.17           | 5 |
| 6 | 621.34 | 311.17          | 604.31         | 302.66           | G    | 374.24 | 187.62          | 357.21         | 179.11           | 4 |
| 7 | 734.42 | 367.71          | 717.39         | 359.20           | L    | 317.22 | 159.11          | 300.19         | 150.60           | 3 |
| 8 | 791.44 | 396.22          | 774.41         | 387.71           | G    | 204.13 | 102.57          | 187.11         | 94.06            | 2 |
| 9 |        |                 |                |                  | K    | 147.11 | 74.06           | 130.09         | 65.55            | 1 |

**GLGK<sub>ac</sub>GGAK<sub>cr</sub>R****H4K16**MS/MS Fragmentation of **GLGKGGAKR**Found in **IPI00621374**, Tax\_Id=10090 Gene\_Symbol=- 11 kDa protein

Match to Query 7541: 952.544044 from(477.279298,2+)

Click mouse within plot area to zoom in by factor of two about that point

Or,   to  Da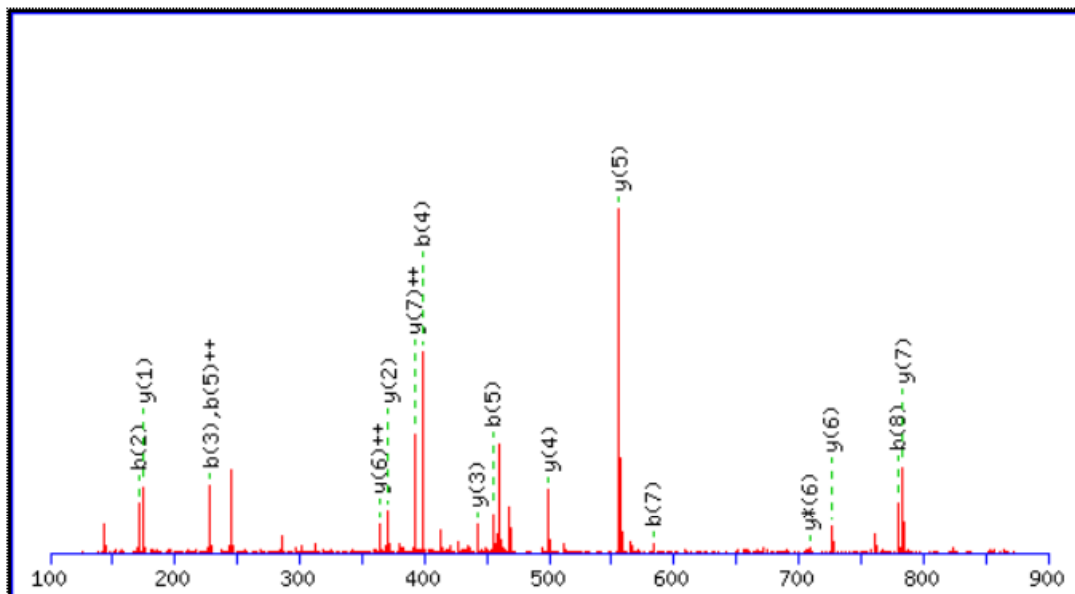

Monoisotopic mass of neutral peptide Mr(calc): 952.55

Variable modifications:

K4 : Acetyl (K)

K8 : Crotonoyl (K)

Ions Score: 41 Expect: 0.14

| # | b      | b <sup>++</sup> | b*     | b* <sup>++</sup> | Seq. | y      | y <sup>++</sup> | y*     | y* <sup>++</sup> | # |
|---|--------|-----------------|--------|------------------|------|--------|-----------------|--------|------------------|---|
| 1 | 58.03  | 29.52           |        |                  | G    |        |                 |        |                  | 9 |
| 2 | 171.11 | 86.06           |        |                  | L    | 896.53 | 448.77          | 879.50 | 440.26           | 8 |
| 3 | 228.13 | 114.57          |        |                  | G    | 783.45 | 392.23          | 766.42 | 383.71           | 7 |
| 4 | 398.24 | 199.62          | 381.21 | 191.11           | K    | 726.43 | 363.72          | 709.40 | 355.20           | 6 |
| 5 | 455.26 | 228.13          | 438.23 | 219.62           | G    | 556.32 | 278.66          | 539.29 | 270.15           | 5 |
| 6 | 512.28 | 256.64          | 495.26 | 248.13           | G    | 499.30 | 250.15          | 482.27 | 241.64           | 4 |
| 7 | 583.32 | 292.16          | 566.29 | 283.65           | A    | 442.28 | 221.64          | 425.25 | 213.13           | 3 |
| 8 | 779.44 | 390.22          | 762.41 | 381.71           | K    | 371.24 | 186.12          | 354.21 | 177.61           | 2 |
| 9 |        |                 |        |                  | R    | 175.12 | 88.06           | 158.09 | 79.55            | 1 |

**K<sub>cr</sub>ASGPPVSELITK**

**H1.2K33**

MS/MS Fragmentation of **KASGPPVSELITK**

Found in **IPI00223713**, Tax\_Id=10090 Gene\_Symbol=Hist1h1c Histone H1.2

Match to Query 16342: 1393.777254 from(697.895903,2+)

Click mouse within plot area to zoom in by factor of two about that point

Or, Plot from  to  Da

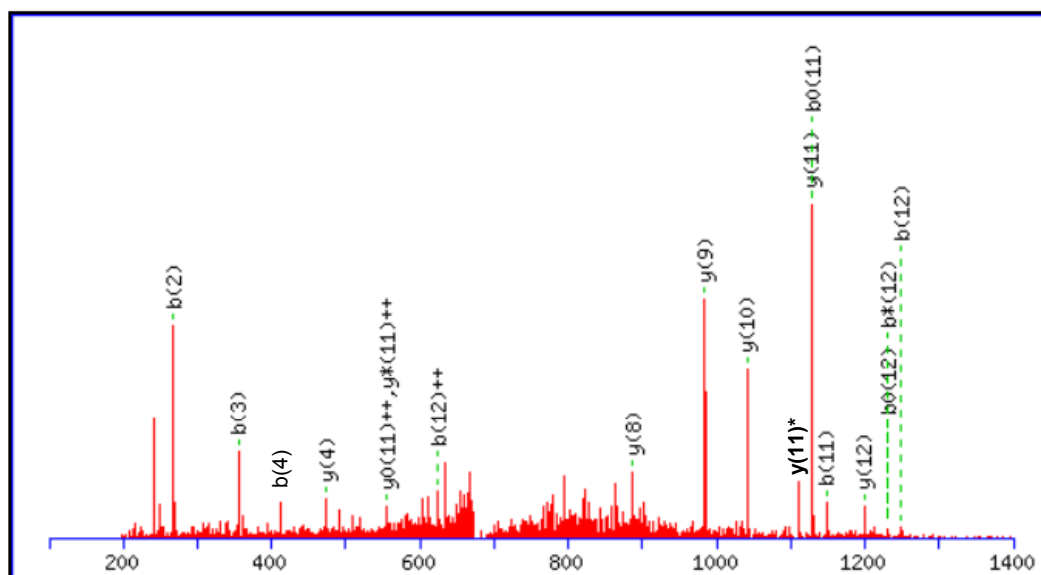

Monoisotopic mass of neutral peptide Mr(calc): 1393.78

Variable modifications:

K1 : Crotonoyl (K)

Ions Score: 44 Expect: 0.035

| #  | b       | b <sup>++</sup> | b <sup>*</sup> | b <sup>*++</sup> | b <sup>0</sup> | b <sup>0++</sup> | Seq. | y       | y <sup>++</sup> | y <sup>*</sup> | y <sup>*++</sup> | y <sup>0</sup> | y <sup>0++</sup> | #  |
|----|---------|-----------------|----------------|------------------|----------------|------------------|------|---------|-----------------|----------------|------------------|----------------|------------------|----|
| 1  | 197.13  | 99.07           | 180.10         | 90.55            |                |                  | K    |         |                 |                |                  |                |                  | 13 |
| 2  | 268.17  | 134.59          | 251.14         | 126.07           |                |                  | A    | 1198.67 | 599.84          | 1181.64        | 591.32           | 1180.66        | 590.83           | 12 |
| 3  | 355.20  | 178.10          | 338.17         | 169.59           | 337.19         | 169.10           | S    | 1127.63 | 564.32          | 1110.60        | 555.81           | 1109.62        | 555.31           | 11 |
| 4  | 412.22  | 206.61          | 395.19         | 198.10           | 394.21         | 197.61           | G    | 1040.60 | 520.80          | 1023.57        | 512.29           | 1022.59        | 511.80           | 10 |
| 5  | 509.27  | 255.14          | 492.25         | 246.63           | 491.26         | 246.13           | P    | 983.58  | 492.29          | 966.55         | 483.78           | 965.57         | 483.29           | 9  |
| 6  | 606.32  | 303.67          | 589.30         | 295.15           | 588.31         | 294.66           | P    | 886.52  | 443.77          | 869.50         | 435.25           | 868.51         | 434.76           | 8  |
| 7  | 705.39  | 353.20          | 688.37         | 344.69           | 687.38         | 344.19           | V    | 789.47  | 395.24          | 772.45         | 386.73           | 771.46         | 386.23           | 7  |
| 8  | 792.43  | 396.72          | 775.40         | 388.20           | 774.41         | 387.71           | S    | 690.40  | 345.71          | 673.38         | 337.19           | 672.39         | 336.70           | 6  |
| 9  | 921.47  | 461.24          | 904.44         | 452.72           | 903.46         | 452.23           | E    | 603.37  | 302.19          | 586.34         | 293.68           | 585.36         | 293.18           | 5  |
| 10 | 1034.55 | 517.78          | 1017.53        | 509.27           | 1016.54        | 508.77           | L    | 474.33  | 237.67          | 457.30         | 229.15           | 456.32         | 228.66           | 4  |
| 11 | 1147.64 | 574.32          | 1130.61        | 565.81           | 1129.63        | 565.32           | I    | 361.24  | 181.13          | 344.22         | 172.61           | 343.23         | 172.12           | 3  |
| 12 | 1248.68 | 624.85          | 1231.66        | 616.33           | 1230.67        | 615.84           | T    | 248.16  | 124.58          | 231.13         | 116.07           | 230.15         | 115.58           | 2  |
| 13 |         |                 |                |                  |                |                  | K    | 147.11  | 74.06           | 130.09         | 65.55            |                |                  | 1  |

K<sub>cr</sub>ALAAAGYDVEK

H1.2K63

MS/MS Fragmentation of **KALAAAGYDVEK**

Found in **IPI00223713**, Tax\_Id=10090 Gene\_Symbol=Hist1h1c Histone H1.2

Match to Query 18295: 1302.681434 from(652.347993,2+)

Click mouse within plot area to zoom in by factor of two about that point

Or,   to  Da

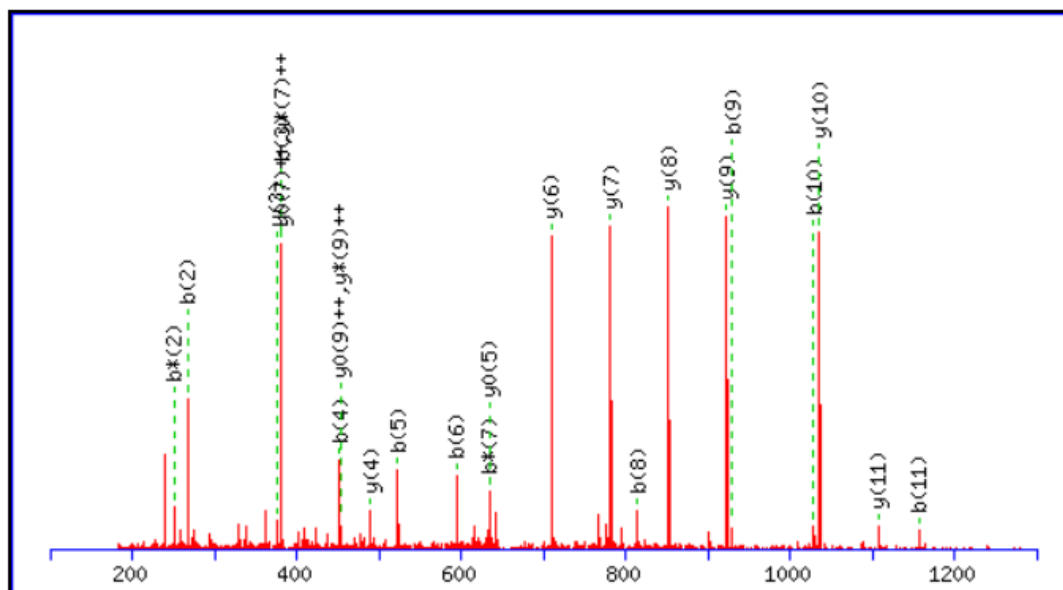

Monoisotopic mass of neutral peptide Mr(calc): 1302.68

Variable modifications:

K1 : Crotonoyl (K)

Ions Score: 57 Expect: 0.0042

| #  | b       | b <sup>++</sup> | b <sup>*</sup> | b <sup>*++</sup> | b <sup>0</sup> | b <sup>0++</sup> | Seq. | y       | y <sup>++</sup> | y <sup>*</sup> | y <sup>*++</sup> | y <sup>0</sup> | y <sup>0++</sup> | #  |
|----|---------|-----------------|----------------|------------------|----------------|------------------|------|---------|-----------------|----------------|------------------|----------------|------------------|----|
| 1  | 197.13  | 99.07           | 180.10         | 90.55            |                |                  | K    |         |                 |                |                  |                |                  | 12 |
| 2  | 268.17  | 134.59          | 251.14         | 126.07           |                |                  | A    | 1107.57 | 554.29          | 1090.54        | 545.77           | 1089.56        | 545.28           | 11 |
| 3  | 381.25  | 191.13          | 364.22         | 182.62           |                |                  | L    | 1036.53 | 518.77          | 1019.50        | 510.26           | 1018.52        | 509.76           | 10 |
| 4  | 452.29  | 226.65          | 435.26         | 218.13           |                |                  | A    | 923.45  | 462.23          | 906.42         | 453.71           | 905.44         | 453.22           | 9  |
| 5  | 523.32  | 262.17          | 506.30         | 253.65           |                |                  | A    | 852.41  | 426.71          | 835.38         | 418.20           | 834.40         | 417.70           | 8  |
| 6  | 594.36  | 297.68          | 577.33         | 289.17           |                |                  | A    | 781.37  | 391.19          | 764.35         | 382.68           | 763.36         | 382.18           | 7  |
| 7  | 651.38  | 326.19          | 634.36         | 317.68           |                |                  | G    | 710.34  | 355.67          | 693.31         | 347.16           | 692.32         | 346.67           | 6  |
| 8  | 814.45  | 407.73          | 797.42         | 399.21           |                |                  | Y    | 653.31  | 327.16          | 636.29         | 318.65           | 635.30         | 318.16           | 5  |
| 9  | 929.47  | 465.24          | 912.45         | 456.73           | 911.46         | 456.23           | D    | 490.25  | 245.63          | 473.22         | 237.12           | 472.24         | 236.62           | 4  |
| 10 | 1028.54 | 514.77          | 1011.51        | 506.26           | 1010.53        | 505.77           | V    | 375.22  | 188.12          | 358.20         | 179.60           | 357.21         | 179.11           | 3  |
| 11 | 1157.58 | 579.30          | 1140.56        | 570.78           | 1139.57        | 570.29           | E    | 276.16  | 138.58          | 259.13         | 130.07           | 258.14         | 129.58           | 2  |
| 12 |         |                 |                |                  |                |                  | K    | 147.11  | 74.06           | 130.09         | 65.55            |                |                  | 1  |

# H1.2K84

Found in **IPI00223713**, Tax Id=10090 Gene Symbol=Hist1h1c Histone H1.2

Click mouse within plot area to zoom in by factor of two about that point

Ions Score: 57 Expect: 0.0035

| # | b      | b <sup>++</sup> | b*     | b <sup>*++</sup> | b <sup>0</sup> | b <sup>0++</sup> | Seq. | y      | y <sup>++</sup> | y*     | y <sup>*++</sup> | y <sup>0</sup> | y <sup>0++</sup> | # |
|---|--------|-----------------|--------|------------------|----------------|------------------|------|--------|-----------------|--------|------------------|----------------|------------------|---|
| 1 | 114.09 | 57.55           |        |                  |                |                  | L    |        |                 |        |                  |                |                  | 9 |
| 2 | 171.11 | 86.06           |        |                  |                |                  | G    | 899.56 | 450.28          | 882.53 | 441.77           | 881.55         | 441.28           | 8 |
| 3 | 284.20 | 142.60          |        |                  |                |                  | L    | 842.53 | 421.77          | 825.51 | 413.26           | 824.52         | 412.77           | 7 |
| 4 | 480.32 | 240.66          | 463.29 | 232.15           |                |                  | K    | 729.45 | 365.23          | 712.42 | 356.72           | 711.44         | 356.22           | 6 |
| 5 | 567.35 | 284.18          | 550.32 | 275.67           | 549.34         | 275.17           | S    | 533.33 | 267.17          | 516.30 | 258.66           | 515.32         | 258.16           | 5 |
| 6 | 680.43 | 340.72          | 663.41 | 332.21           | 662.42         | 331.72           | L    | 446.30 | 223.65          | 429.27 | 215.14           | 428.29         | 214.65           | 4 |
| 7 | 779.50 | 390.25          | 762.48 | 381.74           | 761.49         | 381.25           | V    | 333.21 | 167.11          | 316.19 | 158.60           | 315.20         | 158.10           | 3 |
| 8 | 866.53 | 433.77          | 849.51 | 425.26           | 848.52         | 424.77           | S    | 234.14 | 117.58          | 217.12 | 109.06           | 216.13         | 108.57           | 2 |
| 9 |        |                 |        |                  |                |                  | K    | 147.11 | 74.06           | 130.09 | 65.55            |                |                  | 1 |

AK<sub>cr</sub>KPAAAAVTK

H1.2K158

MS/MS Fragmentation of **AKKPAAAAVTK**Found in **IPI00223713**, Tax\_Id=10090 Gene\_Symbol=Hist1h1c Histone H1.2

Match to Query 12894: 1122.677451 from(375.233093,3+)

Click mouse within plot area to zoom in by factor of two about that point

Or,   to  Da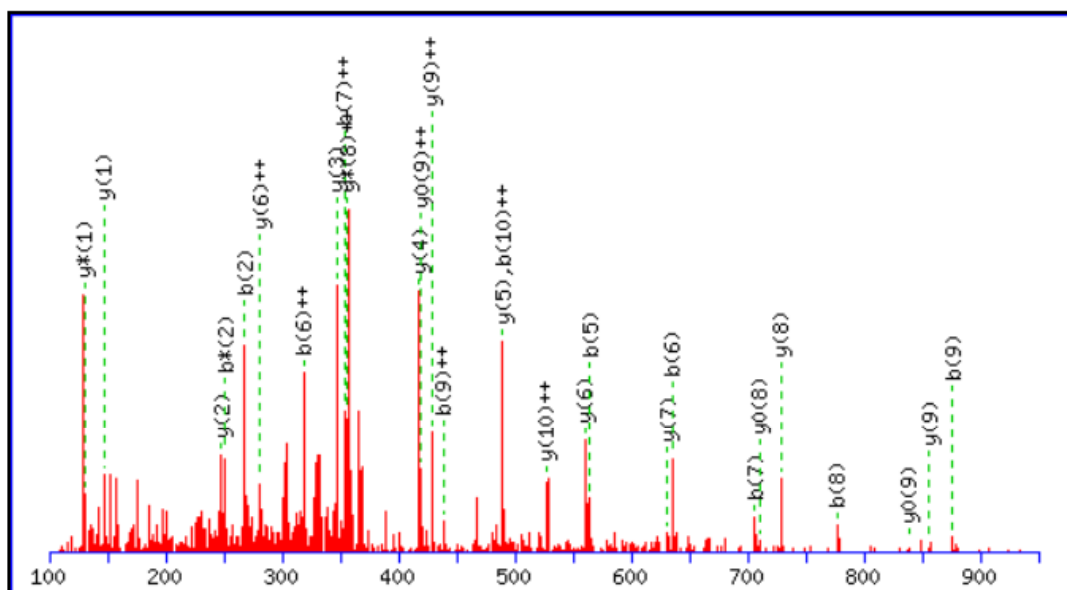

Monoisotopic mass of neutral peptide Mr(calc): 1122.68

Variable modifications:

K2 : Crotonoyl (K)

Ions Score: 54 Expect: 0.008

| #  | b      | b <sup>++</sup> | b <sup>*</sup> | b <sup>*++</sup> | b <sup>0</sup> | b <sup>0++</sup> | Seq. | y       | y <sup>++</sup> | y <sup>*</sup> | y <sup>*++</sup> | y <sup>0</sup> | y <sup>0++</sup> | #  |
|----|--------|-----------------|----------------|------------------|----------------|------------------|------|---------|-----------------|----------------|------------------|----------------|------------------|----|
| 1  | 72.04  | 36.53           |                |                  |                |                  | A    |         |                 |                |                  |                |                  | 11 |
| 2  | 268.17 | 134.59          | 251.14         | 126.07           |                |                  | K    | 1052.65 | 526.83          | 1035.62        | 518.31           | 1034.64        | 517.82           | 10 |
| 3  | 396.26 | 198.63          | 379.23         | 190.12           |                |                  | K    | 856.53  | 428.77          | 839.50         | 420.25           | 838.51         | 419.76           | 9  |
| 4  | 493.31 | 247.16          | 476.29         | 238.65           |                |                  | P    | 728.43  | 364.72          | 711.40         | 356.21           | 710.42         | 355.71           | 8  |
| 5  | 564.35 | 282.68          | 547.32         | 274.17           |                |                  | A    | 631.38  | 316.19          | 614.35         | 307.68           | 613.37         | 307.19           | 7  |
| 6  | 635.39 | 318.20          | 618.36         | 309.68           |                |                  | A    | 560.34  | 280.67          | 543.31         | 272.16           | 542.33         | 271.67           | 6  |
| 7  | 706.42 | 353.72          | 689.40         | 345.20           |                |                  | A    | 489.30  | 245.16          | 472.28         | 236.64           | 471.29         | 236.15           | 5  |
| 8  | 777.46 | 389.23          | 760.44         | 380.72           |                |                  | A    | 418.27  | 209.64          | 401.24         | 201.12           | 400.26         | 200.63           | 4  |
| 9  | 876.53 | 438.77          | 859.50         | 430.26           |                |                  | V    | 347.23  | 174.12          | 330.20         | 165.60           | 329.22         | 165.11           | 3  |
| 10 | 977.58 | 489.29          | 960.55         | 480.78           | 959.57         | 480.29           | T    | 248.16  | 124.58          | 231.13         | 116.07           | 230.15         | 115.58           | 2  |
| 11 |        |                 |                |                  |                |                  | K    | 147.11  | 74.06           | 130.09         | 65.55            |                |                  | 1  |

KPAAAVTK<sub>cr</sub>K

H1.2K167

MS/MS Fragmentation of KPAAAVTKK

Found in IPI00223713, Tax\_Id=10090 Gene\_Symbol=Hist1h1c Histone H1.2

Match to Query 7522: 1051.635904 from(526.825228,2+)

Click mouse within plot area to zoom in by factor of two about that point

Or, Plot from 900 to 910 Da

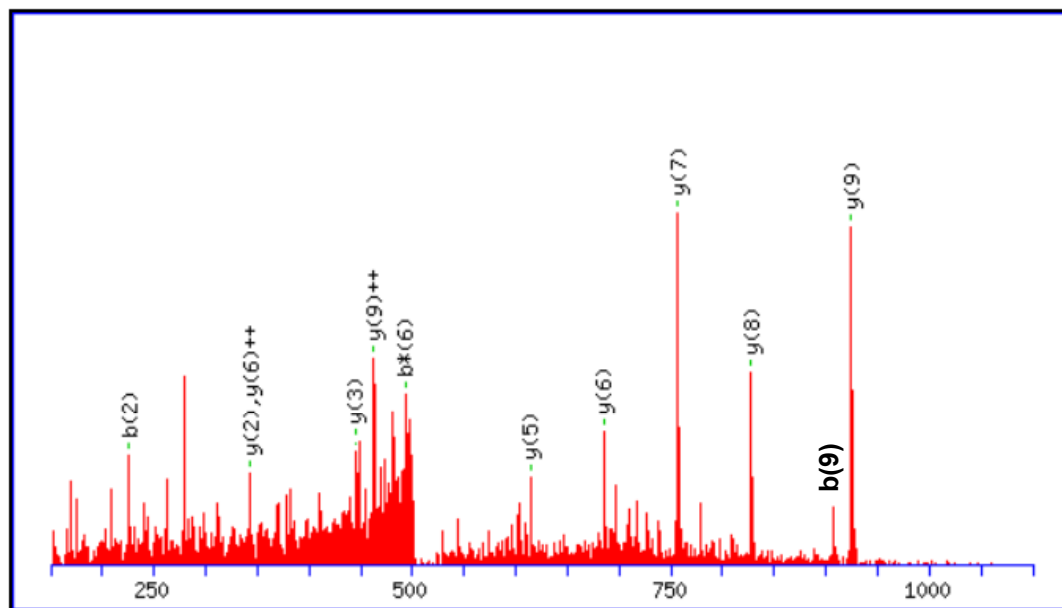

Monoisotopic mass of neutral peptide Mr(calc): 1051.64

Variable modifications:

K9 : Crotonoyl (K)

Ions Score: 42 Expect: 0.027

| #  | b      | b <sup>++</sup> | b*     | b <sup>++</sup> * | b <sup>0</sup> | b <sup>0++</sup> | Seq. | y      | y <sup>++</sup> | y*     | y <sup>++</sup> * | y <sup>0</sup> | y <sup>0++</sup> | #  |
|----|--------|-----------------|--------|-------------------|----------------|------------------|------|--------|-----------------|--------|-------------------|----------------|------------------|----|
| 1  | 129.10 | 65.05           | 112.08 | 56.54             |                |                  | K    |        |                 |        |                   |                |                  | 10 |
| 2  | 226.15 | 113.58          | 209.13 | 105.07            |                |                  | P    | 924.55 | 462.78          | 907.52 | 454.27            | 906.54         | 453.77           | 9  |
| 3  | 297.19 | 149.10          | 280.17 | 140.59            |                |                  | A    | 827.50 | 414.25          | 810.47 | 405.74            | 809.49         | 405.25           | 8  |
| 4  | 368.23 | 184.62          | 351.20 | 176.10            |                |                  | A    | 756.46 | 378.73          | 739.43 | 370.22            | 738.45         | 369.73           | 7  |
| 5  | 439.27 | 220.14          | 422.24 | 211.62            |                |                  | A    | 685.42 | 343.22          | 668.40 | 334.70            | 667.41         | 334.21           | 6  |
| 6  | 510.30 | 255.66          | 493.28 | 247.14            |                |                  | A    | 614.39 | 307.70          | 597.36 | 299.18            | 596.38         | 298.69           | 5  |
| 7  | 609.37 | 305.19          | 592.35 | 296.68            |                |                  | V    | 543.35 | 272.18          | 526.32 | 263.67            | 525.34         | 263.17           | 4  |
| 8  | 710.42 | 355.71          | 693.39 | 347.20            | 692.41         | 346.71           | T    | 444.28 | 222.64          | 427.26 | 214.13            | 426.27         | 213.64           | 3  |
| 9  | 906.51 | 419.76          | 821.49 | 411.25            | 820.50         | 410.76           | K    | 343.23 | 172.12          | 326.21 | 163.61            |                |                  | 2  |
| 10 |        |                 |        |                   |                |                  | K    | 215.14 | 108.07          | 198.11 | 99.56             |                |                  | 1  |

GK<sub>ac</sub>QGGK<sub>pr</sub>AR

H2AK5

R.LGK(14)DGGKARA (+2) - Mod : 0.04 at 0(-1) - Retention time : 14.08 min - Precursor m/z : 450.26 - Precursor int. : 965464.000 - Basepeak int. : 277944.000

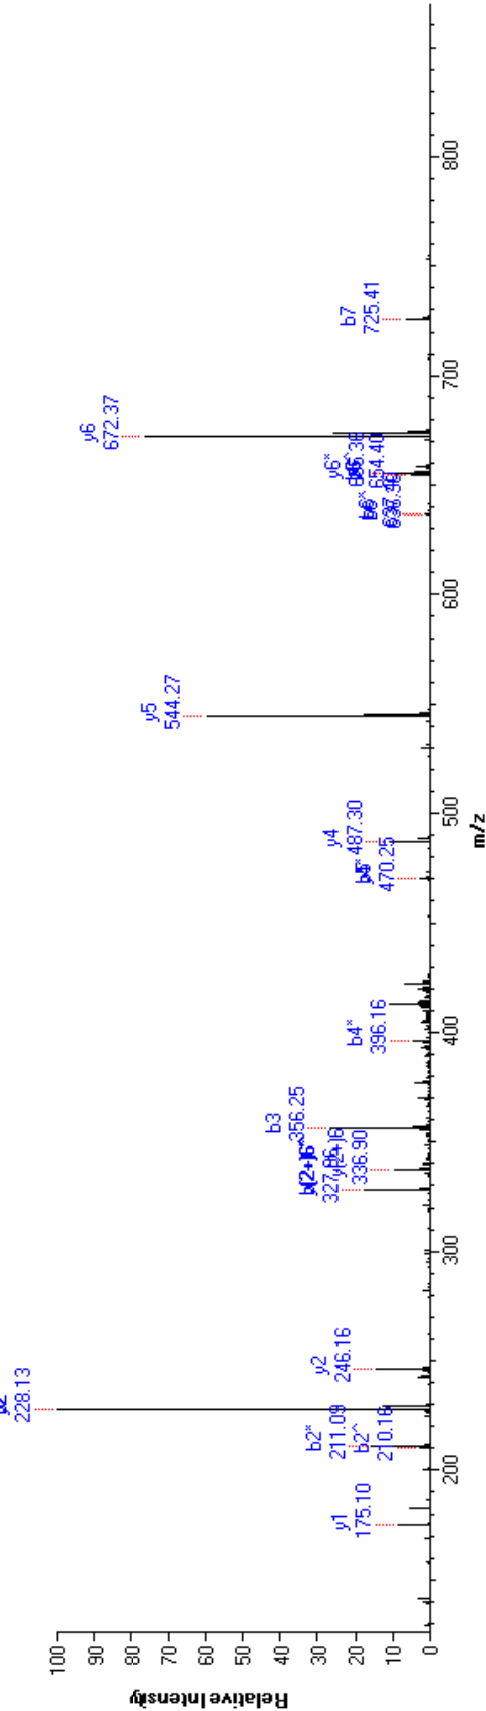

| (b) Seq (y) | b           | b <sup>+</sup> | y           | y <sup>+</sup> | y <sup>+</sup> | b(2+) <sup>+</sup> | b(2+) <sup>+</sup> | y(2+) <sup>+</sup> | y(2+) <sup>+</sup> |
|-------------|-------------|----------------|-------------|----------------|----------------|--------------------|--------------------|--------------------|--------------------|
| 1 G 8       | 58.0293     | 41.0027        | 899.4695    | 882.4429       | 881.4589       | 0.0000             | 0.0000             | 450.2386           | 441.7254           |
| 2 K 7       | 228.1242 ** | 211.0977 **    | 842.4480    | 825.4215       | 824.4374       | 0.0000             | 0.0000             | 421.7279           | 413.2147           |
| 3 Q 6       | 356.1828 ** | 339.1563       | 672.3531 ** | 655.3265 **    | 654.3425 **    | 0.0000             | 0.0000             | 336.6805 **        | 327.6752 **        |
| 4 G 5       | 413.2043    | 396.1777 **    | 544.2945 ** | 527.2679       | 526.2839       | 0.0000             | 0.0000             | 0.0000             | 0.0000             |
| 5 G 4       | 470.2257 ** | 453.1992       | 487.2730 ** | 470.2465 **    | 469.2625       | 0.0000             | 0.0000             | 0.0000             | 0.0000             |
| 6 K 3       | 654.3207 ** | 637.2942 **    | 430.2516    | 413.2250       | 412.2410       | 327.6643 **        | 319.1510           | 0.0000             | 0.0000             |
| 7 A 2       | 725.3578 ** | 708.3313       | 246.1566 ** | 229.1301       | 228.1460 **    | 363.1828           | 354.6696           | 0.0000             | 0.0000             |
| 8 R 1       | 881.4589    | 864.4324       | 175.1195 ** | 158.0930       | 157.1089       | 441.2334           | 432.2281           | 0.0000             | 0.0000             |

pr-GK<sub>ac</sub>QGKG<sub>pm</sub> H2AK5, K9

MS/MS Fragmentation of **GKQGKG**  
Found in **gi|10645195**, H2A histone family, member A [Homo sapiens]  
Match to Query 6709: 741.401114 from(742.408390,1+)  
From data file HistoneOffgfr2\_3.dta

Click mouse within plot area to zoom in by factor of two about that point  
Or, Plot from  to  Da

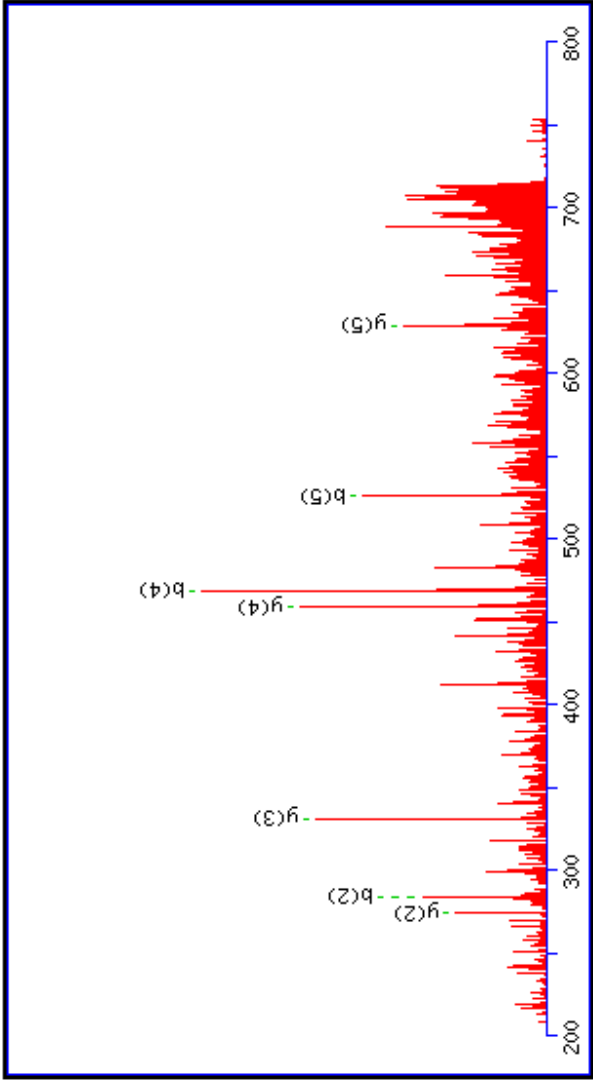

**Monoisotopic mass of neutral peptide Mr(calc): 741.40**  
**Fixed modifications:** Propionyl (N-term)  
**Variable modifications:**  
K2 : Acetyl (K)  
K6 : PropionylMethyl (K)  
**Ions Score:** 26 **Expect:** 0.18  
**Matches (Bold Red):** 7/19 fragment ions using 17 most intense peaks

| #        | b             | b*     | Seq.     | y             | y*     | #        |
|----------|---------------|--------|----------|---------------|--------|----------|
| <b>1</b> | 114.05        |        | <b>G</b> |               |        | <b>6</b> |
| <b>2</b> | <b>284.16</b> | 267.13 | <b>K</b> | <b>629.36</b> | 612.34 | <b>5</b> |
| <b>3</b> | 412.22        | 395.19 | <b>Q</b> | <b>459.26</b> | 442.23 | <b>4</b> |
| <b>4</b> | <b>469.24</b> | 452.21 | <b>G</b> | <b>331.20</b> | 314.17 | <b>3</b> |
| <b>5</b> | <b>526.26</b> | 509.24 | <b>G</b> | <b>274.18</b> | 257.15 | <b>2</b> |
| <b>6</b> |               |        | <b>K</b> | 217.15        | 200.13 | <b>1</b> |

**K<sub>pr</sub>GNY<sub>oh</sub>SER**

**H2AY39**

R.KGNYSER.V (+2) - Mod : 16.00 at Y(4) - Retention time : 17.03 min - Precursor m/z : 463.22 - Precursor int. : 149088.000 - Basepeak int. : 32287.000

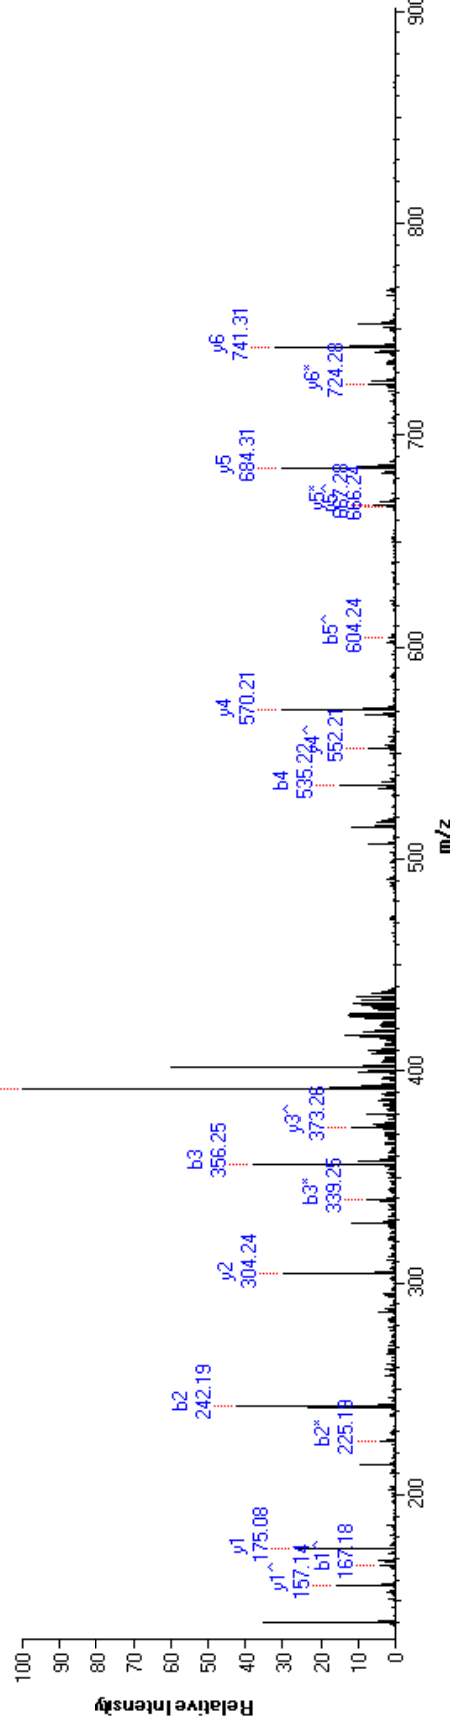

| (b) Seq (y) | b        | b <sup>+</sup> | y        | y <sup>+</sup> | y <sup>+</sup> | b(2+)    | b(2+) <sup>+</sup> | y(2+)    | y(2+) <sup>+</sup> |
|-------------|----------|----------------|----------|----------------|----------------|----------|--------------------|----------|--------------------|
| 1 K 7       | 185.1028 | 168.0762       | 925.4168 | 908.3903       | 907.4063       | 0.0000   | 0.0000             | 463.2123 | 454.6990           |
| 2 G 6       | 242.1242 | 225.0977       | 741.3218 | 724.2953       | 723.3113       | 0.0000   | 0.0000             | 371.1548 | 362.1595           |
| 3 N 5       | 356.1672 | 339.1406       | 684.3004 | 667.2739       | 666.2898       | 0.0000   | 0.0000             | 342.6541 | 333.6488           |
| 4 Y 4       | 535.2305 | 518.2040       | 570.2574 | 553.2309       | 552.2469       | 0.0000   | 0.0000             | 0.0000   | 0.0000             |
| 5 S 3       | 622.2625 | 605.2360       | 391.1941 | 374.1676       | 373.1836       | 311.6352 | 0.0000             | 0.0000   | 0.0000             |
| 6 E 2       | 751.3051 | 734.2786       | 304.1621 | 287.1356       | 286.1515       | 376.1565 | 367.6432           | 0.0000   | 0.0000             |
| 7 R 1       | 907.4063 | 890.3797       | 175.1195 | 158.0930       | 157.1089       | 454.2070 | 445.6938           | 0.0000   | 0.0000             |

pr-KGNYSER<sub>me1</sub>

H2AR42

MS/MS Fragmentation of **KGNYSER**

Found in **gi|10645195**, H2A histone family, member A [Homo sapiens]

Match to Query 12917: 922.453164 from(462.233858,2+)

From data file HistoneOffgelfr10\_12.dta

Click mouse within plot area to zoom in by factor of two about that point

Or, Plot from  to  Da

| # | b             | b <sup>++</sup> | b <sup>*</sup> | b <sup>++</sup> | b <sup>0</sup> | b <sup>0++</sup> | Seq. | y             | y <sup>++</sup> | y <sup>*</sup> | y <sup>++</sup> | y <sup>0</sup> | y <sup>0++</sup> | # |
|---|---------------|-----------------|----------------|-----------------|----------------|------------------|------|---------------|-----------------|----------------|-----------------|----------------|------------------|---|
| 1 | 185.13        | 93.07           | 168.10         | 84.55           |                |                  | K    |               |                 |                |                 |                |                  | 7 |
| 2 | <b>242.15</b> | 121.58          | 225.12         | 113.07          |                |                  | G    | <b>739.34</b> | 370.17          | <b>722.31</b>  | 361.66          | 721.33         | 361.17           | 6 |
| 3 | <b>356.19</b> | 178.60          | 339.17         | 170.09          |                |                  | N    | <b>682.32</b> | 341.66          | 665.29         | 333.15          | 664.30         | 332.66           | 5 |
| 4 | <b>519.26</b> | 260.13          | <b>502.23</b>  | 251.62          |                |                  | Y    | <b>568.27</b> | 284.64          | 551.25         | 276.13          | 550.26         | 275.63           | 4 |
| 5 | 606.29        | 303.65          | 589.26         | 295.13          | 588.28         | 294.64           | S    | <b>405.21</b> | 203.11          | 388.18         | 194.59          | 387.20         | 194.10           | 3 |
| 6 | 735.33        | 368.17          | 718.30         | 359.66          | 717.32         | 359.16           | E    | <b>318.18</b> | 159.59          | 301.15         | 151.08          | 300.17         | 150.59           | 2 |
| 7 |               |                 |                |                 |                |                  | R    | <b>189.13</b> | 95.07           | 172.11         | 86.56           |                |                  | 1 |

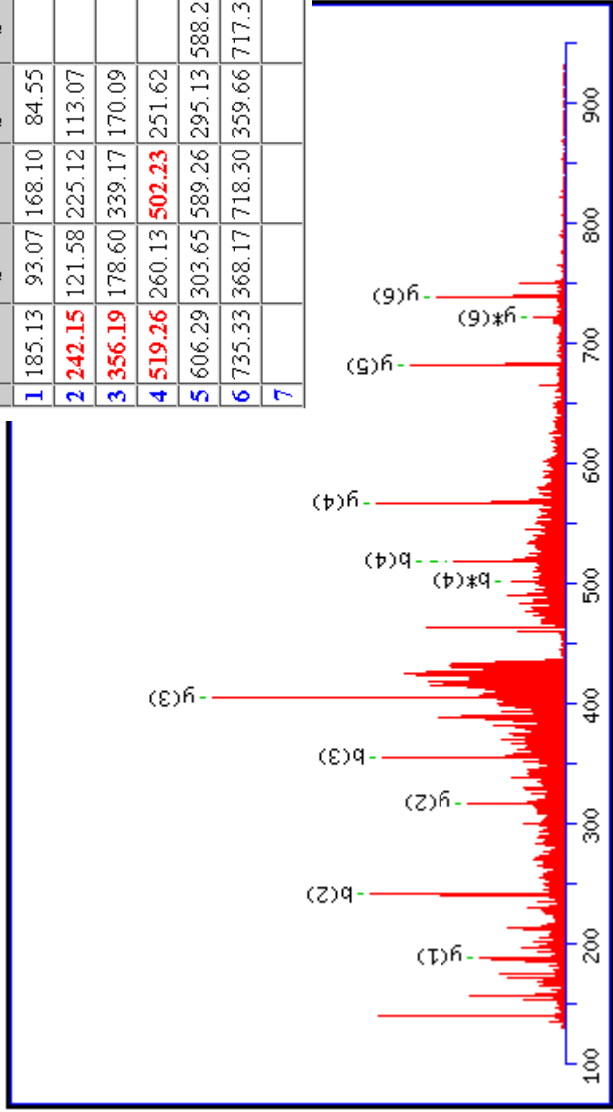

**Monoisotopic mass of neutral peptide Mr(calc): 922.45**  
**Fixed modifications:** Propionyl (N-term)  
**Variable modifications:**  
R7 : Methyl (R)  
**Ions Score:** 31 **Expect:** 0.021  
**Matches (**Bold Red**):** 11/62 fragment ions using 54 most intense peaks

pr-GNYSER<sub>me1</sub>

H2AR42

K.GNYSER.V (+1) - Mod : 14.00 at R(6) - Retention time : 45.34 min - Precursor m/z : 795.36 - Precursor int. : 398651.000 - Basepeak int. : 9182.940

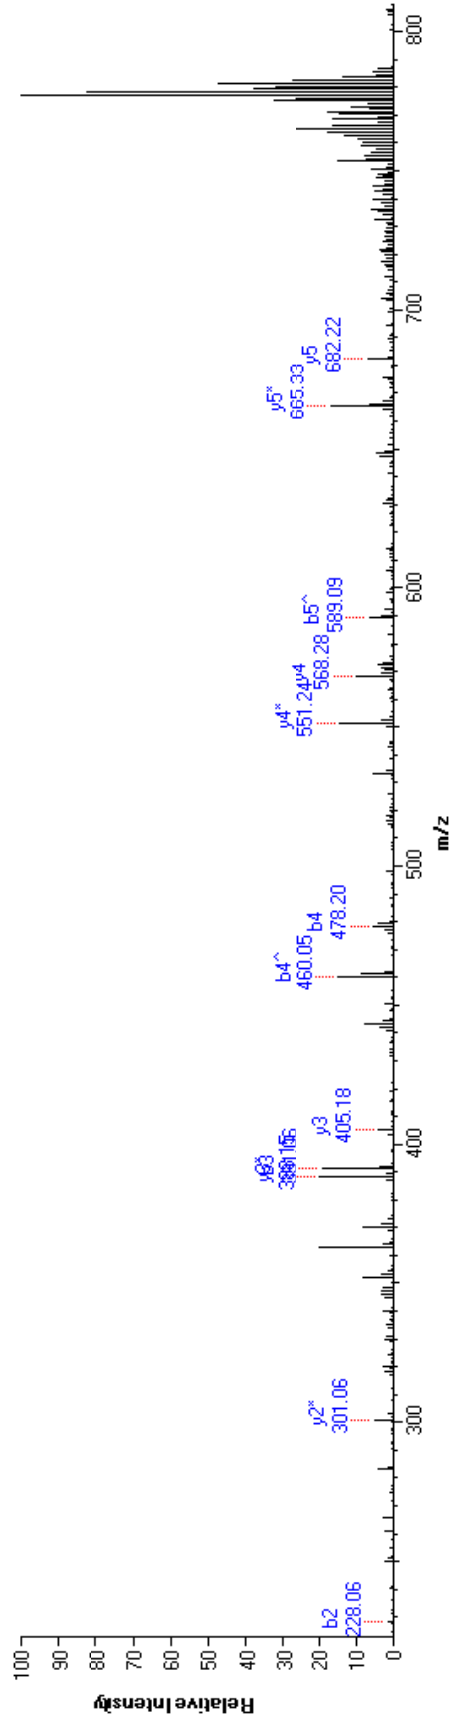

| (b) Seq (y) | b           | b*       | b^          | y           | y*          | y^       |
|-------------|-------------|----------|-------------|-------------|-------------|----------|
| 1 G 6       | 114.0293    | 97.0027  | 96.0187     | 739.3218    | 722.2953    | 721.3113 |
| 2 N 5       | 228.0722 ** | 211.0457 | 210.0617    | 682.3004 ** | 665.2739 ** | 664.2898 |
| 3 Y 4       | 391.1356 ** | 374.1090 | 373.1250    | 568.2574 ** | 551.2309 ** | 550.2469 |
| 4 S 3       | 478.1676 ** | 461.1410 | 460.1570 ** | 405.1941 ** | 388.1676 ** | 387.1836 |
| 5 E 2       | 607.2101    | 590.1837 | 589.1996 ** | 318.1621    | 301.1356 ** | 300.1515 |
| 6 R 1       | 777.3113    | 760.2847 | 759.3007    | 189.1195    | 172.0930    | 171.1089 |
|             | ...         | ...      | ...         | ...         | ...         | ...      |

pr-HLQLAIR<sub>me1</sub>

H2AR88

R.HLQLAIR.N (+2) - Mod.: 14.00 at R(7) - Retention time : 50.76 min - Precursor m/z : 460.79 - Precursor int. : 407717.000 - Basepeak int. : 182220.000

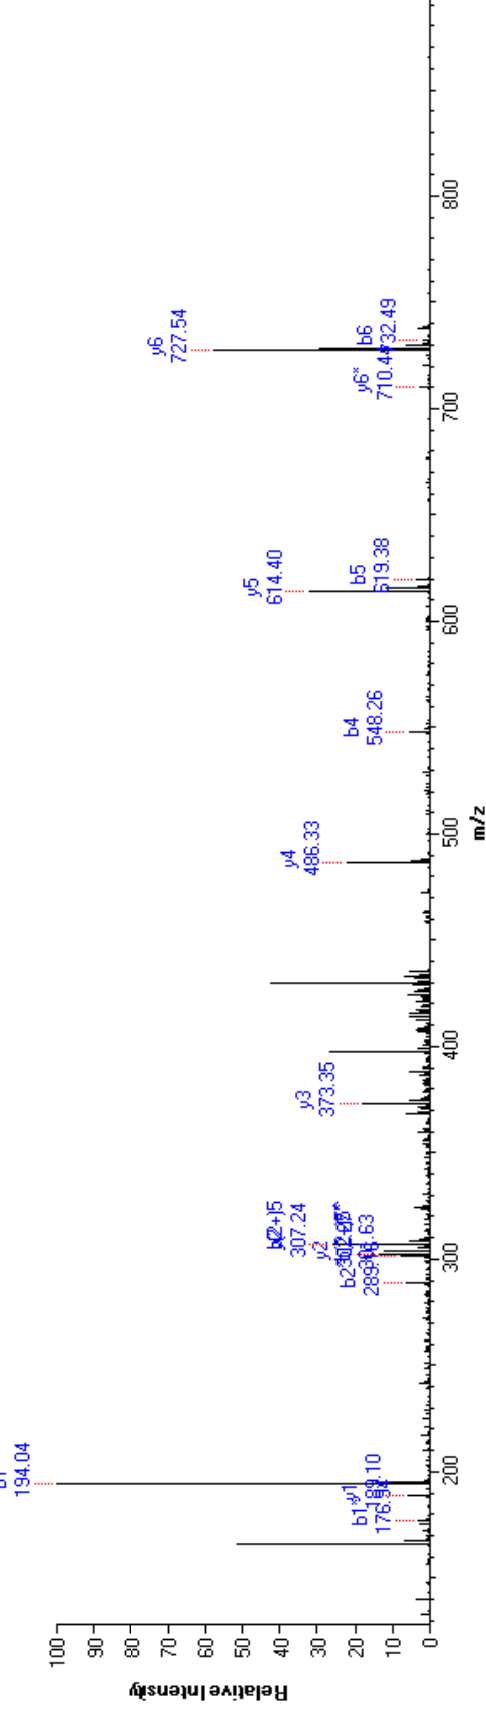

| (b) Seq (y) | b           | b*          | b <sup>+</sup> | y           | y*          | y <sup>+</sup> | b(2+)    | b(2+)*      | b(2+) <sup>+</sup> | y(2+)       | y(2+)*   | y(2+) <sup>+</sup> |
|-------------|-------------|-------------|----------------|-------------|-------------|----------------|----------|-------------|--------------------|-------------|----------|--------------------|
| 1 H 7       | 194.0667 ** | 177.0402 ** | 176.0562       | 864.5262    | 847.4998    | 846.5157       | 0.0000   | 0.0000      | 0.0000             | 432.7671    | 424.2538 | 423.7618           |
| 2 L 6       | 307.1508 ** | 290.1243    | 289.1402 **    | 727.4673 ** | 710.4408 ** | 709.4568       | 0.0000   | 0.0000      | 0.0000             | 364.2376    | 355.7243 | 355.2323           |
| 3 Q 5       | 435.2094    | 418.1828    | 417.1988       | 614.3833 ** | 597.3568    | 596.3727       | 0.0000   | 0.0000      | 0.0000             | 307.6956 ** | 0.0000   | 0.0000             |
| 4 L 4       | 548.2935 ** | 531.2669    | 530.2829       | 486.3247 ** | 469.2982    | 468.3142       | 0.0000   | 0.0000      | 0.0000             | 0.0000      | 0.0000   | 0.0000             |
| 5 A 3       | 619.3306 ** | 602.3040    | 601.3200       | 373.2407 ** | 356.2141    | 355.2301       | 0.0000   | 301.6559 ** | 301.1639 **        | 0.0000      | 0.0000   | 0.0000             |
| 6 I 2       | 732.4146 ** | 715.3881    | 714.4041       | 302.2036 ** | 285.1770    | 284.1930       | 366.7112 | 358.1979    | 357.7059           | 0.0000      | 0.0000   | 0.0000             |
| 7 R 1       | 902.5157    | 885.4892    | 884.5051       | 189.1195 ** | 172.0930    | 171.1089       | 451.7618 | 443.2485    | 442.7565           | 0.0000      | 0.0000   | 0.0000             |

pr-VTIAQGGVLPNIQAVLLPK<sub>pm</sub> H2AK118

R.VTIAQGGVLPNIQAVLLPK(+70).K (+2) - Mod : 0.07 at 0(-1) - Retention time : 76.16 min - Precursor m/z : 1029.12 - Precursor int. : 1297700.000 - Basepeak int. : 74401.700

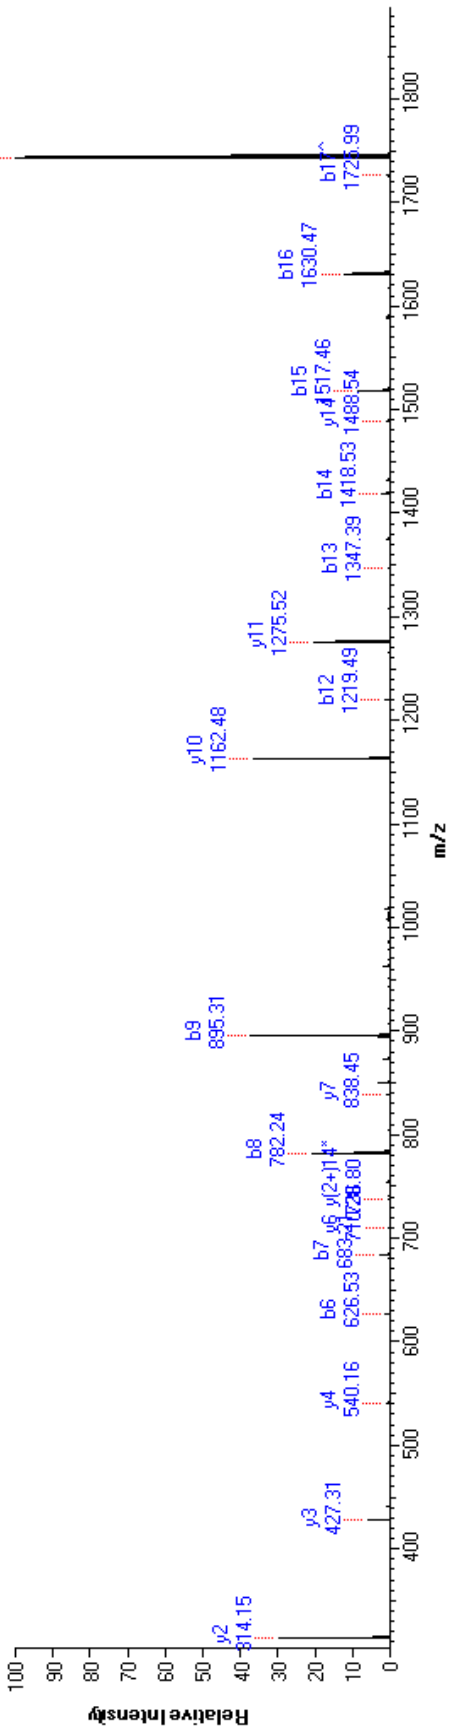

| (b) Seq (y) | b         | b <sup>+</sup> | y         | y <sup>+</sup> | b(2+)     | b(2+) <sup>+</sup> | y(2+)     | y(2+) <sup>+</sup> |
|-------------|-----------|----------------|-----------|----------------|-----------|--------------------|-----------|--------------------|
| 1 V 19      | 156.0762  | 139.0497       | 2001.1693 | 1984.1428      | 1983.1587 | 0.0000             | 1001.0886 | 992.5753           |
| 2 T 18      | 257.1239  | 240.0974       | 1902.1010 | 1885.0743      | 1884.0903 | 0.0000             | 951.5544  | 943.0411           |
| 3 I 17      | 370.2080  | 353.1814       | 1801.0532 | 1784.0267      | 1783.0426 | 0.0000             | 901.0305  | 892.5173           |
| 4 A 16      | 441.2451  | 424.2185       | 1687.9691 | 1670.9426      | 1669.9586 | 0.0000             | 844.4885  | 835.9752           |
| 5 Q 15      | 569.3036  | 552.2771       | 1616.9320 | 1599.9055      | 1598.9215 | 0.0000             | 808.9699  | 800.4567           |
| 6 G 14      | 626.3251  | 609.2986       | 1488.8734 | 1471.8469      | 1470.8629 | 0.0000             | 744.9407  | 736.4274           |
| 7 G 13      | 683.3466  | 666.3201       | 1431.8521 | 1414.8254      | 1413.8414 | 0.0000             | 716.4299  | 707.9166           |
| 8 V 12      | 782.4150  | 765.3884       | 1374.8306 | 1357.8040      | 1356.8199 | 0.0000             | 687.9192  | 679.4059           |
| 9 L 11      | 895.4991  | 878.4725       | 1275.7621 | 1258.7356      | 1257.7516 | 0.0000             | 638.3850  | 629.8717           |
| 10 P 10     | 992.5518  | 975.5253       | 1162.6781 | 1145.6515      | 1144.6675 | 0.0000             | 581.8430  | 573.3297           |
| 11 N 9      | 1106.5947 | 1089.5682      | 1065.6254 | 1048.5988      | 1047.6147 | 0.0000             | 533.3166  | 524.8033           |
| 12 I 8      | 1219.6788 | 1202.6522      | 951.5824  | 934.5558       | 933.5718  | 0.0000             | 476.2951  | 467.7818           |
| 13 Q 7      | 1347.7374 | 1330.7108      | 838.4984  | 821.4718       | 820.4878  | 0.0000             | 419.7531  | 411.2398           |
| 14 A 6      | 1418.7745 | 1401.7479      | 710.4398  | 693.4132       | 692.4292  | 0.0000             | 355.7238  | 347.2105           |
| 15 V 5      | 1517.8429 | 1500.8164      | 639.4026  | 622.3761       | 621.3921  | 0.0000             | 320.2052  | 311.6920           |
| 16 L 4      | 1630.9270 | 1613.9004      | 540.3342  | 523.3077       | 522.3237  | 0.0000             | 0.0000    | 0.0000             |
| 17 L 3      | 1744.0110 | 1726.9845      | 427.2502  | 410.2236       | 409.2396  | 0.0000             | 0.0000    | 0.0000             |
| 18 P 2      | 1841.0638 | 1824.0372      | 314.1661  | 297.1396       | 296.1555  | 0.0000             | 0.0000    | 0.0000             |
| 19 K 1      | 2039.1587 | 2022.1322      | 217.1133  | 200.0868       | 199.1028  | 1011.5700          | 0.0000    | 0.0000             |

# VTIAQGGVLPNIQAVLLPK<sub>fo</sub>

# H2AK118

MS/MS Fragmentation of **VTIAQGGVLPNIQAVLLPKK**

Found in **gi|10645195**, H2A histone family, member A [Homo sapiens]

Match to Query 33262: 2086.246494 from(1044.130523,2+)

From data file HelaHistoneH2A2B.dta

Click mouse within plot area to zoom in by factor of two about that point  
Or, Plot from  to  Da

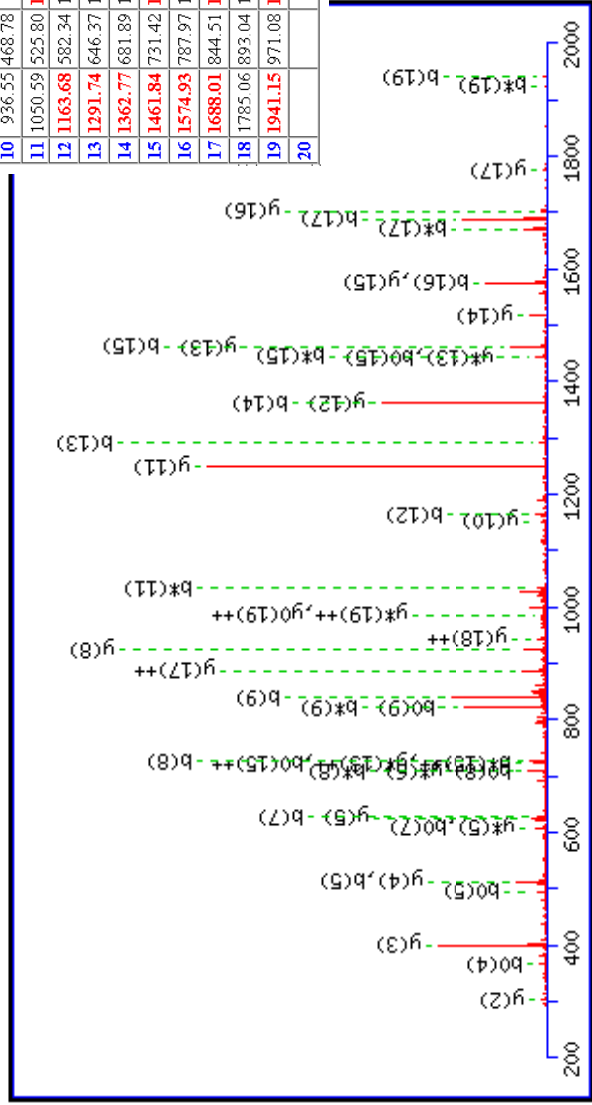

pr-K<sub>pr</sub>TESHHK<sub>pm</sub>

H2AK125

K.K(+56)TESHHK.A (+2) - Mod : 70.00 at K(7) - Retention time : 45.08 min - Precursor m/z : 524.77 - Precursor int. : 180.7270.000 - Basepeak int. : 48099.000

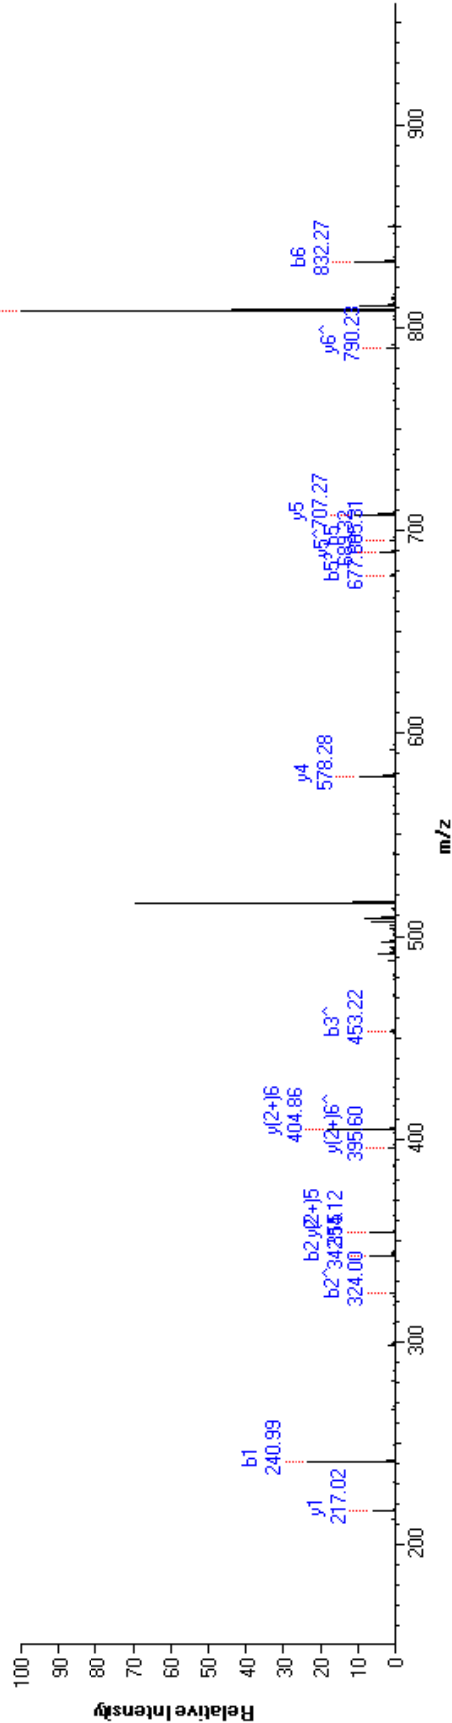

| [b] Seq (y) | b           | b <sup>+</sup> | b <sup>~</sup> | y           | y <sup>+</sup> | y <sup>~</sup> | b(2+)    | b(2+) <sup>+</sup> | y(2+)       | y(2+) <sup>+</sup> | y(2+) <sup>~</sup> |
|-------------|-------------|----------------|----------------|-------------|----------------|----------------|----------|--------------------|-------------|--------------------|--------------------|
| 1 K 7       | 241.1028 ** | 224.0762       | 223.0922       | 992.4484    | 975.4219       | 974.4379       | 0.0000   | 0.0000             | 496.7281    | 488.2148           | 487.7228           |
| 2 T 6       | 342.1505 ** | 325.1239       | 324.1399 **    | 808.3535 ** | 791.3269       | 790.3429 **    | 0.0000   | 0.0000             | 404.6806 ** | 396.1674           | 395.6754 **        |
| 3 E 5       | 471.1931    | 454.1685       | 453.1825 **    | 707.3058 ** | 690.2792       | 689.2952 **    | 0.0000   | 0.0000             | 354.1568 ** | 345.6435           | 345.1515           |
| 4 S 4       | 558.2251    | 541.1985       | 540.2145       | 578.2632 ** | 561.2366       | 560.2526       | 0.0000   | 0.0000             | 0.0000      | 0.0000             | 0.0000             |
| 5 H 3       | 695.2840 ** | 678.2574       | 677.2734 **    | 491.2312    | 474.2046       | 473.2206       | 348.1459 | 339.6326           | 0.0000      | 0.0000             | 0.0000             |
| 6 H 2       | 832.3429 ** | 815.3163       | 814.3323       | 354.1722 ** | 337.1457       | 336.1617       | 416.6754 | 408.1621           | 0.0000      | 0.0000             | 0.0000             |
| 7 K 1       | 1030.4379   | 1013.4113      | 1012.4273      | 217.1133 ** | 200.0868       | 199.1028       | 515.7228 | 507.2096           | 0.0000      | 0.0000             | 0.0000             |

pr-**TESH**HK<sub>pm</sub>

H2AK125

K.TESHKA (+2) - Mod : 70.00 at K(6) - Retention time : 41.57 min - Precursor m/z : 432.71 - Basepeak int. : 6400.720

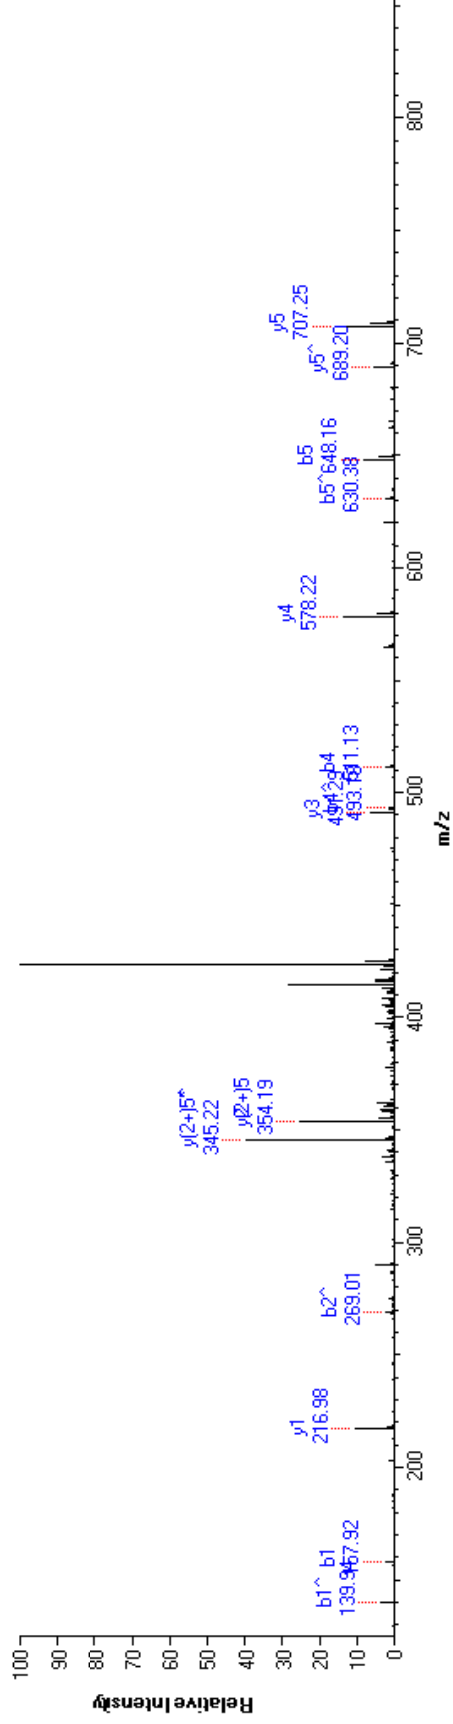

| (b) Seq (y) | b           | b <sup>+</sup> | b <sup>-</sup> | y           | y <sup>+</sup> | y <sup>-</sup> | b(2+) <sup>+</sup> | b(2+) <sup>-</sup> | y(2+) <sup>+</sup> | y(2+) <sup>-</sup> |
|-------------|-------------|----------------|----------------|-------------|----------------|----------------|--------------------|--------------------|--------------------|--------------------|
| 1 T 6       | 158.0555 ** | 141.0290       | 140.0449 **    | 808.3535    | 791.3269       | 790.3429       | 0.0000             | 0.0000             | 404.6806           | 395.6754           |
| 2 E 5       | 287.0981    | 270.0716       | 269.0875 **    | 707.3058 ** | 690.2792       | 689.2952 **    | 0.0000             | 0.0000             | 354.1568 **        | 345.1515 **        |
| 3 S 4       | 374.1301    | 357.1036       | 356.1196       | 578.2632 ** | 561.2366       | 560.2526       | 0.0000             | 0.0000             | 0.0000             | 0.0000             |
| 4 H 3       | 511.1890 ** | 494.1625       | 493.1785 **    | 491.2312 ** | 474.2046       | 473.2206       | 0.0000             | 0.0000             | 0.0000             | 0.0000             |
| 5 H 2       | 648.2479 ** | 631.2214       | 630.2374 **    | 354.1722 ** | 337.1457       | 336.1617       | 324.6279           | 316.1146           | 0.0000             | 0.0000             |
| 6 K 1       | 846.3429    | 829.3163       | 828.3323       | 217.1133 ** | 200.0868       | 199.1028       | 423.6754           | 415.1621           | 0.0000             | 0.0000             |

# PEPAK<sub>f0</sub>SAPAPK

# H2BK5

MS/MS Fragmentation of **PEPAKSAPAPK**

Found in **gi|1568551**, histone H2B [Homo sapiens]

Match to Query 13429: 1119.591834 from(560.803193,2+)

From data file HelaHistoneH2A2B.dta

Click mouse within plot area to zoom in by factor of two about that poi  
Or, Plot from  to  Da

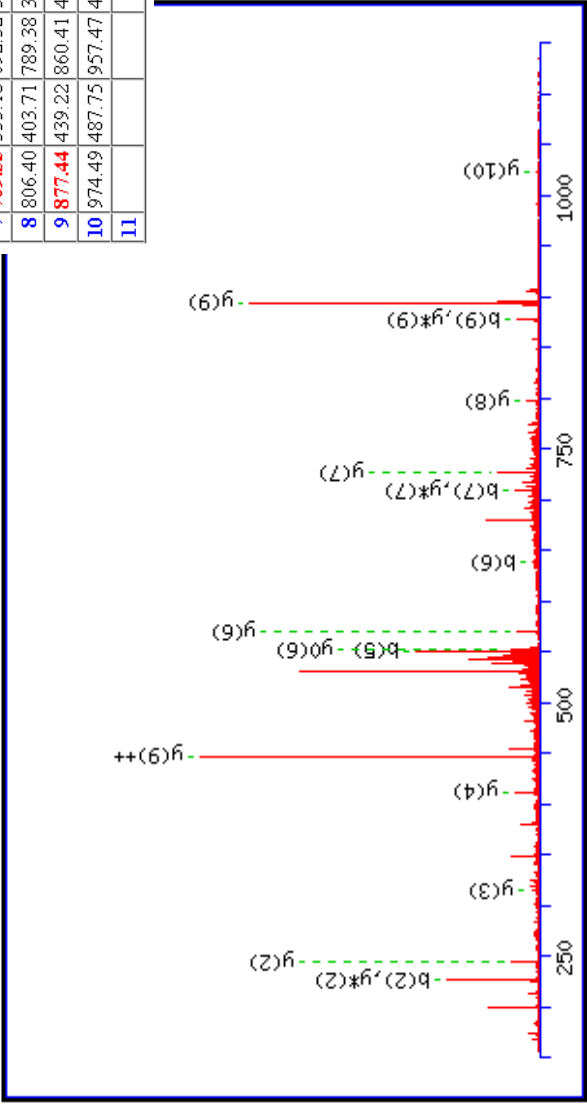

Monoisotopic mass of neutral peptide Mr(calc): 1119.59

Variable modifications:

K5 : Formyl (K)

Ions Score: 40 Expect: 0.014

Matches (**Bold Red**): 18/100 fragment ions using 58 most intense peaks

| #         | b             | b <sup>++</sup> | b <sup>*</sup> | b <sup>++</sup> | b <sup>0</sup> | b <sup>0++</sup> | Seq.     | y              | y <sup>++</sup> | y <sup>*</sup> | y <sup>++</sup> | y <sup>0</sup> | y <sup>0++</sup> | #         |
|-----------|---------------|-----------------|----------------|-----------------|----------------|------------------|----------|----------------|-----------------|----------------|-----------------|----------------|------------------|-----------|
| <b>1</b>  | 98.06         | 49.53           |                |                 |                |                  | <b>P</b> |                |                 |                |                 |                |                  | <b>11</b> |
| <b>2</b>  | <b>227.10</b> | 114.05          |                |                 | 209.09         | 105.05           | <b>E</b> | <b>1023.55</b> | 512.28          | 1006.52        | 503.76          | 1005.54        | 503.27           | <b>10</b> |
| <b>3</b>  | 324.16        | 162.58          |                |                 | 306.14         | 153.58           | <b>P</b> | <b>894.50</b>  | <b>447.76</b>   | <b>877.48</b>  | 439.24          | 876.49         | 438.75           | <b>9</b>  |
| <b>4</b>  | 395.19        | 198.10          |                |                 | 377.18         | 189.09           | <b>A</b> | <b>797.45</b>  | 399.23          | 780.43         | 390.72          | 779.44         | 390.22           | <b>8</b>  |
| <b>5</b>  | <b>551.28</b> | 276.14          | 534.26         | 267.63          | 533.27         | 267.14           | <b>K</b> | <b>726.41</b>  | 363.71          | <b>709.39</b>  | 355.20          | 708.40         | 354.71           | <b>7</b>  |
| <b>6</b>  | <b>638.31</b> | 319.66          | 621.29         | 311.15          | 620.30         | 310.66           | <b>S</b> | <b>570.32</b>  | 285.67          | 553.30         | 277.15          | <b>552.31</b>  | 276.66           | <b>6</b>  |
| <b>7</b>  | <b>709.35</b> | 355.18          | 692.32         | 346.67          | 691.34         | 346.17           | <b>A</b> | 483.29         | 242.15          | 466.27         | 233.64          |                |                  | <b>5</b>  |
| <b>8</b>  | 806.40        | 403.71          | 789.38         | 395.19          | 788.39         | 394.70           | <b>P</b> | <b>412.26</b>  | 206.63          | 395.23         | 198.12          |                |                  | <b>4</b>  |
| <b>9</b>  | <b>877.44</b> | 439.22          | 860.41         | 430.71          | 859.43         | 430.22           | <b>A</b> | <b>315.20</b>  | 158.10          | 298.18         | 149.59          |                |                  | <b>3</b>  |
| <b>10</b> | 974.49        | 487.75          | 957.47         | 479.24          | 956.48         | 478.75           | <b>P</b> | <b>244.17</b>  | 122.59          | <b>227.14</b>  | 114.07          |                |                  | <b>2</b>  |
| <b>11</b> |               |                 |                |                 |                |                  | <b>K</b> | 147.11         | 74.06           | 130.09         | 65.55           |                |                  | <b>1</b>  |

# PEPAK<sub>ac</sub>SAPAPK

# H2BK5

MS/MS Fragmentation of **PEPAKSAPAPK**  
Found in **gi|1568551**, histone H2B [Homo sapiens]

Match to Query 12566: 1133.610514 from(567.812533,2+)  
From data file histoneoffgelnoPrFr8.dta

Click mouse within plot area to zoom in by factor of two about that point  
Or, Plot from 150 to 1150 Da

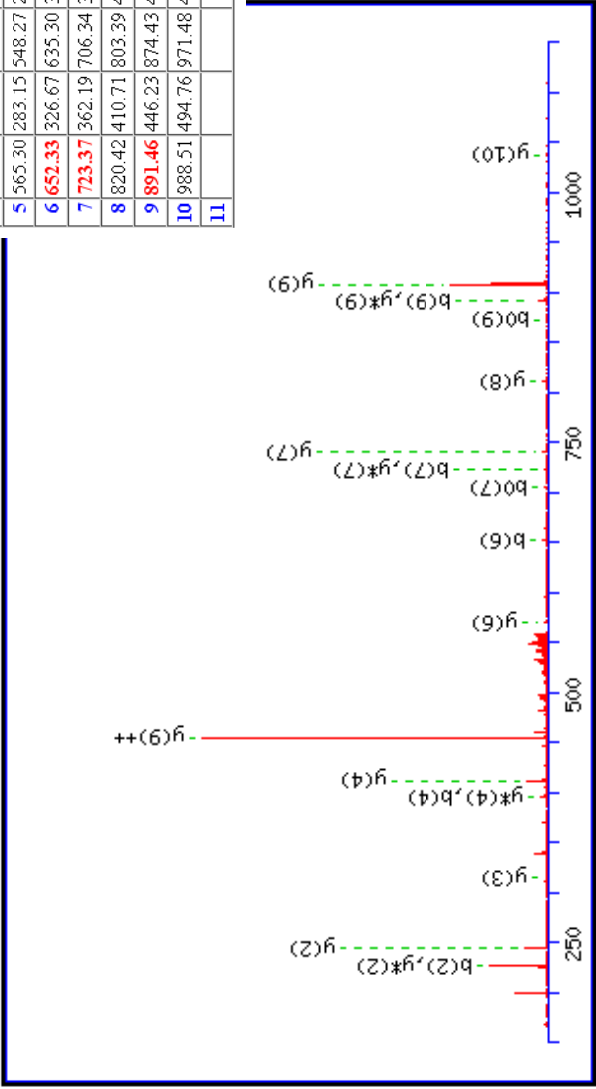

Monoisotopic mass of neutral peptide Mr(calc): 1133.61

Variable modifications:

K5 : Acetyl1 (K)

Ions Score: 45 Expect: 0.0039

Matches (**Bold Red**): 20/100 fragment ions using 44 most intense peaks

| #  | b             | b <sup>++</sup> | b <sup>+</sup> | b <sup>++</sup> | b <sup>0</sup> | b <sup>0++</sup> | Seq. | y              | y <sup>++</sup> | y <sup>+</sup> | y <sup>++</sup> | y <sup>0</sup> | y <sup>0++</sup> | #  |
|----|---------------|-----------------|----------------|-----------------|----------------|------------------|------|----------------|-----------------|----------------|-----------------|----------------|------------------|----|
| 1  | 98.06         | 49.53           |                |                 |                |                  | P    |                |                 |                |                 |                |                  | 11 |
| 2  | <b>227.10</b> | 114.05          |                |                 | 209.09         | 105.05           | E    | <b>1037.56</b> | 519.28          | 1020.54        | 510.77          | 1019.55        | 510.28           | 10 |
| 3  | 324.16        | 162.58          |                |                 | 306.14         | 153.58           | P    | <b>908.52</b>  | <b>454.76</b>   | <b>891.49</b>  | 446.25          | 890.51         | 445.76           | 9  |
| 4  | <b>395.19</b> | 198.10          |                |                 | 377.18         | 189.09           | A    | <b>811.47</b>  | 406.24          | 794.44         | 397.72          | 793.46         | 397.23           | 8  |
| 5  | 565.30        | 283.15          | 548.27         | 274.64          | 547.29         | 274.15           | K    | <b>740.43</b>  | 370.72          | <b>723.40</b>  | 362.21          | 722.42         | 361.71           | 7  |
| 6  | <b>652.33</b> | 326.67          | 635.30         | 318.16          | 634.32         | 317.66           | S    | <b>570.32</b>  | 285.67          | 553.30         | 277.15          | 552.31         | 276.66           | 6  |
| 7  | <b>723.37</b> | 362.19          | 706.34         | 353.67          | <b>705.36</b>  | 353.18           | A    | 483.29         | 242.15          | 466.27         | 233.64          |                |                  | 5  |
| 8  | 820.42        | 410.71          | 803.39         | 402.20          | 802.41         | 401.71           | P    | <b>412.26</b>  | 206.63          | <b>395.23</b>  | 198.12          |                |                  | 4  |
| 9  | <b>891.46</b> | 446.23          | 874.43         | 437.72          | <b>873.45</b>  | 437.23           | A    | <b>315.20</b>  | 158.10          | 298.18         | 149.59          |                |                  | 3  |
| 10 | 988.51        | 494.76          | 971.48         | 486.25          | 970.50         | 485.75           | P    | <b>244.17</b>  | 122.59          | <b>227.14</b>  | 114.07          |                |                  | 2  |
| 11 |               |                 |                |                 |                |                  | K    | 147.11         | 74.06           | 130.09         | 65.55           |                |                  | 1  |

# PEPAK<sub>ac</sub>SAPAPK

# H2BK5

MS/MS Fragmentation of **PEPAKSAPAPK**

Found in **gi|1568551**, histone H2B [Homo sapiens]

Match to Query 13849: 1133.606484 from(567.810518,2+)

From data file HelaHistoneH2A2B.dta

Click mouse within plot area to zoom in by factor of two about that i  
Or, Plot from  to  Da

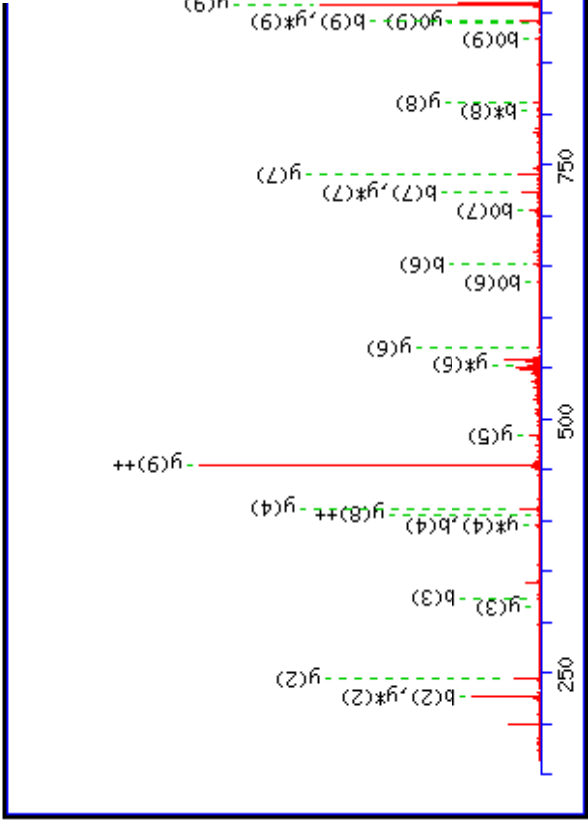

Monoisotopic mass of neutral peptide Mr(calc): 1133.61

Variable modifications:

K5 : Acetyl (K)

Ions Score: 42 Expect: 0.011

Matches (**Bold Red**): 29/100 fragment ions using 84 most intense peaks

| #  | b             | b <sup>++</sup> | b <sup>*</sup> | b <sup>+++</sup> | b <sup>0</sup> | b <sup>0++</sup> | Seq. | y              | y <sup>++</sup> | y <sup>*</sup> | y <sup>+++</sup> | y <sup>0</sup> | y <sup>0++</sup> | #  |
|----|---------------|-----------------|----------------|------------------|----------------|------------------|------|----------------|-----------------|----------------|------------------|----------------|------------------|----|
| 1  | 98.06         | 49.53           |                |                  |                |                  | P    |                |                 |                |                  |                |                  | 11 |
| 2  | <b>227.10</b> | 114.05          |                |                  | 209.09         | 105.05           | E    | <b>1037.56</b> | 519.28          | 1020.54        | 510.77           | <b>1019.55</b> | 510.28           | 10 |
| 3  | <b>324.16</b> | 162.58          |                |                  | 306.14         | 153.58           | P    | <b>908.52</b>  | <b>454.76</b>   | <b>891.49</b>  | 446.25           | <b>890.51</b>  | 445.76           | 9  |
| 4  | <b>395.19</b> | 198.10          |                |                  | 377.18         | 189.09           | A    | <b>811.47</b>  | <b>406.24</b>   | 794.44         | 397.72           | 793.46         | 397.23           | 8  |
| 5  | 565.30        | 283.15          | 548.27         | 274.64           | 547.29         | 274.15           | K    | <b>740.43</b>  | 370.72          | <b>723.40</b>  | 362.21           | 722.42         | 361.71           | 7  |
| 6  | <b>652.33</b> | 326.67          | 635.30         | 318.16           | <b>634.32</b>  | 317.66           | S    | <b>570.32</b>  | 285.67          | <b>553.30</b>  | 277.15           | 552.31         | 276.66           | 6  |
| 7  | <b>723.37</b> | 362.19          | 706.34         | 353.67           | <b>705.36</b>  | 353.18           | A    | <b>483.29</b>  | 242.15          | 466.27         | 233.64           |                |                  | 5  |
| 8  | 820.42        | 410.71          | <b>803.39</b>  | 402.20           | 802.41         | 401.71           | P    | <b>412.26</b>  | 206.63          | <b>395.23</b>  | 198.12           |                |                  | 4  |
| 9  | <b>891.46</b> | 446.23          | 874.43         | 437.72           | <b>873.45</b>  | 437.23           | A    | <b>315.20</b>  | 158.10          | 298.18         | 149.59           |                |                  | 3  |
| 10 | <b>988.51</b> | 494.76          | 971.48         | 486.25           | 970.50         | 485.75           | P    | <b>244.17</b>  | 122.59          | <b>227.14</b>  | 114.07           |                |                  | 2  |
| 11 |               |                 |                |                  |                |                  | K    | 147.11         | 74.06           | 130.09         | 65.55            |                |                  | 1  |

SAPAPK<sub>ac</sub>K<sub>ac</sub>GSK<sub>ac</sub>K<sub>ac</sub>AVTK<sub>ac</sub>AQK

H2BK11, K12, K15, K16, K20

MS/MS Fragmentation of **SAPAPKKGSKKAVTKAQK**  
Found in **g|1568551**, histone H2B [Homo sapiens]

Match to Query 32978: 2034.146764 from(1018.080658,2+)  
From data file HelaHistoneH2A2B.dta

Click mouse within plot area to zoom in by factor of two about that point  
Or, Plot from  to  Da

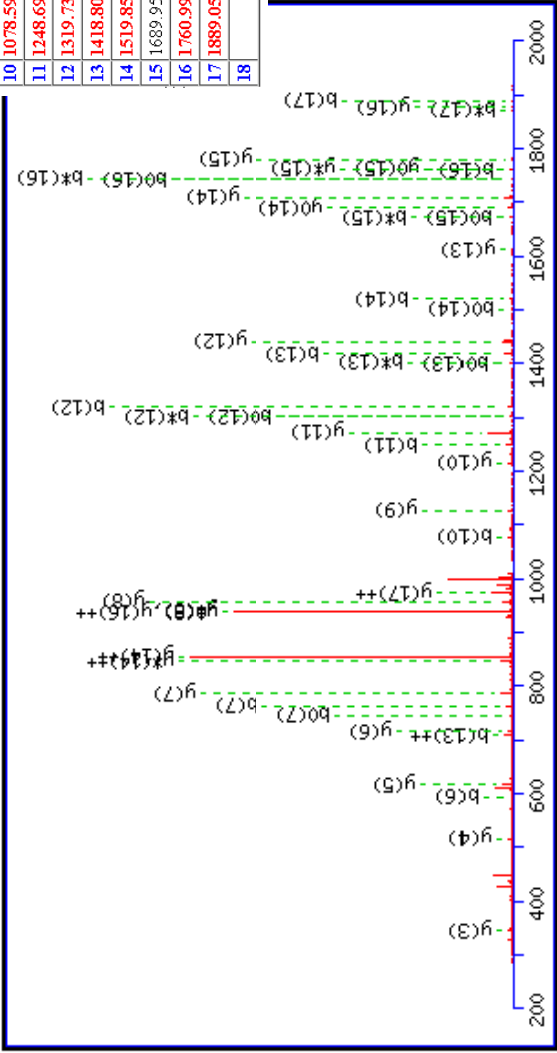

Monoisotopic mass of neutral peptide Mr(calc): 2034.15

Variable modifications:

- K6 : Acetyl (K)
- K7 : Acetyl (K)
- K10 : Acetyl (K)
- K11 : Acetyl (K)
- K15 : Acetyl (K)

Ions Score: 75 Expect: 2.2e-005

Matches (**Bold Red**): 44/186 fragment ions using 83 most intense peaks

| #  | b              | b <sup>++</sup> | b <sup>+</sup> | b <sup>++</sup> | b <sup>0</sup> | b <sup>0+</sup> | Seq. | y              | y <sup>++</sup> | y <sup>+</sup> | y <sup>++</sup> | y <sup>0</sup> | y <sup>0+</sup> | #  |
|----|----------------|-----------------|----------------|-----------------|----------------|-----------------|------|----------------|-----------------|----------------|-----------------|----------------|-----------------|----|
| 1  | 88.04          | 44.52           |                |                 | 70.03          | 35.52           | S    |                |                 |                |                 |                |                 | 18 |
| 2  | 159.08         | 80.04           |                |                 | 141.07         | 71.04           | A    | 1948.12        | <b>974.56</b>   | 1931.10        | 966.05          | 1930.11        | 965.56          | 17 |
| 3  | 256.13         | 128.57          |                |                 | 238.12         | 119.56          | P    | <b>1877.09</b> | <b>939.05</b>   | 1860.06        | 930.53          | 1859.07        | 930.04          | 16 |
| 4  | 327.17         | 164.09          |                |                 | 309.16         | 155.08          | A    | <b>1780.03</b> | 890.52          | <b>1763.01</b> | 882.01          | <b>1762.02</b> | 881.51          | 15 |
| 5  | 424.22         | 212.61          |                |                 | 406.21         | 203.61          | P    | <b>1709.00</b> | <b>855.00</b>   | 1691.97        | <b>846.49</b>   | <b>1690.99</b> | 846.00          | 14 |
| 6  | <b>594.32</b>  | 297.67          | 577.30         | 289.15          | 576.31         | 288.66          | K    | <b>1611.94</b> | 806.48          | 1594.92        | 797.96          | 1593.93        | 797.47          | 13 |
| 7  | <b>764.43</b>  | 382.72          | 747.40         | 374.21          | <b>746.42</b>  | 373.71          | K    | <b>1441.84</b> | 721.42          | 1424.81        | 712.91          | 1423.83        | 712.42          | 12 |
| 8  | 821.45         | 411.23          | 804.43         | 402.72          | 803.44         | 402.22          | G    | <b>1271.73</b> | 636.37          | 1254.71        | 627.86          | 1253.72        | 627.36          | 11 |
| 9  | 908.48         | 454.75          | 891.46         | 446.23          | 890.47         | 445.74          | S    | <b>1214.71</b> | 607.86          | 1197.68        | 599.35          | 1196.70        | 598.85          | 10 |
| 10 | <b>1078.59</b> | 539.80          | 1061.56        | 531.28          | 1060.58        | 530.79          | K    | <b>1127.68</b> | 564.34          | 1110.65        | 555.83          | 1109.67        | 555.34          | 9  |
| 11 | <b>1248.69</b> | 624.85          | 1231.67        | 616.34          | 1230.68        | 615.85          | K    | <b>957.57</b>  | 479.29          | <b>940.55</b>  | 470.78          | <b>939.56</b>  | 470.28          | 8  |
| 12 | <b>1319.73</b> | 660.37          | <b>1302.71</b> | 651.86          | <b>1301.72</b> | 651.36          | A    | <b>787.47</b>  | 394.24          | 770.44         | 385.72          | 769.46         | 385.23          | 7  |
| 13 | <b>1418.80</b> | <b>709.90</b>   | <b>1401.77</b> | 701.39          | <b>1400.79</b> | 700.90          | V    | <b>716.43</b>  | 358.72          | 699.40         | 350.21          | 698.42         | 349.71          | 6  |
| 14 | <b>1519.85</b> | 760.43          | 1502.82        | 751.91          | <b>1501.84</b> | 751.42          | T    | <b>617.36</b>  | 309.18          | 600.34         | 300.67          | 599.35         | 300.18          | 5  |
| 15 | 1689.95        | 845.48          | <b>1672.93</b> | 836.97          | <b>1671.94</b> | 836.48          | K    | <b>516.31</b>  | 258.66          | 499.29         | 250.15          |                |                 | 4  |
| 16 | <b>1760.99</b> | 881.00          | <b>1743.96</b> | 872.49          | <b>1742.98</b> | 871.99          | A    | <b>346.21</b>  | 173.61          | 329.18         | 165.09          |                |                 | 3  |
| 17 | <b>1889.05</b> | 945.03          | <b>1872.02</b> | 936.51          | 1871.04        | 936.02          | Q    | 275.17         | 138.09          | 258.14         | 129.58          |                |                 | 2  |
| 18 |                |                 |                |                 |                |                 | K    | 147.11         | 74.06           | 130.09         | 65.55           |                |                 | 1  |

# pr-SAPAK<sub>pm</sub>

## H2BK11

K.SAPAK.K (+1) - Mod : 70.00 at K(6) - Retention time : 47.41 min - Precursor m/z : 696.39 - Precursor int. : 218674.000 - Basepeak int. : 149358.000

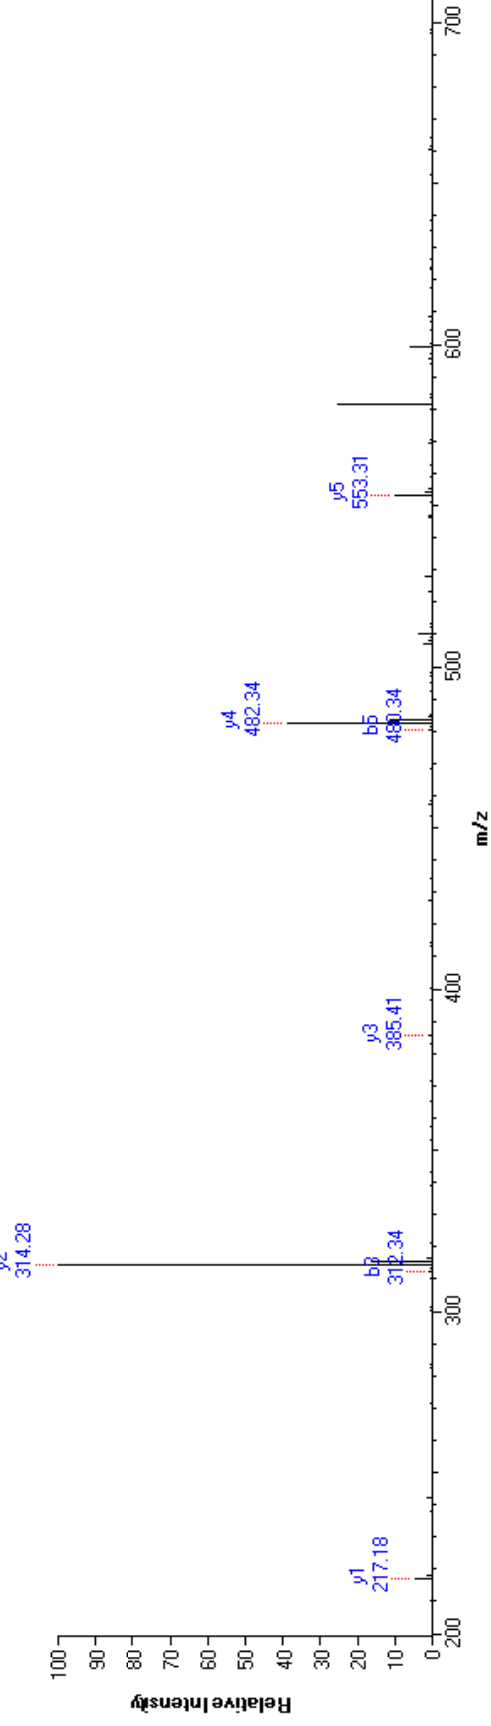

| (b) Seq (y) | b           | b <sup>x</sup> | b <sup>~</sup> | y           | y <sup>x</sup> | y <sup>~</sup> |
|-------------|-------------|----------------|----------------|-------------|----------------|----------------|
| 1 S 6       | 144.0399    | 127.0133       | 126.0293       | 640.3251    | 623.2986       | 622.3146       |
| 2 A 5       | 215.0770    | 198.0504       | 197.0664       | 553.2931 ** | 536.2665       | 535.2825       |
| 3 P 4       | 312.1297 ** | 295.1032       | 294.1192       | 482.2560 ** | 465.2294       | 464.2454       |
| 4 A 3       | 383.1668    | 366.1403       | 365.1563       | 385.2032 ** | 368.1767       | 367.1927       |
| 5 P 2       | 480.2196 ** | 463.1931       | 462.2090       | 314.1661 ** | 297.1396       | 296.1555       |
| 6 K 1       | 678.3146    | 661.2880       | 660.3040       | 217.1133 ** | 200.0868       | 199.1028       |

K<sub>ac</sub>GSK<sub>ac</sub>K<sub>ac</sub>AVTK<sub>ac</sub>AQK

H2BK12, K15, K16, K20

MS/MS Fragmentation of **KGSKKAVTKAQK**  
Found in **gj1568551**, histone H2B [Homo sapiens]

Match to Query 22852: 1440.827184 from(721.420868,2+)  
From data file HelaHistoneH2A2B.dta

Click mouse within plot area to zoom in by factor of two about that point  
Or, Plot from  to  Da

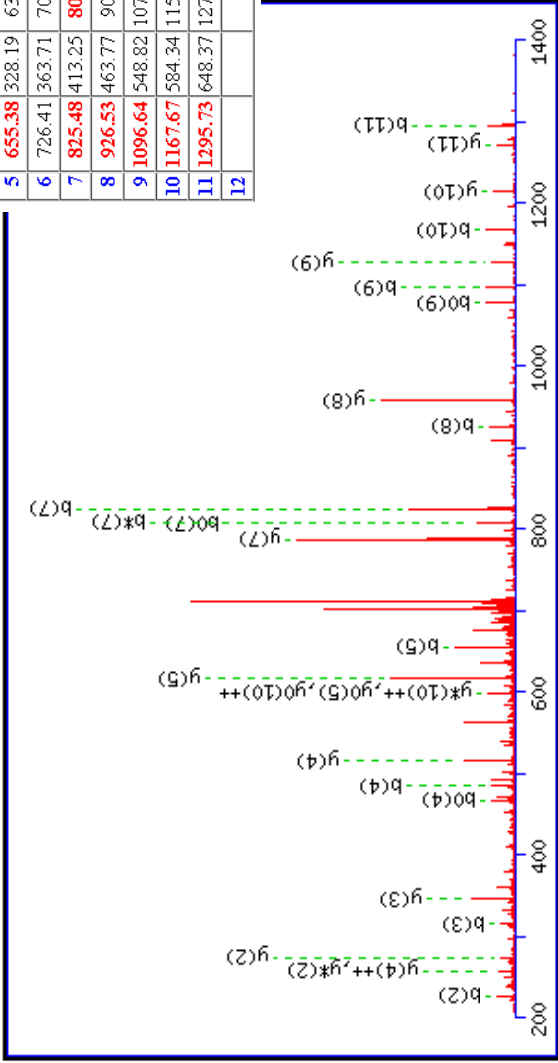

Monoisotopic mass of neutral peptide Mr(calc): 1440.83

Variable modifications:

K1 : Acetyl (K)

K4 : Acetyl (K)

K5 : Acetyl (K)

K9 : Acetyl (K)

Ions Score: 72 Expect: 2.8e-005

Matches (**Bold Red**): 27/120 fragment ions using 39 most intense peaks

| #  | b       | b <sup>++</sup> | b <sup>+</sup> | b <sup>++</sup> | b <sup>0</sup> | b <sup>0++</sup> | Seq. | y       | y <sup>++</sup> | y <sup>+</sup> | y <sup>++</sup> | y <sup>0</sup> | y <sup>0++</sup> | #  |
|----|---------|-----------------|----------------|-----------------|----------------|------------------|------|---------|-----------------|----------------|-----------------|----------------|------------------|----|
| 1  | 171.11  | 86.06           | 154.09         | 77.55           |                |                  | K    |         |                 |                |                 |                |                  | 12 |
| 2  | 228.13  | 114.57          | 211.11         | 106.06          |                |                  | G    | 1271.73 | 636.37          | 1254.71        | 627.86          | 1253.72        | 627.36           | 11 |
| 3  | 315.17  | 158.09          | 298.14         | 149.57          | 297.16         | 149.08           | S    | 1214.71 | 607.86          | 1197.68        | 599.35          | 1196.70        | 598.85           | 10 |
| 4  | 485.27  | 243.14          | 468.25         | 234.63          | 467.26         | 234.13           | K    | 1127.68 | 564.34          | 1110.65        | 555.83          | 1109.67        | 555.34           | 9  |
| 5  | 655.38  | 328.19          | 638.35         | 319.68          | 637.37         | 319.19           | K    | 957.57  | 479.29          | 940.55         | 470.78          | 939.56         | 470.28           | 8  |
| 6  | 726.41  | 363.71          | 709.39         | 355.20          | 708.40         | 354.71           | A    | 787.47  | 394.24          | 770.44         | 385.72          | 769.46         | 385.23           | 7  |
| 7  | 825.48  | 413.25          | 808.46         | 404.73          | 807.47         | 404.24           | V    | 716.43  | 358.72          | 699.40         | 350.21          | 698.42         | 349.71           | 6  |
| 8  | 926.53  | 463.77          | 909.50         | 455.26          | 908.52         | 454.76           | T    | 617.36  | 309.18          | 600.34         | 300.67          | 599.35         | 300.18           | 5  |
| 9  | 1096.64 | 548.82          | 1079.61        | 540.31          | 1078.63        | 539.82           | K    | 516.31  | 258.66          | 499.29         | 250.15          |                |                  | 4  |
| 10 | 1167.67 | 584.34          | 1150.65        | 575.83          | 1149.66        | 575.33           | A    | 346.21  | 173.61          | 329.18         | 165.09          |                |                  | 3  |
| 11 | 1295.73 | 648.37          | 1278.71        | 639.86          | 1277.72        | 639.36           | Q    | 275.17  | 138.09          | 258.14         | 129.58          |                |                  | 2  |
| 12 |         |                 |                |                 |                |                  | K    | 147.11  | 74.06           | 130.09         | 65.55           |                |                  | 1  |



pr-K<sub>pr</sub>GSK<sub>pm</sub>

H2BK15

K.K(+56)GSK.K (+1) - Mod : 70.00 at K(4) - Retention time : 54.67 min - Precursor m/z : 601.36 - Precursor int. : 822496.000 - Basepeak int. : 29775.300

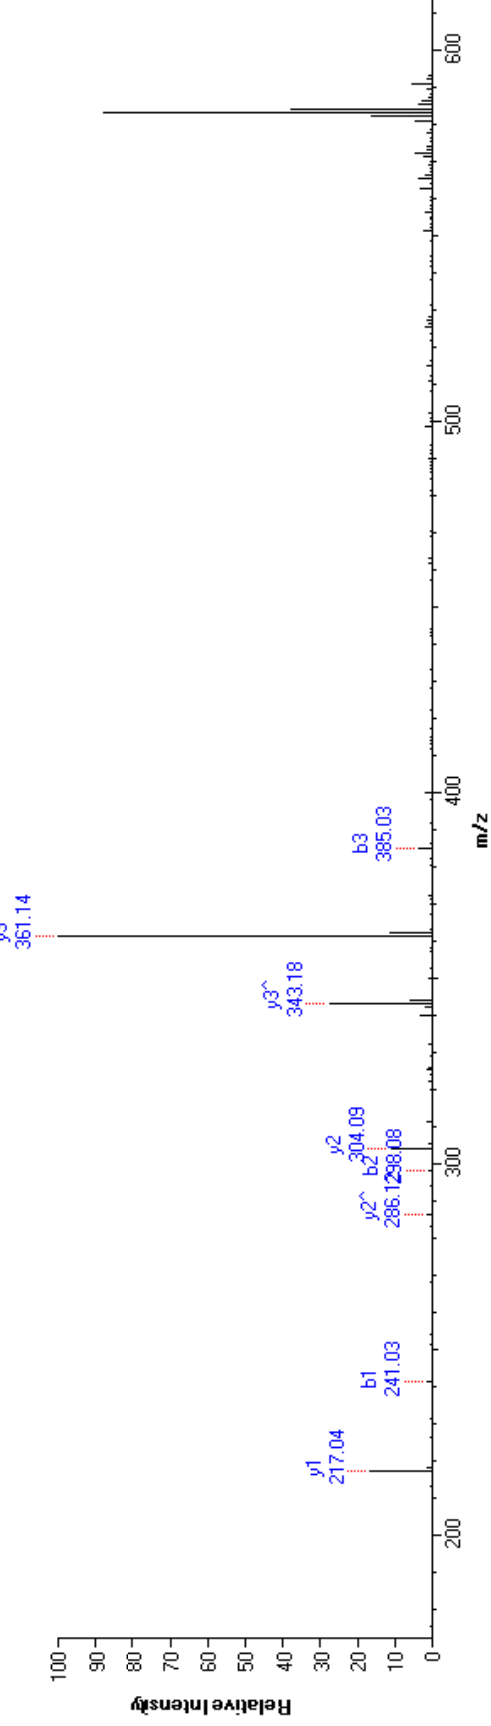

| (b) Seq (y) |     | b                       | b <sup>*</sup> | b <sup>+</sup> | y                       | y <sup>*</sup> | y <sup>+</sup>          |
|-------------|-----|-------------------------|----------------|----------------|-------------------------|----------------|-------------------------|
| 1           | K 4 | 241.1028 <sup>***</sup> | 224.0762       | 223.0922       | 545.2618                | 528.2352       | 527.2512                |
| 2           | G 3 | 298.1242 <sup>***</sup> | 281.0977       | 280.1137       | 361.1668 <sup>***</sup> | 344.1403       | 343.1563 <sup>***</sup> |
| 3           | S 2 | 385.1563 <sup>***</sup> | 368.1297       | 367.1457       | 304.1454 <sup>***</sup> | 287.1188       | 286.1348 <sup>***</sup> |
| 4           | K 1 | 583.2512                | 566.2247       | 565.2407       | 217.1133 <sup>***</sup> | 200.0868       | 199.1028                |

K<sub>ac</sub>AVTK<sub>ac</sub>AQK

H2BK16, K20

MS/MS Fragmentation of **KAVTKAQK**  
Found in **gi|1568551**, histone H2B [Homo sapiens]  
Match to Query 13126: 956.567414 from(479.290983,2+)  
From data file histoneoffgelnoprFr11\_12.dta

Click mouse within plot area to zoom in by factor of two about that position.  
Or, Plot from 100 to 1000 Da

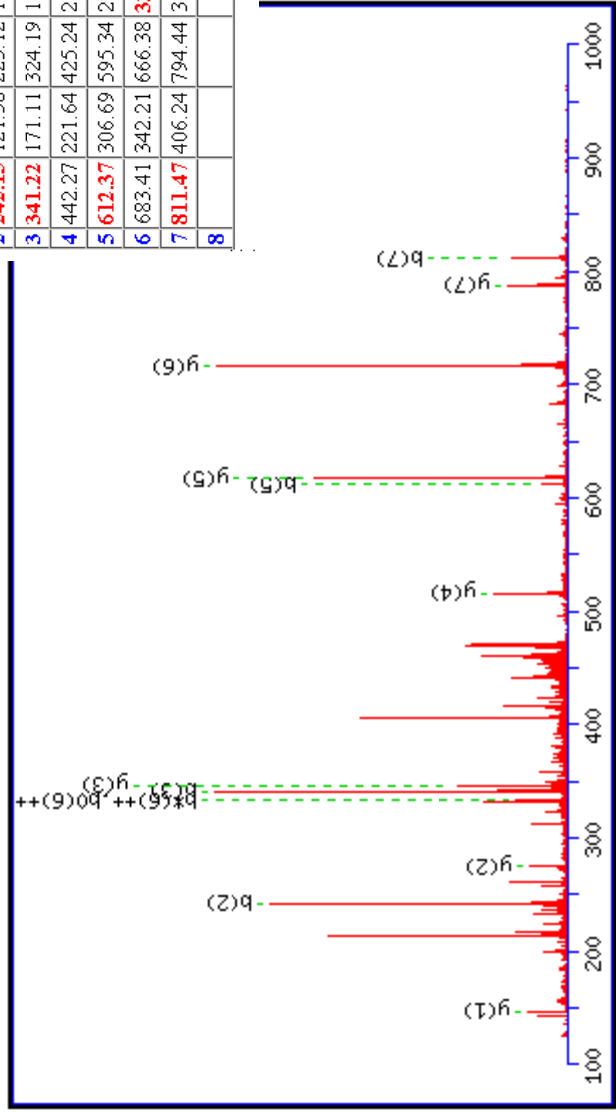

| # | b      | b <sup>++</sup> | b <sup>*</sup> | b <sup>++</sup> | b <sup>0</sup> | b <sup>0++</sup> | Seq. | y      | y <sup>++</sup> | y <sup>*</sup> | y <sup>++</sup> | y <sup>0</sup> | y <sup>0++</sup> | # |
|---|--------|-----------------|----------------|-----------------|----------------|------------------|------|--------|-----------------|----------------|-----------------|----------------|------------------|---|
| 1 | 171.11 | 86.06           | 154.09         | 77.55           |                |                  | K    |        |                 |                |                 |                |                  | 8 |
| 2 | 242.15 | 121.58          | 225.12         | 113.07          |                |                  | A    | 787.47 | 394.24          | 770.44         | 385.72          | 769.46         | 385.23           | 7 |
| 3 | 341.22 | 171.11          | 324.19         | 162.60          |                |                  | V    | 716.43 | 358.72          | 699.40         | 350.21          | 698.42         | 349.71           | 6 |
| 4 | 442.27 | 221.64          | 425.24         | 213.12          | 424.26         | 212.63           | T    | 617.36 | 309.18          | 600.34         | 300.67          | 599.35         | 300.18           | 5 |
| 5 | 612.37 | 306.69          | 595.34         | 298.18          | 594.36         | 297.68           | K    | 516.31 | 258.66          | 499.29         | 250.15          |                |                  | 4 |
| 6 | 683.41 | 342.21          | 666.38         | 333.69          | 665.40         | 333.20           | A    | 346.21 | 173.61          | 329.18         | 165.09          |                |                  | 3 |
| 7 | 811.47 | 406.24          | 794.44         | 397.72          | 793.46         | 397.23           | Q    | 275.17 | 138.09          | 258.14         | 129.58          |                |                  | 2 |
| 8 |        |                 |                |                 |                |                  | K    | 147.11 | 74.06           | 130.09         | 65.55           |                |                  | 1 |

**Monoisotopic mass of neutral peptide Mr(calc): 956.57**  
**Variable modifications:**  
K1 : Acetyl (K)  
K5 : Acetyl (K)  
Ions Score: 35 **Expect:** 0.045  
Matches (**Bold Red**): 13/70 fragment ions using 32 most intense peaks

# K<sub>ac</sub>AVTK<sub>ac</sub>AQK

# H2BK16, K20

MS/MS Fragmentation of **KAVTKAQK**

Found in **gi|1568551**, histone H2B [Homo sapiens]

Match to Query 8179: 956.563204 from(479.288878,24)  
From data file HelaHistoneH2A2B.dta

Click mouse within plot area to zoom in by factor of two :  
Or, Plot from  to  Da

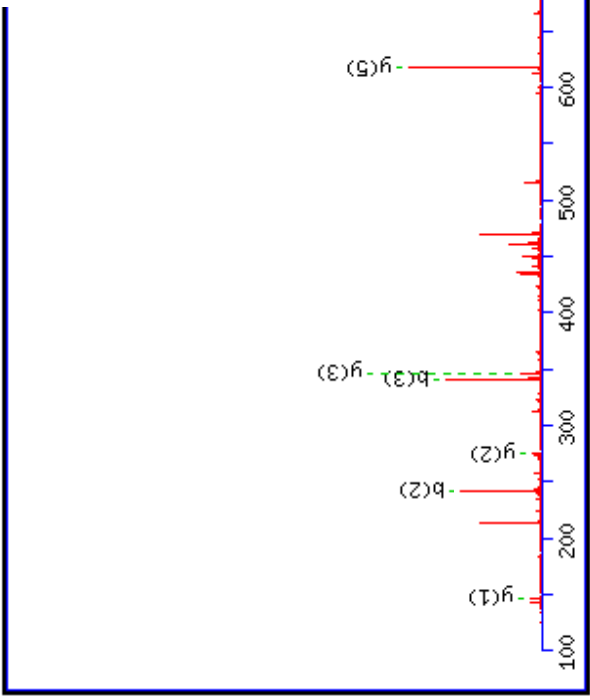

| # | b      | b <sup>++</sup> | b <sup>+</sup> | b <sup>++</sup> | b <sup>0</sup> | b <sup>0++</sup> | Seq. | y      | y <sup>++</sup> | y <sup>+</sup> | y <sup>++</sup> | y <sup>0</sup> | y <sup>0++</sup> | # |
|---|--------|-----------------|----------------|-----------------|----------------|------------------|------|--------|-----------------|----------------|-----------------|----------------|------------------|---|
| 1 | 171.11 | 86.06           | 154.09         | 77.55           |                |                  | K    |        |                 |                |                 |                |                  | 8 |
| 2 | 242.15 | 121.58          | 225.12         | 113.07          |                |                  | A    | 787.47 | 394.24          | 770.44         | 385.72          | 769.46         | 385.23           | 7 |
| 3 | 341.22 | 171.11          | 324.19         | 162.60          |                |                  | V    | 716.43 | 358.72          | 699.40         | 350.21          | 698.42         | 349.71           | 6 |
| 4 | 442.27 | 221.64          | 425.24         | 213.12          | 424.26         | 212.63           | T    | 617.36 | 309.18          | 600.34         | 300.67          | 599.35         | 300.18           | 5 |
| 5 | 612.37 | 306.69          | 595.34         | 298.18          | 594.36         | 297.68           | K    | 516.31 | 258.66          | 499.29         | 250.15          |                |                  | 4 |
| 6 | 683.41 | 342.21          | 666.38         | 333.69          | 665.40         | 333.20           | A    | 346.21 | 173.61          | 329.18         | 165.09          |                |                  | 3 |
| 7 | 811.47 | 406.24          | 794.44         | 397.72          | 793.46         | 397.23           | Q    | 275.17 | 138.09          | 258.14         | 129.58          |                |                  | 2 |
| 8 |        |                 |                |                 |                |                  | K    | 147.11 | 74.06           | 130.09         | 65.55           |                |                  | 1 |

Monoisotopic mass of neutral peptide Mr(calc) : 956.57

Variable modifications:

K1 : Acetyl (K)

K5 : Acetyl (K)

Ions Score: 44 Expect: 0.0095

Matches (**Bold Red**): 9/70 fragment ions using 27 most intense peaks

pr-K<sub>pr</sub>AVTK<sub>pm</sub>

H2BK20

K.K(+56)AVTK(+70).A (+1) - Mod : 0.09 at 0(-1) - Retention time : 59.11 min - Precursor m/z : 728.46 - Precursor int. : 897547.000 - Basepeak int. : 8884.150

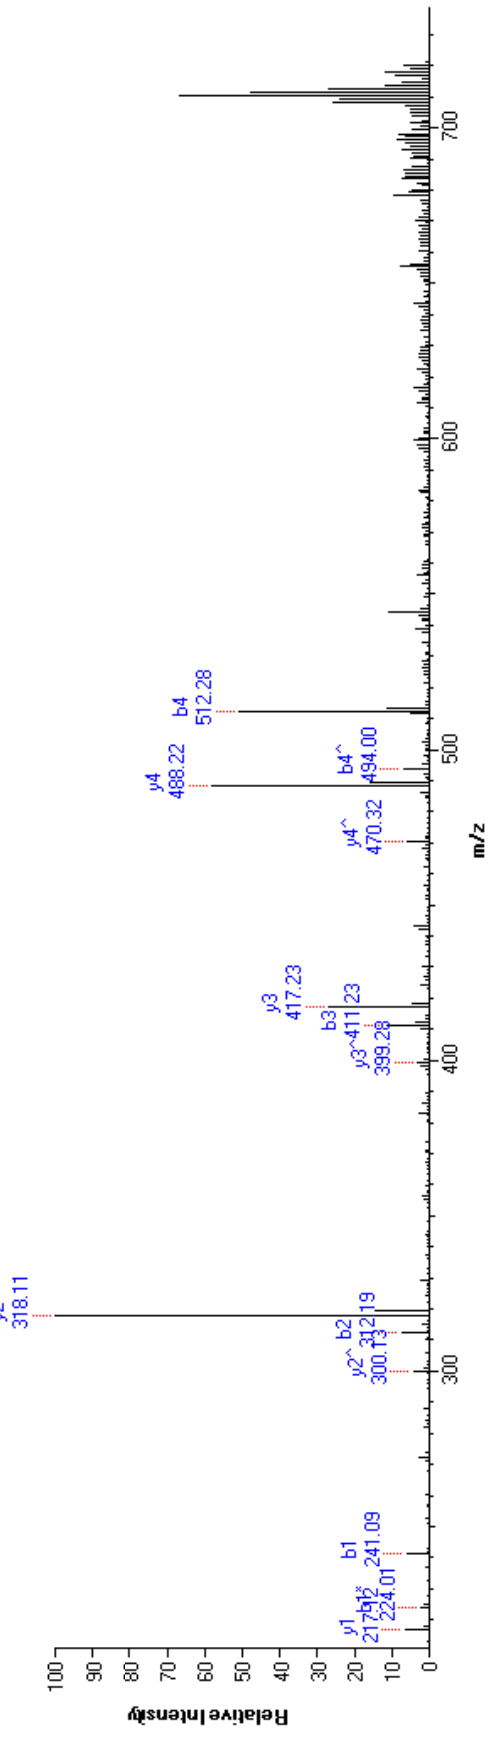

| (b) Seq (y) |     | b                      | b <sup>x</sup>         | b <sup>~</sup>         | y                      | y <sup>x</sup> | y <sup>~</sup>         |
|-------------|-----|------------------------|------------------------|------------------------|------------------------|----------------|------------------------|
| 1           | K 5 | 241.1028 <sup>xx</sup> | 224.0762 <sup>xx</sup> | 223.0922               | 672.3615               | 655.3350       | 654.3510               |
| 2           | A 4 | 312.1399 <sup>xx</sup> | 295.1133               | 294.1293               | 488.2665 <sup>xx</sup> | 471.2400       | 470.2560 <sup>xx</sup> |
| 3           | V 3 | 411.2083 <sup>xx</sup> | 394.1818               | 393.1978               | 417.2294 <sup>xx</sup> | 400.2029       | 399.2189 <sup>xx</sup> |
| 4           | T 2 | 512.2560 <sup>xx</sup> | 495.2294               | 494.2454 <sup>xx</sup> | 318.1610 <sup>xx</sup> | 301.1345       | 300.1505 <sup>xx</sup> |
| 5           | K 1 | 710.3510               | 693.3244               | 692.3404               | 217.1133 <sup>xx</sup> | 200.0868       | 199.1028               |

pr-K<sub>pr</sub>AVTK<sub>ac</sub>AQK<sub>pm</sub> H2BK20, K23

K.K(+56)AVTKAQK(+70).K (+2) - Mod : 42.00 at K(5) - Retention time : 54.28 min - Precursor m/z : 549.33 - Precursor int. : 494535.000 - Basepeak int. : 54341.100

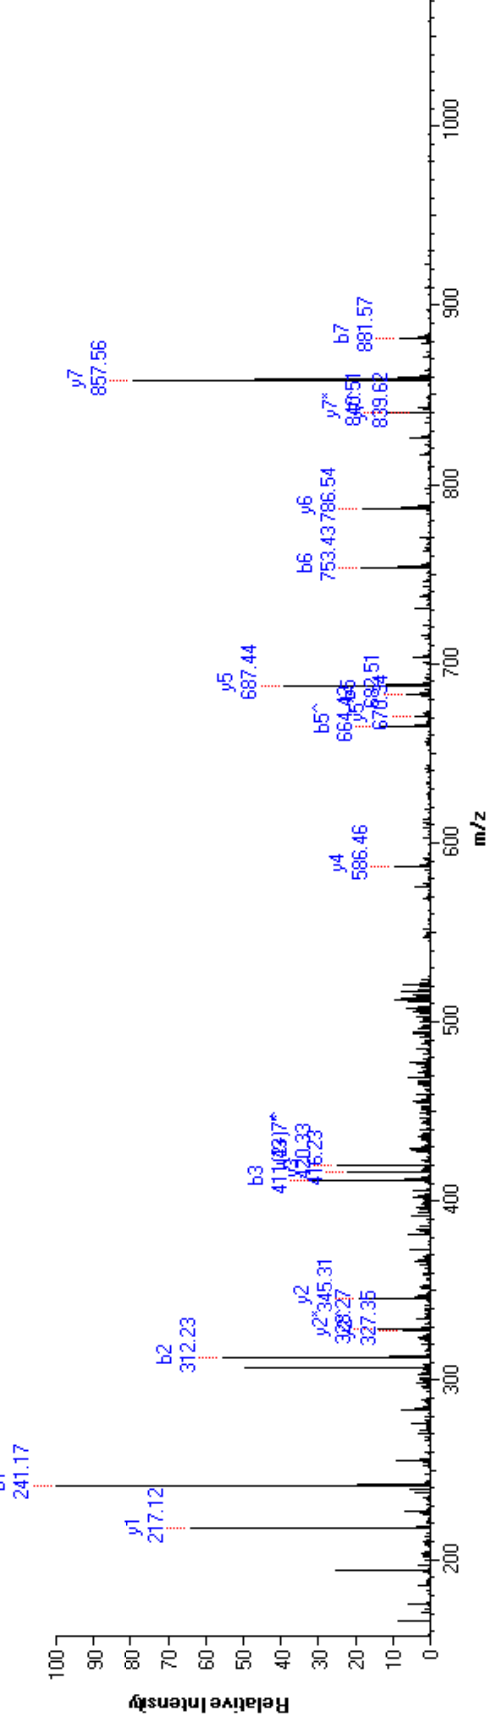

| [b] Seq [y] | b           | b <sup>+</sup> | b <sup>-</sup> | y           | y <sup>+</sup> | y <sup>-</sup> | b(2+)    | b(2+) <sup>+</sup> | b(2+) <sup>-</sup> | y(2+)    | y(2+) <sup>+</sup> | y(2+) <sup>-</sup> |
|-------------|-------------|----------------|----------------|-------------|----------------|----------------|----------|--------------------|--------------------|----------|--------------------|--------------------|
| 1 K 8       | 241.1028 ** | 224.0762       | 223.0922       | 1041.5521   | 1024.5256      | 1023.5416      | 0.0000   | 0.0000             | 0.0000             | 521.2800 | 512.7667           | 512.2747           |
| 2 A 7       | 312.1399 ** | 295.1133       | 294.1293       | 857.4572 ** | 840.4307 **    | 839.4467 **    | 0.0000   | 0.0000             | 0.0000             | 429.2325 | 420.7192 **        | 420.2272 **        |
| 3 V 6       | 411.2083 ** | 394.1818       | 393.1978       | 786.4201 ** | 769.3936       | 768.4095       | 0.0000   | 0.0000             | 0.0000             | 393.7140 | 385.2007           | 384.7087           |
| 4 T 5       | 512.2560    | 495.2294       | 494.2454       | 687.3517 ** | 670.3251 **    | 669.3411       | 0.0000   | 0.0000             | 0.0000             | 344.1797 | 335.6665           | 335.1745           |
| 5 K 4       | 682.3510 ** | 665.3244       | 664.3404 **    | 586.3040 ** | 569.2775       | 568.2935       | 341.6794 | 333.1661           | 332.6741           | 0.0000   | 0.0000             | 0.0000             |
| 6 A 3       | 753.3681 ** | 736.3615       | 735.3775       | 416.2090 ** | 399.1825       | 398.1985       | 377.1979 | 368.6847           | 368.1927           | 0.0000   | 0.0000             | 0.0000             |
| 7 Q 2       | 881.4467 ** | 864.4201       | 863.4361       | 345.1719 ** | 328.1454 **    | 327.1614 **    | 441.2272 | 432.7140           | 432.2220           | 0.0000   | 0.0000             | 0.0000             |
| 8 K 1       | 1079.5416   | 1062.5150      | 1061.5310      | 217.1133 ** | 200.0868       | 199.1028       | 540.2747 | 531.7614           | 531.2694           | 0.0000   | 0.0000             | 0.0000             |

pr-AVTK<sub>ac</sub>AQK<sub>pm</sub>

H2BK20, K23

MS/MS Fragmentation of AVTKAQK

Found in gjl1568551, histone H2B [Homo sapiens]

Match to Query 12498: 912.523844 from(457.269198,2+)

From data file HistoneOffgelFr2\_3.dta

Click mouse within plot area to zoom in by factor of two about that point

Or, Plot from 100 to 950 Da

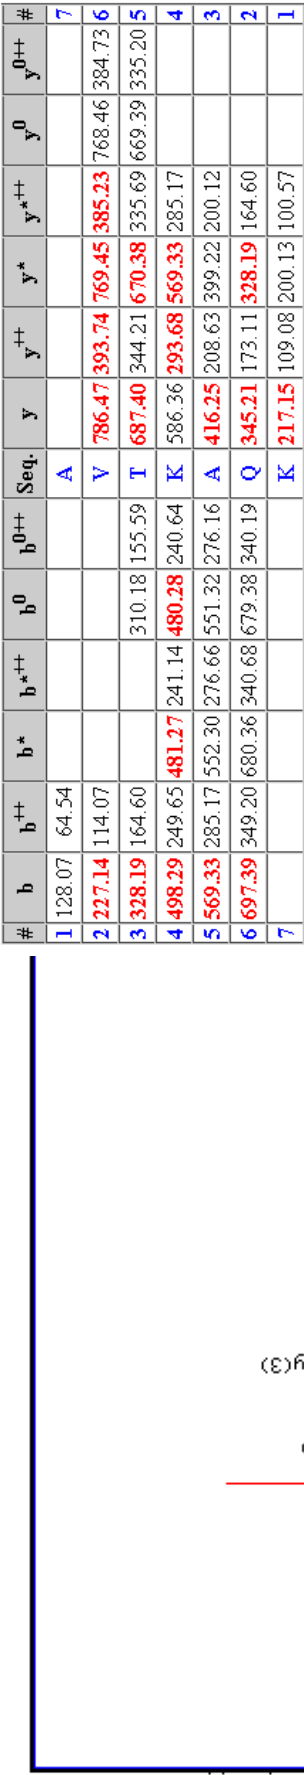

Monoisotopic mass of neutral peptide Mr(calc): 912.53

Fixed modifications: Propionyl (N-term)

Variable modifications:

K4 : Acetyl (K)

K7 : PropionylMethyl (K)

Ions Score: 24 Expect: 0.57

Matches (Bold Red): 19/54 fragment ions using 46 most intense peaks

K<sub>f0</sub>ESYSVVVYK

H2BK34

MS/MS Fragmentation of **KESYSVVVYK**

Found in **gi|1568551**, histone H2B [Homo sapiens]

Match to Query 20089: 1292.628454 from(647.321503,2+)

From data file HelHistoneH2A2B.dta

Click mouse within plot area to zoom in by factor of two about that poi  
Or, Plot from  to  Da

| #  | b       | b <sup>++</sup> | b <sup>+</sup> | b <sup>++</sup> | b <sup>0</sup> | b <sup>0++</sup> | Seq. | y       | y <sup>++</sup> | y <sup>+</sup> | y <sup>++</sup> | y <sup>0</sup> | y <sup>0++</sup> | #  |
|----|---------|-----------------|----------------|-----------------|----------------|------------------|------|---------|-----------------|----------------|-----------------|----------------|------------------|----|
| 1  | 157.10  | 79.05           | 140.07         | 70.54           |                |                  | K    |         |                 |                |                 |                |                  | 10 |
| 2  | 286.14  | 143.57          | 269.11         | 135.06          | 268.13         | 134.57           | E    | 1137.55 | 569.28          | 1120.52        | 560.76          | 1119.54        | 560.27           | 9  |
| 3  | 373.17  | 187.09          | 356.15         | 178.58          | 355.16         | 178.08           | S    | 1008.50 | 504.76          | 991.48         | 496.24          | 990.49         | 495.75           | 8  |
| 4  | 536.24  | 268.62          | 519.21         | 260.11          | 518.22         | 259.62           | Y    | 921.47  | 461.24          | 904.45         | 452.73          | 903.46         | 452.23           | 7  |
| 5  | 623.27  | 312.14          | 606.24         | 303.62          | 605.26         | 303.13           | S    | 758.41  | 379.71          | 741.38         | 371.19          | 740.40         | 370.70           | 6  |
| 6  | 722.34  | 361.67          | 705.31         | 353.16          | 704.32         | 352.67           | V    | 671.38  | 336.19          | 654.35         | 327.68          |                |                  | 5  |
| 7  | 885.40  | 443.20          | 868.37         | 434.69          | 867.39         | 434.20           | Y    | 572.31  | 286.66          | 555.28         | 278.14          |                |                  | 4  |
| 8  | 984.47  | 492.74          | 967.44         | 484.22          | 966.46         | 483.73           | V    | 409.24  | 205.13          | 392.22         | 196.61          |                |                  | 3  |
| 9  | 1147.53 | 574.27          | 1130.50        | 565.76          | 1129.52        | 565.26           | Y    | 310.18  | 155.59          | 293.15         | 147.08          |                |                  | 2  |
| 10 |         |                 |                |                 |                |                  | K    | 147.11  | 74.06           | 130.09         | 65.55           |                |                  | 1  |

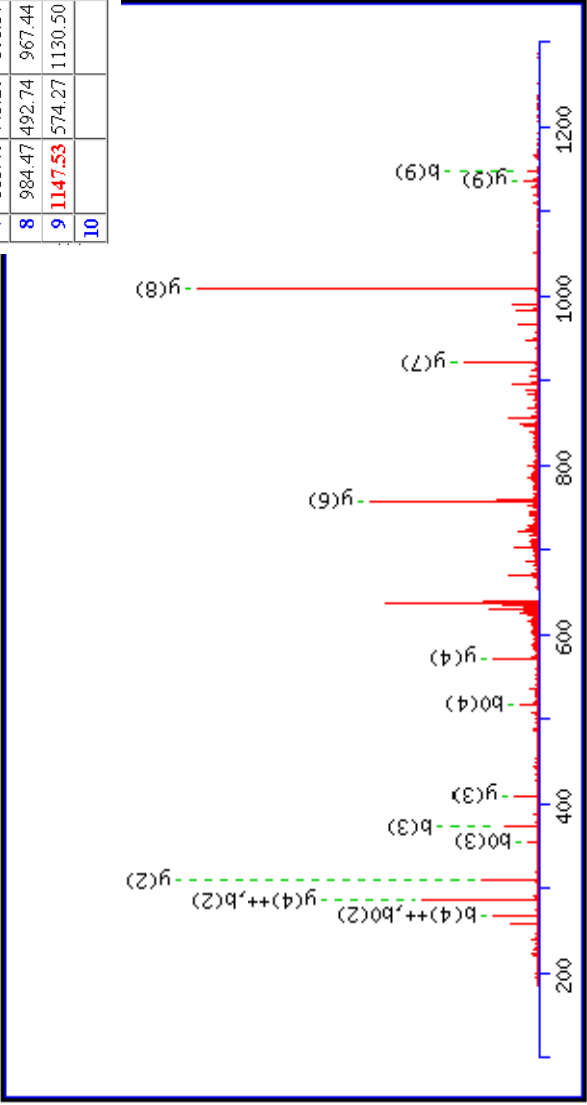

Monoisotopic mass of neutral peptide Mr(calc): 1292.63

Variable modifications:

K1 : Formyl (K)

Ions Score: 45 Expect: 0.0078

Matches (**Bold Red**): 15/96 fragment ions using 34 most intense peaks

ESY<sub>oh</sub>SVYYVK

H2BY37

K.ESYSVYYVK.V (+2) - Mod : 16.00 at Y(3) - Retention time : 76.74 min - Precursor m/z : 577.27 - Precursor int. : 509251.000 - Basepeak int. : 98582.100

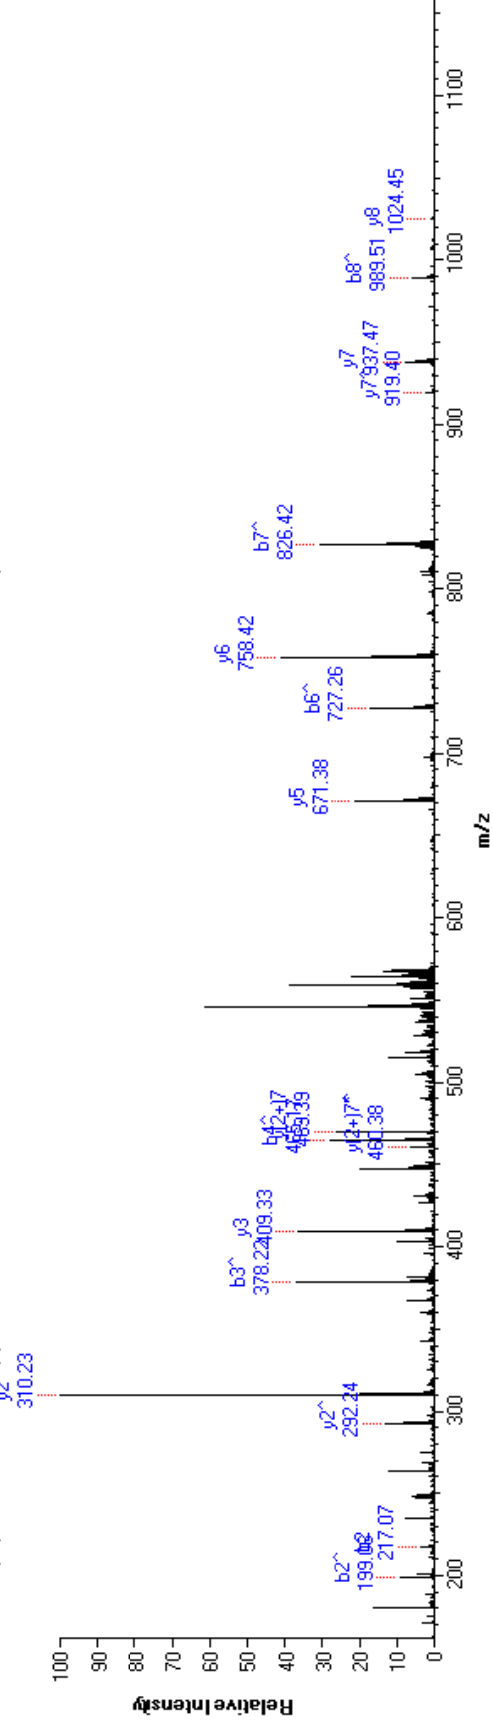

| [b] Seq [y] | b           | b <sup>+</sup> | b <sup>+</sup> | y            | y <sup>+</sup> | y <sup>+</sup> | b(2+)    | b(2+) <sup>+</sup> | y(2+)       | y(2+) <sup>+</sup> | y(2+) <sup>+</sup> |
|-------------|-------------|----------------|----------------|--------------|----------------|----------------|----------|--------------------|-------------|--------------------|--------------------|
| 1 E 9       | 130.0504    | 113.0239       | 112.0399       | 1153.5468    | 1136.5203      | 1135.5363      | 0.0000   | 0.0000             | 577.2773    | 568.7640           | 568.2720           |
| 2 S 8       | 217.0824 ** | 200.0559       | 199.0719 **    | 1024.5043 ** | 1007.4777      | 1006.4937      | 0.0000   | 0.0000             | 512.7560    | 504.2427           | 503.7507           |
| 3 Y 7       | 396.1458    | 379.1192       | 378.1352 **    | 937.4722 **  | 920.4456       | 919.4616 **    | 0.0000   | 0.0000             | 469.2400 ** | 460.7267 **        | 460.2347 **        |
| 4 S 6       | 483.1778    | 466.1513       | 465.1672 **    | 758.4089 **  | 741.3823       | 740.3983       | 0.0000   | 0.0000             | 379.7083    | 371.1951           | 370.7031           |
| 5 V 5       | 582.2462    | 565.2197       | 564.2357       | 671.3768 **  | 654.3503       | 653.3663       | 0.0000   | 0.0000             | 336.1923    | 327.6790           | 327.1870           |
| 6 Y 4       | 745.3096    | 728.2830       | 727.2990 **    | 572.3084     | 555.2819       | 554.2979       | 0.0000   | 0.0000             | 0.0000      | 0.0000             | 0.0000             |
| 7 V 3       | 844.3779    | 827.3514       | 826.3674 **    | 409.2451 **  | 392.2185       | 391.2345       | 0.0000   | 0.0000             | 0.0000      | 0.0000             | 0.0000             |
| 8 Y 2       | 1007.4413   | 990.4147       | 989.4307 **    | 310.1767 **  | 293.1501       | 292.1661 **    | 0.0000   | 0.0000             | 0.0000      | 0.0000             | 0.0000             |
| 9 K 1       | 1135.5363   | 1118.5098      | 1117.5256      | 147.1133     | 130.0868       | 129.1028       | 568.2720 | 559.7588           | 0.0000      | 0.0000             | 0.0000             |

KESY<sub>oh</sub>SVYVYK

H2BY37

MS/MS Fragmentation of **KESYSVVYVYK**

Found in **gi|1568551**, histone H2B [Homo sapiens]

Match to Query 19842: 1280.626014 from(641.320283,2+)  
From data file HelaHistoneH2A2B.dta

Click mouse within plot area to zoom in by factor of two about the  
Or, Plot from  to  Da

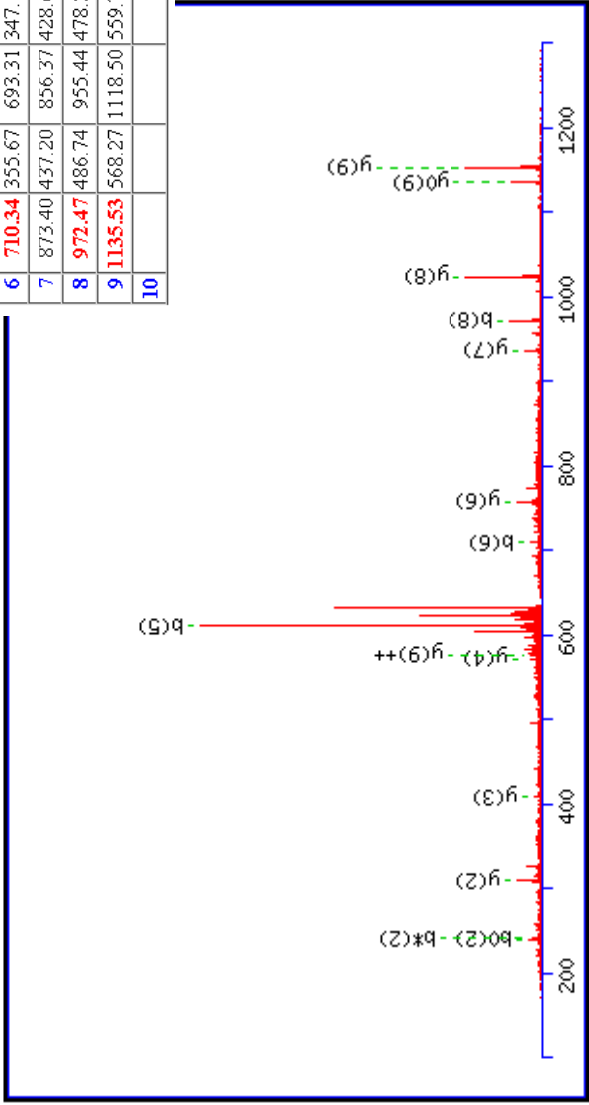

Monoisotopic mass of neutral peptide Mr(calc): 1280.63

Variable modifications:

Y4 : Hydroxylation (Y)

Ions Score: 42 Expect: 0.016

Matches (**Bold Red**): 15/96 fragment ions using 47 most intense peaks

| #  | b       | b <sup>++</sup> | b <sup>+</sup> | b <sup>++</sup> | b <sup>0</sup> | b <sup>0++</sup> | Seq. | y       | y <sup>++</sup> | y <sup>+</sup> | y <sup>++</sup> | y <sup>0</sup> | y <sup>0++</sup> | #  |
|----|---------|-----------------|----------------|-----------------|----------------|------------------|------|---------|-----------------|----------------|-----------------|----------------|------------------|----|
| 1  | 129.10  | 63.03           | 112.08         | 56.34           |                |                  | K    |         |                 |                |                 |                |                  | 10 |
| 2  | 258.14  | 129.58          | 241.12         | 121.06          | 240.13         | 120.57           | E    | 1153.54 | 577.27          | 1136.51        | 568.76          | 1135.53        | 568.27           | 9  |
| 3  | 345.18  | 173.09          | 328.15         | 164.58          | 327.17         | 164.09           | S    | 1024.50 | 512.75          | 1007.47        | 504.24          | 1006.49        | 503.75           | 8  |
| 4  | 524.24  | 262.62          | 507.21         | 254.11          | 506.22         | 253.62           | Y    | 937.47  | 469.24          | 920.44         | 460.72          | 919.46         | 460.23           | 7  |
| 5  | 611.27  | 306.14          | 594.24         | 297.62          | 593.26         | 297.13           | S    | 758.41  | 379.71          | 741.38         | 371.19          | 740.40         | 370.70           | 6  |
| 6  | 710.34  | 355.67          | 693.31         | 347.16          | 692.32         | 346.67           | V    | 671.38  | 336.19          | 654.35         | 327.68          |                |                  | 5  |
| 7  | 873.40  | 437.20          | 856.37         | 428.69          | 855.39         | 428.20           | Y    | 572.31  | 286.66          | 555.28         | 278.14          |                |                  | 4  |
| 8  | 972.47  | 486.74          | 955.44         | 478.22          | 954.46         | 477.73           | V    | 409.24  | 205.13          | 392.22         | 196.61          |                |                  | 3  |
| 9  | 1135.53 | 568.27          | 1118.50        | 559.76          | 1117.52        | 559.26           | Y    | 310.18  | 155.59          | 293.15         | 147.08          |                |                  | 2  |
| 10 |         |                 |                |                 |                |                  | K    | 147.11  | 74.06           | 130.09         | 65.55           |                |                  | 1  |

# VLK<sub>f</sub>QVHPDTGISSK

## H2BK46

MS/MS Fragmentation of **VLKQVHPDTGISSK**

Found in **gi|1568551**, histone H2B [Homo sapiens]

Match to Query 24241: 1535.827424 from(768.920988,2+)

From data file HelaHistoneH2A2B.dta

Click mouse within plot area to zoom in by factor of two about

Or, Plot from  to  Da

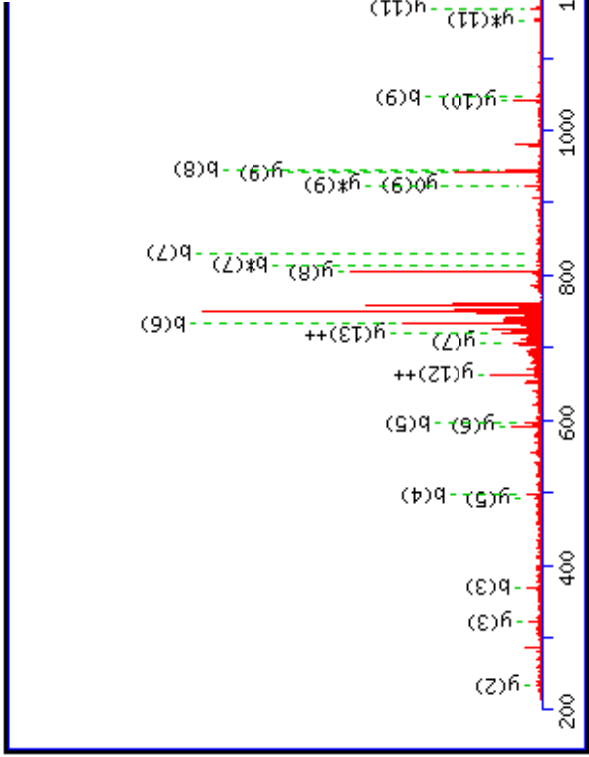

**Monoisotopic mass of neutral peptide Mr(calc): 1535.83**

**Variable modifications:**

**K3** : Formyl (K)

**Ions Score: 66 Expect: 8.7e-005**

**Matches (Bold Red): 28/136** fragment ions using 78 most intense peaks

| #  | b       | b <sup>++</sup> | b <sup>*</sup> | b <sup>+++</sup> | b <sup>0</sup> | b <sup>0++</sup> | Seq. | y       | y <sup>++</sup> | y <sup>*</sup> | y <sup>+++</sup> | y <sup>0</sup> | y <sup>0++</sup> | #  |
|----|---------|-----------------|----------------|------------------|----------------|------------------|------|---------|-----------------|----------------|------------------|----------------|------------------|----|
| 1  | 100.08  | 50.54           |                |                  |                |                  | V    |         |                 |                |                  |                |                  | 14 |
| 2  | 213.16  | 107.08          |                |                  |                |                  | L    | 1437.77 | 719.39          | 1420.74        | 710.88           | 1419.76        | 710.38           | 13 |
| 3  | 369.25  | 185.13          | 352.22         | 176.62           |                |                  | K    | 1324.69 | 662.85          | 1307.66        | 654.33           | 1306.67        | 653.84           | 12 |
| 4  | 497.31  | 249.16          | 480.28         | 240.64           |                |                  | Q    | 1168.60 | 584.80          | 1151.57        | 576.29           | 1150.59        | 575.80           | 11 |
| 5  | 596.38  | 298.69          | 579.35         | 290.18           |                |                  | V    | 1040.54 | 520.77          | 1023.51        | 512.26           | 1022.53        | 511.77           | 10 |
| 6  | 733.44  | 367.22          | 716.41         | 358.71           |                |                  | H    | 941.47  | 471.24          | 924.44         | 462.72           | 923.46         | 462.23           | 9  |
| 7  | 830.49  | 415.75          | 813.46         | 407.23           |                |                  | P    | 804.41  | 402.71          | 787.38         | 394.20           | 786.40         | 393.70           | 8  |
| 8  | 945.52  | 473.26          | 928.49         | 464.75           | 927.50         | 464.26           | D    | 707.36  | 354.18          | 690.33         | 345.67           | 689.35         | 345.18           | 7  |
| 9  | 1046.56 | 523.79          | 1029.54        | 515.27           | 1028.55        | 514.78           | T    | 592.33  | 296.67          | 575.30         | 288.16           | 574.32         | 287.66           | 6  |
| 10 | 1103.58 | 552.30          | 1086.56        | 543.78           | 1085.57        | 543.29           | G    | 491.28  | 246.14          | 474.26         | 237.63           | 473.27         | 237.14           | 5  |
| 11 | 1216.67 | 608.84          | 1199.64        | 600.32           | 1198.66        | 599.83           | I    | 434.26  | 217.63          | 417.23         | 209.12           | 416.25         | 208.63           | 4  |
| 12 | 1303.70 | 652.35          | 1286.67        | 643.84           | 1285.69        | 643.35           | S    | 321.18  | 161.09          | 304.15         | 152.58           | 303.17         | 152.09           | 3  |
| 13 | 1390.73 | 695.87          | 1373.71        | 687.36           | 1372.72        | 686.86           | S    | 234.14  | 117.58          | 217.12         | 109.06           | 216.13         | 108.57           | 2  |
| 14 |         |                 |                |                  |                |                  | K    | 147.11  | 74.06           | 130.09         | 65.55            |                |                  | 1  |

H2BK57

pr-QVHPDTGISSK<sub>pm</sub>

K.QVHPDTGISSK.A (+2) - Mod : 70.00 at K(11) - Retention time : 49.82 min - Precursor m/z : 647.83 - Precursor int. : 1947200.000<sub>b8</sub> Basepeak int. : 233758.000

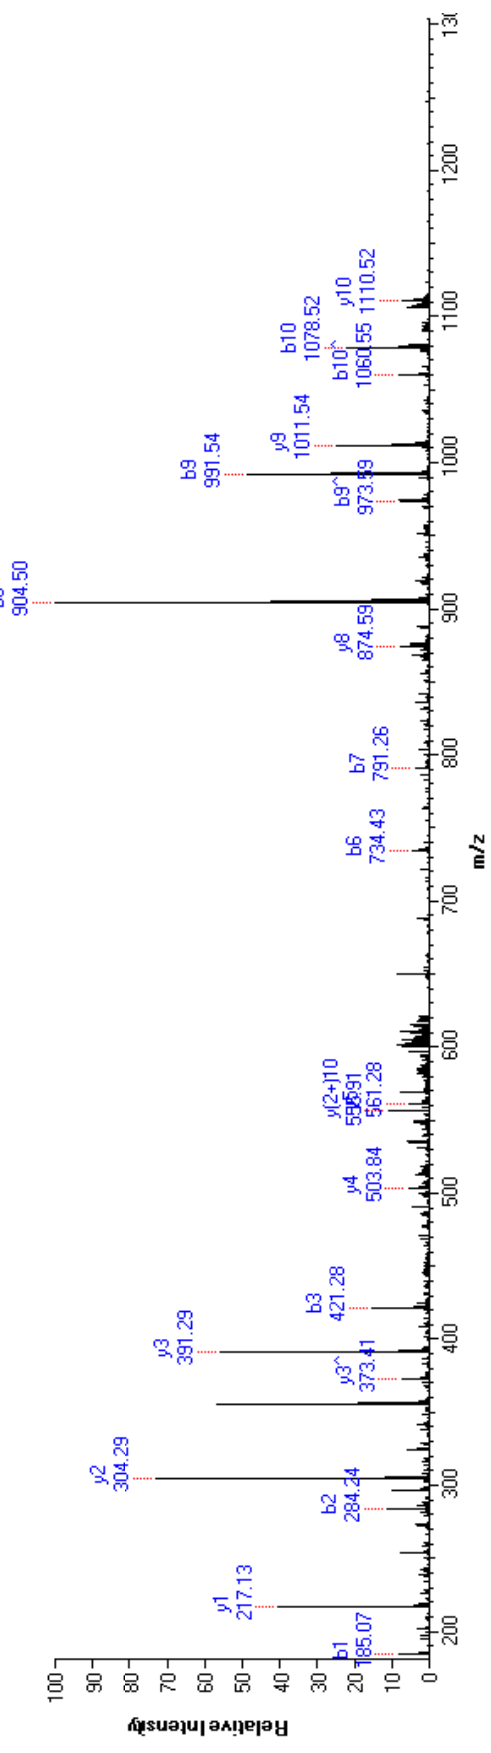

| [b] Seq [y] | b                       | b <sup>+</sup> | b <sup>-</sup>          | y                       | y <sup>+</sup> | y <sup>-</sup>         | b(2+)    | b(2+) <sup>+</sup> | b(2+) <sup>-</sup> | y(2+)                  | y(2+) <sup>+</sup> | y(2+) <sup>-</sup> |
|-------------|-------------------------|----------------|-------------------------|-------------------------|----------------|------------------------|----------|--------------------|--------------------|------------------------|--------------------|--------------------|
| 1 Q 11      | 185.0664 <sup>xx</sup>  | 168.0399       | 167.0558                | 1238.5962               | 1221.5697      | 1220.5957              | 0.0000   | 0.0000             | 0.0000             | 619.8020               | 611.2888           | 610.7968           |
| 2 V 10      | 284.1348 <sup>xx</sup>  | 267.1083       | 266.1243                | 1110.5376 <sup>xx</sup> | 1093.5111      | 1092.5271              | 0.0000   | 0.0000             | 0.0000             | 555.7727 <sup>xx</sup> | 547.2595           | 546.7675           |
| 3 H 9       | 421.1937 <sup>xx</sup>  | 404.1672       | 403.1832                | 1011.4692 <sup>xx</sup> | 994.4427       | 993.4587               | 0.0000   | 0.0000             | 0.0000             | 506.2385               | 497.7253           | 497.2332           |
| 4 P 8       | 518.2465                | 501.2199       | 500.2359                | 874.4103 <sup>xx</sup>  | 857.3838       | 856.3997               | 0.0000   | 0.0000             | 0.0000             | 437.7091               | 429.1958           | 428.7038           |
| 5 D 7       | 633.2734                | 616.2469       | 615.2629                | 777.3575                | 760.3310       | 759.3470               | 317.1406 | 308.6273           | 308.1353           | 389.1827               | 380.6694           | 380.1774           |
| 6 T 6       | 734.3211 <sup>xx</sup>  | 717.2946       | 716.3105                | 662.3306                | 645.3041       | 644.3201               | 367.6645 | 359.1512           | 358.6592           | 0.0000                 | 0.0000             | 0.0000             |
| 7 G 5       | 791.3426 <sup>xx</sup>  | 774.3160       | 773.3320                | 561.2829 <sup>xx</sup>  | 544.2564       | 543.2723               | 396.1752 | 387.6619           | 387.1699           | 0.0000                 | 0.0000             | 0.0000             |
| 8 I 4       | 904.4266 <sup>xx</sup>  | 887.4001       | 886.4161                | 504.2615 <sup>xx</sup>  | 487.2349       | 486.2509               | 452.7172 | 444.2039           | 443.7119           | 0.0000                 | 0.0000             | 0.0000             |
| 9 S 3       | 991.4587 <sup>xx</sup>  | 974.4321       | 973.4481 <sup>xx</sup>  | 391.1774 <sup>xx</sup>  | 374.1509       | 373.1668 <sup>xx</sup> | 496.2332 | 487.7200           | 487.2280           | 0.0000                 | 0.0000             | 0.0000             |
| 10 S 2      | 1078.4907 <sup>xx</sup> | 1061.4641      | 1060.4801 <sup>xx</sup> | 304.1454 <sup>xx</sup>  | 287.1188       | 286.1348               | 539.7493 | 531.2360           | 530.7440           | 0.0000                 | 0.0000             | 0.0000             |
| 11 K 1      | 1276.5857               | 1259.5591      | 1258.5751               | 217.1133 <sup>xx</sup>  | 200.0868       | 199.1028               | 638.7968 | 630.2834           | 629.7914           | 0.0000                 | 0.0000             | 0.0000             |

pr-IAGEASR<sub>me1</sub>

H2BR79

MS/MS Fragmentation of **IAGEASR**  
Found in **gi|1568551**, histone H2B [Homo sapiens]

Match to Query 8312: 772.408494 from(773.415770,1+)  
From data file HistoneOffgfr10\_12.dta

Click mouse within plot area to zoom in by factor of two about that point  
Or, Plot from  to  Da

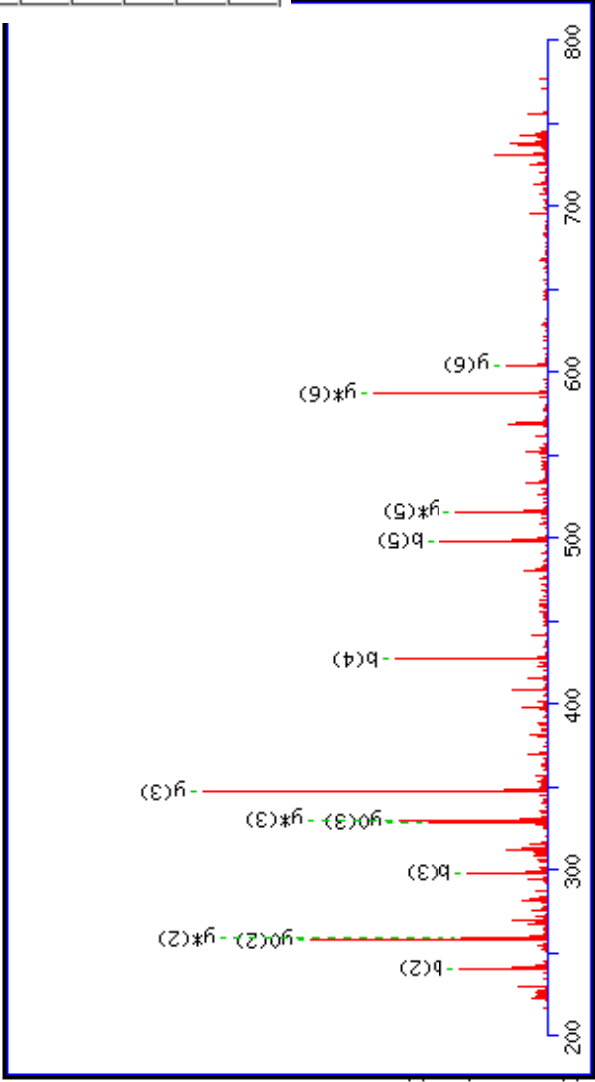

| #        | b             | b <sup>0</sup> | Seq.     | y             | y <sup>*</sup> | y <sup>0</sup> | #        |
|----------|---------------|----------------|----------|---------------|----------------|----------------|----------|
| <b>1</b> | 170.12        |                | <b>I</b> |               |                |                | <b>7</b> |
| <b>2</b> | <b>241.15</b> |                | <b>A</b> | <b>604.30</b> | <b>587.28</b>  | 586.29         | <b>6</b> |
| <b>3</b> | <b>298.18</b> |                | <b>G</b> | 533.27        | <b>516.24</b>  | 515.26         | <b>5</b> |
| <b>4</b> | <b>427.22</b> | 409.21         | <b>E</b> | 476.25        | 459.22         | 458.24         | <b>4</b> |
| <b>5</b> | <b>498.26</b> | 480.25         | <b>A</b> | <b>347.20</b> | <b>330.18</b>  | <b>329.19</b>  | <b>3</b> |
| <b>6</b> | 585.29        | 567.28         | <b>S</b> | 276.17        | <b>259.14</b>  | <b>258.16</b>  | <b>2</b> |
| <b>7</b> |               |                | <b>R</b> | 189.13        | 172.11         |                | <b>1</b> |

Monoisotopic mass of neutral peptide Mr(calc): 772.41

Fixed modifications: Propionyl (N-term)

Variable modifications:

R7 : Methyl (R)

Ions Score: 24 Expect: 0.23

Matches (**Bold Red**): 12/26 fragment ions using 26 most intense peaks

pr-LAHY<sub>oh</sub>NK<sub>pr</sub>

H2BY83

R.LAHY(NK(+56).R (+1) - Mod : 16.00 at Y(4) - Retention time : 48.20 min - Precursor m/z : 873.44 - Precursor int. : 584228.000 - Basepeak int. : 41851.800

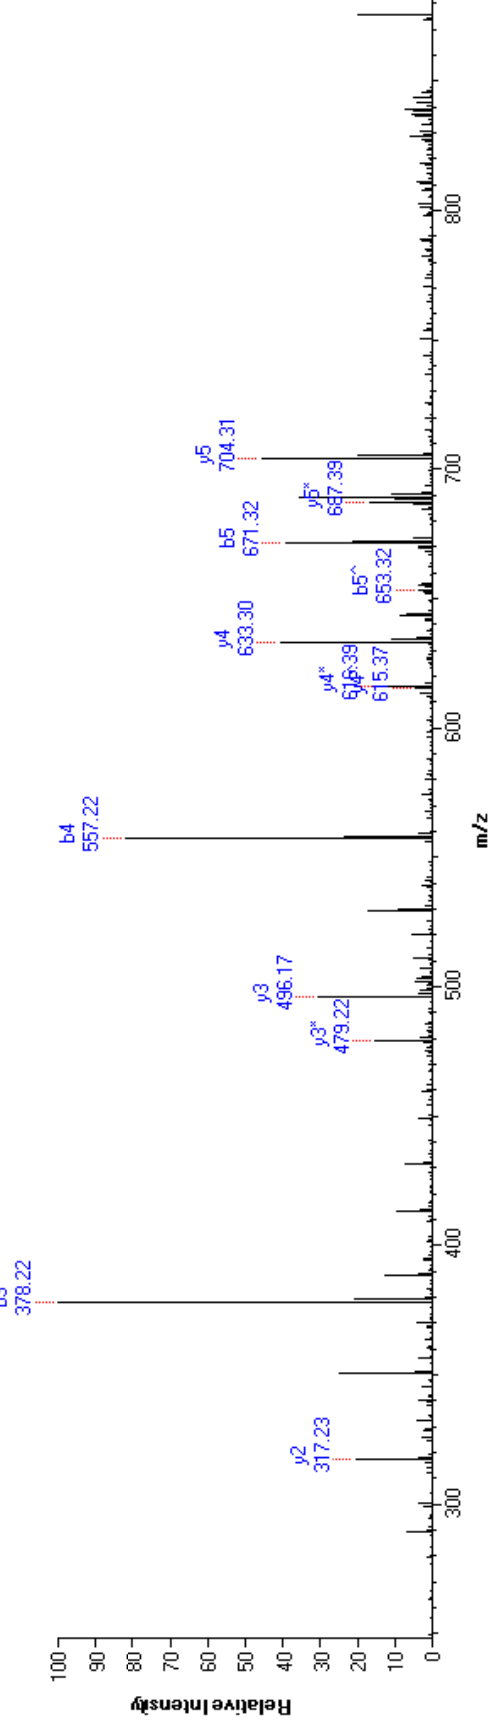

| [b] Seq (y) | b           | b*       | b~          | y           | y*          | y~          |
|-------------|-------------|----------|-------------|-------------|-------------|-------------|
| 1 L 6       | 170.0919    | 153.0653 | 152.0813    | 817.3997    | 800.3732    | 799.3891    |
| 2 A 5       | 241.1290    | 224.1024 | 223.1184    | 704.3156 ** | 687.2891 ** | 686.3051    |
| 3 H 4       | 378.1879 ** | 361.1614 | 360.1773    | 633.2785 ** | 616.2520 ** | 615.2679 ** |
| 4 Y 3       | 557.2512 ** | 540.2247 | 539.2407    | 496.2196 ** | 479.1931 ** | 478.2090    |
| 5 N 2       | 671.2942 ** | 654.2676 | 653.2836 ** | 317.1563 ** | 300.1297    | 299.1457    |
| 6 K 1       | 855.3891    | 838.3626 | 837.3785    | 203.1133    | 186.0868    | 185.1028    |

LAHY<sub>oh</sub>NK<sub>pr</sub>R

H2BY83

R.LAHYNKR.S (+2) - Mod : 16.00 at Y(4) - Retention time : 19.16 min - Precursor m/z : 487.26 - Precursor int. : 254542.000 - Basepeak int. : 92234.400

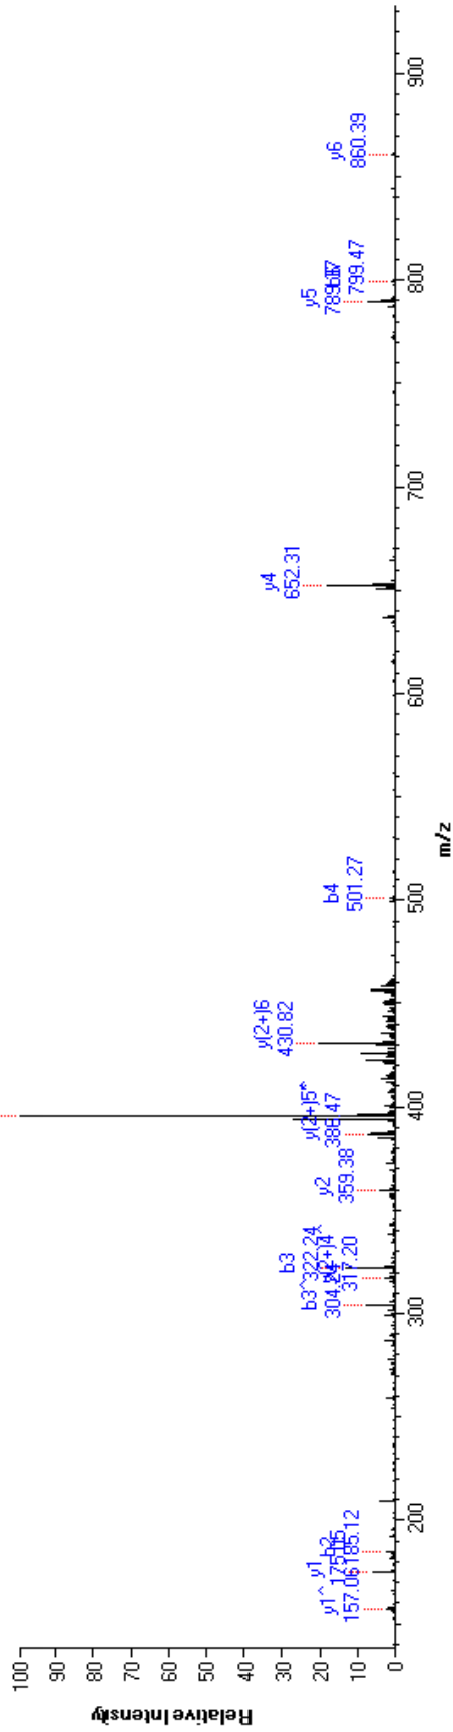

| [b] Seq (y) | b           | b*       | b^          | y           | y*       | y^          | b(2+)    | b(2+)*   | b(2+)^   | y(2+)       | y(2+)*      | y(2+)^      |
|-------------|-------------|----------|-------------|-------------|----------|-------------|----------|----------|----------|-------------|-------------|-------------|
| 1 L 7       | 114.0919    | 97.0653  | 96.0813     | 973.5008    | 956.4742 | 955.4902    | 0.0000   | 0.0000   | 0.0000   | 487.2543    | 478.7410    | 478.2490    |
| 2 A 6       | 185.1290 ** | 168.1024 | 167.1184    | 860.4167 ** | 843.3902 | 842.4062    | 0.0000   | 0.0000   | 0.0000   | 430.7123 ** | 422.1990    | 421.7070    |
| 3 H 5       | 322.1879 ** | 305.1614 | 304.1773 ** | 789.3796 ** | 772.3531 | 771.3691    | 0.0000   | 0.0000   | 0.0000   | 395.1937 ** | 386.6805 ** | 386.1884 ** |
| 4 Y 4       | 501.2512 ** | 484.2247 | 483.2407    | 652.3207 ** | 635.2942 | 634.3102    | 0.0000   | 0.0000   | 0.0000   | 326.6643    | 318.1510    | 317.6590 ** |
| 5 N 3       | 615.2942    | 598.2676 | 597.2836    | 473.2574    | 456.2308 | 455.2468    | 308.1510 | 0.0000   | 0.0000   | 0.0000      | 0.0000      | 0.0000      |
| 6 K 2       | 799.3891 ** | 782.3626 | 781.3785    | 359.2144 ** | 342.1879 | 341.2039    | 400.1985 | 391.6852 | 391.1932 | 0.0000      | 0.0000      | 0.0000      |
| 7 R 1       | 955.4902    | 938.4637 | 937.4797    | 175.1195 ** | 158.0930 | 157.1089 ** | 478.2490 | 469.7357 | 469.2437 | 0.0000      | 0.0000      | 0.0000      |

LAHY<sub>on</sub>NK

H2BY83

R.LAHYNK.R (+1) - Mod : 16.00 at Y(4) - Retention time : 9.38 min - Precursor m/z : 761.40 - Precursor int. : 32439.500 - Basepeak int. : 4458.100

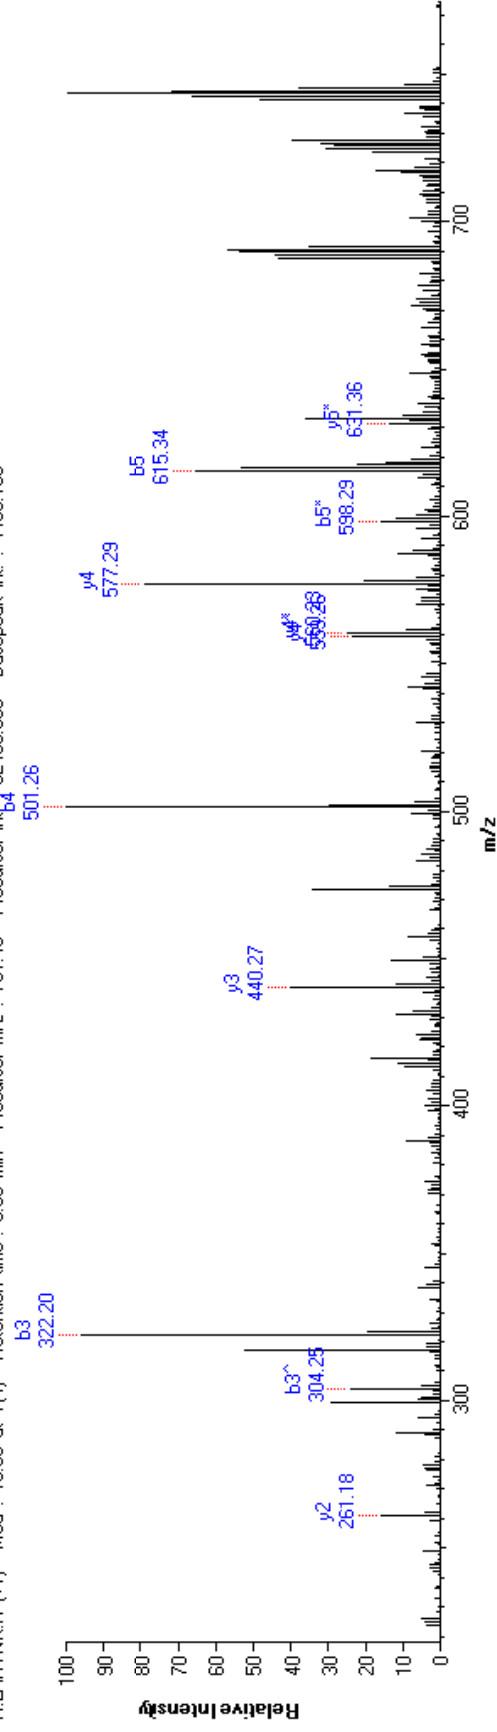

| [b] Seq (y) | b                       | b <sup>*</sup>          | b <sup>+</sup>          | y                       | y <sup>*</sup>          | y <sup>+</sup>          |
|-------------|-------------------------|-------------------------|-------------------------|-------------------------|-------------------------|-------------------------|
| 1 L 6       | 114.0919                | 97.0653                 | 96.0813                 | 761.3997                | 744.3732                | 743.3891                |
| 2 A 5       | 185.1290                | 168.1024                | 167.1184                | 648.3156                | 631.2891 <sup>***</sup> | 630.3051                |
| 3 H 4       | 322.1879 <sup>***</sup> | 305.1614                | 304.1773 <sup>***</sup> | 577.2785 <sup>***</sup> | 560.2520 <sup>***</sup> | 559.2679 <sup>***</sup> |
| 4 Y 3       | 501.2512 <sup>***</sup> | 484.2247                | 483.2407                | 440.2196 <sup>***</sup> | 423.1931                | 422.2090                |
| 5 N 2       | 615.2942 <sup>***</sup> | 598.2676 <sup>***</sup> | 597.2836                | 261.1563 <sup>***</sup> | 244.1297                | 243.1457                |
| 6 K 1       | 743.3891                | 726.3626                | 725.3785                | 147.1133                | 130.0868                | 129.1028                |

# LAHY<sub>oh</sub>NK

# H2BY83

MS/MS Fragmentation of **LAHY<sub>oh</sub>NK**

Found in **gi|1568551**, histone H2B [Homo sapiens]

Match to Query 496: 760.388404 from(381.201478,2+)

From data file HelHistoneH2A2B.dta

Click mouse within plot area to zoom in by factor of two about that poi

Or, Plot from  to  Da

| #        | b             | b <sup>++</sup> | b <sup>*</sup> | b <sup>++</sup> | Seq.     | y             | y <sup>++</sup> | y <sup>*</sup> | y <sup>++</sup> | #        |
|----------|---------------|-----------------|----------------|-----------------|----------|---------------|-----------------|----------------|-----------------|----------|
| <b>1</b> | 114.09        | 57.55           |                |                 | <b>L</b> |               |                 |                |                 | <b>6</b> |
| <b>2</b> | <b>185.13</b> | 93.07           |                |                 | <b>A</b> | <b>648.31</b> | 324.66          | <b>631.28</b>  | 316.15          | <b>5</b> |
| <b>3</b> | 322.19        | 161.60          |                |                 | <b>H</b> | <b>577.27</b> | <b>289.14</b>   | 560.25         | 280.63          | <b>4</b> |
| <b>4</b> | <b>501.25</b> | <b>251.13</b>   |                |                 | <b>Y</b> | <b>440.21</b> | 220.61          | 423.19         | 212.10          | <b>3</b> |
| <b>5</b> | <b>615.29</b> | 308.15          | 598.26         | 299.63          | <b>N</b> | <b>261.16</b> | 131.08          | 244.13         | 122.57          | <b>2</b> |
| <b>6</b> |               |                 |                |                 | <b>K</b> | <b>147.11</b> | 74.06           | 130.09         | 65.55           | <b>1</b> |

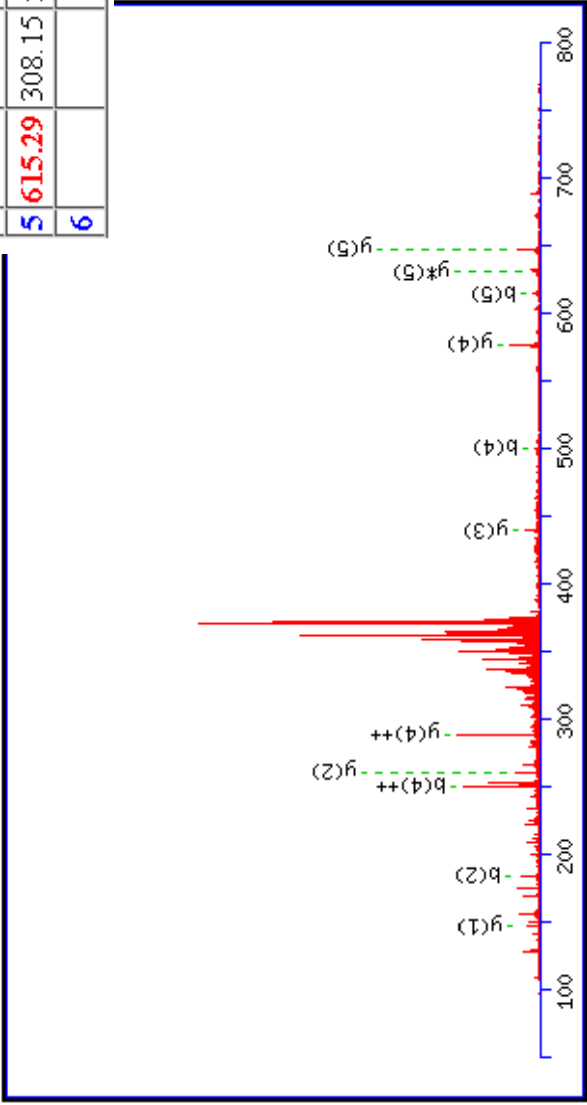

**Monoisotopic mass of neutral peptide Mr(calc): 760.39**

**Variable modifications:**

**Y4** : Hydroxylation (Y)

**Ions Score: 19 Expect: 0.91**

**Matches (Bold Red): 11/32** fragment ions using 49 most intense peaks

pr-LAHYNK<sub>pm</sub>

H2BK85

R.LAHYNK.R (+2) - Mod : 70.00 at K(6) - Retention time : 66.91 min - Precursor m/z : 436.24 - Precursor int. : 536944.000 - Basepeak int. : 4279510.000

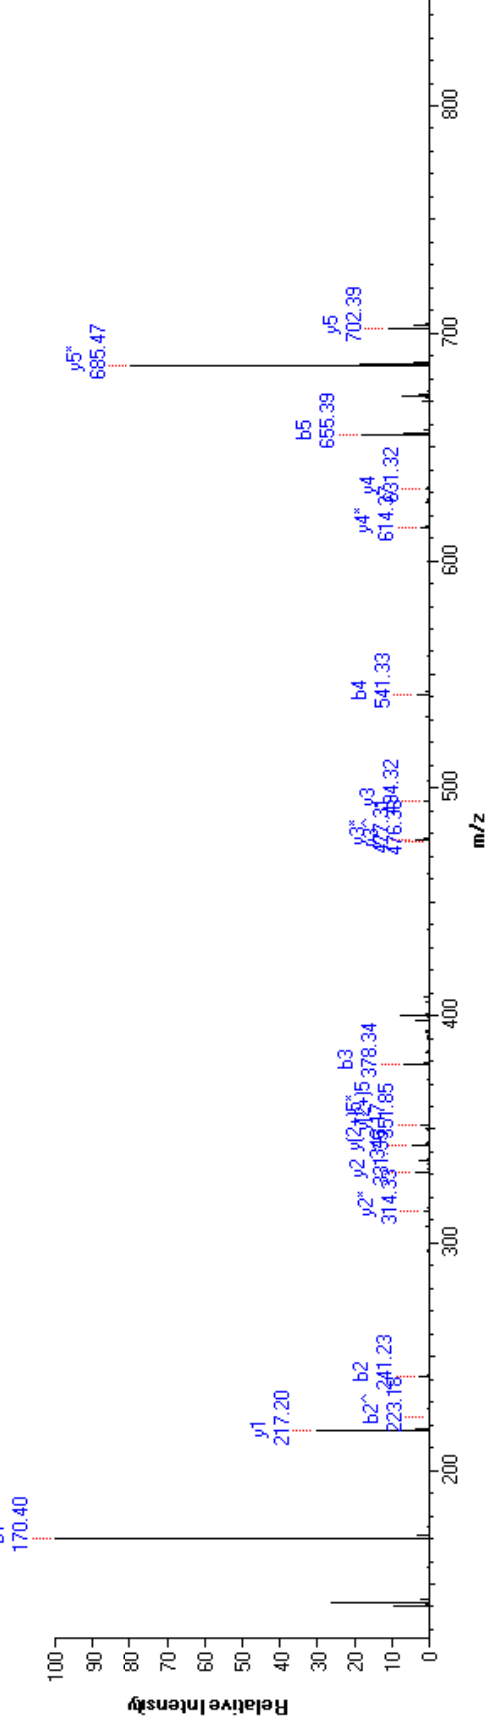

| [b] Seq [y] | b           | b <sup>+</sup> | b <sup>-</sup> | y           | y <sup>+</sup> | y <sup>-</sup> | b(2+)    | b(2+) <sup>+</sup> | b(2+) <sup>-</sup> | y(2+)       | y(2+) <sup>+</sup> | y(2+) <sup>-</sup> |
|-------------|-------------|----------------|----------------|-------------|----------------|----------------|----------|--------------------|--------------------|-------------|--------------------|--------------------|
| 1 L 6       | 170.0919 ** | 153.0653       | 152.0813       | 815.3997    | 798.3732       | 797.3891       | 0.0000   | 0.0000             | 0.0000             | 408.2038    | 399.6905           | 399.1985           |
| 2 A 5       | 241.1290 ** | 224.1024       | 223.1184 **    | 702.3156 ** | 685.2891 **    | 684.3051       | 0.0000   | 0.0000             | 0.0000             | 351.6617 ** | 343.1485 **        | 342.6564           |
| 3 H 4       | 378.1879 ** | 361.1614       | 360.1773       | 631.2785 ** | 614.2520 **    | 613.2679       | 0.0000   | 0.0000             | 0.0000             | 0.0000      | 0.0000             | 0.0000             |
| 4 Y 3       | 541.2512 ** | 524.2247       | 523.2407       | 494.2196 ** | 477.1931 **    | 476.2090 **    | 0.0000   | 0.0000             | 0.0000             | 0.0000      | 0.0000             | 0.0000             |
| 5 N 2       | 655.2942 ** | 638.2676       | 637.2836       | 331.1563 ** | 314.1297 **    | 313.1457       | 0.0000   | 0.0000             | 0.0000             | 0.0000      | 0.0000             | 0.0000             |
| 6 K 1       | 853.3891    | 836.3626       | 835.3785       | 217.1133 ** | 200.0868       | 199.1028       | 427.1985 | 418.6852           | 418.1932           | 0.0000      | 0.0000             | 0.0000             |

pr-ElQTAVR<sub>me1</sub>

H2BR99

R.ElQTAVR.L (+2) - Mod : 14.00 at R(7) - Retention time : 47.42 min - Precursor m/z : 443.75 - Precursor int. : 6006900.000 - Basepeak int. : 713805.000

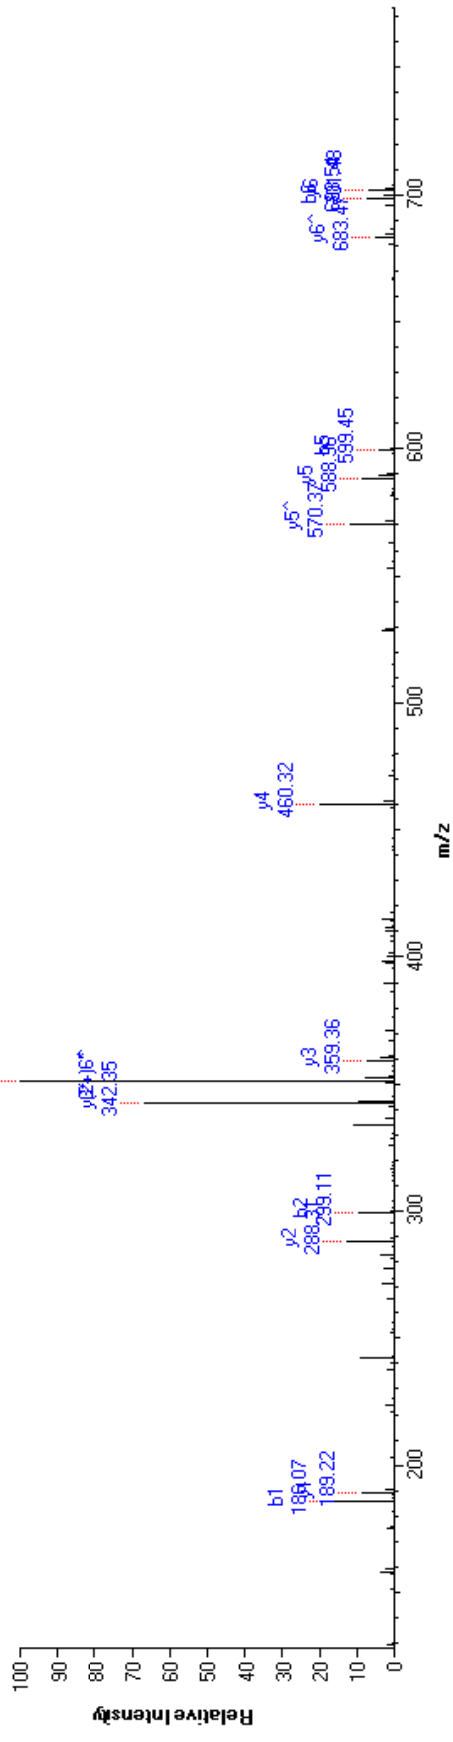

| [b] Seq [y] | b           | b <sup>+</sup> | b <sup>-</sup> | y           | y <sup>+</sup> | y <sup>-</sup> | b(2+)    | b(2+) <sup>+</sup> | b(2+) <sup>-</sup> | y(2+)       | y(2+) <sup>+</sup> | y(2+) <sup>-</sup> |
|-------------|-------------|----------------|----------------|-------------|----------------|----------------|----------|--------------------|--------------------|-------------|--------------------|--------------------|
| 1 E 7       | 186.0504 ** | 169.0239       | 168.0399       | 830.4579    | 813.4314       | 812.4474       | 0.0000   | 0.0000             | 0.0000             | 415.7329    | 407.2196           | 406.7276           |
| 2 I 6       | 299.1345 ** | 282.1079       | 281.1239       | 701.4153 ** | 684.3888       | 683.4048 **    | 0.0000   | 0.0000             | 0.0000             | 351.2116 ** | 342.6983 **        | 342.2063 **        |
| 3 Q 5       | 427.1931    | 410.1665       | 409.1825       | 588.3313 ** | 571.3047       | 570.3207 **    | 0.0000   | 0.0000             | 0.0000             | 0.0000      | 0.0000             | 0.0000             |
| 4 T 4       | 528.2407    | 511.2142       | 510.2302       | 460.2727 ** | 443.2462       | 442.2621       | 0.0000   | 0.0000             | 0.0000             | 0.0000      | 0.0000             | 0.0000             |
| 5 A 3       | 599.2778 ** | 582.2513       | 581.2673       | 359.2250 ** | 342.1985 **    | 341.2144       | 0.0000   | 0.0000             | 0.0000             | 0.0000      | 0.0000             | 0.0000             |
| 6 V 2       | 698.3463 ** | 681.3197       | 680.3357       | 288.1879 ** | 271.1614       | 270.1773       | 0.0000   | 0.0000             | 0.0000             | 0.0000      | 0.0000             | 0.0000             |
| 7 R 1       | 868.4474    | 851.4208       | 850.4368       | 189.1195 ** | 172.0930       | 171.1089       | 434.7276 | 426.2143           | 425.7223           | 0.0000      | 0.0000             | 0.0000             |

LLLPGELAK<sub>fo</sub>

H2BK108

R.LLLPGELAK.H (+2) - Mod : 28.00 at K(9) - Retention time : 66.35 min - Precursor m/z : 491.30 - Precursor int. : 3573880.000 - Basepeak int. : 456234.000

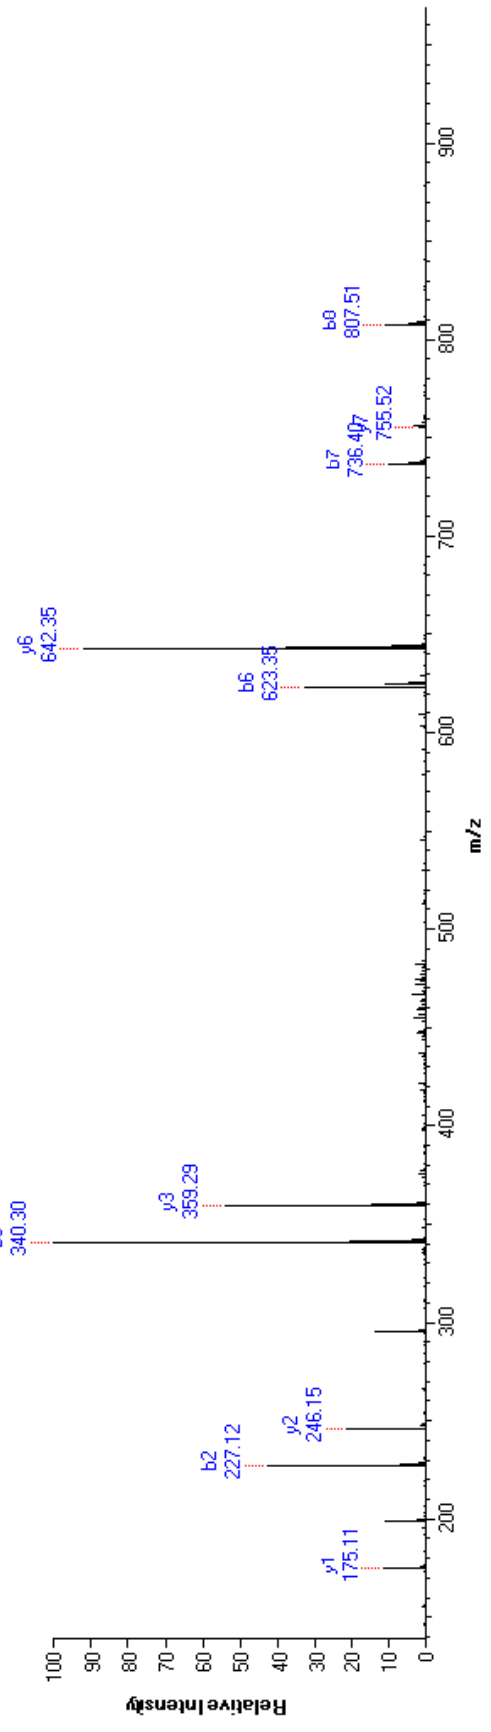

| (b) Seq (y) | b                      | b <sup>+</sup> | b <sup>+</sup> | y                      | y <sup>+</sup> | y <sup>+</sup> | y <sup>+</sup> | b(2+) <sup>+</sup> | b(2+) <sup>+</sup> | y(2+)    | y(2+) <sup>+</sup> | y(2+) <sup>+</sup> |
|-------------|------------------------|----------------|----------------|------------------------|----------------|----------------|----------------|--------------------|--------------------|----------|--------------------|--------------------|
| 1 L 9       | 114.0919               | 97.0653        | 96.0813        | 981.6035               | 964.5770       | 963.5930       | 0.0000         | 0.0000             | 0.0000             | 491.3057 | 482.7924           | 482.3004           |
| 2 L 8       | 227.1759 <sup>xx</sup> | 210.1494       | 209.1654       | 868.5195               | 851.4929       | 850.5089       | 0.0000         | 0.0000             | 0.0000             | 434.7536 | 426.2504           | 425.7584           |
| 3 L 7       | 340.2600 <sup>xx</sup> | 323.2335       | 322.2495       | 755.4354 <sup>xx</sup> | 738.4089       | 737.4248       | 0.0000         | 0.0000             | 0.0000             | 378.2216 | 369.7083           | 369.2163           |
| 4 P 6       | 437.3128               | 420.2862       | 419.3022       | 642.3513 <sup>xx</sup> | 625.3248       | 624.3408       | 0.0000         | 0.0000             | 0.0000             | 321.6796 | 0.0000             | 0.0000             |
| 5 G 5       | 494.3342               | 477.3077       | 476.3237       | 545.2986               | 528.2720       | 527.2880       | 0.0000         | 0.0000             | 0.0000             | 0.0000   | 0.0000             | 0.0000             |
| 6 E 4       | 623.3768 <sup>xx</sup> | 606.3503       | 605.3663       | 488.2771               | 471.2506       | 470.2665       | 0.0000         | 0.0000             | 0.0000             | 0.0000   | 0.0000             | 0.0000             |
| 7 L 3       | 736.4609 <sup>xx</sup> | 719.4343       | 718.4503       | 359.2345 <sup>xx</sup> | 342.2080       | 341.2240       | 0.0000         | 0.0000             | 0.0000             | 0.0000   | 0.0000             | 0.0000             |
| 8 A 2       | 807.4980 <sup>xx</sup> | 790.4714       | 789.4874       | 246.1505 <sup>xx</sup> | 229.1239       | 228.1399       | 0.0000         | 0.0000             | 0.0000             | 0.0000   | 0.0000             | 0.0000             |
| 9 K 1       | 963.5930               | 946.5664       | 945.5824       | 175.1133 <sup>xx</sup> | 158.0868       | 157.1028       | 482.3004       | 473.7871           | 473.2951           | 0.0000   | 0.0000             | 0.0000             |

# LLLPGELAK<sub>f0</sub>HAVSEGTK

# H2BK108

MS/MS Fragmentation of **LLLPGELAKHAVSEGTK**  
Found in **gi|568551**, histone H2B [Homo sapiens]

Match to Query 31002: 1789.994784 from(896.004668,2+)  
From data file D:\Lee\Histone\_nonpro\_Feb2010\DTAs\Non-prop\histone

Click mouse within plot area to zoom in by factor of two about that point  
Or, Plot from  to  Da

| #  | b       | b <sup>++</sup> | b <sup>*</sup> | b <sup>++</sup> | b <sup>0</sup> | b <sup>0++</sup> | Seq. | y       | y <sup>++</sup> | y <sup>*</sup> | y <sup>++</sup> | y <sup>0</sup> | y <sup>0++</sup> | #  |
|----|---------|-----------------|----------------|-----------------|----------------|------------------|------|---------|-----------------|----------------|-----------------|----------------|------------------|----|
| 1  | 114.09  | 57.55           |                |                 |                |                  | L    |         |                 |                |                 |                |                  | 17 |
| 2  | 227.18  | 114.09          |                |                 |                |                  | L    | 1677.95 | 839.48          | 1660.93        | 830.97          | 1659.94        | 830.48           | 16 |
| 3  | 340.26  | 170.63          |                |                 |                |                  | L    | 1564.87 | 782.94          | 1547.84        | 774.43          | 1546.86        | 773.93           | 15 |
| 4  | 437.31  | 219.16          |                |                 |                |                  | P    | 1451.79 | 726.40          | 1434.76        | 717.88          | 1433.77        | 717.39           | 14 |
| 5  | 494.33  | 247.67          |                |                 |                |                  | G    | 1354.73 | 677.87          | 1337.71        | 669.36          | 1336.72        | 668.86           | 13 |
| 6  | 623.38  | 312.19          |                |                 | 605.37         | 303.19           | E    | 1297.71 | 649.36          | 1280.68        | 640.85          | 1279.70        | 640.35           | 12 |
| 7  | 736.46  | 368.73          |                |                 | 718.45         | 359.73           | L    | 1168.67 | 584.84          | 1151.64        | 576.32          | 1150.66        | 575.83           | 11 |
| 8  | 807.50  | 404.25          |                |                 | 789.49         | 395.25           | A    | 1055.58 | 528.30          | 1038.56        | 519.78          | 1037.57        | 519.29           | 10 |
| 9  | 963.62  | 482.32          | 946.60         | 473.80          | 945.61         | 473.31           | K    | 984.55  | 492.78          | 967.52         | 484.26          | 966.54         | 483.77           | 9  |
| 10 | 1100.68 | 550.84          | 1083.66        | 542.33          | 1082.67        | 541.84           | H    | 828.42  | 414.71          | 811.39         | 406.20          | 810.41         | 405.71           | 8  |
| 11 | 1171.72 | 586.36          | 1154.69        | 577.85          | 1153.71        | 577.36           | A    | 691.36  | 346.18          | 674.34         | 337.67          | 673.35         | 337.18           | 7  |
| 12 | 1270.79 | 635.90          | 1253.76        | 627.38          | 1252.78        | 626.89           | V    | 620.32  | 310.67          | 603.30         | 302.15          | 602.31         | 301.66           | 6  |
| 13 | 1357.82 | 679.41          | 1340.79        | 670.90          | 1339.81        | 670.41           | S    | 521.26  | 261.13          | 504.23         | 252.62          | 503.25         | 252.13           | 5  |
| 14 | 1486.86 | 743.94          | 1469.84        | 735.42          | 1468.85        | 734.93           | E    | 434.22  | 217.62          | 417.20         | 209.10          | 416.21         | 208.61           | 4  |
| 15 | 1543.88 | 772.45          | 1526.86        | 763.93          | 1525.87        | 763.44           | G    | 305.18  | 153.09          | 288.16         | 144.58          | 287.17         | 144.09           | 3  |
| 16 | 1644.93 | 822.97          | 1627.91        | 814.46          | 1626.92        | 813.96           | T    | 248.16  | 124.58          | 231.13         | 116.07          | 230.15         | 115.58           | 2  |
| 17 |         |                 |                |                 |                |                  | K    | 147.11  | 74.06           | 130.09         | 65.55           |                |                  | 1  |

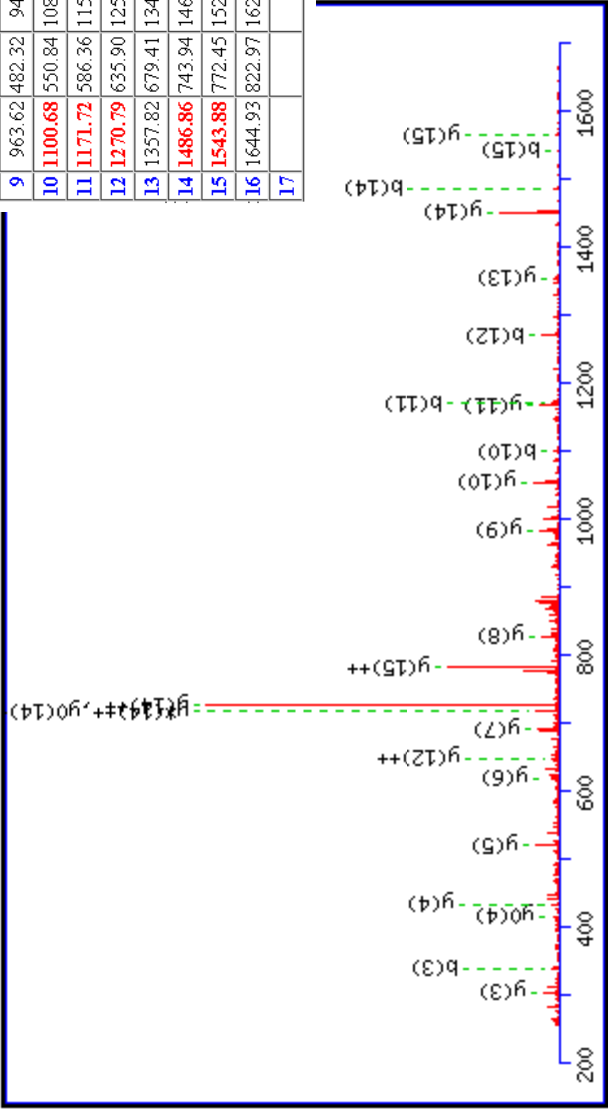

Monoisotopic mass of neutral peptide Mr(calc): 1790.03  
Variable modifications:  
K9 : Dimethyl1 (K)  
Ions Score: 66 Expect: 8.1e-005  
Matches (**Bold Red**): 24/164 fragment ions using 60 most intense peaks

# LLLPGELAK<sub>f0</sub>HAVSEGTK

# H2BK108

MS/MS Fragmentation of **LLLPGELAKHAVSEGTK**  
Found in **gi|1568551**, histone H2B [Homo sapiens]

Match to Query 28802: 1789.990884 from(896.002718,2+)  
From data file HelaHistoneH2A2B.dta

Click mouse within plot area to zoom in by factor of two about that point  
Or, Plot from  to  Da

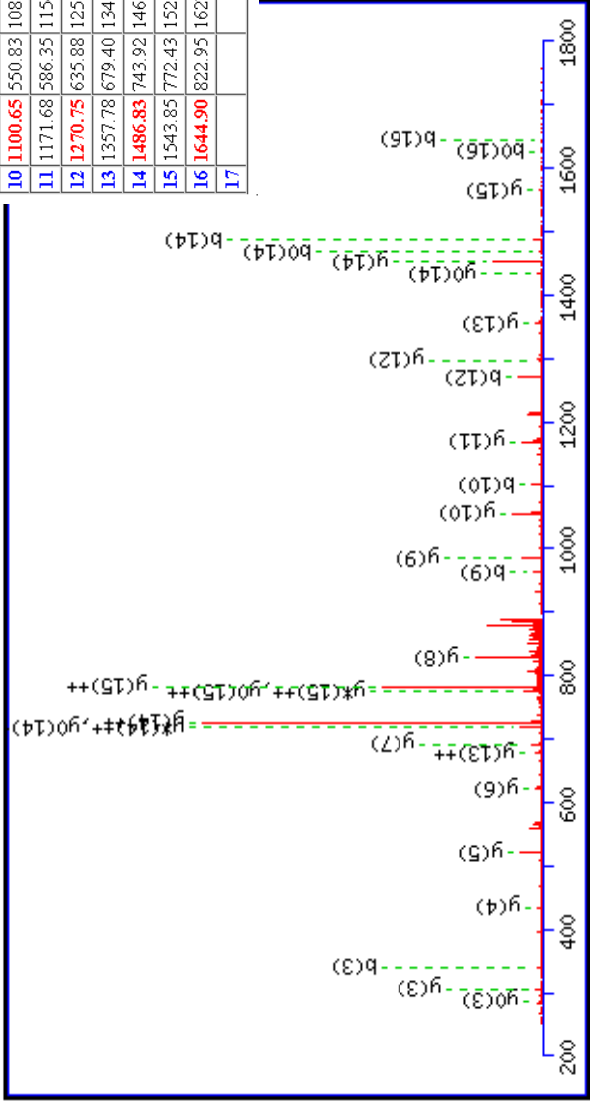

Monoisotopic mass of neutral peptide Mr(calc): 1789.99

Variable modifications:

K9 : Formyl (K)

Ions Score: 79 Expect: 8e-006

Matches (**Bold Red**): 30/164 fragment ions using 64 most intense peaks

| #  | b              | b <sup>++</sup> | b <sup>+</sup> | b <sup>++</sup> | b <sup>0</sup> | b <sup>++</sup> | Seq. | y              | y <sup>++</sup> | y <sup>+</sup> | y <sup>++</sup> | y <sup>0</sup> | y <sup>++</sup> | #  |
|----|----------------|-----------------|----------------|-----------------|----------------|-----------------|------|----------------|-----------------|----------------|-----------------|----------------|-----------------|----|
| 1  | 114.09         | 57.55           |                |                 |                |                 | L    |                |                 |                |                 |                |                 | 17 |
| 2  | 227.18         | 114.09          |                |                 |                |                 | L    | 1677.92        | 839.46          | 1660.89        | 830.95          | 1659.91        | 830.46          | 16 |
| 3  | <b>340.26</b>  | 170.63          |                |                 |                |                 | L    | <b>1564.83</b> | <b>782.92</b>   | 1547.81        | <b>774.41</b>   | 1546.82        | <b>773.91</b>   | 15 |
| 4  | 437.31         | 219.16          |                |                 |                |                 | P    | <b>1451.75</b> | <b>726.38</b>   | 1434.72        | <b>717.86</b>   | <b>1433.74</b> | <b>717.37</b>   | 14 |
| 5  | 494.33         | 247.67          |                |                 |                |                 | G    | <b>1354.70</b> | <b>677.85</b>   | 1337.67        | 669.34          | 1336.69        | 668.85          | 13 |
| 6  | 623.38         | 312.19          |                |                 | 605.37         | 303.19          | E    | <b>1297.67</b> | 649.34          | 1280.65        | 640.83          | 1279.66        | 640.34          | 12 |
| 7  | 736.46         | 368.73          |                |                 | 718.45         | 359.73          | L    | <b>1168.63</b> | 584.82          | 1151.61        | 576.31          | 1150.62        | 575.81          | 11 |
| 8  | 807.50         | 404.25          |                |                 | 789.49         | 395.25          | A    | <b>1055.55</b> | 528.28          | 1038.52        | 519.76          | 1037.54        | 519.27          | 10 |
| 9  | <b>963.59</b>  | 482.30          | 946.56         | 473.78          | 945.58         | 473.39          | K    | <b>984.51</b>  | 492.76          | 967.48         | 484.25          | 966.50         | 483.75          | 9  |
| 10 | <b>1100.65</b> | 550.83          | 1083.62        | 542.31          | 1082.64        | 541.82          | H    | <b>828.42</b>  | 414.71          | 811.39         | 406.20          | 810.41         | 405.71          | 8  |
| 11 | 1171.68        | 586.35          | 1154.66        | 577.83          | 1153.67        | 577.34          | A    | <b>691.36</b>  | 346.18          | 674.34         | 337.67          | 673.35         | 337.18          | 7  |
| 12 | <b>1270.75</b> | 635.88          | 1253.73        | 627.37          | 1252.74        | 626.87          | V    | <b>620.32</b>  | 310.67          | 603.30         | 302.15          | 602.31         | 301.66          | 6  |
| 13 | 1357.78        | 679.40          | 1340.76        | 670.88          | 1339.77        | 670.39          | S    | <b>521.26</b>  | 261.13          | 504.23         | 252.62          | 503.25         | 252.13          | 5  |
| 14 | <b>1486.83</b> | 743.92          | 1469.80        | 735.40          | <b>1468.82</b> | 734.91          | E    | <b>434.22</b>  | 217.62          | 417.20         | 209.10          | 416.21         | 208.61          | 4  |
| 15 | 1543.85        | 772.43          | 1526.82        | 763.91          | 1525.84        | 763.42          | G    | <b>305.18</b>  | 153.09          | 288.16         | 144.58          | <b>287.17</b>  | 144.09          | 3  |
| 16 | <b>1644.90</b> | 822.95          | 1627.87        | 814.44          | <b>1626.88</b> | 813.95          | T    | 248.16         | 124.58          | 231.13         | 116.07          | 230.15         | 115.58          | 2  |
| 17 |                |                 |                |                 |                |                 | K    | 147.11         | 74.06           | 130.09         | 65.55           |                |                 | 1  |

# pr-HAVSEGTK<sub>pm</sub> H2BK116

K.HAVSEGTK.A (+2) - Mod : 70.00 at K(8) - Retention time : 44.55 min - Precursor m/z : 477.75 - Precursor int. : 18022800.000 - Basepeak int. : 3575510.000

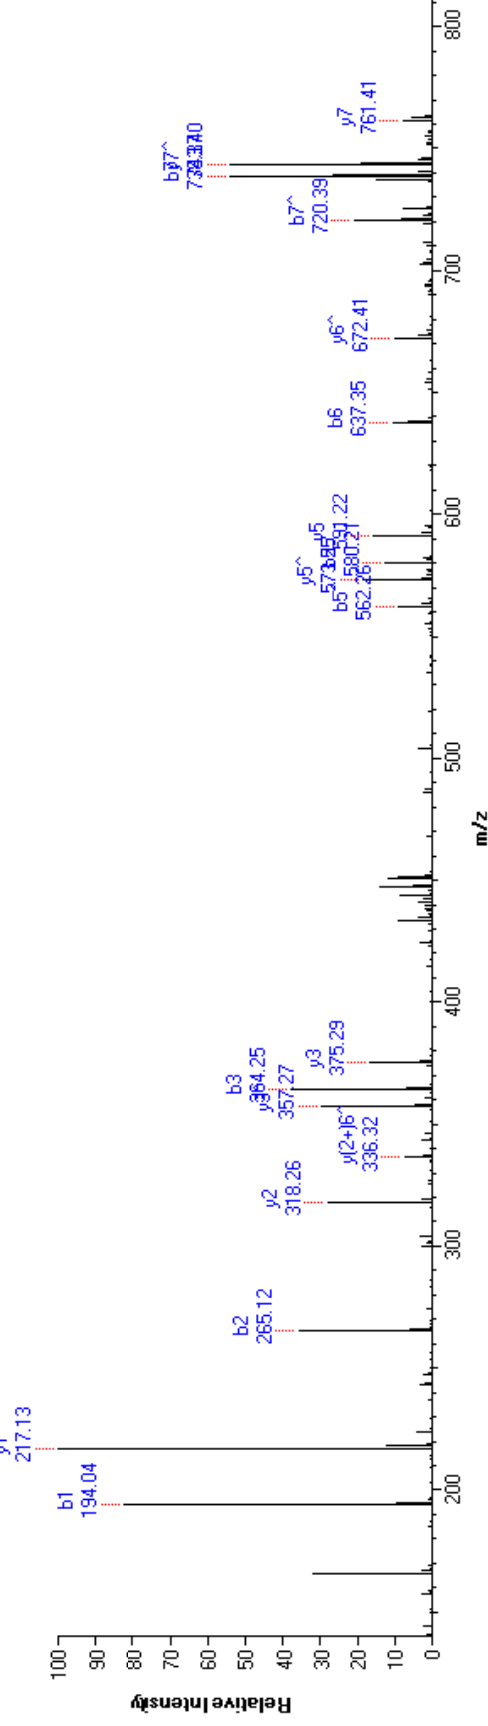

| [b] Seq (y) | b           | b <sup>+</sup> | y           | y <sup>+</sup> | y <sup>+</sup> | b(2+)    | b(2+) <sup>+</sup> | y(2+)    | y(2+) <sup>+</sup> |
|-------------|-------------|----------------|-------------|----------------|----------------|----------|--------------------|----------|--------------------|
| 1 H 8       | 194.0667 ** | 177.0402       | 898.4215    | 881.3950       | 880.4109       | 0.0000   | 0.0000             | 449.7147 | 441.2014           |
| 2 A 7       | 265.1039 ** | 247.0933       | 761.3626 ** | 744.3361       | 743.3521 **    | 0.0000   | 0.0000             | 381.1852 | 372.6720           |
| 3 V 6       | 364.1722 ** | 347.1457       | 630.3255    | 673.2990       | 672.3149 **    | 0.0000   | 0.0000             | 345.6667 | 337.1534           |
| 4 S 5       | 451.2043    | 434.1777       | 591.2571 ** | 574.2306       | 573.2465 **    | 0.0000   | 0.0000             | 0.0000   | 0.0000             |
| 5 E 4       | 580.2469 ** | 563.2203       | 504.2251    | 487.1985       | 486.2145       | 0.0000   | 0.0000             | 0.0000   | 0.0000             |
| 6 G 3       | 637.2683 ** | 620.2418       | 375.1825 ** | 358.1559       | 357.1719 **    | 319.1381 | 310.6248           | 0.0000   | 0.0000             |
| 7 T 2       | 738.3160 ** | 721.2895       | 318.1610 ** | 301.1345       | 300.1505       | 369.6619 | 361.1487           | 0.0000   | 0.0000             |
| 8 K 1       | 936.4109    | 919.3845       | 217.1133 ** | 200.0868       | 199.1028       | 468.7094 | 450.1961           | 0.0000   | 0.0000             |

pr-HAVSEGTK<sub>fo</sub>AVTK<sub>pr</sub>

H2BK116

K.HAVSEGTKAVTK(+56)Y (+1) - Mod : 28.00 at K(8) - Retention time : 51.22 min - Precursor m/z : 1367.72 - Precursor int. : 243104.000 - Basepeak int. : 6596.910

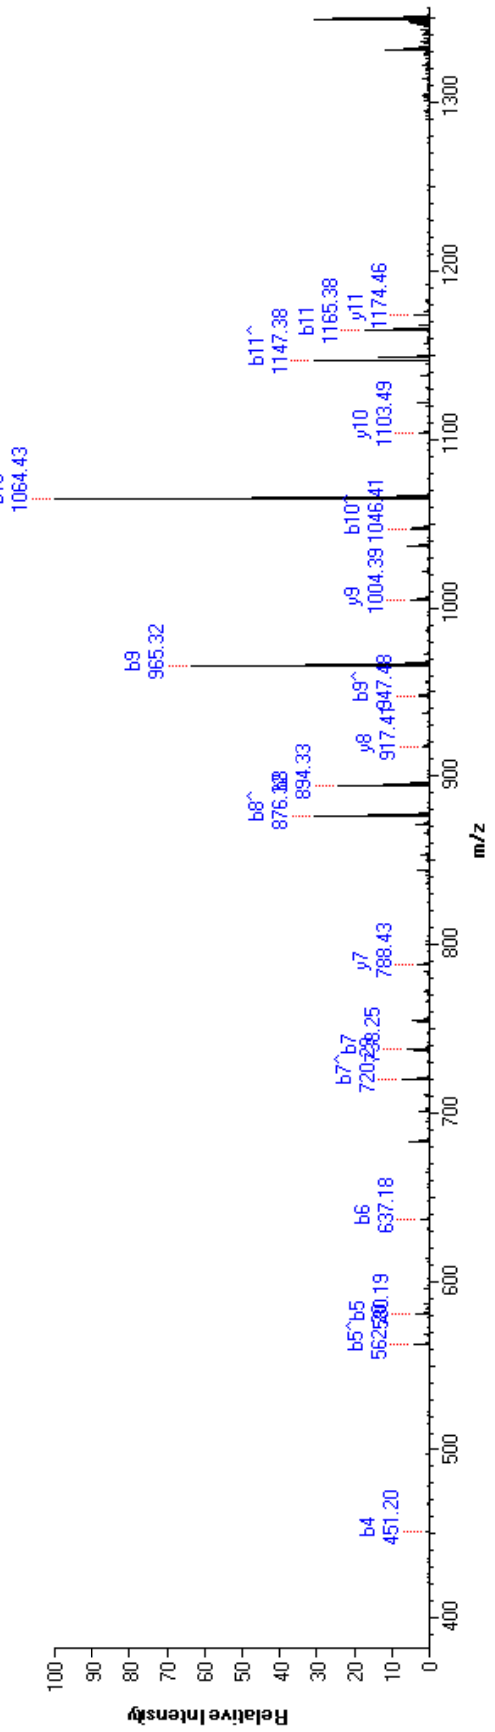

| (b) Seq (y) | b            | b*        | b^           | y            | y*        | y^        |
|-------------|--------------|-----------|--------------|--------------|-----------|-----------|
| 1 H 12      | 194.0667     | 177.0402  | 176.0562     | 1311.6697    | 1294.6432 | 1293.6592 |
| 2 A 11      | 265.1039     | 248.0773  | 247.0933     | 1174.6108 ** | 1157.5842 | 1156.6002 |
| 3 V 10      | 364.1722     | 347.1457  | 346.1617     | 1103.5737 ** | 1086.5471 | 1085.5631 |
| 4 S 9       | 451.2043 **  | 434.1777  | 433.1937     | 1004.5052 ** | 987.4787  | 986.4947  |
| 5 E 8       | 580.2469 **  | 563.2203  | 562.2363 **  | 917.4732 **  | 900.4467  | 899.4626  |
| 6 G 7       | 637.2683 **  | 620.2418  | 619.2578     | 788.4307 **  | 771.4041  | 770.4201  |
| 7 T 6       | 738.3160 **  | 721.2895  | 720.3055 **  | 731.4092     | 714.3826  | 713.3986  |
| 8 K 5       | 894.4109 **  | 877.3845  | 876.4004 **  | 630.3615     | 613.3350  | 612.3510  |
| 9 A 4       | 965.4481 **  | 948.4216  | 947.4375 **  | 474.2665     | 457.2400  | 456.2560  |
| 10 V 3      | 1064.5165 ** | 1047.4900 | 1046.5060 ** | 403.2294     | 386.2029  | 385.2189  |
| 11 T 2      | 1165.5642 ** | 1148.5376 | 1147.5536 ** | 304.1610     | 287.1345  | 286.1505  |
| 12 K 1      | 1349.6592    | 1332.6326 | 1331.6486    | 203.1133     | 186.0868  | 185.1028  |

HAVSEGTK<sub>f</sub>AVTK

H2BK116

K.HAVSEGTKAVTK.Y (+2) - Mod : 28.00 at K(8) - Retention time : 16.92 min - Precursor m/z : 628.34 - Precursor int. : 32647.500 - Basepeak int. : 2816.710

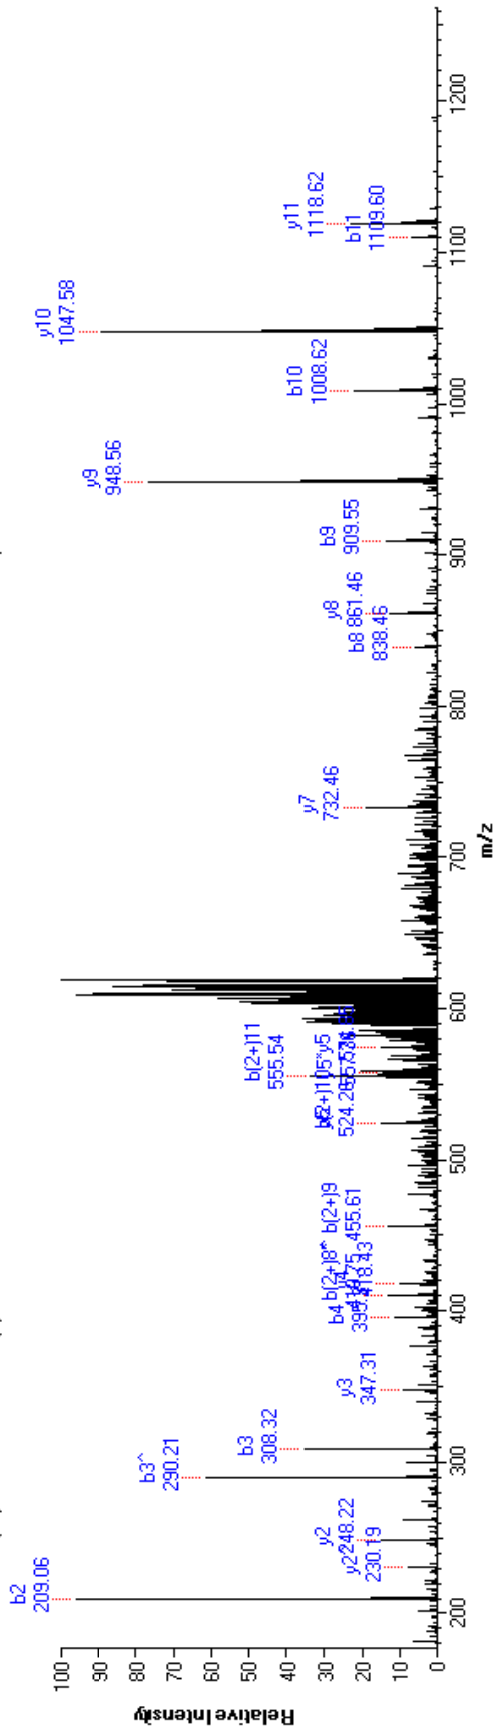

| (b) Seq (y) | b                        | b <sup>+</sup> | b <sup>+</sup>          | y                        | y <sup>+</sup>          | y <sup>+</sup>          | b(2+)                   | b(2+) <sup>+</sup>      | b(2+) <sup>+</sup>      | y(2+)                   | y(2+) <sup>+</sup> | y(2+) <sup>+</sup> |
|-------------|--------------------------|----------------|-------------------------|--------------------------|-------------------------|-------------------------|-------------------------|-------------------------|-------------------------|-------------------------|--------------------|--------------------|
| 1 H 12      | 138.0667                 | 121.0402       | 120.0562                | 1255.6697                | 1238.6432               | 1237.6592               | 0.0000                  | 0.0000                  | 0.0000                  | 628.3387                | 619.8255           | 619.3335           |
| 2 A 11      | 209.1039 <sup>***</sup>  | 192.0773       | 191.0933                | 1118.6108 <sup>***</sup> | 1101.5842               | 1100.6002               | 0.0000                  | 0.0000                  | 0.0000                  | 559.8093                | 551.2960           | 550.8040           |
| 3 V 10      | 308.1722 <sup>***</sup>  | 291.1457       | 290.1617 <sup>***</sup> | 1047.5737 <sup>***</sup> | 1030.5471               | 1029.5631               | 0.0000                  | 0.0000                  | 0.0000                  | 524.2908 <sup>***</sup> | 515.7775           | 515.2855           |
| 4 S 9       | 395.2043 <sup>***</sup>  | 378.1777       | 377.1937                | 948.5052 <sup>***</sup>  | 931.4787                | 930.4947                | 0.0000                  | 0.0000                  | 0.0000                  | 474.7565                | 466.2433           | 465.7513           |
| 5 E 8       | 524.2469 <sup>***</sup>  | 507.2203       | 506.2363                | 861.4732 <sup>***</sup>  | 844.4467                | 843.4626                | 0.0000                  | 0.0000                  | 0.0000                  | 431.2405                | 422.7273           | 422.2353           |
| 6 G 7       | 581.2683                 | 564.2418       | 563.2578                | 732.4307 <sup>***</sup>  | 715.4041                | 714.4201                | 0.0000                  | 0.0000                  | 0.0000                  | 366.7192                | 358.2060           | 357.7140           |
| 7 T 6       | 682.3160                 | 665.2895       | 664.3055                | 675.4092                 | 658.3826                | 657.3986                | 341.6619                | 333.1487                | 332.6566                | 338.2085                | 329.6952           | 329.2032           |
| 8 K 5       | 838.4109 <sup>***</sup>  | 821.3845       | 820.4004                | 574.3615 <sup>***</sup>  | 557.3350 <sup>***</sup> | 556.3510                | 419.7094                | 411.1961 <sup>***</sup> | 410.7041 <sup>***</sup> | 0.0000                  | 0.0000             | 0.0000             |
| 9 A 4       | 909.4481 <sup>***</sup>  | 892.4216       | 891.4375                | 418.2665 <sup>***</sup>  | 401.2400                | 400.2560                | 455.2280 <sup>***</sup> | 446.7147                | 446.2227                | 0.0000                  | 0.0000             | 0.0000             |
| 10 V 3      | 1008.5165 <sup>***</sup> | 991.4899       | 990.5059                | 347.2294 <sup>***</sup>  | 330.2029                | 329.2189                | 504.7621                | 496.2489                | 495.7569                | 0.0000                  | 0.0000             | 0.0000             |
| 11 T 2      | 1109.5642 <sup>***</sup> | 1092.5376      | 1091.5536               | 248.1610 <sup>***</sup>  | 231.1345                | 230.1505 <sup>***</sup> | 555.2860 <sup>***</sup> | 546.7727                | 546.2807                | 0.0000                  | 0.0000             | 0.0000             |
| 12 K 1      | 1237.6592                | 1220.6326      | 1219.6486               | 147.1133                 | 130.0868                | 129.1028                | 619.3335                | 610.8202                | 610.3282                | 0.0000                  | 0.0000             | 0.0000             |



AVTK<sub>f0</sub>YTSSK

H2BK120

K.AVTKYTSSK.<sup>+</sup>(+2) - Mod : 28.00 at K(4) - Retention time : 30.43 min - Precursor m/z : 506.77 - Precursor int. : 368439.000 - Basepeak int. : 290435.000

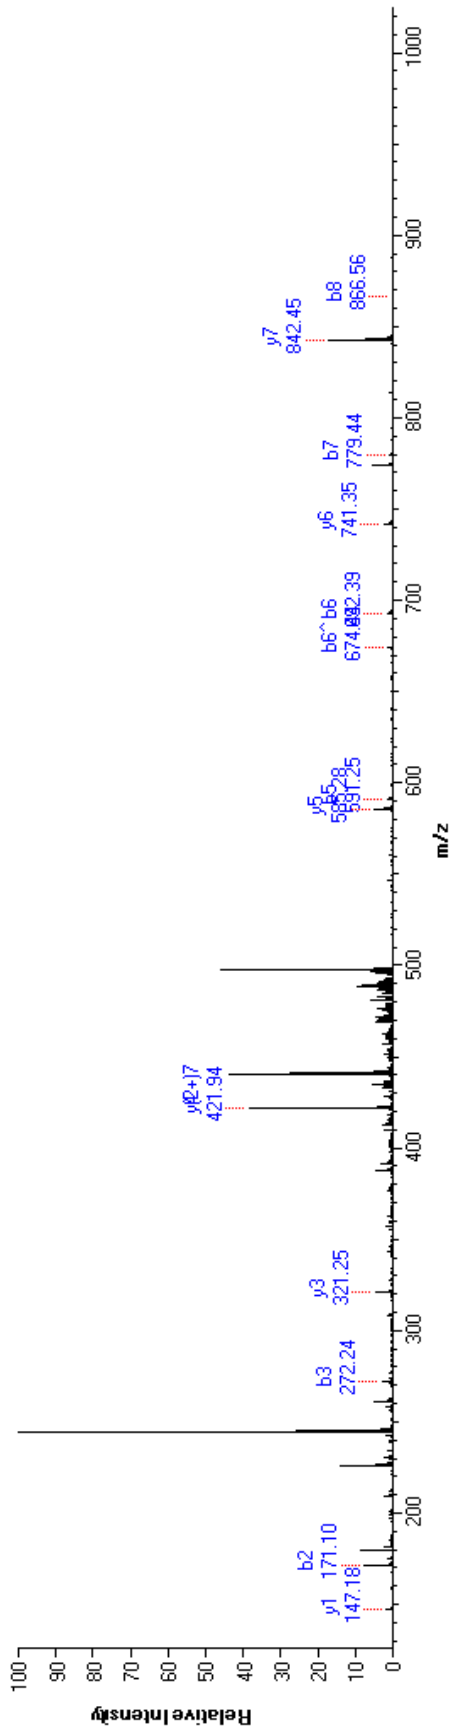

| [b] Seq [v] | b           | b <sup>+</sup> | b <sup>+</sup> | y           | y <sup>+</sup> | y <sup>+</sup> | y <sup>+</sup> | b(2 <sup>+</sup> ) | b(2 <sup>+</sup> ) | y(2 <sup>+</sup> ) | y(2 <sup>+</sup> ) |
|-------------|-------------|----------------|----------------|-------------|----------------|----------------|----------------|--------------------|--------------------|--------------------|--------------------|
| 1 A 9       | 72.0449     | 55.0184        | 54.0344        | 1012.5366   | 995.5100       | 994.5260       | 994.5260       | 0.0000             | 0.0000             | 506.7722           | 498.2589           |
| 2 V 8       | 171.1133 ** | 154.0868       | 153.1028       | 941.4995    | 924.4729       | 923.4889       | 923.4889       | 0.0000             | 0.0000             | 471.2536           | 462.7404           |
| 3 T 7       | 272.1610 ** | 255.1345       | 254.1505       | 842.4310 ** | 825.4045       | 824.4205       | 824.4205       | 0.0000             | 0.0000             | 421.7195 **        | 412.7142           |
| 4 K 6       | 428.2560    | 411.2294       | 410.2454       | 741.3834 ** | 724.3568       | 723.3728       | 723.3728       | 0.0000             | 0.0000             | 371.1956           | 362.6823           |
| 5 Y 5       | 591.3193 ** | 574.2928       | 573.3088       | 585.2884 ** | 568.2619       | 567.2778       | 567.2778       | 0.0000             | 0.0000             | 0.0000             | 0.0000             |
| 6 T 4       | 692.3670 ** | 675.3405       | 674.3564 **    | 422.2251 ** | 405.1985       | 404.2145       | 404.2145       | 337.6821           | 337.6821           | 0.0000             | 0.0000             |
| 7 S 3       | 779.3990 ** | 762.3725       | 761.3885       | 321.1774 ** | 304.1509       | 303.1668       | 303.1668       | 381.6902           | 381.6902           | 0.0000             | 0.0000             |
| 8 S 2       | 866.4310 ** | 849.4045       | 848.4205       | 234.1454    | 217.1188       | 216.1348       | 216.1348       | 425.2062           | 425.2062           | 0.0000             | 0.0000             |
| 9 K 1       | 994.5260    | 977.4995       | 976.5154       | 147.1133 ** | 130.0868       | 129.1028       | 129.1028       | 488.7516           | 488.7516           | 0.0000             | 0.0000             |

pr-TK<sub>pm</sub>QTAR

H3K4

R.TK(+70)QTAR.K (+2) - Mod : 0.07 at 0(-1) - Retention time : 40.42 min.- Precursor m/z : 415.74 - Precursor int. : 100438.000 - Basepeak int. : 67537.100

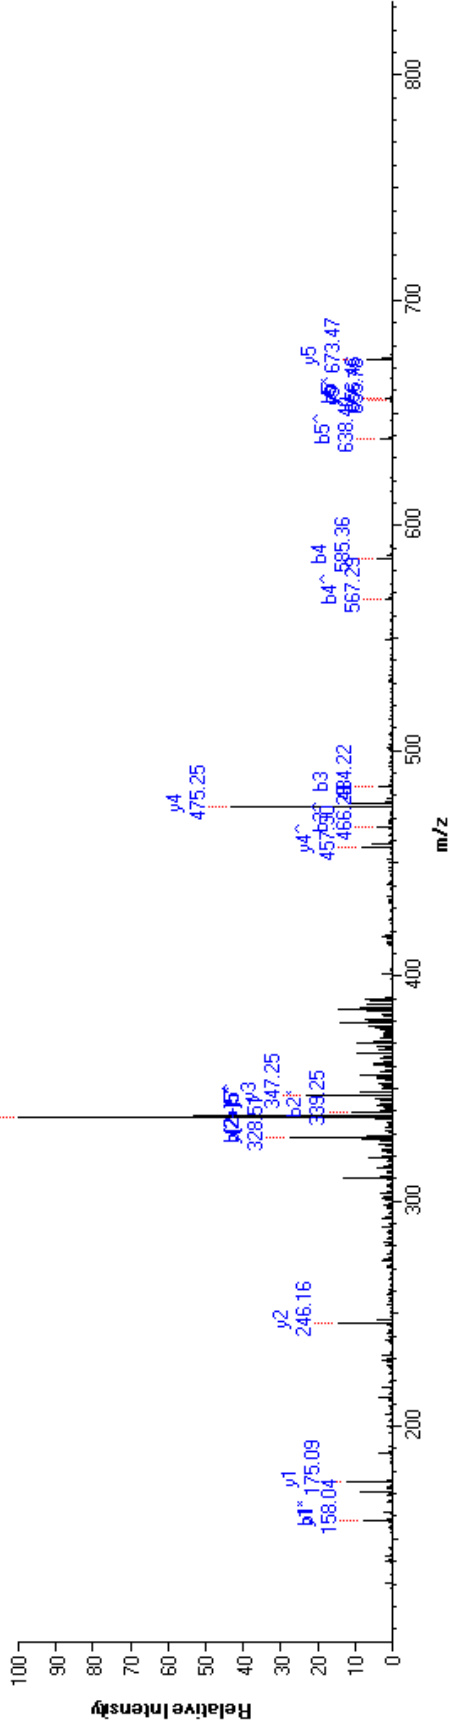

| (b) Seq (y) | b           | b*          | b^          | y           | y*          | y^          | b(2+)       | b(2+)*   | b(2+)^   | y(2+)       | y(2+)*      | y(2+)^      |
|-------------|-------------|-------------|-------------|-------------|-------------|-------------|-------------|----------|----------|-------------|-------------|-------------|
| 1 T 6       | 158.0555 ** | 141.0290    | 140.0449    | 774.4055    | 757.3790    | 756.3950    | 0.0000      | 0.0000   | 0.0000   | 387.7067    | 379.1934    | 378.7014    |
| 2 K 5       | 356.1505    | 339.1239 ** | 338.1399    | 673.3578 ** | 656.3313 ** | 655.3473 ** | 0.0000      | 0.0000   | 0.0000   | 337.1828 ** | 328.6696 ** | 328.1776 ** |
| 3 Q 4       | 484.2090 ** | 467.1825    | 466.1985 ** | 475.2529 ** | 458.2363    | 457.2523 ** | 0.0000      | 0.0000   | 0.0000   | 0.0000      | 0.0000      | 0.0000      |
| 4 T 3       | 585.2567 ** | 568.2302    | 567.2462 ** | 347.2043 ** | 330.1777    | 329.1937    | 0.0000      | 0.0000   | 0.0000   | 0.0000      | 0.0000      | 0.0000      |
| 5 A 2       | 656.2938 ** | 639.2673    | 638.2833 ** | 246.1566 ** | 229.1301    | 228.1460    | 328.6508 ** | 320.1376 | 319.6455 | 0.0000      | 0.0000      | 0.0000      |
| 6 R 1       | 812.3950    | 795.3684    | 794.3844    | 175.1195 ** | 158.0930 ** | 157.1089    | 406.7014    | 398.1881 | 397.6961 | 0.0000      | 0.0000      | 0.0000      |

TK<sub>pm</sub>QTAR

H3K4

R.TK(+14)QTAR,K (+2) - Mod : 0.04 at 0(-1) - Retention time : 14.63 min - Precursor m/z : 387.73 - Precursor int. : 663154.000 - Basepeak int. : 337726.000

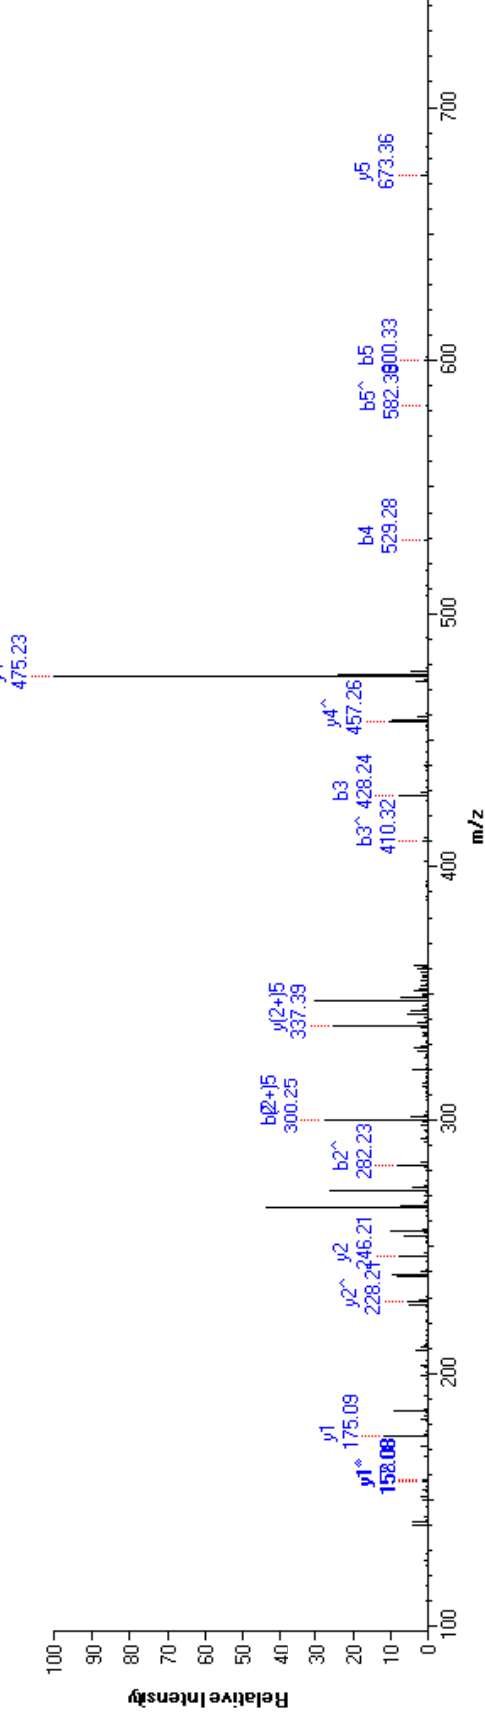

| [b] Seq (y) | b           | b*       | b <sup>+</sup> | y           | y*          | y <sup>+</sup> | b(2+)       | b(2+)*   | b(2+) <sup>+</sup> | y(2+)       | y(2+)*   | y(2+) <sup>+</sup> |
|-------------|-------------|----------|----------------|-------------|-------------|----------------|-------------|----------|--------------------|-------------|----------|--------------------|
| 1 T 6       | 102.0555    | 85.0290  | 84.0449        | 774.4055    | 757.3790    | 756.3950       | 0.0000      | 0.0000   | 0.0000             | 387.7067    | 379.1934 | 378.7014           |
| 2 K 5       | 300.1505 ** | 283.1239 | 282.1399 **    | 673.3578 ** | 656.3313    | 655.3473       | 0.0000      | 0.0000   | 0.0000             | 337.1828 ** | 328.6696 | 328.1776           |
| 3 Q 4       | 428.2090 ** | 411.1825 | 410.1985 **    | 475.2629 ** | 458.2363    | 457.2523 **    | 0.0000      | 0.0000   | 0.0000             | 0.0000      | 0.0000   | 0.0000             |
| 4 T 3       | 529.2567 ** | 512.2302 | 511.2462       | 347.2043    | 330.1777    | 329.1937       | 0.0000      | 0.0000   | 0.0000             | 0.0000      | 0.0000   | 0.0000             |
| 5 A 2       | 600.2938 ** | 583.2673 | 582.2833 **    | 246.1566 ** | 229.1301    | 228.1460 **    | 300.6508 ** | 0.0000   | 0.0000             | 0.0000      | 0.0000   | 0.0000             |
| 6 R 1       | 756.3950    | 739.3694 | 738.3844       | 175.1195 ** | 158.0930 ** | 157.1089 **    | 378.7014    | 370.1881 | 369.6961           | 0.0000      | 0.0000   | 0.0000             |

K<sub>pm</sub>STGGKAPR

H3K9

R/KSTGGKAPR.K (+2) - Mod : 14.00 at K(1) - Retention time : 26.95 min - Precursor m/z : 514.30 - Precursor int. : 1030190.000 - Basepeak int. : 125611.000

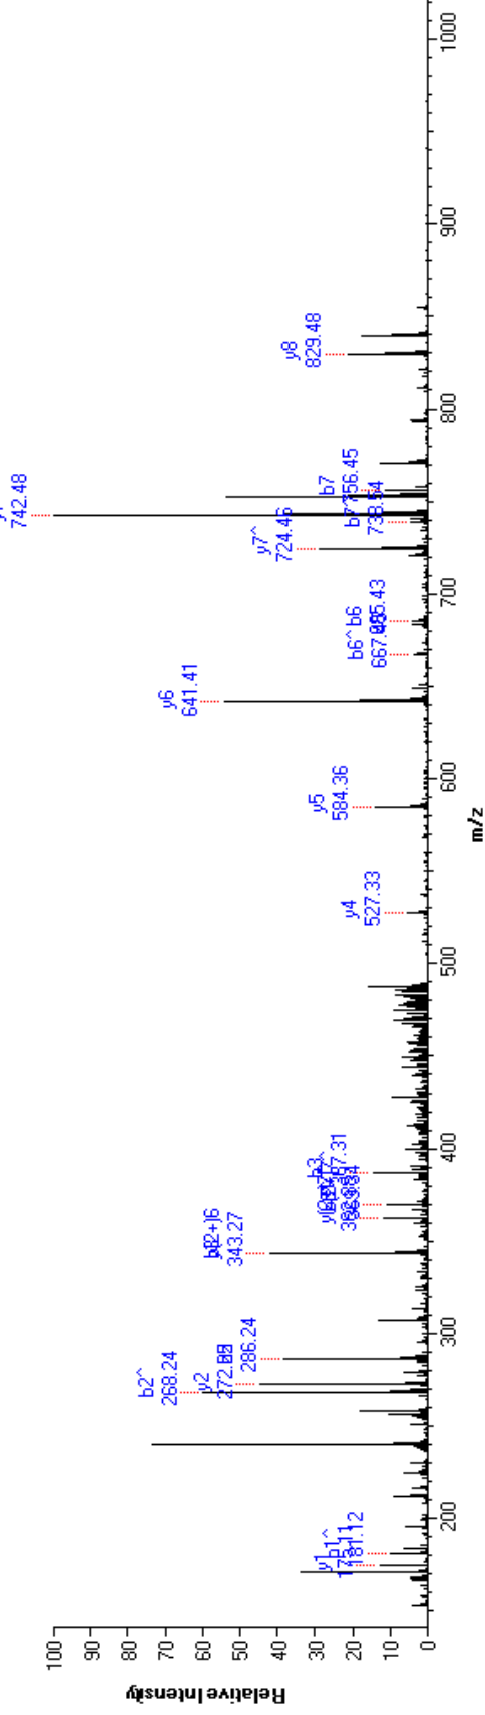

| [b] Seq (v) | b           | b*       | b^          | y           | y*        | y^          | b(2+)       | b(2+)*   | b(2+)^      | y(2+)    | y(2+)*      | y(2+)^      |
|-------------|-------------|----------|-------------|-------------|-----------|-------------|-------------|----------|-------------|----------|-------------|-------------|
| 1 K 9       | 199.1028    | 182.0762 | 181.0922 ** | 1027.5220   | 1010.4954 | 1009.5114   | 0.0000      | 0.0000   | 0.0000      | 514.2649 | 505.7516    | 505.2596    |
| 2 S 8       | 286.1348 ** | 269.1083 | 268.1243 ** | 829.4269 ** | 812.4004  | 811.4164    | 0.0000      | 0.0000   | 0.0000      | 415.2174 | 406.7041    | 406.2121    |
| 3 T 7       | 387.1825 ** | 370.1559 | 369.1719 ** | 742.3949 ** | 725.3684  | 724.3843 ** | 0.0000      | 0.0000   | 0.0000      | 371.7014 | 363.1881 ** | 362.6961 ** |
| 4 G 6       | 444.2039    | 427.1774 | 426.1934    | 641.3472 ** | 624.3207  | 623.3367    | 0.0000      | 0.0000   | 0.0000      | 321.1775 | 312.6643    | 312.1722    |
| 5 G 5       | 501.2254    | 484.1989 | 483.2148    | 584.3258 ** | 567.2993  | 566.3152    | 0.0000      | 0.0000   | 0.0000      | 0.0000   | 0.0000      | 0.0000      |
| 6 K 4       | 685.3204 ** | 668.2938 | 667.3098 ** | 527.3043 ** | 510.2778  | 509.2938    | 343.1641 ** | 334.6508 | 334.1588    | 0.0000   | 0.0000      | 0.0000      |
| 7 A 3       | 756.3575 ** | 739.3309 | 738.3469 ** | 343.2094 ** | 326.1828  | 325.1988    | 378.6826    | 370.1694 | 369.6774 ** | 0.0000   | 0.0000      | 0.0000      |
| 8 P 2       | 853.4102    | 836.3837 | 835.3997    | 272.1722 ** | 255.1457  | 254.1617    | 427.2090    | 418.6958 | 418.2038    | 0.0000   | 0.0000      | 0.0000      |
| 9 R 1       | 1009.5114   | 992.4848 | 991.5008    | 175.1195 ** | 158.0930  | 157.1089    | 505.2596    | 496.7463 | 496.2543    | 0.0000   | 0.0000      | 0.0000      |

pr-K<sub>pm</sub>STGGK

H3K9

R.K(+70)STGGK.A (+1) - Mod : 70.00 at K(6) - Retention time : 51.69 min - Precursor m/z : 773.44 - Precursor  $y_6^*$  int. : 513838.000 - Basepeak int. : 104205.000

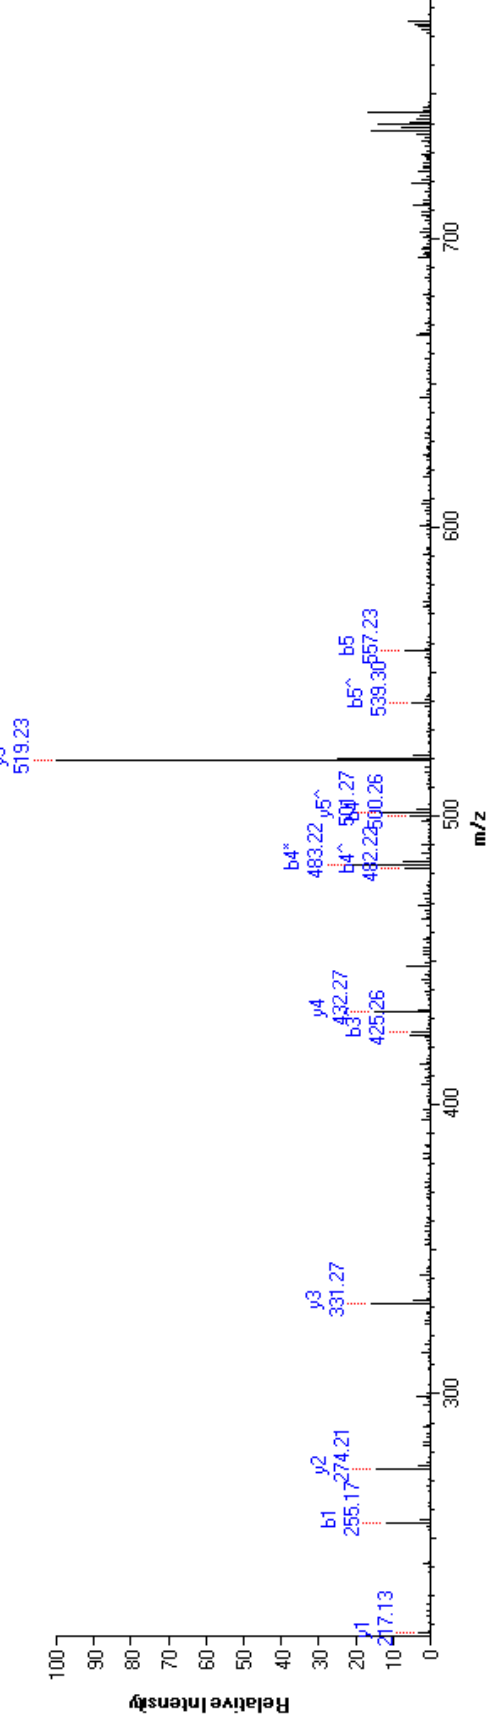

| (b) Seq (y) | b                       | b <sup>*</sup>          | b <sup>^</sup>          | y                       | y <sup>*</sup> | y <sup>^</sup>          |
|-------------|-------------------------|-------------------------|-------------------------|-------------------------|----------------|-------------------------|
| 1 K 6       | 255.1028 <sup>***</sup> | 238.0762                | 237.0922                | 717.3309                | 700.3044       | 699.3204                |
| 2 S 5       | 342.1348                | 325.1083                | 324.1243                | 519.2360 <sup>***</sup> | 502.2094       | 501.2254 <sup>***</sup> |
| 3 T 4       | 443.1825                | 426.1559                | 425.1719 <sup>***</sup> | 432.2039 <sup>***</sup> | 415.1774       | 414.1934                |
| 4 G 3       | 500.2039 <sup>***</sup> | 483.1774 <sup>***</sup> | 482.1934 <sup>***</sup> | 331.1563 <sup>***</sup> | 314.1297       | 313.1457                |
| 5 G 2       | 557.2254 <sup>***</sup> | 540.1989                | 539.2148 <sup>***</sup> | 274.1348 <sup>***</sup> | 257.1083       | 256.1242                |
| 6 K 1       | 755.3204                | 738.2938                | 737.3098                | 217.1133 <sup>***</sup> | 200.0868       | 199.1028                |

# K<sub>ac</sub>STGGK<sub>ac</sub>APR

# H3K9, K14

MS/MS Fragmentation of **KSTGGKAPR**  
Found in **gi|31742503**, histone H3.2 [Homo sapiens]

Match to Query 10128: 984.535684 from(493.275118,2+)  
From data file HelaHistoneH3\_CrotonylIP.dta

Click mouse within plot area to zoom in by factor of two about that point  
Or,  Plot from  to  Da

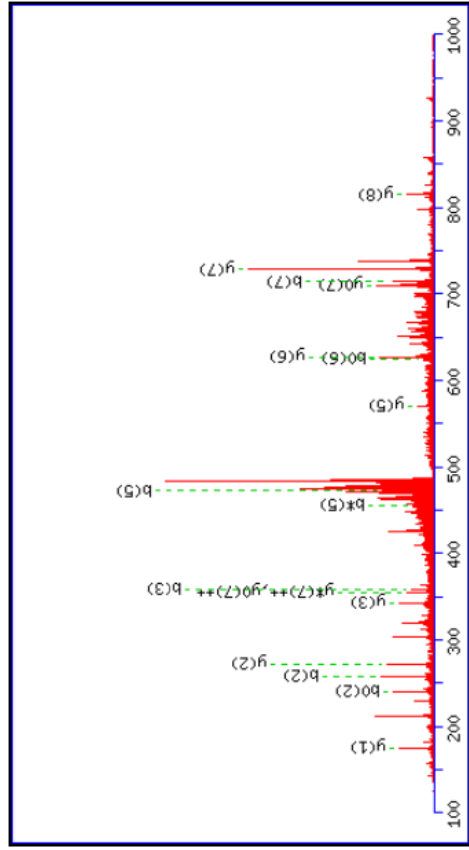

Monoisotopic mass of neutral peptide Mr(calc) : 984.54

Variable modifications:

K1 : Acetyl (K)

K6 : Acetyl (K)

Ions Score: 41 Expect: 0.0073

| # | b      | b <sup>++</sup> | b <sup>*</sup> | b <sup>+++</sup> | b <sup>0</sup> | b <sup>0++</sup> | Seq. | y      | y <sup>++</sup> | y <sup>*</sup> | y <sup>+++</sup> | y <sup>0</sup> | y <sup>0++</sup> | # |
|---|--------|-----------------|----------------|------------------|----------------|------------------|------|--------|-----------------|----------------|------------------|----------------|------------------|---|
| 1 | 171.11 | 86.06           | 154.09         | 77.55            |                |                  | K    |        |                 |                |                  |                |                  | 9 |
| 2 | 258.14 | 129.58          | 241.12         | 121.06           | 240.13         | 120.57           | S    | 815.44 | 408.22          | 798.41         | 399.71           | 797.43         | 399.22           | 8 |
| 3 | 359.19 | 180.10          | 342.17         | 171.59           | 341.18         | 171.09           | T    | 728.40 | 364.71          | 711.38         | 356.19           | 710.39         | 355.70           | 7 |
| 4 | 416.21 | 208.61          | 399.19         | 200.10           | 398.20         | 199.61           | G    | 627.36 | 314.18          | 610.33         | 305.67           |                |                  | 6 |
| 5 | 473.24 | 237.12          | 456.21         | 228.61           | 455.22         | 228.12           | G    | 570.34 | 285.67          | 553.31         | 277.16           |                |                  | 5 |
| 6 | 643.34 | 322.17          | 626.31         | 313.66           | 625.33         | 313.17           | K    | 513.31 | 257.16          | 496.29         | 248.65           |                |                  | 4 |
| 7 | 714.38 | 357.69          | 697.35         | 349.18           | 696.37         | 348.69           | A    | 343.21 | 172.11          | 326.18         | 163.59           |                |                  | 3 |
| 8 | 811.43 | 406.22          | 794.40         | 397.71           | 793.42         | 397.21           | P    | 272.17 | 136.59          | 255.15         | 128.08           |                |                  | 2 |
| 9 |        |                 |                |                  |                |                  | R    | 175.12 | 88.06           | 158.09         | 79.55            |                |                  | 1 |



pr-K<sub>pm</sub>STGGK<sub>ac</sub>APR

H3K9, K14

MS/MS Fragmentation of **KSTGGKAPR**  
Found in **gi|386772**, histone H3 [Homo sapiens]

Match to Query 22037: 1068.592804 from(535.303678,2+)  
From data file HistoneOffgfr8\_9.dta

Click mouse within plot area to zoom in by factor of two about that point.  
Or, Plot from  to  Da

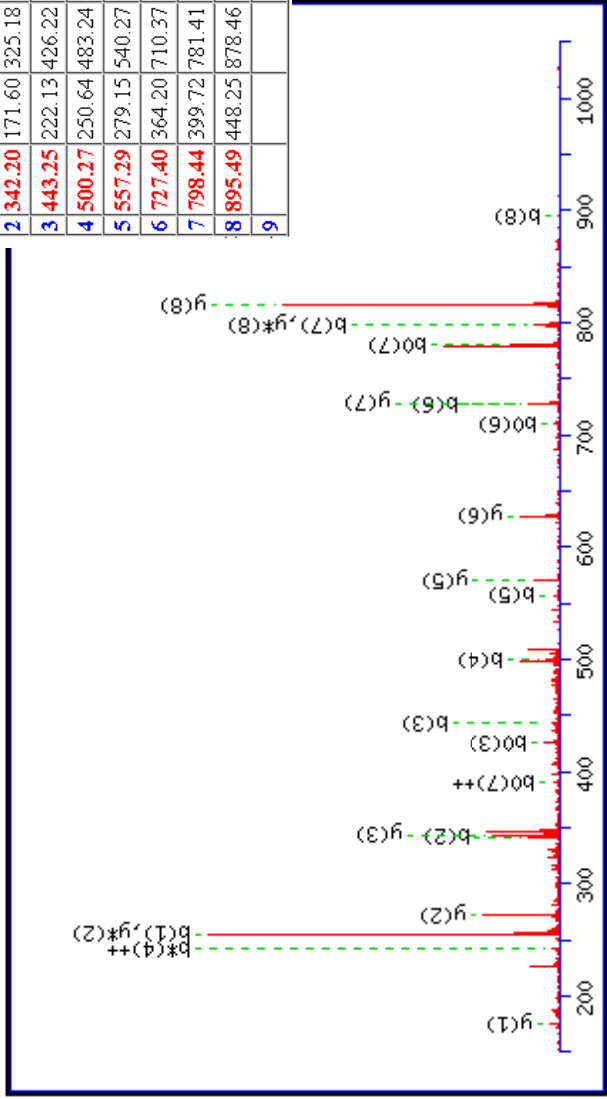

| # | b      | b <sup>++</sup> | b <sup>*</sup> | b <sup>++</sup> | b <sup>0</sup> | b <sup>0++</sup> | Seq. | y      | y <sup>++</sup> | y <sup>*</sup> | y <sup>++</sup> | y <sup>0</sup> | y <sup>0++</sup> | # |
|---|--------|-----------------|----------------|-----------------|----------------|------------------|------|--------|-----------------|----------------|-----------------|----------------|------------------|---|
| 1 | 255.17 | 128.09          | 238.14         | 119.58          |                |                  | K    |        |                 |                |                 |                |                  | 9 |
| 2 | 342.20 | 171.60          | 325.18         | 163.09          | 324.19         | 162.60           | S    | 815.44 | 408.22          | 798.41         | 399.71          | 797.43         | 399.22           | 8 |
| 3 | 443.25 | 222.13          | 426.22         | 213.62          | 425.24         | 213.12           | T    | 728.40 | 364.71          | 711.38         | 356.19          | 710.39         | 355.70           | 7 |
| 4 | 500.27 | 250.64          | 483.24         | 242.13          | 482.26         | 241.63           | G    | 627.36 | 314.18          | 610.33         | 305.67          |                |                  | 6 |
| 5 | 557.29 | 279.15          | 540.27         | 270.64          | 539.28         | 270.14           | G    | 570.34 | 285.67          | 553.31         | 277.16          |                |                  | 5 |
| 6 | 727.40 | 364.20          | 710.37         | 355.69          | 709.39         | 355.20           | K    | 513.31 | 257.16          | 496.29         | 248.65          |                |                  | 4 |
| 7 | 798.44 | 399.72          | 781.41         | 391.21          | 780.43         | 390.72           | A    | 343.21 | 172.11          | 326.18         | 163.59          |                |                  | 3 |
| 8 | 895.49 | 448.25          | 878.46         | 439.73          | 877.48         | 439.24           | P    | 272.17 | 136.59          | 255.15         | 128.08          |                |                  | 2 |
| 9 |        |                 |                |                 |                |                  | R    | 175.12 | 88.06           | 158.09         | 79.55           |                |                  | 1 |

Monoisotopic mass of neutral peptide Mr(calc) : 1068.59  
Fixed modifications: Propionyl (N-term)  
Variable modifications:  
K1 : PropionylMethyl (K)  
K6 : Acetyl (K)  
Ions Score: 44 Expect: 0.003  
Matches (**Bold Red**): 22/82 fragment ions using 55 most intense peaks

**K<sub>pr</sub>STGGK<sub>ac</sub>APR**

**H3K14**

H.K.S166KAPR.HK [+2] - Mod : -14.00 a.f.(b) - Retention time : 21.28 min - Precursor m/z : 500.28 - Precursor int. : 99949.600 - Basepeak int. : 13230.100

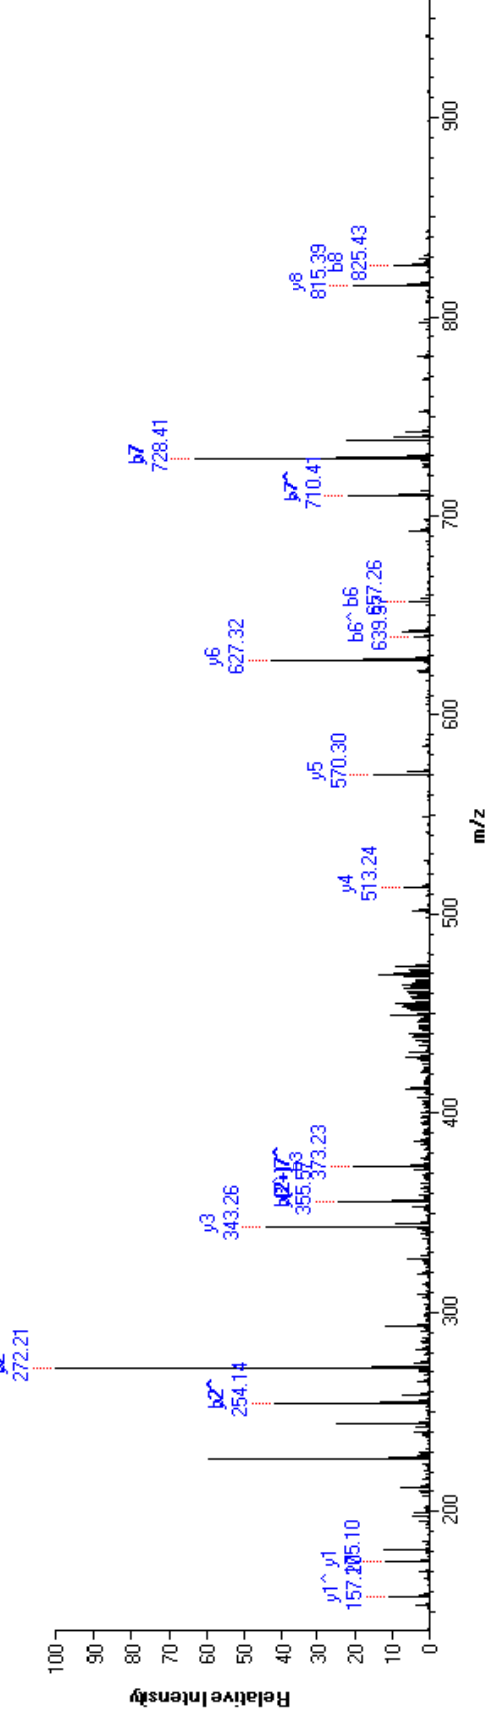

| (b) Seq (y) | b           | b*       | b^          | y           | y*       | y^          | b(2+)    | b(2+)*   | b(2+)^      | y(2+)    | y(2+)*   | y(2+)^      |
|-------------|-------------|----------|-------------|-------------|----------|-------------|----------|----------|-------------|----------|----------|-------------|
| 1 K 9       | 185.1028    | 168.0762 | 167.0922    | 999.5219    | 982.4954 | 981.5114    | 0.0000   | 0.0000   | 0.0000      | 500.2649 | 491.7516 | 491.2596    |
| 2 S 8       | 272.1348 ** | 255.1083 | 254.1243 ** | 815.4269 ** | 798.4004 | 797.4164    | 0.0000   | 0.0000   | 0.0000      | 408.2174 | 399.7041 | 399.2121    |
| 3 T 7       | 373.1825 ** | 356.1559 | 355.1719 ** | 728.3949 ** | 711.3684 | 710.3843 ** | 0.0000   | 0.0000   | 0.0000      | 364.7014 | 356.1881 | 355.6961 ** |
| 4 G 6       | 430.2039    | 413.1774 | 412.1934    | 627.3472 ** | 610.3207 | 609.3367    | 0.0000   | 0.0000   | 0.0000      | 314.1775 | 305.6643 | 305.1722    |
| 5 G 5       | 487.2254    | 470.1989 | 469.2148    | 570.3258 ** | 553.2993 | 552.3152    | 0.0000   | 0.0000   | 0.0000      | 0.0000   | 0.0000   | 0.0000      |
| 6 K 4       | 657.3204 ** | 640.2938 | 639.3098 ** | 513.3043 ** | 496.2778 | 495.2938    | 329.1641 | 320.6508 | 320.1588    | 0.0000   | 0.0000   | 0.0000      |
| 7 A 3       | 728.3575 ** | 711.3309 | 710.3469 ** | 343.2094 ** | 326.1828 | 325.1988    | 364.6826 | 356.1694 | 355.6774 ** | 0.0000   | 0.0000   | 0.0000      |
| 8 P 2       | 825.4102 ** | 808.3837 | 807.3997    | 272.1722 ** | 255.1457 | 254.1617 ** | 413.2090 | 404.6958 | 404.2038    | 0.0000   | 0.0000   | 0.0000      |
| 9 R 1       | 981.5114    | 964.4848 | 963.5008    | 175.1195 ** | 158.0930 | 157.1089 ** | 491.2596 | 482.7463 | 482.2543    | 0.0000   | 0.0000   | 0.0000      |

K<sub>pm</sub>QLATK<sub>pr</sub>AAR

H3K18

R.LQLATKAA.R.K (+2) - Mod : 14.00 at K(1) - Retention time : 38.78 min - Precursor m/z : 556.84 - Precursor int. : 167760.000 - Basepeak int. : 34046.900

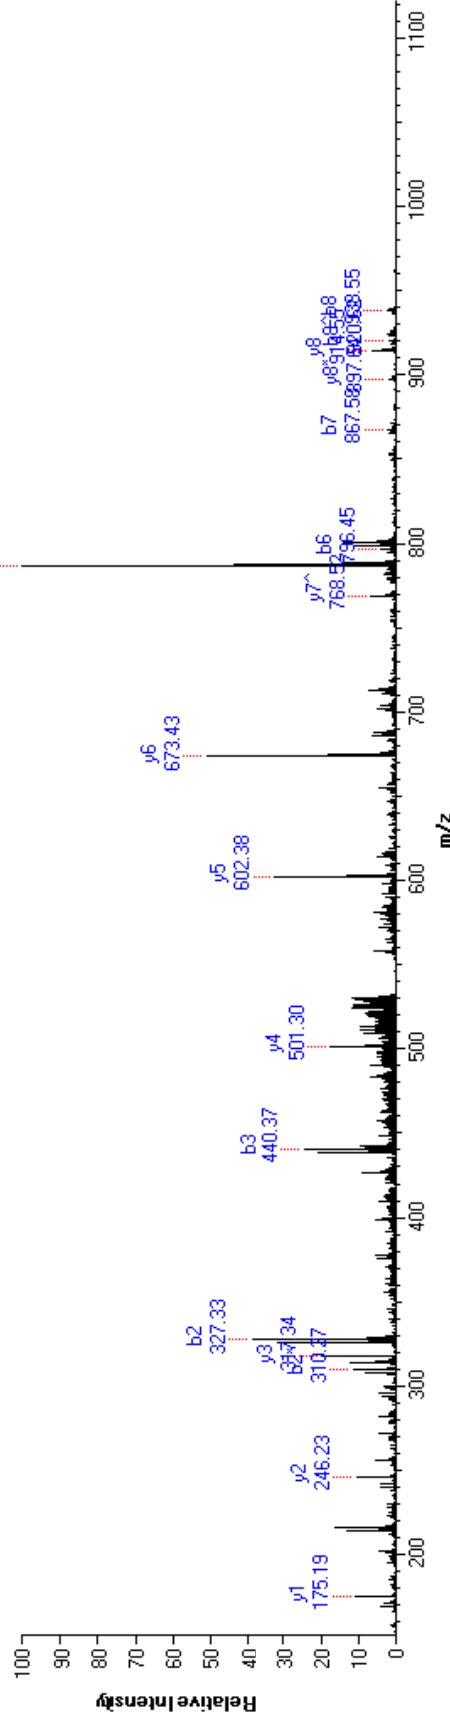

| [b] Seq (y) | b           | b*          | b^          | y           | y*          | y^          | b(2+)    | b(2+)*   | b(2+)^   | y(2+)    | y(2+)*   | y(2+)^   |
|-------------|-------------|-------------|-------------|-------------|-------------|-------------|----------|----------|----------|----------|----------|----------|
| 1 K 9       | 199.1028    | 182.0762    | 181.0922    | 1112.6111   | 1095.5845   | 1094.6005   | 0.0000   | 0.0000   | 0.0000   | 556.8094 | 548.2962 | 547.8041 |
| 2 Q 8       | 327.1614 ** | 310.1348 ** | 309.1508    | 914.5161 ** | 897.4896 ** | 896.5056    | 0.0000   | 0.0000   | 0.0000   | 457.7620 | 449.2487 | 448.7567 |
| 3 L 7       | 440.2454 ** | 423.2189    | 422.2349    | 786.4575 ** | 769.4310    | 768.4470 ** | 0.0000   | 0.0000   | 0.0000   | 393.7327 | 385.2194 | 384.7274 |
| 4 A 6       | 511.2825    | 494.2560    | 493.2720    | 673.3735 ** | 656.3469    | 655.3629    | 0.0000   | 0.0000   | 0.0000   | 337.1906 | 328.6774 | 328.1854 |
| 5 T 5       | 612.3302    | 595.3036    | 594.3196    | 602.3364 ** | 585.3098    | 584.3258    | 0.0000   | 0.0000   | 0.0000   | 301.6721 | 0.0000   | 0.0000   |
| 6 K 4       | 796.4252 ** | 779.3986    | 778.4146    | 501.2887 ** | 484.2621    | 483.2781    | 398.7165 | 390.2032 | 389.7112 | 0.0000   | 0.0000   | 0.0000   |
| 7 A 3       | 867.4623 ** | 850.4357    | 849.4517    | 317.1937 ** | 300.1672    | 299.1832    | 434.2350 | 425.7218 | 425.2298 | 0.0000   | 0.0000   | 0.0000   |
| 8 A 2       | 938.4994 ** | 921.4728    | 920.4888 ** | 246.1566 ** | 229.1301    | 228.1460    | 469.7536 | 461.2403 | 460.7483 | 0.0000   | 0.0000   | 0.0000   |
| 9 R 1       | 1094.6005   | 1077.5740   | 1076.5900   | 175.1195 ** | 158.0930    | 157.1089    | 547.8041 | 539.2909 | 538.7989 | 0.0000   | 0.0000   | 0.0000   |

pr-K<sub>ac</sub>QLATK

H3K18

MS/MS Fragmentation of **KQLATK**

Found in **gi|386772**, histone H3 [Homo sapiens]

Match to Query 6775: 729.437124 from(730.444400,1+)

From data file histoneoffgelnoFr11\_12.dta

Click mouse within plot area to zoom in by factor of two about that point

Or, Plot from  to  Da

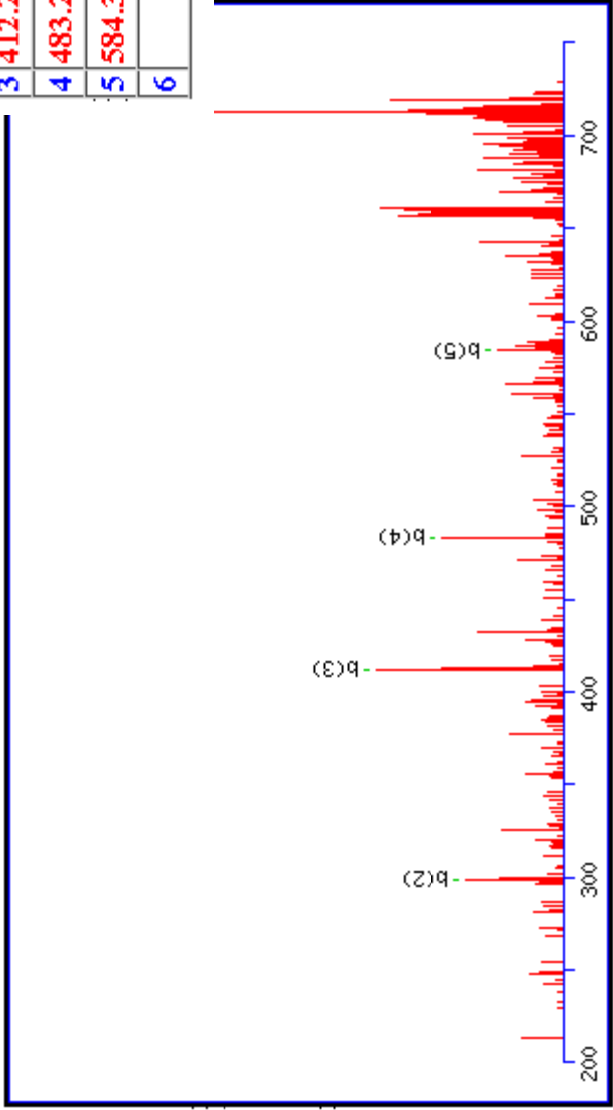

Monoisotopic mass of neutral peptide Mr(calc): 729.44

Variable modifications:

K1 : Acetyl (K)

Ions Score: 33 Expect: 0.059

Matches (**Bold Red**): 4/25 fragment ions using 21 most intense peaks

| #        | b             | b*     | b <sup>0</sup> | Seq.     | y      | y*     | y <sup>0</sup> | #        |
|----------|---------------|--------|----------------|----------|--------|--------|----------------|----------|
| <b>1</b> | 171.11        | 154.09 |                | <b>K</b> |        |        |                | <b>6</b> |
| <b>2</b> | <b>299.17</b> | 282.14 |                | <b>Q</b> | 560.34 | 543.31 | 542.33         | <b>5</b> |
| <b>3</b> | <b>412.26</b> | 395.23 |                | <b>L</b> | 432.28 | 415.26 | 414.27         | <b>4</b> |
| <b>4</b> | <b>483.29</b> | 466.27 |                | <b>A</b> | 319.20 | 302.17 | 301.19         | <b>3</b> |
| <b>5</b> | <b>584.34</b> | 567.31 | 566.33         | <b>T</b> | 248.16 | 231.13 | 230.15         | <b>2</b> |
| <b>6</b> |               |        |                | <b>K</b> | 147.11 | 130.09 |                | <b>1</b> |

pr-K<sub>ac</sub>QLATK<sub>ac</sub>AAR

H3K18, K23

MS/MS Fragmentation of **KQLATKAAR**

Found in **gi|386772**, histone H3 [Homo sapiens]

Match to Query 18421: 1125.646274 from(563.830413,2+)

From data file HistoneOffgelfr2\_3.dta

Click mouse within plot area to zoom in by factor of two about that point

Or, Plot from 150 to 1150 Da

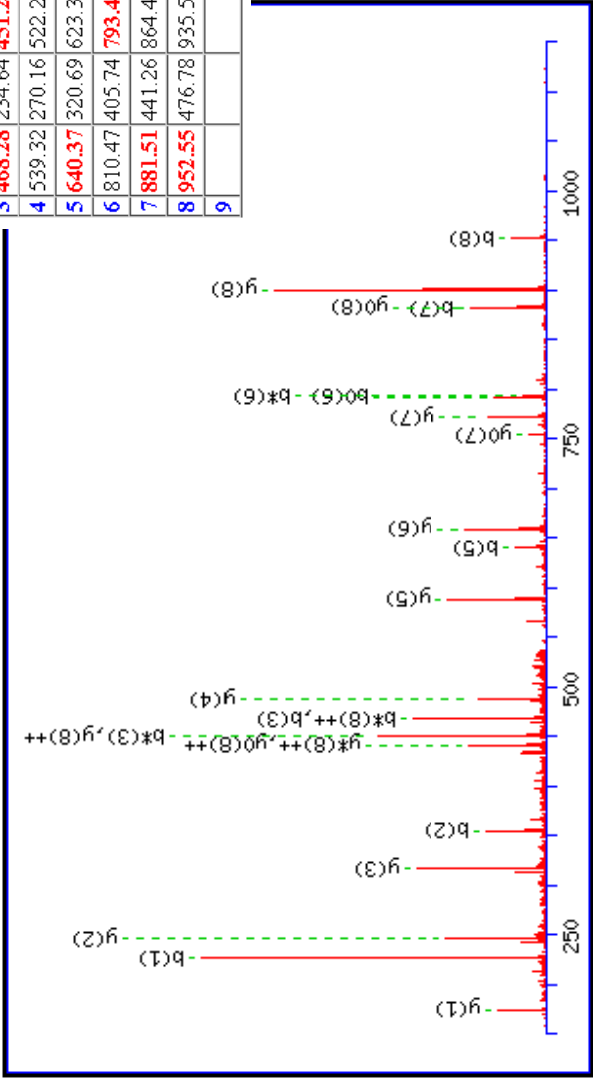

| # | b      | b <sup>++</sup> | b <sup>+</sup> | b <sup>∗++</sup> | b <sup>0</sup> | b <sup>0++</sup> | Seq. | y      | y <sup>++</sup> | y <sup>+</sup> | y <sup>∗++</sup> | y <sup>0</sup> | y <sup>0++</sup> | # |
|---|--------|-----------------|----------------|------------------|----------------|------------------|------|--------|-----------------|----------------|------------------|----------------|------------------|---|
| 1 | 227.14 | 114.07          | 210.11         | 105.56           |                |                  | K    |        |                 |                |                  |                |                  | 9 |
| 2 | 355.20 | 178.10          | 338.17         | 169.59           |                |                  | Q    | 900.53 | 450.77          |                | 442.25           | 882.52         | 441.76           | 8 |
| 3 | 468.28 | 234.64          | 451.26         | 226.13           |                |                  | L    | 772.47 | 386.74          |                | 378.22           | 754.46         | 377.73           | 7 |
| 4 | 539.32 | 270.16          | 522.29         | 261.65           |                |                  | A    | 659.38 | 330.20          |                | 321.68           | 641.37         | 321.19           | 6 |
| 5 | 640.37 | 320.69          | 623.34         | 312.17           | 622.36         | 311.68           | T    | 588.35 | 294.68          |                | 286.16           | 570.34         | 285.67           | 5 |
| 6 | 810.47 | 405.74          | 793.45         | 397.23           | 792.46         | 396.73           | K    | 487.30 | 244.15          |                | 235.64           |                |                  | 4 |
| 7 | 881.51 | 441.26          | 864.48         | 432.74           | 863.50         | 432.25           | A    | 317.19 | 159.10          |                | 150.59           |                |                  | 3 |
| 8 | 952.55 | 476.78          | 935.52         | 468.26           | 934.54         | 467.77           | A    | 246.16 | 123.58          |                | 115.07           |                |                  | 2 |
| 9 |        |                 |                |                  |                |                  | R    | 175.12 | 88.06           |                | 79.55            |                |                  | 1 |

Monoisotopic mass of neutral peptide Mr(calc): 1125.65

Fixed modifications: Propionyl (N-term)

Variable modifications:

K1 : Acetyl (K)

K6 : Acetyl (K)

Ions Score: 60 Expect: 0.00018

Matches (**Bold Red**): 23/80 fragment ions using 37 most intense peaks

K<sub>ac</sub>QLATK<sub>ac</sub>AAR

H3K18, K23

MS/MS Fragmentation of **KQLATKAAR**

Found in **gi386772**, histone H3 [Homo sapiens]

Match to Query 15776: 1069.622714 from(535.818633,2+)

From data file histoneoffgelnoprFr11\_12.dta

Click mouse within plot area to zoom in by factor of two about that po

Or, Plot from  to  Da

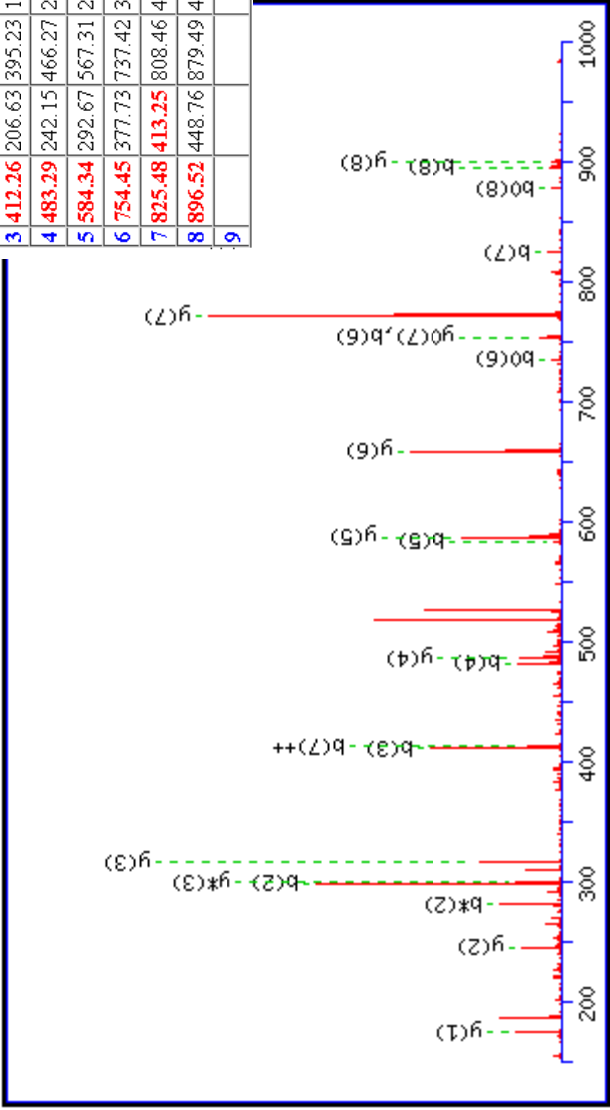

| # | b      | b <sup>++</sup> | b <sup>*</sup> | b <sup>++</sup> | b <sup>+</sup> | b <sup>0</sup> | b <sup>0++</sup> | Seq. | y      | y <sup>++</sup> | y <sup>*</sup> | y <sup>++</sup> | y <sup>0</sup> | y <sup>0++</sup> | # |
|---|--------|-----------------|----------------|-----------------|----------------|----------------|------------------|------|--------|-----------------|----------------|-----------------|----------------|------------------|---|
| 1 | 171.11 | 86.06           | 154.09         | 77.55           |                |                |                  | K    |        |                 |                |                 |                |                  | 9 |
| 2 | 299.17 | 150.09          | 282.14         | 141.58          |                |                |                  | Q    | 900.53 | 450.77          | 883.50         | 442.25          | 882.52         | 441.76           | 8 |
| 3 | 412.26 | 206.63          | 395.23         | 198.12          |                |                |                  | L    | 772.47 | 386.74          | 755.44         | 378.22          | 754.46         | 377.73           | 7 |
| 4 | 483.29 | 242.15          | 466.27         | 233.64          |                |                |                  | A    | 659.38 | 330.20          | 642.36         | 321.68          | 641.37         | 321.19           | 6 |
| 5 | 584.34 | 292.67          | 567.31         | 284.16          | 566.33         | 283.67         |                  | T    | 588.35 | 294.68          | 571.32         | 286.16          | 570.34         | 285.67           | 5 |
| 6 | 754.45 | 377.73          | 737.42         | 369.21          | 736.44         | 368.72         |                  | K    | 487.30 | 244.15          | 470.27         | 235.64          |                |                  | 4 |
| 7 | 825.48 | 413.25          | 808.46         | 404.73          | 807.47         | 404.24         |                  | A    | 317.19 | 159.10          | 300.17         | 150.59          |                |                  | 3 |
| 8 | 896.52 | 448.76          | 879.49         | 440.25          | 878.51         | 439.76         |                  | A    | 246.16 | 123.58          | 229.13         | 115.07          |                |                  | 2 |
| 9 |        |                 |                |                 |                |                |                  | R    | 175.12 | 88.06           | 158.09         | 79.55           |                |                  | 1 |

Monoisotopic mass of neutral peptide Mr(calc): 1069.62

Variable modifications:

K1 : Acetyl (K)

K6 : Acetyl (K)

Ions Score: 58 Expect: 0.00027

Matches (**Bold Red**): 21/80 fragment ions using 42 most intense peaks

# K<sub>ac</sub>QLATK<sub>ac</sub>AAR

# H3K18, K23

MS/MS Fragmentation of **KQLATKAAR**

Found in **gi|31742503**, histone H3.2 [Homo sapiens]

Match to Query 12513: 1069.621494 from(535.818023,2+)

From data file HelaHistoneH3\_CrotonylIP.dta

Click mouse within plot area to zoom in by factor of two about that point  
Or, Plot from  to  Da

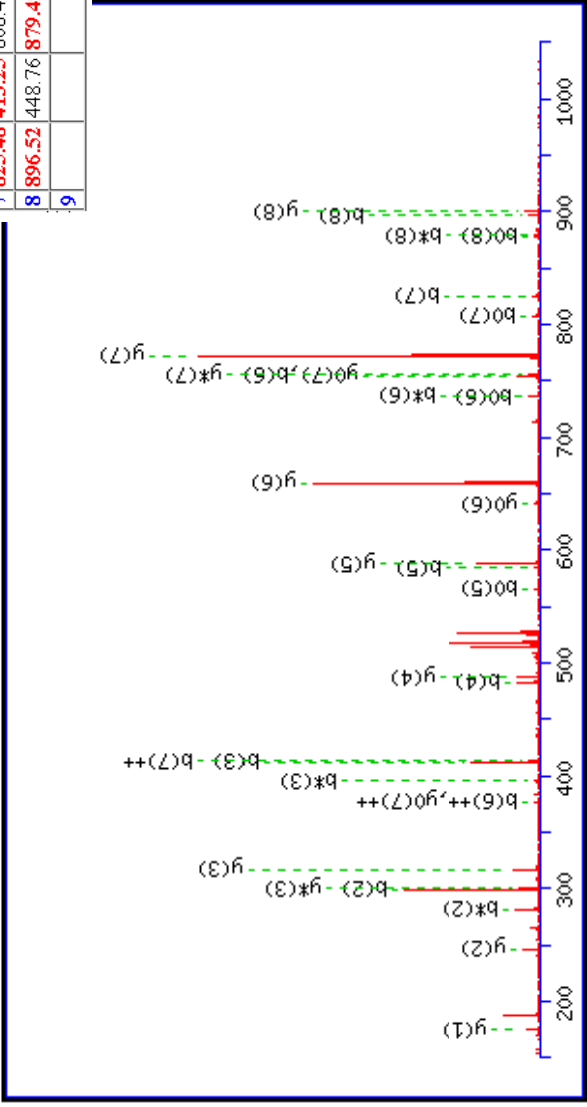

| # | b      | b <sup>++</sup> | b <sup>*</sup> | b <sup>++</sup> | b <sup>0++</sup> | Seq. | y      | y <sup>++</sup> | y <sup>*</sup> | y <sup>++</sup> | y <sup>0++</sup> | # |
|---|--------|-----------------|----------------|-----------------|------------------|------|--------|-----------------|----------------|-----------------|------------------|---|
| 1 | 171.11 | 86.06           | 154.09         | 77.55           |                  | K    |        |                 |                |                 |                  | 9 |
| 2 | 299.17 | 150.09          | 282.14         | 141.58          |                  | Q    | 900.53 | 450.77          | 883.50         | 442.25          | 882.52           | 8 |
| 3 | 412.26 | 206.63          | 395.23         | 198.12          |                  | L    | 772.47 | 386.74          | 755.44         | 378.22          | 754.46           | 7 |
| 4 | 483.29 | 242.15          | 466.27         | 233.64          |                  | A    | 659.38 | 330.20          | 642.36         | 321.68          | 641.37           | 6 |
| 5 | 584.34 | 292.67          | 567.31         | 284.16          | 566.33           | T    | 588.35 | 294.68          | 571.32         | 286.16          | 570.34           | 5 |
| 6 | 754.45 | 377.73          | 737.42         | 369.21          | 736.44           | K    | 487.30 | 244.15          | 470.27         | 235.64          |                  | 4 |
| 7 | 825.48 | 413.25          | 808.46         | 404.73          | 807.47           | A    | 317.19 | 159.10          | 300.17         | 150.59          |                  | 3 |
| 8 | 896.52 | 448.76          | 879.49         | 440.25          | 878.51           | A    | 246.16 | 123.58          | 229.13         | 115.07          |                  | 2 |
| 9 |        |                 |                |                 |                  | R    | 175.12 | 88.06           | 158.09         | 79.55           |                  | 1 |

Monoisotopic mass of neutral peptide Mr(calc): 1069.62

Variable modifications:

K1 : Acetyl (K)

K6 : Acetyl (K)

Ions Score: 56 Expect: 0.00027

Matches (**Bold Red**): 30/80 fragment ions using 55 most intense peaks

K<sub>ac</sub>QLATK<sub>ac</sub>AAR

H3K18, K23

RLK(-14)QLATKAAAR,K (+2) - Mod : -14.00 at K(6) - Retention time : 27.71 min - Precursor m/z : 535.82 - Precursor int. : 1568960.000 - Basepeak<sub>y7</sub> int. : 482011.000

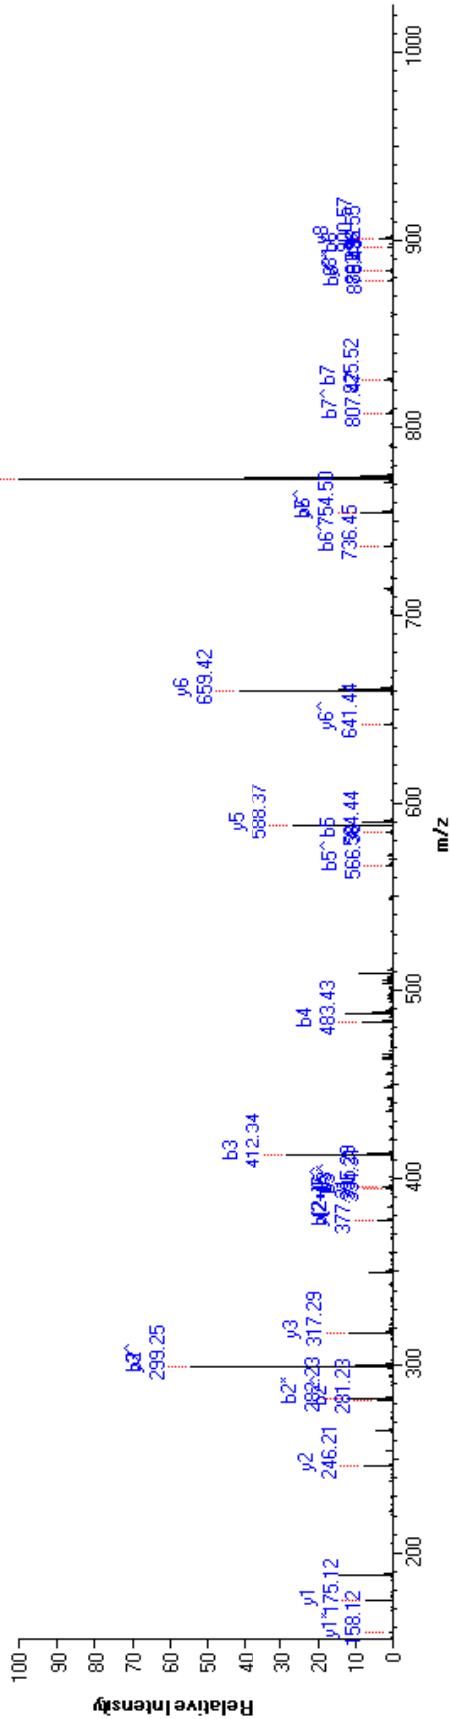

| (b) Seq (y) | b           | b*          | b <sup>+</sup> | y           | y*          | y <sup>+</sup> | b(2+)       | b(2+)*   | y(2+)    | y(2+)*   | y(2+) <sup>+</sup> |
|-------------|-------------|-------------|----------------|-------------|-------------|----------------|-------------|----------|----------|----------|--------------------|
| 1 K 9       | 171.1028    | 154.0762    | 153.0922       | 1070.6111   | 1053.5845   | 1052.6005      | 0.0000      | 0.0000   | 535.8094 | 527.2962 | 526.8041           |
| 2 Q 8       | 299.1614 ** | 282.1348 ** | 281.1508 **    | 900.5161 ** | 883.4896 ** | 882.5056       | 0.0000      | 0.0000   | 450.7620 | 442.2487 | 441.7567           |
| 3 L 7       | 412.2454 ** | 395.2189 ** | 394.2349 **    | 772.4575 ** | 755.4310    | 754.4470 **    | 0.0000      | 0.0000   | 386.7327 | 378.2194 | 377.7274 **        |
| 4 A 6       | 483.2825 ** | 466.2560    | 465.2720       | 659.3735 ** | 642.3469    | 641.3629 **    | 0.0000      | 0.0000   | 330.1906 | 321.6774 | 321.1854           |
| 5 T 5       | 584.3302 ** | 567.3036    | 566.3196 **    | 588.3364 ** | 571.3098    | 570.3258       | 0.0000      | 0.0000   | 294.6721 | 0.0000   | 0.0000             |
| 6 K 4       | 754.4252 ** | 737.3986    | 736.4146 **    | 487.2887    | 470.2621    | 469.2781       | 377.7165 ** | 369.2032 | 0.0000   | 0.0000   | 0.0000             |
| 7 A 3       | 825.4623 ** | 808.4357    | 807.4517 **    | 317.1937 ** | 300.1672    | 299.1832 **    | 413.2350    | 404.7218 | 0.0000   | 0.0000   | 0.0000             |
| 8 A 2       | 896.4994 ** | 879.4728    | 878.4888 **    | 246.1566 ** | 229.1301    | 228.1460       | 448.7536    | 440.2403 | 0.0000   | 0.0000   | 0.0000             |
| 9 R 1       | 1052.6005   | 1035.5740   | 1034.5900      | 175.1195 ** | 158.0930 ** | 157.1089       | 526.8041    | 518.2909 | 0.0000   | 0.0000   | 0.0000             |

pr-K<sub>pr</sub>QLATK<sub>pm</sub>

H3K23

R.K(+56)QLATK.A (+1) - Mod : 70.00 at K(6) - Retention time : 59.51 min - Precursor m/z : 870.53 - Precursor int. : 710674.000 - Basepeak int. : 70238.100

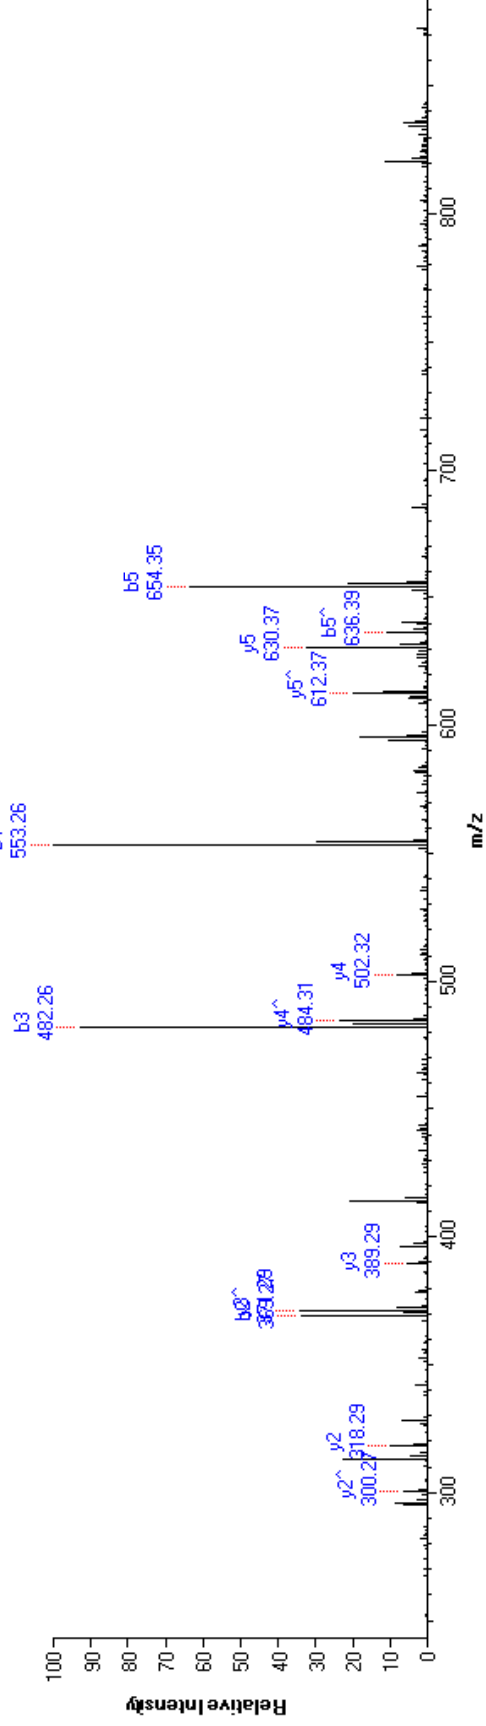

| [b] Seq (y) | b                       | b <sup>+</sup> | b <sup>+</sup>          | y                       | y <sup>+</sup> | y <sup>+</sup>          |
|-------------|-------------------------|----------------|-------------------------|-------------------------|----------------|-------------------------|
| 1 K 6       | 241.1028                | 224.0762       | 223.0922                | 814.4357                | 797.4092       | 796.4252                |
| 2 Q 5       | 369.1614 <sup>***</sup> | 352.1348       | 351.1508                | 630.3408 <sup>***</sup> | 613.3142       | 612.3302 <sup>***</sup> |
| 3 L 4       | 482.2454 <sup>***</sup> | 465.2189       | 464.2349                | 502.2822 <sup>***</sup> | 485.2556       | 484.2716 <sup>***</sup> |
| 4 A 3       | 553.2825 <sup>***</sup> | 536.2560       | 535.2720                | 389.1981 <sup>***</sup> | 372.1716       | 371.1876 <sup>***</sup> |
| 5 T 2       | 654.3302 <sup>***</sup> | 637.3036       | 636.3196 <sup>***</sup> | 318.1610 <sup>***</sup> | 301.1345       | 300.1505 <sup>***</sup> |
| 6 K 1       | 852.4252                | 835.3986       | 834.4146                | 217.1133                | 200.0868       | 199.1028                |

# KQLATK<sub>ac</sub>AAR

# H3K23

MS/MS Fragmentation of **KQLATK**AAR****

Found in **gi|31742503**, histone H3.2 [Homo sapiens]

Match to Query 11062: 1027.612094 from(514.813323,2+)

From data file HelaHistoneH3\_CrotonyIP.dta

Click mouse within plot area to zoom in by factor of two about that poi

Or, Plot from  to  Da

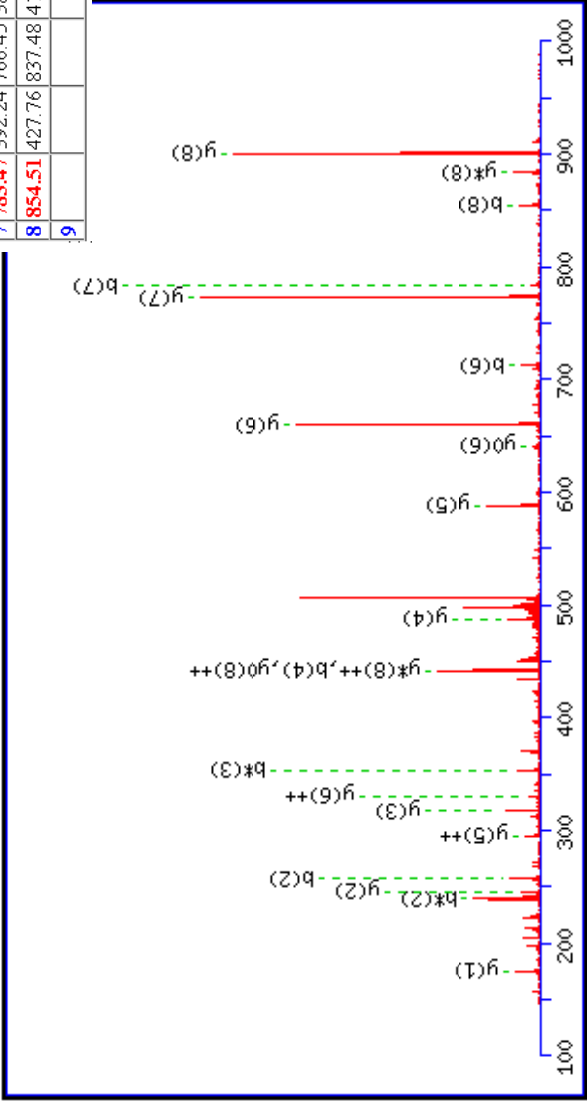

| # | b             | b <sup>++</sup> | b <sup>*</sup> | b <sup>++</sup> | b <sup>0</sup> | b <sup>0++</sup> | Seq. | y             | y <sup>++</sup> | y <sup>*</sup> | y <sup>++</sup> | y <sup>0</sup> | y <sup>0++</sup> | # |
|---|---------------|-----------------|----------------|-----------------|----------------|------------------|------|---------------|-----------------|----------------|-----------------|----------------|------------------|---|
| 1 | 129.10        | 65.05           | 112.08         | 56.54           |                |                  | K    |               |                 |                |                 |                |                  | 9 |
| 2 | <b>257.16</b> | 129.08          | <b>240.13</b>  | 120.57          |                |                  | Q    | <b>900.53</b> | 450.77          | <b>883.50</b>  | <b>442.25</b>   | 882.52         | <b>441.76</b>    | 8 |
| 3 | 370.24        | 185.63          | <b>353.22</b>  | 177.11          |                |                  | L    | <b>772.47</b> | 386.74          | 755.44         | 378.22          | 754.46         | 377.73           | 7 |
| 4 | <b>441.28</b> | 221.14          | 424.26         | 212.63          |                |                  | A    | <b>659.38</b> | <b>330.20</b>   | 642.36         | 321.68          | <b>641.37</b>  | 321.19           | 6 |
| 5 | 542.33        | 271.67          | 525.30         | 263.16          | 524.32         | 262.66           | T    | <b>588.35</b> | <b>294.68</b>   | 571.32         | 286.16          | 570.34         | 285.67           | 5 |
| 6 | <b>712.44</b> | 356.72          | 695.41         | 348.21          | 694.42         | 347.72           | K    | <b>487.30</b> | 244.15          | 470.27         | 235.64          |                |                  | 4 |
| 7 | <b>783.47</b> | 392.24          | 766.45         | 383.73          | 765.46         | 383.23           | A    | <b>317.19</b> | 159.10          | 300.17         | 150.59          |                |                  | 3 |
| 8 | <b>854.51</b> | 427.76          | 837.48         | 419.25          | 836.50         | 418.75           | A    | <b>246.16</b> | 123.58          | 229.13         | 115.07          |                |                  | 2 |
| 9 |               |                 |                |                 |                |                  | R    | <b>175.12</b> | 88.06           | 158.09         | 79.55           |                |                  | 1 |

Monoisotopic mass of neutral peptide Mr(calc): 1027.61

Variable modifications:

K6 : Acetyl1 (K)

Ions Score: 54 Expect: 0.00042

Matches (**Bold Red**): 21/80 fragment ions using 44 most intense peaks

pr-QLATK<sub>ac</sub>AAR

H3K23

K.QLATK4AR.K (+2) <sub>b1</sub>Mod : 42.00 at K(5) - Retention time : 44.76 min - Precursor m/z : 478.78 - Precursor int. : 193814.000 - Basepeak int. : 54753.300

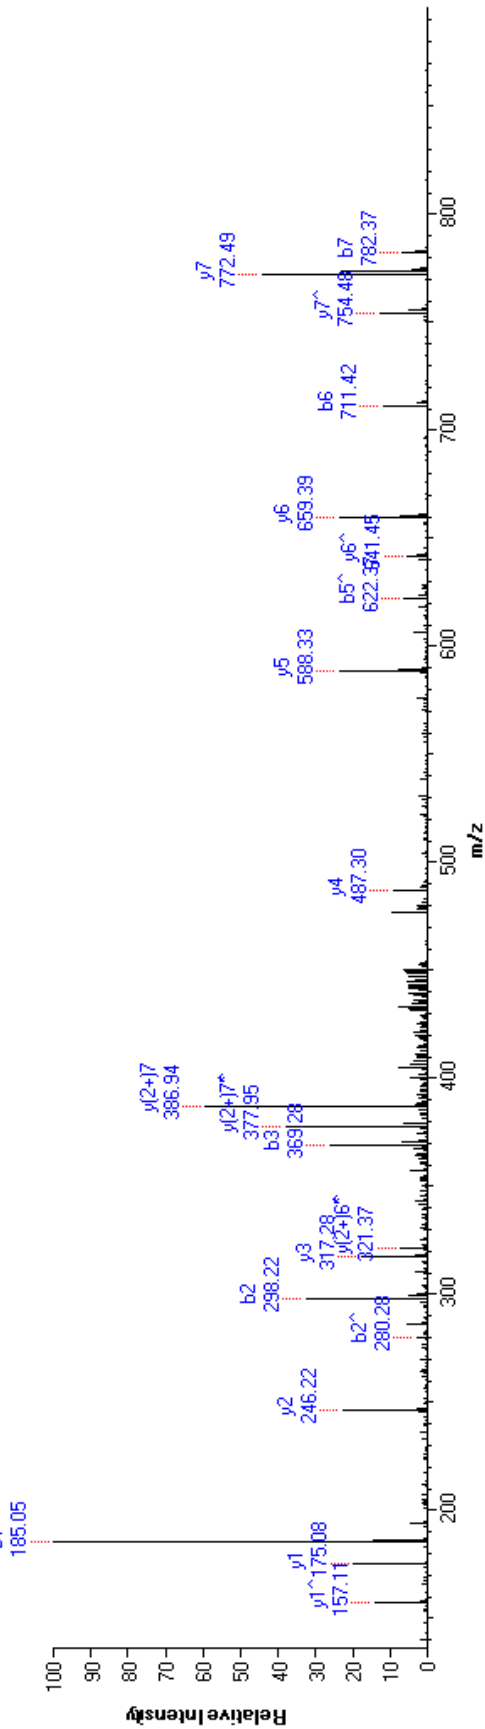

| (b) Seq (y) |     | b                      | b <sup>+</sup> | b <sup>-</sup>         | y                      | y <sup>+</sup> | y <sup>-</sup>         | b(2+)    | b(2+) <sup>+</sup> | b(2+) <sup>-</sup> | y(2+)                  | y(2+) <sup>+</sup>     | y(2+) <sup>-</sup>     |
|-------------|-----|------------------------|----------------|------------------------|------------------------|----------------|------------------------|----------|--------------------|--------------------|------------------------|------------------------|------------------------|
| 1           | Q 8 | 185.0664 <sup>**</sup> | 168.0399       | 167.0558               | 900.5161               | 883.4896       | 882.5056               | 0.0000   | 0.0000             | 0.0000             | 450.7620               | 442.2487               | 441.7567               |
| 2           | L 7 | 298.1505 <sup>**</sup> | 281.1239       | 280.1399 <sup>**</sup> | 772.4575 <sup>**</sup> | 755.4310       | 754.4470 <sup>**</sup> | 0.0000   | 0.0000             | 0.0000             | 386.7327 <sup>**</sup> | 378.2194 <sup>**</sup> | 377.7274 <sup>**</sup> |
| 3           | A 6 | 369.1876 <sup>**</sup> | 352.1610       | 351.1770               | 659.3735 <sup>**</sup> | 642.3469       | 641.3629 <sup>**</sup> | 0.0000   | 0.0000             | 0.0000             | 330.1906               | 321.6774 <sup>**</sup> | 321.1854 <sup>**</sup> |
| 4           | T 5 | 470.2353               | 453.2087       | 452.2247               | 588.3364 <sup>**</sup> | 571.3098       | 570.3258               | 0.0000   | 0.0000             | 0.0000             | 0.0000                 | 0.0000                 | 0.0000                 |
| 5           | K 4 | 640.3302               | 623.3036       | 622.3196 <sup>**</sup> | 487.2887 <sup>**</sup> | 470.2621       | 469.2781               | 0.0000   | 0.0000             | 0.0000             | 0.0000                 | 0.0000                 | 0.0000                 |
| 6           | A 3 | 711.3673 <sup>**</sup> | 694.3408       | 693.3568               | 317.1937 <sup>**</sup> | 300.1672       | 299.1832               | 356.1876 | 347.6743           | 347.1823           | 0.0000                 | 0.0000                 | 0.0000                 |
| 7           | A 2 | 782.4044 <sup>**</sup> | 765.3779       | 764.3939               | 246.1566 <sup>**</sup> | 229.1301       | 228.1460               | 391.7061 | 383.1929           | 382.7008           | 0.0000                 | 0.0000                 | 0.0000                 |
| 8           | R 1 | 938.5056               | 921.4790       | 920.4950               | 175.1195 <sup>**</sup> | 158.0930       | 157.1089 <sup>**</sup> | 469.7567 | 461.2434           | 460.7514           | 0.0000                 | 0.0000                 | 0.0000                 |

# H3K27

## K<sub>pm</sub>SAPATGGVK<sub>pr</sub>K<sub>pr</sub>PHR

R.LKSAPATGGVKKPHR.Y (+2) - Mod. 3 - 14.00 at K(1) - Retention time : 41.33 min - Precursor m/z : 808.47 - Precursor int. : 435426.000 - Basepeak int. : 23494.800

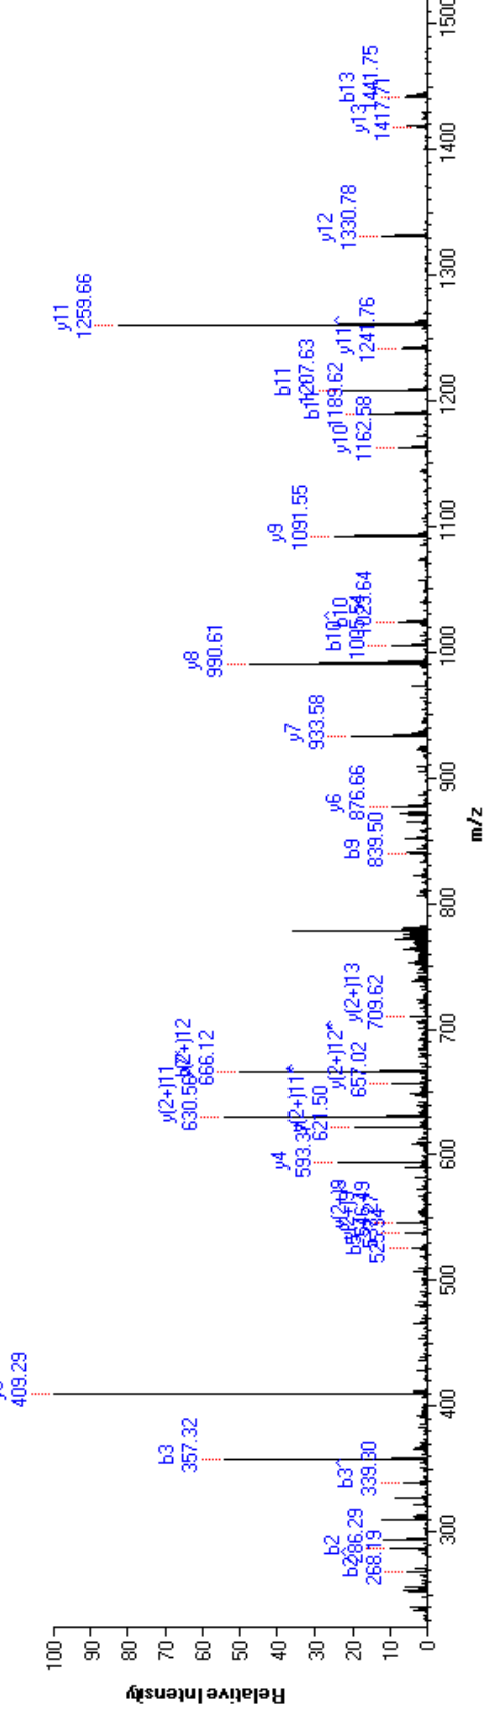

| [b] Seq [w] | b            | b*          | b^           | y            | y*        | y^           | b(2+)    | b(2+)*   | b(2+)^   | y(2+)       | y(2+)*      | y(2+)^      |
|-------------|--------------|-------------|--------------|--------------|-----------|--------------|----------|----------|----------|-------------|-------------|-------------|
| 1 K 14      | 199.1028     | 182.0762    | 181.0922     | 1615.8341    | 1598.8075 | 1597.8235    | 0.0000   | 0.0000   | 0.0000   | 808.4210    | 799.9077    | 799.4156    |
| 2 S 13      | 286.1348 **  | 269.1083    | 268.1243 **  | 1417.7391 ** | 1400.7125 | 1399.7285    | 0.0000   | 0.0000   | 0.0000   | 709.3735 ** | 700.8602    | 700.3682    |
| 3 A 12      | 357.1719 **  | 340.1454    | 339.1614 **  | 1330.7070 ** | 1313.6805 | 1312.6965    | 0.0000   | 0.0000   | 0.0000   | 665.8574 ** | 657.3442 ** | 656.8522 ** |
| 4 P 11      | 454.2247     | 437.1982    | 436.2141     | 1259.6699 ** | 1242.6434 | 1241.6594 ** | 0.0000   | 0.0000   | 0.0000   | 630.3389 ** | 621.8256 ** | 621.3336 ** |
| 5 A 10      | 525.2618 **  | 508.2353    | 507.2512     | 1162.6172 ** | 1145.5907 | 1144.6067    | 0.0000   | 0.0000   | 0.0000   | 581.8125    | 573.2993    | 572.8073    |
| 6 T 9       | 626.3094     | 609.2830    | 608.2989     | 1091.5801 ** | 1074.5536 | 1073.5696    | 313.6587 | 0.0000   | 0.0000   | 546.2939 ** | 537.7807    | 537.2887 ** |
| 7 G 8       | 683.3309     | 666.3044 ** | 665.3204     | 990.5324 **  | 973.5059  | 972.5219     | 342.1694 | 333.6561 | 333.1641 | 495.7701    | 487.2568    | 486.7648    |
| 8 G 7       | 740.3524     | 723.3259    | 722.3419     | 933.5109 **  | 916.4844  | 915.5004     | 370.6801 | 362.1668 | 361.6748 | 467.2594    | 458.7461    | 458.2541    |
| 9 V 6       | 839.4208 **  | 822.3943    | 821.4102     | 876.4895 **  | 859.4630  | 858.4789     | 420.2143 | 411.7010 | 411.2090 | 438.7487    | 430.2354    | 429.7434    |
| 10 K 5      | 1023.5157 ** | 1006.4892   | 1005.5052 ** | 777.4211     | 760.3945  | 759.4105     | 512.2618 | 503.7485 | 503.2565 | 389.2144    | 380.7012    | 380.2092    |
| 11 K 4      | 1207.6107 ** | 1190.5842   | 1189.6002 ** | 593.3261 **  | 576.2996  | 575.3156     | 604.3093 | 595.7960 | 595.3040 | 0.0000      | 0.0000      | 0.0000      |
| 12 P 3      | 1304.6635    | 1287.6370   | 1286.6530    | 409.2312 **  | 392.2046  | 391.2206     | 652.8356 | 644.3224 | 643.8304 | 0.0000      | 0.0000      | 0.0000      |
| 13 H 2      | 1441.7224 ** | 1424.6958   | 1423.7118    | 312.1784     | 295.1519  | 294.1678     | 721.3651 | 712.8519 | 712.3598 | 0.0000      | 0.0000      | 0.0000      |
| 14 R 1      | 1597.8235    | 1580.7970   | 1579.8130    | 175.1195     | 158.0930  | 157.1089     | 799.4156 | 790.9024 | 790.4104 | 0.0000      | 0.0000      | 0.0000      |

# K<sub>me1</sub>SAPATGGVK

# H3K27

MS/MS Fragmentation of **KSAPATGGVK**

Found in **gi|31742503**, histone H3.2 [Homo sapiens]

Match to Query 7840: 928.533174 from(465.273863,2+)

From data file HelaHistoneH3\_CrotonylIP.dta

Click mouse within plot area to zoom in by factor of two about that poi

Or, Plot from  to  Da

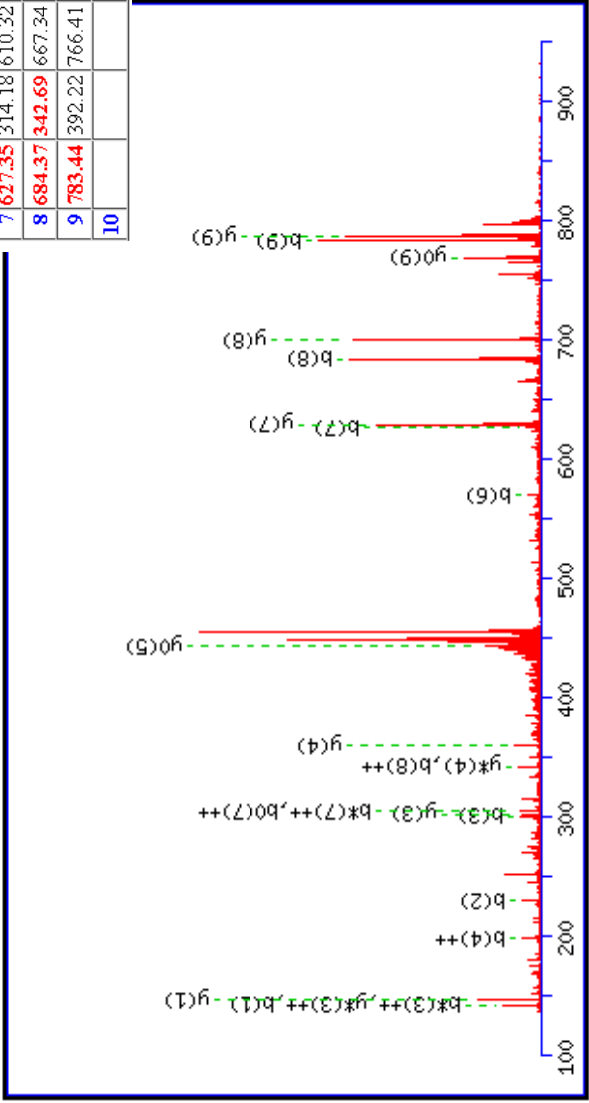

pr-K<sub>pm</sub>SAPATGGVK<sub>pm</sub>

H3K27, K36

R.K(+70)SAPATGGVK.K (+2)<sub>b1</sub>Mod : 70.00 at K(10) - Retention time : 55.82 min - Precursor m/z : 556.32 - Precursor int. : 2579850.000 - Basepeak int. : 425180.000

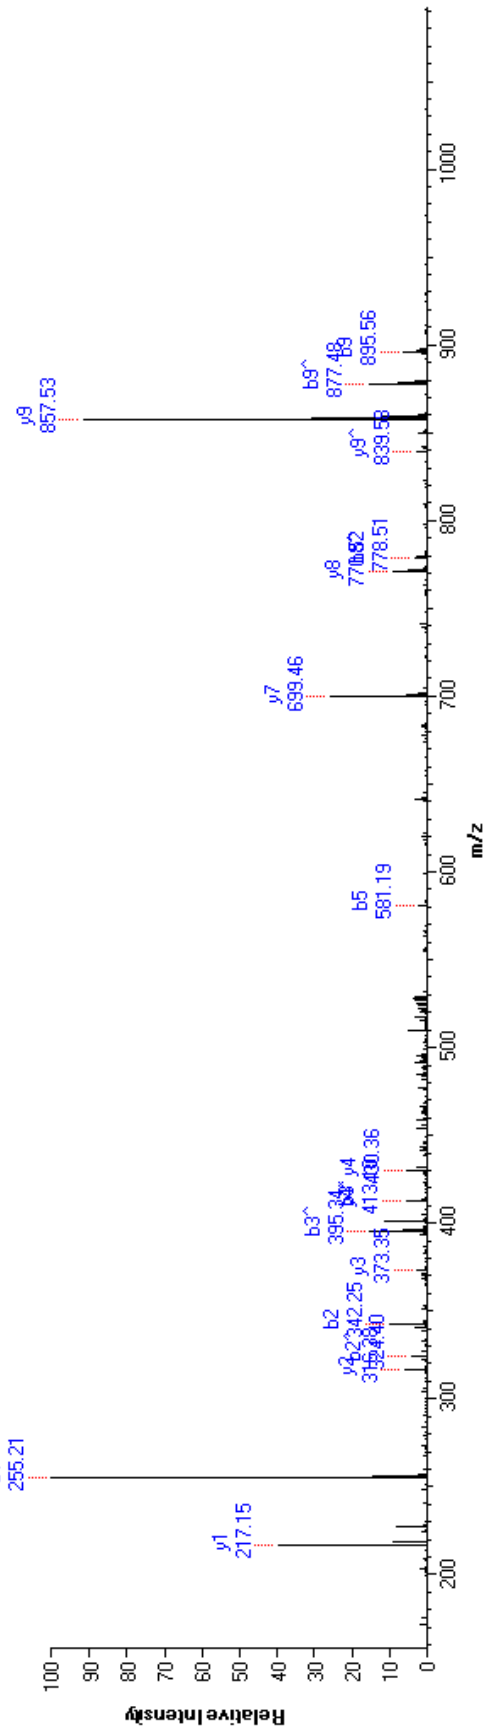

| (b) Seq (y) | b           | b <sup>+</sup> | y           | y <sup>+</sup> | b(2+)       | b(2+) <sup>+</sup> | y(2+)    | y(2+) <sup>+</sup> |
|-------------|-------------|----------------|-------------|----------------|-------------|--------------------|----------|--------------------|
| 1 K 10      | 255.1028 ** | 237.0922       | 1055.5264   | 1038.4998      | 1037.5157   | 0.0000             | 528.2671 | 519.7538           |
| 2 S 9       | 342.1348 ** | 324.1243 **    | 857.4313 ** | 840.4048       | 839.4208 ** | 0.0000             | 429.2196 | 420.2143           |
| 3 A 8       | 413.1719 ** | 395.1614 **    | 770.3994 ** | 753.3728       | 752.3888    | 0.0000             | 385.7036 | 376.6983           |
| 4 P 7       | 510.2247    | 493.1982       | 699.3622 ** | 682.3357       | 681.3517    | 0.0000             | 350.1850 | 341.1797           |
| 5 A 6       | 581.2618 ** | 563.2512       | 602.3094    | 585.2829       | 584.2989    | 0.0000             | 0.0000   | 0.0000             |
| 6 T 5       | 682.3094    | 664.2989       | 531.2723    | 514.2458       | 513.2618    | 333.1454           | 0.0000   | 0.0000             |
| 7 G 4       | 739.3309    | 721.3204       | 430.2247 ** | 413.1981 **    | 412.2141    | 361.6561           | 0.0000   | 0.0000             |
| 8 G 3       | 796.3524    | 778.3259       | 373.2032 ** | 356.1767       | 355.1927    | 398.6801           | 0.0000   | 0.0000             |
| 9 V 2       | 895.4208 ** | 877.4102 **    | 316.1818 ** | 299.1552       | 298.1712    | 439.7010           | 0.0000   | 0.0000             |
| 10 K 1      | 1093.5157   | 1075.5052      | 217.1133 ** | 200.0868       | 199.1028    | 538.7485           | 0.0000   | 0.0000             |

# K<sub>me1</sub>SAPATGGVK<sub>me1</sub>KPHR

# H3K27, K36

MS/MS Fragmentation of **KSAPATGGVVKPHR**

Found in **gi|31742503**, histone H3.2 [Homo sapiens]

Match to Query 19431: 1460.856234 from(731.435393,2+)

From data file HelaHistoneH3\_CrotonylIP.dta

Click mouse within plot area to zoom in by factor of two about that po

Or, Plot from  to  Da

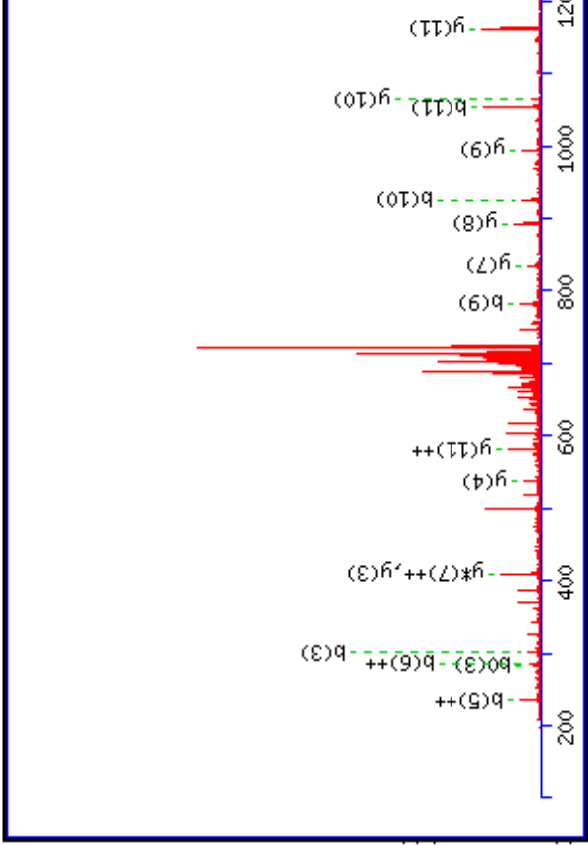

Monoisotopic mass of neutral peptide Mr(calc): 1460.86

Variable modifications:

K1 : Methyl (K)

K10 : Methyl (K)

Ions Score: 45 Expect: 0.0028

Matches (**Bold Red**): 19/138 fragment ions using 53 most intense peaks

| #  | b       | b <sup>++</sup> | b <sup>*</sup> | b <sup>++</sup> | b <sup>0</sup> | b <sup>0++</sup> | Seq. | y       | y <sup>++</sup> | y <sup>*</sup> | y <sup>++</sup> | y <sup>0</sup> | y <sup>0++</sup> | #  |
|----|---------|-----------------|----------------|-----------------|----------------|------------------|------|---------|-----------------|----------------|-----------------|----------------|------------------|----|
| 1  | 143.12  | 72.06           | 126.09         | 63.55           |                |                  | K    |         |                 |                |                 |                |                  | 14 |
| 2  | 230.15  | 115.58          | 213.12         | 107.07          | 212.14         | 106.57           | S    | 1319.75 | 660.38          | 1302.73        | 651.87          | 1301.74        | 651.38           | 13 |
| 3  | 301.19  | 151.10          | 284.16         | 142.58          | 283.18         | 142.09           | A    | 1232.72 | 616.86          | 1215.70        | 608.35          | 1214.71        | 607.86           | 12 |
| 4  | 398.24  | 199.62          | 381.21         | 191.11          | 380.23         | 190.62           | P    | 1161.69 | 581.35          | 1144.66        | 572.83          | 1143.67        | 572.34           | 11 |
| 5  | 469.28  | 235.14          | 452.25         | 226.63          | 451.27         | 226.14           | A    | 1064.63 | 532.82          | 1047.61        | 524.31          | 1046.62        | 523.81           | 10 |
| 6  | 570.32  | 285.67          | 553.30         | 277.15          | 552.31         | 276.66           | T    | 993.60  | 497.30          | 976.57         | 488.79          | 975.58         | 488.30           | 9  |
| 7  | 627.35  | 314.18          | 610.32         | 305.66          | 609.34         | 305.17           | G    | 892.55  | 446.78          | 875.52         | 438.26          |                |                  | 8  |
| 8  | 684.37  | 342.69          | 667.34         | 334.17          | 666.36         | 333.68           | G    | 835.53  | 418.27          | 818.50         | 409.75          |                |                  | 7  |
| 9  | 783.44  | 392.22          | 766.41         | 383.71          | 765.43         | 383.22           | V    | 778.50  | 389.76          | 761.48         | 381.24          |                |                  | 6  |
| 10 | 925.55  | 463.28          | 908.52         | 454.76          | 907.54         | 454.27           | K    | 679.44  | 340.22          | 662.41         | 331.71          |                |                  | 5  |
| 11 | 1053.64 | 527.32          | 1036.61        | 518.81          | 1035.63        | 518.32           | K    | 537.33  | 269.17          | 520.30         | 260.65          |                |                  | 4  |
| 12 | 1150.69 | 575.85          | 1133.67        | 567.34          | 1132.68        | 566.85           | P    | 409.23  | 205.12          | 392.20         | 196.61          |                |                  | 3  |
| 13 | 1287.75 | 644.38          | 1270.73        | 635.87          | 1269.74        | 635.37           | H    | 312.18  | 156.59          | 295.15         | 148.08          |                |                  | 2  |
| 14 |         |                 |                |                 |                |                  | R    | 175.12  | 88.06           | 158.09         | 79.55           |                |                  | 1  |

# K<sub>me1</sub>SAPATGGVK<sub>me2</sub>KPHR

## H3K27, K36

MS/MS Fragmentation of **KSAPATGGVKKPHR**

Found in **gi|31742503**, histone H3.2 [Homo sapiens]

Match to Query 19626: 1474.871254 from(738.442903,2+)

From data file HelaHistoneH3\_CrotonyIP.dta

Click mouse within plot area to zoom in by factor of two about that po

Or, Plot from  to  Da

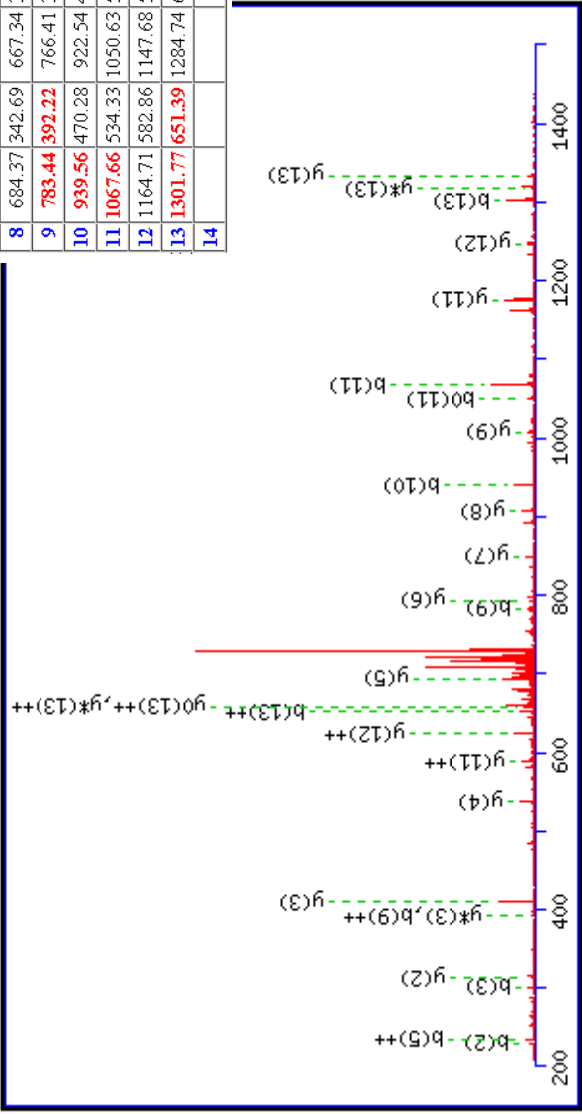

Monoisotopic mass of neutral peptide Mr(calc): 1474.87

Variable modifications:

K1 : Methyl (K)

K10 : Dimethyl (K)

Ions Score: 49 Expect: 0.0037

Matches (**Bold Red**): 27/138 fragment ions using 89 most intense peaks

| #  | b              | b <sup>++</sup> | b <sup>*</sup> | b <sup>++</sup> | b <sup>0</sup> | b <sup>0++</sup> | Seq. | y              | y <sup>++</sup> | y <sup>*</sup> | y <sup>++</sup> | y <sup>0</sup> | y <sup>0++</sup> | #  |
|----|----------------|-----------------|----------------|-----------------|----------------|------------------|------|----------------|-----------------|----------------|-----------------|----------------|------------------|----|
| 1  | 143.12         | 72.06           | 126.09         | 63.55           |                |                  | K    |                |                 |                |                 |                |                  | 14 |
| 2  | <b>230.15</b>  | 115.58          | 213.12         | 107.07          | 212.14         | 106.57           | S    | <b>1333.77</b> | 667.39          | <b>1316.74</b> | <b>658.88</b>   | 1315.76        | <b>658.38</b>    | 13 |
| 3  | <b>301.19</b>  | 151.10          | 284.16         | 142.58          | 283.18         | 142.09           | A    | <b>1246.74</b> | <b>623.87</b>   | 1229.71        | 615.36          | 1228.73        | 614.87           | 12 |
| 4  | 398.24         | 199.62          | 381.21         | 191.11          | 380.23         | 190.62           | P    | <b>1175.70</b> | <b>588.35</b>   | 1158.67        | 579.84          | 1157.69        | 579.35           | 11 |
| 5  | 469.28         | <b>235.14</b>   | 452.25         | 226.63          | 451.27         | 226.14           | A    | 1078.65        | 539.83          | 1061.62        | 531.31          | 1060.64        | 530.82           | 10 |
| 6  | 570.32         | 285.67          | 553.30         | 277.15          | 552.31         | 276.66           | T    | <b>1007.61</b> | 504.31          | 990.58         | 495.80          | 989.60         | 495.30           | 9  |
| 7  | 627.35         | 314.18          | 610.32         | 305.66          | 609.34         | 305.17           | G    | <b>906.56</b>  | 453.79          | 889.54         | 445.27          |                |                  | 8  |
| 8  | 684.37         | 342.69          | 667.34         | 334.17          | 666.36         | 333.68           | G    | <b>849.54</b>  | 425.27          | 832.52         | 416.76          |                |                  | 7  |
| 9  | <b>783.44</b>  | <b>392.22</b>   | 766.41         | 383.71          | 765.43         | 383.22           | V    | <b>792.52</b>  | 396.76          | 775.49         | 388.25          |                |                  | 6  |
| 10 | <b>939.56</b>  | 470.28          | 922.54         | 461.77          | 921.55         | 461.28           | K    | <b>693.45</b>  | 347.23          | 676.43         | 338.72          |                |                  | 5  |
| 11 | <b>1067.66</b> | 534.33          | 1050.63        | 525.82          | <b>1049.65</b> | 525.33           | K    | <b>537.33</b>  | 269.17          | 520.30         | 260.65          |                |                  | 4  |
| 12 | 1164.71        | 582.86          | 1147.68        | 574.35          | 1146.70        | 573.85           | P    | <b>409.23</b>  | 205.12          | <b>392.20</b>  | 196.61          |                |                  | 3  |
| 13 | <b>1301.77</b> | <b>651.39</b>   | 1284.74        | 642.87          | 1283.76        | 642.38           | H    | <b>312.18</b>  | 156.59          | 295.15         | 148.08          |                |                  | 2  |
| 14 |                |                 |                |                 |                |                  | R    | 175.12         | 88.06           | 158.09         | 79.55           |                |                  | 1  |

pr-K<sub>me2</sub>SAPATGGVK<sub>pr</sub>

H3K27

R.KSAPATGGVK(+56)K (+1) - Mod : 28.00 at K(1) - Retention time : 47.86 min - Precursor m/z : 1055.61 - Precursor int. : 3040830.000 - Basepeak int. : 104681.000

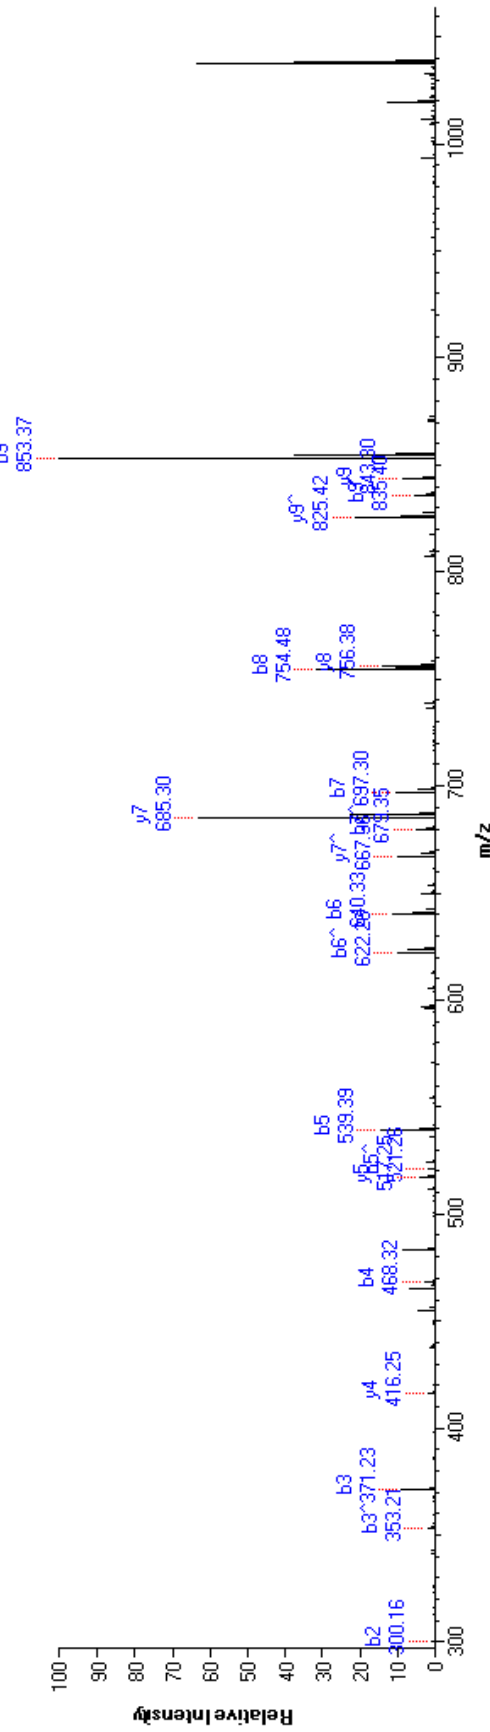

| (b) Seq (y) | b           | b*        | b^          | y           | y*       | y^          |
|-------------|-------------|-----------|-------------|-------------|----------|-------------|
| 1 K 10      | 213.1028    | 196.0762  | 195.0922    | 999.5263    | 982.4998 | 981.5157    |
| 2 S 9       | 300.1348 ** | 283.1083  | 282.1243    | 843.4313 ** | 826.4048 | 825.4208 ** |
| 3 A 8       | 371.1719 ** | 354.1454  | 353.1614 ** | 756.3994 ** | 739.3728 | 738.3888    |
| 4 P 7       | 468.2247 ** | 451.1982  | 450.2141    | 685.3622 ** | 668.3357 | 667.3517 ** |
| 5 A 6       | 539.2618 ** | 522.2352  | 521.2512 ** | 588.3094    | 571.2829 | 570.2989    |
| 6 T 5       | 640.3094 ** | 623.2830  | 622.2989 ** | 517.2723 ** | 500.2458 | 499.2618    |
| 7 G 4       | 697.3309 ** | 680.3044  | 679.3204 ** | 416.2247 ** | 399.1981 | 398.2141    |
| 8 G 3       | 754.3524 ** | 737.3259  | 736.3419    | 359.2032    | 342.1767 | 341.1927    |
| 9 V 2       | 853.4208 ** | 836.3943  | 835.4102 ** | 302.1818    | 285.1552 | 284.1712    |
| 10 K 1      | 1037.5157   | 1020.4892 | 1019.5052   | 203.1133    | 186.0868 | 185.1028    |

# K<sub>me2</sub>SAPATGGVK

# H3K27

MS/MS Fragmentation of **KSAPATGGVK**

Found in **gi|31742503**, histone H3.2 [Homo sapiens]

Match to Query 8633: 942.549354 from(472.281953,2+)

From data file HelaHistoneH3\_CrotonylIP.dta

Click mouse within plot area to zoom in by factor of two about that poi

Or, Plot from  to  Da

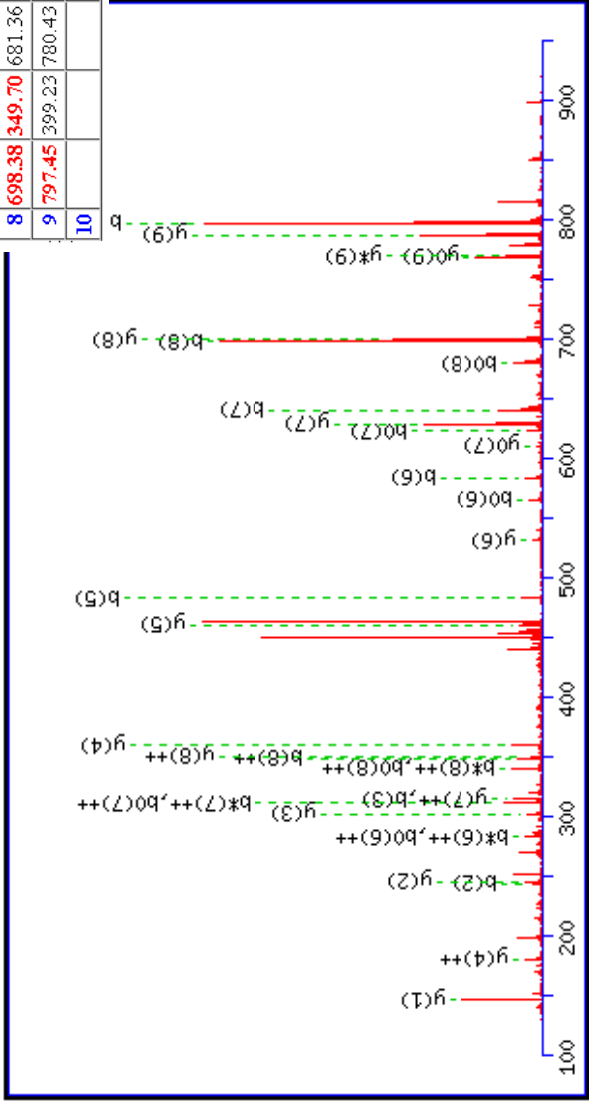

**Monoisotopic mass of neutral peptide Mr(calc): 942.55**

**Variable modifications:**

**K1** : Dimethyl1 (K)

**Ions Score:** 57 **Expect:** 0.00042

**Matches (Bold Red):** 32/98 fragment ions using 59 most intense peaks

| #  | b             | b <sup>++</sup> | b <sup>*</sup> | b <sup>+++</sup> | b <sup>0</sup> | b <sup>0++</sup> | Seq. | y             | y <sup>++</sup> | y <sup>*</sup> | y <sup>+++</sup> | y <sup>0</sup> | y <sup>0++</sup> | #  |
|----|---------------|-----------------|----------------|------------------|----------------|------------------|------|---------------|-----------------|----------------|------------------|----------------|------------------|----|
| 1  | 157.13        | 79.07           | 140.11         | 70.56            |                |                  | K    |               |                 |                |                  |                |                  | 10 |
| 2  | <b>244.17</b> | 122.59          | 227.14         | 114.07           | 226.15         | 113.58           | S    | <b>787.43</b> | 394.22          | <b>770.40</b>  | 385.71           | <b>769.42</b>  | 385.21           | 9  |
| 3  | <b>315.20</b> | 158.10          | 298.18         | 149.59           | 297.19         | 149.10           | A    | <b>700.40</b> | <b>350.70</b>   | 683.37         | 342.19           | 682.39         | 341.70           | 8  |
| 4  | 412.26        | 206.63          | 395.23         | 198.12           | 394.24         | 197.63           | P    | <b>629.36</b> | <b>315.18</b>   | 612.34         | 306.67           | <b>611.35</b>  | 306.18           | 7  |
| 5  | <b>483.29</b> | 242.15          | 466.27         | 233.64           | 465.28         | 233.14           | A    | <b>532.31</b> | 266.66          | 515.28         | 258.14           | 514.30         | 257.65           | 6  |
| 6  | <b>584.34</b> | 292.67          | 567.31         | <b>284.16</b>    | <b>566.33</b>  | <b>283.67</b>    | T    | <b>461.27</b> | 231.14          | 444.25         | 222.63           | 443.26         | 222.13           | 5  |
| 7  | <b>641.36</b> | 321.18          | 624.34         | <b>312.67</b>    | <b>623.35</b>  | <b>312.18</b>    | G    | <b>360.22</b> | <b>180.62</b>   | 343.20         | 172.10           |                |                  | 4  |
| 8  | <b>698.38</b> | <b>349.70</b>   | 681.36         | <b>341.18</b>    | <b>680.37</b>  | <b>340.69</b>    | G    | <b>303.20</b> | 152.10          | 286.18         | 143.59           |                |                  | 3  |
| 9  | <b>797.45</b> | 399.23          | 780.43         | 390.72           | 779.44         | 390.22           | V    | <b>246.18</b> | 123.59          | 229.15         | 115.08           |                |                  | 2  |
| 10 |               |                 |                |                  |                |                  | K    | <b>147.11</b> | 74.06           | 130.09         | 65.55            |                |                  | 1  |

# K<sub>me2</sub>SAPATGGVK<sub>me2</sub>KPHR

## H3K27, K36

MS/MS Fragmentation of **KSAPATGGVKKPHR**

Found in **gi|31742503**, histone H3.2 [Homo sapiens]

Match to Query 19800: 1488.886994 from(745.450773,2+)

From data file HelaHistoneH3\_CrotonylIP.dta

Click mouse within plot area to zoom in by factor of two about that point

Or, Plot from  to  Da

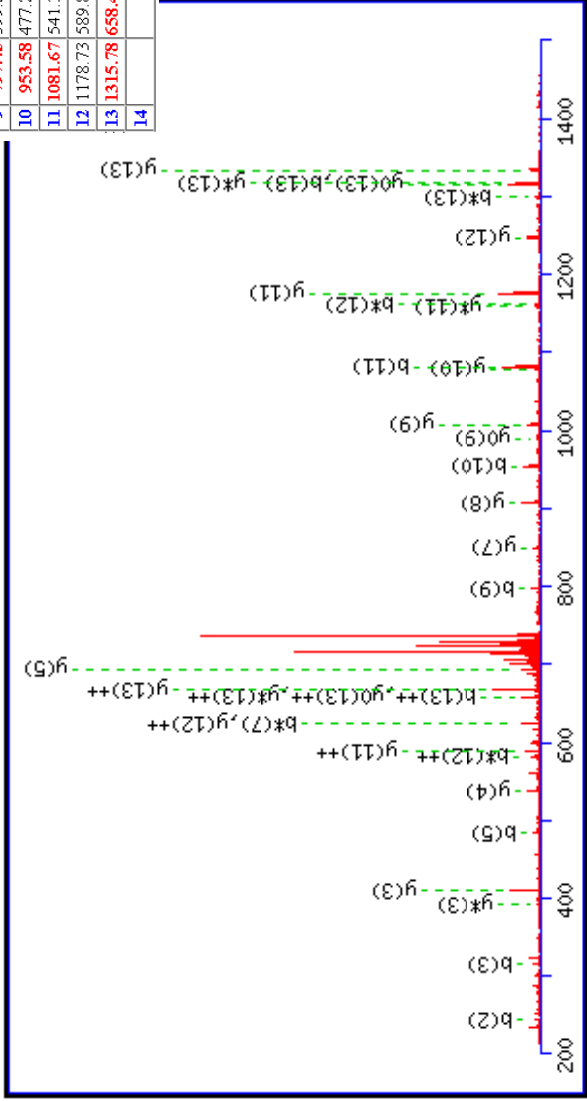

| #  | b       | b <sup>++</sup> | b <sup>*</sup> | b <sup>++</sup> | b <sup>0</sup> | b <sup>0++</sup> | Seq. | y       | y <sup>++</sup> | y <sup>*</sup> | y <sup>++</sup> | y <sup>0</sup> | y <sup>0++</sup> | #  |
|----|---------|-----------------|----------------|-----------------|----------------|------------------|------|---------|-----------------|----------------|-----------------|----------------|------------------|----|
| 1  | 157.13  | 79.07           | 140.11         | 70.56           |                |                  | K    |         |                 |                |                 |                |                  | 14 |
| 2  | 244.17  | 122.59          | 227.14         | 114.07          | 226.15         | 113.58           | S    | 1333.77 | 667.39          | 1316.74        | 658.88          | 1315.76        | 658.38           | 13 |
| 3  | 315.20  | 158.10          | 298.18         | 149.59          | 297.19         | 149.10           | A    | 1246.74 | 623.87          | 1229.71        | 615.36          | 1228.73        | 614.87           | 12 |
| 4  | 412.26  | 206.63          | 395.23         | 198.12          | 394.24         | 197.63           | P    | 1175.70 | 588.35          | 1158.67        | 579.84          | 1157.69        | 579.35           | 11 |
| 5  | 483.29  | 242.15          | 466.27         | 233.64          | 465.28         | 233.14           | A    | 1078.65 | 539.83          | 1061.62        | 531.31          | 1060.64        | 530.82           | 10 |
| 6  | 584.34  | 292.67          | 567.31         | 284.16          | 566.33         | 283.67           | T    | 1007.61 | 504.31          | 990.58         | 495.80          | 989.60         | 495.30           | 9  |
| 7  | 641.36  | 321.18          | 624.34         | 312.67          | 623.35         | 312.18           | G    | 906.56  | 453.79          | 889.54         | 445.27          |                |                  | 8  |
| 8  | 698.38  | 349.70          | 681.36         | 341.18          | 680.37         | 340.69           | G    | 849.54  | 425.27          | 832.52         | 416.76          |                |                  | 7  |
| 9  | 797.45  | 399.23          | 780.43         | 390.72          | 779.44         | 390.22           | V    | 792.52  | 396.76          | 775.49         | 388.25          |                |                  | 6  |
| 10 | 953.58  | 477.29          | 936.55         | 468.78          | 935.57         | 468.29           | K    | 693.45  | 347.23          | 676.43         | 338.72          |                |                  | 5  |
| 11 | 1081.67 | 541.34          | 1064.65        | 532.83          | 1063.66        | 532.33           | K    | 537.33  | 269.17          | 520.30         | 260.65          |                |                  | 4  |
| 12 | 1178.73 | 589.87          | 1161.70        | 581.35          | 1160.71        | 580.86           | P    | 409.23  | 205.12          | 392.20         | 196.61          |                |                  | 3  |
| 13 | 1315.78 | 658.40          | 1298.76        | 649.88          | 1297.77        | 649.39           | H    | 312.18  | 156.59          | 295.15         | 148.08          |                |                  | 2  |
| 14 |         |                 |                |                 |                |                  | R    | 175.12  | 88.06           | 158.09         | 79.55           |                |                  | 1  |

Monoisotopic mass of neutral peptide Mr(calc): 1488.89

Variable modifications:

K1 : Dimethyl (K)

K10 : Dimethyl (K)

Ions Score: 46 Expect: 0.0065

Matches (**Bold Red**): 32/138 fragment ions using 71 most intense peaks

pr-K<sub>ac</sub>SAPATGGVK<sub>pr</sub>

H3K27

R.KSAPATGGVK(+56)K<sub>1</sub>(+2) - Mod : 42.00 at K(1) - Retention time : 41.90 min - Precursor m/z : 535.32 - Precursor int. : 2238380.000 - Basepeak int. : 748767.000

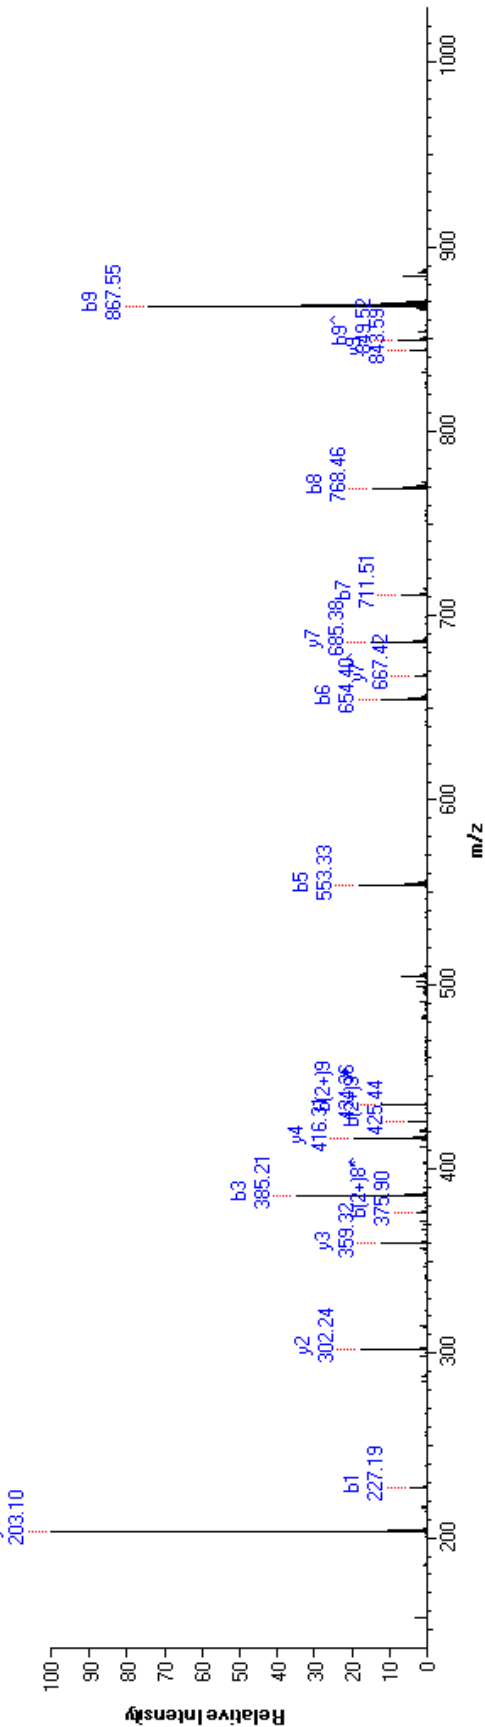

| (b) Seq (y) | b                      | b <sup>+</sup> | y                      | y <sup>+</sup> | y <sup>+</sup>         | b(2+)                  | b(2+) <sup>+</sup>     | y(2+)    | y(2+) <sup>+</sup> |
|-------------|------------------------|----------------|------------------------|----------------|------------------------|------------------------|------------------------|----------|--------------------|
| 1 K 10      | 227.1028 <sup>xx</sup> | 210.0762       | 1013.5263              | 996.4998       | 995.5157               | 0.0000                 | 0.0000                 | 507.2671 | 498.7538           |
| 2 S 9       | 314.1348               | 297.1083       | 843.4313 <sup>xx</sup> | 826.4048       | 825.4208               | 0.0000                 | 0.0000                 | 422.2196 | 413.7063           |
| 3 A 8       | 385.1719 <sup>xx</sup> | 368.1454       | 756.3994               | 739.3728       | 738.3888               | 0.0000                 | 0.0000                 | 378.7036 | 370.1903           |
| 4 P 7       | 482.2247               | 465.1982       | 685.3622 <sup>xx</sup> | 668.3357       | 667.3517 <sup>xx</sup> | 0.0000                 | 0.0000                 | 343.1850 | 334.6718           |
| 5 A 6       | 553.2618 <sup>xx</sup> | 536.2352       | 598.3094               | 571.2829       | 570.2989               | 0.0000                 | 0.0000                 | 0.0000   | 0.0000             |
| 6 T 5       | 654.3094 <sup>xx</sup> | 637.2830       | 517.2723               | 500.2458       | 499.2618               | 0.0000                 | 0.0000                 | 0.0000   | 0.0000             |
| 7 G 4       | 711.3309 <sup>xx</sup> | 694.3044       | 416.2247 <sup>xx</sup> | 399.1981       | 398.2141               | 356.1694               | 347.6561               | 0.0000   | 0.0000             |
| 8 G 3       | 768.3524 <sup>xx</sup> | 751.3259       | 359.2032 <sup>xx</sup> | 342.1767       | 341.1927               | 384.6801               | 376.1668 <sup>xx</sup> | 0.0000   | 0.0000             |
| 9 V 2       | 867.4208 <sup>xx</sup> | 850.3943       | 302.1818 <sup>xx</sup> | 285.1552       | 284.1712               | 434.2143 <sup>xx</sup> | 425.7010 <sup>xx</sup> | 0.0000   | 0.0000             |
| 10 K 1      | 1051.5157              | 1034.4893      | 203.1133 <sup>xx</sup> | 186.0868       | 185.1028               | 526.2618               | 517.7485               | 0.0000   | 0.0000             |

pr-K<sub>ac</sub>SAPATGGVK<sub>pm</sub> H3K27, K36

R.KSAPATGGVK(+70)K (+2) - Mod : 42.00 at K(1) - Retention time : 44.40 min - Precursor m/z : 542.33 - Precursor int. : 242699.000 - Basepeak int. : 167253.000

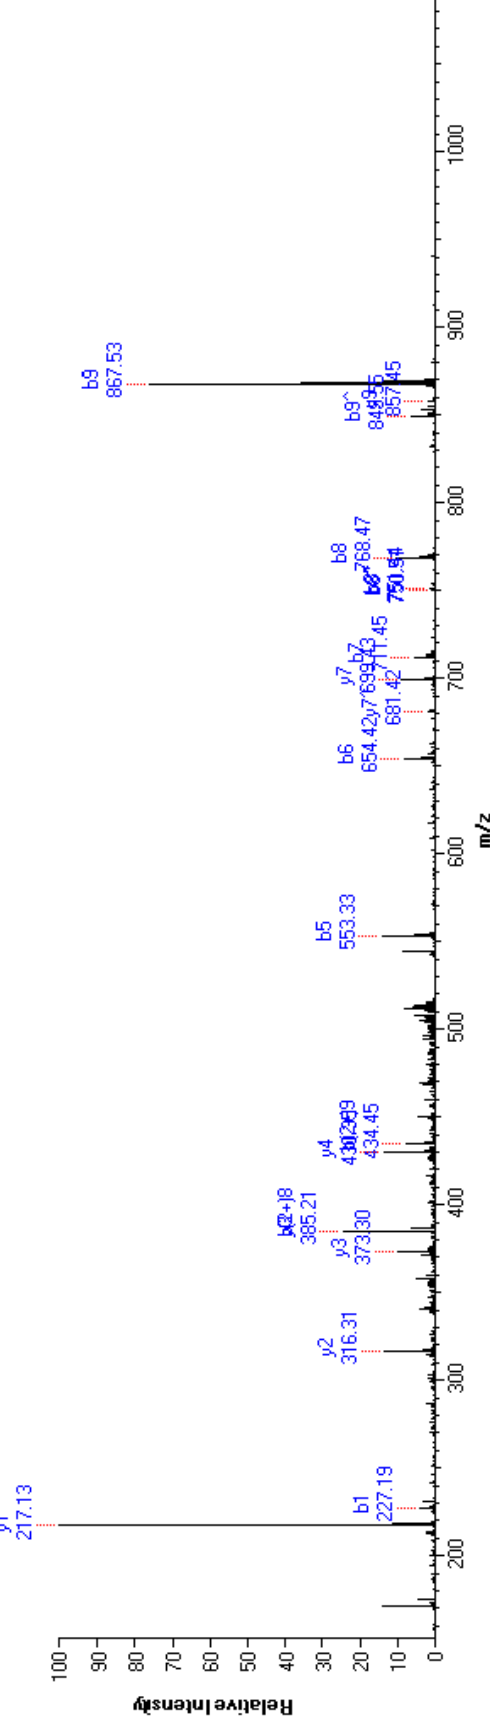

| (b) Seq (y) | b           | b*          | b^          | y           | y*        | y^          | b(2+)       | b(2+)*   | b(2+)^   | y(2+)       | y(2+)*   | y(2+)^   |
|-------------|-------------|-------------|-------------|-------------|-----------|-------------|-------------|----------|----------|-------------|----------|----------|
| 1 K 10      | 227.1028 ** | 210.0762    | 209.0922    | 1027.5264   | 1010.4998 | 1009.5157   | 0.0000      | 0.0000   | 0.0000   | 514.2671    | 505.7538 | 505.2618 |
| 2 S 9       | 314.1348    | 297.1083    | 296.1243    | 857.4313 ** | 840.4048  | 839.4208    | 0.0000      | 0.0000   | 0.0000   | 429.2196    | 420.7063 | 420.2143 |
| 3 A 8       | 385.1719 ** | 368.1454    | 367.1614    | 770.3994    | 753.3728  | 752.3888    | 0.0000      | 0.0000   | 0.0000   | 385.7036 ** | 377.1903 | 376.6983 |
| 4 P 7       | 482.2247    | 465.1982    | 464.2141    | 699.3622 ** | 682.3357  | 681.3517 ** | 0.0000      | 0.0000   | 0.0000   | 350.1850    | 341.6718 | 341.1797 |
| 5 A 6       | 553.2618 ** | 536.2352    | 535.2512    | 602.3094    | 585.2829  | 584.2989    | 0.0000      | 0.0000   | 0.0000   | 301.6586    | 0.0000   | 0.0000   |
| 6 T 5       | 654.3094 ** | 637.2830    | 636.2989    | 531.2723    | 514.2458  | 513.2618    | 327.6587    | 0.0000   | 0.0000   | 0.0000      | 0.0000   | 0.0000   |
| 7 G 4       | 711.3309 ** | 694.3044    | 693.3204    | 430.2247 ** | 413.1981  | 412.2141    | 356.1694    | 347.6561 | 347.1641 | 0.0000      | 0.0000   | 0.0000   |
| 8 G 3       | 768.3524 ** | 751.3259 ** | 750.3419 ** | 373.2032 ** | 356.1767  | 355.1927    | 384.6801    | 376.1668 | 375.6748 | 0.0000      | 0.0000   | 0.0000   |
| 9 V 2       | 867.4208 ** | 850.3943    | 849.4102 ** | 316.1818 ** | 299.1552  | 298.1712    | 434.2143 ** | 425.7010 | 425.2090 | 0.0000      | 0.0000   | 0.0000   |
| 10 K 1      | 1065.5157   | 1048.4893   | 1047.5052   | 217.1133 ** | 200.0868  | 199.1028    | 533.2618    | 524.7485 | 524.2565 | 0.0000      | 0.0000   | 0.0000   |

K<sub>ac</sub>SAPATGGVK

H3K27

MS/MS Fragmentation of **KSAPATGGVK**

Found in **gi|31742503**, histone H3.2 [Homo sapiens]

Match to Query 9167: 956.528534 from(479.271543,2+)

From data file HelaHistoneH3\_CrotonylIP.dta

Click mouse within plot area to zoom in by factor of two about that

Or, Plot from 100 to 1000 Da

| #  | b      | b <sup>++</sup> | b <sup>*</sup> | b <sup>+++</sup> | b <sup>0</sup> | b <sup>0++</sup> | Seq. | y      | y <sup>++</sup> | y <sup>*</sup> | y <sup>+++</sup> | y <sup>0</sup> | y <sup>0++</sup> | #  |
|----|--------|-----------------|----------------|------------------|----------------|------------------|------|--------|-----------------|----------------|------------------|----------------|------------------|----|
| 1  | 171.11 | 86.06           | 154.09         | 77.55            |                |                  | K    |        |                 |                |                  |                |                  | 10 |
| 2  | 258.14 | 129.58          | 241.12         | 121.06           | 240.13         | 120.57           | S    | 787.43 | 394.22          | 770.40         | 385.71           | 769.42         | 385.21           | 9  |
| 3  | 329.18 | 165.09          | 312.16         | 156.58           | 311.17         | 156.09           | A    | 700.40 | 350.70          | 683.37         | 342.19           | 682.39         | 341.70           | 8  |
| 4  | 426.23 | 213.62          | 409.21         | 205.11           | 408.22         | 204.62           | P    | 629.36 | 315.18          | 612.34         | 306.67           | 611.35         | 306.18           | 7  |
| 5  | 497.27 | 249.14          | 480.25         | 240.63           | 479.26         | 240.13           | A    | 532.31 | 266.66          | 515.28         | 258.14           | 514.30         | 257.65           | 6  |
| 6  | 598.32 | 299.66          | 581.29         | 291.15           | 580.31         | 290.66           | T    | 461.27 | 231.14          | 444.25         | 222.63           | 443.26         | 222.13           | 5  |
| 7  | 655.34 | 328.17          | 638.31         | 319.66           | 637.33         | 319.17           | G    | 360.22 | 180.62          | 343.20         | 172.10           |                |                  | 4  |
| 8  | 712.36 | 356.68          | 695.34         | 348.17           | 694.35         | 347.68           | G    |        | 152.10          | 286.18         | 143.59           |                |                  | 3  |
| 9  | 811.43 | 406.22          | 794.40         | 397.71           | 793.42         | 397.21           | V    | 246.18 | 123.59          | 229.15         | 115.08           |                |                  | 2  |
| 10 |        |                 |                |                  |                |                  | K    | 147.11 | 74.06           | 130.09         | 65.55            |                |                  | 1  |

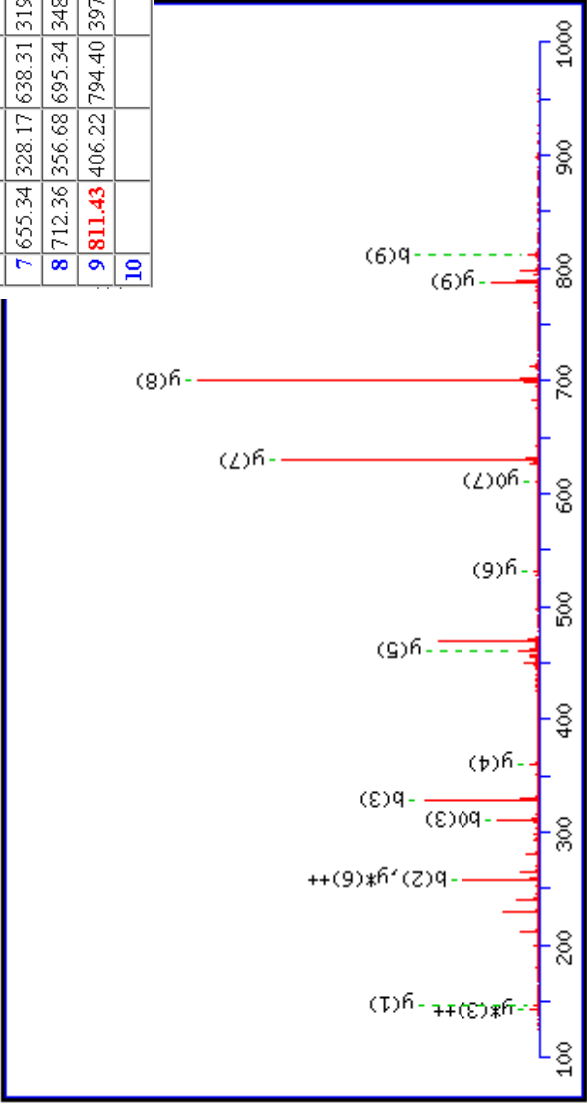

Monoisotopic mass of neutral peptide Mr(calc): 956.53

Variable modifications:

K1 : Acetyl (K)

Ions Score: 44 Expect: 0.004

Matches (**Bold Red**): 14/98 fragment ions using 43 most intense peaks

pr-SAPATGGVK<sub>pm</sub> H3K36

K.SAPATGGVK.K (+2) - Mod : 70.00 at K(9) - Retention time : 50.63 min ; Precursor m/z : 457.25 - Precursor int. : 362566.000 - Basepeak int. : 50789.100

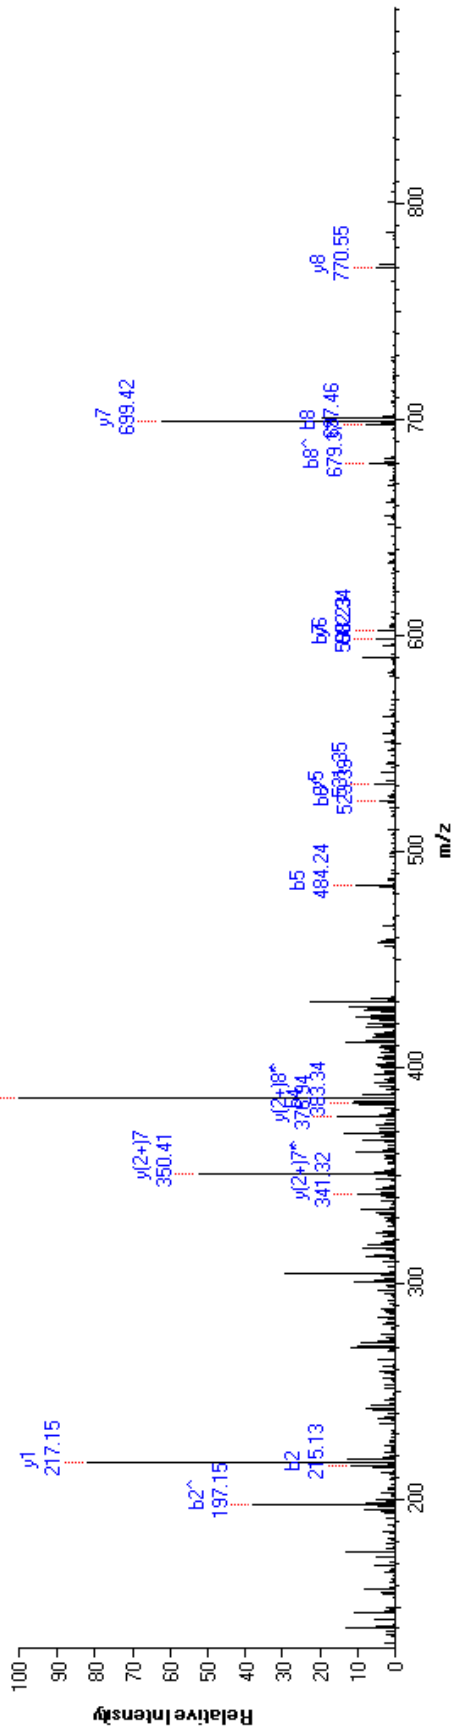

| (b) Seq (y) | b           | b <sup>+</sup> | b <sup>+</sup> | y           | y <sup>+</sup> | y <sup>+</sup> | y <sup>+</sup> | b(2+) <sup>+</sup> | b(2+) <sup>+</sup> | y(2+) <sup>+</sup> | y(2+) <sup>+</sup> |
|-------------|-------------|----------------|----------------|-------------|----------------|----------------|----------------|--------------------|--------------------|--------------------|--------------------|
| 1 S 9       | 144.0399    | 127.0133       | 126.0293       | 857.4313    | 840.4048       | 839.4208       | 0.0000         | 0.0000             | 429.2196           | 420.7063           | 420.2143           |
| 2 A 8       | 215.0770 ** | 198.0504       | 197.0664 **    | 770.3994 ** | 753.3728       | 752.3888       | 0.0000         | 0.0000             | 385.7036 **        | 377.1903 **        | 376.6983 **        |
| 3 P 7       | 312.1297    | 295.1032       | 294.1192       | 699.3622 ** | 682.3357       | 681.3517       | 0.0000         | 0.0000             | 350.1850 **        | 341.6718 **        | 341.1797 **        |
| 4 A 6       | 383.1668 ** | 366.1403       | 365.1563       | 602.3094 ** | 585.2829       | 584.2989       | 0.0000         | 0.0000             | 0.0000             | 0.0000             | 0.0000             |
| 5 T 5       | 484.2145 ** | 467.1880       | 466.2039       | 531.2723 ** | 514.2458       | 513.2618       | 0.0000         | 0.0000             | 0.0000             | 0.0000             | 0.0000             |
| 6 G 4       | 541.2360    | 524.2094       | 523.2254 **    | 430.2247    | 413.1981       | 412.2141       | 0.0000         | 0.0000             | 0.0000             | 0.0000             | 0.0000             |
| 7 G 3       | 598.2574 ** | 581.2309       | 580.2469       | 373.2032    | 356.1767       | 355.1927       | 0.0000         | 0.0000             | 0.0000             | 0.0000             | 0.0000             |
| 8 V 2       | 697.3259 ** | 680.2993       | 679.3153 **    | 316.1818    | 299.1552       | 298.1712       | 0.0000         | 0.0000             | 0.0000             | 0.0000             | 0.0000             |
| 9 K 1       | 895.4208    | 878.3943       | 877.4102       | 217.1133 ** | 200.0868       | 199.1028       | 448.2143       | 439.7010           | 0.0000             | 0.0000             | 0.0000             |





# YQK<sub>f0</sub>STELLIR

# H3K56

MS/MS Fragmentation of **YQKSTELLIR**  
Found in **gi|31742503**, histone H3.2 [Homo sapiens]  
Match to Query 16699: 1277.698034 from(639.856293,2+)  
From data file HelaHistoneH3\_CrotonylIP.dta

Click mouse within plot area to zoom in by factor of two about that po  
Or, Plot from  to  Da

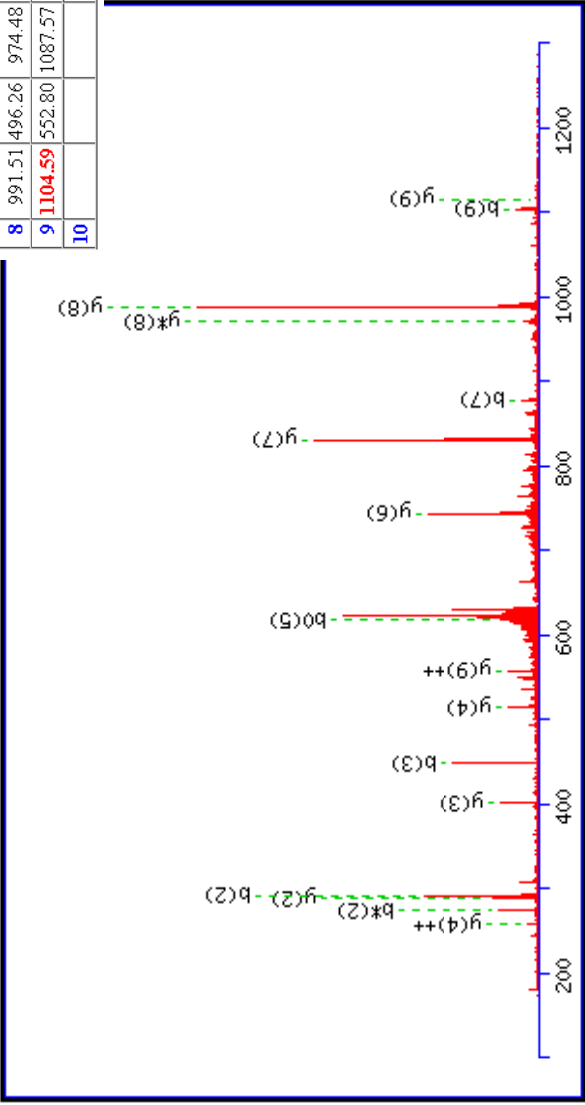

**Monoisotopic mass of neutral peptide Mr(calc): 1277.70**  
**Variable modifications:**  
K3 : Formyl (K)  
Ions Score: 40 Expect: 0.0066  
Matches (**Bold Red**): 16/92 fragment ions using 45 most intense peaks

| #  | b              | b <sup>++</sup> | b <sup>*</sup> | b <sup>+++</sup> | b <sup>0</sup> | b <sup>0++</sup> | Seq. | y              | y <sup>++</sup> | y <sup>*</sup> | y <sup>+++</sup> | y <sup>0</sup> | y <sup>0++</sup> | #  |
|----|----------------|-----------------|----------------|------------------|----------------|------------------|------|----------------|-----------------|----------------|------------------|----------------|------------------|----|
| 1  | 164.07         | 82.54           |                |                  |                |                  | Y    |                |                 |                |                  |                |                  | 10 |
| 2  | <b>292.13</b>  | 146.57          | <b>275.10</b>  | 138.05           |                |                  | Q    | <b>1115.64</b> | <b>558.32</b>   | 1098.62        | 549.81           | 1097.63        | 549.32           | 9  |
| 3  | <b>448.22</b>  | 224.61          | 431.19         | 216.10           |                |                  | K    | <b>987.58</b>  | 494.30          | <b>970.56</b>  | 485.78           | 969.57         | 485.29           | 8  |
| 4  | 535.25         | 288.13          | 518.22         | 259.62           | 517.24         | 259.12           | S    | <b>831.49</b>  | 416.25          | 814.47         | 407.74           | 813.48         | 407.25           | 7  |
| 5  | 636.30         | 318.65          | 619.27         | 310.14           | <b>618.29</b>  | 309.65           | T    | <b>744.46</b>  | 372.73          | 727.43         | 364.22           | 726.45         | 363.73           | 6  |
| 6  | 765.34         | 383.17          | 748.31         | 374.66           | 747.33         | 374.17           | E    | 643.41         | 322.21          | 626.39         | 313.70           | 625.40         | 313.21           | 5  |
| 7  | <b>878.43</b>  | 439.72          | 861.40         | 431.20           | 860.41         | 430.71           | L    | <b>514.37</b>  | <b>257.69</b>   | 497.34         | 249.18           |                |                  | 4  |
| 8  | 991.51         | 496.26          | 974.48         | 487.75           | 973.50         | 487.25           | L    | <b>401.29</b>  | 201.15          | 384.26         | 192.63           |                |                  | 3  |
| 9  | <b>1104.59</b> | 552.80          | 1087.57        | 544.29           | 1086.58        | 543.80           | I    | <b>288.20</b>  | 144.61          | 271.18         | 136.09           |                |                  | 2  |
| 10 |                |                 |                |                  |                |                  | R    | 175.12         | 88.06           | 158.09         | 79.55            |                |                  | 1  |



pr-STELLIR<sub>me</sub>

H3K63

K.STELLIR.K (+1) - Mod : 14.00 at R(7) - Retention time : 60.03 min - Precursor m/z : 901.54 - Precursor int. : 100413000.000 - Basepeak int. : 977188.000

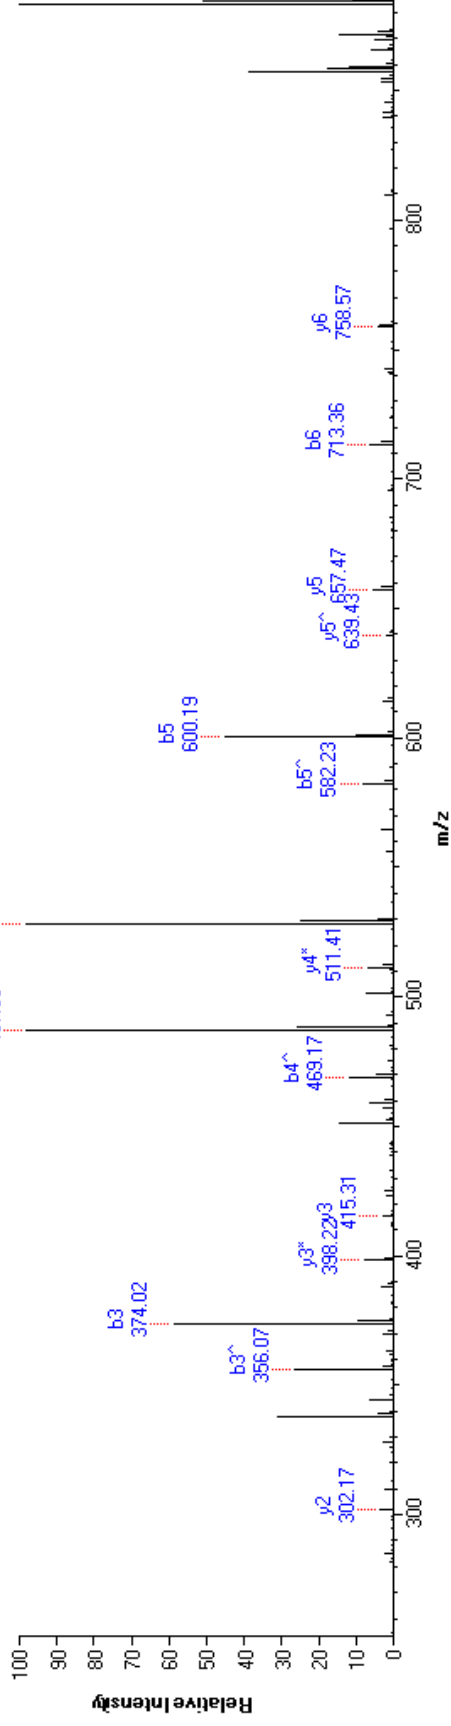

| (b) Seq (y) | b           | b <sup>+</sup> | y           | y <sup>+</sup> |
|-------------|-------------|----------------|-------------|----------------|
| 1 S 7       | 144.0399    | 127.0133       | 845.4940    | 827.4834       |
| 2 T 6       | 245.0875    | 228.0610       | 758.4620 ** | 740.4514       |
| 3 E 5       | 374.1301 ** | 357.1036       | 657.4142 ** | 639.4037 **    |
| 4 L 4       | 487.2142 ** | 470.1877       | 528.3717 ** | 510.3611       |
| 5 L 3       | 600.2982 ** | 583.2717       | 415.2876 ** | 397.2771       |
| 6 I 2       | 713.3823 ** | 696.3558       | 302.2036 ** | 284.1930       |
| 7 R 1       | 883.4834    | 866.4568       | 189.1195    | 171.1089       |

EIAQDFK<sub>me1</sub>

H3K79

R(E)AQDFK.T (+2) · Mod : 14.00 at K(7) · Retention time : 52.79 min · Precursor m/z : 432.73 · Precursor int. : 11678500.000 · Basepeak int. : 5904940.000

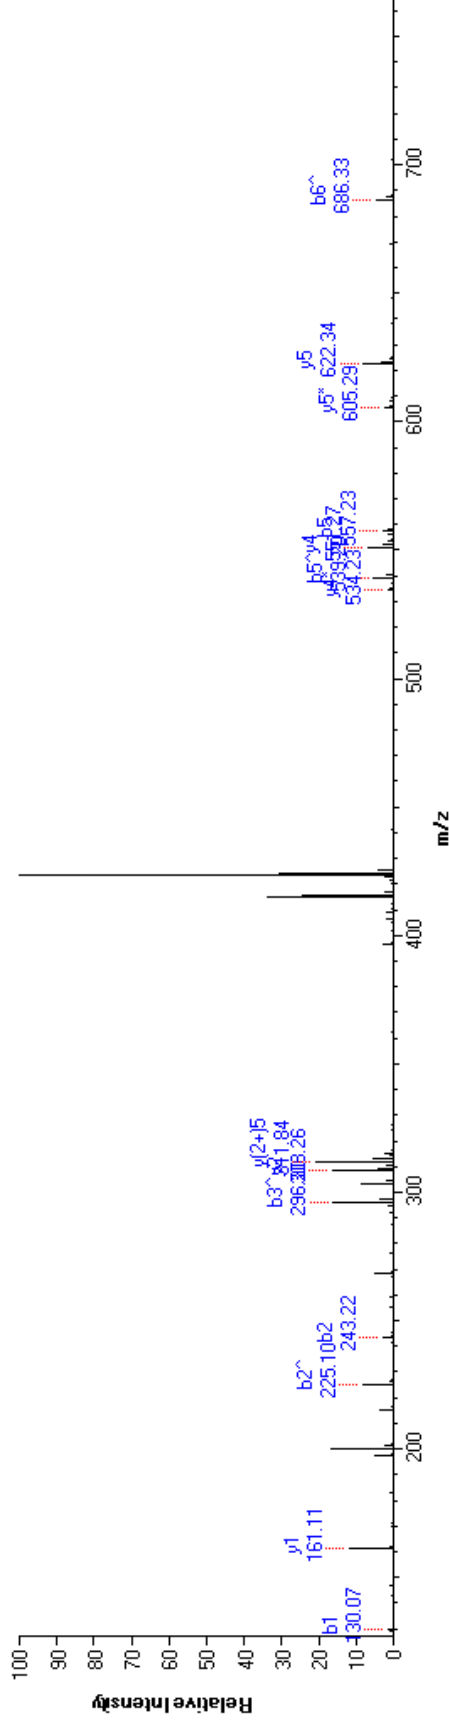

| [b] Seq (y) | b                      | b <sup>+</sup> | y                      | y <sup>+</sup>         | y <sup>+</sup> | b(2 <sup>+</sup> ) | b(2 <sup>+</sup> ) <sup>+</sup> | y(2 <sup>+</sup> )     | y(2 <sup>+</sup> ) <sup>+</sup> |
|-------------|------------------------|----------------|------------------------|------------------------|----------------|--------------------|---------------------------------|------------------------|---------------------------------|
| 1 E 7       | 130.0504 <sup>xx</sup> | 113.0239       | 864.4310               | 847.4045               | 846.4205       | 0.0000             | 0.0000                          | 432.7194               | 424.2061                        |
| 2 I 6       | 243.1345 <sup>xx</sup> | 226.1079       | 735.3884               | 718.3619               | 717.3779       | 0.0000             | 0.0000                          | 368.1981               | 359.6849                        |
| 3 A 5       | 314.1716               | 297.1451       | 622.3044 <sup>xx</sup> | 605.2778 <sup>xx</sup> | 604.2938       | 0.0000             | 0.0000                          | 311.6561 <sup>xx</sup> | 0.0000                          |
| 4 Q 4       | 442.2302               | 425.2036       | 551.2673 <sup>xx</sup> | 534.2407 <sup>xx</sup> | 533.2567       | 0.0000             | 0.0000                          | 0.0000                 | 0.0000                          |
| 5 D 3       | 557.2571 <sup>xx</sup> | 540.2306       | 423.2087               | 406.1822               | 405.1981       | 0.0000             | 0.0000                          | 0.0000                 | 0.0000                          |
| 6 F 2       | 704.3255               | 687.2990       | 308.1818 <sup>xx</sup> | 291.1552               | 290.1712       | 0.0000             | 0.0000                          | 0.0000                 | 0.0000                          |
| 7 K 1       | 846.4205               | 829.3939       | 161.1133 <sup>xx</sup> | 144.0868               | 143.1028       | 423.7141           | 415.2009                        | 0.0000                 | 0.0000                          |

EIAQDFK<sub>me1</sub>TDLR

H3K79

R:EIAQDFKTDLR.F (+1) - Mod : 14.00 at K(7) - Retention time : 56.82 min - Precursor m/z : 1349.70 - Precursor int. : 652915.000 - Basepeak int. : 234822.000

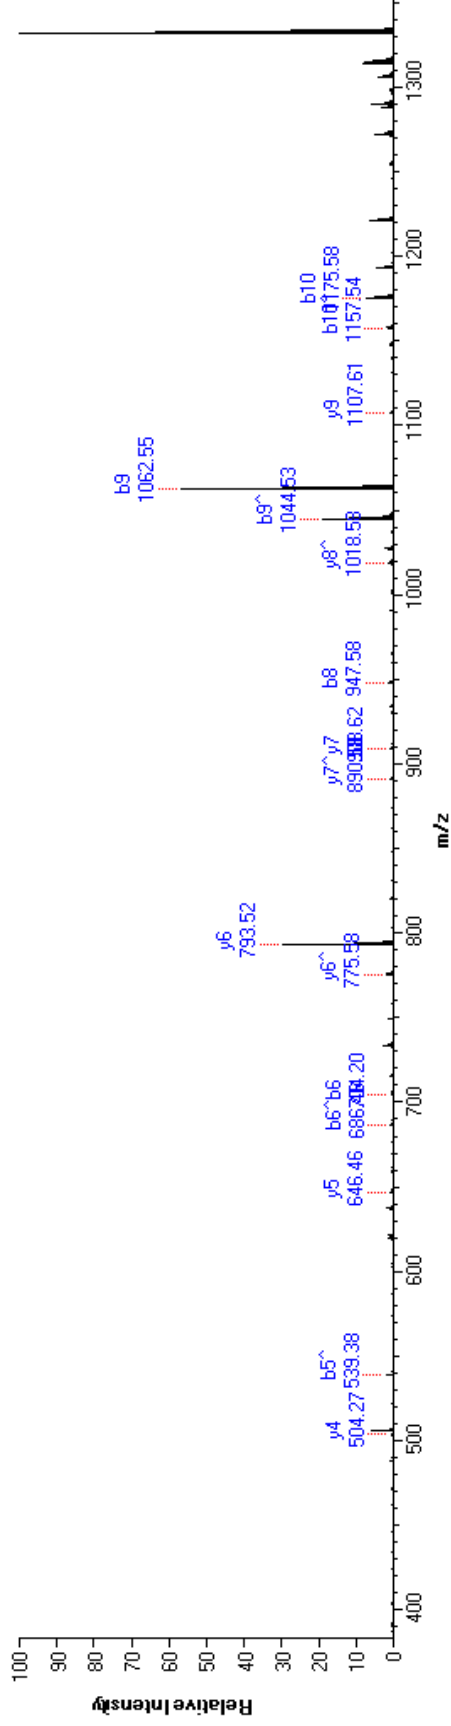

| [b] Seq (y) | b                       | b <sup>+</sup> | b <sup>+</sup>          | y                       | y <sup>+</sup> | y <sup>+</sup>          |
|-------------|-------------------------|----------------|-------------------------|-------------------------|----------------|-------------------------|
| 1 E 11      | 130.0504                | 113.0239       | 112.0399                | 1349.6908               | 1332.6643      | 1331.6803               |
| 2 I 10      | 243.1345                | 226.1079       | 225.1239                | 1220.6482               | 1203.6217      | 1202.6377               |
| 3 A 9       | 314.1716                | 297.1451       | 296.1610                | 1107.5642 <sup>xx</sup> | 1090.5376      | 1089.5536               |
| 4 Q 8       | 442.2302                | 425.2036       | 424.2196                | 1036.5271               | 1019.5005      | 1018.5165 <sup>xx</sup> |
| 5 D 7       | 557.2571                | 540.2306       | 539.2465 <sup>xx</sup>  | 908.4685 <sup>xx</sup>  | 891.4420       | 890.4579 <sup>xx</sup>  |
| 6 F 6       | 704.3255 <sup>xx</sup>  | 687.2990       | 686.3149 <sup>xx</sup>  | 793.4415 <sup>xx</sup>  | 776.4150       | 775.4310 <sup>xx</sup>  |
| 7 K 5       | 846.4205                | 829.3939       | 828.4099                | 646.3731 <sup>xx</sup>  | 629.3466       | 628.3625                |
| 8 T 4       | 947.4581 <sup>xx</sup>  | 930.4416       | 929.4576                | 504.2782 <sup>xx</sup>  | 487.2516       | 486.2676                |
| 9 D 3       | 1062.4951 <sup>xx</sup> | 1045.4685      | 1044.4845 <sup>xx</sup> | 403.2305                | 386.2039       | 385.2199                |
| 10 L 2      | 1175.5791 <sup>xx</sup> | 1158.5526      | 1157.5686 <sup>xx</sup> | 288.2036                | 271.1770       | 270.1930                |
| 11 R 1      | 1331.6803               | 1314.6537      | 1313.6697               | 175.1195                | 158.0930       | 157.1089                |

EIAQDFK<sub>me1</sub>TDLR

H3K79

R.EIAQDFK(+14)TDLR.F.(+2) - Mod : 0.04 at 0(-1) - Retention time : 63.74 min - Precursor m/z : 703.37 - Precursor int. : 392340.000 - Basepeak int. : 33504.900

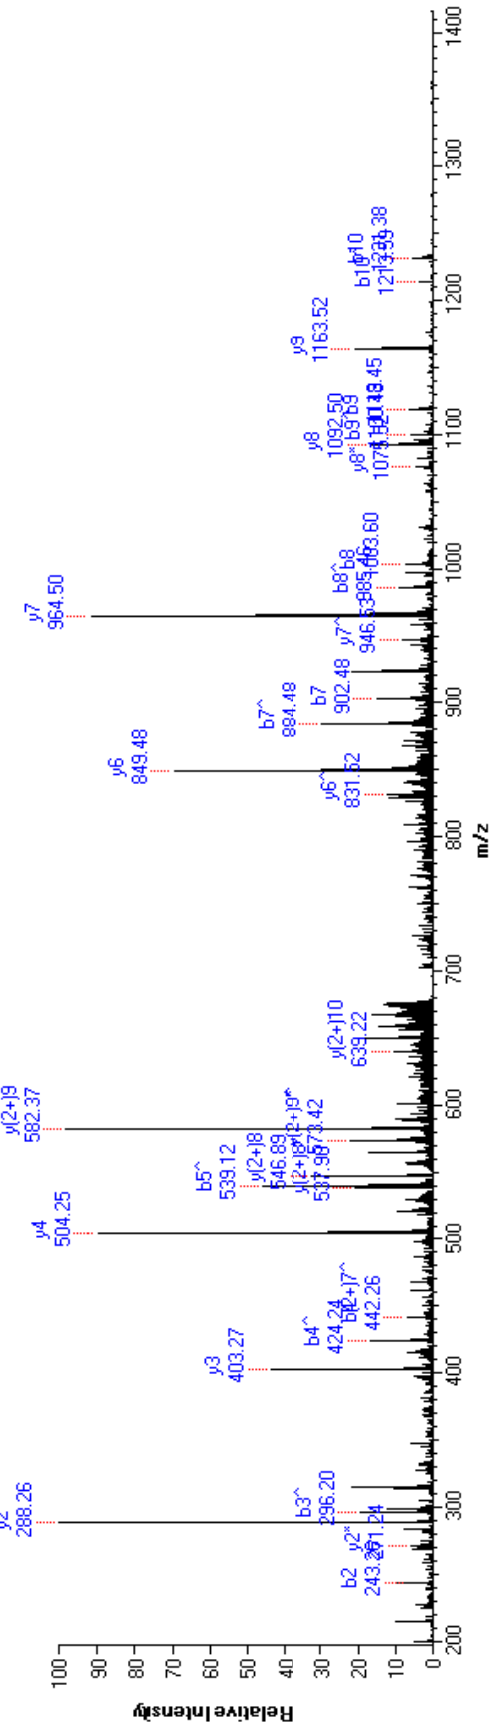

| (b) Seq (y) | b            | b*        | b <sup>+</sup> | y            | y*           | y <sup>+</sup> | b(2+)    | b(2+)*   | b(2+) <sup>+</sup> | y(2+)       | y(2+)*      | y(2+) <sup>+</sup> |
|-------------|--------------|-----------|----------------|--------------|--------------|----------------|----------|----------|--------------------|-------------|-------------|--------------------|
| 1 E 11      | 130.0504     | 113.0239  | 112.0399       | 1405.6908    | 1388.6643    | 1387.6803      | 0.0000   | 0.0000   | 0.0000             | 703.3493    | 694.8361    | 694.3441           |
| 2 I 10      | 243.1345 **  | 226.1079  | 225.1239       | 1276.6482    | 1259.6217    | 1258.6377      | 0.0000   | 0.0000   | 0.0000             | 638.8280 ** | 630.3148    | 629.8228           |
| 3 A 9       | 314.1716     | 297.1451  | 296.1610 **    | 1163.5642 ** | 1146.5376    | 1145.5536      | 0.0000   | 0.0000   | 0.0000             | 582.2860 ** | 573.7727 ** | 573.2807 **        |
| 4 Q 8       | 442.2302 **  | 425.2036  | 424.2196 **    | 1092.5271 ** | 1075.5005 ** | 1074.5165      | 0.0000   | 0.0000   | 0.0000             | 546.7675 ** | 538.2542 ** | 537.7621 **        |
| 5 D 7       | 557.2571     | 540.2306  | 539.2465 **    | 964.4685 **  | 947.4420     | 946.4579 **    | 0.0000   | 0.0000   | 0.0000             | 482.7382    | 474.2249    | 473.7329           |
| 6 F 6       | 704.3255     | 687.2990  | 686.3149       | 849.4415     | 832.4150     | 831.4310 **    | 0.0000   | 0.0000   | 0.0000             | 425.2247    | 416.7114    | 416.2194           |
| 7 K 5       | 902.4205 **  | 885.3939  | 884.4099 **    | 702.3731     | 685.3466     | 684.3625       | 451.7141 | 443.2009 | 442.7089 **        | 351.6905    | 343.1772    | 342.6852           |
| 8 T 4       | 1003.4681 ** | 986.4416  | 985.4576 **    | 504.2782 **  | 487.2516     | 486.2676       | 502.2380 | 493.7247 | 493.2327           | 0.0000      | 0.0000      | 0.0000             |
| 9 D 3       | 1118.4951 ** | 1101.4685 | 1100.4845 **   | 403.2305 **  | 386.2039     | 385.2199       | 559.7515 | 551.2382 | 550.7462           | 0.0000      | 0.0000      | 0.0000             |
| 10 L 2      | 1231.5791 ** | 1214.5526 | 1213.5686 **   | 288.2036 **  | 271.1770 **  | 270.1930       | 616.2935 | 607.7802 | 607.2882           | 0.0000      | 0.0000      | 0.0000             |
| 11 R 1      | 1387.6803    | 1370.6537 | 1369.6697      | 175.1195     | 158.0930     | 157.1089       | 694.3441 | 685.8307 | 685.3387           | 0.0000      | 0.0000      | 0.0000             |

H3K79

pr-EIAQDFK<sub>me2</sub>TDLR

R.EIAQDFKTDLR.F (+2) - Mod : 28.00 at K(7) - Retention time : 56.82 min - Precursor m/z : 710.38 - Precursor int. : 3395870.000 - Basepeak int. : 153812.000

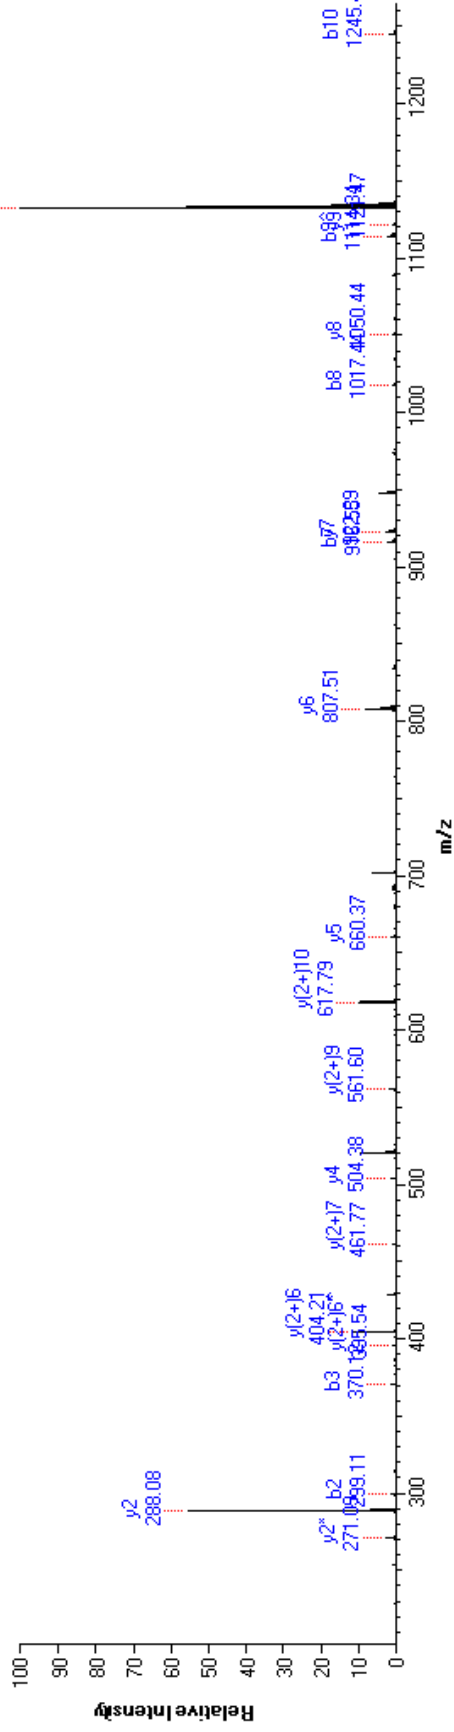

| [b] Seq (y) | b            | b*        | b^           | y            | y*          | y^        | b(2+)    | b(2+)*   | y(2+)       | y(2+)*      | y(2+)^      |
|-------------|--------------|-----------|--------------|--------------|-------------|-----------|----------|----------|-------------|-------------|-------------|
| 1 E 11      | 186.0504     | 169.0239  | 168.0399     | 1363.6908    | 1346.6643   | 1345.6803 | 0.0000   | 0.0000   | 682.3493    | 673.8361    | 673.3441    |
| 2 I 10      | 299.1345 **  | 282.1079  | 281.1239     | 1234.6482    | 1217.6217   | 1216.6377 | 0.0000   | 0.0000   | 617.8280 ** | 609.3148    | 608.8228    |
| 3 A 9       | 370.1716 **  | 353.1451  | 352.1610     | 1121.5642 ** | 1104.5376   | 1103.5536 | 0.0000   | 0.0000   | 561.2860 ** | 552.7727    | 552.2807    |
| 4 Q 8       | 498.2302     | 481.2036  | 480.2196     | 1050.5271 ** | 1033.5005   | 1032.5165 | 0.0000   | 0.0000   | 525.7675    | 517.2542    | 516.7621    |
| 5 D 7       | 613.2571     | 596.2306  | 595.2465     | 922.4685 **  | 905.4420    | 904.4579  | 0.0000   | 0.0000   | 461.7382 ** | 453.2249    | 452.7329    |
| 6 F 6       | 760.3255     | 743.2990  | 742.3149     | 807.4415 **  | 790.4150    | 789.4310  | 0.0000   | 0.0000   | 404.2247 ** | 395.7114 ** | 395.2194 ** |
| 7 K 5       | 916.4205 **  | 899.3939  | 898.4099     | 660.3731 **  | 643.3466    | 642.3625  | 458.7141 | 450.2009 | 330.6905    | 322.1772    | 321.6852    |
| 8 T 4       | 1017.4681 ** | 1000.4416 | 999.4576     | 504.2782 **  | 487.2516    | 486.2676  | 509.2380 | 500.7247 | 0.0000      | 0.0000      | 0.0000      |
| 9 D 3       | 1132.4951 ** | 1115.4685 | 1114.4845 ** | 403.2305     | 386.2039    | 385.2199  | 566.7515 | 558.2382 | 0.0000      | 0.0000      | 0.0000      |
| 10 L 2      | 1245.5791 ** | 1228.5526 | 1227.5686    | 288.2036 **  | 271.1770 ** | 270.1930  | 623.2935 | 614.7802 | 0.0000      | 0.0000      | 0.0000      |
| 11 R 1      | 1401.6803    | 1384.6537 | 1383.6697    | 175.1195     | 158.0930    | 157.1089  | 701.3441 | 692.8307 | 0.0000      | 0.0000      | 0.0000      |

EIAQDFK<sub>f0</sub>TDLR

## H3K79

R.EIAQDFKTDLR.F (+2) - Mod : 28.00 at K(7) - Retention time : 62.36 min - Precursor m/z : 682.35 - Precursor int. : 1663240.000 - Basepeak int. : 105562.000

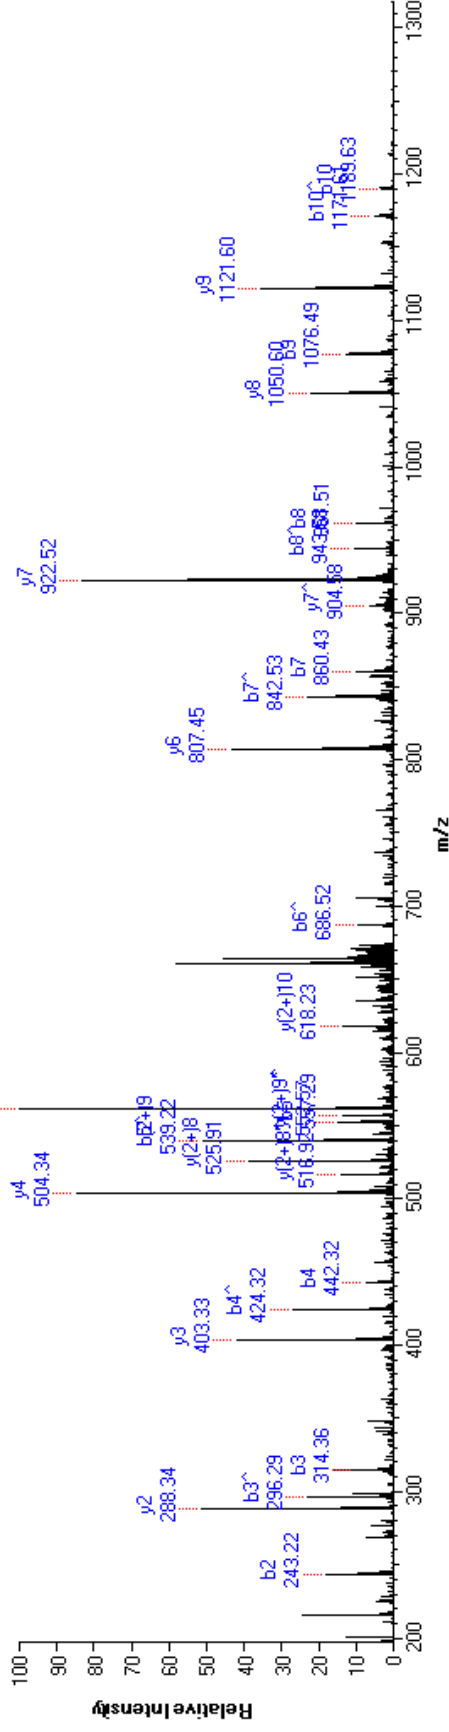

| [b] Seq (y) | b            | b*        | b <sup>+</sup> | y            | y*        | y <sup>+</sup> | b(2+)       | b(2+)*   | b(2+) <sup>+</sup> | y(2+)       | y(2+)*      | y(2+) <sup>+</sup> |
|-------------|--------------|-----------|----------------|--------------|-----------|----------------|-------------|----------|--------------------|-------------|-------------|--------------------|
| 1 E 11      | 130.0504     | 113.0239  | 112.0399       | 1363.6908    | 1346.6643 | 1345.6803      | 0.0000      | 0.0000   | 0.0000             | 682.3493    | 673.8361    | 673.3441           |
| 2 I 10      | 243.1345 **  | 226.1079  | 225.1239       | 1234.6482    | 1217.6217 | 1216.6377      | 0.0000      | 0.0000   | 0.0000             | 617.8280 ** | 609.3148    | 608.8228           |
| 3 A 9       | 314.1716 **  | 297.1451  | 296.1610 **    | 1121.5642 ** | 1104.5376 | 1103.5536      | 0.0000      | 0.0000   | 0.0000             | 561.2860 ** | 552.7727 ** | 552.2807 **        |
| 4 Q 8       | 442.2302 **  | 425.2036  | 424.2196 **    | 1050.5271 ** | 1033.5005 | 1032.5165      | 0.0000      | 0.0000   | 0.0000             | 525.7675 ** | 517.2542 ** | 516.7621 **        |
| 5 D 7       | 557.2571 **  | 540.2306  | 539.2465 **    | 922.4685 **  | 905.4420  | 904.4579 **    | 0.0000      | 0.0000   | 0.0000             | 461.7382    | 453.2249    | 452.7329           |
| 6 F 6       | 704.3255     | 687.2990  | 686.3149 **    | 807.4415 **  | 790.4150  | 789.4310       | 0.0000      | 0.0000   | 0.0000             | 404.2247    | 395.7114    | 395.2194           |
| 7 K 5       | 860.4205 **  | 843.3939  | 842.4099 **    | 680.3731     | 643.3466  | 642.3625       | 430.7141    | 422.2009 | 421.7089           | 330.6905    | 322.1772    | 321.6852           |
| 8 T 4       | 961.4681 **  | 944.4416  | 943.4576 **    | 504.2782 **  | 487.2516  | 486.2676       | 481.2380    | 472.7247 | 472.2327           | 0.0000      | 0.0000      | 0.0000             |
| 9 D 3       | 1076.4951 ** | 1059.4685 | 1058.4845      | 403.2305 **  | 386.2039  | 385.2199       | 538.7515 ** | 530.2382 | 529.7462           | 0.0000      | 0.0000      | 0.0000             |
| 10 L 2      | 1189.5791 ** | 1172.5526 | 1171.5686 **   | 288.2036 **  | 271.1770  | 270.1930       | 595.2935    | 586.7802 | 586.2882           | 0.0000      | 0.0000      | 0.0000             |
| 11 R 1      | 1345.6803    | 1328.6537 | 1327.6697      | 175.1195     | 158.0930  | 157.1089       | 673.3441    | 664.8307 | 664.3387           | 0.0000      | 0.0000      | 0.0000             |

# EIAQDFK<sub>ac</sub>TDLR

# H3K79

MS/MS Fragmentation of **EIAQDFKTDLR**

Found in **gi31742503**, histone H3.2 [Homo sapiens]

Match to Query 18423: 1376.694864 from(689.354708,2+)

From data file HelHistoneH3\_CrotonyIP.dta

Click mouse within plot area to zoom in by factor of two about that poi

Or, Plot from  to  Da

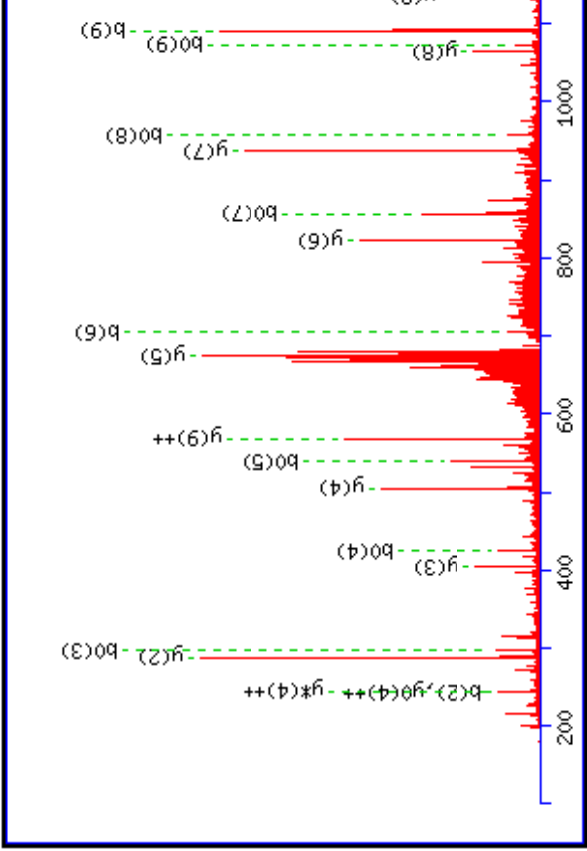

**Monoisotopic mass of neutral peptide Mr(calc): 1376.69**

**Variable modifications:**

**K7** : Acetyl (K)

**Ions Score:** 49 **Expect:** 0.0031

**Matches (Bold Red):** 23/110 fragment ions using 66 most intense peaks

| #         | b              | b <sup>++</sup> | b <sup>*</sup> | b <sup>+++</sup> | b <sup>0</sup> | b <sup>0++</sup> | Seq.     | y              | y <sup>++</sup> | y <sup>*</sup> | y <sup>+++</sup> | y <sup>0</sup> | y <sup>0++</sup> | #         |
|-----------|----------------|-----------------|----------------|------------------|----------------|------------------|----------|----------------|-----------------|----------------|------------------|----------------|------------------|-----------|
| <b>1</b>  | 130.05         | 65.53           |                |                  | 112.04         | 56.52            | <b>E</b> |                |                 |                |                  |                |                  | <b>11</b> |
| <b>2</b>  | <b>243.13</b>  | 122.07          |                |                  | 225.12         | 113.07           | <b>I</b> | <b>1248.66</b> | 624.83          | 1231.63        | 616.32           | 1230.65        | 615.83           | <b>10</b> |
| <b>3</b>  | 314.17         | 157.59          |                |                  | <b>296.16</b>  | 148.58           | <b>A</b> | <b>1135.57</b> | <b>568.29</b>   | 1118.55        | 559.78           | 1117.56        | 559.29           | <b>9</b>  |
| <b>4</b>  | 442.23         | 221.62          | 425.20         | 213.11           | <b>424.22</b>  | 212.61           | <b>Q</b> | <b>1064.54</b> | 532.77          | 1047.51        | 524.26           | 1046.53        | 523.77           | <b>8</b>  |
| <b>5</b>  | 557.26         | 279.13          | 540.23         | 270.62           | <b>539.25</b>  | 270.13           | <b>D</b> | <b>936.48</b>  | 468.74          | 919.45         | 460.23           | 918.47         | 459.74           | <b>7</b>  |
| <b>6</b>  | <b>704.32</b>  | 352.67          | 687.30         | 344.15           | 686.31         | 343.66           | <b>F</b> | <b>821.45</b>  | 411.23          | 804.43         | 402.72           | 803.44         | 402.22           | <b>6</b>  |
| <b>7</b>  | 874.43         | 437.72          | 857.40         | 429.21           | <b>856.42</b>  | 428.71           | <b>K</b> | <b>674.38</b>  | 337.70          | 657.36         | 329.18           | 656.37         | 328.69           | <b>5</b>  |
| <b>8</b>  | 975.48         | 488.24          | 958.45         | 479.73           | <b>957.47</b>  | 479.24           | <b>T</b> | <b>504.28</b>  | 252.64          | 487.25         | <b>244.13</b>    | 486.27         | <b>243.64</b>    | <b>4</b>  |
| <b>9</b>  | <b>1090.51</b> | 545.76          | 1073.48        | 537.24           | <b>1072.49</b> | 536.75           | <b>D</b> | <b>403.23</b>  | 202.12          | 386.20         | 193.61           | 385.22         | 193.11           | <b>3</b>  |
| <b>10</b> | <b>1203.59</b> | 602.30          | 1186.56        | 593.78           | <b>1185.58</b> | 593.29           | <b>L</b> | <b>288.20</b>  | 144.61          | 271.18         | 136.09           |                |                  | <b>2</b>  |
| <b>11</b> |                |                 |                |                  |                |                  | <b>R</b> | 175.12         | 88.06           | 158.09         | 79.55            |                |                  | <b>1</b>  |

pr-VTIPK<sub>pm</sub> H3K122

R.VTIPK.D (+1) · Mod : 70.00 at K(6) · Retention time : 76.28 min · Precursor m/z : 814.48 · Precursor int. : 830309.000 · Basepeak int. : 720715.000

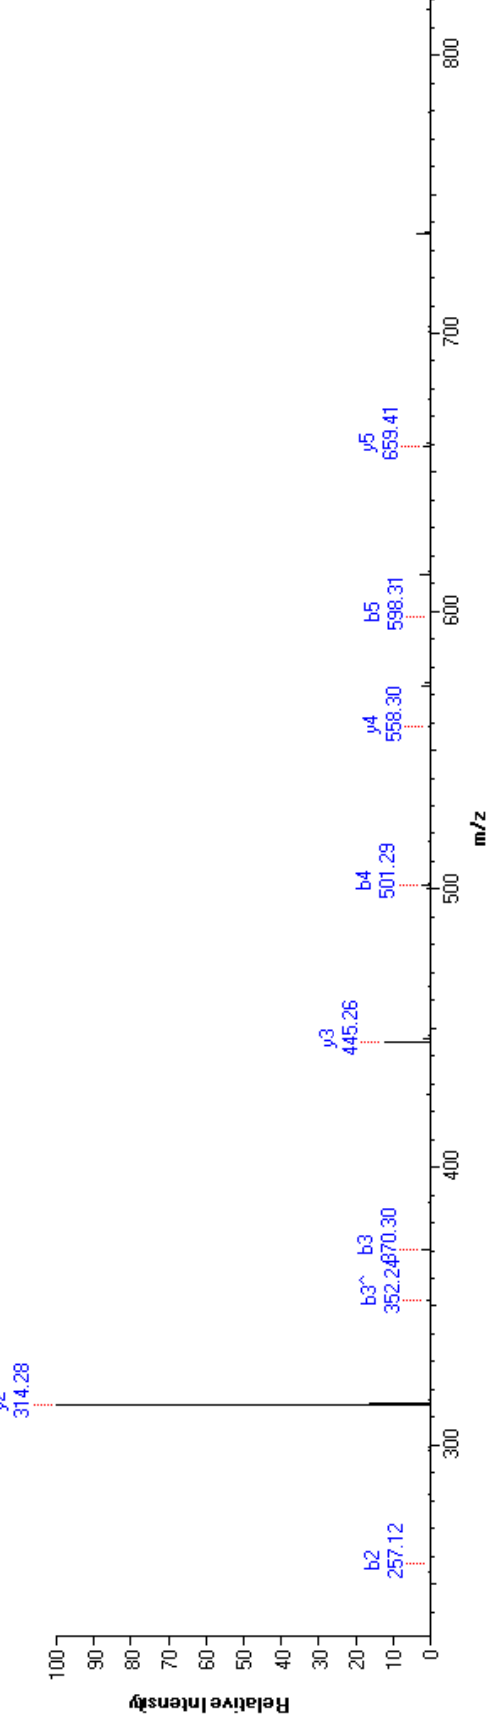

| [b] Seq (y) | b           | b <sup>+</sup> | b <sup>-</sup> | y           | y <sup>+</sup> | y <sup>-</sup> |
|-------------|-------------|----------------|----------------|-------------|----------------|----------------|
| 1 V 6       | 156.0762    | 139.0497       | 138.0657       | 758.4067    | 741.3802       | 740.3962       |
| 2 T 5       | 257.1239 ** | 240.0974       | 239.1134       | 659.3383 ** | 642.3118       | 641.3278       |
| 3 I 4       | 370.2080 ** | 353.1814       | 352.1974 **    | 558.2906 ** | 541.2641       | 540.2801       |
| 4 M 3       | 501.2485 ** | 484.2219       | 483.2379       | 445.2066 ** | 428.1801       | 427.1960       |
| 5 P 2       | 598.3012 ** | 581.2747       | 580.2906       | 314.1661 ** | 297.1396       | 296.1555       |
| 6 K 1       | 796.3962    | 779.3696       | 778.3856       | 217.1133    | 200.0868       | 199.1028       |
|             | (null)      | (null)         | (null)         | (null)      | (null)         | (null)         |

pr-VTIMPK<sub>ac</sub>DIQLAR

H3K122

MS/MS Fragmentation of VTIMPKDIQLAR

Found in gi|386772, histone H3 [Homo sapiens]

Match to Query 29888: 1481.822054 from(741.918303,2+)

From data file HistoneOffgfr8\_9.dta

Click mouse within plot area to zoom in by factor of two about that po

Or, Plot from 200 to 1500 Da

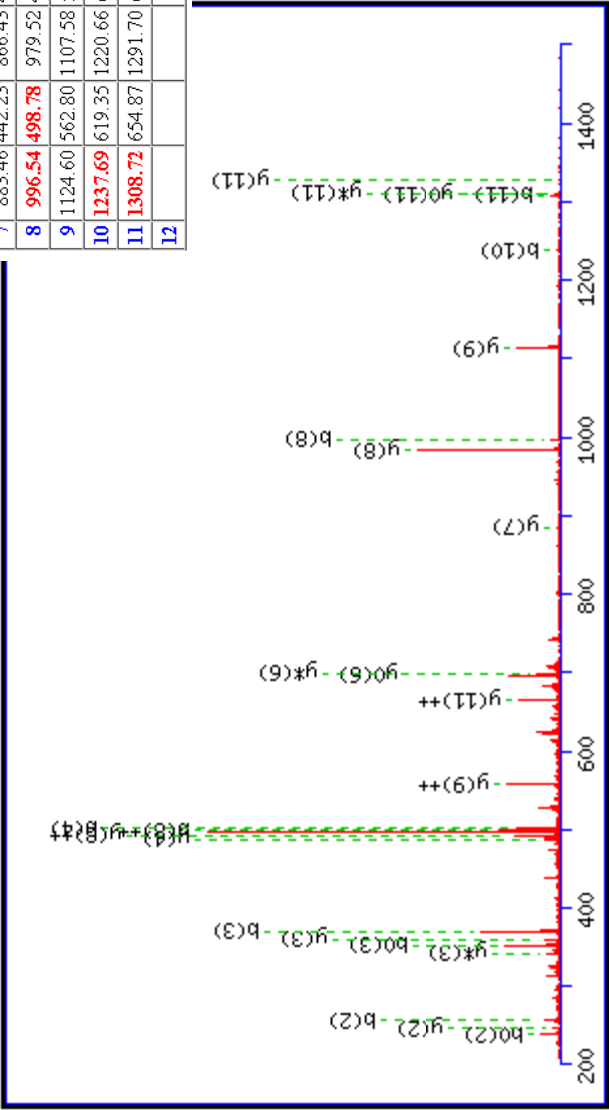

Monoisotopic mass of neutral peptide Mr(calc): 1481.83

Fixed modifications: Propionyl (N-term)

Variable modifications:

K6 : Acetyl (K)

Ions Score: 24 Expect: 0.6

Matches (Bold Red): 24/110 fragment ions using 89 most intense peaks

| #  | b       | b <sup>++</sup> | b <sup>*</sup> | b <sup>++</sup> | b <sup>+</sup> | b <sup>0</sup> | b <sup>0++</sup> | Seq. | y       | y <sup>++</sup> | y <sup>*</sup> | y <sup>++</sup> | y <sup>0</sup> | y <sup>0++</sup> | #  |
|----|---------|-----------------|----------------|-----------------|----------------|----------------|------------------|------|---------|-----------------|----------------|-----------------|----------------|------------------|----|
| 1  | 156.10  | 78.55           |                |                 |                |                |                  | V    |         |                 |                |                 |                |                  | 12 |
| 2  | 257.15  | 129.08          |                |                 | 239.14         | 120.07         |                  | T    | 1327.74 | 664.37          | 1310.71        | 655.86          | 1309.73        | 655.37           | 11 |
| 3  | 370.23  | 185.62          |                |                 | 352.22         | 176.62         |                  | I    | 1226.69 | 613.85          | 1209.67        | 605.34          | 1208.68        | 604.84           | 10 |
| 4  | 501.27  | 251.14          |                |                 | 483.26         | 242.14         |                  | M    | 1113.61 | 557.31          | 1096.58        | 548.79          | 1095.60        | 548.30           | 9  |
| 5  | 598.33  | 299.67          |                |                 | 580.32         | 290.66         |                  | P    | 982.57  | 491.79          | 965.54         | 483.27          | 964.56         | 482.78           | 8  |
| 6  | 768.43  | 384.72          | 751.41         | 376.21          | 750.42         | 375.71         |                  | K    | 885.52  | 443.26          | 868.49         | 434.75          | 867.50         | 434.26           | 7  |
| 7  | 883.46  | 442.23          | 866.43         | 433.72          | 865.45         | 433.23         |                  | D    | 715.41  | 358.21          | 698.38         | 349.70          | 697.40         | 349.20           | 6  |
| 8  | 996.54  | 498.78          | 979.52         | 490.26          | 978.53         | 489.77         |                  | I    | 600.38  | 300.70          | 583.36         | 292.18          |                |                  | 5  |
| 9  | 1124.60 | 562.80          | 1107.58        | 554.29          | 1106.59        | 553.80         |                  | Q    | 487.30  | 244.15          | 470.27         | 235.64          |                |                  | 4  |
| 10 | 1237.69 | 619.35          | 1220.66        | 610.83          | 1219.68        | 610.34         |                  | L    | 359.24  | 180.12          | 342.21         | 171.61          |                |                  | 3  |
| 11 | 1308.72 | 654.87          | 1291.70        | 646.35          | 1290.71        | 645.86         |                  | A    | 246.16  | 123.58          | 229.13         | 115.07          |                |                  | 2  |
| 12 |         |                 |                |                 |                |                |                  | R    | 175.12  | 88.06           | 158.09         | 79.55           |                |                  | 1  |

# VTIMPK<sub>f</sub>DIQLAR

# H3K122

MS/MS Fragmentation of **VTIMPKDIQLAR**  
Found in **gi|31742503**, histone H3.2 [Homo sapiens]  
Match to Query 18906: 1411.785554 from(706.900053,2+)  
From data file HelaHistoneH3\_CrotonylIP.dta

Click mouse within plot area to zoom in by factor of two about that po  
Or, Plot from  to  Da

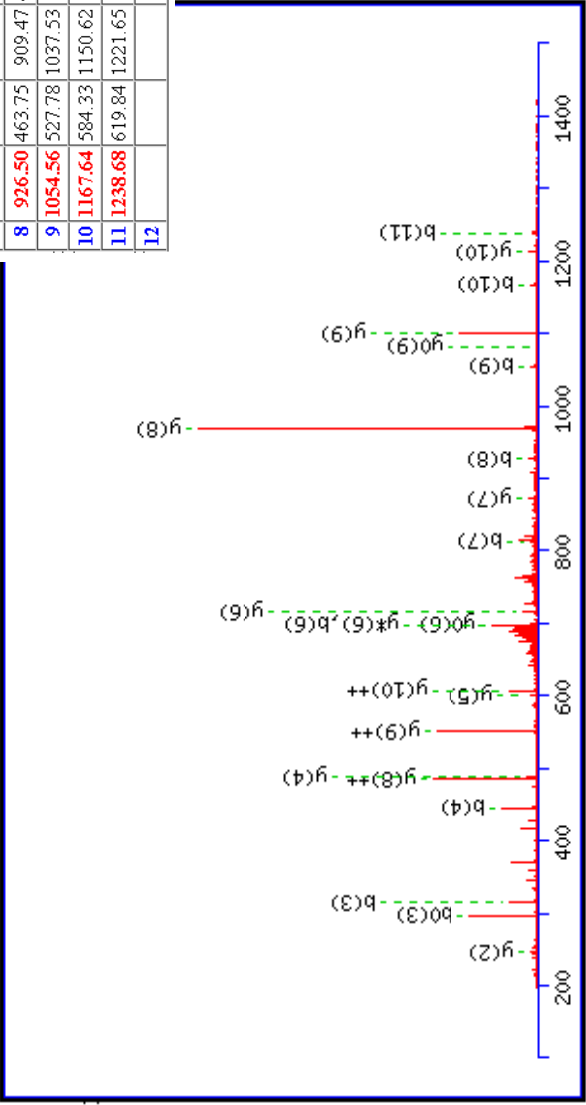

**Monoisotopic mass of neutral peptide Mr(calc): 1411.79**  
**Variable modifications:**  
**K6** : Formyl (K)  
**Ions Score: 43** **Expect: 0.0068**  
**Matches (Bold Red): 23/110** fragment ions using 56 most intense peaks

| #  | b              | b <sup>++</sup> | b <sup>*</sup> | b <sup>+++</sup> | b <sup>0</sup> | b <sup>0++</sup> | Seq. | y              | y <sup>++</sup> | y <sup>*</sup> | y <sup>+++</sup> | y <sup>0</sup> | y <sup>0++</sup> | #  |
|----|----------------|-----------------|----------------|------------------|----------------|------------------|------|----------------|-----------------|----------------|------------------|----------------|------------------|----|
| 1  | 100.08         | 50.54           |                |                  |                |                  | V    |                |                 |                |                  |                |                  | 12 |
| 2  | 201.12         | 101.07          |                |                  | 183.11         | 92.06            | T    | 1313.72        | 657.37          | 1296.70        | 648.85           | 1295.71        | 648.36           | 11 |
| 3  | <b>314.21</b>  | 157.61          |                |                  | <b>296.20</b>  | 148.60           | I    | <b>1212.68</b> | <b>606.84</b>   | 1195.65        | 598.33           | 1194.67        | 597.84           | 10 |
| 4  | <b>445.25</b>  | 223.13          |                |                  | 427.24         | 214.12           | M    | <b>1099.59</b> | <b>550.30</b>   | 1082.57        | 541.79           | <b>1081.58</b> | 541.29           | 9  |
| 5  | 542.30         | 271.65          |                |                  | 524.29         | 262.65           | P    | <b>968.55</b>  | <b>484.78</b>   | 951.53         | 476.27           | 950.54         | 475.77           | 8  |
| 6  | <b>698.39</b>  | 349.70          | 681.36         | 341.19           | 680.38         | 340.69           | K    | <b>871.50</b>  | 436.25          | 854.47         | 427.74           | 853.49         | 427.25           | 7  |
| 7  | <b>813.42</b>  | 407.21          | 796.39         | 398.70           | 795.41         | 398.21           | D    | <b>715.41</b>  | 358.21          | <b>698.38</b>  | 349.70           | <b>697.40</b>  | 349.20           | 6  |
| 8  | <b>926.50</b>  | 463.75          | 909.47         | 455.24           | 908.49         | 454.75           | I    | <b>600.38</b>  | 300.70          | 583.36         | 292.18           |                |                  | 5  |
| 9  | <b>1054.56</b> | 527.78          | 1037.53        | 519.27           | 1036.55        | 518.78           | Q    | <b>487.30</b>  | 244.15          | 470.27         | 235.64           |                |                  | 4  |
| 10 | <b>1167.64</b> | 584.33          | 1150.62        | 575.81           | 1149.63        | 575.32           | L    | 359.24         | 180.12          | 342.21         | 171.61           |                |                  | 3  |
| 11 | <b>1238.68</b> | 619.84          | 1221.65        | 611.33           | 1220.67        | 610.84           | A    | <b>246.16</b>  | 123.58          | 229.13         | 115.07           |                |                  | 2  |
| 12 |                |                 |                |                  |                |                  | R    | 175.12         | 88.06           | 158.09         | 79.55            |                |                  | 1  |

VTIM<sub>ox</sub>PK<sub>ac</sub>DIQLAR

H3K122

MS/MS Fragmentation of **VTIMPKDIQLAR**

Found in **gi386772**, histone H3 [Homo sapiens]

Match to Query 30077: 1497.818884 from(749.916718,2+)  
From data file HistoneOffgelf8\_9.dta

Click mouse within plot area to zoom in by factor of two about that poi  
Or, Plot from  to  Da

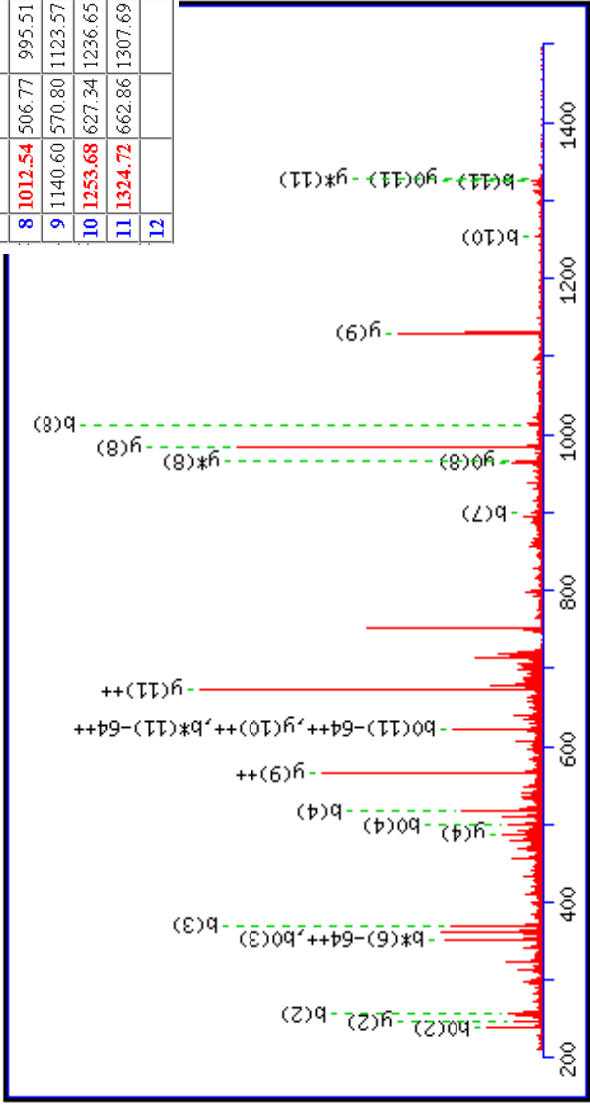

| #  | b              | b <sup>++</sup> | b <sup>*</sup> | b <sup>++</sup> | b <sup>0</sup> | b <sup>0++</sup> | Seq. | y              | y <sup>++</sup> | y <sup>*</sup> | y <sup>++</sup> | y <sup>0</sup> | y <sup>0++</sup> | #  |
|----|----------------|-----------------|----------------|-----------------|----------------|------------------|------|----------------|-----------------|----------------|-----------------|----------------|------------------|----|
| 1  | 156.10         | 78.55           |                |                 |                |                  | V    |                |                 |                |                 |                |                  | 12 |
| 2  | <b>257.15</b>  | 129.08          |                |                 | <b>239.14</b>  | 120.07           | T    | 1343.74        | <b>672.37</b>   | <b>1326.71</b> | 663.86          | <b>1325.72</b> | 663.37           | 11 |
| 3  | <b>370.23</b>  | 185.62          |                |                 | <b>352.22</b>  | 176.62           | I    | 1242.69        | <b>621.85</b>   | 1225.66        | 613.33          | 1224.68        | 612.84           | 10 |
| 4  | <b>517.27</b>  | 259.14          |                |                 | <b>499.26</b>  | 250.13           | M    | <b>1129.60</b> | <b>565.31</b>   | 1112.58        | 556.79          | 1111.59        | 556.30           | 9  |
| 5  | 614.32         | 307.66          |                |                 | 596.31         | 298.66           | P    | <b>982.57</b>  | 491.79          | <b>965.54</b>  | 483.27          | <b>964.56</b>  | 482.78           | 8  |
| 6  | 784.43         | 392.72          | 767.40         | 384.20          | 766.42         | 383.71           | K    | 885.52         | 443.26          | 888.49         | 434.75          | 867.50         | 434.26           | 7  |
| 7  | <b>899.45</b>  | 450.23          | 882.43         | 441.72          | 881.44         | 441.23           | D    | 715.41         | 358.21          | 698.38         | 349.70          | 697.40         | 349.20           | 6  |
| 8  | <b>1012.54</b> | 506.77          | 995.51         | 498.26          | 994.53         | 497.77           | I    | 600.38         | 300.70          | 583.36         | 292.18          |                |                  | 5  |
| 9  | 1140.60        | 570.80          | 1123.57        | 562.29          | 1122.59        | 561.80           | Q    | <b>487.30</b>  | 244.15          | 470.27         | 235.64          |                |                  | 4  |
| 10 | <b>1253.68</b> | 627.34          | 1236.65        | 618.83          | 1235.67        | 618.34           | L    | 359.24         | 180.12          | 342.21         | 171.61          |                |                  | 3  |
| 11 | <b>1324.72</b> | 662.86          | 1307.69        | 654.35          | 1306.71        | 653.86           | A    | <b>246.16</b>  | 123.58          | 229.13         | 115.07          |                |                  | 2  |
| 12 |                |                 |                |                 |                |                  | R    | 175.12         | 88.06           | 158.09         | 79.55           |                |                  | 1  |

**Monoisotopic mass of neutral peptide Mr(calc): 1497.82**  
**Fixed modifications:** Propionyl (N-term)  
**Variable modifications:**  
M4 : Oxidation (M), with neutral losses 0.00 (shown in table), 64.0  
K6 : Acetyl (K)  
Ions Score: 33 **Expect:** 0.079  
Matches (**Bold Red**): 24/172 fragment ions using 50 most intense peaks

pr-DIQLAR<sub>me1</sub>

H3K122

K.DIQLAR.R (+1) - Mod : 14.00 at R(6) - Retention time : 49.76 min - Precursor m/z : 785.45 - Precursor int. : 120243.000 - Basepeak int. : 75112.800

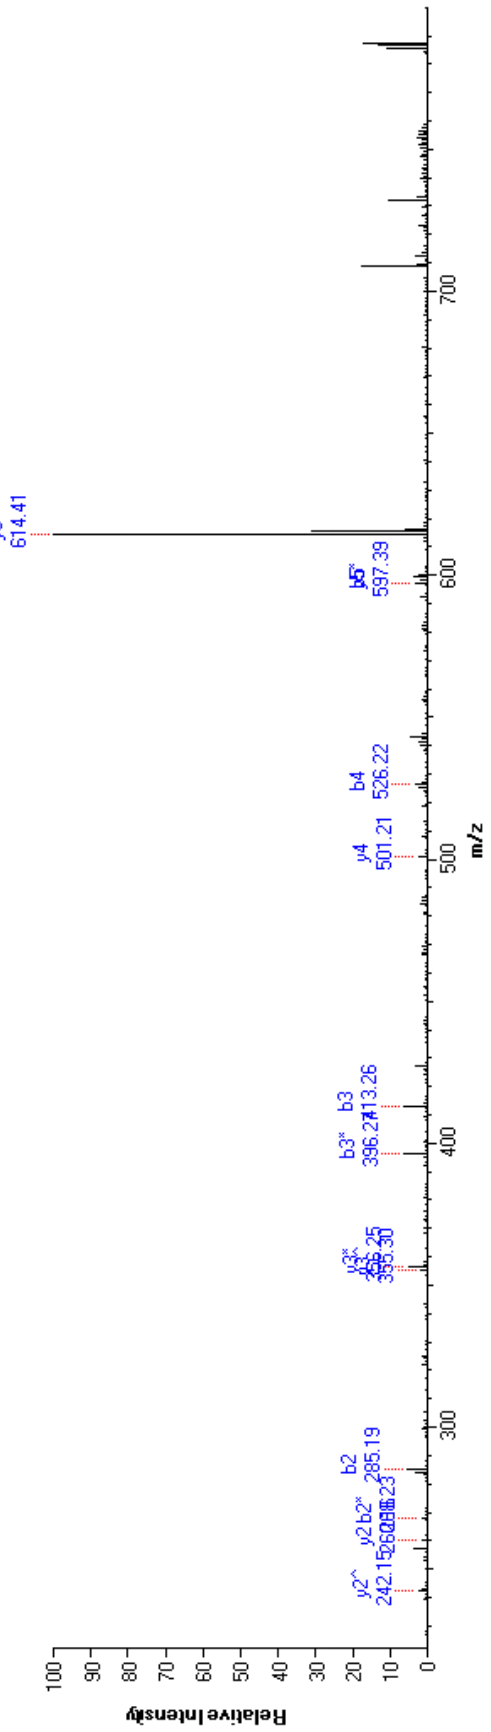

| [b] Seq (y) | b                       | b <sup>*</sup>          | b <sup>^</sup> | y                       | y <sup>*</sup>          | y <sup>^</sup>          |
|-------------|-------------------------|-------------------------|----------------|-------------------------|-------------------------|-------------------------|
| 1 D 6       | 172.0348                | 155.0082                | 154.0242       | 729.4102                | 712.3837                | 711.3997                |
| 2 I 5       | 285.1188 <sup>***</sup> | 268.0923 <sup>***</sup> | 267.1083       | 614.3833 <sup>***</sup> | 597.3568 <sup>***</sup> | 596.3727                |
| 3 Q 4       | 413.1774 <sup>***</sup> | 396.1509 <sup>***</sup> | 395.1668       | 501.2993 <sup>***</sup> | 484.2727                | 483.2887                |
| 4 L 3       | 526.2615 <sup>***</sup> | 509.2349                | 508.2509       | 373.2407                | 356.2141 <sup>***</sup> | 355.2301 <sup>***</sup> |
| 5 A 2       | 597.2986 <sup>***</sup> | 580.2720                | 579.2880       | 260.1566 <sup>***</sup> | 243.1301                | 242.1460 <sup>***</sup> |
| 6 R 1       | 767.3997                | 750.3732                | 749.3891       | 189.1195                | 172.0930                | 171.1089                |

GK<sub>ac</sub>GGK<sub>ac</sub>GLGK

H4K5, K8

MS/MS Fragmentation of **GKGGKGLGK**

Found in **gi28173560**, histone H4 [Homo sapiens]

Match to Query 3112: 884.506444 from(443.260498,2+)

From data file HelaHistoneH4\_CrotonylIP.dta

Click mouse within plot area to zoom in by factor of two about that point

Or, Plot from  to  Da

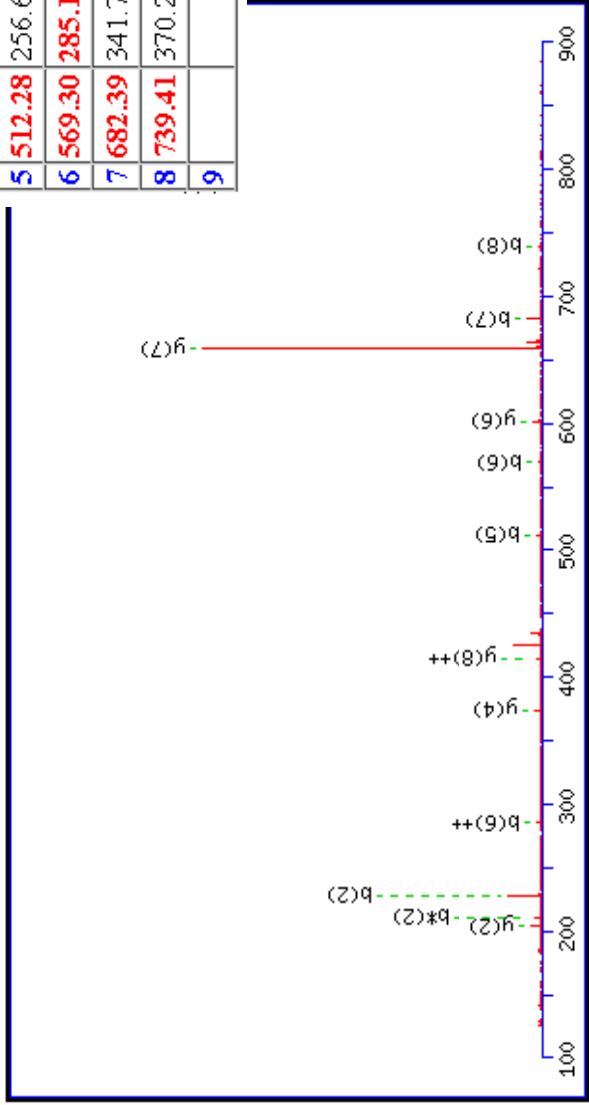

**Monoisotopic mass of neutral peptide Mr(calc) :** 884.51

**Variable modifications:**

**K2** : Acetyl1 (K)

**K5** : Acetyl1 (K)

**Ions Score:** 42 **Expect:** 0.011

**Matches (Bold Red):** 13/62 fragment ions using 27 most intense peaks

| # | b      | b <sup>++</sup> | b <sup>*</sup> | b <sup>++</sup> | Seq. | y      | y <sup>++</sup> | y <sup>*</sup> | y <sup>++</sup> | # |
|---|--------|-----------------|----------------|-----------------|------|--------|-----------------|----------------|-----------------|---|
| 1 | 58.03  | 29.52           |                |                 | G    |        |                 |                |                 | 9 |
| 2 | 228.13 | 114.57          | 211.11         | 106.06          | K    | 828.49 | 414.75          | 811.47         | 406.24          | 8 |
| 3 | 285.16 | 143.08          | 268.13         | 134.57          | G    | 658.39 | 329.70          | 641.36         | 321.18          | 7 |
| 4 | 342.18 | 171.59          | 325.15         | 163.08          | G    | 601.37 | 301.19          | 584.34         | 292.67          | 6 |
| 5 | 512.28 | 256.65          | 495.26         | 248.13          | K    | 544.35 | 272.68          | 527.32         | 264.16          | 5 |
| 6 | 569.30 | 285.16          | 552.28         | 276.64          | G    | 374.24 | 187.62          | 357.21         | 179.11          | 4 |
| 7 | 682.39 | 341.70          | 665.36         | 333.18          | L    | 317.22 | 159.11          | 300.19         | 150.60          | 3 |
| 8 | 739.41 | 370.21          | 722.38         | 361.70          | G    | 204.13 | 102.57          | 187.11         | 94.06           | 2 |
| 9 |        |                 |                |                 | K    | 147.11 | 74.06           | 130.09         | 65.55           | 1 |

GK<sub>ac</sub>GGK<sub>ac</sub>GLGK<sub>ac</sub>GGAK

H4K5, K8, K12

MS/MS Fragmentation of **GKGGKGLGKGGAK**

Found in **gi|28173560**, histone H4 [Homo sapiens]

Match to Query 18062: 1239.691194 from(620.852873,2+)

From data file HelaHistoneH4\_CrotonylIP.dta

Click mouse within plot area to zoom in by factor of two about that point  
Or, Plot from  to  Da

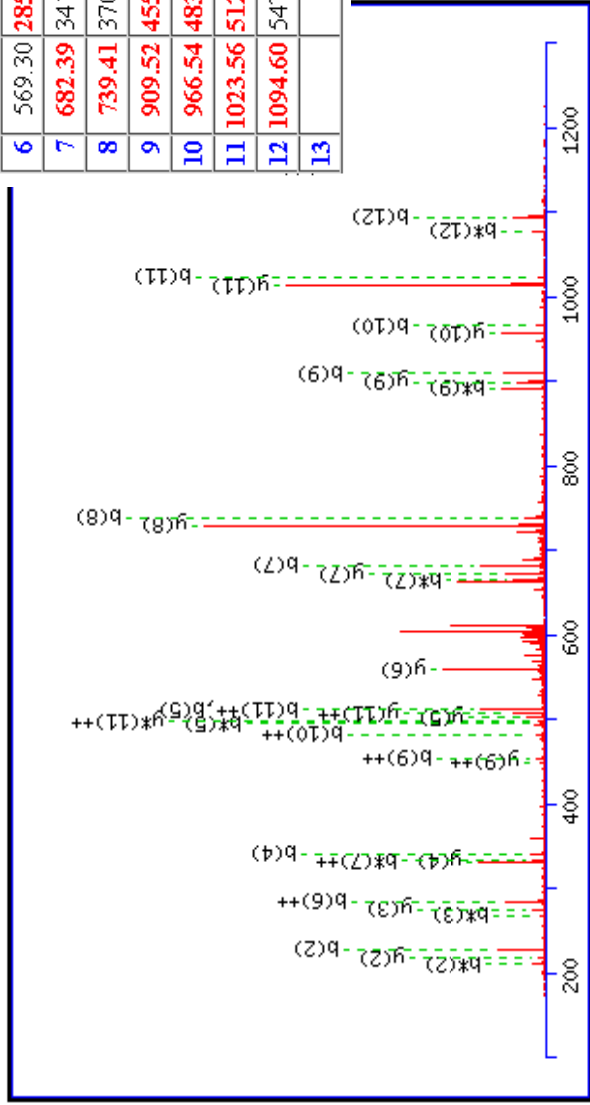

Monoisotopic mass of neutral peptide Mr(calc): 1239.69

Variable modifications:

K2 : Acetyl (K)

K5 : Acetyl (K)

K9 : Acetyl (K)

Ions Score: 52 Expect: 0.0018

Matches (**Bold Red**): 34/94 fragment ions using 97 most intense peaks

| #  | b              | b <sup>++</sup> | b <sup>*</sup> | b <sup>+++</sup> | Seq. | y              | y <sup>++</sup> | y <sup>*</sup> | y <sup>+++</sup> | #  |
|----|----------------|-----------------|----------------|------------------|------|----------------|-----------------|----------------|------------------|----|
| 1  | 58.03          | 29.52           |                |                  | G    |                |                 |                |                  | 13 |
| 2  | <b>228.13</b>  | 114.57          | <b>211.11</b>  | 106.06           | K    | 1183.68        | 592.34          | 1166.65        | 583.83           | 12 |
| 3  | <b>285.16</b>  | 143.08          | <b>268.13</b>  | 134.57           | G    | <b>1013.57</b> | <b>507.29</b>   | 996.55         | <b>498.78</b>    | 11 |
| 4  | <b>342.18</b>  | 171.59          | 325.15         | 163.08           | G    | <b>956.55</b>  | 478.78          | 939.53         | 470.27           | 10 |
| 5  | <b>512.28</b>  | 256.65          | <b>495.26</b>  | 248.13           | K    | <b>899.53</b>  | <b>450.27</b>   | 882.50         | 441.76           | 9  |
| 6  | 569.30         | <b>285.16</b>   | 552.28         | 276.64           | G    | <b>729.43</b>  | 365.22          | 712.40         | 356.70           | 8  |
| 7  | <b>682.39</b>  | 341.70          | <b>665.36</b>  | <b>333.18</b>    | L    | <b>672.40</b>  | 336.71          | 655.38         | 328.19           | 7  |
| 8  | <b>739.41</b>  | 370.21          | 722.38         | 361.70           | G    | <b>559.32</b>  | 280.16          | 542.29         | 271.65           | 6  |
| 9  | <b>909.52</b>  | <b>455.26</b>   | <b>892.49</b>  | 446.75           | K    | <b>502.30</b>  | 251.65          | 485.27         | 243.14           | 5  |
| 10 | <b>966.54</b>  | <b>483.77</b>   | 949.51         | 475.26           | G    | <b>332.19</b>  | 166.60          | 315.17         | 158.09           | 4  |
| 11 | <b>1023.56</b> | <b>512.28</b>   | 1006.53        | 503.77           | G    | <b>275.17</b>  | 138.09          | 258.14         | 129.58           | 3  |
| 12 | <b>1094.60</b> | 547.80          | <b>1077.57</b> | 539.29           | A    | <b>218.15</b>  | 109.58          | 201.12         | 101.07           | 2  |
| 13 |                |                 |                |                  | K    | 147.11         | 74.06           | 130.09         | 65.55            | 1  |

# GK<sub>ac</sub>GGK<sub>ac</sub>GLGK<sub>ac</sub>GGAK<sub>ac</sub>R

## H4K5, K8, K12, K16

MS/MS Fragmentation of **GKGGKGLGKGGAKR**  
Found in **gi|28173560**, histone H4 [Homo sapiens]

Match to Query 27205: 1437.803384 from(719.908968,2+)  
From data file HelaHistoneH4\_CrotonylIP.dta

Click mouse within plot area to zoom in by factor of two about that point  
Or, Plot from  to  Da

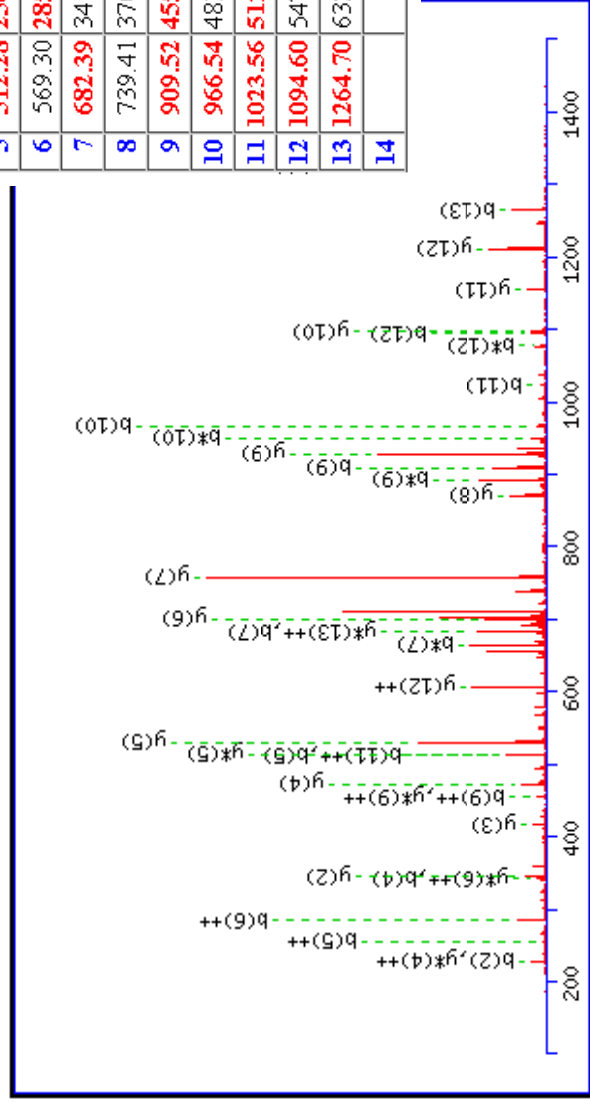

Monoisotopic mass of neutral peptide Mr(calc): 1437.81

Variable modifications:

- K2 : Acetyl1 (K)
- K5 : Acetyl1 (K)
- K9 : Acetyl1 (K)
- K13 : Acetyl1 (K)

Ions Score: 63 Expect: 0.00017

Matches (**Bold Red**): 35/102 fragment ions using 72 most intense peaks

| #  | b              | b <sup>++</sup> | b <sup>*</sup> | b <sup>+++</sup> | Seq. | y              | y <sup>++</sup> | y <sup>*</sup> | y <sup>+++</sup> | #  |
|----|----------------|-----------------|----------------|------------------|------|----------------|-----------------|----------------|------------------|----|
| 1  | 58.03          | 29.52           |                |                  | G    |                |                 |                |                  | 14 |
| 2  | <b>228.13</b>  | 114.57          | 211.11         | 106.06           | K    | 1381.79        | 691.40          | 1364.76        | <b>682.89</b>    | 13 |
| 3  | <b>285.16</b>  | 143.08          | 268.13         | 134.57           | G    | <b>1211.69</b> | <b>606.35</b>   | 1194.66        | 597.83           | 12 |
| 4  | <b>342.18</b>  | 171.59          | 325.15         | 163.08           | G    | <b>1154.66</b> | 577.84          | 1137.64        | 569.32           | 11 |
| 5  | <b>512.28</b>  | <b>256.65</b>   | 495.26         | 248.13           | K    | <b>1097.64</b> | 549.32          | 1080.62        | 540.81           | 10 |
| 6  | 569.30         | <b>285.16</b>   | 552.28         | 276.64           | G    | <b>927.54</b>  | 464.27          | 910.51         | <b>455.76</b>    | 9  |
| 7  | <b>682.39</b>  | 341.70          | <b>665.36</b>  | 333.18           | L    | <b>870.52</b>  | 435.76          | 853.49         | 427.25           | 8  |
| 8  | 739.41         | 370.21          | 722.38         | 361.70           | G    | <b>757.43</b>  | 379.22          | 740.40         | 370.71           | 7  |
| 9  | <b>909.52</b>  | <b>455.26</b>   | <b>892.49</b>  | 446.75           | K    | <b>700.41</b>  | 350.71          | 683.38         | <b>342.20</b>    | 6  |
| 10 | <b>966.54</b>  | 483.77          | <b>949.51</b>  | 475.26           | G    | <b>530.30</b>  | 265.66          | <b>513.28</b>  | 257.14           | 5  |
| 11 | <b>1023.56</b> | <b>512.28</b>   | 1006.53        | 503.77           | G    | <b>473.28</b>  | 237.15          | 456.26         | <b>228.63</b>    | 4  |
| 12 | <b>1094.60</b> | 547.80          | <b>1077.57</b> | 539.29           | A    | <b>416.26</b>  | 208.63          | 399.24         | 200.12           | 3  |
| 13 | <b>1264.70</b> | 632.85          | 1247.67        | 624.34           | K    | <b>345.22</b>  | 173.12          | 328.20         | 164.60           | 2  |
| 14 |                |                 |                |                  | R    | 175.12         | 88.06           | 158.09         | 79.55            | 1  |

pr-GK<sub>ac</sub>GGK<sub>ac</sub>GLGK<sub>ac</sub>GGAK<sub>ac</sub>R

MS/MS Fragmentation of GKGGKGLGKGGAKR

Found in [gi|28173560](#), histone H4 [Homo sapiens]

Match to Query 28395: 1493.825104 from (747.919828,2+)

From data file HistoneOffgelfr4 5.dta

Click mouse within plot area to zoom in by factor of two about that point

Or, Plot from  to  Da

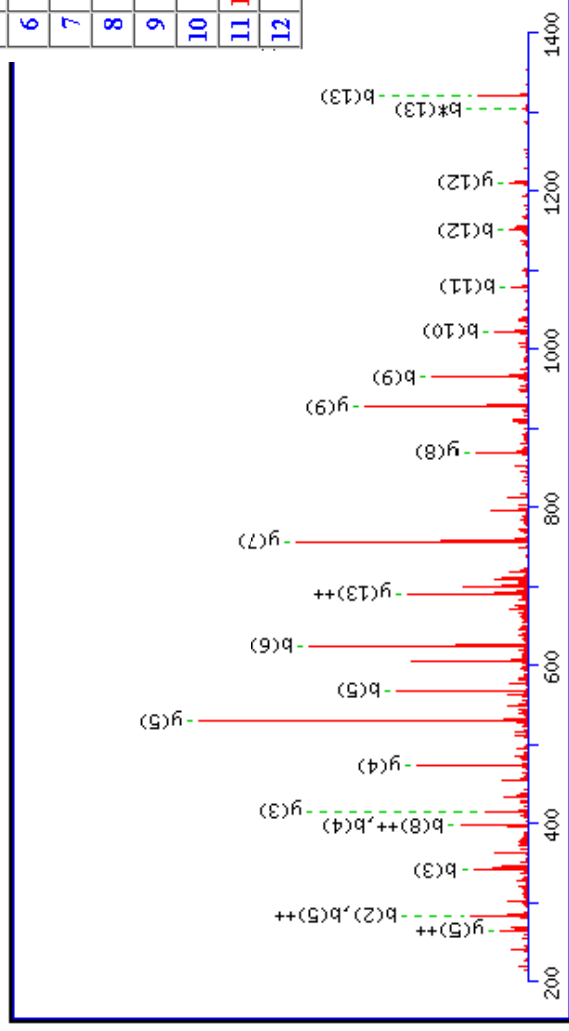

| #  | b       | b <sup>++</sup> | b*      | b <sup>++</sup> | Seq. | y       | y <sup>++</sup> | y*      | y <sup>++</sup> | #  |
|----|---------|-----------------|---------|-----------------|------|---------|-----------------|---------|-----------------|----|
| 1  | 114.05  | 57.53           |         |                 | G    |         |                 |         |                 | 12 |
| 2  | 171.08  | 86.04           |         |                 | G    | 1154.66 | 577.84          | 1137.64 | 569.32          | 11 |
| 3  | 341.18  | 171.09          | 324.16  | 162.58          | K    | 1097.64 | 549.32          | 1080.62 | 540.81          | 10 |
| 4  | 398.20  | 199.61          | 381.18  | 191.09          | G    | 927.54  | 464.27          | 910.51  | 455.76          | 9  |
| 5  | 511.29  | 256.15          | 494.26  | 247.63          | L    | 870.52  | 435.76          | 853.49  | 427.25          | 8  |
| 6  | 568.31  | 284.66          | 551.28  | 276.14          | G    | 757.43  | 379.22          | 740.40  | 370.71          | 7  |
| 7  | 738.41  | 369.71          | 721.39  | 361.20          | K    | 700.41  | 350.71          | 683.38  | 342.20          | 6  |
| 8  | 795.44  | 398.22          | 778.41  | 389.71          | G    | 530.30  | 265.66          | 513.28  | 257.14          | 5  |
| 9  | 852.46  | 426.73          | 835.43  | 418.22          | G    | 473.28  | 237.15          | 456.26  | 228.63          | 4  |
| 10 | 923.49  | 462.25          | 906.47  | 453.74          | A    | 416.26  | 208.63          | 399.24  | 200.12          | 3  |
| 11 | 1093.60 | 547.30          | 1076.57 | 538.79          | K    | 345.22  | 173.12          | 328.20  | 164.60          | 2  |
| 12 |         |                 |         |                 | R    | 175.12  | 88.06           | 158.09  | 79.55           | 1  |

**Monoisotopic mass of neutral peptide Mr(calc): 1493.83**

**Fixed modifications:** Propionyl (N-term)

**Variable modifications:**

K2 : Acetyl (K)

K5 : Acetyl (K)

K9 : acetvl (K)

K13 : Acetyl (K)

|      |           |                  |
|------|-----------|------------------|
| Ions | Score: 94 | Expect: 5.1e-008 |
|------|-----------|------------------|

Matches (**Bold Red**): 22/102 fragment ions using 28 most intense peaks

GK<sub>ac</sub>GGK<sub>ac</sub>GLGK<sub>ac</sub>GGAK<sub>ac</sub>R

H4K5, K8, K12, K16

MS/MS Fragmentation of **GKGGKGLGKGGAKR**  
Found in **gi|28173560**, histone H4 [Homo sapiens]

Match to Query 21430: 1437.799844 from(719.907198.2+)  
From data file histoneoffgeloprFr11\_12.dta

Click mouse within plot area to zoom in by factor of two about that point  
Or, Plot from  to  Da

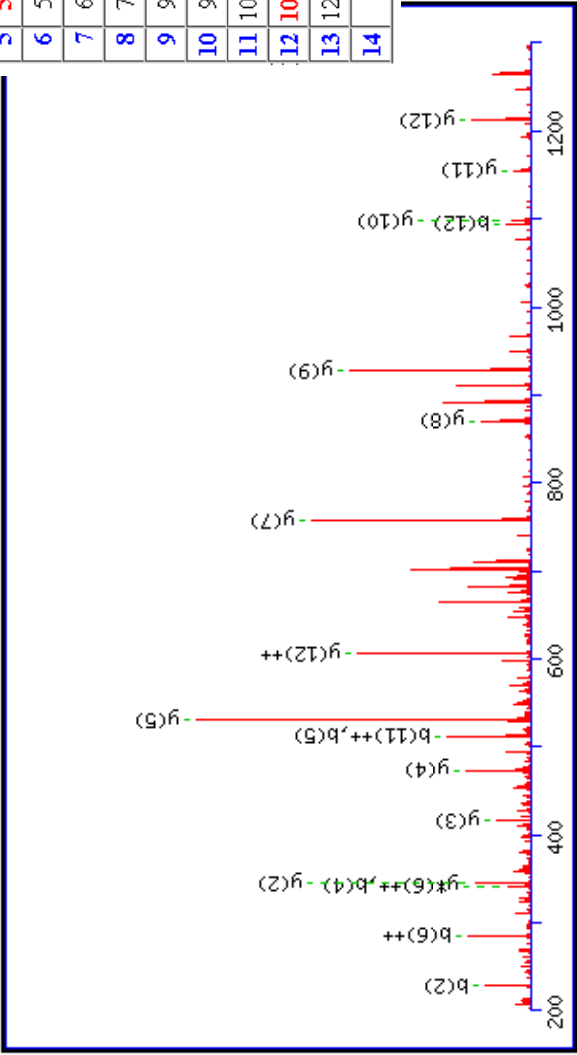

Monoisotopic mass of neutral peptide Mr(calc): 1437.81

Variable modifications:

- K2 : Acetyl1 (K)
- K5 : Acetyl1 (K)
- K9 : Acetyl1 (K)
- K13 : Acetyl1 (K)

Ions Score: 82 Expect: 1.3e-006

Matches (**Bold Red**): 19/102 fragment ions using 25 most intense peaks

| #  | b       | b <sup>++</sup> | b <sup>+</sup> | b <sup>+++</sup> | Seq. | y       | y <sup>++</sup> | y <sup>+</sup> | y <sup>+++</sup> | #  |
|----|---------|-----------------|----------------|------------------|------|---------|-----------------|----------------|------------------|----|
| 1  | 58.03   | 29.52           |                |                  | G    |         |                 |                |                  | 14 |
| 2  | 228.13  | 114.57          | 211.11         | 106.06           | K    | 1381.79 | 691.40          | 1364.76        | 682.89           | 13 |
| 3  | 285.16  | 143.08          | 268.13         | 134.57           | G    | 1211.69 | 606.35          | 1194.66        | 597.83           | 12 |
| 4  | 342.18  | 171.59          | 325.15         | 163.08           | G    | 1154.66 | 577.84          | 1137.64        | 569.32           | 11 |
| 5  | 512.28  | 256.65          | 495.26         | 248.13           | K    | 1097.64 | 549.32          | 1080.62        | 540.81           | 10 |
| 6  | 569.30  | 285.16          | 552.28         | 276.64           | G    | 927.54  | 464.27          | 910.51         | 455.76           | 9  |
| 7  | 682.39  | 341.70          | 665.36         | 333.18           | L    | 870.52  | 435.76          | 853.49         | 427.25           | 8  |
| 8  | 739.41  | 370.21          | 722.38         | 361.70           | G    | 757.43  | 379.22          | 740.40         | 370.71           | 7  |
| 9  | 909.52  | 455.26          | 892.49         | 446.75           | K    | 700.41  | 350.71          | 683.38         | 342.20           | 6  |
| 10 | 966.54  | 483.77          | 949.51         | 475.26           | G    | 530.30  | 265.66          | 513.28         | 257.14           | 5  |
| 11 | 1023.56 | 512.28          | 1006.53        | 503.77           | G    | 473.28  | 237.15          | 456.26         | 228.63           | 4  |
| 12 | 1094.60 | 547.80          | 1077.57        | 539.29           | A    | 416.26  | 208.63          | 399.24         | 200.12           | 3  |
| 13 | 1264.70 | 632.85          | 1247.67        | 624.34           | K    | 345.22  | 173.12          | 328.20         | 164.60           | 2  |
| 14 |         |                 |                |                  | R    | 175.12  | 88.06           | 158.09         | 79.55            | 1  |

# GGK<sub>ac</sub>GLGK<sub>ac</sub>GGAK<sub>ac</sub>R

## H4K8, K12, K16

MS/MS Fragmentation of **GGKGLGKGAKR**

Found in **gi|28173560**, histone H4 [Homo sapiens]

Match to Query 18357: 1210.676674 from(606.345613,2+)

From data file histoneoffgelnoptFr11\_12.dta

Click mouse within plot area to zoom in by factor of two about that point

Or,   to  Da

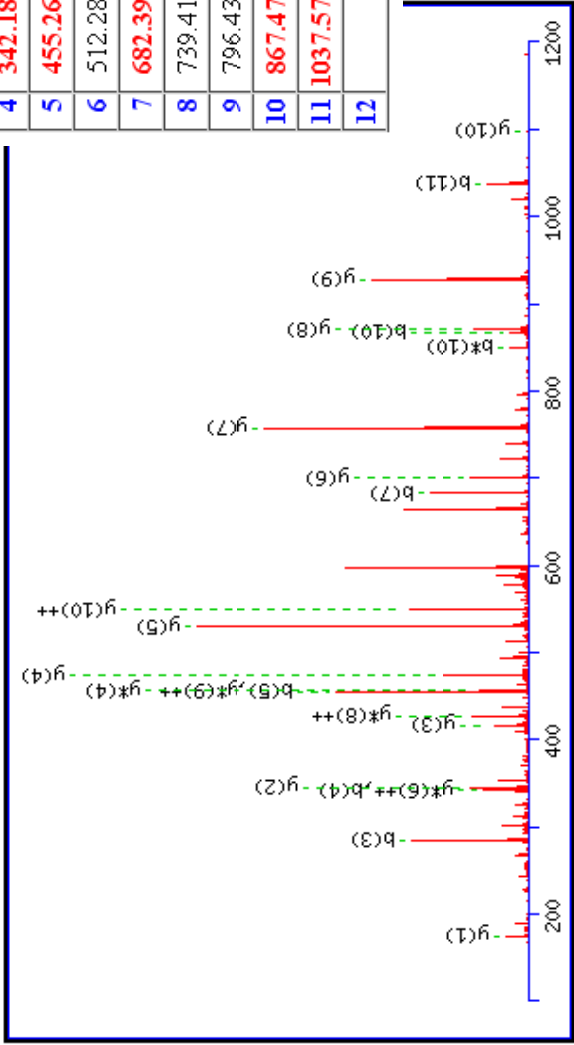

Monoisotopic mass of neutral peptide Mr(calcd): 1210.68

Variable modifications:

K3 : Acetyl (K)

K7 : Acetyl (K)

K11 : Acetyl (K)

Ions Score: 72 Expect: 1.1e-005

Matches (**Bold Red**): 22/84 fragment ions using 43 most intense peaks

| #         | b              | b <sup>++</sup> | b <sup>*</sup> | b <sup>++</sup> | Seq.     | y              | y <sup>++</sup> | y <sup>*</sup> | y <sup>++</sup> | #         |
|-----------|----------------|-----------------|----------------|-----------------|----------|----------------|-----------------|----------------|-----------------|-----------|
| <b>1</b>  | 58.03          | 29.52           |                |                 | <b>G</b> |                |                 |                |                 | <b>12</b> |
| <b>2</b>  | 115.05         | 58.03           |                |                 | <b>G</b> | 1154.66        | 577.84          | 1137.64        | 569.32          | <b>11</b> |
| <b>3</b>  | <b>285.16</b>  | 143.08          | 268.13         | 134.57          | <b>K</b> | <b>1097.64</b> | <b>549.32</b>   | 1080.62        | 540.81          | <b>10</b> |
| <b>4</b>  | <b>342.18</b>  | 171.59          | 325.15         | 163.08          | <b>G</b> | <b>927.54</b>  | 464.27          | 910.51         | <b>455.76</b>   | <b>9</b>  |
| <b>5</b>  | <b>455.26</b>  | 228.13          | 438.23         | 219.62          | <b>L</b> | <b>870.52</b>  | 435.76          | 853.49         | <b>427.25</b>   | <b>8</b>  |
| <b>6</b>  | 512.28         | 256.64          | 495.26         | 248.13          | <b>G</b> | <b>757.43</b>  | 379.22          | 740.40         | 370.71          | <b>7</b>  |
| <b>7</b>  | <b>682.39</b>  | 341.70          | 665.36         | 333.18          | <b>K</b> | <b>700.41</b>  | 350.71          | 683.38         | <b>342.20</b>   | <b>6</b>  |
| <b>8</b>  | 739.41         | 370.21          | 722.38         | 361.70          | <b>G</b> | <b>530.30</b>  | 265.66          | 513.28         | 257.14          | <b>5</b>  |
| <b>9</b>  | 796.43         | 398.72          | 779.40         | 390.21          | <b>G</b> | <b>473.28</b>  | 237.15          | <b>456.26</b>  | 228.63          | <b>4</b>  |
| <b>10</b> | <b>867.47</b>  | 434.24          | <b>850.44</b>  | 425.72          | <b>A</b> | <b>416.26</b>  | 208.63          | 399.24         | 200.12          | <b>3</b>  |
| <b>11</b> | <b>1037.57</b> | 519.29          | 1020.55        | 510.78          | <b>K</b> | <b>345.22</b>  | 173.12          | 328.20         | 164.60          | <b>2</b>  |
| <b>12</b> |                |                 |                |                 | <b>R</b> | <b>175.12</b>  | 88.06           | 158.09         | 79.55           | <b>1</b>  |







GK<sub>pr</sub>GGK<sub>pr</sub>GLGK<sub>ac</sub>GGAK<sub>pr</sub>R

H4K12

R.GKGGKGLGK(14)GGAKR.H (+2) - Mod : 0.09 at 0(-1) - Retention time : 41.15 min - Precursor m/z : 740.93 - Precursor int. : 151248.000 - Basepeak int. : 9908.050

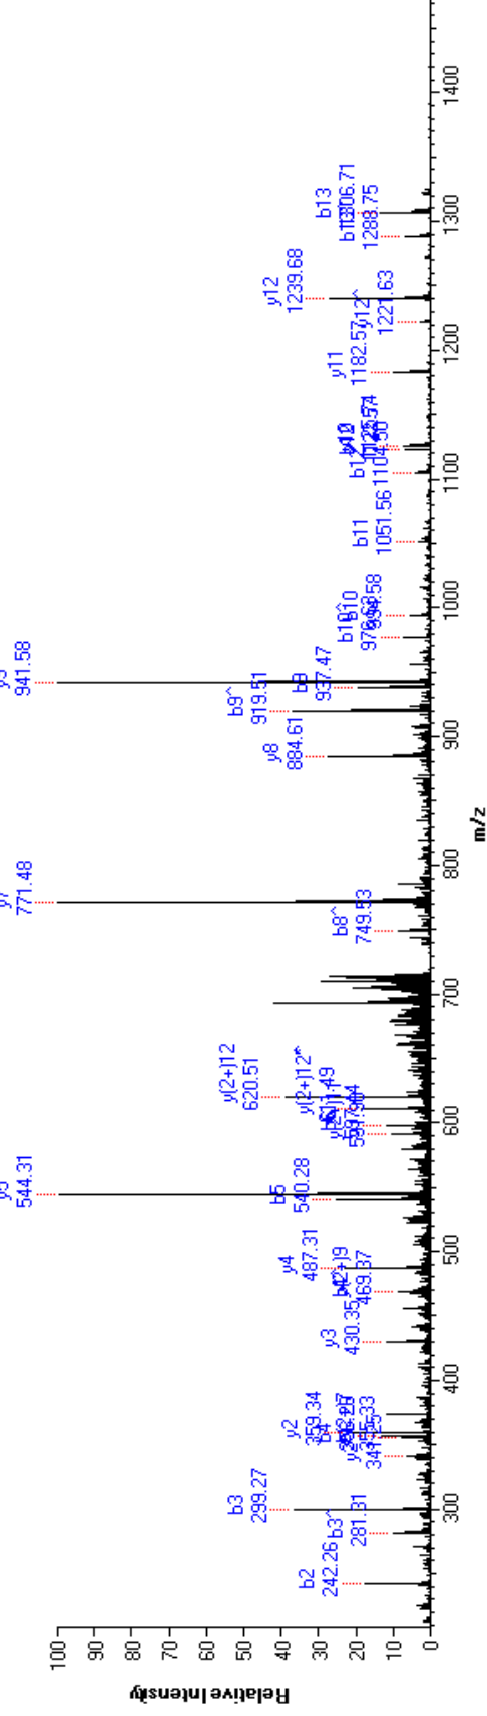

| (b) Seq (y) | b                       | b <sup>+</sup> | b <sup>+</sup>          | y                       | y <sup>+</sup> | y <sup>+</sup>          | b(2+)                  | b(2+) <sup>+</sup> | y(2+)                  | y(2+) <sup>+</sup>     | y(2+) <sup>+</sup>     |
|-------------|-------------------------|----------------|-------------------------|-------------------------|----------------|-------------------------|------------------------|--------------------|------------------------|------------------------|------------------------|
| 1 G 14      | 58.0293                 | 41.0027        | 40.0187                 | 1480.7708               | 1463.7441      | 1462.7601               | 0.0000                 | 0.0000             | 740.8893               | 732.3760               | 731.8840               |
| 2 K 13      | 242.1242 <sup>xx</sup>  | 225.0977       | 224.1137                | 1423.7493               | 1406.7228      | 1405.7386               | 0.0000                 | 0.0000             | 712.3785               | 703.8653               | 703.3733               |
| 3 G 12      | 299.1457 <sup>xx</sup>  | 282.1192       | 281.1351 <sup>xx</sup>  | 1239.6543 <sup>xx</sup> | 1222.6278      | 1221.6438 <sup>xx</sup> | 0.0000                 | 0.0000             | 620.3311 <sup>xx</sup> | 611.8178 <sup>xx</sup> | 611.3258 <sup>xx</sup> |
| 4 G 11      | 356.1672 <sup>xx</sup>  | 339.1406       | 338.1566                | 1182.6328 <sup>xx</sup> | 1165.6063      | 1164.6223               | 0.0000                 | 0.0000             | 591.8203 <sup>xx</sup> | 583.3071               | 582.8151               |
| 5 K 10      | 540.2621 <sup>xx</sup>  | 523.2356       | 522.2516                | 1125.6113 <sup>xx</sup> | 1108.5848      | 1107.6008               | 0.0000                 | 0.0000             | 563.3096               | 554.7963               | 554.3043               |
| 6 G 9       | 597.2836 <sup>xx</sup>  | 580.2570       | 579.2730                | 941.5164 <sup>xx</sup>  | 924.4899       | 923.5059                | 0.0000                 | 0.0000             | 471.2621               | 462.7488               | 462.2568               |
| 7 L 8       | 710.3676                | 693.3411       | 692.3571                | 884.4950 <sup>xx</sup>  | 867.4684       | 866.4844                | 355.6877 <sup>xx</sup> | 347.1745           | 346.6825               | 343.2381               | 343.7461               |
| 8 G 7       | 767.3891                | 750.3625       | 749.3785 <sup>xx</sup>  | 771.4109 <sup>xx</sup>  | 754.3843       | 753.4003                | 384.1985               | 375.6852           | 386.2094               | 377.6961               | 377.2041               |
| 9 K 6       | 937.4841 <sup>xx</sup>  | 920.4575       | 919.4735 <sup>xx</sup>  | 714.3895                | 697.3629       | 696.3789                | 469.2459 <sup>xx</sup> | 460.7327           | 357.6986               | 349.1854               | 348.6934               |
| 10 G 5      | 994.5056 <sup>xx</sup>  | 977.4790       | 976.4950 <sup>xx</sup>  | 544.2945 <sup>xx</sup>  | 527.2679       | 526.2839                | 497.7567               | 489.2434           | 0.0000                 | 0.0000                 | 0.0000                 |
| 11 G 4      | 1051.5270 <sup>xx</sup> | 1034.5005      | 1033.5165               | 487.2730 <sup>xx</sup>  | 470.2465       | 469.2625 <sup>xx</sup>  | 526.2674               | 517.7542           | 0.0000                 | 0.0000                 | 0.0000                 |
| 12 A 3      | 1122.5641 <sup>xx</sup> | 1105.5376      | 1104.5536 <sup>xx</sup> | 430.2516 <sup>xx</sup>  | 413.2250       | 412.2410                | 561.7859               | 553.2727           | 0.0000                 | 0.0000                 | 0.0000                 |
| 13 K 2      | 1306.6591 <sup>xx</sup> | 1289.6326      | 1288.6484 <sup>xx</sup> | 359.2144 <sup>xx</sup>  | 342.1879       | 341.2039 <sup>xx</sup>  | 653.8334               | 645.3202           | 0.0000                 | 0.0000                 | 0.0000                 |
| 14 R 1      | 1462.7601               | 1445.7336      | 1444.7496               | 175.1195                | 158.0930       | 157.1089                | 731.8840               | 723.3707           | 0.0000                 | 0.0000                 | 0.0000                 |

GK<sub>pr</sub>GGK<sub>pr</sub>GLGK<sub>pr</sub>GGAK<sub>ac</sub>R

H4K16

RLGGKGLGKGGAKR.H (+2) - Mod : -14.00 at K(13) - Retention time : 41.69 min - Precursor m/z : 740.94 - Precursor int. : 21229900.000 - Basepeak int. : 1573440.000

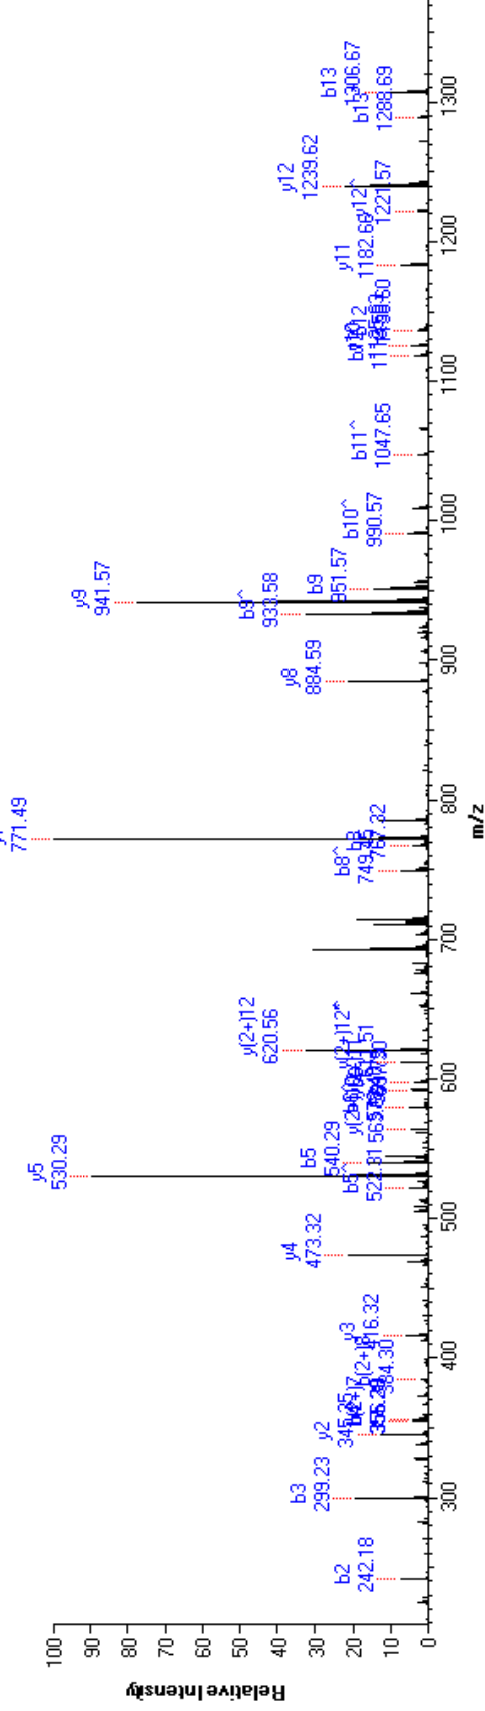

| [b] Seq (y) | b            | b*        | b^           | y            | y*        | y^           | b(2+)       | b(2+)*   | b(2+)^   | y(2+)       | y(2+)*      | y(2+)^      |
|-------------|--------------|-----------|--------------|--------------|-----------|--------------|-------------|----------|----------|-------------|-------------|-------------|
| 1 G 14      | 58.0293      | 41.0027   | 40.0187      | 1480.7708    | 1463.7441 | 1462.7601    | 0.0000      | 0.0000   | 0.0000   | 740.8893    | 732.3760    | 731.8840    |
| 2 K 13      | 242.1242 **  | 225.0977  | 224.1137     | 1423.7493    | 1406.7228 | 1405.7386    | 0.0000      | 0.0000   | 0.0000   | 712.3785    | 703.8653    | 703.3733    |
| 3 G 12      | 299.1457 **  | 282.1192  | 281.1351     | 1239.6543 ** | 1222.6278 | 1221.6438 ** | 0.0000      | 0.0000   | 0.0000   | 620.3311 ** | 611.8178 ** | 611.3258 ** |
| 4 G 11      | 356.1672 **  | 339.1406  | 338.1566     | 1182.6328 ** | 1165.6063 | 1164.6223    | 0.0000      | 0.0000   | 0.0000   | 591.8203 ** | 583.3071    | 582.8151    |
| 5 K 10      | 540.2621 **  | 523.2356  | 522.2516 **  | 1125.6113 ** | 1108.5848 | 1107.6008    | 0.0000      | 0.0000   | 0.0000   | 563.3096 ** | 554.7963    | 554.3043    |
| 6 G 9       | 597.2836 **  | 580.2570  | 579.2730 **  | 941.5164 **  | 924.4899  | 923.5059     | 0.0000      | 0.0000   | 0.0000   | 471.2621    | 462.7488    | 462.2568    |
| 7 L 8       | 710.3676     | 693.3411  | 692.3571     | 884.4950 **  | 867.4684  | 866.4844     | 355.6877 ** | 347.1745 | 346.6825 | 442.7514    | 434.2381    | 433.7461    |
| 8 G 7       | 767.3891 **  | 750.3625  | 749.3785 **  | 771.4109 **  | 754.3843  | 753.4003     | 384.1985 ** | 375.6852 | 375.1932 | 386.2094    | 377.6961    | 377.2041    |
| 9 K 6       | 951.4841 **  | 934.4575  | 933.4735 **  | 714.3895     | 697.3629  | 696.3789     | 476.2459    | 467.7327 | 467.2407 | 357.6986    | 349.1854    | 348.6934    |
| 10 G 5      | 1008.5056    | 991.4790  | 990.4950 **  | 530.2945 **  | 513.2679  | 512.2839     | 504.7567    | 496.2434 | 495.7514 | 0.0000      | 0.0000      | 0.0000      |
| 11 G 4      | 1065.5270    | 1048.5005 | 1047.5165 ** | 473.2730 **  | 456.2465  | 455.2625     | 533.2674    | 524.7542 | 524.2621 | 0.0000      | 0.0000      | 0.0000      |
| 12 A 3      | 1136.5641 ** | 1119.5376 | 1118.5536 ** | 416.2516 **  | 399.2250  | 398.2410     | 568.7959    | 560.2727 | 559.7807 | 0.0000      | 0.0000      | 0.0000      |
| 13 K 2      | 1306.6591 ** | 1289.6326 | 1288.6484 ** | 345.2144 **  | 328.1879  | 327.2039     | 653.8334    | 645.3202 | 644.8282 | 0.0000      | 0.0000      | 0.0000      |
| 14 R 1      | 1462.7601    | 1445.7336 | 1444.7496    | 175.1195     | 158.0930  | 157.1089     | 731.8840    | 723.3707 | 722.8787 | 0.0000      | 0.0000      | 0.0000      |

pr-GLGK<sub>ac</sub>GGAK<sub>ac</sub>R

H4K12, K16

MS/MS Fragmentation of **GLGKGGAKR**

Found in **gi|28173560**, histone H4 [Homo sapiens]

Match to Query 18259: 982.552774 from(492.283663,2+)

From data file HistoneOffelfr8\_9.dta

Click mouse within plot area to zoom in by factor of two about that point

Or, Plot from  to  Da

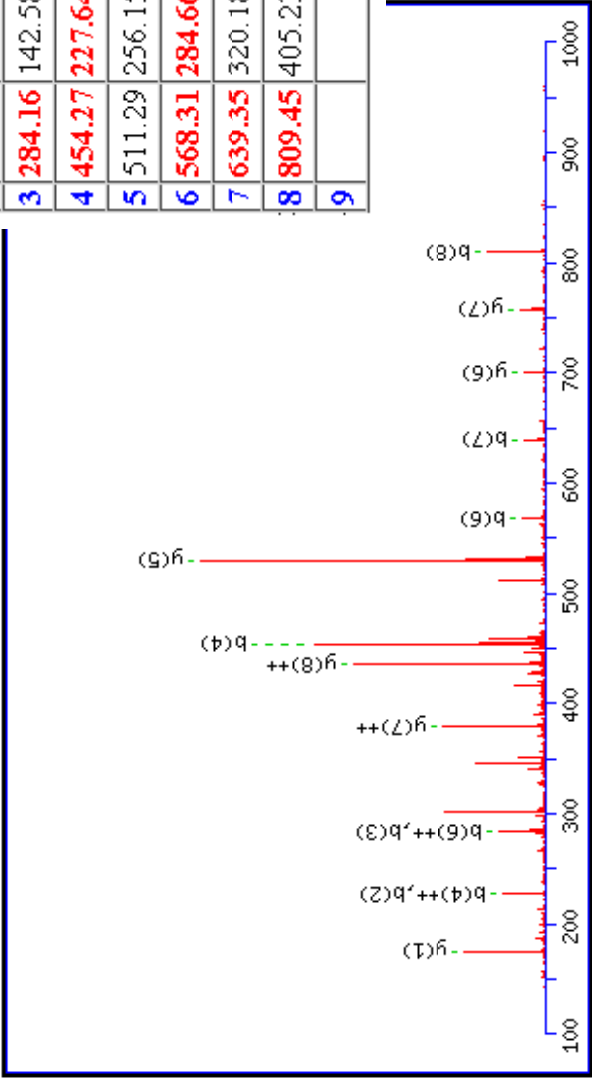

| # | b      | b <sup>++</sup> | b <sup>*</sup> | b <sup>++</sup> | Seq. | y      | y <sup>++</sup> | y <sup>*</sup> | y <sup>++</sup> | # |
|---|--------|-----------------|----------------|-----------------|------|--------|-----------------|----------------|-----------------|---|
| 1 | 114.05 | 57.53           |                |                 | G    |        |                 |                |                 | 9 |
| 2 | 227.14 | 114.07          |                |                 | L    | 870.52 | 435.76          | 853.49         | 427.25          | 8 |
| 3 | 284.16 | 142.58          |                |                 | G    | 757.43 | 379.22          | 740.40         | 370.71          | 7 |
| 4 | 454.27 | 227.64          | 437.24         | 219.12          | K    | 700.41 | 350.71          | 683.38         | 342.20          | 6 |
| 5 | 511.29 | 256.15          | 494.26         | 247.63          | G    | 530.30 | 265.66          | 513.28         | 257.14          | 5 |
| 6 | 568.31 | 284.66          | 551.28         | 276.14          | G    | 473.28 | 237.15          | 456.26         | 228.63          | 4 |
| 7 | 639.35 | 320.18          | 622.32         | 311.66          | A    | 416.26 | 208.63          | 399.24         | 200.12          | 3 |
| 8 | 809.45 | 405.23          | 792.43         | 396.72          | K    | 345.22 | 173.12          | 328.20         | 164.60          | 2 |
| 9 |        |                 |                |                 | R    | 175.12 | 88.06           | 158.09         | 79.55           | 1 |

Monoisotopic mass of neutral peptide Mr(calc): 982.56

Fixed modifications: Propionyl (N-term)

Variable modifications:

K4 : Acetyl (K)

K8 : Acetyl (K)

Ions Score: 47 Expect: 0.0014

Matches (**Bold Red**): 14/58 fragment ions using 21 most intense peaks

pr-GLGK<sub>ac</sub>GGAK<sub>pm</sub> H4K12, K16

K.GLGKGGAK(+70).R (+1) - Mod : 42.00 at K(4) - Retention time : 53.26 min - Precursor m/z : 855.49 - Precursor int. : 142230.000 - Basepeak int. : 35056.000

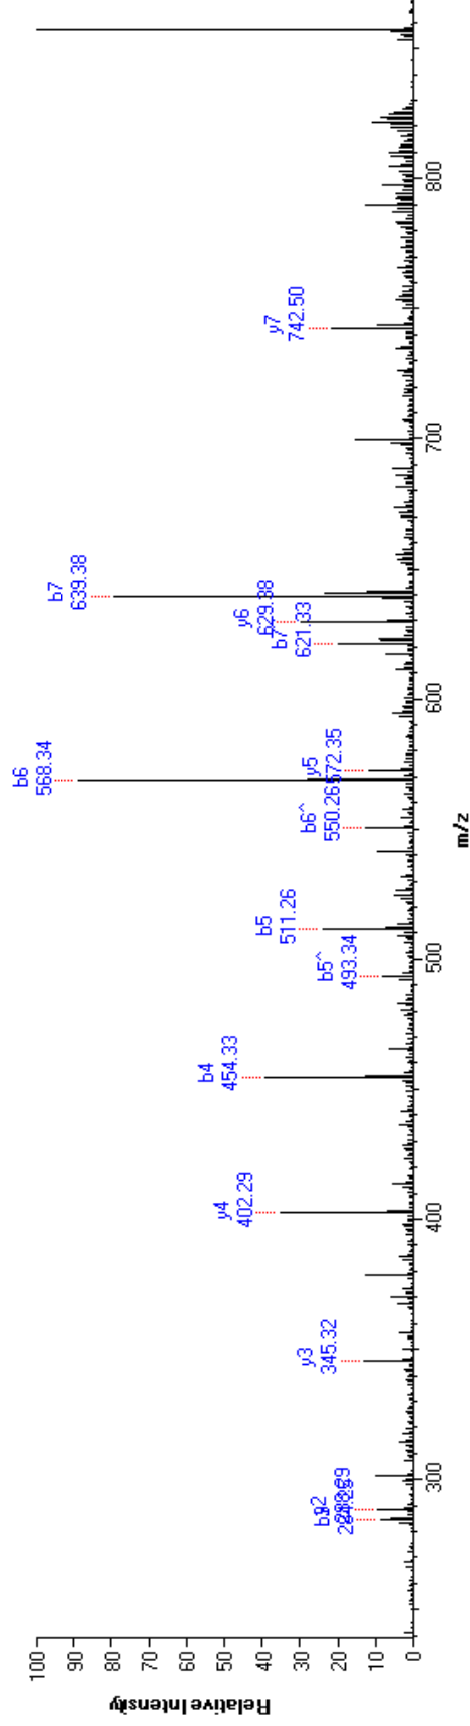

| [b] Seq (y) | b           | b <sup>*</sup> | b <sup>^</sup> | y           | y <sup>*</sup> | y <sup>^</sup> |
|-------------|-------------|----------------|----------------|-------------|----------------|----------------|
| 1 G 8       | 114.0293    | 97.0027        | 96.0187        | 799.4153    | 782.3888       | 781.4047       |
| 2 L 7       | 227.1133    | 210.0868       | 209.1028       | 742.3939 ** | 725.3673       | 724.3833       |
| 3 G 6       | 284.1348 ** | 267.1083       | 266.1242       | 629.3098 ** | 612.2833       | 611.2993       |
| 4 K 5       | 454.2298 ** | 437.2032       | 436.2192       | 572.2883 ** | 555.2618       | 554.2778       |
| 5 G 4       | 511.2512 ** | 494.2247       | 493.2407 **    | 402.1934 ** | 385.1668       | 384.1828       |
| 6 G 3       | 568.2727 ** | 551.2452       | 550.2621 **    | 345.1719 ** | 328.1454       | 327.1613       |
| 7 A 2       | 639.3098 ** | 622.2833       | 621.2993 **    | 288.1505 ** | 271.1239       | 270.1399       |
| 8 K 1       | 837.4047    | 820.3782       | 819.3942       | 217.1133    | 200.0868       | 199.1028       |

pr-K<sub>pm</sub>VLR

H4K20

R.K(+70)VLR.D (+1) - Mod : 0.07 at 0(-1)<sub>1</sub> Retention time : 56.00 min - Precursor m/z : 641.43 - Precursor int. : 48068000.000 - Basepeak int. : 349395.000

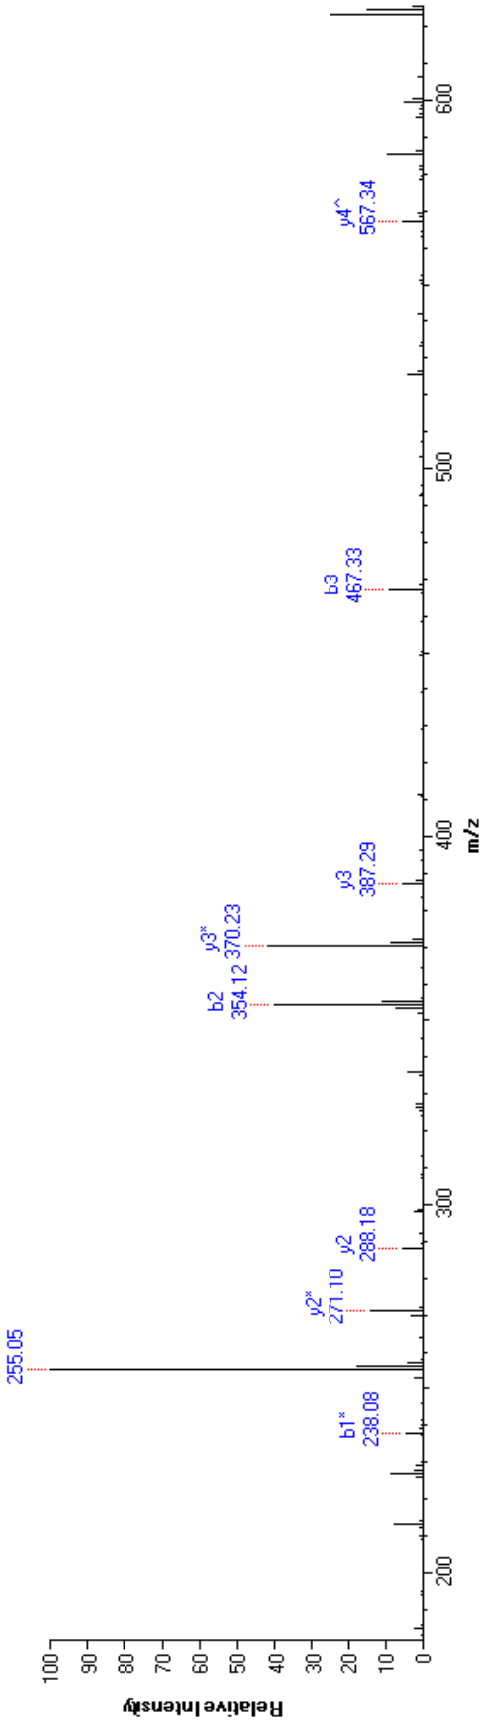

| (b) Seq (y) |     | b                       | b <sup>*</sup>          | b <sup>^</sup> | y                       | y <sup>*</sup>          | y <sup>^</sup>          |
|-------------|-----|-------------------------|-------------------------|----------------|-------------------------|-------------------------|-------------------------|
| 1           | K 4 | 255.1028 <sup>***</sup> | 238.0762 <sup>***</sup> | 237.0922       | 585.3669                | 568.3404                | 567.3564 <sup>***</sup> |
| 2           | V 3 | 354.1712 <sup>***</sup> | 337.1447                | 336.1606       | 387.2720 <sup>***</sup> | 370.2454 <sup>***</sup> | 369.2614                |
| 3           | L 2 | 467.2552 <sup>***</sup> | 450.2287                | 449.2447       | 288.2036 <sup>***</sup> | 271.1770 <sup>***</sup> | 270.1930                |
| 4           | R 1 | 623.3564                | 606.3298                | 605.3458       | 175.1195                | 158.0930                | 157.1089                |



DNIQGITK<sub>ro</sub> PAIR

H4K31

R.DNIQGITKPAIR.R (+2) - Mod : 28.00 at K(8) - Retention time : 55.99 min - Precursor m/z : 677.38 - Precursor int. : 93839.300 - Basepeak int. : 27874.400

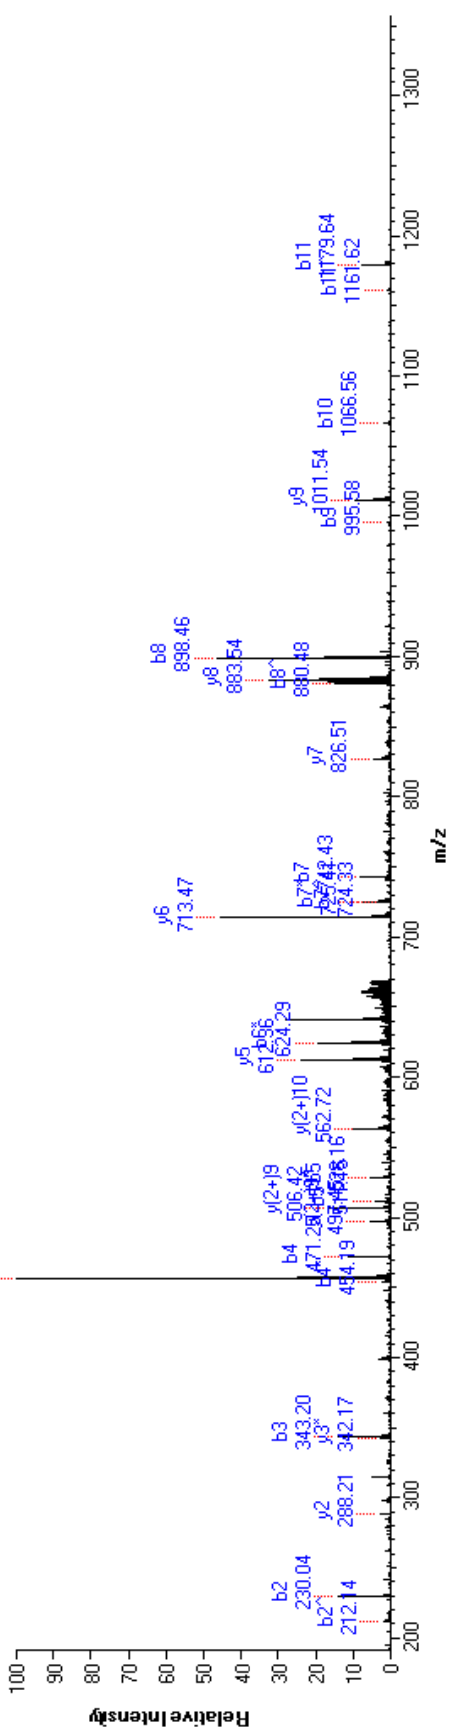

| [b] Seq [y] | b            | b*          | b^           | y            | y*          | y^        | b(2+)    | b(2+)*   | b(2+)^   | y(2+)       | y(2+)*      | y(2+)^      |
|-------------|--------------|-------------|--------------|--------------|-------------|-----------|----------|----------|----------|-------------|-------------|-------------|
| 1 D 12      | 116.0348     | 99.0082     | 98.0242      | 1353.7542    | 1336.7275   | 1335.7435 | 0.0000   | 0.0000   | 0.0000   | 677.3810    | 668.8677    | 668.3757    |
| 2 N 11      | 230.0777 **  | 213.0511    | 212.0671 **  | 1238.7272    | 1221.7006   | 1220.7166 | 0.0000   | 0.0000   | 0.0000   | 619.8675    | 611.3542    | 610.8622    |
| 3 I 10      | 343.1617 **  | 326.1352    | 325.1512     | 1124.6842    | 1107.6577   | 1106.6737 | 0.0000   | 0.0000   | 0.0000   | 562.8460 ** | 554.3328    | 553.8408    |
| 4 Q 9       | 471.2203 **  | 454.1938 ** | 453.2098     | 1011.6002 ** | 994.5736    | 993.5896  | 0.0000   | 0.0000   | 0.0000   | 506.3040 ** | 497.7907 ** | 497.2987 ** |
| 5 G 8       | 528.2418 **  | 511.2152 ** | 510.2312     | 883.5416 **  | 866.5150    | 865.5310  | 0.0000   | 0.0000   | 0.0000   | 442.2747    | 433.7614    | 433.2694    |
| 6 I 7       | 641.3259     | 624.2993 ** | 623.3153     | 826.5201 **  | 809.4936    | 808.5096  | 0.0000   | 0.0000   | 0.0000   | 413.7640    | 405.2507    | 404.7587    |
| 7 T 6       | 742.3735 **  | 725.3470 ** | 724.3630 **  | 713.4360 **  | 696.4095    | 695.4255  | 0.0000   | 0.0000   | 0.0000   | 357.2220    | 348.7087    | 348.2167    |
| 8 K 5       | 898.4685 **  | 881.4420    | 880.4579 **  | 612.3884 **  | 595.3618    | 594.3778  | 449.7382 | 441.2249 | 440.7329 | 0.0000      | 0.0000      | 0.0000      |
| 9 P 4       | 995.5212 **  | 978.4947    | 977.5107     | 456.2934 **  | 439.2669    | 438.2829  | 498.2645 | 489.7513 | 489.2592 | 0.0000      | 0.0000      | 0.0000      |
| 10 A 3      | 1066.5583 ** | 1049.5319   | 1048.5479    | 359.2407     | 342.2141 ** | 341.2301  | 533.7831 | 525.2698 | 524.7778 | 0.0000      | 0.0000      | 0.0000      |
| 11 I 2      | 1179.6425 ** | 1162.6158   | 1161.6318 ** | 288.2036 **  | 271.1770    | 270.1930  | 590.3251 | 581.8118 | 581.3198 | 0.0000      | 0.0000      | 0.0000      |
| 12 R 1      | 1335.7435    | 1318.7170   | 1317.7330    | 175.1195     | 158.0930    | 157.1089  | 668.3757 | 659.8624 | 659.3704 | 0.0000      | 0.0000      | 0.0000      |

# DNIQGITK<sub>ro</sub> PAIR

# H4K31

MS/MS Fragmentation of **DNIQGITKPAIR**

Found in **gi28173560**, histone H4 [Homo sapiens]

Match to Query 24168: 1352.737464 from(677.376008,2+)

From data file HelaHistoneH4\_CrotonylIP.dta

Click mouse within plot area to zoom in by factor of two about that pair

Or, Plot from  to  Da

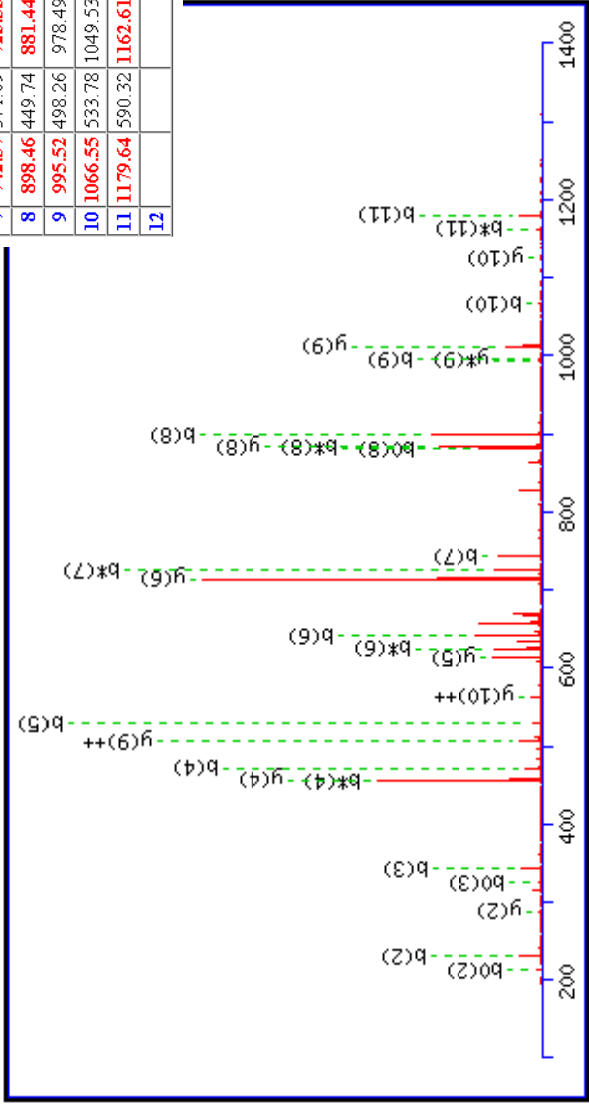

| #  | b              | b <sup>++</sup> | b <sup>*</sup> | b <sup>+++</sup> | b <sup>0</sup> | b <sup>0++</sup> | Seq. | y              | y <sup>++</sup> | y <sup>*</sup> | y <sup>+++</sup> | y <sup>0</sup> | y <sup>0++</sup> | #  |
|----|----------------|-----------------|----------------|------------------|----------------|------------------|------|----------------|-----------------|----------------|------------------|----------------|------------------|----|
| 1  | 116.03         | 58.52           |                |                  | 98.02          | 49.52            | D    |                |                 |                |                  |                |                  | 12 |
| 2  | <b>230.08</b>  | 115.54          | 213.05         | 107.03           | <b>212.07</b>  | 106.54           | N    | 1238.72        | 619.86          | 1221.69        | 611.35           | 1220.71        | 610.86           | 11 |
| 3  | <b>343.16</b>  | 172.08          | 326.13         | 163.57           | <b>325.15</b>  | 163.08           | I    | <b>1124.68</b> | <b>562.84</b>   | 1107.65        | 554.33           | 1106.67        | 553.84           | 10 |
| 4  | <b>471.22</b>  | 236.11          | <b>454.19</b>  | 227.60           | 453.21         | 227.11           | Q    | <b>1011.59</b> | <b>506.30</b>   | <b>994.57</b>  | 497.79           | 993.58         | 497.30           | 9  |
| 5  | <b>528.24</b>  | 264.62          | 511.21         | 256.11           | 510.23         | 255.62           | G    | <b>883.54</b>  | 442.27          | 866.51         | 433.76           | 865.53         | 433.27           | 8  |
| 6  | <b>641.33</b>  | 321.17          | <b>624.30</b>  | 312.65           | 623.31         | 312.16           | I    | 826.51         | 413.76          | 809.49         | 405.25           | 808.50         | 404.76           | 7  |
| 7  | <b>742.37</b>  | 371.69          | <b>725.35</b>  | 363.18           | 724.36         | 362.68           | T    | <b>713.43</b>  | 357.22          | 696.40         | 348.71           | 695.42         | 348.21           | 6  |
| 8  | <b>898.46</b>  | 449.74          | <b>881.44</b>  | 441.22           | <b>880.45</b>  | 440.73           | K    | <b>612.38</b>  | 306.70          | 595.36         | 298.18           |                |                  | 5  |
| 9  | <b>995.52</b>  | 498.26          | 978.49         | 489.75           | 977.51         | 489.26           | P    | <b>456.29</b>  | 228.65          | 439.27         | 220.14           |                |                  | 4  |
| 10 | <b>1066.55</b> | 533.78          | 1049.53        | 525.27           | 1048.54        | 524.77           | A    | 359.24         | 180.12          | 342.21         | 171.61           |                |                  | 3  |
| 11 | <b>1179.64</b> | 590.32          | <b>1162.61</b> | 581.81           | 1161.63        | 581.32           | I    | <b>288.20</b>  | 144.61          | 271.18         | 136.09           |                |                  | 2  |
| 12 |                |                 |                |                  |                |                  | R    | 175.12         | 88.06           | 158.09         | 79.55            |                |                  | 1  |

Monoisotopic mass of neutral peptide Mr(calc): 1352.74

Variable modifications:

K8 : Formyl (K)

Ions Score: 68 Expect: 2.2e-005

Matches (**Bold Red**): 28/120 fragment ions using 48 most intense peaks

# pr-DNIQGITK<sub>pr</sub>PAIR<sub>me</sub> H4K35

R.DNIQGITK(+56)PAIR.R (+2) - Mod : 14.00 at R(12) - Retention time : 59.94 min - Precursor m/z : 726.41 - Precursor int. : 2103550.000 - Basepeak int. : 90714.800

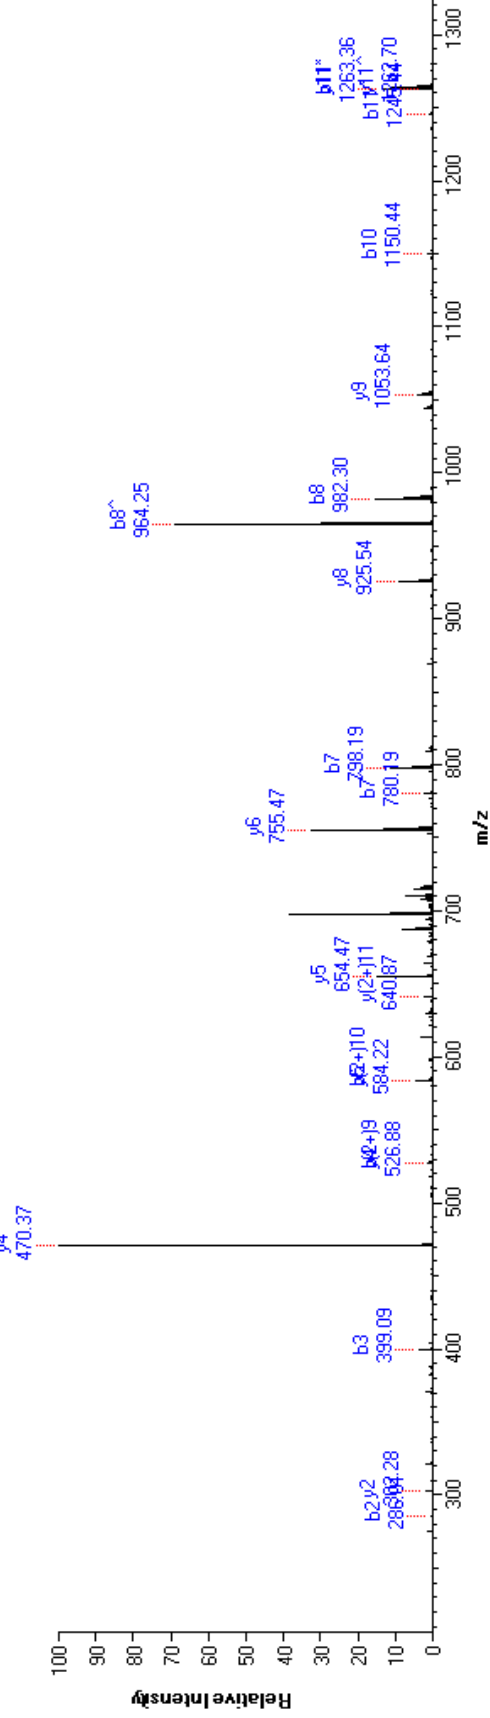

| [b] Seq [y] | b            | b*        | b <sup>+</sup> | y            | y*           | y <sup>+</sup> | b(2+)    | b(2+)*   | y(2+)       | y(2+)*   |
|-------------|--------------|-----------|----------------|--------------|--------------|----------------|----------|----------|-------------|----------|
| 1 D 12      | 172.0348     | 155.0082  | 154.0242       | 1395.7542    | 1378.7275    | 1377.7435      | 0.0000   | 0.0000   | 698.3810    | 689.8677 |
| 2 N 11      | 286.0777 **  | 269.0511  | 268.0671       | 1280.7272    | 1263.7006 ** | 1262.7166 **   | 0.0000   | 0.0000   | 640.8675 ** | 631.8622 |
| 3 I 10      | 399.1617 **  | 382.1352  | 381.1512       | 1166.6842    | 1149.6577    | 1148.6737      | 0.0000   | 0.0000   | 583.8460 ** | 574.8408 |
| 4 Q 9       | 527.2203 **  | 510.1938  | 509.2098       | 1053.6002 ** | 1036.5736    | 1035.5896      | 0.0000   | 0.0000   | 527.3040 ** | 518.2987 |
| 5 G 8       | 584.2418 **  | 567.2153  | 566.2313       | 925.5416 **  | 908.5150     | 907.5310       | 0.0000   | 0.0000   | 463.2747    | 454.2694 |
| 6 I 7       | 697.3259     | 680.2993  | 679.3153       | 868.5201     | 851.4936     | 850.5096       | 0.0000   | 0.0000   | 434.7640    | 425.7587 |
| 7 T 6       | 798.3735 **  | 781.3470  | 780.3630 **    | 755.4360 **  | 738.4095     | 737.4255       | 0.0000   | 0.0000   | 378.2220    | 369.2167 |
| 8 K 5       | 982.4585 **  | 965.4420  | 964.4579 **    | 654.3884 **  | 637.3618     | 636.3778       | 491.7382 | 483.2249 | 327.6981    | 318.6928 |
| 9 P 4       | 1079.5212    | 1062.4948 | 1061.5107      | 470.2934 **  | 453.2669     | 452.2829       | 540.2645 | 531.7513 | 0.0000      | 0.0000   |
| 10 A 3      | 1150.5583 ** | 1133.5319 | 1132.5479      | 373.2407     | 356.2141     | 355.2301       | 575.7831 | 567.2698 | 0.0000      | 0.0000   |
| 11 I 2      | 1263.6425 ** | 1246.6158 | 1245.6318 **   | 302.2036 **  | 285.1770     | 284.1930       | 632.3251 | 623.8118 | 0.0000      | 0.0000   |
| 12 R 1      | 1433.7435    | 1416.7170 | 1415.7330      | 189.1195     | 172.0930     | 171.1089       | 717.3757 | 708.8624 | 0.0000      | 0.0000   |

pr-ISGLIYEETR<sub>me1</sub>

H4Y51

R1ISGLIYEETR.G (+2) - Mod : 14.00 at R(10) - Retention time : 59.94 min - Precursor m/z : 625.83 - Precursor int. : 62846400.000 - Basepeak int. : 15028400.000

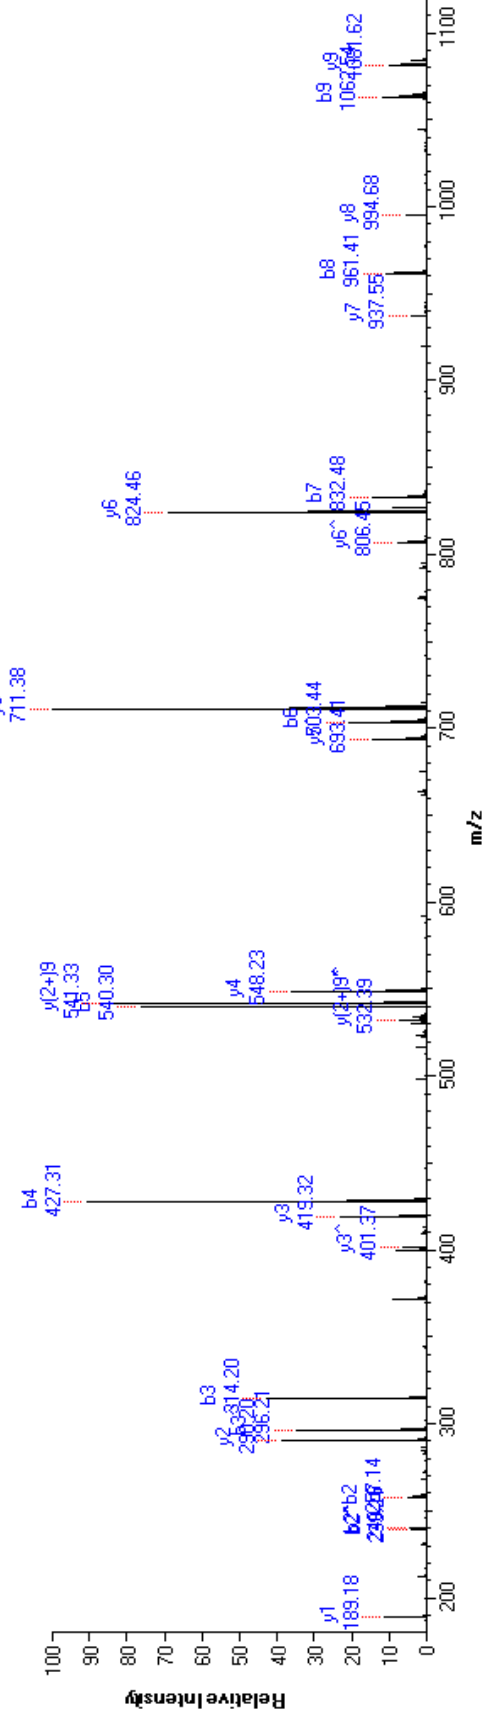

| [b] Seq [y] | b            | b*          | b^          | y            | y*        | y^          | b(2+)    | b(2+)*   | y(2+)       | y(2+)*      | y(2+)^      |
|-------------|--------------|-------------|-------------|--------------|-----------|-------------|----------|----------|-------------|-------------|-------------|
| 1 1 10      | 170.0919     | 153.0653    | 152.0813    | 1194.6213    | 1177.5948 | 1176.6108   | 0.0000   | 0.0000   | 597.8146    | 589.3013    | 588.8093    |
| 2 5 9       | 257.1239 **  | 240.0974 ** | 239.1134 ** | 1081.5374 ** | 1064.5107 | 1063.5267   | 0.0000   | 0.0000   | 541.2726 ** | 532.7593 ** | 532.2673 ** |
| 3 6 8       | 314.1454 **  | 297.1188    | 296.1348 ** | 994.5052 **  | 977.4787  | 976.4947    | 0.0000   | 0.0000   | 497.7565    | 489.2433    | 488.7513    |
| 4 1 7       | 427.2294 **  | 410.2029    | 409.2189    | 937.4838 **  | 920.4573  | 919.4733    | 0.0000   | 0.0000   | 469.2458    | 460.7325    | 460.2405    |
| 5 1 6       | 540.3135 **  | 523.2869    | 522.3029    | 824.3997 **  | 807.3732  | 806.3892 ** | 0.0000   | 0.0000   | 412.7038    | 404.1905    | 403.6985    |
| 6 Y 5       | 703.3768 **  | 686.3503    | 685.3663    | 711.3157 **  | 694.2891  | 693.3051 ** | 0.0000   | 0.0000   | 356.1617    | 347.6485    | 347.1565    |
| 7 E 4       | 832.4194 **  | 815.3929    | 814.4089    | 548.2524 **  | 531.2258  | 530.2418    | 0.0000   | 0.0000   | 0.0000      | 0.0000      | 0.0000      |
| 8 E 3       | 961.4620 **  | 944.4355    | 943.4514    | 419.2098 **  | 402.1832  | 401.1992 ** | 0.0000   | 0.0000   | 0.0000      | 0.0000      | 0.0000      |
| 9 T 2       | 1062.5096 ** | 1045.4832   | 1044.4991   | 290.1672 **  | 273.1406  | 272.1566    | 0.0000   | 0.0000   | 0.0000      | 0.0000      | 0.0000      |
| 10 R 1      | 1232.6108    | 1215.5842   | 1214.6002   | 189.1195 **  | 172.0930  | 171.1089    | 616.8093 | 608.2960 | 607.8040    | 0.0000      | 0.0000      |

ISGLIY<sub>oh</sub>EETR

H4R55

R:ISGLIYEETR.G (+2) - Mod : 16.00 at Y(6) - Retention time : 57.63 min - Precursor m/z : 598.81 - Precursor int. : 29179400.000 - Basepeak int. : 2972820.000

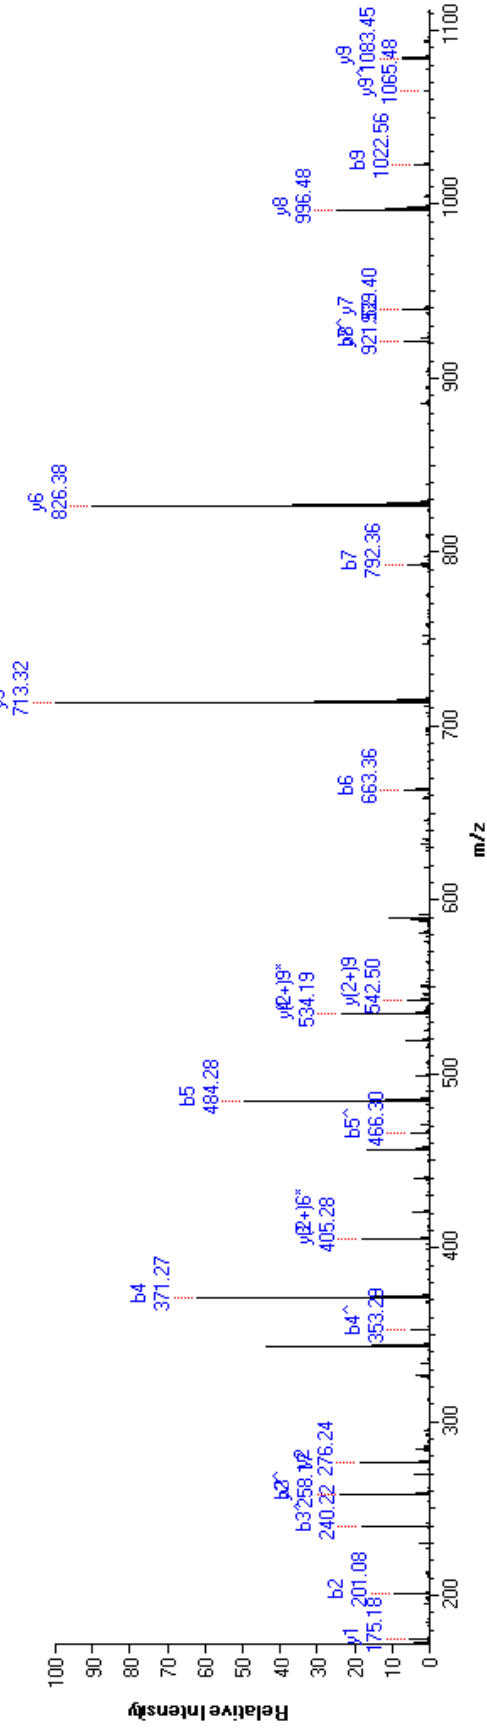

| [b] Seq [y] | b            | b*        | b^          | y            | y*        | y^           | b(2+)    | b(2+)*   | y(2+)       | y(2+)*      | y(2+)^   |
|-------------|--------------|-----------|-------------|--------------|-----------|--------------|----------|----------|-------------|-------------|----------|
| 1 1 10      | 114.0919     | 97.0653   | 96.0813     | 1196.6213    | 1179.5948 | 1178.6108    | 0.0000   | 0.0000   | 598.8146    | 590.3013    | 589.8093 |
| 2 5 9       | 201.1239 **  | 184.0974  | 183.1134    | 1083.5374 ** | 1066.5107 | 1065.5267 ** | 0.0000   | 0.0000   | 542.2726 ** | 533.7593 ** | 533.2673 |
| 3 6 8       | 258.1454 **  | 241.1188  | 240.1348 ** | 996.5052 **  | 979.4787  | 978.4947     | 0.0000   | 0.0000   | 498.7565    | 490.2433    | 489.7513 |
| 4 1 7       | 371.2294 **  | 354.2029  | 353.2189 ** | 939.4838 **  | 922.4573  | 921.4733 **  | 0.0000   | 0.0000   | 470.2458    | 461.7325    | 461.2405 |
| 5 1 6       | 484.3135 **  | 467.2870  | 466.3029 ** | 826.3997 **  | 809.3732  | 808.3892     | 0.0000   | 0.0000   | 413.7038    | 405.1905 ** | 404.6985 |
| 6 Y 5       | 663.3768 **  | 646.3503  | 645.3663    | 713.3157 **  | 696.2891  | 695.3051     | 0.0000   | 0.0000   | 357.1617    | 348.6485    | 348.1565 |
| 7 E 4       | 792.4194 **  | 775.3929  | 774.4089    | 534.2524 **  | 517.2258  | 516.2418     | 0.0000   | 0.0000   | 0.0000      | 0.0000      | 0.0000   |
| 8 E 3       | 921.4520 **  | 904.4355  | 903.4514    | 405.2098 **  | 388.1832  | 387.1992     | 0.0000   | 0.0000   | 0.0000      | 0.0000      | 0.0000   |
| 9 T 2       | 1022.5097 ** | 1005.4832 | 1004.4991   | 276.1672 **  | 259.1406  | 258.1566 **  | 0.0000   | 0.0000   | 0.0000      | 0.0000      | 0.0000   |
| 10 R 1      | 1178.6108    | 1161.5842 | 1160.6002   | 175.1195 **  | 158.0930  | 157.1089     | 589.8093 | 581.2960 | 0.0000      | 0.0000      | 0.0000   |

pr-GVLK<sub>pm</sub>

H4K59

R.GVLKV (+1) - Mod : 70.00 at K(4) - Retention time : 66.46 min - Precursor m/z : 542.35 - Precursor int. : 1338060.000 - Basepeak int. : 38053.100

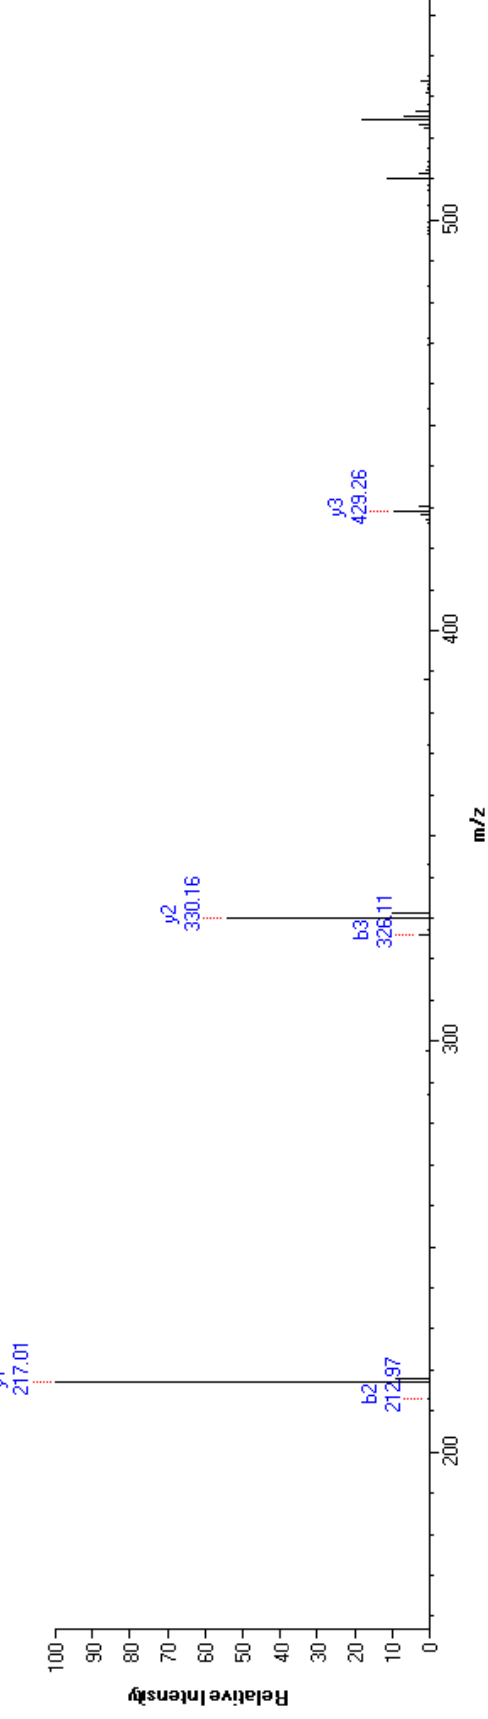

| (b) Seq (y) | b                      | b <sup>*</sup> | b <sup>^</sup> | y                      | y <sup>*</sup> | y <sup>^</sup> |
|-------------|------------------------|----------------|----------------|------------------------|----------------|----------------|
| 1 G 4       | 114.0293               | 97.0027        | 96.0187        | 486.2873               | 469.2607       | 468.2767       |
| 2 V 3       | 213.0977 <sup>xx</sup> | 196.0712       | 195.0871       | 429.2658 <sup>xx</sup> | 412.2393       | 411.2552       |
| 3 L 2       | 326.1818 <sup>xx</sup> | 309.1552       | 308.1712       | 330.1974 <sup>xx</sup> | 313.1709       | 312.1869       |
| 4 K 1       | 524.2767               | 507.2502       | 506.2661       | 217.1133 <sup>xx</sup> | 200.0868       | 199.1028       |

# GVLK<sub>f0</sub>VFLENVIR

# H4K59

MS/MS Fragmentation of **GVLKVFLENVIR**

Found in **gi|28173560**, histone H4 [Homo sapiens]

Match to Query 26399: 1413.835604 from(707.925078,2+)

From data file HelaHistoneH4\_CrotonylIP.dta

Click mouse within plot area to zoom in by factor of two about that poi

Or, Plot from  to  Da

| #  | b              | b <sup>++</sup> | b <sup>*</sup> | b <sup>++</sup> | b <sup>0</sup> | b <sup>++</sup> | b <sup>0</sup> | Seq. | y              | y <sup>++</sup> | y <sup>*</sup> | y <sup>++</sup> | y <sup>0</sup> | y <sup>++</sup> | #  |
|----|----------------|-----------------|----------------|-----------------|----------------|-----------------|----------------|------|----------------|-----------------|----------------|-----------------|----------------|-----------------|----|
| 1  | 58.03          | 29.52           |                |                 |                |                 |                | G    |                |                 |                |                 |                |                 | 12 |
| 2  | 157.10         | 79.05           |                |                 |                |                 |                | V    | 1357.82        | 679.41          | 1340.79        | 670.90          | 1339.81        | 670.41          | 11 |
| 3  | <b>270.18</b>  | 135.59          |                |                 |                |                 |                | L    | <b>1258.75</b> | 629.88          | <b>1241.73</b> | 621.37          | <b>1240.74</b> | 620.87          | 10 |
| 4  | <b>426.27</b>  | 213.64          | 409.24         | 205.13          |                |                 |                | K    | 1145.67        | 573.34          | <b>1128.64</b> | 564.82          | <b>1127.66</b> | 564.33          | 9  |
| 5  | <b>525.34</b>  | 263.17          | 508.31         | 254.66          |                |                 |                | V    | <b>989.58</b>  | 495.29          | 972.55         | 486.78          | 971.57         | 486.29          | 8  |
| 6  | 672.41         | 336.71          | 635.38         | 328.19          |                |                 |                | F    | <b>890.51</b>  | 445.76          | 873.48         | 437.25          | 872.50         | 436.75          | 7  |
| 7  | <b>785.49</b>  | 393.25          | 768.47         | 384.74          |                |                 |                | L    | <b>743.44</b>  | 372.22          | 726.41         | 363.71          | 725.43         | 363.22          | 6  |
| 8  | <b>914.53</b>  | 457.77          | 897.51         | 449.26          | 896.52         | 448.77          |                | E    | <b>630.36</b>  | 315.68          | 613.33         | 307.17          | 612.35         | 306.68          | 5  |
| 9  | <b>1028.58</b> | 514.79          | <b>1011.55</b> | 506.28          | 1010.57        | 505.79          |                | N    | <b>501.31</b>  | 251.16          | 484.29         | 242.65          |                |                 | 4  |
| 10 | <b>1127.65</b> | 564.33          | 1110.62        | 555.81          | 1109.64        | 555.32          |                | V    | <b>387.27</b>  | 194.14          | 370.24         | 185.63          |                |                 | 3  |
| 11 | <b>1240.73</b> | 620.87          | 1223.70        | 612.36          | 1222.72        | 611.86          |                | I    | <b>288.20</b>  | 144.61          | 271.18         | 136.09          |                |                 | 2  |
| 12 |                |                 |                |                 |                |                 |                | R    | 175.12         | 88.06           | 158.09         | 79.55           |                |                 | 1  |

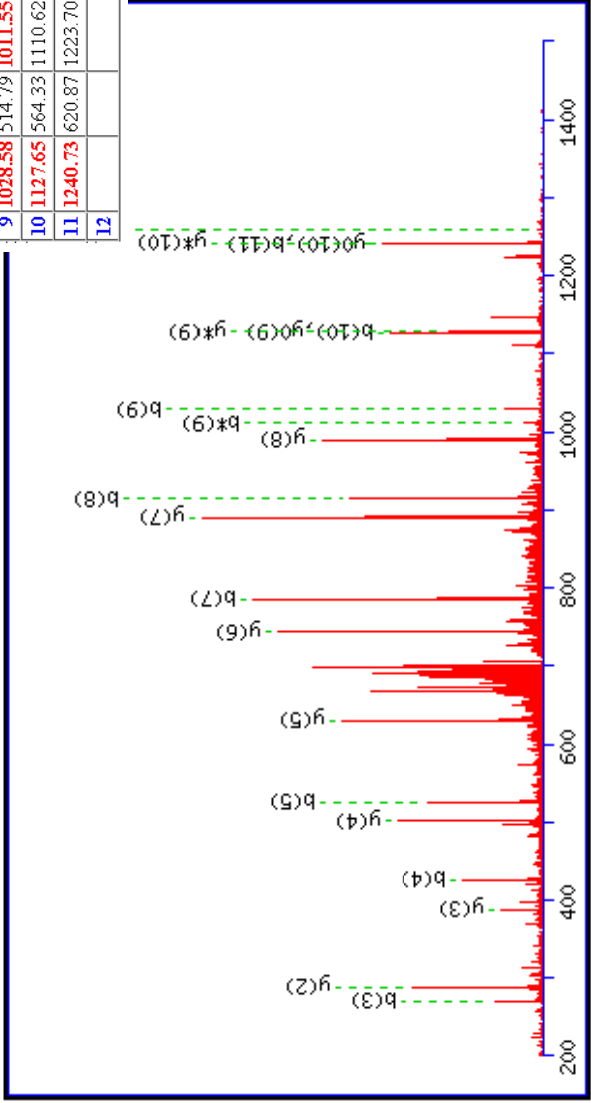

Monoisotopic mass of neutral peptide Mr(calc): 1413.83

Variable modifications:

K4 : Formyl (K)

Ions Score: 64 Expect: 6.7e-005

Matches (**Bold Red**): 21/104 fragment ions using 34 most intense peaks

pr-GVLK<sub>f0</sub>VFLENVIR

H4K59

R.GVLKVFLNVIR.D (+1) - Mod : 28.00 - Retention time : 78.16 min - Precursor m/z : 1470.87 - Precursor int. : 151683.000 - Basepeak int. : 1001.280

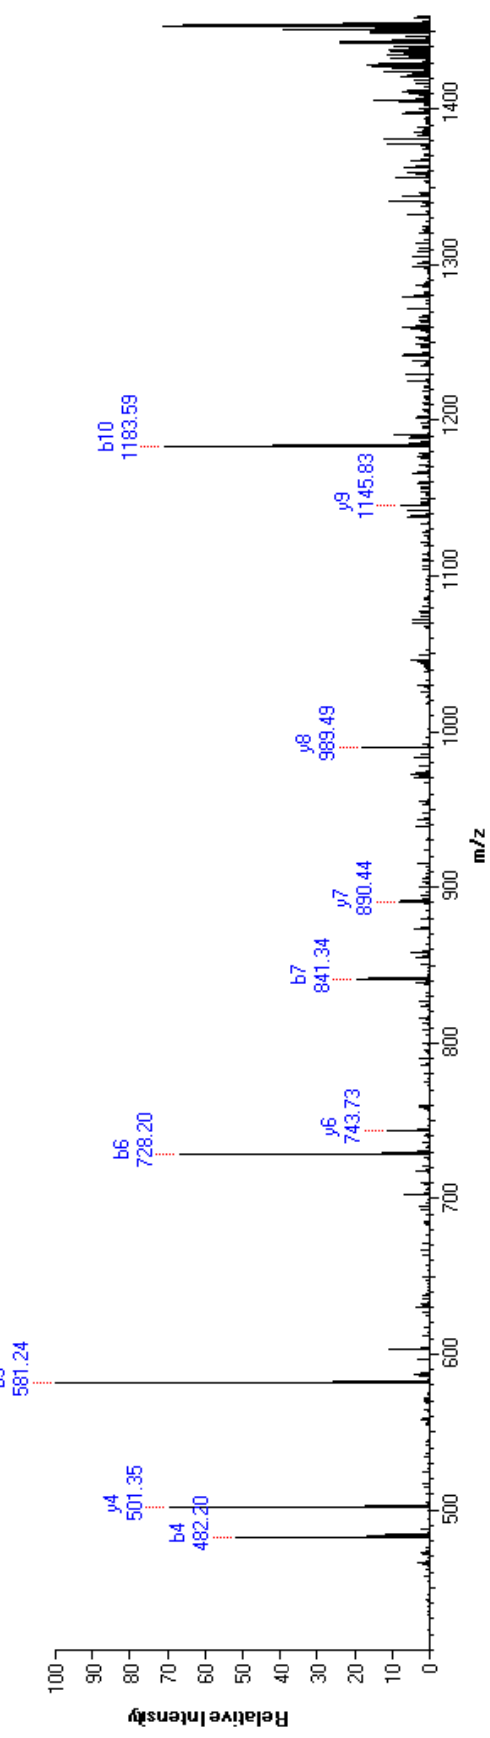

| [b] Seq (y) | b            | b*        | b <sup>+</sup> | y            | y*        | y <sup>+</sup> |
|-------------|--------------|-----------|----------------|--------------|-----------|----------------|
| 1 G 12      | 114.0293     | 97.0027   | 96.0187        | 1414.8473    | 1397.8207 | 1396.8367      |
| 2 V 11      | 213.0977     | 196.0712  | 195.0871       | 1357.8258    | 1340.7992 | 1339.8152      |
| 3 L 10      | 326.1818     | 309.1552  | 308.1712       | 1258.7573    | 1241.7308 | 1240.7468      |
| 4 K 9       | 482.2767 **  | 465.2502  | 464.2661       | 1145.6733 ** | 1128.6467 | 1127.6627      |
| 5 V 8       | 581.3452 **  | 564.3186  | 563.3346       | 989.5784 **  | 972.5518  | 971.5678       |
| 6 F 7       | 728.4135 **  | 711.3870  | 710.4030       | 890.5099 **  | 873.4834  | 872.4994       |
| 7 L 6       | 841.4976 **  | 824.4711  | 823.4871       | 743.4415 **  | 726.4150  | 725.4310       |
| 8 E 5       | 970.5402     | 953.5137  | 952.5296       | 630.3575     | 613.3309  | 612.3469       |
| 9 N 4       | 1084.5831    | 1067.5565 | 1066.5725      | 501.3149 **  | 484.2884  | 483.3043       |
| 10 V 3      | 1183.6515 ** | 1166.6250 | 1165.6410      | 387.2720     | 370.2454  | 369.2614       |
| 11 I 2      | 1296.7356    | 1279.7090 | 1278.7250      | 288.2036     | 271.1770  | 270.1930       |
| 12 R 1      | 1452.8367    | 1435.8102 | 1434.8262      | 175.1195     | 158.0930  | 157.1089       |

pr-VFLENVIR<sub>me1</sub>

H4R67

K.VFLENVIR.D (+2) - Mod : 14.00 at R(8) - Retention time : 82.76 min - Precursor m/z : 530.32 - Precursor int. : 371474.000 - Basepeak int. : 791583.000

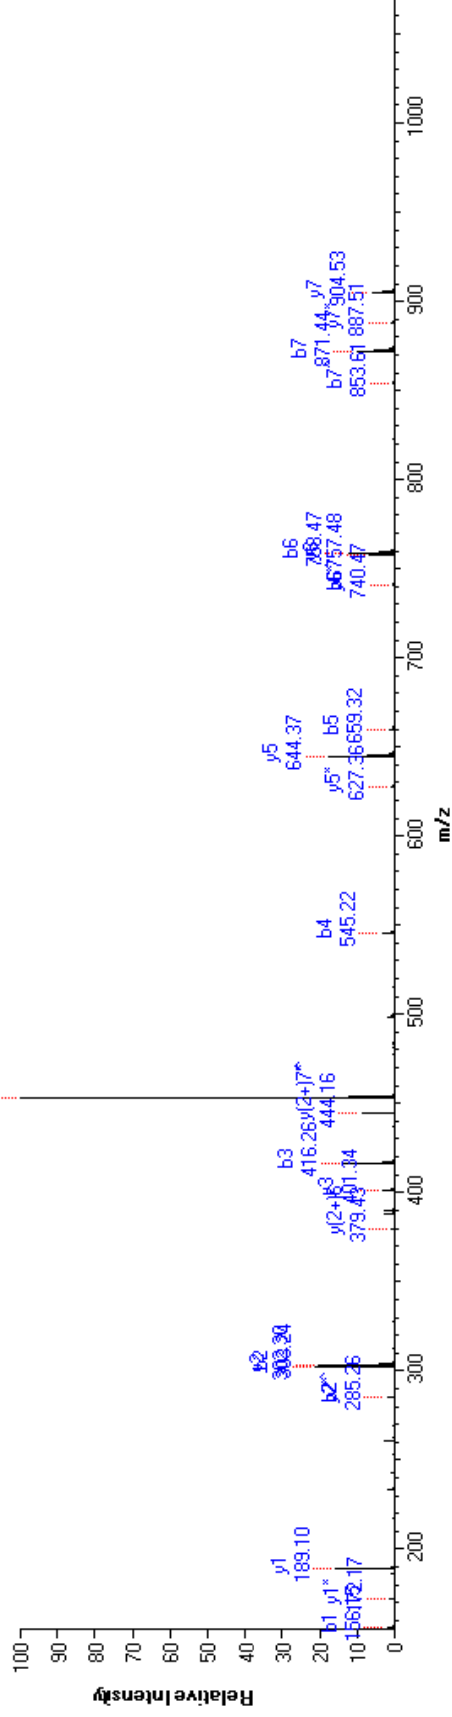

| (b) Seq (y) | b           | b*        | b^          | y           | y*          | y^       | b(2+)    | b(2+)*   | y(2+)       | y(2+)*      | y(2+)^      |
|-------------|-------------|-----------|-------------|-------------|-------------|----------|----------|----------|-------------|-------------|-------------|
| 1 V 8       | 156.0762 ** | 139.0497  | 138.0657    | 1003.5784   | 986.5518    | 985.5678 | 0.0000   | 0.0000   | 502.2931    | 493.7798    | 493.2878    |
| 2 F 7       | 303.1447 ** | 286.1181  | 285.1341 ** | 904.5099 ** | 887.4834 ** | 886.4394 | 0.0000   | 0.0000   | 452.7589 ** | 444.2456 ** | 443.7536 ** |
| 3 L 6       | 416.2287 ** | 399.2022  | 398.2181    | 757.4415 ** | 740.4150 ** | 739.4310 | 0.0000   | 0.0000   | 379.2247 ** | 370.7114    | 370.2194    |
| 4 E 5       | 545.2713 ** | 528.2448  | 527.2607    | 644.3575 ** | 627.3309 ** | 626.3469 | 0.0000   | 0.0000   | 322.6826    | 314.1694    | 313.6774    |
| 5 N 4       | 659.3142 ** | 642.2877  | 641.3036    | 515.3149    | 498.2884    | 497.3043 | 0.0000   | 0.0000   | 0.0000      | 0.0000      | 0.0000      |
| 6 V 3       | 758.3826 ** | 741.3561  | 740.3721 ** | 401.2720 ** | 384.2454    | 383.2614 | 0.0000   | 0.0000   | 0.0000      | 0.0000      | 0.0000      |
| 7 I 2       | 871.4667 ** | 854.4401  | 853.4561 ** | 302.2036 ** | 285.1770 ** | 284.1930 | 0.0000   | 0.0000   | 0.0000      | 0.0000      | 0.0000      |
| 8 R 1       | 1041.5677   | 1024.5413 | 1023.5573   | 189.1195 ** | 172.0930 ** | 171.1089 | 521.2878 | 512.7745 | 0.0000      | 0.0000      | 0.0000      |

pr-DAVTYTEHAK<sub>me1</sub>

H4K77

MS/MS Fragmentation of **DAVTYTEHAK**  
Found in **gi|28173560**, histone H4 [Homo sapiens]  
Match to Query 23784: 1258.616004 from(630.315278,2+)  
From data file HistoneOffgelfr4\_5.dta

Click mouse within plot area to zoom in by factor of two about that poi  
Or, Plot from 150 to 1200 Da

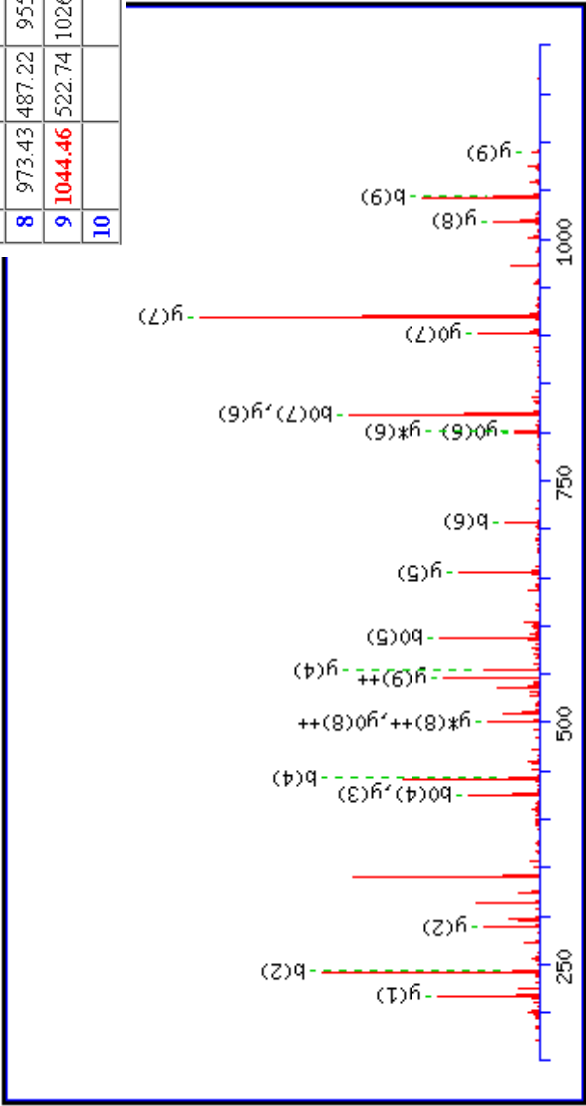

**Monoisotopic mass of neutral peptide Mr(calc): 1259.60**  
**Fixed modifications:** Propionyl (N-term)  
**Variable modifications:**  
K10 : PropionylMethyl (K)  
Ions Score: 61 Expect: 7.1e-005  
Matches (**Red**): 22/84 fragment ions using 35 most intense peaks

| #  | b       | b <sup>++</sup> | b <sup>0</sup> | b <sup>0++</sup> | Seq. | y       | y <sup>++</sup> | y <sup>*</sup> | y <sup>++</sup> | y <sup>0</sup> | y <sup>0++</sup> | #  |
|----|---------|-----------------|----------------|------------------|------|---------|-----------------|----------------|-----------------|----------------|------------------|----|
| 1  | 172.06  | 86.53           | 154.05         | 77.53            | D    |         |                 |                |                 |                |                  | 10 |
| 2  | 243.10  | 122.05          | 225.09         | 113.05           | A    | 1089.56 | 545.28          | 1072.53        | 536.77          | 1071.55        | 536.28           | 9  |
| 3  | 342.17  | 171.59          | 324.16         | 162.58           | V    | 1018.52 | 509.76          | 1001.49        | 501.25          | 1000.51        | 500.76           | 8  |
| 4  | 443.21  | 222.11          | 425.20         | 213.11           | T    | 919.45  | 460.23          | 902.43         | 451.72          | 901.44         | 451.22           | 7  |
| 5  | 606.28  | 303.64          | 588.27         | 294.64           | Y    | 818.40  | 409.71          | 801.38         | 401.19          | 800.39         | 400.70           | 6  |
| 6  | 707.32  | 354.17          | 689.31         | 345.16           | T    | 655.34  | 328.17          | 638.31         | 319.66          | 637.33         | 319.17           | 5  |
| 7  | 836.37  | 418.69          | 818.36         | 409.68           | E    | 554.29  | 277.65          | 537.27         | 269.14          | 536.28         | 268.64           | 4  |
| 8  | 973.43  | 487.22          | 955.42         | 478.21           | H    | 425.25  | 213.13          | 408.22         | 204.62          |                |                  | 3  |
| 9  | 1044.46 | 522.74          | 1026.45        | 513.73           | A    | 288.19  | 144.60          | 271.17         | 136.09          |                |                  | 2  |
| 10 |         |                 |                |                  | K    | 217.15  | 109.08          | 200.13         | 100.57          |                |                  | 1  |

# K<sub>f0</sub>TVTAMDVVYALK

# H4K79

MS/MS Fragmentation of **KTVTAMDVVYALK**

Found in **gi|28173560**, histone H4 [Homo sapiens]

Match to Query 28458: 1465.782754 from(733.898653,2+)

From data file HelaHistoneH4\_CrotonylIP.dta

Click mouse within plot area to zoom in by factor of two about that poi

Or, Plot from  to  Da

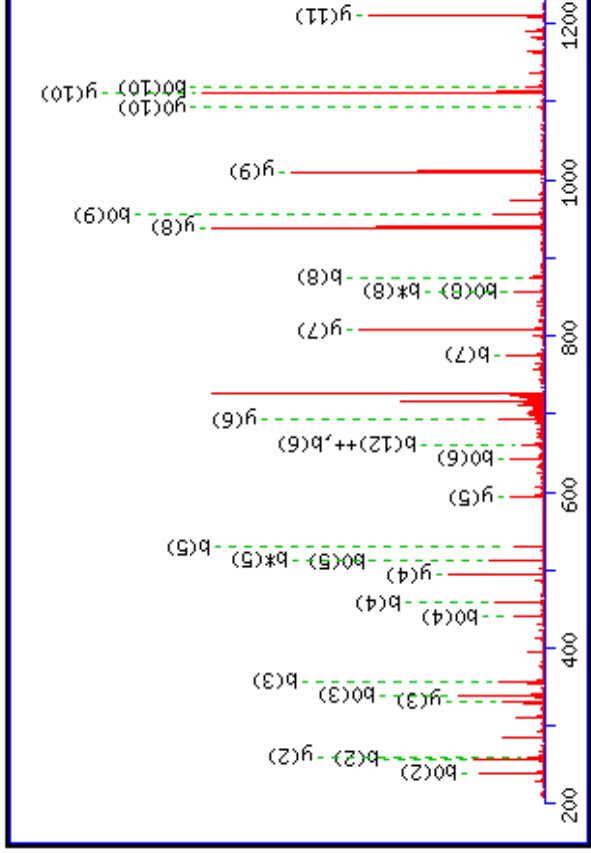

**Monoisotopic mass of neutral peptide Mr(calcd): 1465.79**

**Variable modifications:**

**K1** : Formyl (K)

**Ions Score: 83 Expect: 7.1e-007**

**Matches (Bold Red): 32/130** fragment ions using 60 most intense peaks

| #  | b              | b <sup>++</sup> | b <sup>+</sup> | b <sup>++</sup> | b <sup>0</sup> | b <sup>0++</sup> | Seq. | y              | y <sup>++</sup> | y <sup>+</sup> | y <sup>++</sup> | y <sup>0</sup> | y <sup>0++</sup> | #  |
|----|----------------|-----------------|----------------|-----------------|----------------|------------------|------|----------------|-----------------|----------------|-----------------|----------------|------------------|----|
| 1  | 157.10         | 79.05           | 140.07         | 70.54           |                |                  | K    |                |                 |                |                 |                |                  | 13 |
| 2  | <b>258.14</b>  | 129.58          | 241.12         | 121.06          | <b>240.13</b>  | 120.57           | T    | <b>1310.70</b> | 655.85          | 1293.68        | 647.34          | 1292.69        | 646.85           | 12 |
| 3  | <b>357.21</b>  | 179.11          | 340.19         | 170.60          | <b>339.20</b>  | 170.10           | V    | <b>1209.65</b> | 605.33          | 1192.63        | 596.82          | 1191.64        | 596.33           | 11 |
| 4  | <b>458.26</b>  | 229.63          | 441.23         | 221.12          | <b>440.25</b>  | 220.63           | T    | <b>1110.59</b> | 555.80          | 1093.56        | 547.28          | <b>1092.58</b> | 546.79           | 10 |
| 5  | <b>529.30</b>  | 265.15          | <b>512.27</b>  | 256.64          | <b>511.29</b>  | 256.15           | A    | <b>1009.54</b> | 505.27          | 992.51         | 496.76          | 991.53         | 496.27           | 9  |
| 6  | <b>660.34</b>  | 330.67          | 643.31         | 322.16          | <b>642.33</b>  | 321.67           | M    | <b>938.50</b>  | 469.75          | 921.47         | 461.24          | 920.49         | 460.75           | 8  |
| 7  | <b>775.37</b>  | 388.19          | 758.34         | 379.67          | 757.35         | 379.18           | D    | <b>807.46</b>  | 404.23          | 790.43         | 395.72          | 789.45         | 395.23           | 7  |
| 8  | <b>874.43</b>  | 437.72          | <b>857.41</b>  | 429.21          | <b>856.42</b>  | 428.72           | V    | <b>692.43</b>  | 346.72          | 675.41         | 338.21          |                |                  | 6  |
| 9  | 973.50         | 487.35          | 956.48         | 478.74          | <b>955.49</b>  | 478.25           | V    | <b>593.37</b>  | 397.19          | 576.34         | 388.67          |                |                  | 5  |
| 10 | 1136.57        | 568.79          | 1119.54        | 560.27          | <b>1118.56</b> | 559.78           | Y    | <b>494.30</b>  | 247.65          | 477.27         | 239.14          |                |                  | 4  |
| 11 | 1207.60        | 604.30          | 1190.58        | 595.79          | 1189.59        | 595.30           | A    | <b>331.23</b>  | 166.12          | 314.21         | 157.61          |                |                  | 3  |
| 12 | <b>1320.69</b> | <b>660.85</b>   | 1303.66        | 652.33          | <b>1302.68</b> | 651.84           | L    | <b>260.20</b>  | 130.60          | 243.17         | 122.09          |                |                  | 2  |
| 13 |                |                 |                |                 |                |                  | K    | 147.11         | 74.06           | 130.09         | 65.55           |                |                  | 1  |

TVTAMDVY<sub>oh</sub>ALK

# H4Y88

K.TVTAM(+16)DWYALK.R (+2) · Mod : 16.00 at Y(9) · Retention time : 60.67 min · Precursor m/z : 671.85 · Precursor int. : 222965.000 · Basepeak int. : 62103.200

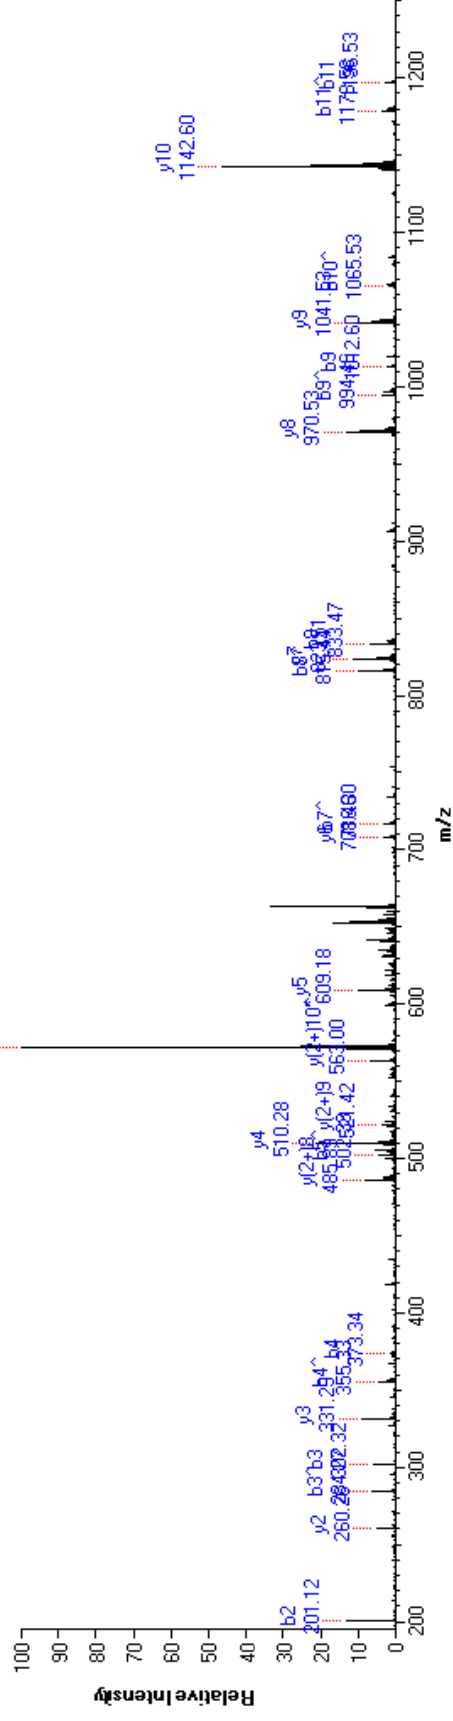

| (b) Seq (y) | b                        | b*        | b <sup>^</sup>           | y                        | y*        | y <sup>^</sup> | b(2+)    | b(2+) <sup>*</sup> | b(2+) <sup>^</sup> | y(2+)                   | y(2+) <sup>*</sup>      | y(2+) <sup>^</sup>      |
|-------------|--------------------------|-----------|--------------------------|--------------------------|-----------|----------------|----------|--------------------|--------------------|-------------------------|-------------------------|-------------------------|
| 1 T 12      | 102.0555                 | 85.0290   | 84.0449                  | 1342.7030                | 1325.6764 | 1324.6924      | 0.0000   | 0.0000             | 0.0000             | 671.8554                | 663.3421                | 662.8501                |
| 2 V 11      | 201.1239 <sup>***</sup>  | 184.0974  | 183.1134                 | 1241.6553                | 1224.6288 | 1223.6448      | 0.0000   | 0.0000             | 0.0000             | 621.3315                | 612.8183                | 612.3263                |
| 3 T 10      | 302.1716 <sup>***</sup>  | 285.1451  | 284.1610 <sup>***</sup>  | 1142.5869 <sup>***</sup> | 1125.5603 | 1124.5763      | 0.0000   | 0.0000             | 0.0000             | 571.7974 <sup>***</sup> | 563.2841 <sup>***</sup> | 562.7921 <sup>***</sup> |
| 4 A 9       | 373.2087 <sup>***</sup>  | 356.1822  | 355.1982 <sup>***</sup>  | 1041.5392 <sup>***</sup> | 1024.5127 | 1023.5286      | 0.0000   | 0.0000             | 0.0000             | 521.2735 <sup>***</sup> | 512.7603                | 512.2682                |
| 5 M 8       | 520.2492                 | 503.2227  | 502.2386 <sup>***</sup>  | 970.5021 <sup>***</sup>  | 953.4755  | 952.4915       | 0.0000   | 0.0000             | 0.0000             | 485.7550 <sup>***</sup> | 477.2417                | 476.7497                |
| 6 D 7       | 635.2761                 | 618.2496  | 617.2656                 | 823.4616 <sup>***</sup>  | 806.4351  | 805.4510       | 0.0000   | 0.0000             | 0.0000             | 412.2347                | 403.7214                | 403.2294                |
| 7 V 6       | 734.3445                 | 717.3180  | 716.3340 <sup>***</sup>  | 708.4347 <sup>***</sup>  | 691.4081  | 690.4241       | 0.0000   | 0.0000             | 0.0000             | 354.7213                | 346.2080                | 345.7160                |
| 8 V 5       | 833.4130 <sup>***</sup>  | 816.3864  | 815.4024 <sup>***</sup>  | 609.3663 <sup>***</sup>  | 592.3397  | 591.3557       | 0.0000   | 0.0000             | 0.0000             | 0.0000                  | 0.0000                  | 0.0000                  |
| 9 Y 4       | 1012.4763 <sup>***</sup> | 995.4498  | 994.4657 <sup>***</sup>  | 510.2979 <sup>***</sup>  | 493.2713  | 492.2873       | 0.0000   | 0.0000             | 0.0000             | 0.0000                  | 0.0000                  | 0.0000                  |
| 10 A 3      | 1083.5134                | 1066.4868 | 1065.5028 <sup>***</sup> | 331.2345 <sup>***</sup>  | 314.2080  | 313.2240       | 0.0000   | 0.0000             | 0.0000             | 0.0000                  | 0.0000                  | 0.0000                  |
| 11 L 2      | 1196.5974 <sup>***</sup> | 1179.5709 | 1178.5869 <sup>***</sup> | 260.1974 <sup>***</sup>  | 243.1709  | 242.1868       | 0.0000   | 0.0000             | 0.0000             | 0.0000                  | 0.0000                  | 0.0000                  |
| 12 K 1      | 1324.6924                | 1307.0650 | 1306.0019                | 147.1130                 | 130.0060  | 129.1020       | 602.0501 | 654.3069           | 653.0440           | 0.0000                  | 0.0000                  | 0.0000                  |

# TVTAMDVVYALK<sub>f0</sub>R

## H4K91

K.TVTAMDVVYALKR.Q (+2) - Mod : 28.00 at K(12) - Retention time : 65.41 min - Precursor m/z : 747.91 - Precursor int. : 88127.700 - Basepeak int. : 5678.610

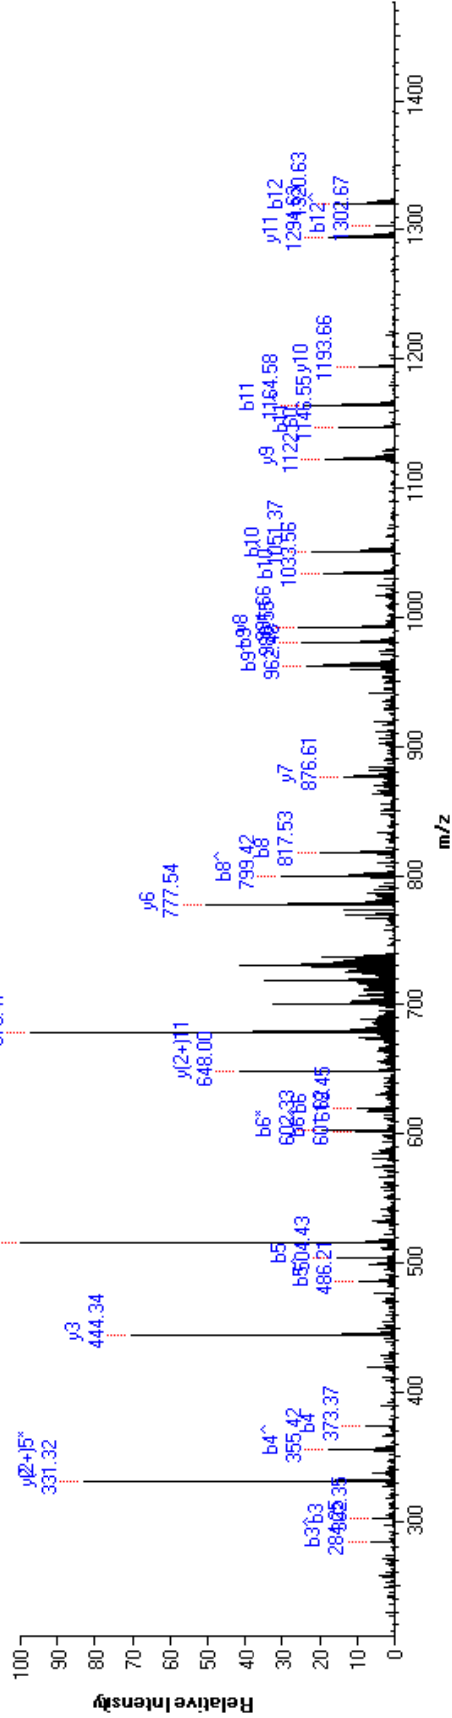

| (b) Seq (y) | b         | b <sup>+</sup> | y         | y <sup>+</sup> | y <sup>+</sup> | b(2+)     | b(2+) <sup>+</sup> | y(2+)  | y(2+) <sup>+</sup> | y(2+) <sup>+</sup> |
|-------------|-----------|----------------|-----------|----------------|----------------|-----------|--------------------|--------|--------------------|--------------------|
| 1 T 13      | 102.0555  | 85.0290        | 84.0449   | 1494.8041      | 1477.7776      | 1476.7936 | 0.0000             | 0.0000 | 747.9059           | 739.3927           |
| 2 V 12      | 201.1239  | 184.0974       | 183.1134  | 1393.7563      | 1376.7299      | 1375.7458 | 0.0000             | 0.0000 | 697.3821           | 688.8688           |
| 3 T 11      | 302.1716  | 285.1451       | 284.1610  | 1294.6880      | 1277.6615      | 1276.6775 | 0.0000             | 0.0000 | 647.8479           | 639.3347           |
| 4 A 10      | 373.2087  | 356.1822       | 355.1982  | 1193.6403      | 1176.6138      | 1175.6298 | 0.0000             | 0.0000 | 597.3241           | 588.8108           |
| 5 M 9       | 504.2492  | 487.2227       | 486.2386  | 1122.6031      | 1105.5767      | 1104.5927 | 0.0000             | 0.0000 | 561.8055           | 553.2922           |
| 6 D 8       | 619.2761  | 602.2496       | 601.2656  | 991.5627       | 974.5362       | 973.5522  | 0.0000             | 0.0000 | 496.2853           | 487.7720           |
| 7 V 7       | 718.3445  | 701.3180       | 700.3340  | 876.5358       | 859.5092       | 858.5252  | 0.0000             | 0.0000 | 438.7718           | 430.2585           |
| 8 V 6       | 817.4130  | 800.3864       | 799.4024  | 777.4673       | 760.4408       | 759.4568  | 0.0000             | 0.0000 | 389.2376           | 380.7243           |
| 9 Y 5       | 980.4763  | 963.4498       | 962.4657  | 678.3989       | 661.3724       | 660.3884  | 0.0000             | 0.0000 | 339.7034           | 331.1901           |
| 10 A 4      | 1051.5134 | 1034.4868      | 1033.5028 | 515.3356       | 498.3091       | 497.3251  | 0.0000             | 0.0000 | 0.0000             | 0.0000             |
| 11 L 3      | 1164.5974 | 1147.5709      | 1146.5869 | 444.2985       | 427.2720       | 426.2880  | 0.0000             | 0.0000 | 0.0000             | 0.0000             |
| 12 K 2      | 1320.6924 | 1303.6659      | 1302.6819 | 331.2144       | 314.1879       | 313.2039  | 0.0000             | 0.0000 | 0.0000             | 0.0000             |
| 13 R 1      | 1476.7936 | 1459.7670      | 1458.7830 | 175.1195       | 158.0930       | 157.1089  | 0.0000             | 0.0000 | 0.0000             | 0.0000             |

# TVTAMDVVYALK<sub>ac</sub>R

# H4K91

MS/MS Fragmentation of **TVTAMDVVYALKR**  
Found in **gi|28173560**, histone H4 [Homo sapiens]

Match to Query 29227: 1507.805944 from(754.910248,2+)  
From data file HelaHistoneH4\_CrotonylIP.dta

Click mouse within plot area to zoom in by factor of two about that  
Or, Plot from  to  Da

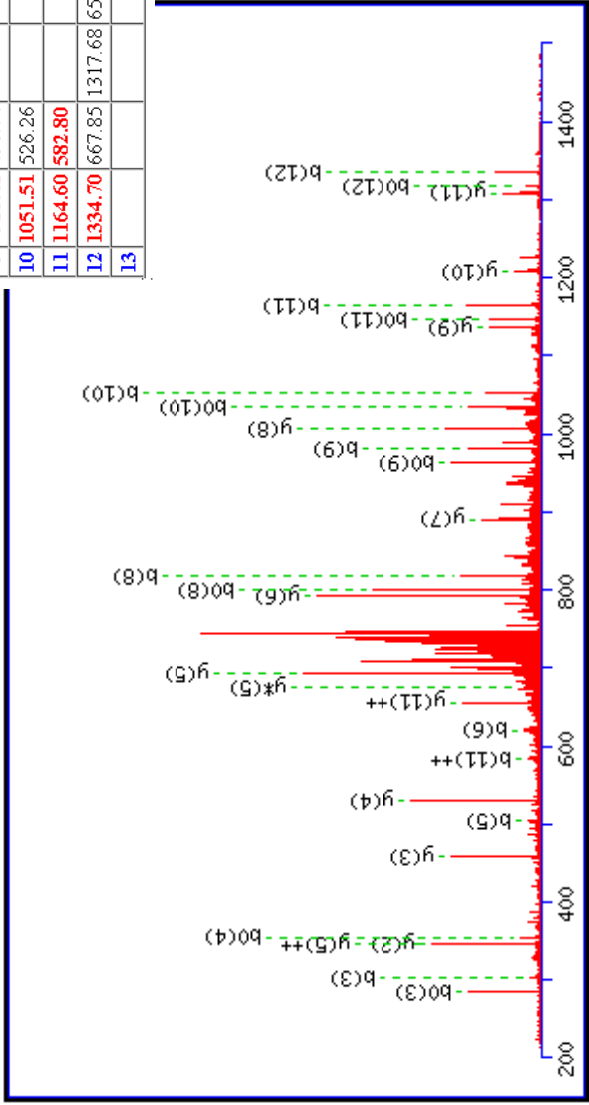

**Monoisotopic mass of neutral peptide Mr(calc): 1507.81**  
**Variable modifications:**  
**K12** : Acetyl (K)  
**Ions Score:** 56 **Expect:** 0.00073  
**Matches (Bold Red):** 29/108 fragment ions using 81 most intense peaks

| #  | b              | b <sup>++</sup> | b <sup>*</sup> | b <sup>++</sup> | b <sup>0</sup> | b <sup>0++</sup> | Seq. | y              | y <sup>++</sup> | y <sup>*</sup> | y <sup>++</sup> | y <sup>0</sup> | y <sup>0++</sup> | #  |
|----|----------------|-----------------|----------------|-----------------|----------------|------------------|------|----------------|-----------------|----------------|-----------------|----------------|------------------|----|
| 1  | 102.05         | 51.53           |                |                 | 84.04          | 42.53            | T    |                |                 |                |                 |                |                  | 13 |
| 2  | 201.12         | 101.07          |                |                 | 183.11         | 92.06            | V    | 1407.77        | 704.39          | 1390.74        | 695.87          | 1389.76        | 695.38           | 12 |
| 3  | <b>302.17</b>  | 151.59          |                |                 | <b>284.16</b>  | 142.58           | T    | <b>1308.70</b> | <b>654.85</b>   | 1291.67        | 646.34          | 1290.69        | 645.85           | 11 |
| 4  | 373.21         | 187.11          |                |                 | <b>355.20</b>  | 178.10           | A    | <b>1207.65</b> | 604.33          | 1190.62        | 595.82          | 1189.64        | 595.32           | 10 |
| 5  | <b>504.25</b>  | 252.63          |                |                 | 486.24         | 243.62           | M    | <b>1136.61</b> | 568.81          | 1119.59        | 560.30          | 1118.60        | 559.80           | 9  |
| 6  | <b>619.28</b>  | 310.14          |                |                 | 601.27         | 301.14           | D    | <b>1005.57</b> | 503.29          | 988.55         | 494.78          | 987.56         | 494.28           | 8  |
| 7  | 718.34         | 359.68          |                |                 | 700.33         | 350.67           | V    | <b>890.55</b>  | 445.78          | 873.52         | 437.26          |                |                  | 7  |
| 8  | <b>817.41</b>  | 409.21          |                |                 | <b>799.40</b>  | 400.20           | V    | <b>791.48</b>  | 396.24          | 774.45         | 387.73          |                |                  | 6  |
| 9  | <b>980.48</b>  | 490.74          |                |                 | <b>962.47</b>  | 481.74           | Y    | <b>692.41</b>  | <b>346.71</b>   | <b>675.38</b>  | 338.19          |                |                  | 5  |
| 10 | <b>1051.51</b> | 526.26          |                |                 | <b>1033.50</b> | 517.25           | A    | <b>529.35</b>  | 265.18          | 512.32         | 256.66          |                |                  | 4  |
| 11 | <b>1164.60</b> | <b>582.80</b>   |                |                 | <b>1146.59</b> | 573.80           | L    | <b>458.31</b>  | 229.66          | 441.28         | 221.14          |                |                  | 3  |
| 12 | <b>1334.70</b> | 667.85          | 1317.68        | 659.34          | <b>1316.69</b> | 658.85           | K    | <b>345.22</b>  | 173.12          | 328.20         | 164.60          |                |                  | 2  |
| 13 |                |                 |                |                 |                |                  | R    | 175.12         | 88.06           | 158.09         | 79.55           |                |                  | 1  |

# ac-SETAPAAPAAAPPAEK

H1.2S1

MS/MS Fragmentation of **SETAPAAPAAAPPAEK**

Found in **gi|197692471**, histone H1.2 [Homo sapiens]

Match to Query 17888: 1519.756994 from(760.885773,2+)

From data file D:\MinjiaTan\DTAconversion\DTAs\HelaHistone\_PrBeforeTrp\_2.

Click mouse within plot area to zoom in by factor of two about that point

Or, Plot from  to  Da

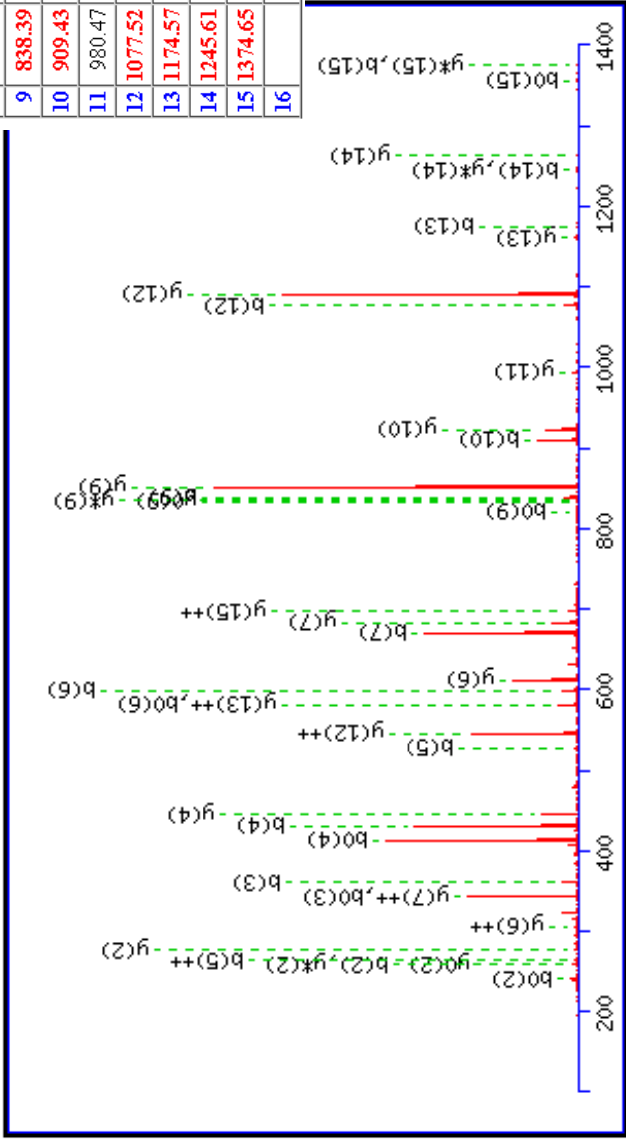

Monoisotopic mass of neutral peptide Mr(calc): 1519.75

Variable modifications:

S1 : Acetyl (S)

Ions Score: 64 Expect: 9.7e-005

Matches (**Bold Red**): 40/148 fragment ions using 82 most intense peaks

| #  | b              | b <sup>++</sup> | b <sup>0</sup> | b <sup>0++</sup> | Seq. | y              | y <sup>++</sup> | y <sup>*</sup> | y <sup>++</sup> | y <sup>0</sup> | y <sup>0++</sup> | #  |
|----|----------------|-----------------|----------------|------------------|------|----------------|-----------------|----------------|-----------------|----------------|------------------|----|
| 1  | 130.05         | 65.53           | 112.04         | 56.52            | S    |                |                 |                |                 |                |                  | 16 |
| 2  | <b>259.09</b>  | 130.05          | <b>241.08</b>  | 121.04           | E    | 1391.72        | <b>696.36</b>   | <b>1374.69</b> | 687.85          | 1373.71        | 687.36           | 15 |
| 3  | <b>360.14</b>  | 180.57          | <b>342.13</b>  | 171.57           | T    | <b>1262.67</b> | 631.84          | <b>1245.65</b> | 623.33          | 1244.66        | 622.84           | 14 |
| 4  | <b>431.18</b>  | 216.09          | <b>413.17</b>  | 207.09           | A    | <b>1161.63</b> | <b>581.32</b>   | 1144.60        | 572.80          | 1143.62        | 572.31           | 13 |
| 5  | <b>528.23</b>  | <b>264.62</b>   | 510.22         | 255.61           | P    | <b>1090.59</b> | <b>545.80</b>   | 1073.56        | 537.28          | 1072.58        | 536.79           | 12 |
| 6  | <b>599.27</b>  | 300.14          | <b>581.26</b>  | 291.13           | A    | <b>993.54</b>  | 497.27          | 976.51         | 488.76          | 975.53         | 488.27           | 11 |
| 7  | <b>670.30</b>  | 335.66          | 652.29         | 326.65           | A    | <b>922.50</b>  | 461.75          | 905.47         | 453.24          | 904.49         | 452.75           | 10 |
| 8  | 767.36         | 384.18          | 749.35         | 375.18           | P    | <b>851.46</b>  | 426.23          | <b>834.44</b>  | 417.72          | <b>833.45</b>  | 417.23           | 9  |
| 9  | <b>838.39</b>  | 419.70          | <b>820.38</b>  | 410.70           | A    | 754.41         | 377.71          | 737.38         | 369.20          | 736.40         | 368.70           | 8  |
| 10 | <b>909.43</b>  | 455.22          | 891.42         | 446.21           | A    | <b>683.37</b>  | <b>342.19</b>   | 666.35         | 333.68          | 665.36         | 333.18           | 7  |
| 11 | 980.47         | 490.74          | 962.46         | 481.73           | A    | <b>612.34</b>  | <b>306.67</b>   | 595.31         | 298.16          | 594.32         | 297.67           | 6  |
| 12 | <b>1077.52</b> | 539.26          | 1059.51        | 530.26           | P    | 541.30         | 271.15          | 524.27         | 262.64          | 523.29         | 262.15           | 5  |
| 13 | <b>1174.57</b> | 587.79          | 1156.56        | 578.79           | P    | <b>444.25</b>  | 222.63          | 427.22         | 214.11          | 426.23         | 213.62           | 4  |
| 14 | <b>1245.61</b> | 623.31          | 1227.60        | 614.30           | A    | 347.19         | 174.10          | 330.17         | 165.59          | 329.18         | 165.09           | 3  |
| 15 | <b>1374.65</b> | 687.83          | <b>1356.64</b> | 678.83           | E    | <b>276.16</b>  | 138.58          | <b>259.13</b>  | 130.07          | <b>258.14</b>  | 129.58           | 2  |
| 16 |                |                 |                |                  | K    | 147.11         | 74.06           | 130.09         | 65.55           |                |                  | 1  |

ac-SETAPAEATAPAPVEK

H1.5S1

MS/MS Fragmentation of SETAPAEATAPAPVEK

Found in gi4885381, histone H1.5 [Homo sapiens]

Match to Query 19740: 1639.789704 from(820.902128,2+)

From data file D:\MinjiaTan\DTAconversion\DTAs\HelaHistone\_PrBeforeTrp\_2

Click mouse within plot area to zoom in by factor of two about that point

Or, Plot from 200 to 1700 Da

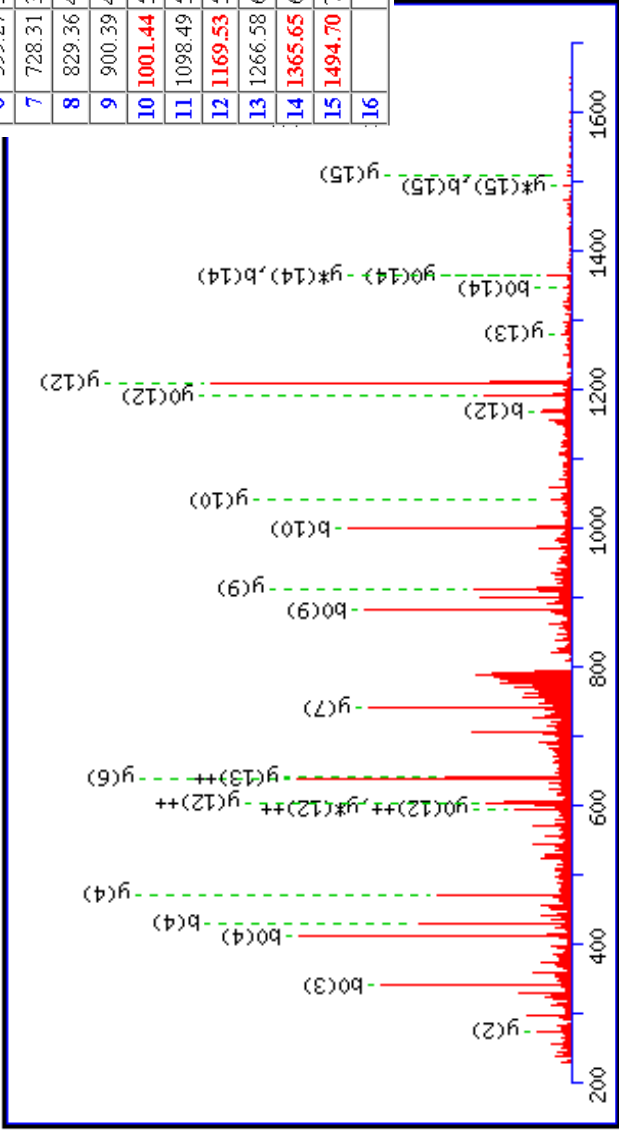

Monoisotopic mass of neutral peptide Mr(calc): 1639.79

Variable modifications:

S1 : Acetyl (S)

Ions Score: 43 Expect: 0.018

Matches (Bold Red): 26/148 fragment ions using 52 most intense peaks

| #  | b       | b <sup>++</sup> | b <sup>0</sup> | b <sup>0++</sup> | Seq. | y       | y <sup>++</sup> | y <sup>*</sup> | y <sup>++</sup> | y <sup>0</sup> | y <sup>0++</sup> | #  |
|----|---------|-----------------|----------------|------------------|------|---------|-----------------|----------------|-----------------|----------------|------------------|----|
| 1  | 130.05  | 65.53           | 112.04         | 56.52            | S    |         |                 |                |                 |                |                  | 16 |
| 2  | 259.09  | 130.05          | 241.08         | 121.04           | E    | 1511.76 | 756.38          | 1494.73        | 747.87          | 1493.75        | 747.38           | 15 |
| 3  | 360.14  | 180.57          | 342.13         | 171.57           | T    | 1382.72 | 691.86          | 1365.69        | 683.35          | 1364.71        | 682.86           | 14 |
| 4  | 431.18  | 216.09          | 413.17         | 207.09           | A    | 1281.67 | 641.34          | 1264.64        | 632.82          | 1263.66        | 632.33           | 13 |
| 5  | 528.23  | 264.62          | 510.22         | 255.61           | P    | 1210.63 | 605.82          | 1193.60        | 597.31          | 1192.62        | 596.81           | 12 |
| 6  | 599.27  | 300.14          | 581.26         | 291.13           | A    | 1113.58 | 557.29          | 1096.55        | 548.78          | 1095.57        | 548.29           | 11 |
| 7  | 728.31  | 364.66          | 710.30         | 355.65           | E    | 1042.54 | 521.77          | 1025.51        | 513.26          | 1024.53        | 512.77           | 10 |
| 8  | 829.36  | 415.18          | 811.35         | 406.18           | T    | 913.50  | 457.25          | 896.47         | 448.74          | 895.49         | 448.25           | 9  |
| 9  | 900.39  | 450.70          | 882.38         | 441.70           | A    | 812.45  | 406.73          | 795.42         | 398.22          | 794.44         | 397.72           | 8  |
| 10 | 1001.44 | 501.22          | 983.43         | 492.22           | T    | 741.41  | 371.21          | 724.39         | 362.70          | 723.40         | 362.21           | 7  |
| 11 | 1098.49 | 549.75          | 1080.48        | 540.75           | P    | 640.37  | 320.69          | 623.34         | 312.17          | 622.36         | 311.68           | 6  |
| 12 | 1169.53 | 585.27          | 1151.52        | 576.26           | A    | 543.31  | 272.16          | 526.29         | 263.65          | 525.30         | 263.16           | 5  |
| 13 | 1266.58 | 633.80          | 1248.57        | 624.79           | P    | 472.28  | 236.64          | 455.25         | 228.13          | 454.27         | 227.64           | 4  |
| 14 | 1365.65 | 683.33          | 1347.64        | 674.32           | V    | 375.22  | 188.12          | 358.20         | 179.60          | 357.21         | 179.11           | 3  |
| 15 | 1494.70 | 747.85          | 1476.69        | 738.85           | E    | 276.16  | 138.58          | 259.13         | 130.07          | 258.14         | 129.58           | 2  |
| 16 |         |                 |                |                  | K    | 147.11  | 74.06           | 130.09         | 65.55           |                |                  | 1  |

# SETAPAEATAPAVEKS<sub>p</sub>PAK

H1.5S17

MS/MS Fragmentation of **SETAPAEATAPAVEKSPAK**

Found in **gj|4885381**, histone H1.5 [Homo sapiens]

Match to Query 25808: 2060.960364 from(1031.487458,2+)

From data file HelaHistoneH1.dta

Click mouse within plot area to zoom in by factor of two about that point

Or, Plot from  to  Da

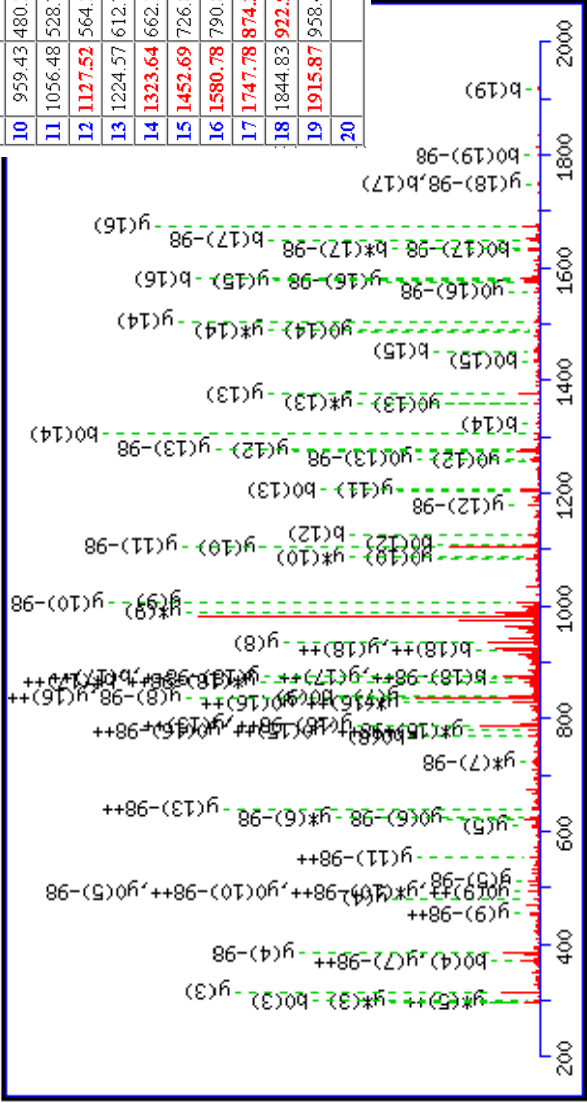

Monoisotopic mass of neutral peptide **Mr(calc)**: 2060.97

Variable modifications:

S17 : Phospho (STY), with neutral losses 0.00 (shown in table), 97.98

Ions Score: 61 **Expect**: 0.0014

**Matches (Bold Red)**: 80/306 fragment ions using 126 most intense peaks

| #         | b              | b <sup>++</sup> | b <sup>*</sup> | b <sup>++</sup> | b <sup>0</sup> | b <sup>0++</sup> | Seq.     | y              | y <sup>++</sup> | y <sup>*</sup> | y <sup>++</sup> | y <sup>0</sup> | y <sup>0++</sup> | #         |
|-----------|----------------|-----------------|----------------|-----------------|----------------|------------------|----------|----------------|-----------------|----------------|-----------------|----------------|------------------|-----------|
| <b>1</b>  | 88.04          | 44.52           |                |                 | 70.03          | 35.52            | <b>S</b> |                |                 |                |                 |                |                  | <b>20</b> |
| <b>2</b>  | 217.08         | 109.04          |                |                 | 199.07         | 100.04           | <b>E</b> | 1974.94        | 987.97          | 1957.92        | 979.46          | 1956.93        | 978.97           | <b>19</b> |
| <b>3</b>  | 318.13         | 159.57          |                |                 | <b>300.12</b>  | 150.56           | <b>T</b> | 1845.90        | <b>923.45</b>   | 1828.87        | 914.94          | 1827.89        | 914.45           | <b>18</b> |
| <b>4</b>  | 389.17         | 195.09          |                |                 | <b>371.16</b>  | 186.08           | <b>A</b> | 1744.85        | <b>872.93</b>   | 1727.83        | 864.42          | 1726.84        | 863.92           | <b>17</b> |
| <b>5</b>  | 486.22         | 243.61          |                |                 | 468.21         | 234.61           | <b>P</b> | <b>1673.81</b> | <b>837.41</b>   | 1656.79        | <b>828.90</b>   | 1655.80        | <b>828.41</b>    | <b>16</b> |
| <b>6</b>  | 557.26         | 279.13          |                |                 | 539.25         | 270.13           | <b>A</b> | <b>1576.76</b> | <b>788.88</b>   | 1559.74        | <b>780.37</b>   | 1558.75        | <b>779.88</b>    | <b>15</b> |
| <b>7</b>  | 686.30         | 343.65          |                |                 | 668.29         | 334.65           | <b>E</b> | <b>1505.72</b> | 753.37          | <b>1488.70</b> | 744.85          | <b>1487.71</b> | 744.36           | <b>14</b> |
| <b>8</b>  | 787.35         | 394.18          |                |                 | <b>769.34</b>  | 385.17           | <b>T</b> | <b>1376.68</b> | 688.84          | <b>1359.66</b> | 680.33          | <b>1358.67</b> | 679.84           | <b>13</b> |
| <b>9</b>  | 858.38         | 429.70          |                |                 | <b>840.37</b>  | 420.69           | <b>A</b> | <b>1275.63</b> | 638.32          | 1258.61        | 629.81          | <b>1257.62</b> | 629.32           | <b>12</b> |
| <b>10</b> | 959.43         | 480.22          |                |                 | 941.42         | 471.21           | <b>T</b> | <b>1204.60</b> | 602.80          | 1187.57        | 594.29          | 1186.59        | 593.80           | <b>11</b> |
| <b>11</b> | 1056.48        | 528.75          |                |                 | 1038.47        | 519.74           | <b>P</b> | <b>1103.55</b> | 552.28          | <b>1086.52</b> | 543.77          | <b>1085.54</b> | 543.27           | <b>10</b> |
| <b>12</b> | <b>1127.52</b> | 564.26          |                |                 | <b>1109.51</b> | 555.26           | <b>A</b> | <b>1006.50</b> | 503.75          | <b>989.47</b>  | 495.24          | 988.49         | <b>494.75</b>    | <b>9</b>  |
| <b>13</b> | 1224.57        | 612.79          |                |                 | <b>1206.56</b> | 603.79           | <b>P</b> | <b>935.46</b>  | 468.23          | 918.43         | 459.72          | 917.45         | 459.23           | <b>8</b>  |
| <b>14</b> | <b>1323.64</b> | 662.32          |                |                 | <b>1305.63</b> | 653.32           | <b>V</b> | <b>838.41</b>  | 419.71          | 821.38         | 411.19          | 820.40         | 410.70           | <b>7</b>  |
| <b>15</b> | <b>1452.69</b> | 726.85          |                |                 | <b>1434.67</b> | 717.84           | <b>E</b> | 739.34         | 370.17          | 722.31         | 361.66          | 721.33         | 361.17           | <b>6</b>  |
| <b>16</b> | <b>1580.78</b> | 790.89          |                |                 | 1563.75        | 782.38           |          |                |                 |                |                 |                |                  |           |
| <b>17</b> | <b>1747.78</b> | <b>874.39</b>   |                |                 | 1730.75        | <b>865.88</b>    | <b>K</b> | <b>610.30</b>  | 305.65          | 593.27         | <b>297.14</b>   | 592.29         | 296.65           | <b>5</b>  |
| <b>18</b> | 1844.83        | <b>922.92</b>   |                |                 | 1827.80        | 914.41           | <b>S</b> | <b>482.20</b>  | 241.60          | 465.17         | 233.09          | 464.19         | 232.60           | <b>4</b>  |
| <b>19</b> | <b>1915.97</b> | 958.44          |                |                 | 1898.84        | 949.92           | <b>P</b> | <b>315.20</b>  | 158.10          | <b>298.18</b>  | 149.59          |                |                  | <b>3</b>  |
| <b>20</b> |                |                 |                |                 | 1897.86        | 949.43           | <b>A</b> | 218.15         | 109.58          | 201.12         | 101.07          |                |                  | <b>2</b>  |
| <b>20</b> |                |                 |                |                 |                |                  | <b>K</b> | 147.11         | 74.06           | 130.09         | 65.55           |                |                  | <b>1</b>  |

# K<sub>me1</sub>ASGPPVSELITK

H1.2K36

MS/MS Fragmentation of **KASGPPVSELITK**

Found in **gi|197692471**, histone H1.2 [Homo sapiens]

Match to Query 15991: 1339.768122 from(447.596650,3+)  
From data file HelaHistoneH1.dta

Click mouse within plot area to zoom in by factor of two about that point  
Or, Plot from  to  Da

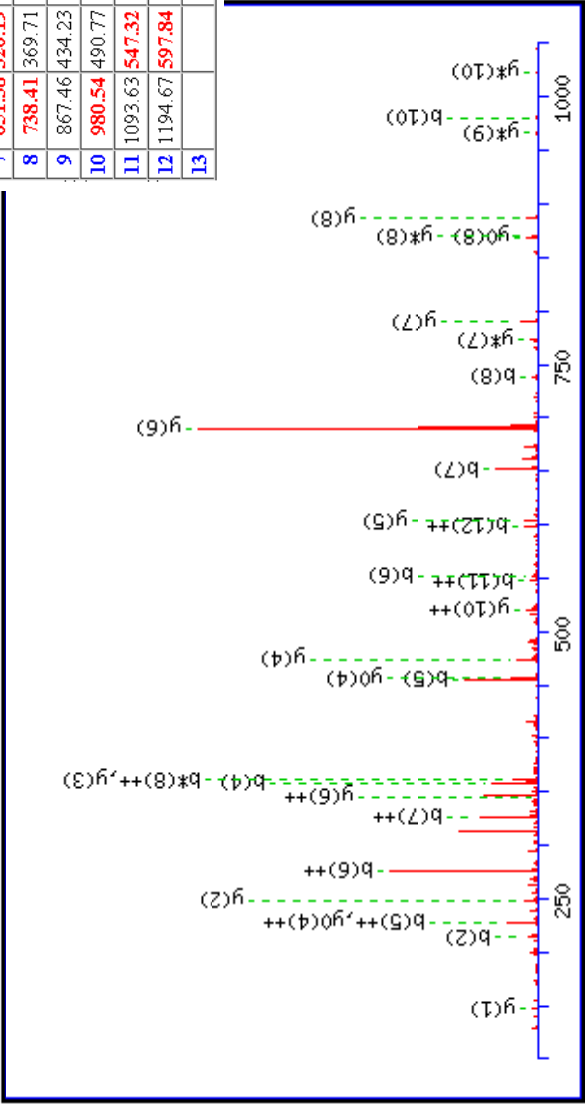

Monoisotopic mass of neutral peptide Mr(calc): 1339.77

Variable modifications:

K1 : Methyl (K)

Ions Score: 63 Expect: 0.00021

Matches (**Bold Red**): 30/138 fragment ions using 37 most intense peaks

| #  | b             | b <sup>++</sup> | b <sup>*</sup> | b <sup>++</sup> | b <sup>0</sup> | b <sup>0++</sup> | Seq. | y             | y <sup>++</sup> | y <sup>*</sup> | y <sup>++</sup> | y <sup>0</sup> | y <sup>0++</sup> | #  |
|----|---------------|-----------------|----------------|-----------------|----------------|------------------|------|---------------|-----------------|----------------|-----------------|----------------|------------------|----|
| 1  | 143.12        | 72.06           | 126.09         | 63.55           |                |                  | K    |               |                 |                |                 |                |                  | 13 |
| 2  | <b>214.16</b> | 107.58          | 197.13         | 99.07           |                |                  | A    | 1198.67       | 599.84          | 1181.64        | 591.32          | 1180.66        | 590.83           | 12 |
| 3  | 301.19        | 151.10          | 284.16         | 142.58          | 283.18         | 142.09           | S    | 1127.63       | 564.32          | 1110.60        | 555.81          | 1109.62        | 555.31           | 11 |
| 4  | <b>358.21</b> | 179.61          | 341.18         | 171.09          | 340.20         | 170.60           | G    | 1040.60       | <b>520.80</b>   | <b>1023.57</b> | 512.29          | 1022.59        | 511.80           | 10 |
| 5  | <b>455.26</b> | <b>228.13</b>   | 438.23         | 219.62          | 437.25         | 219.13           | P    | 983.58        | 492.29          | <b>966.55</b>  | 483.78          | 965.57         | 483.29           | 9  |
| 6  | <b>552.31</b> | <b>276.66</b>   | 535.29         | 268.15          | 534.30         | 267.66           | P    | <b>886.52</b> | 443.77          | <b>869.50</b>  | 435.25          | <b>868.51</b>  | 434.76           | 8  |
| 7  | <b>651.38</b> | <b>326.19</b>   | 634.36         | 317.68          | 633.37         | 317.19           | V    | <b>789.47</b> | 395.24          | <b>772.45</b>  | 386.73          | 771.46         | 386.23           | 7  |
| 8  | <b>738.41</b> | 369.71          | 721.39         | <b>361.20</b>   | 720.40         | 360.71           | S    | <b>690.40</b> | <b>345.71</b>   | 673.38         | 337.19          | 672.39         | 336.70           | 6  |
| 9  | 867.46        | 434.23          | 850.43         | 425.72          | 849.45         | 425.23           | E    | <b>603.37</b> | 302.19          | 586.34         | 293.68          | 585.36         | 293.18           | 5  |
| 10 | <b>980.54</b> | 490.77          | 963.51         | 482.26          | 962.53         | 481.77           | L    | <b>474.33</b> | 237.67          | 457.30         | 229.15          | <b>456.32</b>  | <b>228.66</b>    | 4  |
| 11 | 1093.63       | <b>547.32</b>   | 1076.60        | 538.80          | 1075.61        | 538.31           | I    | <b>361.24</b> | 181.13          | 344.22         | 172.61          | 343.23         | 172.12           | 3  |
| 12 | 1194.67       | <b>597.84</b>   | 1177.65        | 589.33          | 1176.66        | 588.83           | T    | <b>248.16</b> | 124.58          | 231.13         | 116.07          | 230.15         | 115.58           | 2  |
| 13 |               |                 |                |                 |                |                  | K    | <b>147.11</b> | 74.06           | 130.09         | 65.55           |                |                  | 1  |

# K<sub>pm</sub>ASGPPVSELITK<sub>pr</sub>AVAASK<sub>pr</sub>ER

## H1.2K36

MS/MS Fragmentation of **KASGPPVSELITKAVAASKER**

Found in **gj197692471**, histone H1.2 [Homo sapiens]

Match to Query 26911: 2320.304031 from(774.441953,3+)

From data file D:\MinjiaTan\DTAconversion\DTAs\HelaHistone\_PrBeforeTrp\_2.d

Click mouse within plot area to zoom in by factor of two about that point

Or, Plot from  to  Da

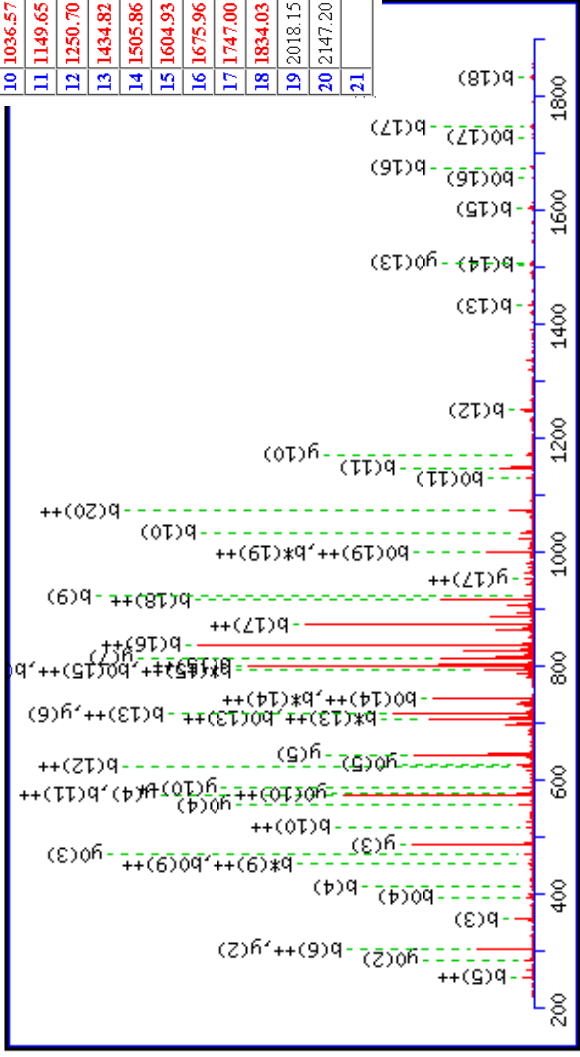

Monoisotopic mass of neutral peptide Mr(calc): 2320.30

Variable modifications:

K1 : PropionylMethyl (K)

K13 : Propionyl (K)

K19 : Propionyl (K)

Ions Score: 62 Expect: 0.00061

Matches (**Bold Red**): 53/234 fragment ions using 92 most intense peaks

| #  | b              | b <sup>++</sup> | b <sup>*</sup> | b <sup>++</sup> | b <sup>0</sup> | b <sup>++</sup> | b <sup>0</sup> | b <sup>++</sup> | Seq. | y             | y <sup>++</sup> | y <sup>*</sup> | y <sup>++</sup> | y <sup>0</sup> | y <sup>++</sup> | #  |
|----|----------------|-----------------|----------------|-----------------|----------------|-----------------|----------------|-----------------|------|---------------|-----------------|----------------|-----------------|----------------|-----------------|----|
| 1  | 199.14         | 100.08          | 182.12         | 91.56           |                |                 |                |                 | K    | 2123.17       | 1062.09         | 2106.14        | 1053.58         | 2105.16        | 1053.08         | 21 |
| 2  | 270.18         | 135.59          | 253.15         | 127.08          |                |                 |                |                 | A    | 2052.13       | 1026.57         | 2035.11        | 1018.06         | 2034.12        | 1017.57         | 20 |
| 3  | <b>357.21</b>  | 179.11          | 340.19         | 170.60          | 339.20         | 170.10          |                |                 | S    | 1965.10       | 983.05          | 1948.07        | 974.54          | 1947.09        | 974.05          | 19 |
| 4  | <b>414.23</b>  | 207.62          | 397.21         | 199.11          | <b>396.22</b>  | 198.62          |                |                 | G    | 1908.08       | <b>954.54</b>   | 1891.05        | 946.03          | 1890.07        | 945.54          | 18 |
| 5  | 511.29         | <b>256.15</b>   | 494.26         | 247.63          | 493.28         | 247.14          |                |                 | P    | 1811.03       | 906.02          | 1794.00        | 897.50          | 1793.02        | 897.01          | 17 |
| 6  | 608.34         | <b>304.67</b>   | 591.31         | 296.16          | 590.33         | 295.67          |                |                 | P    | 1713.97       | 857.49          | 1696.95        | 848.98          | 1695.96        | 848.49          | 16 |
| 7  | 707.41         | 354.21          | 690.38         | 345.69          | 689.40         | 345.20          |                |                 | V    | 1614.91       | 807.96          | 1597.88        | 799.44          | 1596.90        | 798.95          | 15 |
| 8  | <b>794.44</b>  | 397.72          | 777.41         | 389.21          | 776.43         | 388.72          |                |                 | S    | 1527.87       | 764.44          | 1510.85        | 755.93          | <b>1509.86</b> | 755.44          | 14 |
| 9  | <b>923.48</b>  | 462.25          | 906.46         | <b>453.73</b>   | 905.47         | <b>453.24</b>   |                |                 | E    | 1398.83       | 699.92          | 1381.80        | 691.41          | 1380.82        | 690.91          | 13 |
| 10 | <b>1036.57</b> | <b>518.79</b>   | 1019.54        | 510.27          | 1018.56        | 509.78          |                |                 | L    | 1285.75       | 643.38          | 1268.72        | 634.86          | 1267.74        | 634.37          | 12 |
| 11 | <b>1149.65</b> | <b>575.33</b>   | 1132.62        | 566.82          | <b>1131.64</b> | 566.32          |                |                 | I    | 1071.62       | 536.31          | 1054.59        | 527.80          | 1053.61        | 527.31          | 11 |
| 12 | <b>1250.70</b> | <b>625.85</b>   | 1233.67        | 617.34          | 1232.69        | 616.85          |                |                 | T    | 887.49        | 444.25          | 870.47         | 435.74          | 869.48         | 435.25          | 10 |
| 13 | <b>1434.82</b> | <b>717.91</b>   | 1417.79        | <b>709.40</b>   | 1416.81        | <b>708.91</b>   |                |                 | K    | 837.49        | 408.73          | 820.47         | 400.22          | 798.45         | 399.73          | 9  |
| 14 | <b>1505.86</b> | 753.43          | 1488.83        | <b>744.92</b>   | 1487.85        | <b>744.43</b>   |                |                 | A    | 717.39        | 359.20          | 700.36         | 350.68          | 699.38         | 350.19          | 8  |
| 15 | <b>1604.93</b> | <b>802.97</b>   | 1587.90        | <b>794.45</b>   | 1586.92        | <b>793.96</b>   |                |                 | V    | 646.35        | 323.68          | 629.33         | 315.17          | <b>628.34</b>  | 314.67          | 7  |
| 16 | <b>1675.96</b> | <b>838.49</b>   | 1658.94        | 829.97          | <b>1657.95</b> | 829.48          |                |                 | A    | 575.31        | 288.16          | 558.29         | 279.65          | <b>557.30</b>  | 279.16          | 6  |
| 17 | <b>1747.00</b> | <b>874.00</b>   | 1729.97        | 865.49          | <b>1728.99</b> | 865.00          |                |                 | A    | 488.28        | 244.64          | 471.26         | 236.13          | <b>470.27</b>  | 235.64          | 5  |
| 18 | <b>1834.03</b> | <b>917.52</b>   | 1817.01        | 909.01          | 1816.02        | 908.51          |                |                 | S    | <b>304.16</b> | 152.58          | 287.13         | 144.07          | <b>286.15</b>  | 143.58          | 4  |
| 19 | 2018.15        | 1009.58         | 2001.13        | <b>1001.07</b>  | 2000.14        | <b>1000.57</b>  |                |                 | K    |               |                 |                |                 |                |                 | 3  |
| 20 | 2147.20        | <b>1074.10</b>  | 2130.17        | 1065.59         | 2129.19        | 1065.10         |                |                 | E    |               |                 |                |                 |                |                 | 2  |
| 21 |                |                 |                |                 |                |                 |                |                 | R    | 175.12        | 88.06           | 158.09         | 79.55           |                |                 | 1  |

# K<sub>fo</sub>ASGPPVSELITK

# H1.2K36

MS/MS Fragmentation of **KASGPPVSELITK**

Found in **gi|197692471**, histone H1.2 [Homo sapiens]

Match to Query 16251: 1353.747834 from(677.881193,2+)

From data file HelaHistoneH1. dta

Click mouse within plot area to zoom in by factor of two about that point

Or, Plot from  to  Da

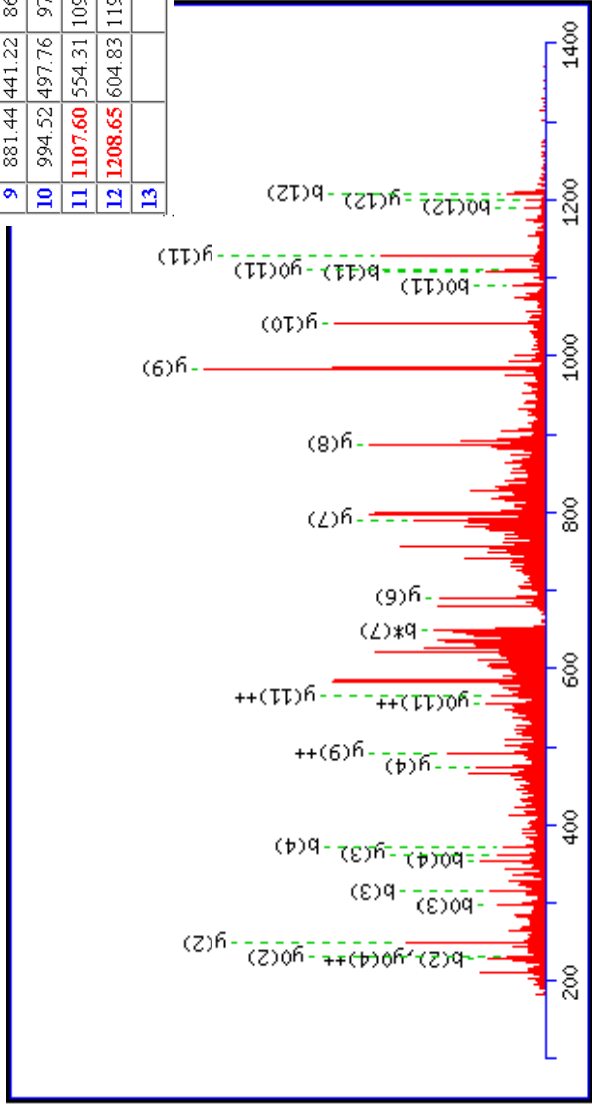

Monoisotopic mass of neutral peptide **Mr(calc)**: 1353.75

Variable modifications:

K1 : Formyl1 (K)

Ions Score: 47 Expect: 0.0085

Matches (**Bold Red**): 26/138 fragment ions using 77 most intense peaks

| #         | b              | b <sup>++</sup> | b <sup>+</sup> | b <sup>++</sup> | b <sup>0</sup> | b <sup>0++</sup> | Seq.     | y              | y <sup>++</sup> | y <sup>+</sup> | y <sup>0</sup> | y <sup>0++</sup> | #             |
|-----------|----------------|-----------------|----------------|-----------------|----------------|------------------|----------|----------------|-----------------|----------------|----------------|------------------|---------------|
| <b>1</b>  | 157.10         | 79.05           | 140.07         | 70.54           |                |                  | <b>K</b> |                |                 |                |                |                  | <b>13</b>     |
| <b>2</b>  | <b>228.13</b>  | 114.57          | 211.11         | 106.06          |                |                  | <b>A</b> | <b>1198.67</b> | 599.84          | 1181.64        | 591.32         | 1180.66          | 590.83        |
| <b>3</b>  | <b>315.17</b>  | 158.09          | 298.14         | 149.57          | <b>297.16</b>  | 149.08           | <b>S</b> | <b>1127.63</b> | <b>564.32</b>   | 1110.60        | 555.81         | <b>1109.62</b>   | <b>555.31</b> |
| <b>4</b>  | <b>372.19</b>  | 186.60          | 355.16         | 178.08          | <b>354.18</b>  | 177.59           | <b>G</b> | <b>1040.60</b> | 520.80          | 1023.57        | 512.29         | 1022.59          | 511.80        |
| <b>5</b>  | 469.24         | 235.12          | 452.21         | 226.61          | 451.23         | 226.12           | <b>P</b> | <b>983.58</b>  | <b>492.29</b>   | 966.55         | 483.78         | 965.57           | 483.29        |
| <b>6</b>  | 566.29         | 283.65          | 549.27         | 275.14          | 548.28         | 274.64           | <b>P</b> | <b>886.52</b>  | 443.77          | 869.50         | 435.25         | 868.51           | 434.76        |
| <b>7</b>  | 665.36         | 333.18          | <b>648.34</b>  | 324.67          | 647.35         | 324.18           | <b>V</b> | <b>789.47</b>  | 395.24          | 772.45         | 386.73         | 771.46           | 386.23        |
| <b>8</b>  | 752.39         | 376.70          | 735.37         | 368.19          | 734.38         | 367.70           | <b>S</b> | <b>690.40</b>  | 345.71          | 673.38         | 337.19         | 672.39           | 336.70        |
| <b>9</b>  | 881.44         | 441.22          | 864.41         | 432.71          | 863.43         | 432.22           | <b>E</b> | 603.37         | 302.19          | 586.34         | 293.68         | 585.36           | 293.18        |
| <b>10</b> | 994.52         | 497.76          | 977.49         | 489.25          | 976.51         | 488.76           | <b>L</b> | <b>474.33</b>  | 237.67          | 457.30         | 229.15         | 456.32           | <b>228.66</b> |
| <b>11</b> | <b>1107.60</b> | 554.31          | 1090.58        | 545.79          | <b>1089.59</b> | 545.30           | <b>I</b> | <b>361.24</b>  | 181.13          | 344.22         | 172.61         | 343.23           | 172.12        |
| <b>12</b> | <b>1208.65</b> | 604.83          | 1191.63        | 596.32          | <b>1190.64</b> | 595.82           | <b>T</b> | <b>248.16</b>  | 124.58          | 231.13         | 116.07         | <b>230.15</b>    | 115.58        |
| <b>13</b> |                |                 |                |                 |                |                  | <b>K</b> | 147.11         | 74.06           | 130.09         | 65.55          |                  | <b>1</b>      |

# ASGPPVSELITK<sub>f0</sub>AVAASK

## H1.2K48

K.ASGPPVSELITKAVAASK E (+3) - Mod : 28.00 at K(12) - Retention time : 30.23 min - Precursor m/z : 585.33 - Precursor int. : 73593.500 - Basepeak int. : 12583.900

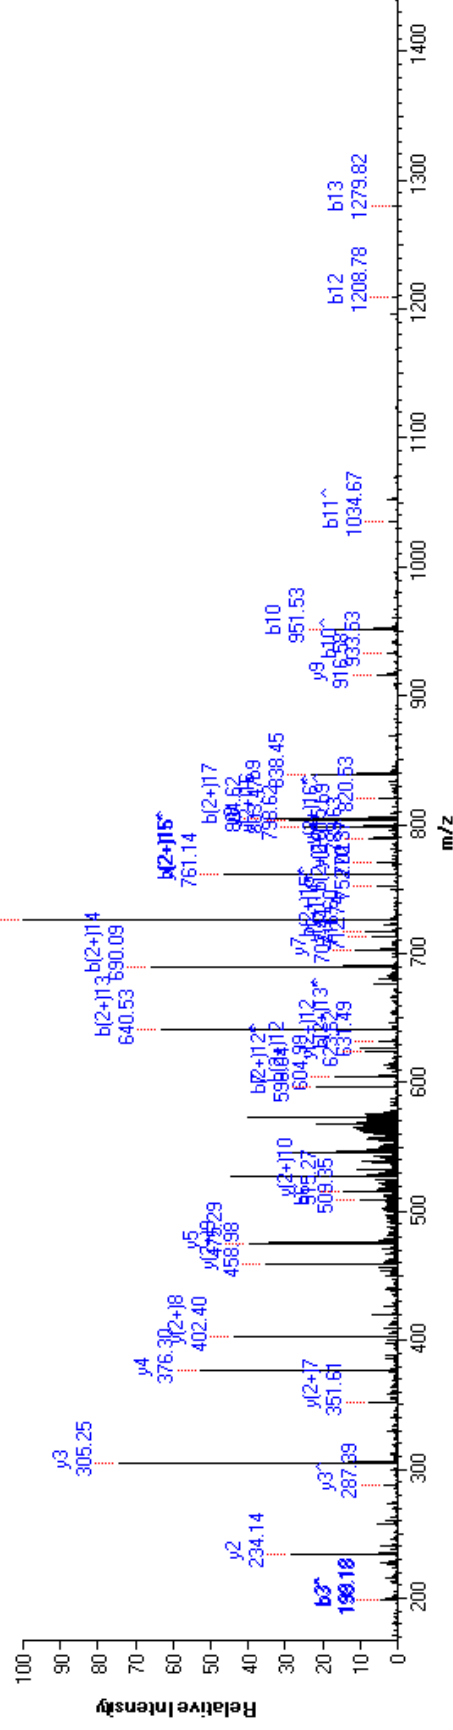

| (b) Seq (y) | b         | b*        | b <sup>+</sup> | y         | y*        | y <sup>+</sup> | b(2+)    | b(2+)*   | b(2+) <sup>+</sup> | y(2+)    | y(2+)*   | y(2+) <sup>+</sup> |
|-------------|-----------|-----------|----------------|-----------|-----------|----------------|----------|----------|--------------------|----------|----------|--------------------|
| 1 A 18      | 72.0449   | 55.0184   | 54.0344        | 1753.9750 | 1736.9485 | 1735.9645      | 0.0000   | 0.0000   | 0.0000             | 877.4915 | 868.9781 | 868.4861           |
| 2 S 17      | 159.0770  | 142.0504  | 141.0664       | 1682.9379 | 1665.9114 | 1664.9274      | 0.0000   | 0.0000   | 0.0000             | 841.9728 | 833.4596 | 832.9676           |
| 3 G 16      | 216.0984  | 199.0719  | 198.0879       | 1595.9059 | 1578.8794 | 1577.8953      | 0.0000   | 0.0000   | 0.0000             | 798.4568 | 789.9436 | 789.4516           |
| 4 P 15      | 313.1512  | 296.1246  | 295.1406       | 1538.8844 | 1521.8579 | 1520.8739      | 0.0000   | 0.0000   | 0.0000             | 769.9461 | 761.4329 | 760.9409           |
| 5 P 14      | 410.2039  | 393.1774  | 392.1934       | 1441.8317 | 1424.8052 | 1423.8210      | 0.0000   | 0.0000   | 0.0000             | 721.4197 | 712.9065 | 712.4145           |
| 6 V 13      | 509.2724  | 492.2458  | 491.2618       | 1344.7789 | 1327.7523 | 1326.7683      | 0.0000   | 0.0000   | 0.0000             | 672.8934 | 664.3801 | 663.8881           |
| 7 S 12      | 596.3044  | 579.2778  | 578.2938       | 1245.7104 | 1228.6840 | 1227.7000      | 0.0000   | 0.0000   | 0.0000             | 623.3591 | 614.8459 | 614.3539           |
| 8 E 11      | 725.3470  | 708.3204  | 707.3364       | 1158.6785 | 1141.6520 | 1140.6678      | 0.0000   | 0.0000   | 0.0000             | 579.8431 | 571.3299 | 570.8379           |
| 9 L 10      | 838.4310  | 821.4045  | 820.4205       | 1029.6359 | 1012.6093 | 1011.6253      | 0.0000   | 0.0000   | 0.0000             | 515.3218 | 506.8086 | 506.3166           |
| 10 I 9      | 951.5151  | 934.4885  | 933.5045       | 916.5518  | 899.5253  | 898.5413       | 0.0000   | 0.0000   | 0.0000             | 458.7798 | 450.2665 | 449.7745           |
| 11 T 8      | 1052.5627 | 1035.5363 | 1034.5522      | 803.4678  | 786.4412  | 785.4572       | 0.0000   | 0.0000   | 0.0000             | 402.2378 | 393.7245 | 393.2325           |
| 12 K 7      | 1208.6577 | 1191.6312 | 1190.6472      | 702.4201  | 685.3936  | 684.4095       | 604.8328 | 596.3195 | 595.8275           | 351.7140 | 343.2007 | 342.7087           |
| 13 A 6      | 1279.6948 | 1262.6683 | 1261.6843      | 546.3251  | 529.2986  | 528.3146       | 640.3513 | 631.8381 | 631.3461           | 0.0000   | 0.0000   | 0.0000             |
| 14 V 5      | 1378.7633 | 1361.7367 | 1360.7527      | 475.2880  | 458.2615  | 457.2774       | 689.8956 | 681.3723 | 680.8802           | 0.0000   | 0.0000   | 0.0000             |
| 15 A 4      | 1449.8004 | 1432.7738 | 1431.7898      | 376.2196  | 359.1931  | 358.2090       | 725.4041 | 716.8908 | 716.3988           | 0.0000   | 0.0000   | 0.0000             |
| 16 A 3      | 1520.8375 | 1503.8109 | 1502.8269      | 305.1825  | 288.1559  | 287.1719       | 760.9227 | 752.4094 | 751.9174           | 0.0000   | 0.0000   | 0.0000             |
| 17 S 2      | 1607.8695 | 1590.8430 | 1589.8589      | 234.1454  | 217.1188  | 216.1348       | 804.4387 | 795.9254 | 795.4334           | 0.0000   | 0.0000   | 0.0000             |
| 18 K 1      | 1735.9645 | 1718.9379 | 1717.9539      | 147.1133  | 130.0868  | 129.1028       | 868.4861 | 859.9729 | 859.4808           | 0.0000   | 0.0000   | 0.0000             |

# ASGPPVSELITK<sub>10</sub>AVAASK

H1.2K48

MS/MS Fragmentation of **ASGPPVSELITKAVAASK**

Found in **gi|197692471**, histone H1.2 [Homo sapiens]

Match to Query 22620: 1752.959264 from(877.486908,2+)

From data file HelaHistoneH1.dta

Click mouse within plot area to zoom in by factor of two about that point

Or, Plot from  to  Da

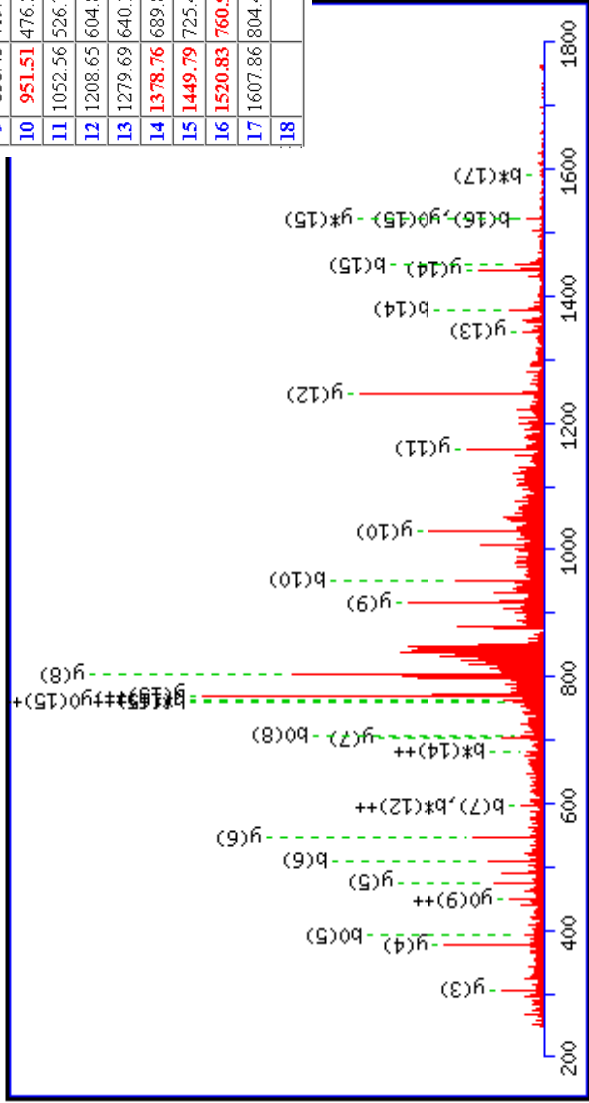

**Monoisotopic mass of neutral peptide Mr(calc): 1752.96**

**Variable modifications:**

**K12** : Formyl (K)

**Ions Score: 70 Expect: 0.0001**

**Matches (Bold Red): 30/178** fragment ions using 62 most intense peaks

| #  | b       | b <sup>++</sup> | b <sup>*</sup> | b <sup>+++</sup> | b <sup>0</sup> | b <sup>0++</sup> | Seq. | y       | y <sup>++</sup> | y <sup>*</sup> | y <sup>+++</sup> | y <sup>0</sup> | y <sup>0++</sup> | #  |
|----|---------|-----------------|----------------|------------------|----------------|------------------|------|---------|-----------------|----------------|------------------|----------------|------------------|----|
| 1  | 72.04   | 36.53           |                |                  |                |                  | A    | 1682.93 | 841.97          | 1665.91        | 833.46           | 1664.92        | 832.96           | 18 |
| 2  | 159.08  | 80.04           |                |                  | 141.07         | 71.04            | S    | 1592.90 | 798.45          | 1578.87        | 789.94           | 1577.89        | 789.45           | 17 |
| 3  | 216.10  | 108.55          |                |                  | 198.09         | 99.55            | G    | 1538.88 | 769.94          | 1521.85        | 761.43           | 1520.87        | 760.94           | 16 |
| 4  | 313.15  | 157.08          |                |                  | 295.14         | 148.07           | P    | 1441.83 | 721.42          | 1424.80        | 712.90           | 1423.82        | 712.41           | 15 |
| 5  | 410.20  | 205.61          |                |                  | 392.19         | 196.60           | P    | 1344.77 | 672.89          | 1327.75        | 664.38           | 1326.76        | 663.88           | 14 |
| 6  | 509.27  | 255.14          |                |                  | 491.26         | 246.13           | V    | 1245.70 | 623.36          | 1228.68        | 614.84           | 1227.69        | 614.35           | 13 |
| 7  | 596.30  | 298.66          |                |                  | 578.29         | 289.65           | S    | 1158.67 | 579.84          | 1141.65        | 571.33           | 1140.66        | 570.83           | 12 |
| 8  | 725.35  | 363.18          |                |                  | 707.34         | 354.17           | E    | 1029.63 | 515.32          | 1012.60        | 506.81           | 1011.62        | 506.31           | 11 |
| 9  | 838.43  | 419.72          |                |                  | 820.42         | 410.71           | L    | 916.55  | 458.78          | 899.52         | 450.26           | 898.54         | 449.77           | 10 |
| 10 | 951.51  | 476.26          |                |                  | 933.50         | 467.26           | I    | 803.46  | 402.23          | 786.44         | 393.72           | 785.45         | 393.23           | 9  |
| 11 | 1052.56 | 526.78          |                |                  | 1034.55        | 517.78           | T    | 702.41  | 351.71          | 685.39         | 343.20           | 684.40         | 342.71           | 8  |
| 12 | 1208.65 | 604.83          | 1191.63        | 596.32           | 1190.64        | 595.82           | K    | 546.32  | 273.67          | 529.30         | 265.15           | 528.31         | 264.66           | 7  |
| 13 | 1279.69 | 640.35          | 1262.66        | 631.83           | 1261.68        | 631.34           | A    | 475.29  | 238.15          | 458.26         | 229.63           | 457.28         | 229.14           | 6  |
| 14 | 1378.76 | 689.88          | 1361.73        | 681.37           | 1360.75        | 680.88           | V    | 376.22  | 188.61          | 359.19         | 180.10           | 358.21         | 179.61           | 5  |
| 15 | 1449.79 | 725.40          | 1432.77        | 716.89           | 1431.78        | 716.40           | A    | 305.18  | 153.09          | 288.16         | 144.58           | 287.17         | 144.09           | 4  |
| 16 | 1520.83 | 760.92          | 1503.81        | 752.41           | 1502.82        | 751.91           | A    | 234.14  | 117.58          | 217.12         | 109.06           | 216.13         | 108.57           | 3  |
| 17 | 1607.86 | 804.44          | 1590.84        | 795.92           | 1589.85        | 795.43           | S    | 147.11  | 74.06           | 130.09         | 65.55            |                |                  | 2  |
| 18 |         |                 |                |                  |                |                  | K    |         |                 |                |                  |                |                  | 1  |

**K<sub>pr</sub>ATGPPVSELITK<sub>ac</sub>AVAASK<sub>pr</sub>ER**

# H1.5K48

R.KATGPPVSELTIK(14)VASKER.N (+3) • Mod : 0.08 at 0(•1) • Retention time : 86.45 min • Precursor m/z : 769.77 • Precursor int. : 42161100.000 • Basepeak int. : 16699000.000

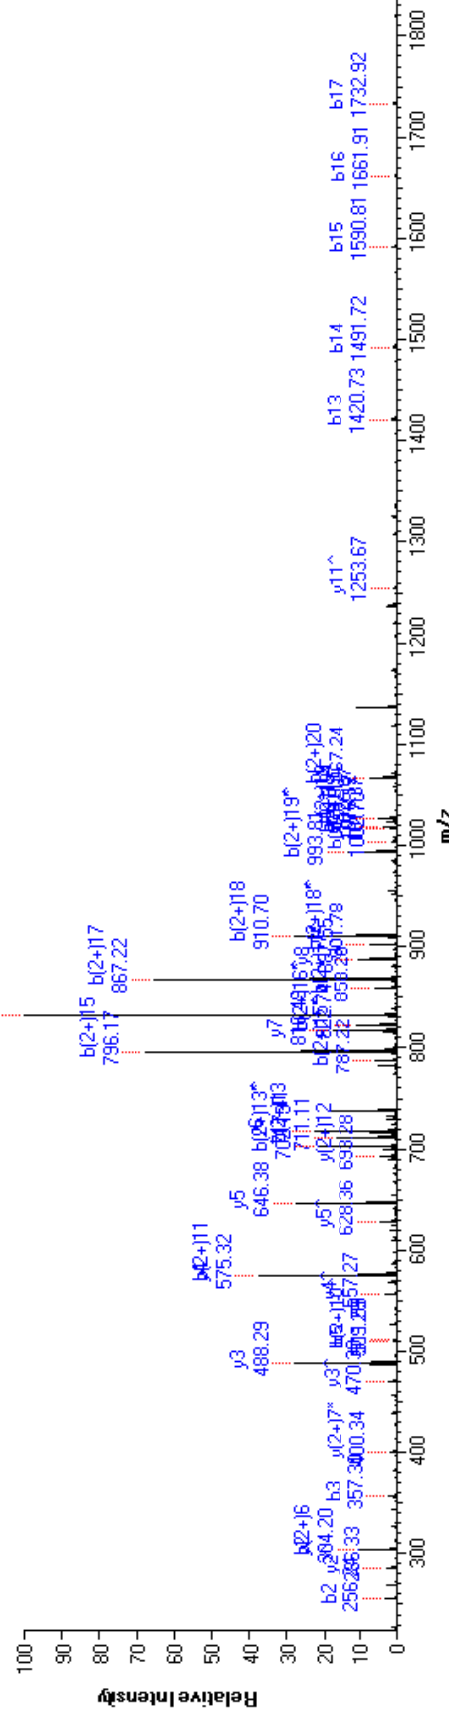

| (b) Seq (y) | b            | b*        | b^           | y           | y^        | y^           | b(2+)        | b(2+)^      | y(2+)        | y(2+)^       | y(2+)^    |
|-------------|--------------|-----------|--------------|-------------|-----------|--------------|--------------|-------------|--------------|--------------|-----------|
| 1 K 21      | 185.1028     | 168.0762  | 167.0922     | 2307.2292   | 2290.2029 | 2289.2188    | 0.0000       | 0.0000      | 1154.1185    | 1145.6053    | 1145.1133 |
| 2 A 20      | 256.1399 **  | 239.1134  | 238.1293     | 2123.1343   | 2106.1079 | 2105.1238    | 0.0000       | 0.0000      | 1062.0710    | 1053.5579    | 1053.0658 |
| 3 T 19      | 357.1876 **  | 340.1610  | 339.1770     | 2052.0972   | 2035.0707 | 2034.0867    | 0.0000       | 0.0000      | 1026.5525 ** | 1018.0392 ** | 1017.5472 |
| 4 G 18      | 414.2090     | 397.1825  | 396.1985     | 1951.0496   | 1934.0231 | 1933.0391    | 0.0000       | 0.0000      | 976.0287     | 967.5154     | 967.0234  |
| 5 P 17      | 511.2618 **  | 494.2353  | 493.2512     | 1894.0281   | 1877.0016 | 1876.0176    | 0.0000       | 0.0000      | 947.5179     | 939.0047     | 938.5127  |
| 6 P 16      | 608.3146     | 591.2880  | 590.3040     | 1796.9753   | 1779.9489 | 1778.9648    | 304.6612 **  | 0.0000      | 898.9916     | 890.4783     | 889.9863  |
| 7 V 15      | 707.3829     | 690.3564  | 689.3724     | 1699.9226   | 1682.8961 | 1681.9120    | 354.1954     | 345.6821    | 850.4652     | 841.9520     | 841.4600  |
| 8 S 14      | 794.4150     | 777.3884  | 776.4044     | 1600.8542   | 1583.8276 | 1582.8436    | 397.7114     | 389.1982    | 800.9310     | 792.4177     | 791.9257  |
| 9 E 13      | 923.4576     | 906.4310  | 905.4470     | 1513.8221   | 1496.7957 | 1495.8116    | 462.2327     | 453.7194    | 757.4150     | 748.9017     | 748.4097  |
| 10 L 12     | 1036.5416    | 1019.5151 | 1018.5311 ** | 1384.7795   | 1367.7531 | 1366.7690    | 518.7747     | 510.2615    | 692.8937 **  | 684.3804     | 683.8884  |
| 11 I 11     | 1149.6257    | 1132.5991 | 1131.6151    | 1271.6956   | 1254.6689 | 1253.6849 ** | 575.3168 **  | 566.8035    | 636.3517     | 627.8384     | 627.3464  |
| 12 T 10     | 1250.6733    | 1233.6489 | 1232.6628    | 1158.6115   | 1141.5850 | 1140.6010    | 625.8406     | 616.8353    | 579.8096     | 571.2964     | 570.8044  |
| 13 K 9      | 1420.7683 ** | 1403.7418 | 1402.7578    | 1057.5637   | 1040.5372 | 1039.5532    | 710.8881 **  | 702.3748 ** | 529.2858     | 520.7725     | 520.2805  |
| 14 A 8      | 1491.8054 ** | 1474.7789 | 1473.7949    | 887.4688 ** | 870.4423  | 869.4583     | 746.4066     | 737.8934    | 448.2383     | 435.7250     | 435.2330  |
| 15 V 7      | 1590.8739 ** | 1573.8473 | 1572.8633    | 816.4317 ** | 799.4052  | 798.4211     | 795.9409 **  | 786.9355 ** | 400.7198     | 400.2065 **  | 399.7145  |
| 16 A 6      | 1661.9110 ** | 1644.8844 | 1643.9004    | 717.3633 ** | 700.3367  | 699.3527     | 831.4594 **  | 822.9461 ** | 359.1855     | 350.6723     | 350.1803  |
| 17 A 5      | 1732.9481 ** | 1715.9215 | 1714.9375    | 646.3262 ** | 629.2996  | 628.3156 **  | 866.9780 **  | 858.4647 ** | 323.6670     | 315.1537     | 314.6617  |
| 18 S 4      | 1819.9801    | 1802.9536 | 1801.9696    | 575.2891 ** | 558.2625  | 557.2785 **  | 910.4940 **  | 901.9807 ** | 0.0000       | 0.0000       | 0.0000    |
| 19 K 3      | 2004.0751    | 1987.0485 | 1986.0646    | 488.2570 ** | 471.2305  | 470.2465 **  | 1002.5414 ** | 994.0282 ** | 0.0000       | 0.0000       | 0.0000    |
| 20 E 2      | 2133.1177    | 2116.0911 | 2115.1072    | 304.1621 ** | 287.1356  | 286.1515 **  | 1067.0627 ** | 1058.5494   | 0.0000       | 0.0000       | 0.0000    |
| 21 R 1      | 2289.2188    | 2272.1921 | 2271.2083    | 175.1195    | 158.0930  | 157.1089     | 1145.1133    | 1136.6000   | 0.0000       | 0.0000       | 0.0000    |

pr-AVAASK<sub>pm</sub>

H1.2K54

K\_AVAASK(+70)E (+1) - Mod : 0.07 at 0(-1) - Retention time : 52.62 min - Precursor m/z : 672.39 - Precursor int. : 3563090.000 - Basepeak int. : 769741.000

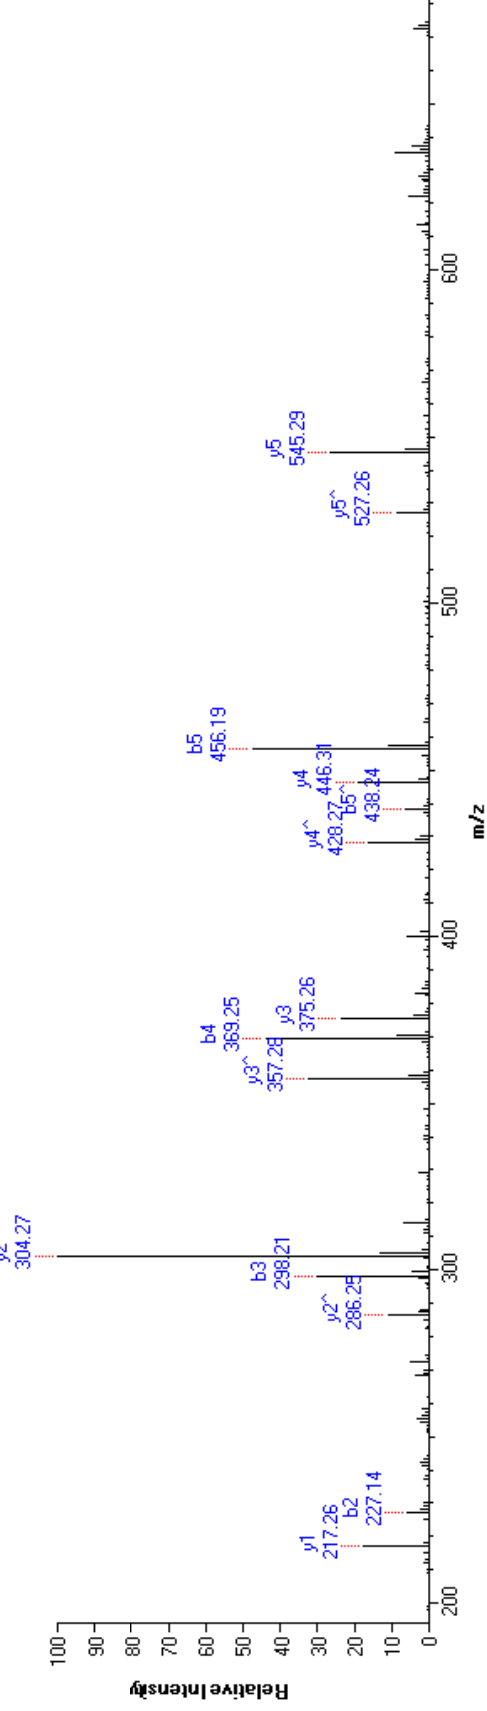

| [b] Seq [y] | b           | b <sup>+</sup> | b <sup>+</sup> | y           | y <sup>+</sup> | y <sup>+</sup> |
|-------------|-------------|----------------|----------------|-------------|----------------|----------------|
| 1 A 6       | 128.0449    | 111.0184       | 110.0344       | 616.3251    | 599.2986       | 598.3146       |
| 2 V 5       | 227.1133 ** | 210.0868       | 209.1028       | 545.2880 ** | 528.2615       | 527.2775 **    |
| 3 A 4       | 298.1505 ** | 281.1239       | 280.1399       | 446.2196 ** | 429.1931       | 428.2090 **    |
| 4 A 3       | 369.1876 ** | 352.1610       | 351.1770       | 375.1825 ** | 358.1559       | 357.1719 **    |
| 5 S 2       | 456.2196 ** | 439.1931       | 438.2090 **    | 304.1454 ** | 287.1188       | 286.1348 **    |
| 6 K 1       | 654.3146    | 637.2880       | 636.3040       | 217.1133 ** | 200.0868       | 199.1028       |

pr-SGVSLAALK<sub>pm</sub>

H1.2K65

R.SGVSLAALK(+70)K (+2) - Mod : 0.07 at 0(-1) - Retention time : 65.55 min - Precursor m/z : 486.29 - Precursor int. : 363846.000 - Basepeak int. : 107231.000

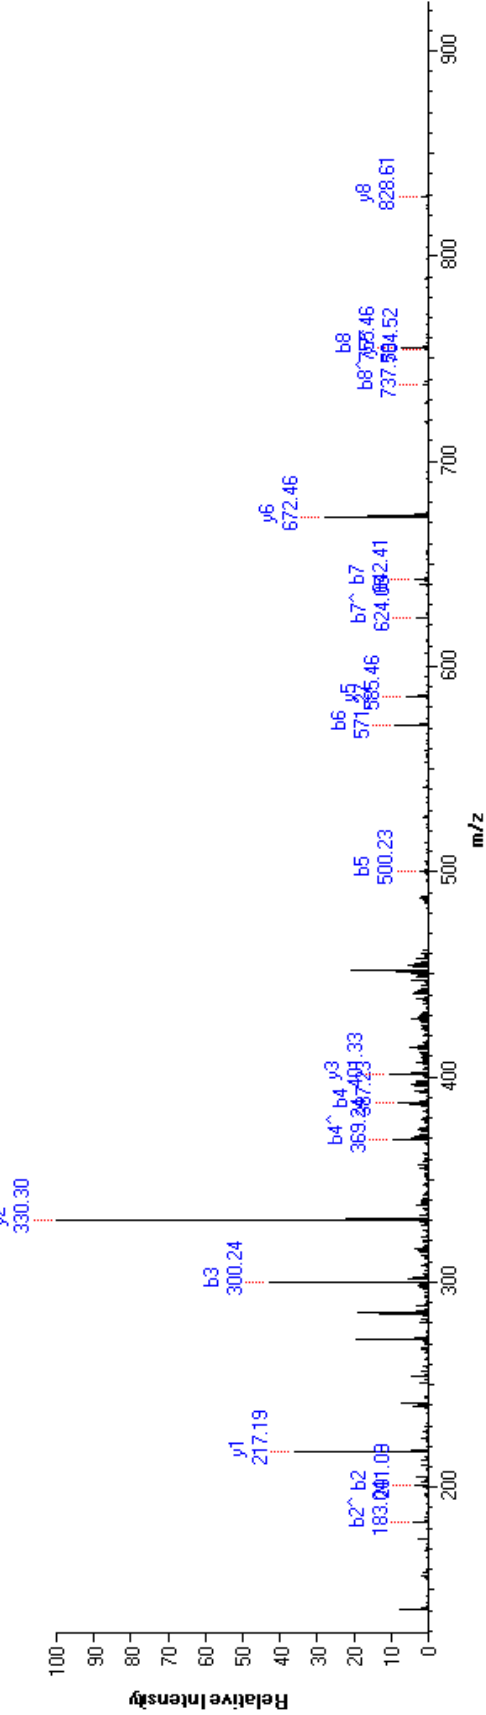

| [b] Seq [w] | b                      | b <sup>+</sup> | b <sup>-</sup>         | y                      | y <sup>+</sup>         | y <sup>-</sup> |
|-------------|------------------------|----------------|------------------------|------------------------|------------------------|----------------|
| 1 S 9       | 144.0399               | 127.0133       | 126.0293               | 915.5096               | 898.4831               | 897.4991       |
| 2 G 8       | 201.0613 <sup>**</sup> | 184.0348       | 183.0508 <sup>**</sup> | 828.4776 <sup>**</sup> | 811.4510               | 810.4670       |
| 3 V 7       | 300.1297 <sup>**</sup> | 283.1032       | 282.1192               | 771.4561               | 754.4296 <sup>**</sup> | 753.4456       |
| 4 S 6       | 387.1617 <sup>**</sup> | 370.1352       | 369.1512 <sup>**</sup> | 672.3877 <sup>**</sup> | 655.3611               | 654.3771       |
| 5 L 5       | 500.2458 <sup>**</sup> | 483.2193       | 482.2353               | 585.3557 <sup>**</sup> | 568.3292               | 567.3452       |
| 6 A 4       | 571.2829 <sup>**</sup> | 554.2564       | 553.2723               | 472.2716               | 455.2451               | 454.2611       |
| 7 A 3       | 642.3200 <sup>**</sup> | 625.2935       | 624.3094 <sup>**</sup> | 401.2345 <sup>**</sup> | 384.2080               | 383.2240       |
| 8 L 2       | 755.4041 <sup>**</sup> | 738.3776       | 737.3936 <sup>**</sup> | 330.1974 <sup>**</sup> | 313.1709               | 312.1869       |
| 9 K 1       | 953.4991               | 936.4725       | 935.4885               | 217.1133 <sup>**</sup> | 200.0868               | 199.1028       |



# SGVSLAALK<sub>f0</sub>K

H1.2K65

MS/MS Fragmentation of **SGVSLAALKK**  
Found in **gi|197692471**, histone H1.2 [Homo sapiens]

Match to Query 6919: 1000.589514 from(501.302033,2+)  
From data file HelaHistoneH1.dta

Click mouse within plot area to zoom in by factor of two about that point  
Or, Plot from  to  Da

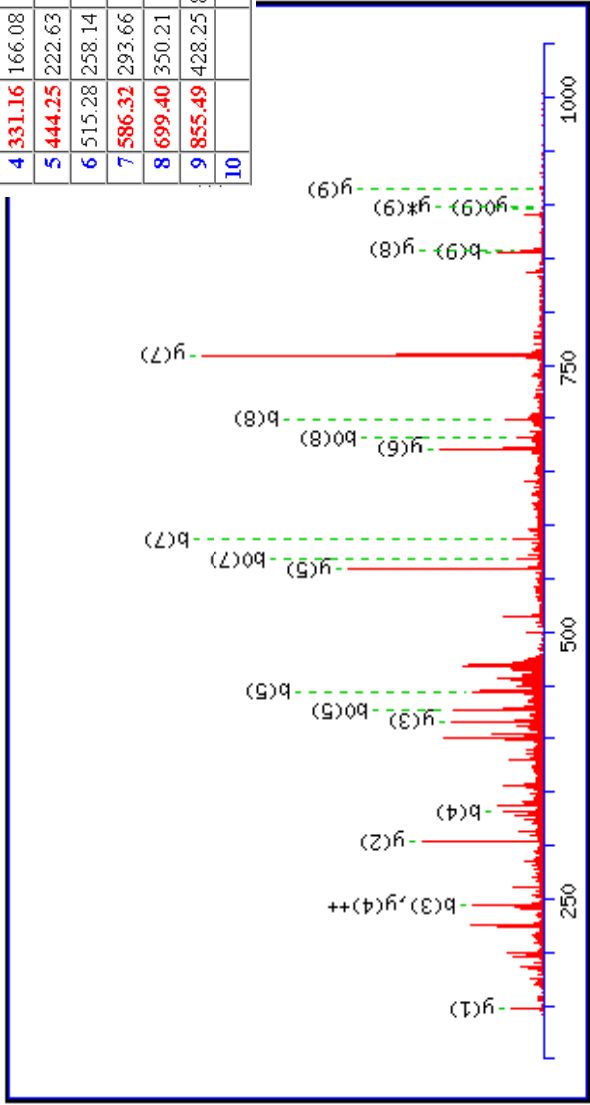

Monoisotopic mass of neutral peptide Mr(calc): 1000.59  
Variable modifications:  
K9 : Formyl (K)  
Ions Score: 39 Expect: 0.032  
Matches (**Bold Red**): 20/80 fragment ions using 46 most intense peaks

| #  | b      | b <sup>++</sup> | b <sup>*</sup> | b <sup>+++</sup> | b <sup>0</sup> | b <sup>0++</sup> | Seq. | y      | y <sup>++</sup> | y <sup>*</sup> | y <sup>+++</sup> | y <sup>0</sup> | y <sup>0++</sup> | #  |
|----|--------|-----------------|----------------|------------------|----------------|------------------|------|--------|-----------------|----------------|------------------|----------------|------------------|----|
| 1  | 88.04  | 44.52           |                |                  | 70.03          | 35.52            | S    |        |                 |                |                  |                |                  | 10 |
| 2  | 145.06 | 73.03           |                |                  | 127.05         | 64.03            | G    | 914.57 | 457.79          | 897.54         | 449.27           | 896.56         | 448.78           | 9  |
| 3  | 244.13 | 122.57          |                |                  | 226.12         | 113.56           | V    | 857.55 | 429.28          | 840.52         | 420.76           | 839.53         | 420.27           | 8  |
| 4  | 331.16 | 166.08          |                |                  | 313.15         | 157.08           | S    | 758.48 | 379.74          | 741.45         | 371.23           | 740.47         | 370.74           | 7  |
| 5  | 444.25 | 222.63          |                |                  | 426.23         | 213.62           | L    | 671.45 | 336.23          | 654.42         | 327.71           |                |                  | 6  |
| 6  | 515.28 | 258.14          |                |                  | 497.27         | 249.14           | A    | 558.36 | 279.68          | 541.33         | 271.17           |                |                  | 5  |
| 7  | 586.32 | 293.66          |                |                  | 568.31         | 284.66           | A    | 487.32 | 244.17          | 470.30         | 235.65           |                |                  | 4  |
| 8  | 699.40 | 350.21          |                |                  | 681.39         | 341.20           | L    | 416.29 | 208.65          | 399.26         | 200.13           |                |                  | 3  |
| 9  | 855.49 | 428.25          | 838.47         | 419.74           | 837.48         | 419.25           | K    | 303.20 | 152.10          | 286.18         | 143.59           |                |                  | 2  |
| 10 |        |                 |                |                  |                |                  | K    | 147.11 | 74.06           | 130.09         | 65.55            |                |                  | 1  |



**K<sub>f</sub>oALAAAGYDVEK**

**H1.1K66**

K.KALAAAGYDVEK.N (+2) - Mod : 28.00 at K(1) - Retention time : 56.10 min - Precursor m/z : 632.33 - Precursor int. : 1410630.000 - Basepeak int. : 111978.000

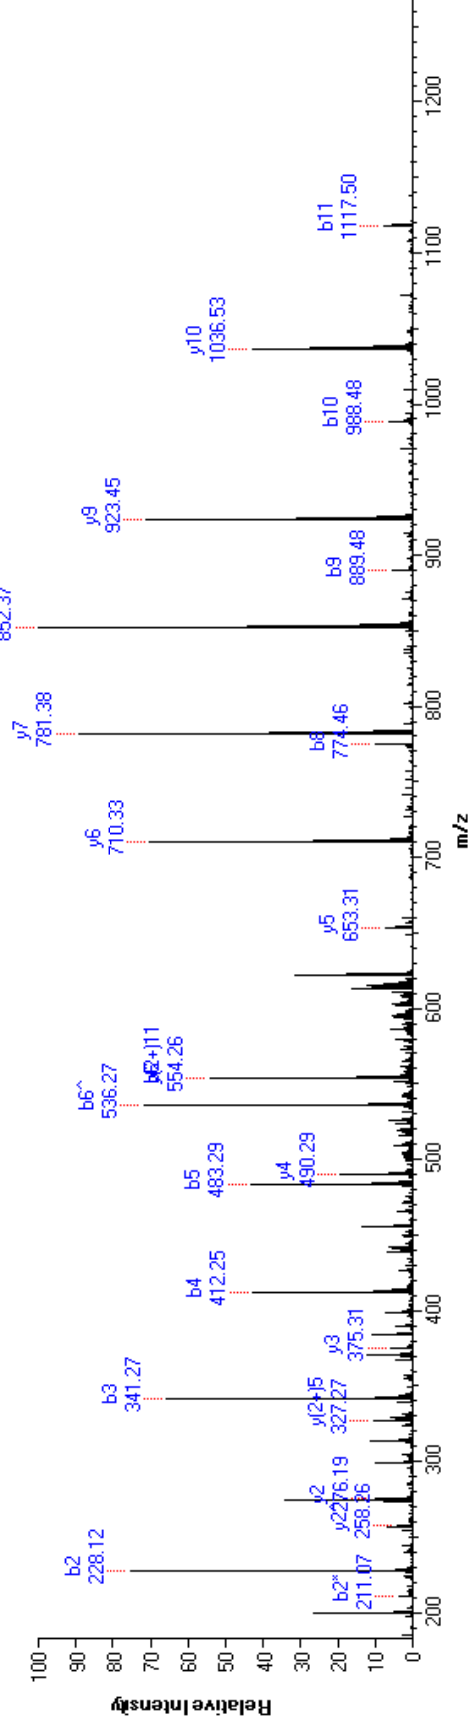

| (b) Seq (y) | b                        | b <sup>+</sup>          | b <sup>-</sup>         | y                        | y <sup>+</sup> | y <sup>-</sup>          | b(2+)    | b(2+) <sup>+</sup> | y(2+)                   | y(2+) <sup>+</sup> | y(2+) <sup>-</sup> |
|-------------|--------------------------|-------------------------|------------------------|--------------------------|----------------|-------------------------|----------|--------------------|-------------------------|--------------------|--------------------|
| 1 K 12      | 157.1028                 | 140.0762                | 139.0922               | 1263.6636                | 1246.6370      | 1245.6530               | 0.0000   | 0.0000             | 632.3357                | 623.8224           | 623.3304           |
| 2 A 11      | 228.1399 <sup>xx</sup>   | 211.1134 <sup>xxx</sup> | 210.1293               | 1107.5686                | 1090.5420      | 1089.5580               | 0.0000   | 0.0000             | 554.2882 <sup>xx</sup>  | 545.7749           | 545.2829           |
| 3 L 10      | 341.2240 <sup>xx</sup>   | 324.1974                | 323.2134               | 1036.5315 <sup>xxx</sup> | 1019.5049      | 1018.5209               | 0.0000   | 0.0000             | 518.7697                | 510.2564           | 509.7644           |
| 4 A 9       | 412.2611 <sup>xx</sup>   | 395.2345                | 394.2505               | 923.4474 <sup>xxx</sup>  | 906.4208       | 905.4368                | 0.0000   | 0.0000             | 462.2276                | 453.7144           | 453.2223           |
| 5 A 8       | 483.2982 <sup>xx</sup>   | 466.2716                | 465.2876               | 852.4103 <sup>xxx</sup>  | 835.3837       | 834.3997                | 0.0000   | 0.0000             | 426.7090                | 418.1958           | 417.7038           |
| 6 A 7       | 554.3353 <sup>xx</sup>   | 537.3087                | 536.3247 <sup>xx</sup> | 781.3732 <sup>xxx</sup>  | 764.3466       | 763.3626                | 0.0000   | 0.0000             | 391.1905                | 382.6772           | 382.1852           |
| 7 G 6       | 611.3568                 | 594.3302                | 593.3462               | 710.3361 <sup>xxx</sup>  | 693.3095       | 692.3255                | 0.0000   | 0.0000             | 355.6719                | 347.1587           | 346.6667           |
| 8 Y 5       | 774.4201 <sup>xxx</sup>  | 757.3936                | 756.4095               | 653.3146 <sup>xxx</sup>  | 636.2881       | 635.3041                | 387.7140 | 379.2007           | 327.1612 <sup>xxx</sup> | 318.6479           | 318.1559           |
| 9 D 4       | 889.4470 <sup>xxx</sup>  | 872.4205                | 871.4365               | 490.2513 <sup>xxx</sup>  | 473.2247       | 472.2407                | 445.2274 | 436.7141           | 0.0000                  | 0.0000             | 0.0000             |
| 10 V 3      | 988.5154 <sup>xxx</sup>  | 971.4889                | 970.5049               | 375.2243 <sup>xxx</sup>  | 358.1978       | 357.2138                | 494.7616 | 486.2484           | 0.0000                  | 0.0000             | 0.0000             |
| 11 E 2      | 1117.5580 <sup>xxx</sup> | 1100.5315               | 1099.5475              | 276.1559 <sup>xxx</sup>  | 259.1294       | 258.1454 <sup>xxx</sup> | 559.2829 | 550.7697           | 0.0000                  | 0.0000             | 0.0000             |
| 12 K 1      | 1245.6530                | 1228.6265               | 1227.6425              | 147.1133                 | 130.0868       | 129.1028                | 623.3304 | 614.8171           | 0.0000                  | 0.0000             | 0.0000             |

ALAAAGY<sub>oh</sub>DVEK

H1.2Y73

K.ALAAAGYDVEK.N (+2) · Mod : 16.00 at Y(7) · Retention time : 53.76 min · Precursor m/z : 562.29 · Precursor int. : 591345.000 · Basepeak int. : 163719.000

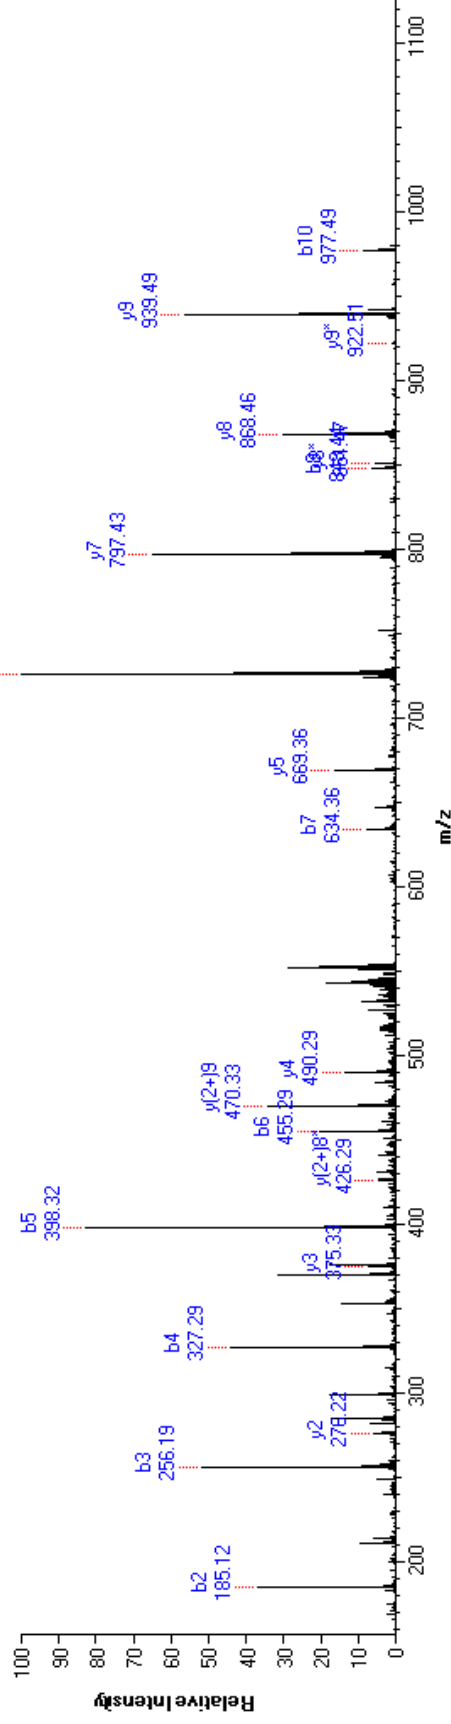

| (b) Seq (y) | b           | b <sup>+</sup> | b <sup>-</sup> | y           | y <sup>+</sup> | y <sup>-</sup> | b(2+) <sup>+</sup> | b(2+) <sup>-</sup> | y(2+) <sup>+</sup> | y(2+) <sup>-</sup> |
|-------------|-------------|----------------|----------------|-------------|----------------|----------------|--------------------|--------------------|--------------------|--------------------|
| 1 A 11      | 72.0449     | 55.0184        | 54.0344        | 1123.5686   | 1106.5420      | 1105.5580      | 0.0000             | 0.0000             | 562.2882           | 553.7749           |
| 2 L 10      | 185.1290 ** | 168.1024       | 167.1184       | 1052.5315   | 1035.5049      | 1034.5209      | 0.0000             | 0.0000             | 526.7697           | 518.2563           |
| 3 A 9       | 256.1661 ** | 239.1396       | 238.1556       | 939.4474 ** | 922.4208 **    | 921.4368       | 0.0000             | 0.0000             | 470.2276 **        | 461.7144           |
| 4 A 8       | 327.2032 ** | 310.1767       | 309.1927       | 868.4103 ** | 851.3837 **    | 850.3997       | 0.0000             | 0.0000             | 434.7090           | 426.1958 **        |
| 5 A 7       | 398.2403 ** | 381.2138       | 380.2298       | 797.3732 ** | 780.3466       | 779.3626       | 0.0000             | 0.0000             | 399.1905           | 390.6772           |
| 6 G 6       | 455.2618 ** | 438.2352       | 437.2512       | 726.3361 ** | 709.3095       | 708.3255       | 0.0000             | 0.0000             | 363.6719           | 355.1587           |
| 7 Y 5       | 634.3251 ** | 617.2986       | 616.3146       | 669.3146 ** | 652.2881       | 651.3041       | 0.0000             | 0.0000             | 335.1612           | 326.6479           |
| 8 D 4       | 749.3521    | 732.3255       | 731.3415       | 490.2513 ** | 473.2247       | 472.2407       | 0.0000             | 0.0000             | 0.0000             | 0.0000             |
| 9 V 3       | 848.4205 ** | 831.3939       | 830.4099       | 375.2243 ** | 358.1978       | 357.2138       | 0.0000             | 0.0000             | 0.0000             | 0.0000             |
| 10 E 2      | 977.4631 ** | 960.4365       | 959.4525       | 276.1559 ** | 259.1294       | 258.1454       | 0.0000             | 0.0000             | 0.0000             | 0.0000             |
| 11 K 1      | 1105.5580   | 1088.5315      | 1087.5475      | 147.1133    | 130.0868       | 129.1028       | 553.2829           | 544.7697           | 0.0000             | 0.0000             |

ALAAAGY<sub>oh</sub>DVEK

H1.1Y73

MS/MS Fragmentation of **KALAAAGYDVEK**  
Found in **gi|197692471**, histone H1.2 [Homo sapiens]

Match to Query 13812: 1250.648714 from(626.331633,2+)  
From data file HelaHistoneH1.dta

Click mouse within plot area to zoom in by factor of two about that point  
Or, Plot from  to  Da

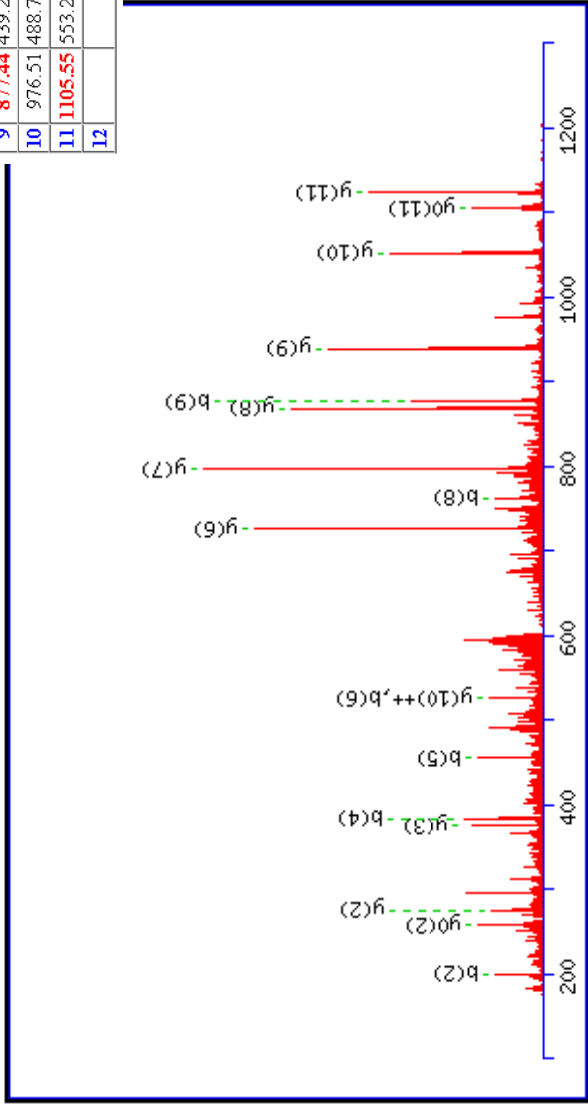

| #  | b              | b <sup>++</sup> | b <sup>*</sup> | b <sup>+++</sup> | b <sup>0</sup> | b <sup>0++</sup> | Seq. | y              | y <sup>++</sup> | y <sup>*</sup> | y <sup>+++</sup> | y <sup>0</sup> | y <sup>0++</sup> | #  |
|----|----------------|-----------------|----------------|------------------|----------------|------------------|------|----------------|-----------------|----------------|------------------|----------------|------------------|----|
| 1  | 129.10         | 65.05           | 112.08         | 56.54            |                |                  | K    |                |                 |                |                  |                |                  | 12 |
| 2  | <b>200.14</b>  | 100.57          | 183.11         | 92.06            |                |                  | A    | <b>1123.56</b> | 562.29          | 1106.54        | 553.77           | <b>1105.55</b> |                  | 11 |
| 3  | 313.22         | 157.12          | 296.20         | 148.60           |                |                  | L    | <b>1052.53</b> | <b>526.77</b>   | 1035.50        | 518.25           | 1034.52        | 517.76           | 10 |
| 4  | <b>384.26</b>  | 192.63          | 367.23         | 184.12           |                |                  | A    | <b>939.44</b>  | 470.22          | 922.42         | 461.71           | 921.43         | 461.22           | 9  |
| 5  | <b>455.30</b>  | 228.15          | 438.27         | 219.64           |                |                  | A    | <b>868.40</b>  | 434.71          | 851.38         | 426.19           | 850.39         | 425.70           | 8  |
| 6  | <b>526.33</b>  | 263.67          | 509.31         | 255.16           |                |                  | A    | <b>797.37</b>  | 399.19          | 780.34         | 390.67           | 779.36         | 390.18           | 7  |
| 7  | 583.36         | 292.18          | 566.33         | 283.67           |                |                  | G    | <b>726.33</b>  | 363.67          | 709.30         | 355.16           | 708.32         | 354.66           | 6  |
| 8  | <b>762.41</b>  | 381.71          | 745.39         | 373.20           |                |                  | Y    | 669.31         | 335.16          | 652.28         | 326.64           | 651.30         | 326.15           | 5  |
| 9  | <b>877.44</b>  | 439.22          | 860.41         | 430.71           | 859.43         | 430.22           | D    | 490.25         | 245.63          | 473.22         | 237.12           | 472.24         | 236.62           | 4  |
| 10 | 976.51         | 488.76          | 959.48         | 480.25           | 958.50         | 479.75           | V    | <b>375.22</b>  | 188.12          | 358.20         | 179.60           | 357.21         | 179.11           | 3  |
| 11 | <b>1105.55</b> | 553.28          | 1088.53        | 544.77           | 1087.54        | 544.27           | E    | <b>276.16</b>  | 138.58          | 259.13         | 130.07           | <b>258.14</b>  | 129.58           | 2  |
| 12 |                |                 |                |                  |                |                  | K    | 147.11         | 74.06           | 130.09         | 65.55            |                |                  | 1  |

Monoisotopic mass of neutral peptide Mr(calc): 1250.65  
Variable modifications:  
Y8 : Hydroxylation (Y)  
Ions Score: 51 Expect: 0.0026  
Matches (**Bold Red**): 18/114 fragment ions using 47 most intense peaks

IK<sub>f0</sub>LGLK

H1.1K83

R.I.K.L.G.L.K.S (+2) - Mod : 28.00 at K(2) - Retention time : 34.97 min - Precursor m/z : 350.24 - Basepeak int. : 552709.000

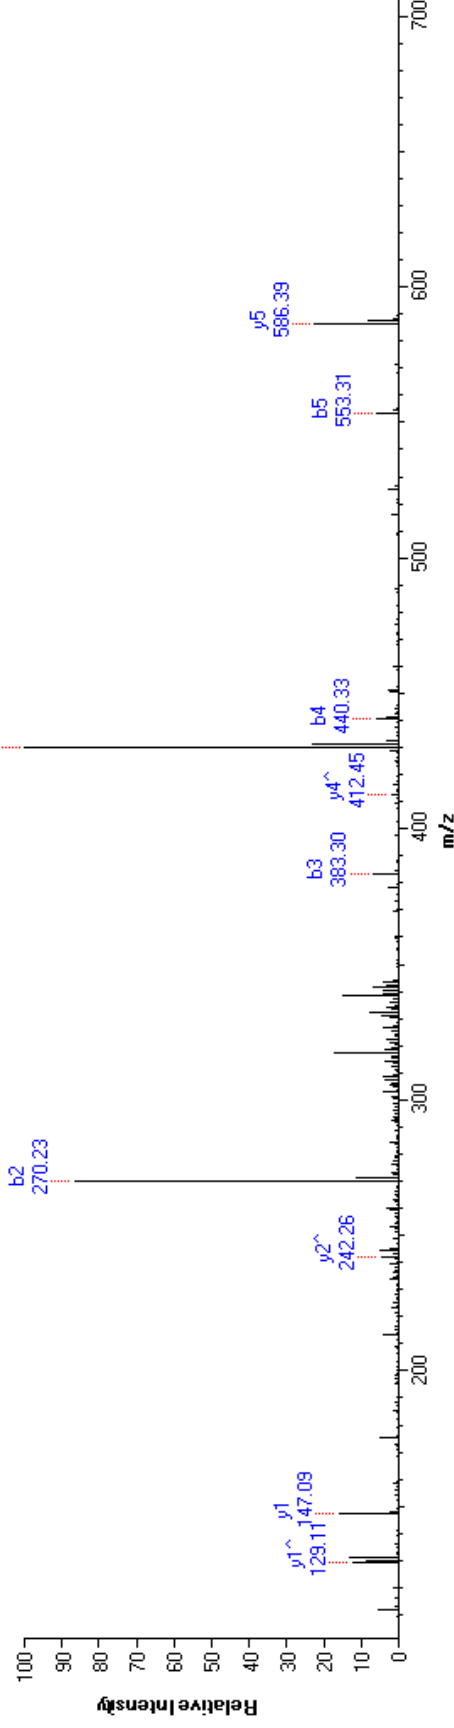

| (b) Seq (y) | b           | b^       | b^       | y           | y^       | y^          | y^       | b(2+)    | b(2+)^   | y(2+)    | y(2+)^   | y(2+)^   |
|-------------|-------------|----------|----------|-------------|----------|-------------|----------|----------|----------|----------|----------|----------|
| 1 1 6       | 114.0919    | 97.0653  | 96.0813  | 699.4819    | 682.4554 | 681.4714    | 0.0000   | 0.0000   | 0.0000   | 350.2449 | 341.7316 | 341.2396 |
| 2 K 5       | 270.1869 ** | 253.1603 | 252.1763 | 586.3979 ** | 569.3713 | 568.3873    | 0.0000   | 0.0000   | 0.0000   | 0.0000   | 0.0000   | 0.0000   |
| 3 L 4       | 383.2709 ** | 366.2444 | 365.2603 | 430.3029 ** | 413.2764 | 412.2924 ** | 0.0000   | 0.0000   | 0.0000   | 0.0000   | 0.0000   | 0.0000   |
| 4 G 3       | 440.2924 ** | 423.2658 | 422.2818 | 317.2189    | 300.1923 | 299.2083    | 0.0000   | 0.0000   | 0.0000   | 0.0000   | 0.0000   | 0.0000   |
| 5 L 2       | 553.3764 ** | 536.3499 | 535.3658 | 260.1974    | 243.1709 | 242.1868 ** | 0.0000   | 0.0000   | 0.0000   | 0.0000   | 0.0000   | 0.0000   |
| 6 K 1       | 681.4714    | 664.4448 | 663.4608 | 147.1133 ** | 130.0868 | 129.1028 ** | 341.2396 | 332.7263 | 332.2343 | 0.0000   | 0.0000   | 0.0000   |

IKLGLK<sub>f0</sub>SLVSK

H1.1K87

MS/MS Fragmentation of **IKLGLKSLVSK**  
Found in **gi|197692471**, histone H1.2 [Homo sapiens]

Match to Query 12361: 1212.779712 from(405.267180,3+)  
From data file HelaHistoneH1.dta

Click mouse within plot area to zoom in by factor of two about that point  
Or, Plot from  to  Da

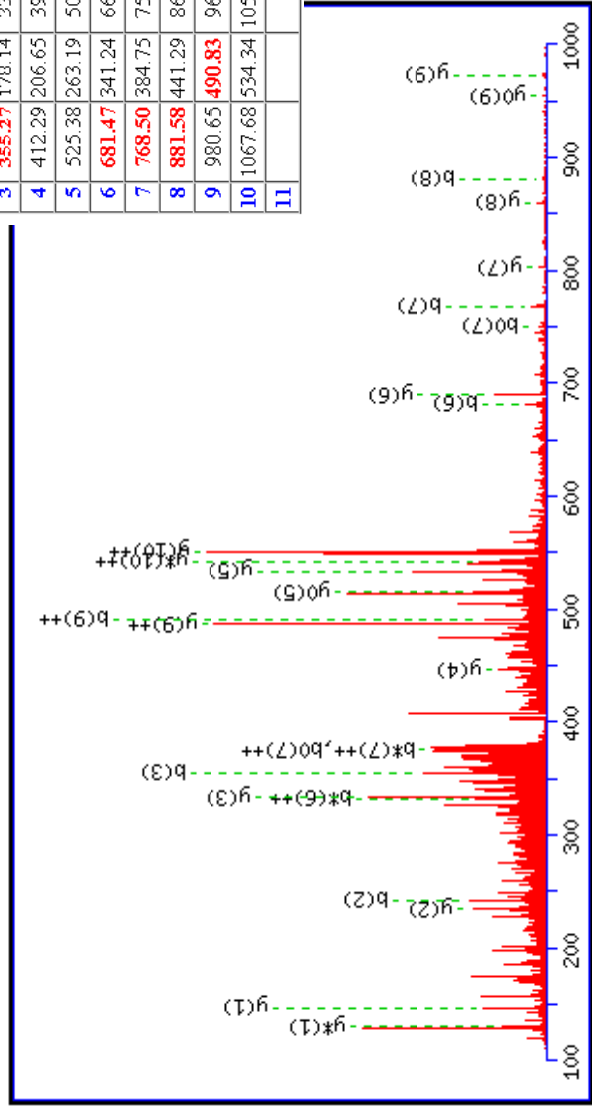

Monoisotopic mass of neutral peptide Mr(calc): 1212.78

Variable modifications:

K6 : Formyl (K)

Ions Score: 34 Expect: 0.15

Matches (**Bold Red**): 25/104 fragment ions using 92 most intense peaks

| #  | b       | b <sup>++</sup> | b <sup>+</sup> | b <sup>++</sup> | b <sup>0</sup> | b <sup>0++</sup> | Seq. | y       | y <sup>++</sup> | y <sup>+</sup> | y <sup>++</sup> | y <sup>0</sup> | y <sup>0++</sup> | #  |
|----|---------|-----------------|----------------|-----------------|----------------|------------------|------|---------|-----------------|----------------|-----------------|----------------|------------------|----|
| 1  | 114.09  | 57.55           |                |                 |                |                  | I    |         |                 |                |                 |                |                  | 11 |
| 2  | 242.19  | 121.60          | 225.16         | 113.08          |                |                  | K    | 1100.70 | 550.86          | 542.34         | 1083.68         | 1082.69        | 541.85           | 10 |
| 3  | 355.27  | 178.14          | 338.24         | 169.63          |                |                  | L    | 972.61  | 486.81          | 955.58         | 478.29          | 954.60         | 477.80           | 9  |
| 4  | 412.29  | 206.65          | 395.27         | 198.14          |                |                  | G    | 859.52  | 430.27          | 842.50         | 421.75          | 841.51         | 421.26           | 8  |
| 5  | 525.38  | 263.19          | 508.35         | 254.68          |                |                  | L    | 802.50  | 401.76          | 785.48         | 393.24          | 784.49         | 392.75           | 7  |
| 6  | 681.47  | 341.24          | 664.44         | 332.72          |                |                  | K    | 689.42  | 345.21          | 672.39         | 336.70          | 671.41         | 336.21           | 6  |
| 7  | 768.50  | 384.75          | 751.47         | 376.24          | 750.49         | 375.75           | S    | 533.33  | 267.17          | 516.30         | 258.66          | 515.32         | 258.16           | 5  |
| 8  | 881.58  | 441.29          | 864.56         | 432.78          | 863.57         | 432.29           | L    | 446.30  | 223.65          | 429.27         | 215.14          | 428.29         | 214.65           | 4  |
| 9  | 980.65  | 490.83          | 963.62         | 482.32          | 962.64         | 481.82           | V    | 333.21  | 167.11          | 316.19         | 158.60          | 315.20         | 158.10           | 3  |
| 10 | 1067.68 | 534.34          | 1050.66        | 525.83          | 1049.67        | 525.34           | S    | 234.14  | 117.58          | 217.12         | 109.06          | 216.13         | 108.57           | 2  |
| 11 |         |                 |                |                 |                |                  | K    | 147.11  | 74.06           | 130.09         | 65.55           |                |                  | 1  |

IK<sub>pm</sub>LGLK<sub>ac</sub>SLVSK<sub>pr</sub>GTLVQTKH1.5K83, K87

MS/MS Fragmentation of **IKLGLKSLVSKGTLVQTK**

Found in **gj4885381**, histone H1.5 [Homo sapiens]

Match to Query 24900: 2080.288293 from(694.436707,3+)

From data file D:\MinjiaTan\DTAconversion\DTAs\HelaHistone\_PrBeforeTrp\_2.dta

Click mouse within plot area to zoom in by factor of two about that point

Or, Plot from  to  Da

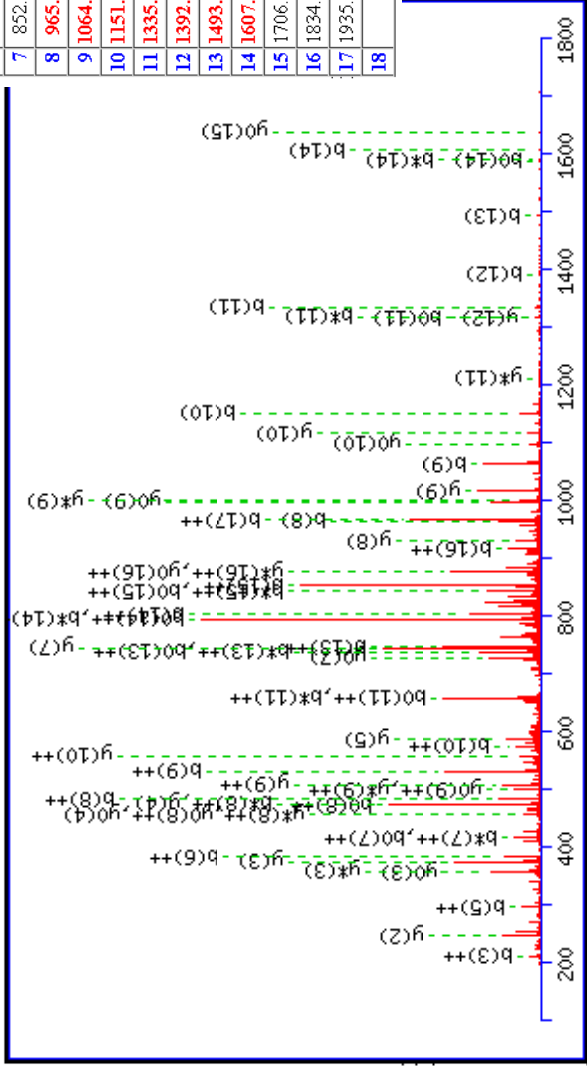

| #  | b              | b <sup>++</sup> | b <sup>+</sup> | b <sup>++</sup> | b <sup>0</sup> | b <sup>0++</sup> | Seq. | y              | y <sup>++</sup> | y <sup>+</sup> | y <sup>++</sup> | y <sup>0</sup> | y <sup>0++</sup> | #  |
|----|----------------|-----------------|----------------|-----------------|----------------|------------------|------|----------------|-----------------|----------------|-----------------|----------------|------------------|----|
| 1  | 114.09         | 57.55           |                |                 |                |                  | I    |                |                 |                |                 |                |                  | 18 |
| 2  | 312.23         | 156.62          | 295.20         | 148.10          |                |                  | K    | 1968.21        | 984.61          | 1951.18        | 976.10          | 1950.20        | 975.60           | 17 |
| 3  | 425.31         | <b>213.16</b>   | 408.29         | 204.65          |                |                  | L    | 1770.07        | 885.54          | 1753.05        | <b>877.03</b>   | 1752.06        | <b>876.54</b>    | 16 |
| 4  | 482.33         | 241.67          | 465.31         | 233.16          |                |                  | G    | 1656.99        | 829.00          | 1639.96        | 820.49          | <b>1638.98</b> | 819.99           | 15 |
| 5  | 595.42         | <b>298.21</b>   | 578.39         | 289.70          |                |                  | L    | 1599.97        | 800.49          | 1582.94        | 791.97          | 1581.96        | 791.48           | 14 |
| 6  | 765.52         | <b>383.27</b>   | 748.50         | 374.75          |                |                  | K    | 1486.88        | 743.95          | 1469.86        | 735.43          | 1468.87        | 734.94           | 13 |
| 7  | 852.56         | 426.78          | 835.53         | <b>418.27</b>   | 834.54         | <b>417.78</b>    | S    | <b>1316.78</b> | 658.89          | 1299.75        | 650.38          | 1298.77        | 649.89           | 12 |
| 8  | <b>965.64</b>  | <b>483.32</b>   | 948.61         | <b>474.81</b>   | 947.63         | <b>474.32</b>    | L    | 1229.75        | 615.38          | <b>1212.72</b> | 606.86          | 1211.74        | 606.37           | 11 |
| 9  | <b>1064.71</b> | <b>532.86</b>   | 1047.68        | 524.34          | 1046.70        | 523.85           | V    | <b>1116.66</b> | <b>558.83</b>   | 1099.64        | 550.32          | <b>1098.65</b> | 549.83           | 10 |
| 10 | <b>1151.74</b> | <b>576.37</b>   | 1134.71        | 567.86          | 1133.73        | 567.37           | S    | <b>1017.59</b> | <b>509.30</b>   | <b>1000.57</b> | <b>500.79</b>   | <b>999.58</b>  | <b>500.30</b>    | 9  |
| 11 | <b>1335.86</b> | 668.43          | <b>1318.83</b> | <b>659.92</b>   | <b>1317.85</b> | <b>659.43</b>    | K    | <b>930.56</b>  | 465.78          | 913.54         | <b>457.27</b>   | 912.55         | <b>456.78</b>    | 8  |
| 12 | <b>1392.88</b> | 696.94          | 1375.86        | 688.43          | 1374.87        | 687.94           | G    | <b>746.44</b>  | 373.72          | 729.41         | 365.21          | <b>738.43</b>  | 364.72           | 7  |
| 13 | <b>1493.93</b> | <b>747.47</b>   | 1476.90        | <b>738.96</b>   | 1475.92        | <b>738.46</b>    | T    | 689.42         | 345.21          | 672.39         | 336.70          | 671.41         | 336.21           | 6  |
| 14 | <b>1607.01</b> | <b>804.01</b>   | <b>1589.99</b> | <b>795.50</b>   | <b>1589.00</b> | <b>795.01</b>    | L    | <b>588.37</b>  | 294.69          | 571.34         | 286.18          | 570.36         | 285.68           | 5  |
| 15 | 1706.08        | <b>853.54</b>   | 1689.06        | <b>845.03</b>   | 1688.07        | <b>844.54</b>    | V    | <b>475.29</b>  | 238.15          | 458.26         | 229.63          | <b>457.28</b>  | 229.14           | 4  |
| 16 | 1834.14        | <b>917.57</b>   | 1817.11        | 909.06          | 1816.13        | 908.57           | Q    | <b>376.22</b>  | 188.61          | <b>359.19</b>  | 180.10          | <b>358.21</b>  | 179.61           | 3  |
| 17 | 1935.19        | <b>968.10</b>   | 1918.16        | 959.58          | 1917.18        | 959.09           | T    | <b>248.16</b>  | 124.58          | 231.13         | 116.07          | 230.15         | 115.58           | 2  |
| 18 |                |                 |                |                 |                |                  | K    | 147.11         | 74.06           | 130.09         | 65.55           |                |                  | 1  |

Monoisotopic mass of neutral peptide Mr(calc): 2080.29

Variable modifications:

K2 : PropionylMethyl (K)

K6 : Acetyl (K)

K11 : Propionyl (K)

Ions Score: 54 Expect: 0.0032

Matches (**Bold Red**): 60/188 fragment ions using 100 most intense peaks

pr-SLVSK<sub>pm</sub>

H1.1K92

K.SLVSK.G (+1) - Mod : 70.00 at K(5) - Retention time : 57.36 min - Precursor m/z : 659.40 - Precursor int. : 2315200.000 - Basepeak int. : 1498650.000

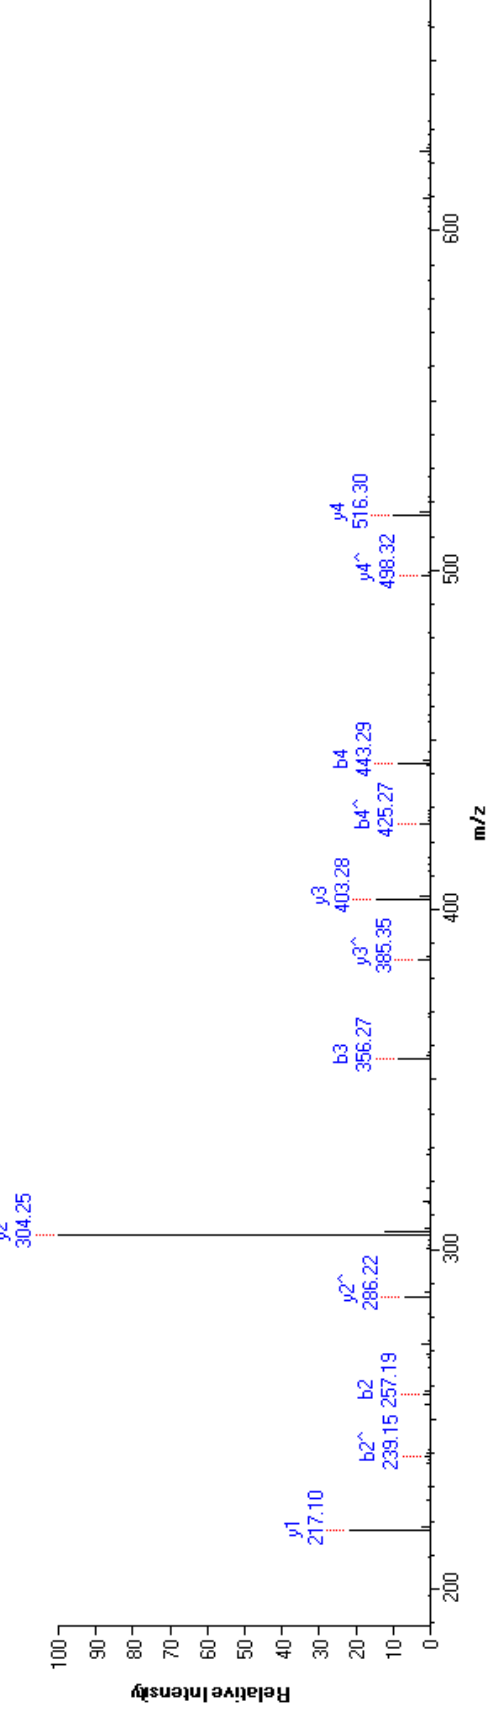

| [b] Seq [y] | b           | b <sup>°</sup> | b <sup>••</sup> | y           | y <sup>°</sup> | y <sup>••</sup> |
|-------------|-------------|----------------|-----------------|-------------|----------------|-----------------|
| 1 S 5       | 144.0399    | 127.0133       | 126.0293        | 603.3299    | 586.3033       | 585.3193        |
| 2 L 4       | 257.1239 ** | 240.0974       | 239.1134 **     | 516.2979 ** | 499.2713       | 498.2873 **     |
| 3 V 3       | 356.1923 ** | 339.1658       | 338.1818        | 403.2138 ** | 386.1873       | 385.2032 **     |
| 4 S 2       | 443.2244 ** | 426.1978       | 425.2138 **     | 304.1454 ** | 287.1188       | 286.1348 **     |
| 5 K 1       | 641.3193    | 624.2928       | 623.3088        | 217.1133 ** | 200.0868       | 199.1028        |
|             | (null)      | (null)         | (null)          | (null)      | (null)         | (null)          |

pr-SLVSK<sub>f0</sub>GTLVQTK

H1.1K92

K.SLVSKGTLVQTK.G (+2) - Mod : 28.00 at K(5) - Retention time : 36.49 min - Precursor m/z : 644.88 - Precursor int. : 2219130.000 - Basepeak int. : 219961.000

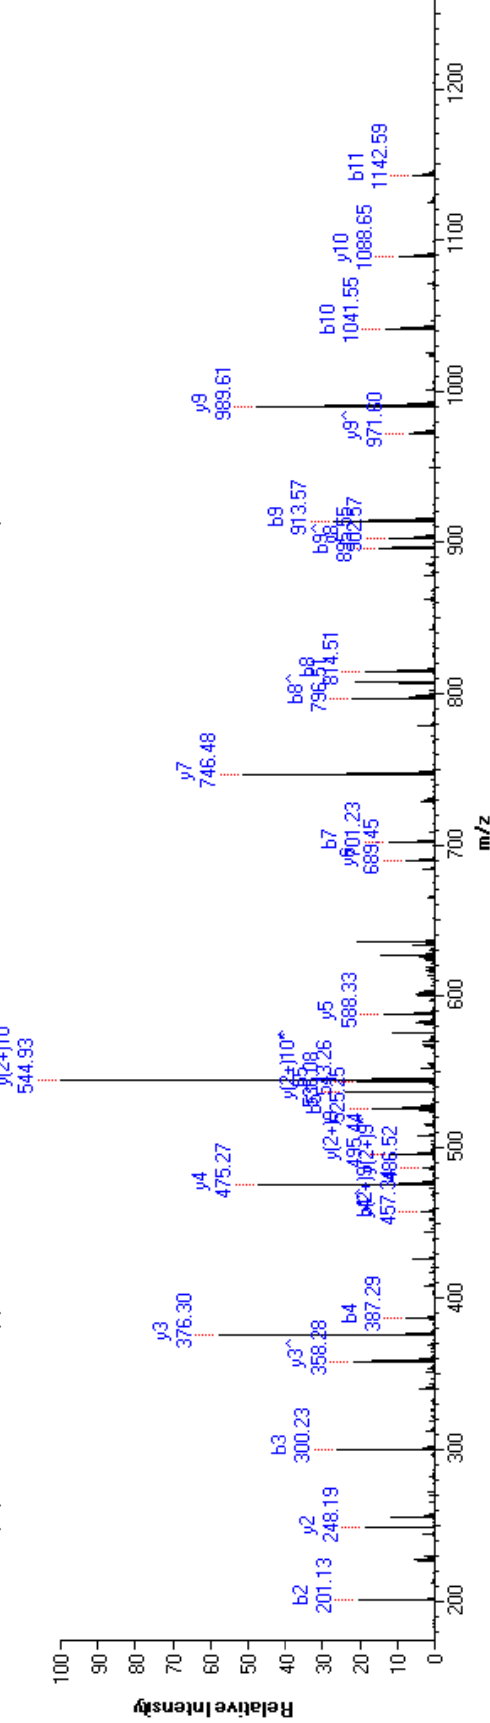

| [b] Seq [y] | b            | b <sup>+</sup> | b <sup>-</sup> | y            | y <sup>+</sup> | y <sup>-</sup> | b(2+)       | b(2+) <sup>+</sup> | b(2+) <sup>-</sup> | y(2+)       | y(2+) <sup>+</sup> | y(2+) <sup>-</sup> |
|-------------|--------------|----------------|----------------|--------------|----------------|----------------|-------------|--------------------|--------------------|-------------|--------------------|--------------------|
| 1 S 12      | 88.0399      | 71.0133        | 70.0293        | 1288.7527    | 1271.7262      | 1270.7422      | 0.0000      | 0.0000             | 0.0000             | 644.8802    | 636.3670           | 635.8750           |
| 2 L 11      | 201.1239 **  | 184.0974       | 183.1134       | 1201.7207    | 1184.6941      | 1183.7101      | 0.0000      | 0.0000             | 0.0000             | 601.3643    | 592.8510           | 592.3589           |
| 3 V 10      | 300.1923 **  | 283.1658       | 282.1818       | 1088.6366 ** | 1071.6101      | 1070.6261      | 0.0000      | 0.0000             | 0.0000             | 544.8222 ** | 536.3090 **        | 535.8170 **        |
| 4 S 9       | 387.2244 **  | 370.1978       | 369.2138       | 989.5682 **  | 972.5417       | 971.5576 **    | 0.0000      | 0.0000             | 0.0000             | 495.2880 ** | 486.7747 **        | 486.2827 **        |
| 5 K 8       | 543.3193 **  | 526.2928       | 525.3088 **    | 902.5362 **  | 885.5096       | 884.5256       | 0.0000      | 0.0000             | 0.0000             | 451.7720    | 443.2587           | 442.7667           |
| 6 G 7       | 600.3408     | 583.3142       | 582.3302       | 746.4412 **  | 729.4147       | 728.4307       | 0.0000      | 0.0000             | 0.0000             | 373.7245    | 365.2112           | 364.7192           |
| 7 T 6       | 701.3884 **  | 684.3619       | 683.3779       | 689.4197 **  | 672.3932       | 671.4092       | 351.1982    | 342.6849           | 342.1929           | 345.2138    | 336.7005           | 336.2085           |
| 8 L 5       | 814.4725 **  | 797.4460       | 796.4620 **    | 588.3721 **  | 571.3455       | 570.3615       | 407.7402    | 399.2269           | 398.7349           | 0.0000      | 0.0000             | 0.0000             |
| 9 V 4       | 913.5410 **  | 896.5144       | 895.5303 **    | 475.2880 **  | 458.2615       | 457.2775 **    | 457.2744 ** | 448.7611           | 448.2691           | 0.0000      | 0.0000             | 0.0000             |
| 10 Q 3      | 1041.5995 ** | 1024.5730      | 1023.5889      | 376.2196 **  | 359.1931       | 358.2090 **    | 521.3036    | 512.7904           | 512.2984           | 0.0000      | 0.0000             | 0.0000             |
| 11 T 2      | 1142.6472 ** | 1125.6206      | 1124.6366      | 248.1610 **  | 231.1345       | 230.1505       | 571.8275    | 563.3142           | 562.8222           | 0.0000      | 0.0000             | 0.0000             |
| 12 K 1      | 1270.7422    | 1253.7156      | 1252.7316      | 147.1133     | 130.0868       | 129.1028       | 635.8750    | 627.3617           | 626.8697           | 0.0000      | 0.0000             | 0.0000             |

SLVSK<sub>ac</sub>GTLVQTK

H1.1K92

MS/MS Fragmentation of **SLVSKGTLVQTK**

Found in **gi|197692471**, histone H1.2 [Homo sapiens]

Match to Query 19779: 1301.750404 from(651.882478,2+)

From data file D:\Lee\Histone\_nonpro\_Feb2010\DTAs\Non-prop\histoneoffgel\oprFr11\_12.dta

Click mouse within plot area to zoom in by factor of two about that point

Or, Plot from  to  Da

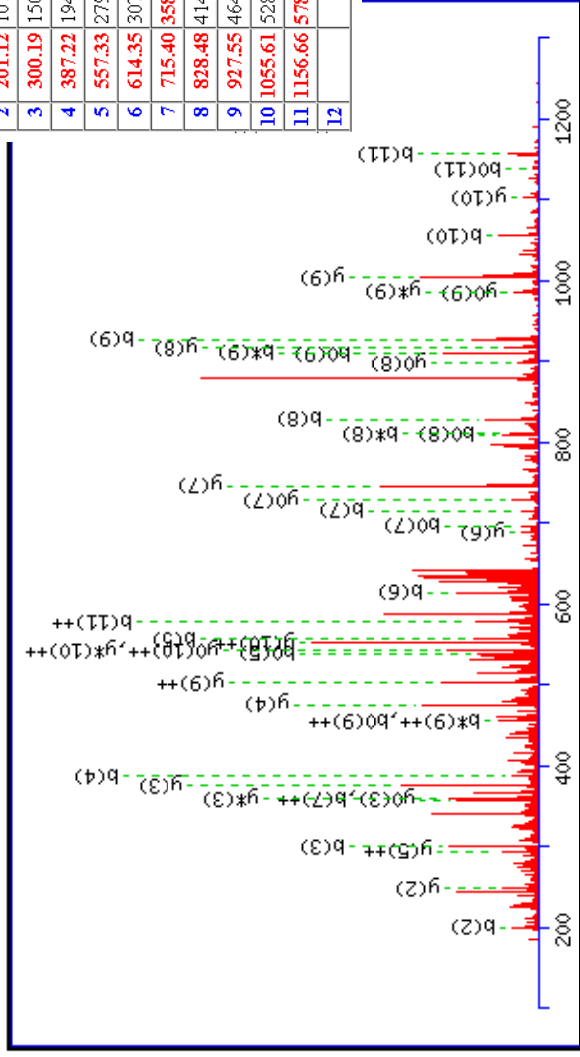

| #  | b       | b <sup>++</sup> | b <sup>+</sup> | b <sup>++</sup> | b <sup>0</sup> | b <sup>0++</sup> | Seq. | y       | y <sup>++</sup> | y <sup>+</sup> | y <sup>++</sup> | y <sup>0</sup> | y <sup>0++</sup> | #  |
|----|---------|-----------------|----------------|-----------------|----------------|------------------|------|---------|-----------------|----------------|-----------------|----------------|------------------|----|
| 1  | 88.04   | 44.52           |                |                 | 70.03          | 35.52            | S    |         |                 |                |                 |                |                  | 12 |
| 2  | 201.12  | 101.07          |                |                 | 183.11         | 92.06            | L    | 1215.73 | 608.37          | 1198.70        | 599.86          | 1197.72        | 599.36           | 11 |
| 3  | 300.19  | 150.60          |                |                 | 282.18         | 141.59           | V    | 1102.65 | 551.83          | 1085.62        | 543.31          | 1084.64        | 542.82           | 10 |
| 4  | 387.22  | 194.12          |                |                 | 369.21         | 185.11           | S    | 1003.58 | 502.29          | 986.55         | 493.78          | 985.57         | 493.29           | 9  |
| 5  | 557.33  | 279.17          | 540.30         | 270.66          | 539.32         | 270.16           | K    | 916.55  | 458.78          | 899.52         | 450.26          | 898.54         | 449.77           | 8  |
| 6  | 614.35  | 307.68          | 597.32         | 299.17          | 596.34         | 298.67           | G    | 746.44  | 373.72          | 729.41         | 365.21          | 728.43         | 364.72           | 7  |
| 7  | 715.40  | 358.20          | 698.37         | 349.69          | 697.39         | 349.20           | T    | 689.42  | 345.21          | 672.39         | 336.70          | 671.41         | 336.21           | 6  |
| 8  | 828.48  | 414.74          | 811.46         | 406.23          | 810.47         | 405.74           | L    | 588.37  | 294.69          | 571.34         | 286.18          | 570.36         | 285.68           | 5  |
| 9  | 927.55  | 464.28          | 910.52         | 455.77          | 909.54         | 455.27           | V    | 475.29  | 238.15          | 458.26         | 229.63          | 457.28         | 229.14           | 4  |
| 10 | 1055.61 | 528.31          | 1038.58        | 519.80          | 1037.60        | 519.30           | Q    | 376.22  | 188.61          | 359.19         | 180.10          | 358.21         | 179.61           | 3  |
| 11 | 1156.66 | 578.83          | 1139.63        | 570.32          | 1138.65        | 569.83           | T    | 248.16  | 124.58          | 231.13         | 116.07          | 230.15         | 115.58           | 2  |
| 12 |         |                 |                |                 |                |                  | K    | 147.11  | 74.06           | 130.09         | 65.55           |                |                  | 1  |

Monoisotopic mass of neutral peptide Mr(calc): 1301.76

Variable modifications:

K5 : Acetyl (K)

Ions Score: 49 Expect: 0.0042

Matches (**Bold Red**): 40/122 fragment ions using 96 most intense peaks

SLVSK<sub>ac</sub>GTLVQTK

H1.1K92

MS/MS Fragmentation of **SLVSKGTLVQTK**

Found in **gi|197692471**, histone H1.2 [Homo sapiens]

Match to Query 15057: 1301.751374 from(651.882963,2+)

From data file HelaHistoneH1.dta

Click mouse within plot area to zoom in by factor of two about that po

Or, Plot from  to  Da

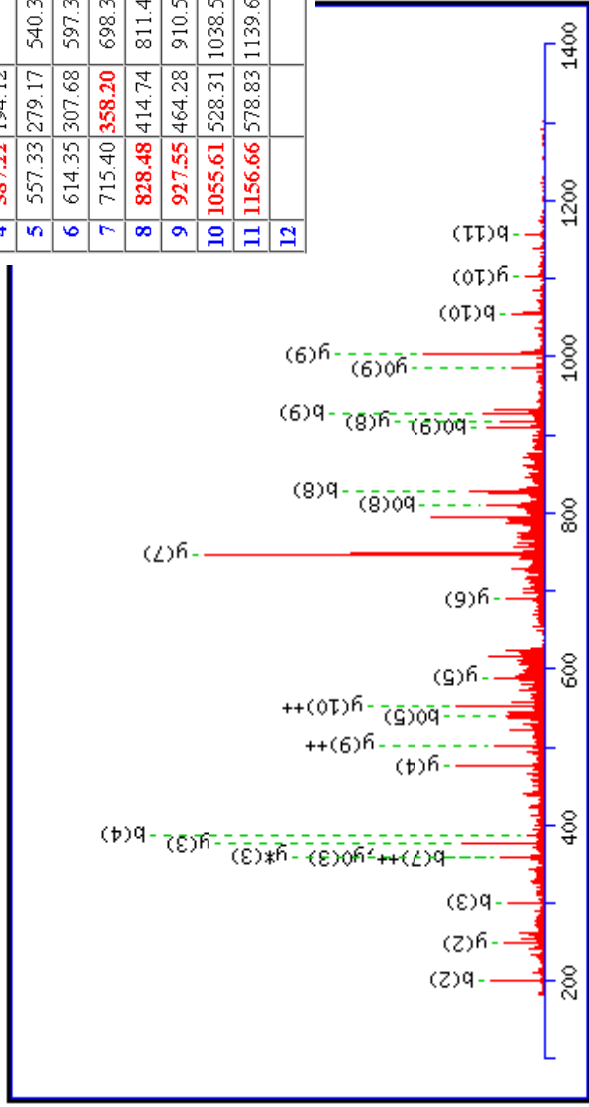

**Monoisotopic mass of neutral peptide Mr(calc): 1301.76**

**Variable modifications:**

**K5** : Acetyl (K)

**Ions Score:** 51 **Expect:** 0.003

**Matches (Bold Red):** 25/122 fragment ions using 57 most intense peaks

| #  | b       | b <sup>++</sup> | b <sup>*</sup> | b <sup>++</sup> | b <sup>0</sup> | b <sup>++</sup> | Seq. | y       | y <sup>++</sup> | y <sup>*</sup> | y <sup>++</sup> | y <sup>0</sup> | y <sup>0++</sup> | #  |
|----|---------|-----------------|----------------|-----------------|----------------|-----------------|------|---------|-----------------|----------------|-----------------|----------------|------------------|----|
| 1  | 88.04   | 44.52           |                |                 | 70.03          | 35.52           | S    |         |                 |                |                 |                |                  | 12 |
| 2  | 201.12  | 101.07          |                |                 | 183.11         | 92.06           | L    | 1215.73 | 608.37          | 1198.70        | 599.86          | 1197.72        | 599.36           | 11 |
| 3  | 300.19  | 150.60          |                |                 | 282.18         | 141.59          | V    | 1102.65 | 551.83          | 1085.62        | 543.31          | 1084.64        | 542.82           | 10 |
| 4  | 387.22  | 194.12          |                |                 | 369.21         | 185.11          | S    | 1003.58 | 502.29          | 986.55         | 493.78          | 985.57         | 493.29           | 9  |
| 5  | 557.33  | 279.17          | 540.30         | 270.66          | 539.32         | 270.16          | K    | 916.55  | 458.78          | 899.52         | 450.26          | 898.54         | 449.77           | 8  |
| 6  | 614.35  | 307.68          | 597.32         | 299.17          | 596.34         | 298.67          | G    | 746.44  | 373.72          | 729.41         | 365.21          | 728.43         | 364.72           | 7  |
| 7  | 715.40  | 358.20          | 698.37         | 349.69          | 697.39         | 349.20          | T    | 689.42  | 345.21          | 672.39         | 336.70          | 671.41         | 336.21           | 6  |
| 8  | 828.48  | 414.74          | 811.46         | 406.23          | 810.47         | 405.74          | L    | 588.37  | 294.69          | 571.34         | 286.18          | 570.36         | 285.68           | 5  |
| 9  | 927.55  | 464.28          | 910.52         | 455.77          | 909.54         | 455.27          | V    | 475.29  | 238.15          | 458.26         | 229.63          | 457.28         | 229.14           | 4  |
| 10 | 1055.61 | 528.31          | 1038.58        | 519.80          | 1037.60        | 519.30          | Q    | 376.22  | 188.61          | 359.19         | 180.10          | 358.21         | 179.61           | 3  |
| 11 | 1156.66 | 578.83          | 1139.63        | 570.32          | 1138.65        | 569.83          | T    | 248.16  | 124.58          | 231.13         | 116.07          | 230.15         | 115.58           | 2  |
| 12 |         |                 |                |                 |                |                 | K    | 147.11  | 74.06           | 130.09         | 65.55           |                |                  | 1  |

pr-GTLVQTK<sub>pm</sub>

H1.1K99

K.GTLVQTK.G (+1) · Mod : 70.00 at K(7) · Retention time : 61.72 min · Precursor m/z : 872.51 · Precursor int. : 1626650.000 · Basepeak int. : 96654.900

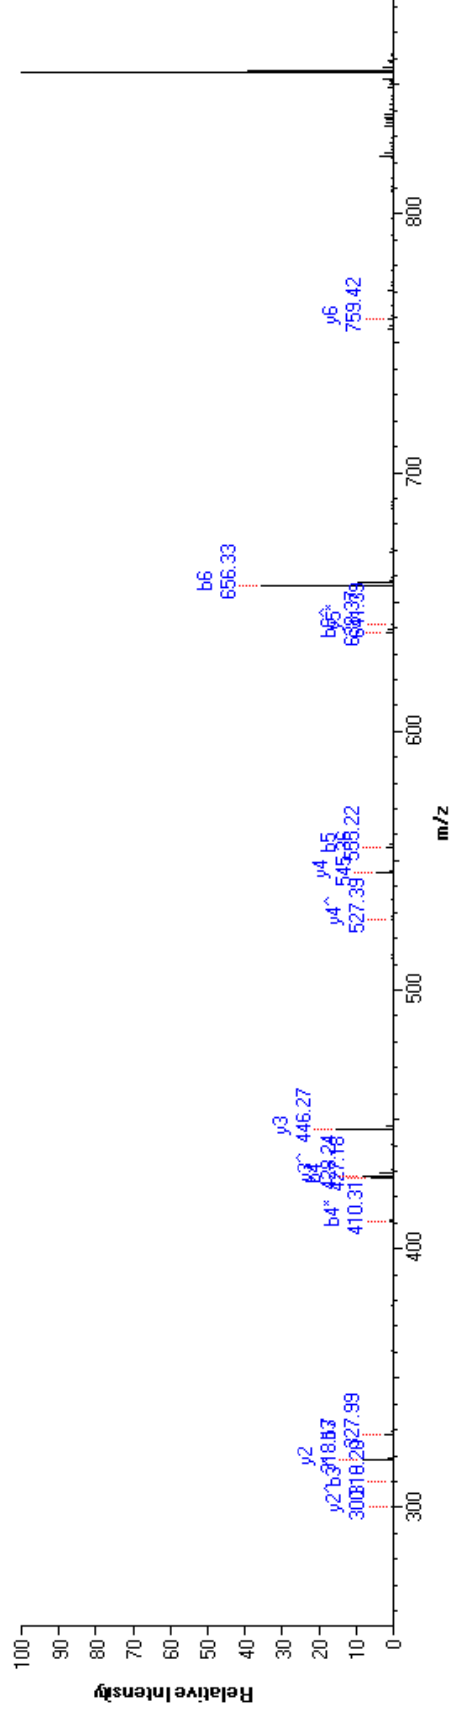

| [b] Seq [w] | b                      | b <sup>°</sup>         | b <sup>•</sup>         | y                       | y <sup>°</sup>         | y <sup>•</sup>         |
|-------------|------------------------|------------------------|------------------------|-------------------------|------------------------|------------------------|
| 1 G 7       | 114.0293               | 97.0027                | 96.0187                | 816.4412                | 799.4147               | 798.4307               |
| 2 T 6       | 215.0770               | 198.0504               | 197.0664               | 759.4197 <sup>***</sup> | 742.3932               | 741.4092               |
| 3 L 5       | 328.1610 <sup>**</sup> | 311.1345               | 310.1505 <sup>**</sup> | 658.3721                | 641.3455 <sup>**</sup> | 640.3615               |
| 4 V 4       | 427.2294 <sup>**</sup> | 410.2029 <sup>**</sup> | 409.2189               | 545.2880 <sup>**</sup>  | 528.2615               | 527.2775 <sup>**</sup> |
| 5 Q 3       | 555.2880 <sup>**</sup> | 538.2615               | 537.2775               | 446.2196 <sup>**</sup>  | 429.1931               | 428.2090 <sup>**</sup> |
| 6 T 2       | 656.3357 <sup>**</sup> | 639.3091               | 638.3251 <sup>**</sup> | 318.1610 <sup>**</sup>  | 301.1345               | 300.1505 <sup>**</sup> |
| 7 K 1       | 854.4307               | 837.4041               | 836.4201               | 217.1133                | 200.0868               | 199.1028               |

# pr-GTGASGSFK<sub>pm</sub> H1.1K108

K.GTGASGSFK.L (+1) - Mod : 70.00 at K(9) - Retention time : 53.98 min - Precursor m/z : 937.46 - Precursor int. : 737522.000 - Basepeak int. : 38930.100

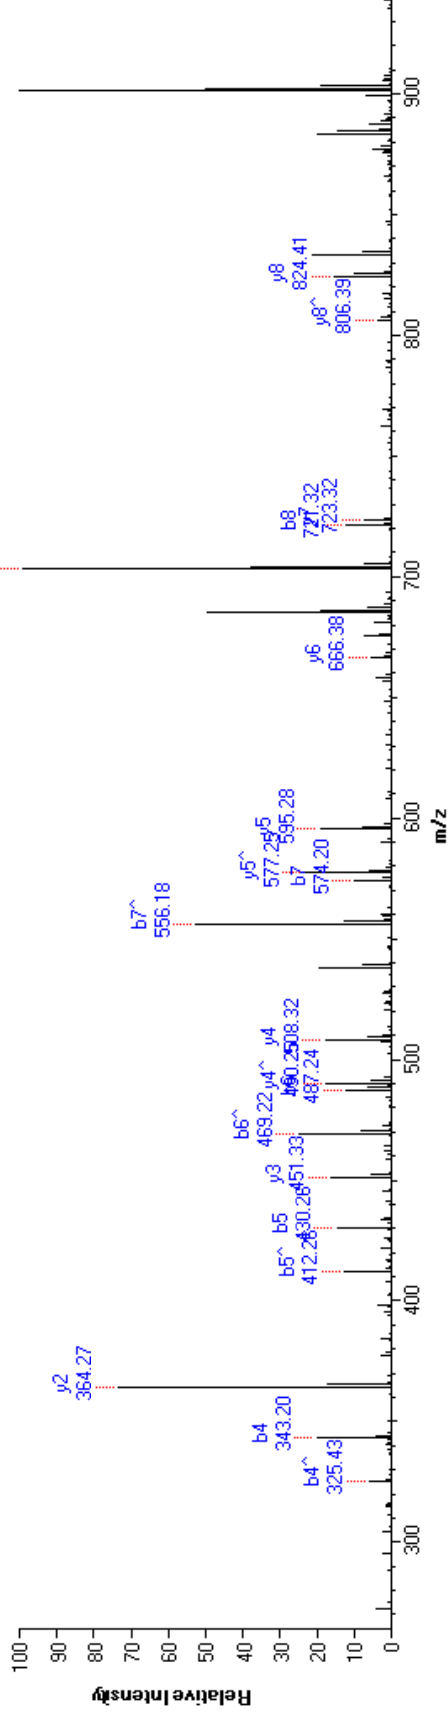

| [b] Seq [y] | b           | b <sup>+</sup> | b <sup>+</sup> | y           | y <sup>+</sup> | y <sup>+</sup> |
|-------------|-------------|----------------|----------------|-------------|----------------|----------------|
| 1 G 9       | 114.0293    | 97.0027        | 96.0187        | 881.3950    | 864.3685       | 863.3844       |
| 2 T 8       | 215.0770    | 198.0504       | 197.0664       | 824.3735 ** | 807.3470       | 806.3630 **    |
| 3 G 7       | 272.0984    | 255.0719       | 254.0879       | 723.3259 ** | 706.2993       | 705.3153       |
| 4 A 6       | 343.1355 ** | 326.1090       | 325.1250 **    | 666.3044 ** | 649.2778       | 648.2938       |
| 5 S 5       | 430.1676 ** | 413.1410       | 412.1570 **    | 595.2673 ** | 578.2407       | 577.2567 **    |
| 6 G 4       | 487.1890 ** | 470.1625       | 469.1785 **    | 508.2352 ** | 491.2087       | 490.2247 **    |
| 7 S 3       | 574.2211 ** | 557.1945       | 556.2105 **    | 451.2138 ** | 434.1873       | 433.2032       |
| 8 F 2       | 721.2895 ** | 704.2629       | 703.2789 **    | 364.1818 ** | 347.1552       | 346.1712       |
| 9 K 1       | 919.3844    | 902.3579       | 901.3738       | 217.1133    | 200.0868       | 199.1028       |

pr-K<sub>pr</sub>AGAAK<sub>pm</sub>

H1.4K129

K.K(+56)AGAAK(+70)A (+1) - Mod : 0.09 at 0(-1) - Retention time : 50.56 min - Precursor m/z : 727.43 - Precursor int. : 219658.000 - Basepeak int. : 51934.200

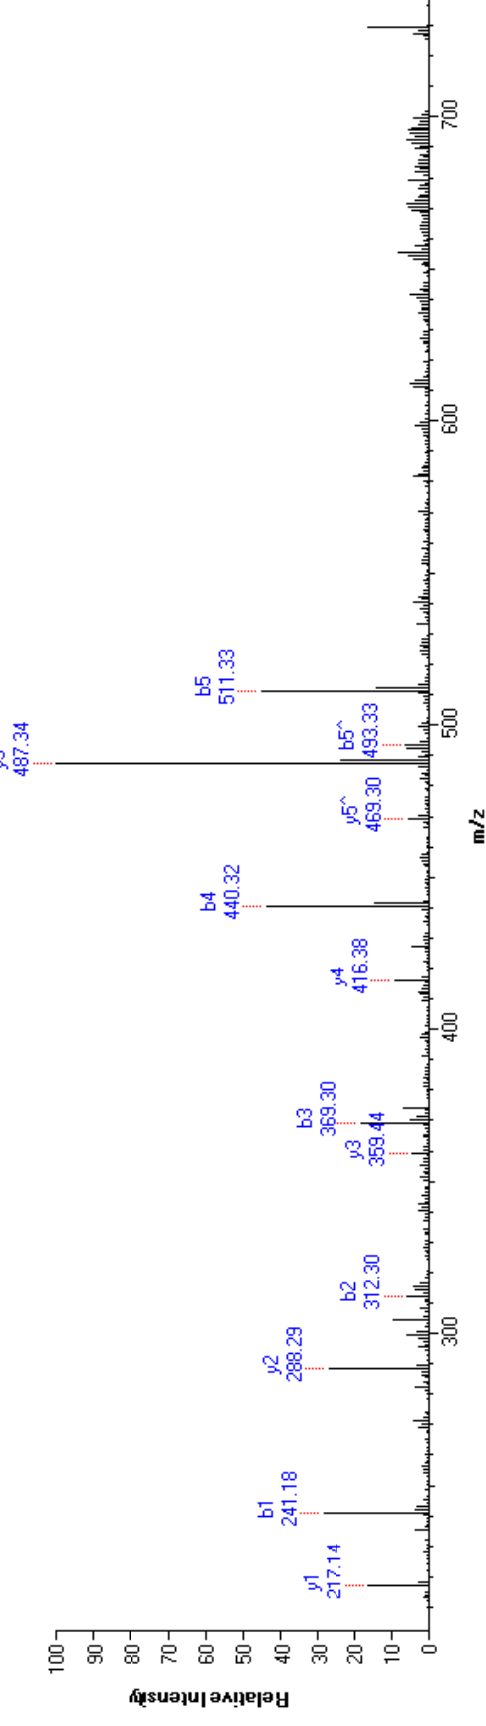

| [b] Seq [y] | b           | b <sup>°</sup> | b <sup>++</sup> | y           | y <sup>°</sup> | y <sup>++</sup> |
|-------------|-------------|----------------|-----------------|-------------|----------------|-----------------|
| 1 K 6       | 241.1028 ** | 224.0762       | 223.0922        | 671.3411    | 654.3146       | 653.3305        |
| 2 A 5       | 312.1399 ** | 295.1133       | 294.1293        | 487.2461 ** | 470.2196       | 469.2356 **     |
| 3 G 4       | 369.1613 ** | 352.1348       | 351.1508        | 416.2090 ** | 399.1825       | 398.1985        |
| 4 A 3       | 440.1985 ** | 423.1719       | 422.1879        | 359.1876 ** | 342.1610       | 341.1770        |
| 5 A 2       | 511.2356 ** | 494.2090       | 493.2250 **     | 288.1505 ** | 271.1239       | 270.1399        |
| 6 K 1       | 709.3305    | 692.3040       | 691.3199        | 217.1133 ** | 200.0858       | 199.1028        |

# pr-AGGTK<sub>pr</sub>PK<sub>pm</sub> H1.2K131

K.AGGTK(+56)PK(+70)K (+1) - Mod : 0.09 at 0(-1) - Retention time : 50.76 min - Precursor m/z : 840.48 - Precursor int. : 364877.000 - Basepeak int. : 178467.000

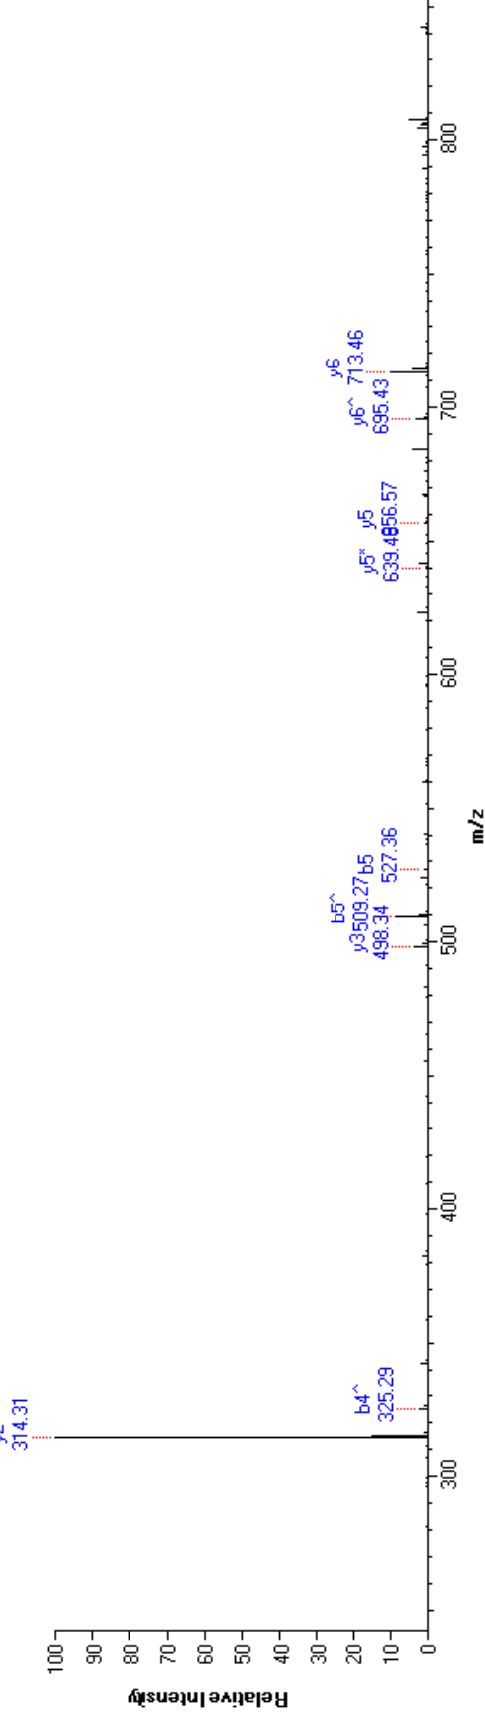

| [b] Seq [w] | b           | b <sup>+</sup> | b <sup>-</sup> | y           | y <sup>+</sup> | y <sup>-</sup> |
|-------------|-------------|----------------|----------------|-------------|----------------|----------------|
| 1 A 7       | 128.0449    | 111.0184       | 110.0344       | 784.3888    | 767.3622       | 766.3782       |
| 2 G 6       | 185.0664    | 168.0399       | 167.0558       | 713.3517 ** | 696.3251       | 695.3411 **    |
| 3 G 5       | 242.0879    | 225.0613       | 224.0773       | 656.3302 ** | 639.3036 **    | 638.3196       |
| 4 T 4       | 343.1355    | 326.1090       | 325.1250 **    | 599.3087    | 582.2822       | 581.2982       |
| 5 K 3       | 527.2305 ** | 510.2039       | 509.2199 **    | 498.2611 ** | 481.2345       | 480.2505       |
| 6 P 2       | 624.2833    | 607.2567       | 606.2727       | 314.1661 ** | 297.1396       | 296.1555       |
| 7 K 1       | 822.3782    | 805.3517       | 804.3677       | 217.1133    | 200.0868       | 199.1028       |

pr-K<sub>pr</sub>PAGAAK<sub>pm</sub>

H1.3K138

R.K(+56)PAGAAK(+70)K (+1) - Mod : 0.09 at 0(-1) - Retention time : 51.29 min - Precursor m/z : 824.49 - Precursor int. : 1825680.000 - Basepeak int. : 1018620.000

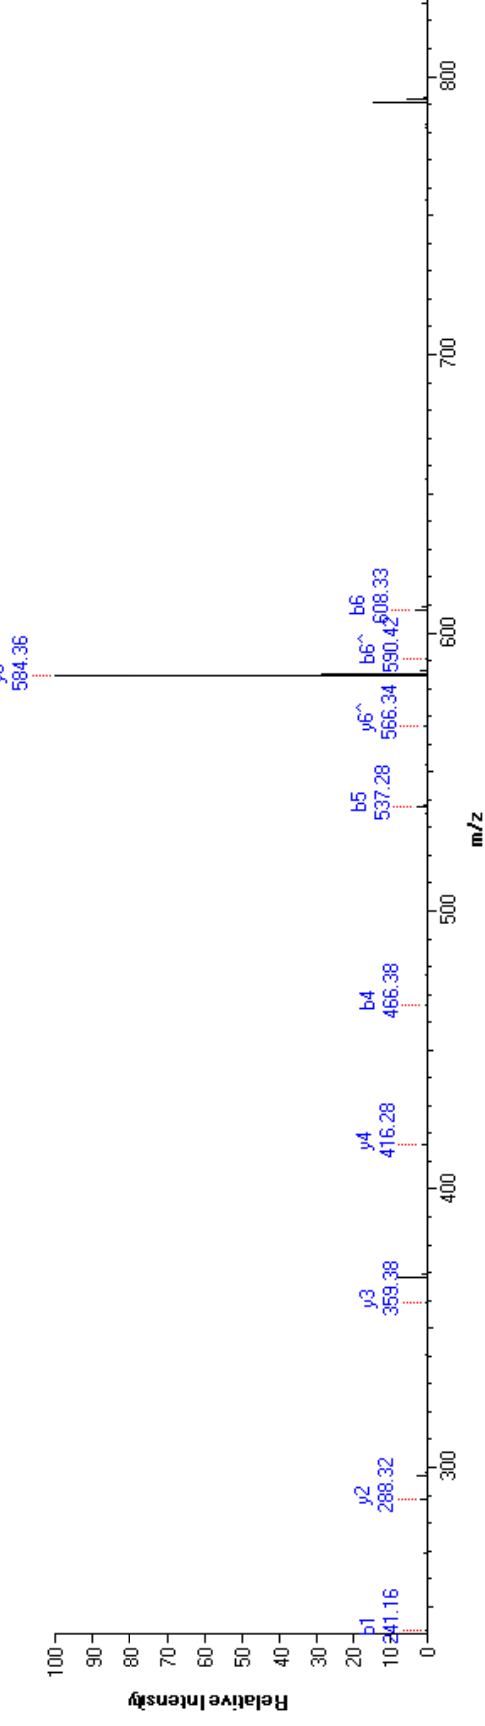

| [b] Seq [y] | b           | b <sup>+</sup> | b <sup>+</sup> | y           | y <sup>+</sup> | y <sup>+</sup> |
|-------------|-------------|----------------|----------------|-------------|----------------|----------------|
| 1 K 7       | 241.1028 ** | 224.0762       | 223.0922       | 768.3939    | 751.3673       | 750.3833       |
| 2 P 6       | 338.1555    | 321.1290       | 320.1450       | 584.2989 ** | 567.2723       | 566.2883 **    |
| 3 A 5       | 409.1927    | 392.1661       | 391.1821       | 487.2461    | 470.2196       | 469.2356       |
| 4 G 4       | 466.2141 ** | 449.1876       | 448.2036       | 416.2090 ** | 399.1825       | 398.1985       |
| 5 A 3       | 537.2512 ** | 520.2247       | 519.2407       | 359.1876 ** | 342.1610       | 341.1770       |
| 6 A 2       | 608.2883 ** | 591.2618       | 590.2778 **    | 288.1505 ** | 271.1239       | 270.1399       |
| 7 K 1       | 806.3833    | 789.3568       | 788.3727       | 217.1133    | 200.0868       | 199.1028       |

# pr-AAGGATPK<sub>pm</sub> H1.2K150

K.AAGGATPK.K (+1) - Mod : 70.00 at K[8] - Retention time : 48.19 min - Precursor m/z : 798.43 - Precursor int. : 155625.000 - Basepeak int. : 55302.100

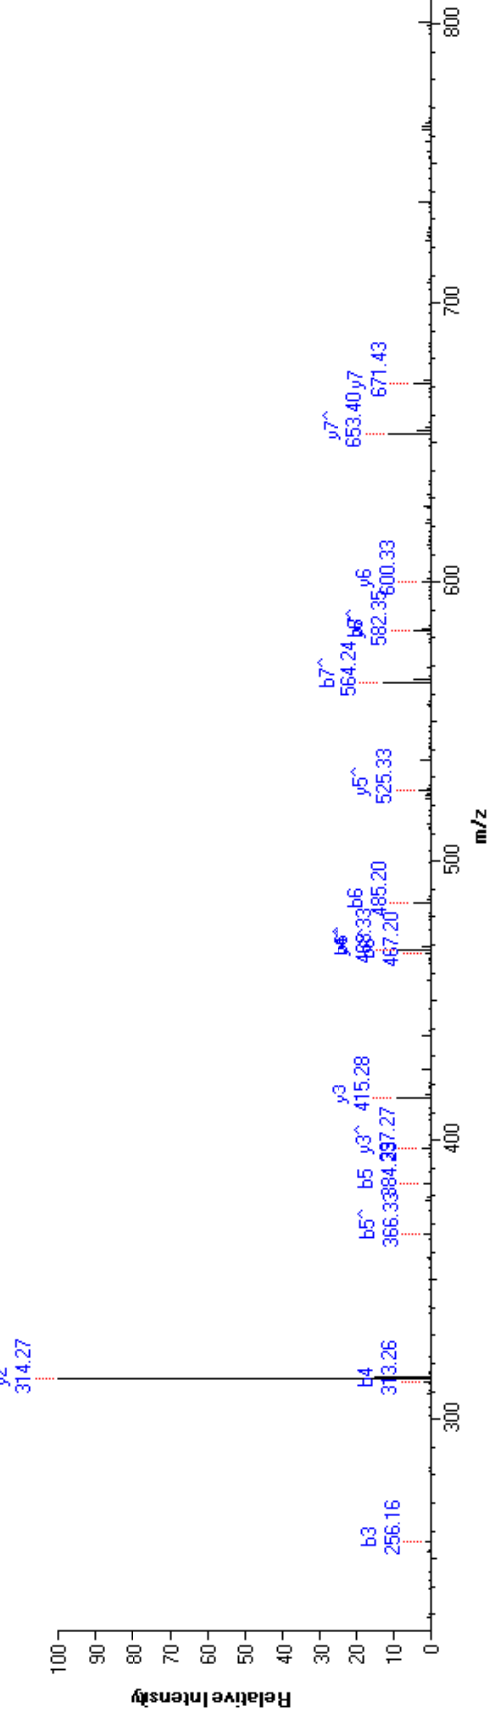

| [b] Seq [w] | b           | b <sup>°</sup> | b <sup>°</sup> | y           | y <sup>°</sup> | y <sup>°</sup> |
|-------------|-------------|----------------|----------------|-------------|----------------|----------------|
| 1 A 8       | 128.0449    | 111.0184       | 110.0344       | 742.3680    | 725.3415       | 724.3575       |
| 2 A 7       | 199.0820    | 182.0555       | 181.0715       | 671.3309 ** | 654.3044       | 653.3204 **    |
| 3 G 6       | 256.1035 ** | 239.0770       | 238.0929       | 600.2938 ** | 583.2673       | 582.2833 **    |
| 4 G 5       | 313.1250 ** | 296.0984       | 295.1144       | 543.2723    | 526.2458       | 525.2618 **    |
| 5 A 4       | 384.1621 ** | 367.1355       | 366.1515 **    | 486.2509    | 469.2244       | 468.2403 **    |
| 6 T 3       | 485.2097 ** | 468.1832 **    | 467.1992 **    | 415.2138 ** | 398.1873       | 397.2032 **    |
| 7 P 2       | 582.2625 ** | 565.2360       | 564.2520 **    | 314.1661 ** | 297.1396       | 296.1555       |
| 8 K 1       | 780.3575    | 763.3309       | 762.3469       | 217.1133    | 200.0868       | 199.1028       |

pr-AAGAK<sub>pm</sub>

H1.5K150

K.AAGAK(+70)K (+1) - Mod : 0.07 at 0(-1) - Retention time : 46.72 min - Precursor m/z : 543.31 - Precursor int. : 231618.000 - Basepeak int. : 130740.000

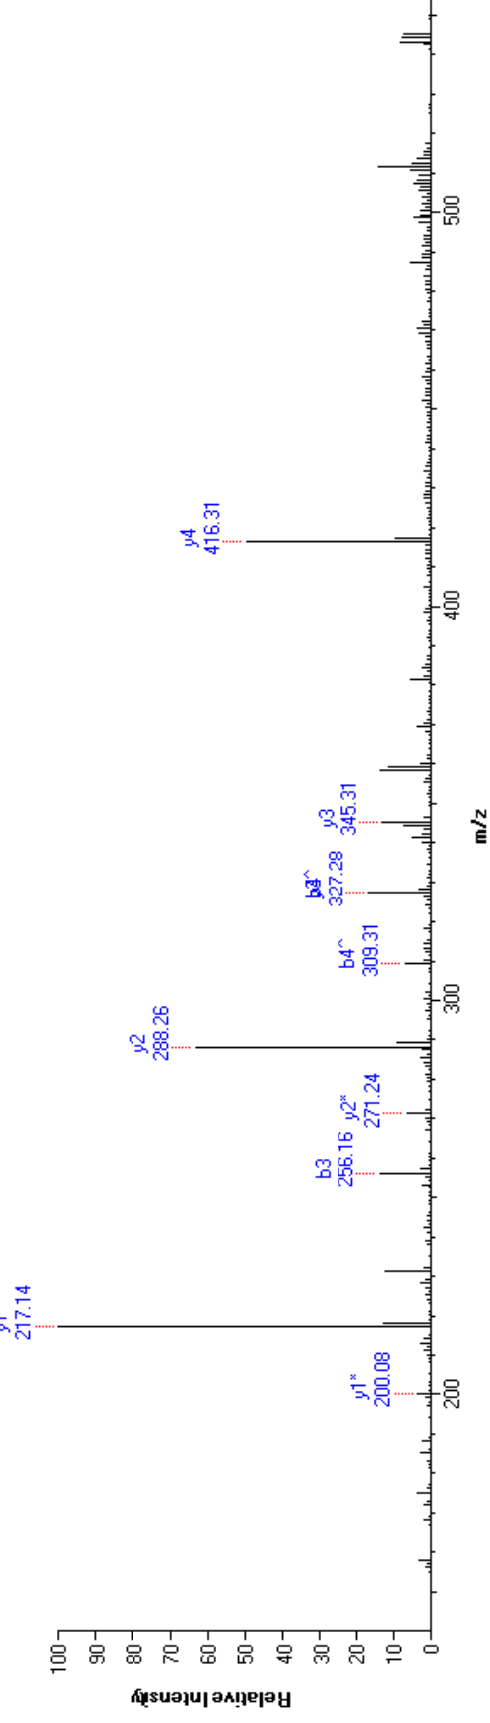

| [b] Seq [y] | b           | b <sup>+</sup> | b <sup>++</sup> | y           | y <sup>+</sup> | y <sup>++</sup> |
|-------------|-------------|----------------|-----------------|-------------|----------------|-----------------|
| 1 A 5       | 128.0449    | 111.0184       | 110.0344        | 487.2461    | 470.2196       | 463.2356        |
| 2 A 4       | 199.0820    | 182.0555       | 181.0715        | 416.2090 ** | 399.1825       | 398.1985        |
| 3 G 3       | 256.1035 ** | 239.0770       | 238.0929        | 345.1719 ** | 328.1454       | 327.1613 **     |
| 4 A 2       | 327.1406 ** | 310.1141       | 309.1301 **     | 288.1505 ** | 271.1239 **    | 270.1399        |
| 5 K 1       | 525.2356    | 508.2090       | 507.2250        | 217.1133 ** | 200.0868 **    | 199.1028        |

pr-K<sub>pr</sub>PAAAATVTK<sub>pm</sub>

H1.2K170

K.K(+56)PAAAATVTK.K (+1) - Mod : 70.00 at K(9) - Retention time : 60.65 min - Precursor m/z : 1068.63 - Precursor intensity : 780661.000 - Basepeak intensity : 69151.900

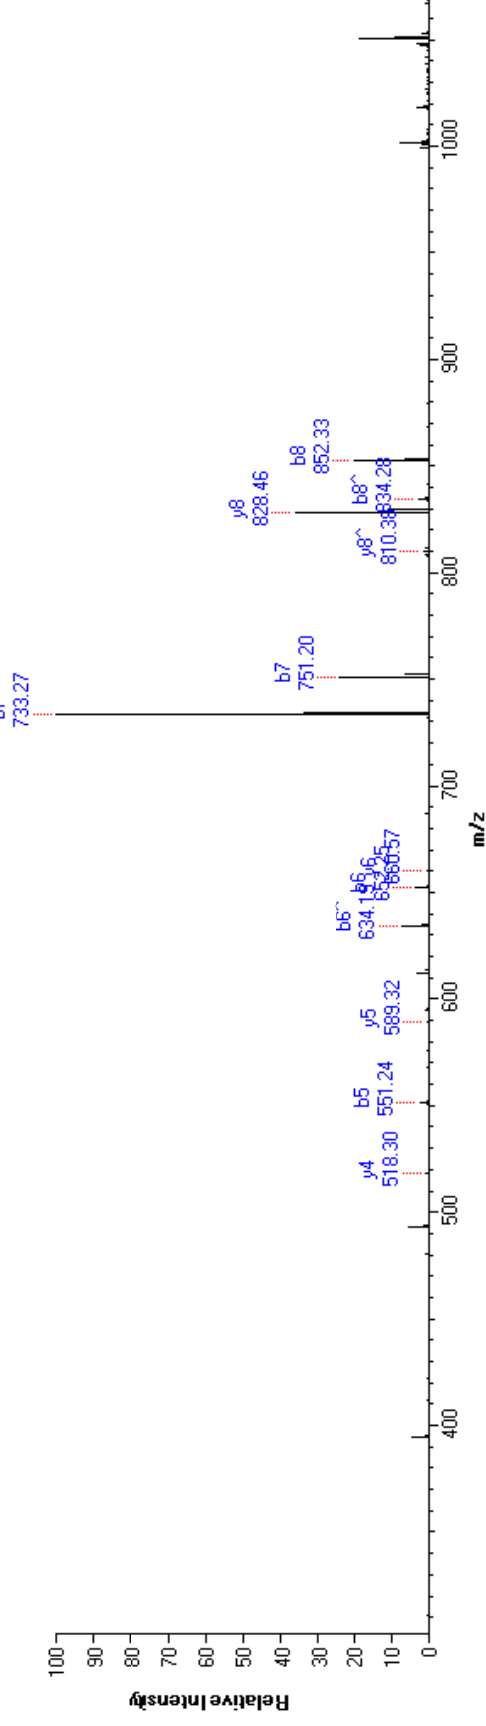

| (b) Seq (y) | b           | b <sup>+</sup> | b <sup>+</sup> | b <sup>+</sup> | y        | y <sup>+</sup> | y <sup>+</sup> |
|-------------|-------------|----------------|----------------|----------------|----------|----------------|----------------|
| 1 K 9       | 241.1028    | 224.0762       | 223.0922       | 1012.5362      | 995.5096 | 994.5256       |                |
| 2 P 8       | 338.1555    | 321.1290       | 320.1450       | 828.4412 **    | 811.4147 | 810.4307 **    |                |
| 3 A 7       | 409.1927    | 392.1661       | 391.1821       | 731.3884       | 714.3619 | 713.3779       |                |
| 4 A 6       | 480.2298    | 463.2032       | 462.2192       | 660.3513 **    | 643.3248 | 642.3408       |                |
| 5 A 5       | 551.2668 ** | 534.2404       | 533.2563       | 589.3142 **    | 572.2877 | 571.3036       |                |
| 6 T 4       | 652.3146 ** | 635.2880       | 634.3040 **    | 518.2771 **    | 501.2506 | 500.2665       |                |
| 7 V 3       | 751.3829 ** | 734.3564       | 733.3724 **    | 417.2294       | 400.2029 | 399.2189       |                |
| 8 T 2       | 852.4307 ** | 835.4041       | 834.4201 **    | 318.1610       | 301.1345 | 300.1505       |                |
| 9 K 1       | 1050.5256   | 1033.4990      | 1032.5150      | 217.1133       | 200.0868 | 199.1028       |                |

# pr-K<sub>pr</sub>PAAAAAGAK<sub>pm</sub> H1.4K170

K.K(+56)PAAAAAGAK(+70)K (+1) - Mod : 0.09 at 0(-1) - Retention time : 58.21 min - Precursor m/z : 966.56 - Precursor int. : 1196390.000 - Basepeak int. : 97508.800

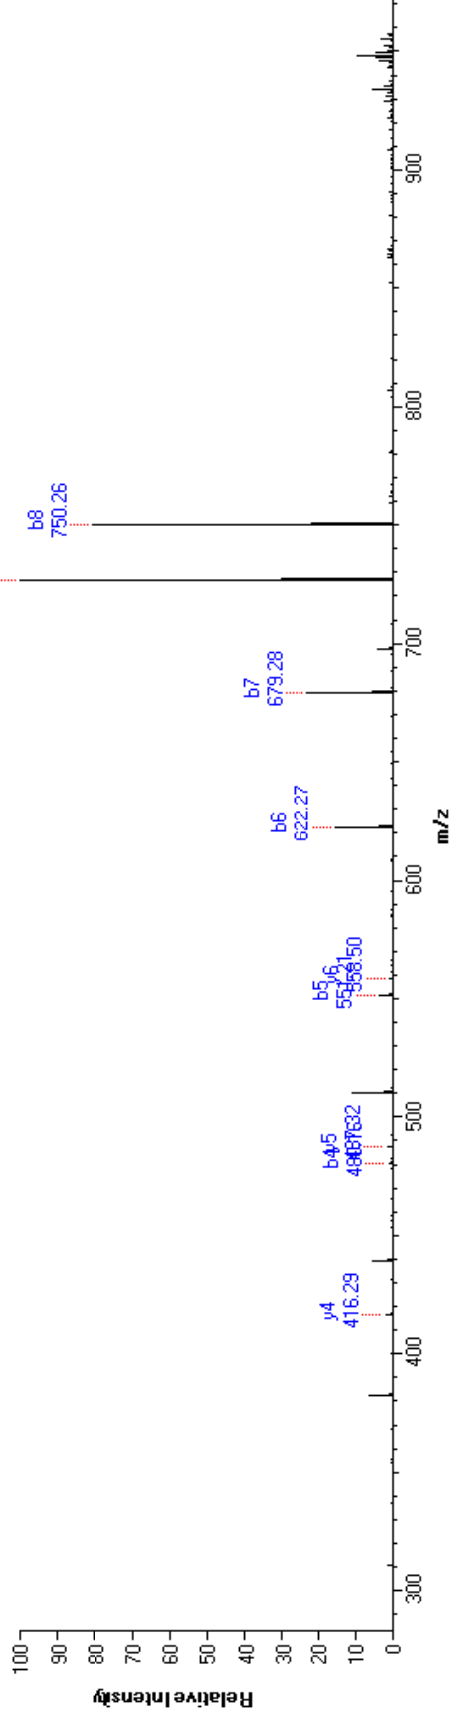

| [b] Seq [w] | b           | b°       | b°       | y           | y°       | y°       |
|-------------|-------------|----------|----------|-------------|----------|----------|
| 1 K 9       | 241.1028    | 224.0762 | 223.0922 | 910.4681    | 893.4415 | 892.4575 |
| 2 P 8       | 338.1555    | 321.1290 | 320.1450 | 726.3731 ** | 709.3466 | 708.3625 |
| 3 A 7       | 409.1927    | 392.1661 | 391.1821 | 629.3204    | 612.2938 | 611.3098 |
| 4 A 6       | 480.2298 ** | 463.2032 | 462.2192 | 558.2833 ** | 541.2567 | 540.2727 |
| 5 A 5       | 551.2668 ** | 534.2404 | 533.2563 | 487.2461 ** | 470.2196 | 469.2356 |
| 6 A 4       | 622.3040 ** | 605.2775 | 604.2934 | 416.2090 ** | 399.1825 | 398.1985 |
| 7 G 3       | 679.3254 ** | 662.2989 | 661.3149 | 345.1719    | 328.1454 | 327.1613 |
| 8 A 2       | 750.3625 ** | 733.3360 | 732.3520 | 288.1505    | 271.1239 | 270.1399 |
| 9 K 1       | 948.4575    | 931.4310 | 930.4470 | 217.1133    | 200.0868 | 199.1028 |

pr-K<sub>pr</sub>VAK<sub>pm</sub>

H1.3K174

K.K(+56)VAK(+70).S (+1) - Mod : 0.09 at 0(-1) - Retention time : 56.24 min - Precursor m/z : 627.40 - Precursor int. : 1059580.000 - Basepeak int. : 341168.000

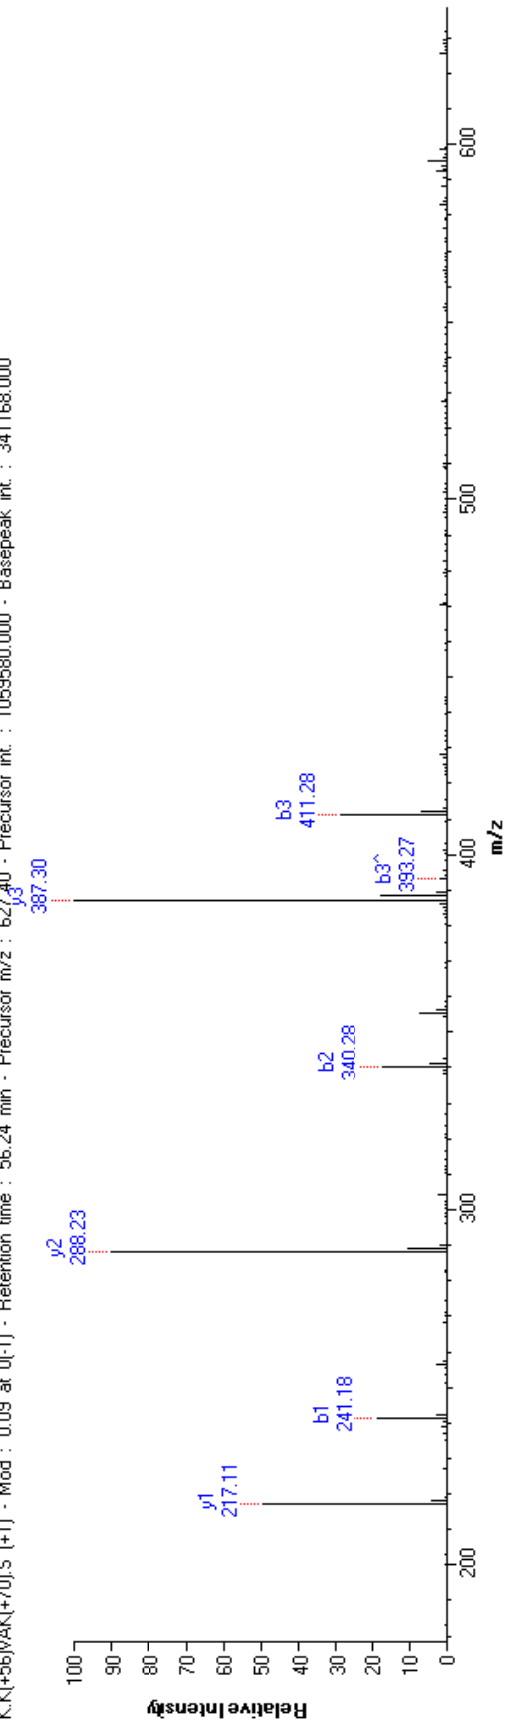

| [b] Seq [y] | b           | b'       | b''         | y           | y'       | y''      |
|-------------|-------------|----------|-------------|-------------|----------|----------|
| 1 K 4       | 241.1028 ** | 224.0762 | 223.0922    | 571.3138    | 554.2873 | 553.3033 |
| 2 V 3       | 340.1712 ** | 323.1447 | 322.1606    | 387.2189 ** | 370.1923 | 369.2083 |
| 3 A 2       | 411.2083 ** | 394.1818 | 393.1978 ** | 288.1505 ** | 271.1239 | 270.1399 |
| 4 K 1       | 609.3033    | 592.2767 | 591.2927    | 217.1133 ** | 200.0868 | 199.1028 |

# pr-AVK<sub>pr</sub>PK<sub>pm</sub>

H1.2K186

K.AVK(+56)PK(+70)A (+1) - Mod : 0.09 at 0(-1) - Retention time : 56.74 min - Precursor m/z : 724.46 - Precursor int. : 5889620.000 - Basepeak int. : 3701790.000

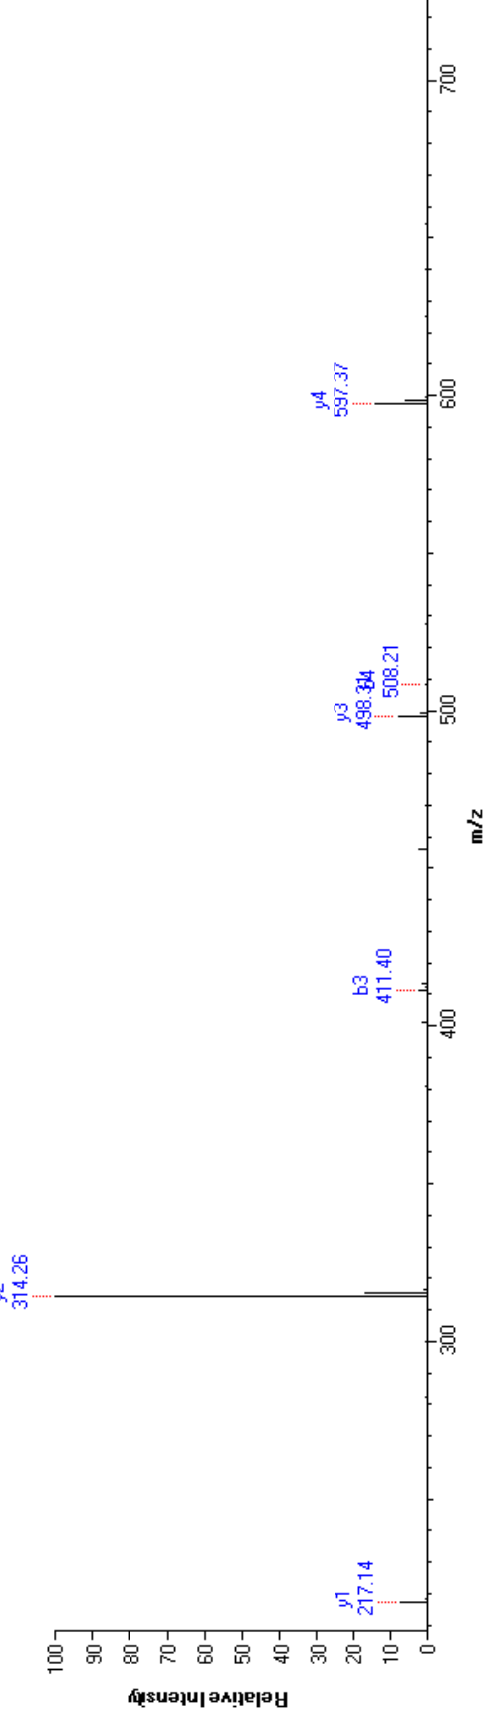

| [b] Seq [y] | b           | b <sup>+</sup> | b <sup>++</sup> | y           | y <sup>+</sup> | y <sup>++</sup> |
|-------------|-------------|----------------|-----------------|-------------|----------------|-----------------|
| 1 A 5       | 128.0449    | 111.0184       | 110.0344        | 668.3666    | 651.3400       | 650.3560        |
| 2 V 4       | 227.1133    | 210.0868       | 209.1028        | 597.3295 ** | 580.3029       | 579.3189        |
| 3 K 3       | 411.2083 ** | 394.1818       | 393.1978        | 498.2611 ** | 481.2345       | 480.2505        |
| 4 P 2       | 508.2611 ** | 491.2345       | 490.2505        | 314.1661 ** | 297.1396       | 296.1555        |
| 5 K 1       | 706.3560    | 689.3295       | 688.3455        | 217.1133 ** | 200.0868       | 199.1028        |

pr-K<sub>pr</sub>KAAK<sub>pm</sub>

H1.5K184

K.K(+56)KAAK(+70).K (+1) - Mod : 0.05 at 0(-1) - Retention time : 50.56 min - Precursor m/z : 727.43 - Precursorq int. : 219658.000 - Basepeak int. : 51934.200

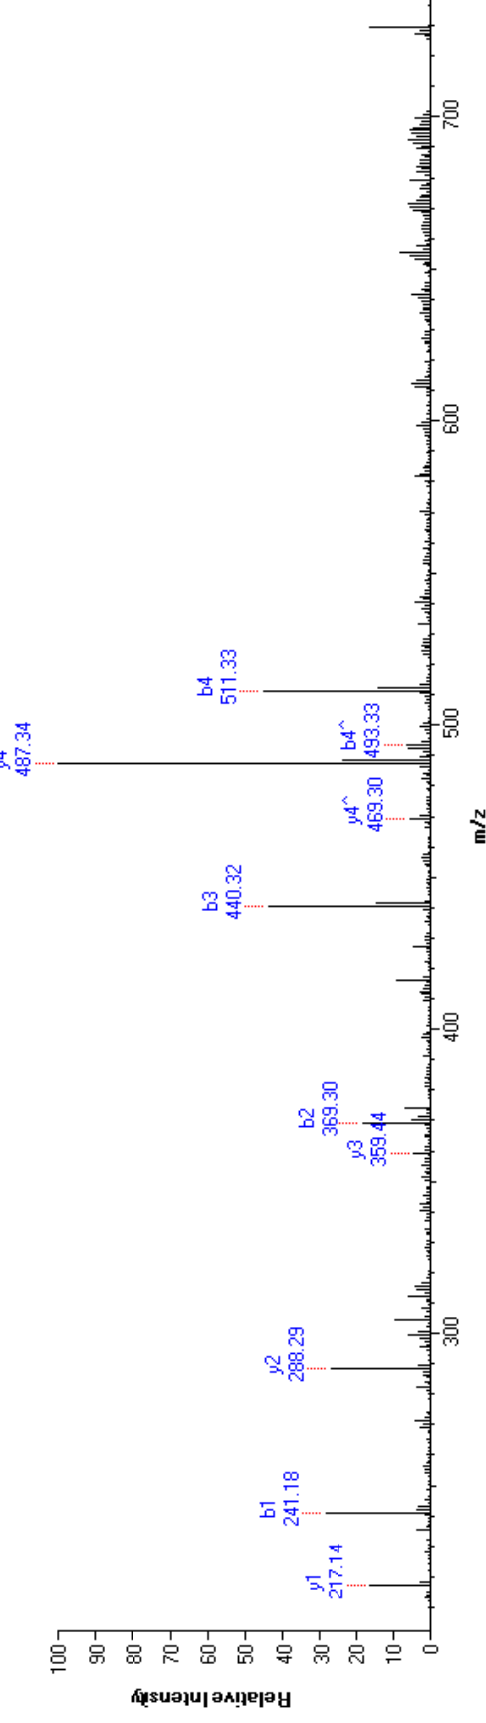

| [b] Seq [y] | b           | b <sup>+</sup> | b <sup>++</sup> | y           | y <sup>+</sup> | y <sup>++</sup> |
|-------------|-------------|----------------|-----------------|-------------|----------------|-----------------|
| 1 K 5       | 241.1028 ** | 224.0762       | 223.0922        | 671.3775    | 654.3510       | 653.3669        |
| 2 K 4       | 369.1978 ** | 352.1712       | 351.1872        | 487.2825 ** | 470.2560       | 469.2720 **     |
| 3 A 3       | 440.2349 ** | 423.2083       | 422.2243        | 359.1876 ** | 342.1610       | 341.1770        |
| 4 A 2       | 511.2720 ** | 494.2454       | 493.2614 **     | 288.1505 ** | 271.1239       | 270.1399        |
| 5 K 1       | 709.3669    | 692.3404       | 691.3564        | 217.1133 ** | 200.0868       | 199.1028        |

pr-SPAKAK<sub>pm</sub>

H1.1K196

K.SPAKAK(+70)<sub>A</sub> (+1) - Mod : 0.06 at 0(-1) - Retention time : 50.56 min - Precursor m/z : 727.43 - Precursor ion<sub>y4</sub> : 219658.000 - Basepeak ion : 51934.200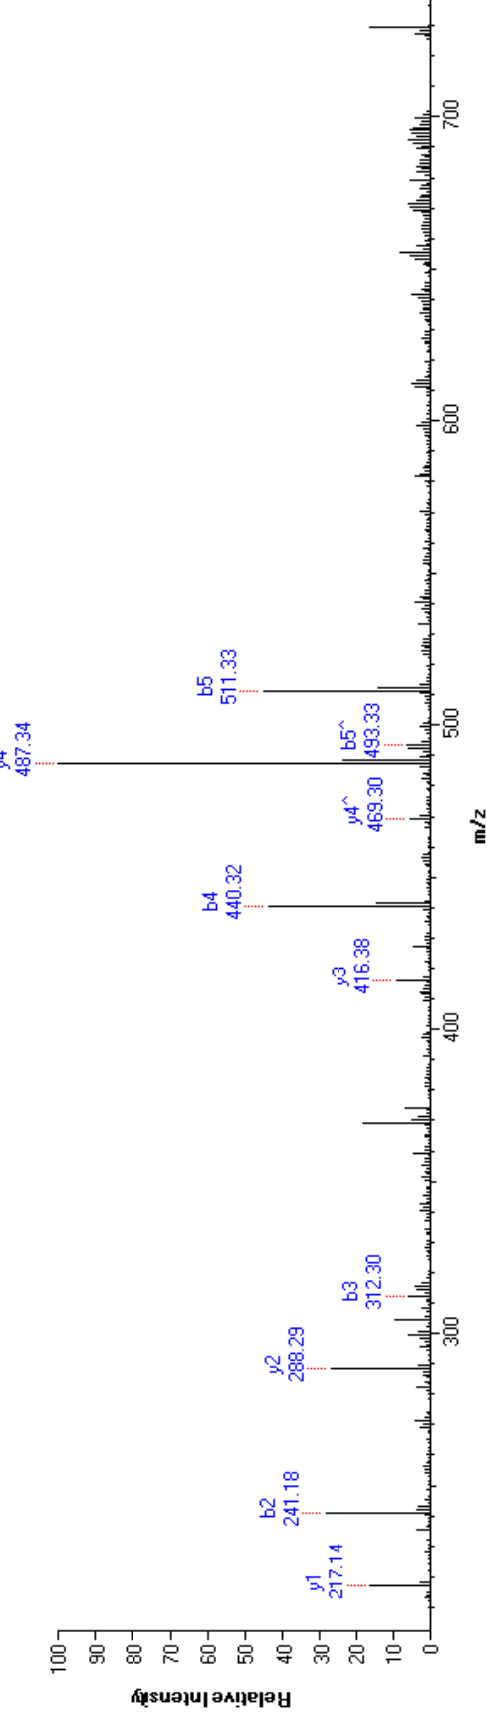

| [b] Seq [y] |     | b           | b <sup>o</sup> | b <sup>o</sup> | y           | y <sup>o</sup> | y <sup>o</sup> |
|-------------|-----|-------------|----------------|----------------|-------------|----------------|----------------|
| 1           | S 6 | 144.0399    | 127.0133       | 126.0293       | 671.3673    | 654.3408       | 653.3568       |
| 2           | P 5 | 241.0926 ** | 224.0661       | 223.0821       | 584.3353    | 567.3087       | 566.3247       |
| 3           | A 4 | 312.1297 ** | 295.1032       | 294.1192       | 487.2825 ** | 470.2560       | 469.2720 **    |
| 4           | K 3 | 440.2247 ** | 423.1982       | 422.2141       | 416.2454 ** | 399.2189       | 398.2349       |
| 5           | A 2 | 511.2618 ** | 494.2353       | 493.2512 **    | 288.1505 ** | 271.1239       | 270.1399       |
| 6           | K 1 | 709.3568    | 692.3302       | 691.3462       | 217.1133 ** | 200.0868       | 199.1028       |

pr-AVK<sub>pr</sub>PK<sub>pm</sub>

H1.1K201

K.VAK(+56)PK.K (+1) - Mod : 70.00 at K(5) - Retention time : 57.80 min - Precursor m/z : 724.46 - Precursor int. : 1044080.000 - Basepeak int. : 790509.000

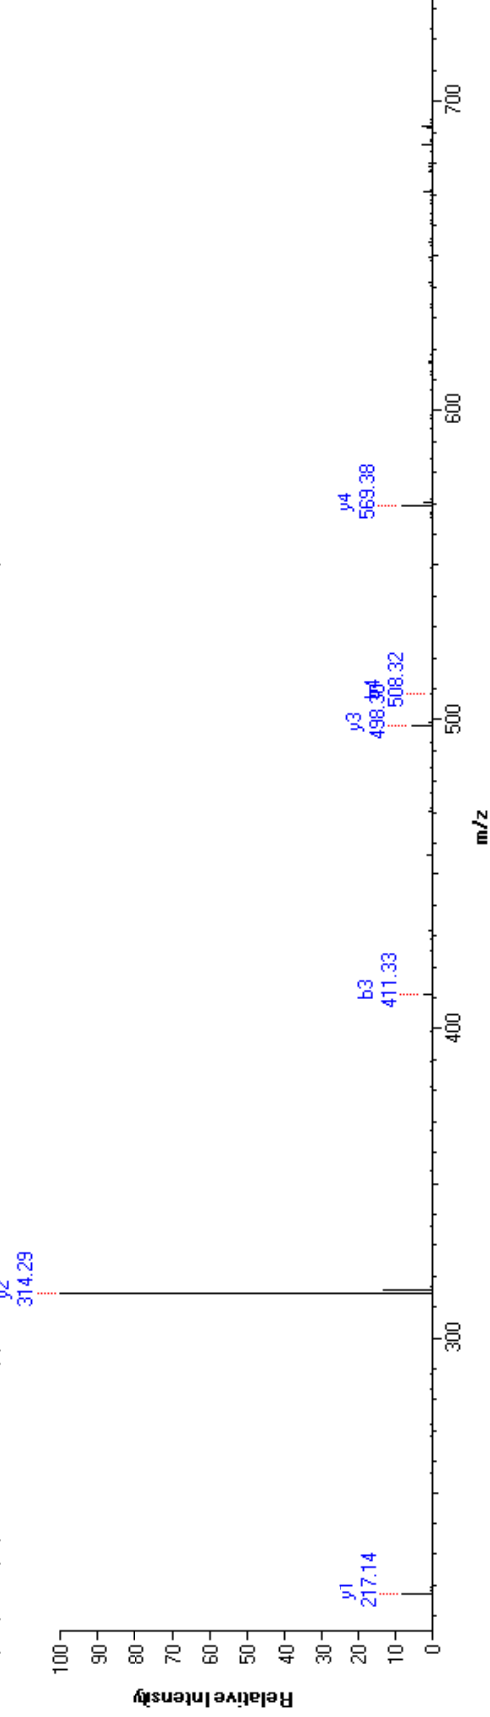

| [b] Seq [y] | b           | b <sup>+</sup> | b <sup>++</sup> | y           | y <sup>+</sup> | y <sup>++</sup> |
|-------------|-------------|----------------|-----------------|-------------|----------------|-----------------|
| 1 V 5       | 156.0762    | 139.0497       | 138.0657        | 668.3666    | 651.3400       | 650.3560        |
| 2 A 4       | 227.1133    | 210.0868       | 209.1028        | 569.2982 ** | 552.2716       | 551.2876        |
| 3 K 3       | 411.2083 ** | 394.1818       | 393.1978        | 498.2611 ** | 481.2345       | 480.2505        |
| 4 P 2       | 508.2611 ** | 491.2345       | 490.2505        | 314.1661 ** | 297.1396       | 296.1555        |
| 5 K 1       | 706.3560    | 689.3295       | 688.3455        | 217.1133 ** | 200.0868       | 199.1028        |

pr-AAK<sub>pr</sub>PK<sub>pm</sub>

H1.3K206

K.AAK(+56)PK.S (+1) - Mod : 70.00 at K(5) - Retention time : 67.73 min - Precursor m/z : 696.43 - Precursor int. : 4633510.000 - Basepeak int. : 7264750.000

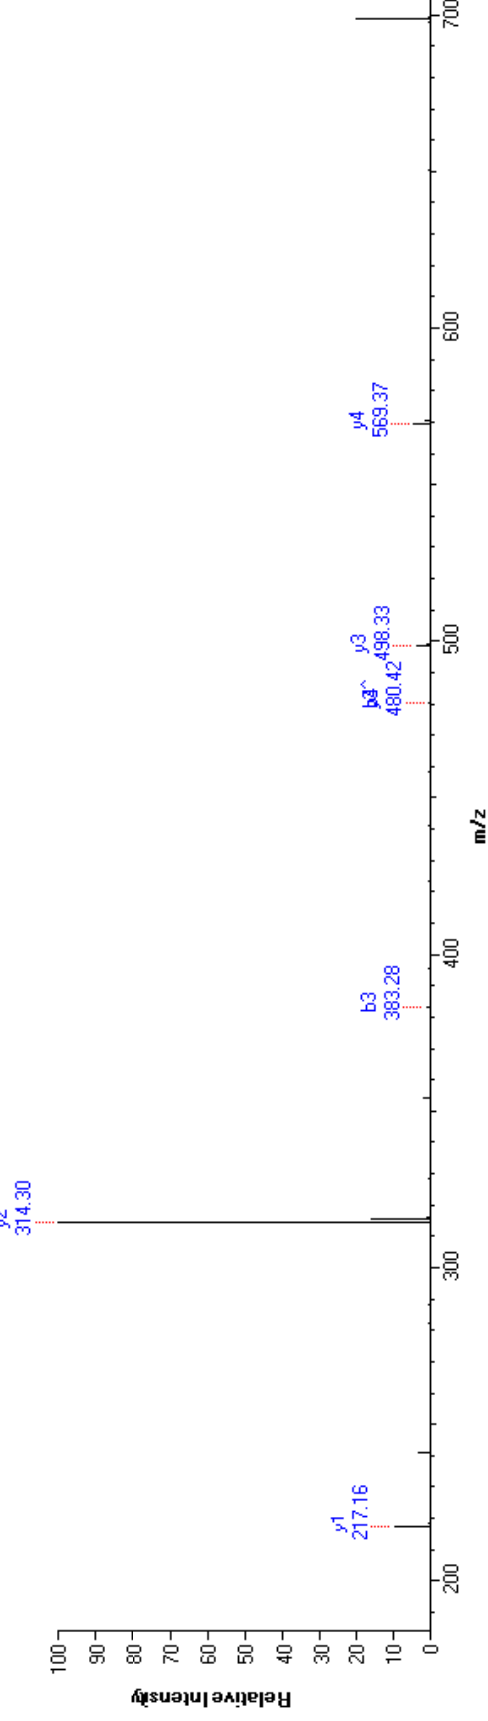

| [b] Seq [y] | b           | b <sup>+</sup> | b <sup>++</sup> | y           | y <sup>+</sup> | y <sup>++</sup> |
|-------------|-------------|----------------|-----------------|-------------|----------------|-----------------|
| 1 A 5       | 128.0449    | 111.0184       | 110.0344        | 640.3353    | 623.3087       | 622.3247        |
| 2 A 4       | 199.0820    | 182.0555       | 181.0715        | 569.2982 ** | 552.2716       | 551.2876        |
| 3 K 3       | 383.1770 ** | 366.1505       | 365.1664        | 498.2611 ** | 481.2345       | 480.2505 **     |
| 4 P 2       | 480.2298 ** | 463.2032       | 462.2192        | 314.1661 ** | 297.1396       | 296.1555        |
| 5 K 1       | 678.3247    | 661.2982       | 660.3141        | 217.1133 ** | 200.0868       | 199.1028        |

# pr-TAK<sub>pr</sub>PK<sub>pm</sub>

H1.1K221

K.TAK(+56)PK.K (+1) - Mod : 70.00 at K(5) - <sup>y2</sup>Retention time : 51.44 min - Precursor m/z : 726.44 - Precursor int. : 970325.000 - Basepeak int. : 566479.000

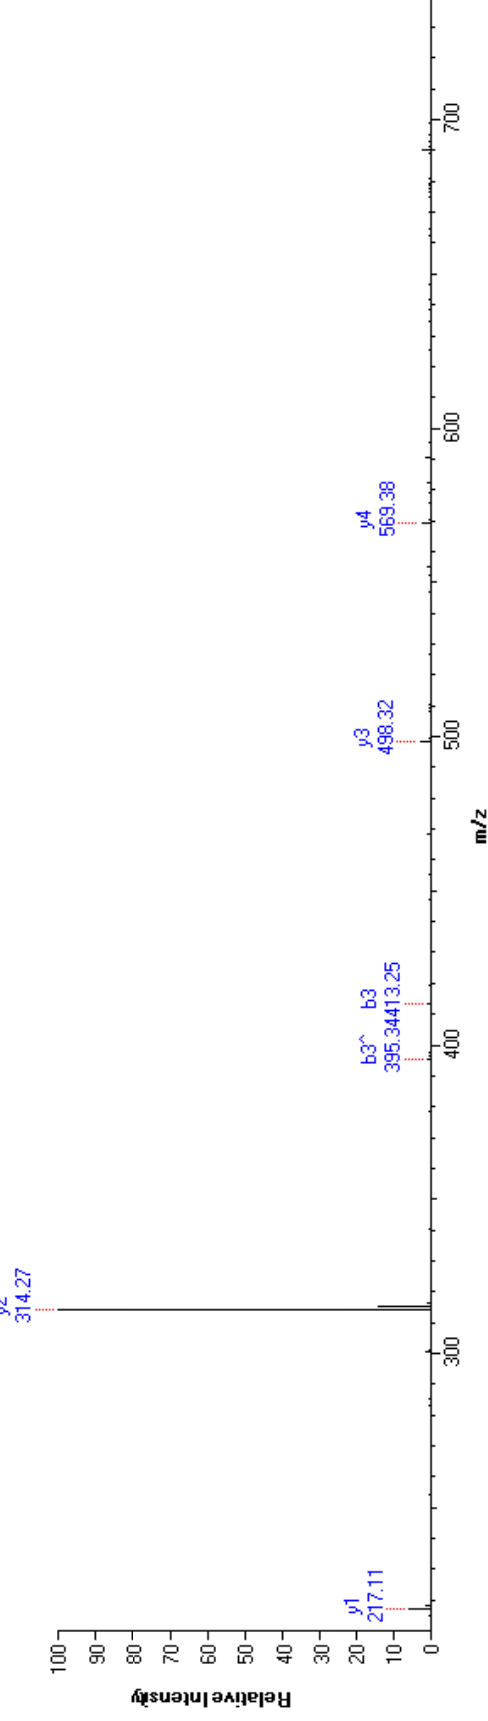

| [b] Seq [y] | b           | b <sup>*</sup> | b <sup>**</sup> | y           | y <sup>*</sup> | y <sup>**</sup> |
|-------------|-------------|----------------|-----------------|-------------|----------------|-----------------|
| 1 T 5       | 158.0555    | 141.0290       | 140.0449        | 670.3458    | 653.3193       | 652.3353        |
| 2 A 4       | 229.0926    | 212.0661       | 211.0821        | 569.2982 ** | 552.2716       | 551.2876        |
| 3 K 3       | 413.1876 ** | 396.1610       | 395.1770 **     | 498.2611 ** | 481.2345       | 480.2505        |
| 4 P 2       | 510.2403    | 493.2138       | 492.2298        | 314.1661 ** | 297.1396       | 296.1555        |
| 5 K 1       | 708.3353    | 691.3088       | 690.3247        | 217.1133 ** | 200.0868       | 199.1028        |

pr-K<sub>pr</sub>AAPK<sub>pm</sub>

H1.1K226

K.KAAPK(+70)K (+1) - Mod : 56.00 at K(1) - Retention time : 51.33 min - Precursor m/z : 696.43 - Precursor int. : 1744910.000 - Basepeak int. : 1084410.000

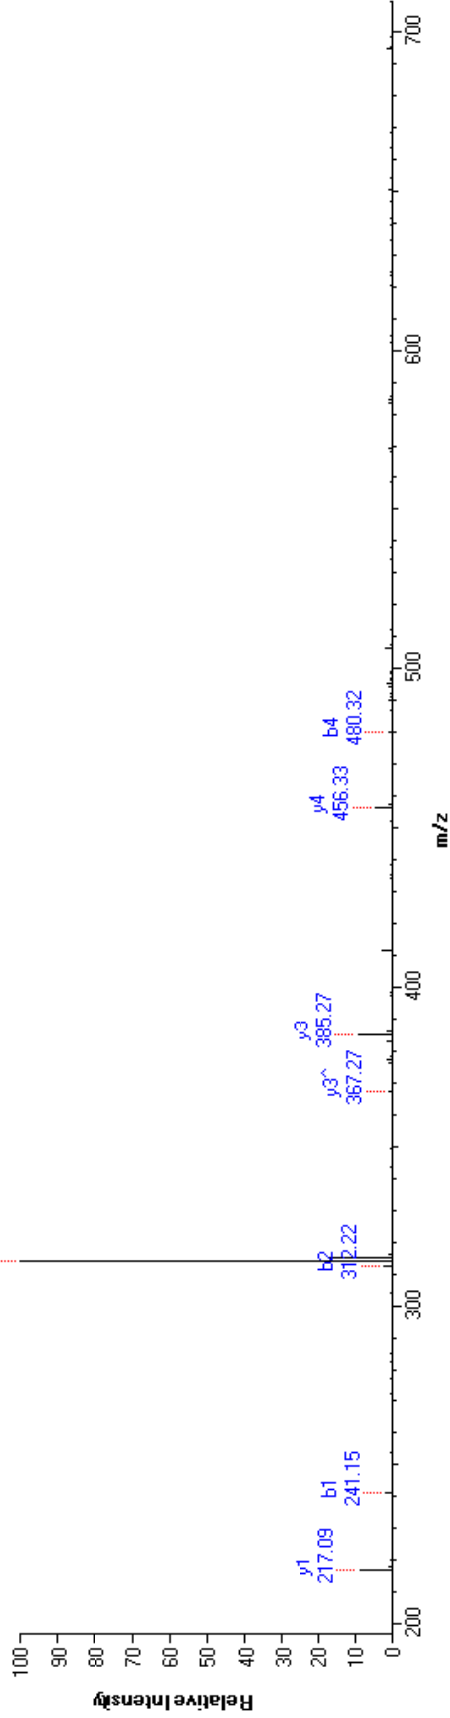

| [b] Seq [y] | b           | b <sup>+</sup> | b <sup>++</sup> | y           | y <sup>+</sup> | y <sup>++</sup> |
|-------------|-------------|----------------|-----------------|-------------|----------------|-----------------|
| 1 K 5       | 241.1028 ** | 224.0762       | 223.0922        | 640.3353    | 623.3087       | 622.3247        |
| 2 A 4       | 312.1399 ** | 295.1133       | 294.1293        | 456.2403 ** | 439.2138       | 438.2298        |
| 3 A 3       | 383.1770    | 366.1505       | 365.1664        | 385.2032 ** | 368.1767       | 367.1927 **     |
| 4 P 2       | 480.2298 ** | 463.2032       | 462.2192        | 314.1661 ** | 297.1396       | 296.1555        |
| 5 K 1       | 678.3247    | 661.2982       | 660.3141        | 217.1133 ** | 200.0868       | 199.1028        |
